# Supplementary material for: Cow’s microbiome from antepartum to postpartum: A long-term study covering two physiological challenges
Source: Front Microbiol. 2022 Nov 16;13:1000750. doi: 10.3389/fmicb.2022.1000750 (PMC9709127; doi:10.3389/fmicb.2022.1000750)
Supplement: Supplementary file 1 [file Table_1.XLSX]

## Sheet: OTU_Data
Supplementary Data 1
OTU	00112hLD	00124hKD	00124hLD	00172hLD	001m14D	001m42D	333m42D	001p100D	001p118D	001p126D	001p14D	03912hKD	03924hKD	03972hKD	039m14D	039m42D	039p14D	24512hKD	24512hLD	24524hKD	24524hLD	24572hKD	24572hLD	245m14D	245m42D	245p100D	245p118D	245p126D	245p14D	24812hLD	248m14D	248m42D	248p100D	30412hKD	30412hLD	30424hKD	30424hLD	30472hKD	30472hLD	304m14D	304m42D	304p100D	304p118D	304p126D	304p14D	30624hKD	30672hKD	306m14D	306m42D
OTU1	0	111	0	65	155	16	5	18	134	0	6	0	0	4	37	0	346	4	0	0	0	573	6	0	16	0	6	0	166	9	78	323	14	821	31	632	72	283	105	27	0	14	1108	38	9	520	741	381	0
OTU100	146	29	250	266	117	159	0	121	150	181	142	99	66	129	58	93	27	0	0	0	0	0	0	0	0	0	0	0	0	0	0	0	0	0	0	0	0	0	0	0	0	0	0	0	0	0	0	0	0
OTU1000	149	0	131	202	0	0	0	60	51	123	0	0	0	0	0	0	0	0	0	0	23	0	0	0	0	18	0	0	0	0	0	0	0	0	0	0	0	0	0	0	0	0	0	0	0	0	0	0	0
OTU1003	86	0	117	63	0	0	0	0	0	45	0	0	0	0	0	0	0	0	0	0	0	0	0	0	0	0	63	74	0	0	0	76	0	0	255	0	150	0	91	0	0	0	123	0	0	0	0	0	0
OTU1004	47	0	103	41	0	0	0	0	0	5	0	22	0	10	14	9	0	0	0	0	0	0	0	8	0	0	0	0	0	0	0	0	0	0	0	0	0	0	0	0	0	0	0	0	0	0	0	0	0
OTU1009	40	4	55	61	47	37	0	46	17	52	64	0	0	0	14	0	0	0	0	0	0	0	0	0	0	0	0	0	0	0	0	0	0	0	0	0	0	0	0	0	0	0	0	0	0	0	0	0	0
OTU1013	0	8	0	0	0	0	0	0	0	0	0	0	0	0	0	0	0	0	0	0	0	21	0	0	0	0	0	0	0	0	0	0	0	0	0	0	0	0	0	0	0	0	0	0	0	0	0	0	0
OTU1016	49	0	58	72	0	0	0	27	30	36	0	0	28	26	0	0	35	0	0	0	0	0	0	0	0	0	0	0	0	0	0	0	0	0	0	0	0	0	0	0	0	0	0	0	0	0	0	0	0
OTU102	0	205	0	0	0	0	0	0	0	0	0	0	0	0	0	0	0	0	0	0	0	0	0	0	0	0	0	0	0	0	0	0	0	0	0	0	0	0	0	0	0	0	0	0	0	0	0	0	0
OTU1021	0	0	0	0	0	0	0	0	0	0	0	19	0	0	34	26	0	54	0	42	0	0	0	13	0	0	0	0	0	0	0	0	0	0	0	0	0	0	0	0	0	0	0	0	0	0	0	0	0
OTU1027	0	0	0	0	75	0	0	0	0	0	0	47	70	128	0	0	0	0	0	28	0	0	0	0	0	0	0	0	0	0	0	27	0	0	0	0	0	0	0	0	0	0	0	0	0	0	0	0	0
OTU1028	0	0	0	0	0	0	0	0	0	0	80	0	0	0	0	0	0	0	0	0	0	0	0	0	0	0	45	0	0	107	0	0	30	0	0	0	0	0	0	0	0	0	0	0	0	0	0	0	0
OTU1030	0	0	0	0	10	11	0	0	0	0	0	0	11	0	0	27	13	10	0	9	0	0	0	6	0	0	0	0	14	0	16	15	0	0	0	0	0	0	0	0	0	0	0	0	0	0	0	0	0
OTU1031	76	0	38	213	0	0	19	33	0	0	0	0	0	0	0	0	0	0	45	0	21	0	58	15	0	16	43	38	0	43	0	54	14	0	20	0	0	24	132	0	0	0	30	0	0	0	0	0	21
OTU1033	112	0	49	0	11	0	10	0	28	13	0	4	0	0	0	0	31	0	0	0	0	0	28	0	0	0	15	11	10	7	0	14	6	0	0	0	0	0	20	0	0	19	0	0	0	0	8	0	0
OTU1034	0	0	0	0	0	0	0	0	0	0	0	0	13	54	9	0	0	0	0	5	0	0	0	51	0	0	0	0	8	0	0	131	0	43	9	44	0	88	10	0	0	9	1172	0	0	24	42	0	0
OTU1038	51	0	42	44	19	18	7	61	31	18	33	0	0	0	0	0	0	0	29	0	26	0	25	0	0	28	21	36	39	14	20	64	12	21	55	0	43	17	10	23	30	0	21	0	47	22	15	41	0
OTU104	30	0	1691	29	115	69	0	0	2	6	0	97	243	111	191	77	21	23	0	20	0	117	0	90	217	0	0	0	0	0	0	0	0	0	0	0	0	0	0	0	0	0	0	0	0	0	0	0	0
OTU1040	0	0	0	20	0	0	9	0	0	0	0	0	0	0	0	0	0	0	20	0	14	0	45	0	0	33	0	6	0	0	0	54	0	0	149	0	156	0	129	0	0	0	125	0	0	0	0	0	0
OTU1043	77	0	0	0	0	0	0	75	0	0	67	0	0	0	0	0	0	0	0	0	0	0	0	0	0	0	0	0	0	0	0	0	0	0	0	0	0	0	0	0	0	0	0	0	0	0	0	0	0
OTU1048	0	0	30	18	28	36	0	0	0	0	29	54	0	20	0	21	35	0	0	0	0	0	0	0	0	0	0	0	0	0	0	0	0	0	0	0	0	0	0	0	0	0	0	0	0	0	0	0	0
OTU1051	63	0	79	87	0	0	0	51	56	45	0	0	0	0	0	0	0	0	0	0	0	0	0	0	0	0	0	0	0	0	0	0	0	0	0	0	0	0	0	0	0	0	0	0	0	0	0	0	0
OTU1056	46	0	44	59	0	0	0	30	49	27	0	0	0	0	0	0	0	0	25	0	38	0	19	0	0	34	0	17	0	0	0	37	0	0	0	0	0	0	0	0	0	0	0	179	0	0	0	0	0
OTU1057	6	0	0	16	0	0	0	7	6	0	0	0	0	0	0	0	0	0	0	0	0	0	0	0	0	7	7	8	0	0	0	17	6	0	4	0	0	0	12	0	0	0	26	106	5	0	0	0	14
OTU1059	0	0	0	0	0	0	0	0	0	0	0	41	34	96	118	0	0	26	0	16	0	0	0	59	0	0	0	0	0	0	0	43	0	249	0	129	0	233	0	97	0	0	0	0	0	0	0	0	0
OTU106	11	0	16	0	0	0	0	0	0	0	0	0	0	11	0	0	0	0	0	0	0	0	0	0	0	0	0	0	0	0	14	0	0	0	0	0	0	0	0	0	0	0	0	0	0	0	0	0	0
OTU1062	0	0	0	0	0	0	0	0	0	0	0	46	82	80	67	22	217	37	0	36	0	40	0	19	34	0	0	0	86	0	0	21	0	54	0	48	0	32	0	12	0	0	0	0	0	0	0	0	0
OTU1065	0	26	41	33	96	30	0	23	0	22	0	55	112	71	59	46	107	0	0	0	0	0	0	0	0	0	0	0	0	0	0	0	0	0	0	0	0	0	0	0	0	0	0	0	0	0	0	0	0
OTU1066	0	0	0	0	0	0	0	0	0	8	0	228	721	91	62	0	0	19	0	37	0	0	0	49	0	0	0	0	64	0	0	18	0	63	0	80	0	26	0	25	0	0	0	0	0	0	0	0	0
OTU1067	27	0	24	26	11	0	0	7	4	0	5	0	0	0	0	0	20	0	0	0	10	0	12	0	0	0	0	0	33	0	13	36	0	24	0	28	0	14	0	21	31	0	0	105	150	8	13	35	8
OTU108	18	0	31	28	0	0	0	0	13	0	0	0	0	0	0	0	24	0	0	0	0	0	15	0	0	0	5	0	18	0	0	52	0	29	34	23	34	19	38	19	26	0	49	148	36	15	29	22	0
OTU1081	21	0	6	6	7	0	0	6	4	0	0	0	4	9	0	0	11	0	8	0	6	22	0	3	12	6	0	9	4	0	0	8	0	8	0	7	0	0	0	7	7	0	0	0	0	0	0	0	0
OTU1082	51	0	23	24	17	19	21	42	21	58	0	13	0	24	24	21	17	7	41	8	23	14	36	22	25	22	17	23	15	0	18	81	0	8	0	24	0	29	0	23	90	0	22	0	7	9	7	29	41
OTU1083	7	1836	0	19	15	70	0	0	0	0	0	31	0	0	20	0	0	0	0	0	0	0	0	0	0	0	0	0	0	0	0	0	0	0	0	0	0	0	0	0	0	0	0	0	0	0	0	0	0
OTU1090	98	0	38	63	0	0	0	62	121	70	234	0	0	0	0	0	0	0	0	0	0	0	0	0	0	0	0	0	0	0	0	0	0	0	0	0	0	0	0	0	0	0	0	0	0	0	0	0	0
OTU1095	0	0	0	0	0	0	0	0	0	0	0	0	0	0	0	0	0	0	0	0	0	0	0	0	0	11	0	0	0	0	0	14	0	0	0	0	0	0	0	0	0	0	0	0	0	0	0	0	22
OTU1099	38	7	37	62	11	7	0	14	18	11	11	20	11	0	9	18	19	24	14	22	12	8	12	0	0	8	4	0	51	0	0	0	0	0	0	0	0	0	0	0	0	0	0	0	0	0	0	0	0
OTU11	3366	90	1509	4667	26	3	0	4532	6042	4249	5404	0	41	59	15	15	310	74	14	119	0	20	21	0	4	36	22	23	15	10	0	9	21	0	0	0	0	0	0	0	0	8	0	0	0	0	0	0	0
OTU1104	0	0	0	0	0	0	0	0	0	0	0	0	0	0	0	0	0	0	0	0	0	0	0	0	0	0	0	0	29	0	23	23	0	8	0	10	0	14	0	8	0	0	0	0	70	14	20	9	0
OTU1107	0	0	0	0	0	0	0	0	6	0	78	0	0	0	0	0	0	0	0	0	0	0	0	0	0	0	37	0	0	0	0	0	51	0	0	0	0	0	0	0	0	0	0	0	59	0	0	0	0
OTU1115	33	0	29	56	0	0	29	14	30	28	0	0	0	0	0	0	0	0	27	0	20	0	43	0	0	26	22	27	6	26	0	22	0	0	25	0	22	0	8	0	24	0	17	0	0	0	0	0	0
OTU1117	0	0	0	0	0	0	0	0	0	0	0	51	57	116	64	0	91	0	0	0	0	49	0	83	0	0	0	0	118	0	36	42	0	76	0	47	0	75	0	89	0	0	0	0	0	48	37	0	0
OTU112	487	0	1033	2000	0	0	0	526	1000	633	0	0	0	0	0	0	0	0	0	0	0	0	0	0	0	0	0	0	0	0	0	0	0	0	0	0	0	0	0	0	0	0	0	0	0	0	0	0	0
OTU1121	0	0	0	0	0	14	0	0	0	0	0	19	16	0	21	0	57	0	0	0	0	0	0	16	0	0	0	0	0	0	0	0	0	20	0	0	0	0	0	28	0	0	0	0	0	0	0	0	0
OTU1126	25	0	29	9	9	23	0	0	0	0	0	0	0	0	0	0	0	0	0	0	0	0	0	0	0	0	0	0	0	0	0	0	0	0	0	0	0	0	0	0	0	0	0	0	0	0	0	0	0
OTU1133	0	0	0	0	16	0	0	0	0	0	9	98	158	278	0	0	157	39	0	23	0	36	0	47	27	0	0	0	24	0	55	37	0	0	0	0	0	0	0	0	25	0	0	0	0	0	0	0	0
OTU1134	28	0	26	46	0	0	0	28	28	16	0	0	0	0	0	0	0	0	38	0	22	0	33	0	0	43	51	29	0	0	0	0	0	0	0	0	0	0	0	0	0	0	0	0	0	0	0	0	0
OTU1138	0	0	42	36	31	22	0	0	0	52	0	32	31	0	20	26	0	0	0	0	0	0	0	0	0	0	0	0	0	0	0	0	0	0	0	0	0	0	0	0	0	0	0	0	0	0	0	0	0
OTU114	135	0	101	185	0	7	0	275	737	266	243	0	0	0	0	0	0	0	152	7	73	0	320	0	0	276	485	194	915	126	0	86	284	0	45	0	43	0	174	0	0	174	177	15	0	0	0	0	0
OTU1145	37	0	39	0	37	42	0	0	0	0	0	42	35	0	0	105	42	0	0	0	0	0	0	0	0	0	0	0	0	0	0	0	0	0	0	0	0	0	0	0	0	0	0	0	0	0	0	0	0
OTU1147	51	0	60	0	102	0	0	0	0	39	68	85	151	250	71	66	155	0	0	0	0	0	0	0	0	0	0	0	0	0	0	0	0	0	0	0	0	0	0	0	0	0	0	0	0	0	0	0	0
OTU115	139	0	123	123	0	0	0	299	141	173	0	0	0	0	0	0	0	0	50	0	22	0	12	0	0	107	116	78	0	0	0	38	0	0	0	0	0	0	0	0	0	0	0	0	0	0	0	0	0
OTU1150	47	0	37	0	0	0	0	7	0	0	0	0	0	0	0	0	0	0	0	0	0	0	0	0	0	0	18	21	44	149	0	0	49	0	0	0	0	0	0	0	0	0	0	0	0	0	0	0	0
OTU1153	17	11	19	38	0	18	0	21	27	21	17	20	0	20	30	34	0	10	0	19	0	20	0	0	0	22	0	0	0	0	0	0	0	0	0	0	0	0	0	0	0	0	0	0	0	0	0	0	0
OTU1156	10	0	0	9	9	0	0	0	0	7	0	9	0	9	6	0	12	0	0	0	0	0	0	12	0	0	0	0	0	0	0	0	0	0	0	0	0	0	0	0	0	0	0	0	0	0	0	0	0
OTU1157	0	0	0	0	0	0	0	0	0	0	0	28	38	73	51	31	34	27	0	0	0	87	0	18	6	0	0	0	0	0	0	0	0	54	0	49	0	37	0	21	0	0	0	0	0	0	0	0	0
OTU116	0	0	0	0	0	0	0	72	0	0	32	0	0	0	0	0	0	0	0	0	0	0	0	0	0	0	0	0	0	0	0	0	0	0	0	0	0	0	0	0	0	0	0	19	0	6	0	0	0
OTU1160	0	0	0	0	122	63	0	0	0	0	0	0	0	0	0	0	0	0	0	0	0	0	0	0	0	0	0	0	0	0	0	0	0	0	0	0	0	0	0	0	0	0	0	0	0	0	0	0	0
OTU1164	0	0	0	0	0	0	0	16	0	0	0	0	0	0	0	0	0	0	0	0	0	0	0	0	0	0	0	0	0	0	0	0	0	0	0	0	0	0	0	0	0	0	0	0	0	0	0	0	0
OTU1167	0	18	21	0	48	65	0	20	16	20	0	21	24	60	0	28	0	0	0	0	0	0	0	0	0	0	0	0	0	0	0	0	0	0	0	0	0	0	0	0	0	0	0	0	0	0	0	0	0
OTU1170	0	0	0	306	0	0	0	0	30	0	0	0	0	0	0	0	0	0	0	0	0	0	0	0	0	0	15	62	0	0	0	47	0	13	144	77	169	31	79	0	0	0	163	0	24	20	30	0	0
OTU1176	29	0	0	23	0	0	0	19	0	18	0	0	0	0	0	0	0	0	13	0	18	0	0	0	0	0	10	19	0	0	0	40	0	0	28	0	29	0	25	0	0	0	23	98	59	0	0	0	0
OTU1179	37	0	94	11	12	23	0	21	0	24	18	0	0	0	0	0	0	0	0	0	0	0	0	0	0	0	0	0	0	0	0	0	0	0	0	0	0	0	0	0	0	0	0	0	0	0	0	0	0
OTU1181	79	0	163	77	42	24	0	32	15	0	0	0	0	0	0	0	0	0	0	0	0	0	0	0	0	0	0	0	0	0	0	0	0	0	0	0	0	0	0	0	0	0	0	0	0	0	0	0	0
OTU1183	0	0	0	0	0	0	0	569	0	8	0	0	0	0	0	0	0	0	0	0	0	0	0	0	0	0	0	0	0	0	0	0	0	0	0	0	0	0	0	0	0	0	0	0	0	0	0	0	0
OTU1187	0	0	0	0	0	0	0	0	0	0	920	0	0	0	0	0	0	0	0	0	0	0	0	0	0	0	0	0	348	0	0	0	0	0	0	0	0	0	0	0	0	0	0	0	0	0	0	0	0
OTU119	254	0	440	2566	0	0	0	5	415	0	0	0	0	0	0	4	0	0	0	0	5	0	0	0	0	0	0	0	0	0	0	13	0	5	84	0	134	0	16	0	0	0	0	3	0	0	0	0	0
OTU1191	0	0	75	67	0	0	0	36	30	32	0	18	0	0	0	0	0	0	0	0	0	0	0	0	0	0	0	0	0	0	0	0	0	0	0	0	0	0	0	0	0	0	0	0	0	0	0	0	0
OTU1192	50	0	60	79	20	0	18	0	32	0	0	12	11	0	0	0	0	0	35	0	20	0	47	0	0	28	0	0	41	0	0	30	0	0	0	0	0	0	0	0	0	14	28	0	15	0	0	0	0
OTU1194	49	0	32	37	0	71	0	72	14	0	52	0	0	0	0	0	0	0	33	0	33	0	25	0	0	55	86	58	25	567	6	71	185	5	25	0	0	0	37	0	0	126	81	36	0	0	0	0	0
OTU1196	0	0	0	0	0	7	0	0	0	0	0	0	33	13	23	0	21	0	0	14	11	16	0	24	0	0	0	0	22	0	23	16	0	15	0	0	0	11	0	0	0	0	0	0	0	0	0	0	0
OTU1197	0	0	0	0	0	0	0	0	0	0	0	0	0	0	0	0	0	0	0	0	0	0	0	0	0	0	0	0	0	0	0	0	0	0	0	0	0	0	0	0	0	0	0	0	0	0	0	0	0
OTU1199	0	2	0	0	0	4	0	0	0	2	86	0	0	0	0	0	0	0	0	0	0	115	0	8	0	0	0	0	789	0	0	0	0	0	0	0	0	0	0	0	0	0	0	0	0	0	0	0	0
OTU120	7	0	12	22	0	0	0	10	7	7	7	0	0	19	8	0	60	0	7	0	12	27	6	9	0	0	0	10	0	0	5	27	0	20	0	15	0	50	0	12	5	0	0	71	90	7	13	31	0
OTU1205	76	0	44	117	0	0	0	66	100	37	192	0	0	0	0	0	52	0	45	0	36	41	99	0	0	0	47	0	62	0	0	0	0	0	0	0	0	0	0	0	0	0	0	0	0	0	0	0	0
OTU1206	14	0	27	38	0	0	0	14	11	13	0	0	0	0	0	0	0	0	0	0	0	0	0	0	0	0	0	0	0	0	0	42	0	0	65	0	70	0	77	0	0	0	210	13	0	0	0	0	0
OTU1209	22	0	34	27	66	0	0	31	30	27	54	0	38	113	13	0	33	0	0	0	0	0	0	0	0	0	0	0	0	0	0	0	0	0	0	0	0	0	0	0	0	0	0	0	0	0	0	0	0
OTU1215	0	16	0	0	71	239	0	0	0	0	0	57	34	33	27	26	0	0	0	0	0	0	0	0	0	0	0	0	0	0	0	0	0	0	0	0	0	0	0	0	0	0	0	0	0	0	0	0	0
OTU122	225	0	189	118	0	0	0	293	453	225	2334	0	0	0	0	0	0	0	0	0	0	0	0	0	0	0	0	0	0	0	0	0	0	0	0	0	0	0	0	0	0	0	0	0	0	0	0	0	0
OTU1222	0	0	0	0	0	9	0	0	0	0	0	19	15	0	0	0	0	9	0	8	0	0	0	0	0	0	0	0	21	0	0	27	0	22	0	18	0	0	0	16	23	0	0	0	0	0	0	0	0
OTU1224	0	0	0	0	0	0	0	74	0	0	0	0	0	0	0	0	0	0	0	0	0	0	0	0	0	0	0	0	0	0	0	0	0	0	0	0	0	0	0	0	0	0	0	0	0	0	0	0	0
OTU1226	0	0	17	0	0	0	0	0	0	0	0	0	0	0	0	0	16	0	0	0	0	0	0	0	0	0	0	0	9	0	17	0	0	12	0	21	0	0	0	17	0	0	0	0	0	0	0	0	0
OTU1227	35	0	0	38	0	0	0	0	0	0	0	0	0	0	0	0	0	0	0	0	28	0	0	0	0	62	53	45	0	56	0	44	31	0	65	0	83	0	86	0	0	0	79	0	0	0	0	0	0
OTU123	146	38	166	200	73	47	0	94	96	105	34	108	116	109	145	86	340	181	75	165	43	132	30	80	245	42	46	58	96	0	105	172	26	0	0	0	0	0	0	0	0	0	0	0	0	0	0	0	0
OTU1230	38	0	99	31	89	29	0	0	19	0	21	0	59	18	74	70	40	62	0	23	0	40	0	44	106	0	0	0	41	0	0	0	0	0	0	0	0	0	0	0	0	0	0	0	0	0	0	0	0
OTU1231	13	0	22	35	0	0	0	12	22	13	0	0	0	11	0	0	0	0	0	0	0	0	0	0	0	0	0	0	0	0	0	0	0	0	0	0	0	0	0	0	0	0	0	17	12	0	0	0	0
OTU1232	9	0	8	0	44	17	0	0	0	0	0	10	0	0	16	0	15	0	0	0	0	0	6	19	18	0	0	0	33	0	17	128	0	58	0	54	0	38	0	29	18	0	0	0	0	0	0	0	0
OTU1237	0	0	0	0	6	7	15	0	0	0	0	0	12	18	13	9	15	8	0	0	0	0	0	7	7	0	0	0	9	0	8	5	0	11	0	0	0	6	0	9	0	0	0	0	48	4	4	5	24
OTU1240	0	0	0	0	0	0	37	0	0	0	0	0	15	0	28	0	0	0	0	12	0	0	0	0	0	0	0	0	0	0	0	0	0	0	0	0	0	0	0	0	0	0	0	0	0	0	0	0	0
OTU1241	0	0	0	0	0	0	0	0	0	0	0	34	44	63	36	20	0	0	0	0	0	0	0	0	0	0	0	0	0	0	0	0	0	0	0	0	0	0	0	0	0	0	0	0	0	0	0	0	0
OTU1242	25	0	20	9	7	0	0	7	0	0	0	12	12	7	14	23	26	11	0	4	0	10	0	14	15	0	0	0	6	0	0	20	0	0	0	0	0	0	0	0	0	0	0	0	0	0	0	0	0
OTU1243	61	0	39	90	45	26	5	0	0	0	0	0	0	0	0	0	6	0	0	0	0	0	20	0	0	45	0	0	25	0	0	0	0	12	0	13	30	44	68	14	16	0	43	0	13	12	0	46	26
OTU1245	33	0	44	32	0	0	14	26	11	17	0	15	0	10	0	0	0	0	32	0	32	0	20	0	0	19	17	21	14	9	0	34	21	0	20	0	0	19	31	0	0	0	31	0	0	0	0	11	17
OTU1249	45	0	11	20	0	0	0	0	52	30	77	0	0	0	0	0	0	0	0	0	0	0	0	0	0	0	0	0	0	0	0	0	0	0	0	0	0	0	0	0	0	0	0	0	0	0	0	0	0
OTU1254	0	0	0	0	43	0	11	0	0	0	0	21	30	11	25	5	33	9	0	0	0	95	0	0	0	0	0	9	10	0	9	46	0	5	0	0	9	43	0	20	22	0	0	0	0	15	47	12	34
OTU1257	0	0	31	32	0	0	0	16	0	25	0	0	0	0	15	0	0	28	0	0	11	0	20	0	0	0	0	9	0	0	0	25	0	0	0	0	0	0	0	0	0	0	0	0	0	0	0	0	0
OTU1265	8	0	0	0	0	0	0	11	0	11	54	0	0	0	0	0	0	0	0	0	0	0	0	0	0	16	31	0	0	60	0	11	20	0	0	0	0	0	0	0	0	0	0	21	0	0	0	0	0
OTU1269	26	0	8	0	13	18	14	0	0	0	0	22	15	14	24	0	34	7	14	8	20	64	0	6	0	20	38	26	14	0	0	42	23	25	0	22	0	56	0	17	28	0	0	0	0	0	0	0	0
OTU1270	279	0	129	37	0	0	0	265	45	0	0	0	0	0	0	0	0	0	0	0	0	0	0	0	0	0	0	0	0	0	0	0	0	0	0	0	0	0	0	0	0	0	0	0	0	0	0	0	0
OTU1271	0	0	12	0	0	0	0	0	0	0	0	0	0	0	0	0	0	0	11	0	0	0	0	0	0	0	0	0	0	0	0	13	0	0	19	0	0	0	10	0	0	0	14	68	0	0	0	0	0
OTU1273	64	7	50	107	0	0	0	38	89	51	101	0	0	0	0	0	47	0	42	0	41	53	85	0	0	67	39	82	131	0	0	0	0	0	0	0	0	0	0	0	0	0	0	0	0	0	0	0	0
OTU1276	0	0	0	0	68	18	0	32	0	0	27	49	81	111	105	60	130	0	0	0	0	0	0	0	0	0	0	0	0	0	0	0	0	0	0	0	0	0	0	0	0	0	0	0	0	0	0	0	0
OTU1277	0	0	0	0	0	0	0	0	0	0	0	0	0	0	0	0	0	0	42	0	92	0	0	0	0	48	0	0	0	0	0	0	0	0	151	0	67	0	0	0	0	9	51	0	0	0	0	0	0
OTU128	0	9	0	0	0	14	0	0	0	0	0	0	0	0	0	0	0	0	0	0	0	0	0	0	0	0	0	0	353	511	0	31	22	0	0	0	0	0	0	0	0	0	0	0	0	0	0	0	0
OTU1285	0	0	0	0	0	0	0	0	0	6	0	0	18	0	18	0	9	0	0	0	0	0	0	13	0	0	0	0	10	0	0	0	0	27	12	15	0	0	11	9	0	0	0	0	23	0	0	0	0
OTU1288	96	0	96	68	0	0	0	52	38	78	0	0	0	0	0	0	0	0	0	0	0	0	0	0	0	0	0	0	0	0	0	0	0	0	0	0	0	0	0	0	0	0	0	0	0	0	0	0	0
OTU1289	0	0	0	0	56	22	0	0	0	0	0	0	0	0	0	0	0	0	0	0	0	0	0	0	0	0	0	0	0	0	0	0	0	0	0	0	0	0	0	0	0	0	0	0	0	0	0	0	0
OTU129	32	0	0	0	32	152	0	144	0	0	0	56	39	1220	60	31	79	53	0	8	0	95	16	16	93	22	10	22	19	16	35	133	38	399	98	187	290	364	19	12	0	0	77	0	162	44	142	15	0
OTU1290	0	0	0	0	2	0	0	0	2	0	0	0	0	0	0	0	0	0	0	0	4	0	0	0	0	0	0	0	2	0	0	4	0	4	0	0	0	0	0	0	3	0	2	34	9	0	0	5	3
OTU1292	0	0	0	5	0	0	0	32	40	45	41	0	0	0	0	0	0	0	11	0	0	0	0	0	0	189	0	0	77	0	0	0	0	0	0	0	0	0	0	0	0	0	0	0	0	0	0	0	0
OTU1297	0	0	0	0	32	0	10	0	0	0	0	0	47	21	0	0	28	29	0	29	0	0	0	41	50	0	0	0	36	0	5	66	0	41	0	0	0	14	0	0	0	0	0	0	0	0	0	0	0
OTU1298	0	0	0	0	0	0	0	0	0	0	0	5	20	0	0	0	0	0	0	0	0	10	0	0	0	0	0	0	0	0	0	16	0	5	0	0	0	0	0	0	0	0	0	0	0	0	132	0	0
OTU13	0	160	0	0	0	0	0	0	0	0	0	0	0	0	0	0	0	0	0	28	0	0	0	0	0	0	0	0	0	0	0	0	0	0	0	0	0	0	0	4	0	3	0	0	0	0	0	0	6
OTU1307	79	0	0	0	0	0	0	11	0	0	0	0	0	0	0	0	0	0	28	0	0	0	46	0	0	24	41	17	0	55	16	37	0	0	0	0	0	17	0	0	0	0	0	0	0	0	0	0	0
OTU1310	0	0	0	0	0	0	0	0	0	0	0	4	7	8	3	0	8	2	0	0	0	0	0	0	11	0	0	0	0	0	0	4	0	0	0	10	0	0	0	6	0	0	0	0	0	0	0	0	0
OTU1311	0	0	0	0	0	0	0	0	0	0	0	157	152	149	85	0	0	47	0	30	0	12	0	47	0	0	0	0	0	0	0	19	0	58	0	47	0	36	0	34	0	0	0	0	0	23	31	0	0
OTU1312	7	0	0	0	0	0	0	0	0	0	8	0	0	0	0	0	0	0	0	0	0	0	0	0	0	0	8	0	0	19	0	11	0	0	0	0	10	0	0	0	0	0	8	102	0	0	0	0	0
OTU1313	0	0	0	0	0	0	0	0	0	0	0	0	0	0	0	0	0	0	0	0	0	0	0	0	0	0	0	0	0	0	0	0	0	0	0	0	0	0	0	0	0	0	0	0	0	0	0	0	0
OTU1314	0	8	0	0	19	0	0	0	0	0	0	0	0	0	0	27	19	0	0	0	0	0	0	8	481	0	0	0	95	0	0	0	0	0	0	0	0	0	0	0	0	0	0	0	0	0	0	0	0
OTU1316	89	0	100	127	0	0	0	0	77	0	0	0	0	0	0	0	0	0	30	32	35	69	0	0	0	44	0	26	0	0	0	0	0	0	33	0	27	0	0	35	0	0	0	0	0	0	0	0	0
OTU1317	38	0	34	66	0	0	0	0	42	0	0	0	0	0	0	0	0	0	10	0	0	0	32	0	0	0	0	0	0	0	0	59	0	0	0	0	0	0	0	0	0	0	0	145	116	0	0	0	0
OTU1323	0	0	0	0	0	0	0	0	0	0	0	40	56	75	45	21	47	23	0	0	0	26	0	45	37	0	0	0	0	0	0	0	0	0	0	0	0	0	0	0	0	0	0	0	0	0	0	0	0
OTU1324	33	18	36	78	0	0	0	14	0	0	0	0	0	0	0	0	0	0	0	0	0	0	0	0	0	46	0	0	0	0	0	0	0	0	0	0	0	0	0	0	0	0	0	0	0	0	0	0	0
OTU1328	73	0	174	65	34	42	0	21	10	49	0	0	0	0	0	0	0	0	0	0	0	0	0	0	0	0	0	0	0	0	0	0	0	0	0	0	0	0	0	0	0	0	0	0	0	0	0	0	0
OTU133	76	0	87	156	0	0	0	79	71	44	0	0	0	0	0	0	0	0	38	0	29	0	28	0	0	68	25	38	0	9	0	142	10	0	173	0	165	0	179	0	0	0	165	1272	0	0	0	0	0
OTU1331	0	0	0	0	0	0	0	0	0	0	0	75	141	113	64	89	48	38	0	46	0	59	0	0	94	0	0	0	0	0	0	0	0	0	0	0	0	0	0	0	0	0	0	0	0	0	0	0	0
OTU1337	75	0	94	45	0	0	0	11	8	24	0	0	0	0	0	0	0	0	42	0	21	0	16	0	0	0	0	38	42	0	0	41	0	0	79	0	61	0	40	22	0	0	30	0	0	0	0	0	30
OTU1338	0	0	0	0	21	19	0	0	0	0	31	25	14	0	11	34	36	37	0	31	0	0	0	0	31	0	0	0	0	0	0	0	0	0	0	0	0	0	0	0	0	0	0	0	0	0	0	0	0
OTU1339	6	15	0	0	0	17	0	0	0	16	0	0	0	0	0	0	23	0	0	0	0	0	0	0	0	0	0	0	5	732	7	136	9	61	42	0	5	47	126	280	2	86	11	120	31	0	0	0	0
OTU1344	56	0	99	23	14	0	4	21	19	37	0	0	0	0	0	0	62	7	57	0	32	0	15	7	0	14	8	20	0	9	17	34	0	7	81	8	26	7	9	12	0	0	110	0	0	0	0	27	13
OTU1345	30	0	35	26	0	0	0	15	9	21	15	0	0	0	0	0	0	0	26	0	10	0	10	0	0	7	8	9	36	0	0	40	19	76	29	56	15	60	13	34	0	0	37	0	0	0	13	57	21
OTU1346	0	0	26	0	23	0	0	0	0	0	0	39	31	36	15	10	32	14	0	13	0	17	0	13	0	0	0	0	0	0	51	46	0	36	0	31	0	35	0	31	0	0	40	0	0	0	19	28	79
OTU1349	20	0	19	45	0	0	0	17	0	0	0	0	0	0	0	11	24	0	0	0	0	0	0	37	0	5	0	0	14	0	0	0	0	0	0	0	0	0	0	0	0	0	0	0	0	0	0	0	0
OTU1352	13	0	12	19	11	0	0	8	0	0	8	0	0	0	0	0	0	0	0	0	0	0	0	0	0	0	0	0	0	0	0	0	0	0	0	0	0	0	0	0	0	0	0	0	0	0	0	0	0
OTU1353	0	0	0	0	0	0	0	0	0	0	0	0	0	0	0	0	0	0	0	0	0	0	0	0	0	0	0	0	0	0	0	0	0	0	0	0	0	0	0	0	0	0	0	0	0	0	0	0	0
OTU136	0	6	0	0	9	0	0	0	0	0	0	0	0	0	0	0	80	0	4	0	14	0	5	0	0	4	0	0	43	0	0	28	0	0	5	0	36	18	7	0	0	0	51	34	204	0	0	0	0
OTU1363	0	0	54	51	0	0	0	0	163	0	98	0	0	0	0	0	0	0	0	0	0	0	0	0	0	59	118	45	0	0	0	0	86	0	59	0	61	0	57	0	0	167	76	0	0	0	0	0	0
OTU1374	0	0	0	0	16	0	0	0	0	0	0	0	0	21	12	9	33	0	0	0	0	14	0	0	0	0	0	0	15	0	0	11	0	19	0	19	0	15	0	15	0	0	0	0	13	0	0	11	0
OTU1376	0	0	18	9	31	35	19	0	0	0	0	36	25	52	20	22	25	20	14	15	23	12	0	18	40	12	0	0	23	0	21	84	0	36	0	39	0	21	0	22	77	0	0	0	0	0	0	0	0
OTU1377	0	30	33	30	25	17	0	0	22	11	0	55	51	62	0	20	27	66	34	57	0	56	15	15	27	16	0	11	95	0	13	59	0	107	0	0	0	0	0	16	24	0	0	0	0	0	0	0	0
OTU138	24	7	126	1353	9	0	0	47	44	0	0	0	0	4	0	0	0	0	23	22	188	23	14	121	0	0	0	0	0	0	178	239	0	95	0	130	0	66	0	9	3	0	0	0	0	0	0	0	0
OTU1384	0	0	0	0	48	31	15	0	0	0	0	19	23	24	26	24	0	23	12	11	52	0	7	20	16	0	0	0	41	0	33	71	0	24	0	35	0	13	0	15	38	0	0	0	0	0	0	0	6
OTU1386	11	0	21	40	0	0	0	14	26	23	0	0	0	0	0	0	0	0	31	0	25	0	29	0	0	14	24	20	12	41	20	24	20	0	21	0	17	0	0	0	0	0	20	0	0	0	0	0	0
OTU1387	0	0	36	55	0	0	0	27	0	0	17	0	0	44	0	0	0	0	0	0	0	14	0	0	0	0	0	0	89	0	0	0	0	0	0	0	0	0	0	0	0	0	0	0	0	0	0	0	0
OTU1389	22	0	24	17	0	18	0	35	41	20	0	0	0	0	0	0	0	0	0	0	0	0	0	0	0	0	0	0	0	0	0	0	0	0	0	0	0	0	0	0	0	0	0	0	0	0	0	0	0
OTU1394	0	0	5	5	0	0	0	7	4	2	0	0	0	0	0	0	0	0	0	0	2	0	3	0	0	5	0	3	0	0	0	8	0	0	0	0	0	0	0	0	0	0	0	114	0	0	0	0	0
OTU1395	0	0	0	0	6	0	0	0	0	0	0	0	4	5	8	0	0	0	0	0	0	0	0	8	0	0	0	0	10	0	0	14	0	14	0	0	0	0	0	0	15	0	0	0	0	5	0	14	0
OTU14	920	35	499	500	11	44	0	560	1909	138	2313	0	12	16	3	0	0	21	1514	28	256	0	810	33	0	1858	0	0	3348	0	0	0	0	0	0	0	0	0	0	0	0	0	0	0	0	0	0	0	0
OTU1400	44	0	0	41	0	53	0	0	24	0	0	0	0	0	0	0	0	0	38	0	0	0	0	10	6	0	0	0	0	0	0	0	0	0	0	0	0	0	0	0	0	0	0	0	0	0	0	0	0
OTU1407	0	0	18	0	0	0	0	21	22	6	0	0	0	0	5	0	0	0	13	0	7	7	0	0	0	9	0	0	0	0	4	9	9	0	0	0	0	0	20	0	0	0	22	0	0	0	0	0	0
OTU1417	0	0	0	15	0	0	0	0	0	0	0	0	0	0	0	0	0	0	0	0	0	0	0	0	0	0	0	0	0	0	9	29	0	0	0	0	0	0	0	0	0	0	0	279	24	0	0	0	0
OTU1418	9	0	17	18	0	0	0	0	0	6	0	0	0	0	0	0	0	0	0	0	0	0	0	0	0	0	0	0	0	0	0	0	0	0	0	0	0	0	0	0	25	0	0	0	0	0	0	0	8
OTU1419	36	0	48	0	14	0	0	0	0	0	0	0	0	0	0	0	0	0	0	0	0	10	0	0	0	0	0	0	51	0	0	24	0	37	0	36	0	0	0	31	0	0	0	0	22	0	0	16	0
OTU1420	33	0	13	11	0	0	0	0	0	11	0	0	0	0	0	0	0	0	0	0	0	0	21	0	0	10	6	12	0	12	0	0	0	0	0	0	0	0	0	0	0	0	0	0	0	0	0	0	0
OTU1422	0	103	0	0	0	0	0	0	0	0	0	0	0	0	0	0	0	0	0	0	0	0	0	0	0	0	0	0	0	0	0	0	0	0	0	0	0	0	0	0	0	0	0	0	0	0	0	0	0
OTU1423	136	0	309	637	0	0	0	139	321	159	0	0	0	0	0	0	0	0	0	0	0	0	0	0	0	0	0	0	0	0	0	0	0	0	0	0	0	0	0	0	0	0	0	0	0	0	0	0	0
OTU1424	36	0	82	58	0	0	0	22	30	65	0	0	0	0	0	0	0	0	0	0	0	0	0	0	0	33	0	0	10	0	0	0	0	0	0	0	0	0	0	0	0	0	0	0	0	0	0	0	0
OTU1425	48	0	45	25	0	0	0	42	48	69	11	0	0	0	0	0	0	0	31	0	9	0	23	0	0	60	132	50	8	62	0	23	75	0	46	0	29	0	35	0	0	85	33	0	0	0	0	0	0
OTU1426	0	0	0	17	0	0	0	0	75	15	0	0	0	0	0	0	0	0	0	0	0	0	0	0	0	0	0	0	0	0	0	0	0	0	0	0	0	0	0	0	0	0	0	0	0	0	0	0	0
OTU1430	0	0	0	0	33	59	0	0	0	0	0	69	48	32	55	75	90	0	0	0	0	0	0	0	0	0	0	0	0	0	0	0	0	0	0	0	0	0	0	0	0	0	0	0	0	0	0	0	0
OTU1433	0	0	0	36	0	0	0	82	123	55	0	0	0	0	0	0	0	0	35	0	0	0	53	0	0	52	79	42	197	0	0	0	61	0	0	0	0	0	0	0	0	39	34	0	0	0	0	0	0
OTU1436	91	0	47	25	0	0	0	10	9	0	2	11	13	18	0	0	0	0	0	0	0	0	0	0	0	0	0	0	0	0	0	0	0	0	0	0	0	0	0	0	0	0	0	0	0	0	0	0	0
OTU1439	0	0	0	0	54	0	0	0	0	0	0	0	0	0	0	0	0	0	0	0	0	0	0	0	0	0	0	0	67	0	19	44	0	60	0	84	0	66	0	58	0	0	0	0	0	51	21	86	0
OTU1443	0	0	48	42	0	0	0	89	0	50	0	0	0	0	0	0	0	0	0	0	0	0	0	0	0	0	0	0	0	0	0	0	0	0	0	0	0	0	0	0	0	0	0	0	0	0	0	0	0
OTU145	0	25	0	0	0	0	0	0	0	0	0	4	0	0	2	0	0	0	0	0	0	19	0	0	0	0	0	0	0	0	0	0	0	16	0	3	0	0	0	0	0	0	2	5	0	0	32	0	6
OTU1456	0	0	0	0	0	0	0	0	36	32	143	0	0	0	0	0	0	0	0	0	0	0	0	0	0	0	0	0	0	0	0	0	58	0	0	0	0	0	0	0	0	31	41	0	142	0	0	0	0
OTU1458	23	0	0	62	0	0	0	0	13	15	0	0	0	0	0	0	0	0	0	0	32	0	0	0	0	0	28	0	0	38	0	14	0	0	0	0	22	0	23	0	0	20	33	0	0	0	0	0	0
OTU146	121	0	51	0	0	0	0	553	0	0	163	0	0	0	0	0	0	0	23	0	30	0	35	0	0	62	31	39	50	79	0	30	74	0	0	0	13	0	0	0	0	0	0	241	0	0	0	0	0
OTU1464	0	0	0	0	14	20	0	0	0	0	0	0	0	0	0	15	0	0	115	0	118	2	74	0	0	5	10	0	4	0	0	0	0	0	0	0	0	0	0	0	0	0	0	0	0	0	0	0	0
OTU1466	71	0	54	61	0	0	0	0	180	0	0	0	0	0	0	0	0	0	0	0	0	0	0	0	0	61	0	0	0	0	0	0	0	0	0	0	0	0	0	0	0	0	0	0	0	0	0	0	0
OTU1467	12	0	19	26	35	50	0	20	0	0	23	80	101	44	0	0	61	0	22	0	17	0	0	0	0	19	15	0	97	0	32	76	0	25	21	0	0	21	0	0	78	0	0	0	0	0	0	83	46
OTU147	138	8	83	89	0	0	0	105	460	43	441	0	0	0	0	0	0	0	332	0	115	0	359	0	0	371	0	0	320	0	0	0	0	0	0	0	0	0	0	0	0	0	0	0	0	0	0	0	0
OTU1471	66	0	65	64	6	26	0	41	55	74	3	0	0	0	0	7	0	0	0	0	0	0	0	0	0	40	0	0	11	0	0	0	0	0	0	0	0	0	0	0	0	0	0	0	0	0	0	0	0
OTU1473	0	0	47	45	0	0	0	30	45	44	0	0	0	0	0	0	0	0	0	0	0	0	0	0	0	0	0	0	0	0	0	0	0	0	0	0	0	0	0	0	0	0	0	0	0	0	0	0	0
OTU1475	0	0	0	0	0	0	0	0	0	0	0	0	0	0	0	0	0	0	0	0	0	0	0	0	0	0	0	0	0	0	0	0	0	0	0	0	0	0	0	0	0	0	0	0	0	0	0	0	0
OTU1477	62	0	0	67	0	0	0	0	0	0	0	0	0	0	0	0	0	0	68	0	47	0	42	0	0	62	35	68	0	0	0	0	0	0	80	0	67	0	25	0	0	0	62	50	0	0	0	0	0
OTU1478	0	0	0	0	17	0	0	0	0	0	0	52	0	59	132	0	104	0	0	0	0	0	0	0	0	0	0	0	0	0	0	0	0	0	0	0	0	0	0	0	0	0	0	0	0	0	0	0	0
OTU148	0	198	0	0	0	0	0	0	0	0	0	0	0	0	0	0	0	0	0	0	0	0	0	0	0	0	0	0	0	0	0	0	0	0	0	0	0	0	0	0	0	0	0	0	0	0	0	0	0
OTU1480	32	0	31	29	0	0	0	0	37	42	89	0	53	37	0	0	0	0	14	0	0	0	16	0	0	30	27	0	35	0	0	67	0	0	46	0	0	0	0	0	0	38	0	0	0	0	47	53	46
OTU1483	0	0	0	0	0	0	0	0	0	0	0	0	0	0	0	0	0	0	0	0	0	0	0	0	0	0	0	0	0	0	0	0	0	0	0	0	0	0	0	0	0	0	0	0	0	0	0	0	9
OTU149	151	0	48	0	0	0	0	243	35	65	151	0	0	0	0	0	0	0	79	0	0	0	0	0	0	87	0	0	938	0	0	0	0	0	0	0	0	0	0	0	0	0	0	0	0	0	0	0	0
OTU1490	0	0	31	375	8	0	0	0	23	0	0	0	0	0	0	0	0	0	0	0	0	0	17	12	0	0	23	51	0	0	0	42	0	0	125	39	163	0	46	0	0	0	122	0	0	0	0	8	0
OTU1498	0	22	0	0	0	0	0	0	0	0	0	24	0	0	0	19	25	0	0	0	0	13	0	0	0	0	0	0	0	0	0	54	0	0	0	21	0	19	0	0	37	0	0	0	0	0	0	30	49
OTU1499	36	0	33	28	5	0	0	0	24	8	8	0	0	0	0	0	0	0	18	0	11	0	8	0	0	7	0	15	0	0	0	49	0	0	9	0	9	0	16	0	0	0	24	131	55	0	0	0	0
OTU150	0	0	0	0	169	0	0	0	0	0	0	0	0	0	121	0	0	0	0	0	0	0	0	0	0	0	0	0	0	0	0	0	0	0	0	0	0	0	0	0	0	0	0	0	0	0	0	0	0
OTU1500	15	19	22	34	31	0	32	0	20	0	16	72	61	53	20	37	62	40	0	45	17	27	0	0	30	0	11	0	75	9	0	71	0	84	0	0	0	0	0	40	32	0	0	0	0	0	0	0	0
OTU1504	0	21	0	0	0	69	0	0	0	0	27	0	0	0	0	0	0	0	0	0	0	34	0	0	0	0	0	0	48	0	0	0	0	0	0	0	0	0	0	0	0	0	0	0	38	0	0	0	0
OTU1508	23	0	0	51	0	0	0	36	0	31	0	0	0	0	0	0	0	0	79	0	51	0	41	0	0	12	39	0	0	20	0	8	35	0	93	0	42	0	43	0	0	0	13	0	0	0	0	0	0
OTU1513	46	0	38	27	0	0	0	24	0	46	0	0	0	0	0	0	0	0	0	0	12	0	0	0	0	42	34	49	0	9	0	23	20	0	24	0	0	0	29	0	0	0	7	200	0	0	0	0	0
OTU1515	0	0	0	0	43	34	22	0	0	0	0	26	22	0	36	25	25	22	0	0	0	0	0	25	33	0	0	0	31	0	21	72	0	0	0	64	0	22	0	22	37	0	0	0	0	10	0	48	73
OTU1517	0	0	0	0	5	0	0	0	0	0	0	0	7	0	0	0	4	0	0	0	0	0	0	3	0	0	0	5	0	0	0	6	0	0	0	3	0	0	0	0	5	0	0	15	11	0	0	0	0
OTU1518	0	7	0	0	28	24	0	0	0	0	0	31	40	43	29	22	39	0	0	0	0	0	0	0	0	0	0	0	0	0	0	0	0	0	0	0	0	0	0	0	0	0	0	0	0	0	0	0	0
OTU1520	12	0	13	12	0	0	0	7	0	9	0	0	0	0	0	0	0	0	0	0	0	0	0	0	0	0	0	0	0	0	0	0	0	0	0	0	0	0	0	0	0	0	0	0	0	0	0	0	0
OTU1521	0	0	0	0	0	27	0	0	0	0	0	42	0	0	25	26	0	33	0	0	0	26	0	0	0	0	0	0	36	0	5	0	0	30	0	38	0	0	0	46	62	0	0	0	0	0	0	0	0
OTU1525	40	0	41	32	0	0	0	32	0	42	0	0	0	0	0	0	0	0	40	0	26	0	16	0	0	50	19	24	0	0	10	54	0	14	0	14	0	0	0	14	6	0	0	0	0	0	0	0	0
OTU1528	0	0	0	0	9	0	26	0	0	0	0	0	0	0	0	0	0	0	62	0	75	0	24	0	0	0	0	30	0	0	25	33	0	0	26	0	0	0	0	5	0	0	27	0	0	0	0	0	0
OTU154	0	0	0	33	14	0	6	0	0	0	0	0	0	0	0	0	25	0	0	0	18	0	0	0	0	0	9	19	0	0	14	32	0	0	51	61	26	0	43	0	0	0	31	235	42	0	0	0	0
OTU1541	0	0	3	5	0	0	0	0	0	0	0	0	0	2	5	0	0	0	0	0	0	3	0	0	0	0	3	0	7	0	0	4	0	0	0	0	0	0	0	2	5	0	0	12	0	0	0	0	0
OTU1544	19	0	0	35	0	0	0	0	0	0	0	69	119	208	48	42	173	0	0	0	0	0	0	0	0	0	0	0	0	0	0	0	0	0	0	0	0	0	0	0	0	0	0	0	0	0	0	0	0
OTU1546	0	0	10	15	0	30	15	0	6	0	0	54	49	28	68	28	45	0	0	23	0	0	0	24	25	0	0	0	52	0	0	39	0	0	29	0	25	0	0	0	21	0	21	0	0	49	0	0	0
OTU1547	0	0	0	0	0	0	0	0	0	0	0	22	0	0	0	0	42	16	0	0	0	0	0	14	45	0	0	0	0	0	0	0	0	30	0	0	0	0	0	33	0	0	0	0	0	0	0	0	0
OTU1549	5	0	0	0	5	0	0	0	5	0	0	0	0	0	0	0	0	0	0	0	0	0	0	0	0	4	0	4	5	0	3	11	0	0	0	0	0	0	0	0	0	0	0	0	0	0	0	0	0
OTU1553	62	0	50	59	0	0	0	56	0	0	27	0	0	0	0	0	0	0	0	0	0	0	0	0	0	0	0	0	0	0	0	46	0	0	0	0	0	0	19	0	0	0	0	0	0	0	0	0	0
OTU1554	0	14	0	0	0	72	0	0	0	0	0	0	0	0	0	0	0	0	0	0	0	0	0	0	0	0	0	0	0	0	0	0	0	0	0	0	0	0	0	0	0	0	0	0	0	0	0	0	0
OTU1556	78	0	107	42	29	41	0	0	38	0	0	0	0	0	0	0	0	0	0	0	0	0	0	0	0	0	0	0	0	0	0	0	0	0	0	0	0	0	0	0	0	0	0	0	0	0	0	0	0
OTU1561	0	0	0	0	0	0	0	6	0	0	0	0	0	0	0	0	0	0	29	0	0	0	0	0	0	114	37	0	0	4	0	16	14	0	19	0	28	0	74	0	0	0	0	0	0	0	0	0	0
OTU1562	0	0	0	0	0	0	0	0	0	0	0	69	0	0	0	0	0	0	0	28	0	0	0	0	0	0	0	0	0	0	0	0	0	0	26	0	16	0	0	0	0	0	0	86	59	0	0	0	0
OTU1564	0	0	62	40	0	0	56	0	0	0	0	0	0	0	0	0	0	0	0	0	0	0	0	0	0	0	0	0	0	0	0	88	0	0	0	0	0	0	0	0	0	0	0	0	0	0	0	0	0
OTU1567	56	0	0	62	0	0	0	0	29	67	0	0	0	0	0	0	0	0	0	0	0	0	0	0	0	0	0	0	0	0	0	0	0	0	0	0	0	0	0	0	0	0	0	0	0	0	0	0	0
OTU1569	58	0	13	0	0	0	0	132	0	53	0	0	0	0	0	0	0	0	44	0	0	0	6	0	0	0	88	350	0	0	0	0	0	0	0	0	0	0	0	0	0	0	0	0	0	0	0	0	0
OTU1570	0	0	0	0	0	0	0	0	0	0	0	0	0	9	0	0	0	0	133	0	78	0	248	0	0	0	0	0	0	0	0	0	0	0	0	0	0	0	0	0	0	0	0	0	0	0	0	0	0
OTU1575	0	0	27	22	0	0	0	0	15	13	0	0	0	0	0	0	0	0	30	0	51	0	26	0	0	26	27	43	0	0	0	14	0	0	24	0	21	0	15	0	0	0	27	0	0	0	0	0	0
OTU1576	18	0	21	19	13	0	0	0	7	0	0	10	0	0	34	8	13	6	0	0	0	0	14	0	8	0	0	0	20	13	16	23	0	18	19	12	13	15	0	20	7	0	13	0	0	6	0	14	0
OTU1580	0	0	0	0	88	26	47	0	0	0	0	0	0	144	30	44	26	19	0	20	0	24	0	27	0	0	0	0	10	0	0	59	0	21	0	42	0	58	0	49	46	0	0	0	0	0	0	0	0
OTU1581	0	126	0	0	0	0	0	0	0	0	0	0	0	3	0	0	0	0	0	0	0	0	0	0	0	0	0	0	0	0	0	0	0	13	0	14	0	3	0	0	0	0	0	0	0	0	0	0	0
OTU1586	0	15	0	0	0	14	0	0	0	0	0	11	0	0	18	14	12	0	25	19	23	14	10	16	0	0	0	0	0	0	17	33	0	19	0	13	0	16	0	11	22	0	0	0	0	7	13	34	44
OTU1592	0	0	0	0	43	0	0	0	24	14	0	0	0	0	0	0	0	0	0	0	0	0	0	0	0	0	0	0	17	0	0	0	0	0	0	0	0	0	0	0	0	0	0	0	0	0	0	0	0
OTU1596	0	0	0	0	43	0	0	0	0	0	0	0	0	41	0	66	37	0	0	0	0	38	0	30	0	0	0	0	0	0	35	70	0	21	0	42	0	108	0	43	0	0	0	0	0	0	0	0	0
OTU16	18	14	15	46	84	43	14	0	14	10	0	108	182	139	104	74	158	52	18	39	30	37	11	90	87	23	0	0	61	0	95	108	0	89	13	112	23	90	33	83	45	0	67	177	165	31	46	123	49
OTU160	24	18	74	82	83	65	29	23	15	39	0	67	78	43	117	155	6	171	197	90	204	41	38	92	101	57	13	36	151	0	86	169	0	93	44	86	26	83	52	87	0	0	75	0	0	39	33	107	52
OTU1604	45	0	39	35	0	0	0	40	10	28	0	0	0	0	0	0	0	0	33	0	0	0	40	0	0	26	27	67	0	0	18	40	22	0	38	0	55	16	51	0	7	0	36	0	29	0	34	22	33
OTU1608	0	0	35	26	0	0	0	0	0	0	0	0	0	0	0	0	0	0	51	0	58	0	27	0	0	24	0	0	25	0	0	0	6	0	17	0	0	0	29	0	0	0	0	0	0	0	0	0	0
OTU1611	0	0	0	0	0	0	0	3	0	5	0	0	0	0	0	0	0	0	3	0	0	0	0	0	0	0	0	0	0	0	0	7	0	0	0	5	0	0	6	0	4	0	0	0	18	0	0	0	0
OTU1612	15	0	10	14	0	0	0	16	0	0	0	0	0	0	0	0	0	0	17	0	0	0	14	0	0	18	0	0	0	0	0	0	0	0	0	0	0	0	0	0	0	0	16	38	0	0	0	0	0
OTU1613	25	0	15	7	0	0	0	24	21	0	68	0	0	0	0	0	0	0	0	0	0	0	0	0	0	0	0	0	0	0	0	0	0	0	0	0	0	0	0	0	0	0	0	0	0	0	0	0	0
OTU1616	19	0	0	0	0	0	0	18	0	0	0	0	0	0	0	0	0	0	0	0	0	0	0	0	0	0	24	18	0	0	0	0	0	0	0	0	0	0	0	0	0	0	0	0	0	0	0	0	0
OTU1620	0	0	0	0	0	53	0	0	0	0	0	0	0	0	0	0	0	0	45	0	54	0	0	0	0	0	0	0	60	0	0	57	0	0	0	0	0	0	0	0	49	0	0	0	0	0	0	0	62
OTU1621	24	0	15	0	0	0	0	0	10	20	0	0	0	0	0	0	0	0	16	0	0	0	0	0	0	38	70	23	0	0	0	0	0	0	28	0	23	0	44	0	0	0	39	0	0	0	0	0	0
OTU1622	0	0	0	49	0	0	0	0	0	0	0	0	0	56	50	0	99	7	0	0	0	0	0	53	20	0	0	0	0	0	0	0	0	0	0	0	0	0	0	0	0	0	0	0	0	0	0	0	0
OTU1625	0	0	0	0	59	71	0	0	0	0	0	23	31	93	22	0	12	26	0	0	0	0	0	34	18	0	0	0	34	0	0	50	0	69	0	55	0	18	0	0	49	0	0	0	0	49	0	68	50
OTU1627	40	0	65	39	0	0	0	29	34	0	0	0	0	0	0	0	0	0	0	0	0	0	0	0	0	0	0	0	0	0	0	0	0	0	0	0	0	0	0	0	0	0	0	0	0	0	0	0	0
OTU1628	0	31	0	0	78	13	8	0	0	0	0	0	5	0	0	79	0	16	0	14	0	0	0	0	8	0	0	0	0	0	41	19	0	0	0	0	0	0	0	0	7	0	0	0	0	0	0	0	0
OTU1629	0	0	0	0	0	16	0	0	0	0	0	0	0	0	0	0	0	0	0	0	0	0	0	0	0	0	0	8	0	0	0	0	0	0	0	0	0	0	0	0	0	0	0	0	0	0	0	0	0
OTU1631	7	0	0	0	0	0	0	0	0	48	0	0	0	0	0	0	0	0	0	0	0	0	0	0	0	0	0	0	0	0	0	0	0	0	0	0	0	0	0	0	0	0	0	0	0	0	0	0	0
OTU1633	0	0	0	0	0	0	0	0	0	0	0	101	130	79	45	80	47	48	0	61	0	0	0	0	73	0	0	0	0	0	0	0	0	0	0	0	0	0	0	0	0	0	0	0	0	0	0	0	0
OTU1634	0	53	0	0	95	114	0	0	0	0	0	0	0	0	0	0	0	0	0	0	0	0	0	0	0	0	0	0	0	0	0	0	0	0	0	0	0	0	0	0	0	0	0	0	0	0	0	0	0
OTU1636	22	0	0	52	0	0	0	37	63	30	35	0	0	0	0	0	0	7	30	0	21	0	131	0	0	239	68	149	90	0	0	0	0	0	0	0	0	0	0	0	0	0	0	0	0	0	0	0	0
OTU1637	53	0	0	48	0	0	0	49	0	11	0	0	0	0	0	0	0	0	0	0	82	0	36	0	0	58	0	0	78	0	0	0	0	0	0	0	0	0	0	0	0	0	0	0	0	0	0	0	0
OTU1639	43	0	54	78	45	50	0	29	30	33	25	0	0	11	0	10	27	0	0	0	0	0	0	0	0	18	0	0	28	0	0	0	0	0	0	0	0	0	0	0	0	0	0	0	0	0	0	0	0
OTU164	0	18	0	0	42	30	0	0	0	0	0	125	208	432	127	15	0	0	0	0	0	0	0	0	0	0	0	0	0	0	0	0	0	0	0	0	0	0	0	0	0	0	0	0	0	0	0	0	0
OTU1641	12	0	20	58	0	0	0	0	8	13	0	0	0	0	0	0	0	0	0	0	0	0	0	0	0	0	7	9	0	0	0	0	0	0	0	0	0	0	0	0	0	0	0	0	0	0	0	0	0
OTU1649	0	0	0	0	0	0	0	0	0	0	0	0	0	0	0	0	0	0	0	0	0	0	0	0	0	0	0	0	0	0	0	0	0	0	0	0	0	0	0	0	0	0	0	0	0	0	0	0	0
OTU165	207	0	227	270	0	10	59	122	97	132	0	0	10	23	0	7	0	0	137	0	82	0	58	0	0	73	56	90	0	106	28	184	42	0	192	0	163	0	118	0	0	0	101	0	0	0	0	0	27
OTU1654	0	0	0	0	57	19	0	0	0	0	0	47	48	21	48	0	73	0	0	0	0	0	0	22	0	0	0	0	53	0	20	0	0	37	0	43	0	43	0	51	0	0	0	0	0	18	19	31	0
OTU1656	0	0	0	0	5	0	0	0	0	0	0	15	15	10	34	11	7	17	0	0	0	7	0	0	7	0	0	0	11	0	0	0	0	19	0	8	0	5	0	9	9	0	0	0	10	0	0	0	0
OTU1657	0	0	0	0	76	32	0	0	0	0	0	39	58	63	44	77	78	67	0	0	0	45	0	36	81	0	0	0	0	0	0	0	0	38	0	0	0	0	0	0	0	0	0	0	0	36	27	45	0
OTU1658	0	0	0	0	0	0	0	0	0	0	0	91	137	55	38	0	24	47	0	26	0	0	0	25	96	0	0	0	0	0	0	0	0	30	0	53	0	0	0	0	0	0	0	0	0	0	0	31	0
OTU1660	23	0	55	42	0	0	0	40	13	27	0	0	0	0	5	17	0	0	0	0	0	0	0	0	0	0	0	0	0	0	0	0	0	0	0	0	0	0	0	0	0	0	0	0	0	0	0	0	0
OTU1662	44	0	35	0	0	0	0	48	0	0	22	0	0	0	0	0	0	0	0	0	0	0	0	0	0	0	0	0	0	0	0	0	0	0	0	0	0	0	0	0	0	0	0	0	0	0	0	0	0
OTU1664	39	0	59	42	0	27	0	39	0	24	17	0	0	0	42	0	0	0	0	0	0	0	0	0	0	0	0	0	0	0	0	0	0	0	0	0	0	0	0	0	0	0	0	0	0	0	0	0	0
OTU1667	14	0	22	49	28	5	10	8	9	12	7	0	0	0	0	0	0	0	16	0	28	0	24	0	0	10	6	18	22	0	29	46	0	0	0	0	0	0	0	0	0	0	0	0	0	0	0	0	0
OTU1668	49	9	110	84	114	26	0	0	47	55	111	0	0	0	44	25	49	0	0	0	0	0	0	0	26	0	0	0	0	0	0	0	0	0	0	0	0	0	0	0	0	0	0	0	0	0	0	0	0
OTU167	21	0	28	12	0	0	0	9	0	12	0	0	9	0	8	0	8	0	16	6	11	0	18	9	0	8	0	9	8	0	5	26	0	0	53	8	33	0	29	9	0	0	10	0	19	0	0	0	0
OTU1671	106	0	133	143	18	0	0	51	14	19	0	11	0	33	11	38	25	24	0	13	0	39	0	47	10	0	0	0	0	0	0	0	0	0	0	0	0	0	0	0	0	0	0	0	0	0	0	0	0
OTU1673	0	0	0	0	0	0	0	0	0	0	0	0	0	0	0	0	0	0	0	0	0	0	0	0	0	0	0	0	0	0	0	0	0	0	0	0	0	0	0	0	0	0	0	0	0	0	0	0	0
OTU1674	0	0	0	0	0	0	0	0	0	0	0	0	0	0	0	0	0	0	0	0	0	0	0	0	0	0	0	0	0	0	0	0	0	0	0	0	0	0	0	0	0	0	0	0	0	0	0	0	0
OTU1676	0	0	0	33	0	0	0	16	0	0	0	0	0	0	0	35	0	0	0	0	0	0	0	0	0	0	0	0	0	0	0	0	0	0	0	0	0	0	0	0	0	0	0	0	0	0	0	0	0
OTU1677	0	0	0	0	122	45	0	0	0	0	0	89	112	40	104	193	88	0	0	0	0	0	0	0	129	0	0	0	0	0	0	0	0	0	0	0	0	0	0	0	0	0	0	0	0	0	0	0	0
OTU1678	0	0	0	38	0	0	0	20	0	0	0	0	0	0	0	0	0	0	0	0	0	0	0	0	0	0	0	0	0	0	0	0	0	0	0	0	0	0	0	0	0	0	0	0	0	0	0	0	0
OTU1680	63	0	86	81	25	21	0	92	61	94	30	0	0	0	0	0	0	0	0	0	0	0	0	0	0	96	0	0	15	0	0	0	0	0	0	0	0	0	0	0	0	0	0	0	0	0	0	0	0
OTU1681	0	0	0	0	0	0	0	0	0	0	0	0	0	0	0	0	0	0	0	0	0	0	0	0	0	0	0	0	0	0	0	0	0	0	0	0	0	0	0	0	0	0	0	0	0	0	0	0	0
OTU1684	0	0	0	0	0	0	0	0	0	0	0	0	0	0	0	0	0	0	0	0	0	0	0	0	0	0	0	0	0	0	0	0	0	0	52	0	31	0	29	0	0	0	0	86	0	0	0	0	0
OTU169	192	0	141	192	31	23	0	75	52	188	24	16	22	7	17	5	8	0	0	0	0	0	0	0	0	0	0	0	0	0	0	0	0	0	0	0	0	0	0	0	0	0	0	0	0	0	0	0	0
OTU1691	0	0	21	0	22	13	0	22	9	26	0	26	33	0	20	0	22	16	47	0	47	0	0	0	33	40	0	0	44	0	0	0	0	0	0	0	0	0	0	0	0	0	0	0	0	0	0	0	0
OTU1692	0	0	13	23	0	0	25	10	7	14	8	0	0	0	28	0	0	0	13	0	11	13	0	29	0	14	0	9	0	11	0	26	0	0	43	0	40	0	10	0	0	0	10	0	6	0	0	0	19
OTU1694	0	0	0	0	0	0	0	0	0	0	0	0	0	0	0	0	0	0	0	0	0	0	0	0	0	58	0	0	0	0	0	0	0	0	0	10	0	4	0	0	0	0	0	0	0	0	0	0	0
OTU1699	0	0	0	0	0	0	0	0	0	0	0	0	0	0	0	0	0	0	0	0	0	0	0	0	0	0	0	0	0	0	0	0	0	0	0	0	0	0	0	0	0	0	0	0	0	0	0	0	0
OTU170	19	0	24	15	10	0	14	15	0	0	12	7	0	4	9	0	13	4	17	3	16	0	14	0	6	12	15	6	9	0	3	27	14	17	47	12	22	11	10	7	0	0	18	0	17	0	0	0	0
OTU1704	0	0	15	15	13	27	17	0	10	0	0	36	28	35	16	21	18	13	16	0	25	13	0	0	28	0	0	0	16	0	21	60	0	24	14	27	0	23	0	8	48	0	0	0	0	22	33	51	54
OTU1706	0	0	0	0	0	37	0	0	0	0	0	0	0	0	0	19	30	0	0	0	0	0	0	0	0	0	0	0	14	0	25	0	0	0	0	0	0	0	0	0	0	0	0	0	0	0	0	0	0
OTU1707	53	0	52	135	5	0	0	21	20	16	0	0	0	0	0	0	10	0	39	0	18	0	25	0	0	18	5	30	36	0	17	43	0	0	0	0	0	0	0	0	0	0	0	0	0	0	0	0	0
OTU1712	0	0	18	19	0	0	0	0	0	0	0	21	31	23	82	34	24	65	0	79	0	45	0	48	30	0	0	0	9	0	0	0	0	0	0	0	0	0	0	0	0	0	0	0	0	0	0	0	0
OTU172	64	0	46	47	0	0	0	90	396	43	391	0	0	0	0	0	0	0	0	0	0	0	0	0	0	210	0	0	689	0	0	0	0	0	0	0	0	0	0	0	0	0	0	0	0	0	0	0	0
OTU1724	0	0	0	0	37	30	22	0	0	0	0	28	11	62	46	35	17	9	0	5	0	0	0	42	36	0	0	0	9	0	20	30	0	0	0	0	0	0	0	44	34	0	0	0	0	0	0	0	0
OTU1729	0	0	0	0	0	0	0	0	0	0	0	0	0	0	0	0	0	0	0	0	0	0	0	0	0	0	0	0	0	0	0	0	0	0	0	0	0	0	0	0	0	0	0	0	0	0	0	0	0
OTU1733	0	0	0	0	0	0	0	0	0	0	0	0	16	0	0	0	27	0	0	0	0	0	0	0	0	0	0	0	0	0	8	0	0	0	0	25	0	17	0	0	0	0	0	0	0	18	16	25	0
OTU1736	74	0	77	41	45	33	0	42	25	32	18	0	0	0	0	0	0	0	0	0	0	0	0	0	0	0	0	0	0	0	0	0	0	0	0	0	0	0	0	0	0	0	0	0	0	0	0	0	0
OTU1738	0	0	0	0	16	11	20	0	0	0	0	50	82	83	16	21	25	20	0	9	0	15	0	19	0	0	0	0	24	0	175	52	3	0	0	0	0	0	0	0	21	0	0	0	0	0	0	0	0
OTU1742	39	0	37	31	0	0	0	0	0	5	0	30	18	43	21	0	14	17	25	0	14	21	22	20	0	14	0	0	15	0	13	24	0	14	52	21	26	18	30	0	12	0	79	0	7	0	0	0	0
OTU1747	23	0	15	27	11	0	0	30	0	0	14	0	0	0	0	0	5	0	12	0	13	0	22	0	0	31	19	21	28	0	0	47	0	14	82	13	82	14	10	10	23	0	17	0	29	0	13	24	0
OTU1749	0	0	0	0	0	0	0	0	0	0	0	0	0	0	0	0	0	0	0	0	0	43	0	0	0	0	0	0	0	5	0	7	12	0	0	0	0	7	0	0	0	10	0	0	0	0	0	0	0
OTU1750	0	0	0	0	20	0	0	0	0	0	0	14	0	0	0	0	0	0	0	0	0	0	0	0	0	0	0	0	0	0	0	0	0	0	0	0	0	0	0	0	0	0	0	0	0	0	0	0	0
OTU1754	0	0	0	66	0	0	0	0	0	0	0	0	0	0	0	0	0	8	0	9	0	0	6	0	0	0	0	0	0	0	53	39	0	35	0	54	0	36	0	0	0	0	0	0	0	0	0	0	0
OTU1755	0	0	0	0	16	0	0	0	0	0	0	0	20	0	20	13	33	0	0	0	0	0	0	0	0	0	0	0	41	0	0	10	0	22	0	20	0	11	0	0	0	0	0	0	23	0	0	23	12
OTU1756	88	0	22	25	0	0	0	32	95	33	503	0	0	0	0	0	0	0	0	0	0	0	0	0	0	0	0	0	0	0	0	0	0	0	0	0	0	0	0	0	0	0	0	0	0	0	0	0	0
OTU1758	0	0	0	0	0	0	0	132	0	0	681	0	0	0	0	0	0	0	0	0	0	0	0	0	0	0	0	0	0	0	0	0	0	0	0	0	0	0	0	0	0	0	0	0	0	0	0	0	0
OTU176	0	0	0	0	0	59	0	0	0	0	0	0	0	0	0	0	0	0	0	0	0	0	0	0	0	0	0	0	0	0	0	0	0	0	0	0	0	0	0	0	0	0	0	0	144	0	0	55	0
OTU1760	41	38	30	0	0	40	0	0	0	58	0	0	0	0	0	0	0	0	0	0	0	0	0	0	0	40	78	33	0	304	0	50	114	0	39	0	31	0	0	0	0	91	67	51	0	0	0	0	0
OTU1762	0	0	0	0	0	0	0	0	0	0	0	48	36	0	72	0	0	20	0	17	0	82	0	63	0	0	0	0	0	0	0	0	0	0	0	0	0	0	0	0	0	0	0	0	0	0	0	0	0
OTU177	207	34	101	39	0	32	0	109	84	280	23	0	0	0	0	0	0	0	0	0	0	0	0	0	0	131	351	104	7	401	7	98	277	11	0	0	0	0	0	0	0	696	17	22	0	0	0	0	0
OTU1770	0	0	0	0	8	15	0	0	0	0	0	56	35	27	47	21	8	0	0	0	0	0	0	51	51	0	0	0	0	0	0	12	0	4	0	12	0	0	0	7	0	0	0	0	0	10	8	19	33
OTU1771	0	0	32	64	0	0	0	0	0	12	79	0	0	0	0	0	0	0	0	0	0	0	0	0	0	0	0	0	0	0	0	0	0	0	0	0	0	0	0	0	0	0	0	0	0	0	0	0	0
OTU1774	0	0	0	0	0	0	0	0	0	0	451	0	0	0	0	0	0	0	0	0	0	0	0	0	0	0	0	0	40	0	0	0	0	0	0	0	0	0	0	0	0	0	0	0	0	0	0	0	0
OTU1777	0	0	33	43	26	24	13	27	34	31	0	16	18	23	0	0	0	0	29	0	39	114	26	0	0	49	32	0	0	11	23	84	20	0	0	0	0	0	0	0	26	0	0	0	0	0	0	0	0
OTU1779	20	0	20	24	24	0	0	0	0	0	0	0	0	44	0	0	0	0	22	0	0	0	16	0	0	0	10	0	24	0	0	0	15	26	0	22	8	20	0	0	15	0	0	0	9	23	43	20	19
OTU1782	0	0	0	0	27	0	0	0	0	0	0	97	97	23	62	20	0	10	0	9	0	15	0	32	55	0	0	0	12	0	8	35	0	24	0	20	0	7	2	34	7	0	0	0	0	17	10	203	0
OTU1787	30	0	37	35	16	40	0	25	23	18	0	0	0	20	14	0	27	0	20	0	21	32	19	0	29	0	0	0	20	0	0	61	0	10	31	19	33	68	20	19	27	0	23	0	0	6	0	18	0
OTU1796	0	0	0	0	0	0	0	0	0	0	0	39	52	63	27	18	0	0	0	0	0	0	0	0	0	0	0	0	0	0	0	0	0	0	0	0	0	0	0	0	0	0	0	0	0	0	0	0	0
OTU180	176	0	65	244	0	0	0	152	305	171	0	0	0	0	0	0	30	0	79	0	26	0	348	15	0	301	236	180	303	38	5	126	196	7	88	0	146	0	338	4	0	278	247	0	662	0	0	0	0
OTU1802	0	0	0	0	48	57	0	0	0	0	24	0	0	19	0	30	0	0	0	0	0	0	0	0	0	0	0	0	0	0	0	0	0	0	0	0	0	0	0	0	0	0	0	0	0	0	0	0	0
OTU1807	0	0	0	0	29	0	0	0	0	9	0	32	21	13	33	25	105	0	0	0	0	0	0	0	0	0	0	0	0	0	0	0	0	0	0	0	0	0	0	0	0	0	0	0	0	0	0	0	0
OTU1808	0	0	31	16	0	7	0	26	4	6	0	0	0	0	0	0	0	0	43	0	14	0	0	0	0	20	0	98	0	0	5	178	0	0	695	0	0	13	0	0	0	0	0	0	0	0	0	0	0
OTU1813	0	0	0	28	0	33	0	0	0	0	0	0	0	0	71	16	0	0	0	0	0	0	0	0	0	0	0	0	0	0	0	0	0	0	0	0	0	0	0	0	0	0	0	0	0	0	0	0	0
OTU1816	38	0	43	30	0	0	0	24	19	28	0	0	0	0	0	0	0	0	30	0	32	0	24	0	0	35	18	12	15	6	0	49	8	0	53	0	22	0	5	0	0	0	39	34	0	0	0	0	0
OTU1818	0	0	0	304	0	0	0	0	0	0	0	0	0	0	0	0	0	0	0	0	0	0	0	0	0	0	0	0	0	0	0	43	0	0	0	0	0	0	0	0	0	0	0	0	0	0	0	0	0
OTU1819	0	0	0	0	67	0	0	0	0	0	0	56	61	106	11	0	0	41	0	36	0	0	0	0	16	0	0	0	0	0	0	0	0	0	0	0	0	0	0	0	0	0	0	0	0	0	0	0	0
OTU1820	141	0	133	154	37	0	0	79	22	45	0	0	0	0	0	0	0	0	0	0	0	0	0	0	0	0	0	0	0	0	0	0	0	0	0	0	0	0	0	0	0	0	0	0	0	0	0	0	0
OTU1821	0	0	0	0	0	0	0	0	0	0	0	0	23	28	11	0	27	0	0	0	0	8	0	0	15	0	0	0	0	0	11	43	0	25	0	29	0	20	0	32	0	0	0	507	50	0	0	0	0
OTU1827	0	8	0	0	11	18	15	0	0	0	0	49	20	0	23	14	12	14	0	7	0	0	0	0	7	0	0	0	18	0	14	19	0	14	0	7	0	5	0	44	29	0	0	0	0	10	0	27	24
OTU183	33	0	5	0	0	24	0	116	25	13	459	0	0	0	0	0	0	0	28	0	16	0	9	0	0	28	9	83	230	261	3	70	335	0	0	0	0	0	0	0	0	0	0	0	0	0	0	0	0
OTU1830	0	0	0	0	42	0	0	0	0	0	0	0	0	38	30	0	99	0	0	0	0	0	0	0	72	0	0	0	0	0	0	64	0	0	0	29	0	0	0	0	0	0	0	0	0	0	0	0	554
OTU1832	108	0	42	0	0	0	0	64	38	0	0	0	0	0	0	0	0	0	0	0	0	0	0	0	0	0	0	0	0	0	0	0	0	0	0	0	0	0	0	0	0	0	0	0	0	0	0	0	0
OTU184	224	0	103	83	0	0	0	105	291	35	110	0	0	0	0	0	0	0	291	0	0	0	0	0	0	479	0	0	105	0	0	0	0	0	0	0	0	0	0	0	0	0	0	0	0	0	0	0	0
OTU1842	0	0	0	0	0	17	0	0	0	0	0	0	0	21	44	106	30	0	0	0	0	0	0	0	59	10	0	0	0	0	0	0	0	0	0	0	0	12	0	0	0	0	0	0	0	0	0	0	0
OTU1852	0	0	0	0	11	12	6	0	0	0	0	12	13	11	10	0	19	15	0	0	0	0	0	14	10	0	0	0	15	0	15	24	0	12	0	0	0	0	0	16	12	0	0	0	0	13	0	22	19
OTU1853	7	0	17	21	0	0	0	15	9	7	0	0	0	0	0	0	0	0	5	0	10	0	0	0	0	30	16	7	0	12	0	23	9	0	33	0	18	0	10	0	0	0	23	0	0	0	0	0	8
OTU1859	0	27	0	0	405	243	0	0	0	0	0	14	0	0	56	72	0	0	0	0	0	0	0	0	0	0	0	0	0	0	0	0	0	0	0	0	0	0	0	0	0	0	0	0	0	0	0	0	0
OTU186	17	0	0	31	0	19	0	25	0	0	0	29	24	21	0	0	0	19	0	15	24	0	22	0	0	0	0	20	0	0	31	48	0	0	74	0	81	0	0	54	0	0	0	0	45	0	0	0	0
OTU1860	0	0	0	0	24	46	0	0	0	0	0	0	0	0	0	0	0	0	0	0	0	0	0	0	0	0	0	0	0	0	0	0	0	0	0	0	0	0	0	0	0	0	0	0	0	0	0	0	0
OTU1861	15	0	11	22	0	0	0	0	0	0	0	0	0	0	0	0	0	0	0	0	0	0	0	0	0	0	0	0	0	0	6	22	0	0	27	0	22	0	52	0	0	0	0	88	41	0	0	0	0
OTU1862	0	0	0	0	0	0	0	0	0	0	34	0	0	0	0	0	0	0	0	0	0	0	0	0	0	0	0	0	0	0	0	0	0	0	0	0	0	0	0	0	0	0	0	0	0	0	0	0	0
OTU1866	24	10	59	27	22	15	0	42	8	8	10	0	0	0	15	8	0	0	0	0	0	0	0	0	0	0	0	0	0	0	0	0	0	0	0	0	0	0	0	0	0	0	0	0	0	0	0	0	0
OTU1869	0	0	0	0	0	9	0	0	0	0	0	0	0	0	0	0	0	0	0	0	0	0	0	0	0	0	0	0	0	0	0	0	0	0	0	0	0	0	0	0	0	0	0	0	0	0	0	0	0
OTU1874	0	0	0	0	11	0	0	0	0	0	0	57	45	26	34	0	18	21	0	21	0	0	0	18	32	0	0	0	20	0	0	0	0	28	0	24	0	24	0	0	0	0	0	0	0	0	24	18	0
OTU1875	0	0	32	20	0	0	0	0	12	0	0	0	0	0	0	0	0	0	0	0	0	0	0	0	0	0	0	0	0	0	0	0	0	0	0	0	0	0	0	0	0	0	0	0	0	0	0	0	0
OTU1877	39	0	38	47	0	0	0	45	22	22	0	0	0	0	0	0	0	0	0	0	0	0	0	0	0	0	0	0	0	0	0	0	0	0	0	0	0	0	0	0	0	0	0	0	0	0	0	0	0
OTU1879	0	0	0	0	5	16	0	0	0	0	0	33	27	37	5	7	19	7	0	0	0	0	0	12	13	0	0	0	0	0	19	21	0	11	0	7	0	6	0	14	21	0	0	0	0	15	5	19	14
OTU1880	11	0	17	22	18	16	0	0	8	11	0	16	0	17	0	0	0	0	0	0	0	0	0	0	0	0	0	0	0	0	0	0	0	0	0	0	0	0	0	0	0	0	0	0	0	0	0	0	0
OTU1882	17	0	15	58	0	0	0	0	0	0	0	0	0	0	0	0	0	0	0	0	0	0	0	0	0	0	0	0	0	0	0	0	0	0	0	0	0	0	0	0	0	0	0	0	0	0	0	0	0
OTU1885	28	6	0	0	9	0	0	19	0	63	48	35	36	78	7	15	44	0	0	0	0	0	0	0	0	0	0	0	0	0	0	0	0	0	0	0	0	0	0	0	0	0	0	0	0	0	0	0	0
OTU1889	0	0	0	0	0	0	0	0	0	0	0	0	24	15	0	13	7	12	0	16	0	0	0	21	0	0	0	0	0	0	0	0	0	17	0	29	0	18	0	23	0	0	0	0	0	0	0	0	0
OTU189	308	40	268	88	0	114	0	269	149	0	247	0	0	0	0	0	0	0	0	0	0	0	0	0	0	0	0	0	0	0	0	0	0	0	0	0	0	0	0	0	0	0	0	0	0	0	0	0	0
OTU1893	30	13	59	96	33	0	0	40	0	0	0	0	0	0	0	0	0	0	0	0	0	0	0	0	0	0	0	0	0	0	0	0	0	0	0	0	0	0	0	0	0	0	0	0	0	0	0	0	0
OTU1895	0	0	0	0	14	0	0	0	0	0	0	0	0	0	0	7	0	0	0	0	0	0	0	0	0	8	0	0	0	0	0	0	0	0	0	0	0	0	0	0	0	0	0	0	0	0	0	0	0
OTU1897	0	0	3	2	0	0	5	0	0	0	5	0	0	0	0	0	0	0	0	0	0	0	0	0	0	0	0	3	0	34	0	20	2	0	0	0	0	0	0	0	4	0	0	0	0	0	0	0	0
OTU1899	10	0	20	27	31	0	0	18	8	0	0	29	45	41	56	33	21	24	0	27	0	0	0	0	40	0	0	0	31	0	0	17	0	0	15	21	8	0	0	30	0	0	6	0	0	0	16	0	11
OTU1900	44	0	59	29	33	26	0	0	0	43	0	31	0	0	0	43	0	0	0	0	0	0	0	0	0	0	0	0	0	0	0	0	0	0	0	0	0	0	0	0	0	0	0	0	0	0	0	0	0
OTU1902	36	0	42	30	0	0	0	0	0	15	0	0	0	0	0	0	0	0	0	0	0	0	0	0	0	0	0	0	0	0	0	0	0	0	0	0	0	0	0	0	0	0	0	0	0	0	0	0	0
OTU1906	0	0	0	0	0	0	0	0	0	0	0	0	0	0	0	0	0	0	0	0	0	0	0	0	0	0	0	0	0	0	0	0	0	0	0	0	0	0	0	0	0	0	0	0	0	0	0	0	0
OTU1911	0	0	41	51	0	0	0	0	34	0	0	0	24	22	0	0	0	0	0	0	0	0	0	0	0	0	0	0	0	0	0	0	0	0	0	0	0	0	0	0	0	0	0	0	0	0	0	0	0
OTU1912	24	0	43	43	0	22	0	0	0	19	21	0	0	0	0	0	0	0	0	0	0	0	0	21	0	0	0	0	0	0	0	0	0	0	0	0	0	0	0	0	0	0	0	0	0	0	0	0	0
OTU1915	4	0	0	0	0	0	0	25	0	10	7	0	0	0	0	0	0	0	0	0	0	0	0	0	0	0	20	0	0	0	0	0	0	0	4	0	0	0	0	0	0	0	19	0	0	0	0	0	0
OTU1917	52	0	45	0	4	0	0	0	27	0	0	0	0	0	0	0	0	0	17	0	0	0	19	0	0	23	13	0	0	0	0	72	0	0	0	0	0	0	0	0	0	0	0	0	0	0	0	0	0
OTU1920	0	0	25	18	0	0	24	15	0	16	0	0	0	0	0	0	0	0	0	0	25	0	0	0	0	0	0	0	0	12	14	21	0	0	18	0	0	22	0	0	0	0	0	0	0	0	31	0	9
OTU1922	31	0	6	0	0	0	0	10	0	12	33	0	0	0	0	0	0	0	0	0	0	0	0	0	0	0	86	0	0	33	0	9	0	0	0	0	0	0	0	0	0	0	9	0	44	0	0	0	0
OTU193	28	0	26	28	0	0	0	261	257	0	321	0	0	0	0	0	0	0	0	0	0	0	0	0	0	0	0	0	0	0	0	0	0	0	0	0	0	0	0	0	0	0	0	0	0	0	0	0	0
OTU1933	0	0	0	0	0	0	0	0	0	0	0	0	0	0	0	81	0	64	0	39	35	0	0	0	0	0	0	0	0	0	0	0	0	0	0	0	0	0	0	0	0	0	0	0	32	0	0	0	0
OTU1936	61	0	63	0	15	0	0	13	0	0	0	30	72	25	0	0	8	0	0	0	0	0	0	0	0	0	0	0	0	0	0	0	0	0	0	0	0	0	0	0	0	0	0	0	0	0	0	0	0
OTU1938	0	0	0	0	22	0	0	0	0	0	0	57	70	41	60	0	25	55	0	40	0	0	0	59	70	0	0	0	9	0	0	36	0	0	0	0	0	0	0	36	40	0	0	0	0	0	0	0	0
OTU1939	0	0	0	0	29	17	0	0	0	0	0	0	0	0	0	17	0	10	0	0	0	0	0	0	39	0	0	0	52	0	0	60	0	86	0	69	0	24	0	46	79	0	0	0	0	24	17	131	0
OTU1945	0	0	15	0	11	42	22	0	7	6	0	0	17	18	12	0	0	0	9	0	20	0	6	0	0	0	0	20	0	0	8	51	0	34	0	57	0	0	0	0	0	0	0	0	0	0	0	0	0
OTU1947	21	0	14	27	0	0	0	0	0	43	0	0	0	0	0	0	0	0	57	0	49	0	14	0	0	0	0	35	0	0	0	34	36	0	67	0	42	0	62	0	0	0	53	0	0	0	0	0	0
OTU1951	29	0	66	59	0	0	0	16	19	32	0	0	0	0	0	0	0	0	0	0	0	0	0	0	0	0	0	0	0	0	0	0	0	0	0	0	0	0	0	0	0	0	0	0	0	0	0	0	0
OTU1953	0	0	0	0	0	0	0	0	0	0	0	0	0	0	0	0	0	0	0	0	0	0	0	0	0	0	0	0	0	0	0	0	0	0	0	0	0	0	0	0	15	0	0	0	0	0	0	9	0
OTU1956	0	0	0	0	0	0	0	0	0	0	0	0	0	0	11	0	0	0	0	0	0	0	0	0	0	16	0	99	0	0	13	0	0	0	0	0	0	15	0	0	0	0	0	0	0	0	0	0	0
OTU1958	0	0	24	0	0	0	0	19	0	0	0	0	0	0	0	0	0	0	35	0	0	0	0	0	0	26	0	19	0	0	0	0	25	0	0	0	0	0	0	0	0	0	0	0	0	0	0	0	0
OTU1962	63	0	223	76	55	40	0	0	0	0	0	0	0	0	0	42	0	0	0	0	0	0	0	0	0	0	0	0	0	0	0	0	0	0	0	0	0	0	0	0	0	0	0	0	0	0	0	0	0
OTU1963	0	0	0	0	18	0	0	0	0	0	0	47	48	0	0	40	38	0	0	23	0	0	0	30	0	0	0	0	19	0	0	0	0	0	0	0	0	0	0	19	28	0	0	0	0	0	0	0	0
OTU1966	13	0	17	17	0	0	0	8	8	10	0	0	0	0	0	0	0	0	13	0	12	24	0	0	0	6	0	0	0	0	0	0	0	0	0	0	0	0	0	0	0	0	0	0	0	0	0	0	0
OTU1967	0	0	12	39	33	46	0	0	0	0	0	15	0	31	40	39	0	0	0	0	0	0	0	0	0	0	0	0	0	0	0	0	0	0	0	0	0	0	0	0	0	0	0	0	0	0	0	0	0
OTU197	224	0	286	68	0	0	0	106	0	22	0	0	0	0	0	0	0	0	130	0	76	0	44	0	0	56	32	87	0	0	0	74	0	0	76	0	66	0	119	0	0	0	80	129	0	0	0	0	0
OTU1971	0	0	8	16	14	0	0	0	25	23	0	0	0	12	0	16	0	0	0	0	17	12	13	0	20	15	19	22	13	0	15	29	0	14	38	0	0	28	0	0	20	0	25	0	13	0	63	0	15
OTU1972	55	0	0	0	0	0	0	0	0	0	135	0	0	0	0	0	0	0	0	0	0	0	0	0	0	0	0	0	0	0	0	0	0	0	0	0	0	0	0	0	0	0	0	0	0	0	0	0	0
OTU1974	0	0	0	0	0	0	0	0	0	0	0	0	0	0	0	0	0	0	0	0	0	0	0	0	0	0	0	0	0	0	0	0	0	0	0	0	0	0	0	0	0	0	0	0	0	0	0	0	0
OTU1976	39	0	0	0	0	0	0	0	199	0	84	0	0	0	0	0	0	0	0	0	0	0	0	0	0	0	0	0	0	0	0	0	0	0	0	0	0	0	0	0	0	0	0	0	0	0	0	0	0
OTU1980	11	0	11	17	0	13	4	7	0	0	0	20	21	16	14	7	31	0	0	0	8	7	0	24	17	0	0	0	0	0	0	15	0	27	0	21	0	6	0	13	0	0	4	19	5	0	0	12	0
OTU1982	24	0	0	17	19	13	0	0	0	0	0	2	5	6	3	3	6	28	0	23	0	21	0	17	14	0	0	0	18	0	17	26	0	0	0	0	0	0	0	0	0	0	0	0	0	0	0	0	0
OTU1986	39	0	42	56	0	0	0	27	24	0	0	0	0	0	0	0	0	0	0	0	0	0	0	0	0	0	0	0	0	0	0	0	0	0	0	0	0	0	0	0	0	0	0	0	0	0	0	0	0
OTU1987	0	0	0	0	0	0	0	0	0	0	0	0	0	8	0	0	0	0	0	0	0	0	0	0	0	0	0	0	0	0	0	0	0	0	0	0	0	0	0	0	0	0	0	0	0	0	0	0	0
OTU1992	0	0	0	0	39	19	0	0	0	0	0	0	0	0	0	0	0	0	0	0	0	0	0	0	0	0	0	0	0	0	0	0	0	0	0	0	0	0	0	0	0	0	0	0	0	0	0	0	0
OTU1998	19	0	0	31	0	0	0	50	37	25	0	0	0	0	0	0	0	11	0	0	0	0	0	23	0	49	33	0	0	0	0	43	24	16	59	13	27	0	0	0	23	0	0	0	0	0	7	12	0
OTU2	0	0	0	44	45	0	0	0	127	0	0	0	0	0	0	0	80	0	0	0	0	143	0	0	0	0	0	0	40	0	0	93	0	190	0	139	0	65	43	0	0	0	439	0	0	112	174	120	0
OTU20	602	17	306	30	9	0	0	647	359	311	3222	0	15	25	0	0	0	19	357	11	67	76	0	54	0	1613	51	0	4794	0	0	23	0	0	0	0	0	0	0	0	0	0	0	0	0	0	0	0	0
OTU2001	0	0	0	0	0	0	0	0	0	0	0	0	0	0	0	0	0	0	8	0	9	0	12	0	0	9	0	0	13	0	10	19	0	0	0	0	0	0	0	0	0	0	0	0	40	0	0	0	0
OTU2004	0	0	0	0	0	0	0	0	0	0	0	0	10	20	0	0	18	0	0	0	0	6	0	0	0	0	0	0	0	0	0	5	0	9	0	16	0	11	0	8	0	0	0	0	16	0	0	0	0
OTU2005	24	0	0	28	0	0	0	0	0	0	0	0	0	0	0	0	0	0	25	0	12	0	0	0	0	13	0	0	0	0	0	0	0	0	0	0	0	0	0	0	0	0	0	0	0	0	0	0	0
OTU2009	11	5	0	50	0	0	0	13	0	0	0	0	0	0	0	0	0	0	25	0	9	0	9	0	0	23	18	0	13	24	0	16	0	0	0	0	0	0	0	0	0	0	0	0	0	0	0	0	0
OTU2016	30	0	27	64	0	0	0	0	0	0	0	0	0	0	0	0	0	0	0	0	0	0	0	0	0	28	0	26	0	0	0	17	0	0	20	0	0	0	0	0	0	0	0	0	0	0	0	0	0
OTU2018	0	0	0	0	0	0	0	0	0	0	0	7	12	9	11	8	12	10	0	0	0	0	0	22	12	0	0	0	14	0	0	0	0	6	0	8	0	4	0	0	0	0	0	0	8	11	0	10	0
OTU202	52	0	15	0	0	0	0	61	0	119	0	0	0	0	0	0	0	0	9	0	0	0	0	0	0	69	44	69	75	62	0	75	183	4	0	0	5	0	21	0	0	447	11	15	113	0	0	0	0
OTU2020	0	0	0	0	0	0	0	0	0	0	0	0	0	0	0	0	0	0	0	0	0	12	0	0	0	0	0	0	0	0	0	0	0	0	0	0	0	0	0	0	0	0	0	0	139	0	0	0	0
OTU2021	0	0	0	0	12	16	0	0	0	0	0	25	31	0	20	4	30	9	10	0	13	0	0	0	0	0	17	0	29	0	16	34	14	0	0	0	0	0	0	0	0	0	0	0	0	0	0	0	0
OTU2022	39	0	39	54	0	0	0	67	69	24	61	0	0	0	0	0	0	0	25	0	0	0	16	0	0	47	25	32	31	26	0	0	31	0	0	0	0	0	20	0	0	0	25	0	0	0	0	0	0
OTU2025	0	0	0	0	15	8	0	0	0	0	0	0	0	0	0	0	0	0	0	0	0	0	0	0	0	0	0	0	0	0	0	0	0	0	0	0	0	0	0	0	0	0	0	0	0	0	0	0	0
OTU2028	109	0	118	149	0	0	0	61	122	29	0	0	0	0	0	0	0	0	0	0	0	0	0	0	0	0	0	0	0	0	0	0	0	0	0	0	0	0	0	0	0	0	0	0	0	0	0	0	0
OTU2029	0	0	0	0	14	23	0	0	4	0	0	15	8	21	31	0	18	7	0	17	0	13	0	10	9	7	0	0	18	0	0	0	0	0	0	0	0	0	0	0	0	0	0	0	0	0	0	0	0
OTU203	20	8	51	82	110	59	33	28	38	47	0	31	13	32	54	47	98	51	54	17	98	11	80	67	48	20	11	15	81	7	59	208	9	136	8	82	0	54	0	67	82	0	0	0	0	0	0	3	0
OTU2030	18	0	35	9	0	0	5	4	0	0	0	0	0	0	0	9	13	0	14	0	10	0	0	0	4	0	0	0	0	0	0	20	5	7	0	7	0	0	0	6	11	0	0	0	0	0	0	0	0
OTU2031	0	0	0	0	49	45	0	0	0	0	0	42	22	0	47	39	0	0	0	0	0	0	0	0	0	0	0	0	0	0	0	0	0	0	0	0	0	0	0	0	0	0	0	0	0	0	0	0	0
OTU2034	0	0	0	0	41	0	0	0	0	0	0	30	20	22	0	0	0	0	0	0	0	0	0	0	0	0	0	0	0	0	0	37	0	77	0	96	0	137	0	50	0	0	0	0	15	0	0	41	34
OTU2035	0	0	17	24	0	0	0	0	0	0	0	0	19	0	0	0	14	0	0	0	0	0	0	0	0	0	0	0	0	0	0	15	0	0	25	0	28	0	20	0	0	0	0	12	34	0	0	0	36
OTU2040	0	0	0	37	0	0	0	23	0	0	27	0	0	0	0	0	0	0	29	0	0	0	0	0	0	14	0	0	0	0	0	0	0	0	40	0	15	0	0	0	0	0	17	0	27	3	0	0	0
OTU2045	0	0	0	0	0	0	0	0	0	0	0	0	0	0	0	0	0	0	0	0	0	0	0	0	0	0	0	0	0	0	0	0	0	0	0	0	0	0	0	0	0	0	0	0	0	0	0	0	0
OTU2046	0	0	0	0	25	0	0	0	0	0	0	29	20	0	0	0	0	51	0	41	0	5	0	28	0	0	0	0	71	0	26	39	0	24	0	0	0	0	0	39	28	0	0	0	0	0	0	0	0
OTU2047	76	0	90	56	27	44	0	0	0	36	0	0	0	0	0	0	35	0	0	0	0	0	0	0	0	0	0	0	0	0	0	0	0	0	0	0	0	0	0	0	0	0	0	0	0	0	0	0	0
OTU2049	52	0	32	37	0	0	0	25	32	0	0	0	0	0	0	0	0	0	0	0	0	0	0	0	0	0	0	0	0	0	0	0	0	0	0	0	0	0	0	0	0	0	0	0	0	0	0	0	0
OTU205	0	0	0	0	0	0	0	0	0	0	0	4	11	0	0	0	11	0	0	0	0	211	0	0	0	0	0	0	12	0	10	57	0	9	0	0	0	180	0	0	0	0	0	0	74	11	333	0	0
OTU2050	0	0	0	0	0	0	0	0	0	0	0	62	38	0	156	63	141	74	0	47	0	0	0	0	81	0	0	0	23	0	0	0	0	100	0	110	0	103	0	0	0	0	0	0	0	0	0	0	0
OTU2056	0	10	0	0	18	20	0	0	0	0	0	41	31	10	15	12	10	22	0	15	0	10	0	33	47	0	0	0	28	0	0	0	0	0	0	0	0	0	0	0	0	0	0	0	0	0	0	0	0
OTU2057	0	0	0	0	0	0	0	0	0	0	0	0	0	0	0	0	0	0	0	0	0	0	0	0	0	0	0	0	0	0	0	0	0	0	0	0	0	0	0	0	0	0	0	0	0	0	0	0	0
OTU2063	42	0	24	0	19	0	0	54	0	0	0	11	14	39	0	0	60	0	0	0	0	0	0	0	0	0	0	0	0	0	0	0	0	0	0	0	0	0	0	0	0	0	0	0	0	0	0	0	0
OTU2069	0	0	0	0	0	0	0	0	0	0	0	45	0	59	0	0	0	0	0	0	0	33	0	0	26	0	0	0	0	0	0	0	0	0	0	0	0	0	0	0	0	0	0	0	0	0	0	0	0
OTU2071	0	0	0	0	0	0	0	0	0	0	0	0	0	0	0	0	0	0	120	0	73	0	167	0	0	0	19	39	0	0	50	42	0	0	0	0	0	0	0	0	0	0	0	0	0	0	0	0	0
OTU2072	14	0	4	8	4	0	0	0	0	0	0	0	0	0	6	0	0	0	13	0	4	0	14	0	0	6	0	26	0	7	0	12	3	3	0	0	0	4	0	0	0	0	0	0	0	0	0	0	0
OTU2076	0	0	0	0	0	0	0	24	0	0	47	0	0	0	0	0	0	0	0	0	0	0	0	0	0	0	0	0	0	0	0	0	0	0	0	0	0	0	0	0	0	0	0	0	0	0	0	0	0
OTU2077	0	0	0	0	0	0	0	0	0	0	0	0	0	0	0	0	0	0	0	0	0	0	0	0	0	0	0	0	0	0	0	0	0	0	0	0	0	0	0	0	0	0	0	0	0	0	0	0	0
OTU2079	0	0	0	21	0	0	11	0	0	0	0	14	0	18	12	13	20	15	28	0	38	10	0	11	14	10	0	0	0	0	15	23	0	30	0	26	0	20	17	0	29	0	16	0	0	0	16	28	19
OTU208	127	0	145	221	0	0	0	84	163	187	0	0	0	0	0	0	0	0	127	0	89	0	159	0	0	157	172	152	0	62	0	21	21	0	41	0	29	0	36	0	0	18	88	7	0	0	0	0	0
OTU2081	10	0	13	0	0	0	0	0	0	8	0	0	0	0	0	0	0	0	12	0	0	0	5	0	0	13	17	0	0	0	0	16	0	0	5	0	0	0	8	0	0	0	9	144	0	0	0	0	0
OTU2084	0	18	0	0	23	42	0	0	0	0	0	0	0	0	0	0	162	0	0	0	0	0	0	0	0	0	0	0	0	0	0	0	0	0	0	0	0	0	0	0	0	0	0	0	0	0	0	0	0
OTU2086	0	17	0	0	0	0	0	0	0	0	39	0	0	0	0	0	0	0	0	0	0	0	0	0	0	0	0	0	0	0	0	0	0	0	0	0	0	0	0	0	0	0	0	0	0	0	0	0	0
OTU2089	0	19	0	0	31	28	0	0	0	0	0	29	0	0	37	0	0	0	0	0	0	0	0	0	0	0	0	0	0	0	0	0	0	0	0	0	0	0	0	0	0	0	0	0	0	0	0	0	0
OTU2091	0	0	0	0	14	10	0	0	0	0	0	6	6	10	10	10	61	12	0	8	0	0	0	20	0	0	0	0	25	0	8	90	0	20	0	16	0	11	0	0	0	0	0	0	0	6	0	20	47
OTU2098	0	0	0	0	0	0	0	0	0	0	0	0	0	0	0	0	0	0	0	0	0	0	0	0	0	0	0	0	0	0	0	0	0	0	0	0	0	0	0	0	0	0	0	0	0	0	0	0	0
OTU2099	0	10	0	0	47	17	0	0	0	0	0	48	46	47	29	44	5	0	0	0	0	0	0	0	19	0	0	0	21	0	0	0	0	0	0	0	0	0	0	0	0	0	0	0	0	0	0	0	0
OTU21	74	45	55	87	57	84	18	76	42	42	46	101	224	424	133	0	365	71	49	86	46	568	65	67	35	60	32	64	216	43	178	258	0	177	125	173	111	160	150	82	195	0	86	1241	627	95	273	166	33
OTU2100	0	0	0	0	0	0	0	0	0	0	0	90	27	7	0	0	0	786	0	147	0	0	0	79	0	0	0	0	0	0	0	0	0	0	0	0	0	0	0	0	0	0	0	0	0	0	0	0	0
OTU2102	0	0	0	0	58	55	0	0	0	0	0	35	0	0	214	48	0	165	0	76	0	46	0	308	0	0	0	0	0	0	0	0	0	0	0	0	0	0	0	0	0	0	0	0	0	0	0	0	0
OTU2104	26	0	11	24	11	0	0	13	29	0	6	0	0	16	0	0	0	0	0	0	0	0	0	0	6	0	0	0	0	0	0	0	0	0	0	0	0	0	0	0	0	0	0	0	0	0	0	0	0
OTU2105	0	0	0	0	0	0	0	0	0	0	0	0	0	0	0	0	0	0	0	0	0	0	0	0	0	0	0	0	0	0	0	0	0	0	0	0	0	0	0	0	0	0	0	0	0	0	0	0	0
OTU2110	0	0	33	0	0	0	0	0	0	0	0	30	43	84	21	0	481	0	0	0	0	0	0	0	0	0	0	0	0	0	0	0	0	0	0	0	0	0	0	0	0	0	0	0	0	0	0	0	0
OTU2111	0	1027	0	0	3	65	0	0	0	0	0	6	14	5	5	0	0	0	0	0	0	0	0	0	0	0	0	0	0	0	0	0	0	0	0	0	0	0	0	0	0	0	0	0	0	0	0	0	0
OTU2114	67	0	77	89	0	0	0	38	21	93	0	0	0	0	0	0	0	0	0	0	0	0	0	0	0	0	0	0	0	0	0	0	0	0	0	0	0	0	0	0	0	0	0	0	0	0	0	0	0
OTU2115	0	0	0	0	11	0	0	0	0	0	0	32	47	95	49	0	25	26	0	31	0	30	0	45	0	0	0	0	4	0	48	31	0	61	0	47	0	31	0	92	0	0	0	0	0	13	0	284	0
OTU2117	0	0	0	0	0	0	0	0	0	0	0	0	0	0	0	0	0	0	0	0	0	0	0	0	0	0	0	0	0	0	0	0	0	0	0	0	0	0	0	0	0	0	0	0	0	0	0	0	0
OTU2120	0	5	17	6	24	19	0	0	0	0	0	21	13	15	19	25	20	0	0	0	0	0	0	0	0	0	0	0	0	0	0	0	0	0	0	0	0	0	0	0	0	0	0	0	0	0	0	0	0
OTU2122	0	0	0	0	0	0	0	0	0	0	0	24	48	43	0	0	99	0	0	0	0	0	0	0	0	0	0	0	0	0	0	27	0	129	0	123	0	118	0	70	0	0	0	0	0	0	0	0	0
OTU2123	0	7	0	0	9	0	8	0	0	0	0	0	19	14	0	13	16	5	0	0	0	0	0	11	7	0	0	0	7	0	0	28	0	9	0	3	0	13	0	0	11	0	0	0	0	6	8	6	16
OTU2124	0	0	0	0	0	0	0	0	0	0	0	0	8	0	0	5	10	0	0	0	0	0	0	0	0	0	0	0	5	0	4	0	0	0	0	0	0	0	0	0	0	0	0	0	0	0	0	0	0
OTU2125	0	0	0	0	0	0	0	13	0	19	0	0	0	0	0	0	8	0	0	4	0	0	0	0	0	154	0	0	5	0	0	0	0	0	0	0	0	0	0	0	0	0	0	0	0	0	0	0	0
OTU2128	0	0	0	0	0	0	0	0	0	0	0	0	0	0	0	0	0	0	6	0	5	0	0	0	0	0	0	0	0	0	0	7	0	0	0	0	0	0	0	0	0	0	0	28	0	0	0	0	0
OTU2129	0	0	0	0	0	0	0	0	0	0	0	0	0	0	0	0	0	0	0	0	0	0	0	9	0	0	0	0	0	0	0	0	0	31	0	104	0	0	0	0	24	0	0	0	0	0	0	0	0
OTU2132	12	0	17	18	13	0	0	0	0	9	0	17	17	23	0	0	0	0	0	0	0	0	0	0	0	0	0	0	0	0	0	0	0	0	0	0	0	0	0	0	0	0	0	0	0	0	0	0	0
OTU2136	0	0	0	0	9	0	0	0	0	0	0	0	0	4	0	0	21	0	0	0	0	0	0	0	0	0	0	0	0	0	0	0	0	0	0	0	0	0	0	0	13	0	0	0	10	0	0	8	7
OTU2138	0	0	0	0	0	0	0	0	0	0	0	0	0	0	0	0	0	0	0	0	0	0	0	0	0	0	0	0	0	0	0	0	0	0	0	0	0	0	0	0	0	0	0	0	0	0	0	0	0
OTU2139	0	0	0	0	0	16	0	0	0	0	0	0	4	0	3	0	0	0	0	0	0	0	0	0	5	0	0	0	0	0	0	0	0	0	0	0	0	0	0	0	0	0	0	0	0	0	0	0	0
OTU2147	0	6	0	0	0	0	0	0	0	0	10	0	0	0	0	0	0	0	0	0	0	0	0	0	0	0	0	0	33	153	0	61	0	0	0	0	0	0	0	0	0	16	0	0	0	0	0	0	0
OTU2149	53	0	47	0	0	0	0	24	15	30	0	0	0	0	0	0	0	0	0	0	0	0	0	0	0	0	0	0	0	0	0	0	0	0	0	0	0	0	0	0	0	0	0	0	0	0	0	0	0
OTU215	17	0	9	34	0	4	0	8	11	0	0	0	0	0	0	0	12	0	12	0	0	0	9	0	0	0	0	0	0	0	0	33	0	18	35	14	25	8	33	18	20	0	35	168	30	0	7	16	0
OTU2150	0	0	0	0	17	18	0	0	0	0	0	0	0	0	0	0	0	14	0	9	0	36	0	0	13	0	0	0	0	0	0	50	0	75	0	80	0	84	0	40	61	0	0	0	10	14	12	29	0
OTU2151	0	0	19	44	0	0	0	0	21	0	0	0	0	0	0	0	0	0	0	0	0	0	0	0	0	0	0	0	0	0	0	0	0	0	0	0	0	0	0	0	0	0	0	0	0	0	0	0	0
OTU2154	17	0	0	21	10	11	0	0	15	0	0	17	0	41	0	22	222	0	0	0	0	0	0	0	0	0	0	0	0	0	0	0	0	0	0	0	0	0	0	0	0	0	0	0	0	0	0	0	0
OTU2162	0	0	0	0	0	0	0	0	0	0	0	0	0	0	0	24	0	0	0	0	0	119	0	0	0	0	0	0	0	0	0	0	0	30	0	0	0	50	0	23	0	0	0	0	0	0	0	0	11
OTU2166	0	0	23	0	0	0	0	49	7	14	0	0	0	0	0	0	18	0	0	0	0	0	0	6	0	6	0	0	0	0	0	58	0	0	10	0	18	47	0	10	9	0	0	0	0	0	14	24	19
OTU2177	0	0	0	0	0	0	0	0	0	0	57	0	0	0	0	0	0	0	32	0	0	0	0	0	0	0	29	0	0	0	0	50	0	0	71	0	39	0	29	0	0	32	68	0	0	0	0	0	0
OTU2178	0	0	0	0	0	0	0	0	0	0	0	0	0	0	150	120	0	0	0	0	0	0	0	0	0	0	0	0	0	0	0	0	0	0	0	0	0	0	0	0	0	0	0	0	0	0	0	0	0
OTU218	29	0	33	56	0	0	7	31	51	26	0	0	0	0	0	0	0	0	37	0	30	14	46	0	0	27	31	27	32	0	31	151	0	0	20	0	5	33	7	0	11	0	35	1497	158	0	0	0	25
OTU2183	23	0	20	40	0	0	0	30	15	16	0	0	0	0	0	0	0	0	16	0	0	0	23	0	0	47	29	38	0	0	0	42	10	0	35	0	38	0	28	0	0	0	33	0	0	0	0	0	0
OTU2189	28	0	42	0	0	0	0	0	0	17	0	0	0	0	0	0	0	0	0	0	55	0	19	0	0	0	5	22	0	0	0	28	0	0	90	0	72	0	43	0	0	0	0	0	0	0	0	0	34
OTU219	243	0	75	351	0	0	0	243	387	262	37	0	0	0	0	0	0	0	98	0	21	0	440	0	0	205	356	119	330	0	0	0	0	0	0	0	0	0	0	0	0	0	0	0	0	0	0	0	0
OTU2190	51	0	62	0	45	33	0	0	33	23	0	0	0	0	0	39	0	0	0	0	0	0	0	0	0	0	0	0	0	0	0	0	0	0	0	0	0	0	0	0	0	0	0	0	0	0	0	0	0
OTU2191	0	0	0	0	0	7	9	0	0	0	0	0	30	40	12	0	28	10	0	4	0	7	0	10	0	0	0	0	41	0	21	40	0	81	0	92	0	75	0	31	31	0	0	0	0	0	0	0	0
OTU2204	0	0	0	0	62	34	0	0	0	0	0	52	26	0	76	8	275	0	0	0	0	0	0	0	0	0	0	0	0	0	0	0	0	0	0	0	0	0	0	0	0	0	0	0	0	0	0	0	0
OTU221	0	0	0	0	0	0	0	0	0	0	0	0	0	0	0	0	0	0	0	0	0	0	0	0	0	0	0	0	41	0	0	0	0	0	0	0	0	0	0	0	0	0	0	0	351	0	0	0	0
OTU2210	38	0	0	0	0	0	0	12	0	0	0	0	0	0	0	0	0	9	15	8	13	33	15	0	0	0	0	0	0	0	0	10	0	0	0	0	0	0	0	0	0	0	0	0	0	0	0	0	0
OTU2211	0	0	0	0	0	0	0	0	0	0	0	69	74	87	0	0	48	0	0	0	0	0	0	73	0	0	0	0	45	0	0	28	0	0	27	0	36	0	23	0	22	0	24	0	0	0	17	30	0
OTU2214	0	0	0	0	37	0	15	0	0	0	0	0	0	0	0	0	0	36	0	23	0	0	0	13	0	0	0	0	0	0	0	0	0	53	0	51	0	6	0	64	0	0	0	0	0	0	0	0	0
OTU2216	55	0	80	146	14	0	0	17	70	74	48	0	0	0	0	0	0	0	0	0	0	0	0	0	0	0	0	0	0	0	0	0	0	0	0	0	0	0	0	0	0	0	0	0	0	0	0	0	0
OTU2218	0	39	0	0	27	43	0	0	0	0	0	33	0	0	0	35	44	0	0	0	0	0	0	0	0	0	0	0	0	0	0	0	0	0	0	0	0	0	0	0	0	0	0	0	0	0	0	0	0
OTU2222	0	0	0	0	6	15	0	0	0	0	0	0	0	0	25	36	0	0	0	0	0	0	0	0	0	0	0	0	0	0	0	0	0	0	0	0	0	0	0	0	0	0	0	0	0	0	0	0	0
OTU2224	64	0	29	14	0	0	0	31	27	0	0	0	0	0	0	0	0	0	0	0	0	0	0	0	0	0	0	0	0	0	0	0	0	0	0	0	0	0	0	0	0	0	0	0	0	0	0	0	0
OTU2225	0	0	0	0	0	0	0	0	0	0	0	0	0	0	0	0	0	0	0	0	0	0	0	0	0	0	0	0	0	0	0	0	0	0	0	20	0	28	0	0	0	0	0	0	169	0	0	18	0
OTU2228	0	0	0	0	14	7	0	0	0	0	0	0	0	0	20	13	0	0	0	0	0	0	0	19	0	0	0	0	0	0	21	0	0	0	0	0	0	0	0	0	0	0	0	0	0	0	0	0	0
OTU2229	0	0	0	0	12	15	0	0	0	0	0	18	0	0	32	0	0	0	0	0	0	0	0	0	0	0	0	0	0	0	0	0	0	0	0	0	0	0	0	0	0	0	0	0	0	0	0	0	0
OTU2230	32	0	42	42	0	0	0	0	6	0	0	0	0	0	0	0	0	0	19	0	27	0	10	0	0	12	0	0	7	0	0	16	0	19	17	16	11	19	15	10	0	0	24	0	9	0	0	0	0
OTU2233	52	0	83	47	26	12	0	17	0	14	0	0	0	0	21	0	0	0	0	0	0	0	0	0	0	0	0	0	0	0	0	0	0	0	0	0	0	0	0	0	0	0	0	0	0	0	0	0	0
OTU2235	45	0	14	39	0	0	0	45	57	40	0	0	0	0	0	0	0	0	26	0	0	0	113	0	0	25	17	24	39	0	0	0	0	0	0	0	0	0	0	0	0	0	0	0	0	0	0	0	0
OTU2236	0	0	0	0	34	0	0	0	0	0	0	0	0	0	0	0	0	0	0	0	0	0	0	0	0	0	0	0	0	0	0	0	0	0	0	0	0	0	0	0	0	0	0	0	0	0	0	0	0
OTU2239	0	0	0	0	22	0	0	0	0	0	0	34	32	38	33	0	35	38	0	0	0	7	0	32	21	0	0	0	35	0	14	16	0	17	0	28	0	0	0	29	64	0	0	0	0	0	11	66	10
OTU2242	0	0	0	96	0	0	0	74	56	0	0	0	0	0	0	0	0	0	0	0	0	0	0	0	0	0	0	0	0	0	0	0	0	0	0	0	0	0	0	0	0	0	0	0	0	0	0	0	0
OTU2245	61	0	0	57	0	0	0	0	23	0	0	0	0	0	0	0	0	0	0	0	0	0	0	0	0	0	0	0	0	0	0	0	0	0	0	0	0	0	0	0	0	0	0	0	0	0	0	0	0
OTU2246	15	30	25	49	0	0	0	0	24	26	26	0	0	0	15	0	0	0	0	0	0	0	0	0	0	0	0	0	0	0	0	0	0	0	0	0	0	0	0	0	0	0	0	0	0	0	0	0	0
OTU2248	0	0	0	0	6	0	0	0	0	0	0	15	0	9	16	0	18	20	0	11	0	0	0	14	7	0	0	0	0	0	0	0	0	9	0	21	0	0	0	21	8	0	0	0	0	0	0	29	30
OTU2250	58	0	59	0	0	0	0	0	0	0	0	0	0	0	0	0	0	0	25	0	0	0	0	0	0	32	13	29	0	0	34	58	0	0	53	0	0	0	0	0	0	0	49	0	0	0	0	0	0
OTU2251	0	0	0	0	37	0	17	0	0	0	0	0	0	0	0	0	0	32	0	0	0	0	0	26	0	0	0	0	0	0	0	68	0	46	0	47	0	55	0	0	52	0	0	0	0	0	0	0	0
OTU2252	38	0	0	0	0	0	0	11	0	0	26	0	0	0	0	0	0	0	0	0	0	0	0	0	0	0	0	0	0	0	0	0	0	0	0	0	0	0	0	0	0	0	0	0	0	0	0	0	0
OTU2255	0	35	0	0	0	269	0	0	0	0	204	0	0	0	0	0	0	0	0	0	0	26	0	0	0	0	0	0	81	0	0	0	0	0	0	0	0	0	0	0	0	0	0	0	0	0	0	0	0
OTU2258	0	0	23	19	0	0	0	0	13	17	0	0	0	0	0	17	0	0	0	0	0	0	0	0	0	0	0	0	0	0	0	0	0	0	0	0	0	0	0	0	0	0	0	0	0	0	0	0	0
OTU226	112	0	126	121	17	34	0	72	120	70	69	0	13	5	0	0	0	0	0	0	0	0	0	0	0	0	0	0	0	0	0	0	0	0	0	0	0	0	0	0	0	0	0	0	0	0	0	0	0
OTU2263	25	0	38	37	0	0	0	0	0	0	0	0	0	0	0	0	0	0	17	0	0	0	0	0	0	0	0	35	0	0	0	15	0	0	23	0	0	0	25	0	0	0	21	38	0	0	0	0	0
OTU2264	0	0	67	48	0	0	0	67	33	0	0	0	0	0	0	0	0	0	0	0	0	0	0	0	0	0	0	0	0	0	0	0	0	0	0	0	0	0	0	0	0	0	0	0	0	0	0	0	0
OTU2266	0	0	0	0	0	0	0	0	0	0	0	0	0	0	0	0	0	0	0	0	0	0	0	0	0	6	0	0	0	8	0	0	0	0	0	0	0	0	0	0	0	0	24	33	0	0	0	0	0
OTU2268	38	0	42	31	0	0	0	30	0	29	4	0	0	0	0	0	0	0	0	0	0	0	0	0	0	0	0	0	0	0	0	0	0	0	0	0	0	0	0	0	0	0	0	0	0	0	0	0	0
OTU227	12	0	18	27	0	0	0	23	17	0	0	0	0	0	0	0	0	0	16	0	23	0	21	0	0	13	16	13	0	0	0	57	0	0	38	0	33	19	30	0	0	0	36	270	97	0	0	0	0
OTU2281	6	0	0	0	0	0	0	18	0	0	0	0	0	0	0	0	0	0	14	0	0	0	0	0	0	13	6	28	0	0	0	0	0	0	19	0	18	0	0	0	0	0	0	0	0	0	0	0	0
OTU2290	0	0	0	0	0	0	46	0	0	0	0	0	0	0	0	0	42	0	0	0	0	0	0	0	0	0	0	0	0	0	0	0	0	0	0	0	0	0	0	0	0	0	0	0	0	0	0	0	34
OTU2292	0	0	26	0	0	0	0	0	0	58	0	0	0	0	0	0	0	0	0	0	0	0	0	0	0	0	0	0	0	0	0	32	0	0	94	0	58	0	20	0	0	0	0	352	0	0	0	0	0
OTU2294	0	0	0	0	0	0	0	0	0	0	0	0	0	0	0	0	0	0	0	0	0	0	0	0	0	0	0	0	0	0	0	0	0	0	0	0	0	0	0	0	0	0	0	0	0	0	0	0	0
OTU23	0	251	0	0	0	0	0	0	0	0	0	0	0	0	0	0	0	0	0	0	0	0	0	0	0	0	0	0	0	0	0	0	0	0	0	0	0	0	0	0	0	0	0	0	0	0	0	0	0
OTU2300	36	0	17	11	0	0	0	30	46	0	40	0	0	0	0	0	0	0	0	0	0	0	0	0	0	0	0	0	0	0	0	0	0	0	0	0	0	0	0	0	0	0	0	0	0	0	0	0	0
OTU2302	0	0	0	0	0	0	0	0	0	0	0	0	0	0	13	0	0	0	9	0	7	7	0	0	0	0	0	0	0	0	5	8	0	0	0	0	0	0	5	0	0	0	0	36	35	0	0	0	0
OTU2304	0	0	0	0	0	0	0	0	0	0	0	61	52	38	0	56	0	0	0	0	0	0	0	15	68	0	0	0	0	0	0	0	0	0	0	0	0	0	0	0	0	0	0	0	0	0	0	0	0
OTU2309	0	0	0	0	0	0	0	0	0	0	0	0	0	0	0	0	0	0	0	0	0	0	0	0	0	0	0	0	29	0	0	0	0	70	0	0	0	0	0	0	34	0	0	0	0	0	0	0	21
OTU231	0	0	0	0	64	51	0	0	0	0	0	0	0	0	0	0	0	0	0	0	0	0	0	0	0	0	0	0	0	0	0	0	0	0	0	0	0	0	0	0	0	0	0	0	0	0	0	0	0
OTU2310	0	0	0	0	0	0	0	43	81	0	0	0	0	0	0	0	0	0	0	0	0	0	0	0	0	64	96	0	72	64	0	0	95	0	0	0	0	0	0	0	0	0	0	0	0	0	0	0	0
OTU2312	0	107	0	0	170	16	0	0	0	0	24	0	0	0	0	0	0	0	0	0	0	0	0	0	0	0	0	0	0	0	0	0	0	0	0	0	0	0	0	0	0	0	0	0	0	0	0	0	0
OTU2314	0	3	0	0	11	0	0	0	0	0	0	0	0	0	0	0	0	0	0	0	0	0	0	0	0	0	0	0	0	0	0	0	0	0	0	0	0	0	0	0	0	0	0	0	0	0	0	0	0
OTU232	110	0	120	265	0	0	0	69	141	111	80	0	0	0	0	0	0	0	91	0	82	99	106	0	0	0	0	102	66	0	0	126	0	66	0	0	0	0	0	0	0	0	0	0	0	0	0	0	0
OTU2320	0	0	0	0	0	17	11	0	0	0	0	0	0	0	0	0	0	0	6	0	0	0	0	0	0	0	0	0	0	0	103	40	0	0	0	0	0	0	0	0	0	0	0	0	0	0	0	0	0
OTU2324	19	0	35	19	11	15	0	0	7	6	0	0	15	10	0	0	78	0	0	0	0	0	0	0	0	0	0	0	0	0	0	0	0	0	0	11	0	20	0	20	0	0	0	0	0	0	0	0	0
OTU2329	0	0	0	0	0	0	0	0	0	0	0	36	0	12	0	0	33	14	0	0	0	0	0	0	32	0	0	0	0	0	0	17	0	11	0	0	0	0	0	0	0	0	0	0	0	0	0	29	0
OTU2336	3	0	0	8	0	0	0	0	0	0	0	0	0	0	0	0	0	0	0	0	0	0	0	0	0	0	0	0	0	0	0	0	0	7	0	11	0	0	0	0	0	0	0	12	11	0	0	0	0
OTU2338	0	0	0	0	27	53	0	0	0	0	0	0	0	14	0	0	29	0	0	28	0	0	0	0	0	0	0	0	26	0	0	69	0	0	0	0	0	26	0	69	0	0	0	0	0	0	0	0	28
OTU2339	0	0	0	0	0	0	0	0	0	0	0	0	0	0	0	0	0	0	0	0	0	0	0	0	0	0	0	0	0	0	0	0	0	0	0	0	0	0	0	0	0	0	0	0	0	0	0	0	0
OTU234	30	19	50	38	67	105	0	0	0	0	0	78	98	0	107	0	86	0	0	0	0	0	20	78	86	17	0	0	124	0	64	165	0	62	0	68	0	56	0	103	110	0	0	0	0	0	0	0	0
OTU2343	26	0	0	0	15	0	0	0	0	0	0	0	0	0	0	0	0	0	0	0	45	0	28	0	0	0	0	48	0	0	0	0	5	0	0	0	0	0	0	0	0	0	0	0	0	0	0	0	0
OTU2346	0	0	0	0	15	0	0	0	0	14	10	0	0	0	0	0	0	0	0	0	0	0	0	0	0	0	0	83	28	0	0	55	0	0	0	0	0	0	0	0	0	0	0	0	0	0	0	0	0
OTU2348	0	0	0	110	0	0	0	0	0	0	0	0	0	0	0	0	0	0	0	0	0	69	0	0	0	0	0	0	0	0	0	0	0	0	0	0	0	0	0	0	0	0	0	0	0	0	0	0	0
OTU2351	30	12	45	66	49	19	0	36	0	0	5	0	0	0	0	0	0	0	0	0	0	0	0	0	0	0	0	0	0	0	0	0	0	0	0	0	0	0	0	0	0	0	0	0	0	0	0	0	0
OTU2355	0	11	15	26	15	12	0	0	0	0	0	0	9	30	0	18	27	0	0	0	0	0	0	0	0	0	0	0	0	0	0	0	0	0	0	0	0	0	0	0	0	0	0	0	0	0	0	0	0
OTU2357	30	0	23	32	0	7	0	15	12	27	12	7	5	7	8	0	0	0	0	0	0	0	0	0	0	0	0	0	0	0	0	0	0	0	0	0	0	0	0	0	0	0	0	0	0	0	0	0	0
OTU2361	16	0	0	0	0	0	0	43	0	64	118	0	0	0	0	0	0	0	0	0	0	0	0	0	0	28	49	29	116	0	0	0	38	0	0	0	0	0	0	0	0	0	0	0	76	0	0	0	0
OTU2363	0	0	0	0	19	0	0	0	0	0	0	0	0	0	0	0	0	0	0	0	0	0	0	0	0	0	0	0	0	0	0	0	0	0	0	0	0	0	0	0	0	0	0	0	0	0	0	0	0
OTU2364	0	0	0	0	0	0	0	0	0	0	0	0	0	0	0	0	0	0	0	0	0	0	0	0	0	0	0	0	0	0	0	0	0	0	0	0	0	0	0	0	0	0	0	0	0	0	0	0	0
OTU2366	0	0	0	0	61	24	9	0	0	0	20	0	0	0	0	0	0	0	0	0	0	0	0	0	0	0	0	0	0	0	135	77	0	45	0	27	0	64	0	0	9	0	0	0	0	0	0	10	0
OTU2367	0	0	0	0	0	0	0	0	0	0	0	103	134	93	47	96	39	50	0	47	0	26	0	24	83	0	0	0	10	0	13	20	0	12	0	20	0	11	0	10	31	0	0	0	0	15	22	22	0
OTU2368	0	0	0	0	0	0	0	0	0	0	0	56	126	140	0	0	0	0	0	0	0	0	0	0	0	0	0	0	0	2	0	0	0	0	0	0	0	0	0	0	0	0	0	0	0	0	0	0	0
OTU237	0	0	0	0	0	0	0	0	0	11	0	0	66	0	0	0	0	0	0	0	0	0	0	0	0	0	0	0	0	0	0	0	0	0	0	0	0	0	0	0	0	0	0	0	0	0	0	0	0
OTU2370	0	0	0	0	0	0	0	0	0	0	0	0	0	0	0	0	198	0	0	0	14	29	18	22	0	30	0	0	0	0	0	173	0	0	0	0	0	8	0	0	0	0	0	0	0	0	10	9	0
OTU2371	25	0	12	73	0	0	0	19	33	28	0	0	0	0	0	0	0	0	0	0	0	0	19	0	0	19	18	0	0	0	0	0	0	0	0	0	0	0	0	0	0	0	0	0	0	0	0	0	0
OTU2375	0	0	0	0	27	10	5	0	0	0	0	29	24	17	22	25	0	23	0	0	0	0	0	25	25	0	0	0	21	0	19	31	0	20	0	20	0	7	0	25	24	0	0	0	0	11	0	28	23
OTU2379	0	0	0	0	43	68	0	0	0	0	0	47	68	33	69	74	63	0	0	0	0	0	0	0	0	0	0	0	0	0	0	0	0	0	0	0	0	0	0	0	0	0	0	0	0	0	0	0	0
OTU2383	0	0	0	0	0	3	0	0	0	0	0	4	3	0	458	85	0	0	0	0	0	0	0	0	0	0	0	0	0	0	0	0	0	0	0	0	0	0	0	0	0	0	0	0	0	0	0	0	0
OTU2384	4	0	0	0	0	0	0	0	0	0	0	0	0	0	0	0	0	0	0	0	4	0	0	0	0	0	0	0	0	0	0	0	0	0	0	0	0	0	0	0	0	0	0	21	12	0	0	0	0
OTU2388	0	0	0	0	16	12	0	0	0	0	0	25	26	0	0	0	0	0	0	0	0	0	0	0	0	0	0	0	0	0	0	0	0	0	0	0	0	0	0	0	0	0	0	0	0	0	0	0	0
OTU2389	59	0	99	59	0	0	0	54	0	40	0	0	0	0	0	0	0	0	0	0	0	0	0	0	0	0	0	0	0	0	0	0	0	0	0	0	0	0	0	0	0	0	0	0	0	0	0	0	0
OTU2392	0	9	0	0	11	9	0	0	0	0	0	0	0	0	0	0	0	0	0	0	0	0	0	0	0	0	0	0	0	0	0	0	0	0	0	0	0	0	0	0	0	0	0	0	0	0	0	0	0
OTU24	0	0	0	0	0	0	0	0	0	0	0	4	6	8	0	21	0	17	0	14	0	0	0	43	11	0	0	0	0	0	0	0	0	0	0	0	0	0	0	0	0	0	0	0	0	0	0	0	0
OTU2400	25	0	11	13	0	0	0	27	0	27	0	0	0	0	0	0	0	0	19	0	11	0	10	0	0	14	0	13	0	0	0	13	0	0	0	0	0	7	0	0	0	0	0	0	0	0	0	0	0
OTU241	0	0	0	0	446	110	0	0	0	0	3	100	0	0	104	582	0	0	0	0	0	0	0	0	0	0	0	0	0	0	0	0	0	0	0	0	0	0	0	0	0	0	0	0	0	0	0	0	0
OTU2412	0	0	0	0	0	0	0	0	0	0	0	0	0	0	0	0	0	0	0	0	0	0	0	0	0	0	0	0	52	19	0	21	4	0	4	0	0	0	0	0	0	37	0	202	6	0	0	0	0
OTU2413	0	0	26	42	0	0	0	0	13	0	0	0	0	0	0	0	0	0	52	0	36	0	22	0	0	0	0	0	17	0	0	43	0	0	25	0	0	0	0	0	0	0	24	29	0	0	0	26	0
OTU2415	29	0	0	15	10	24	0	16	20	46	0	0	0	19	0	0	0	17	23	0	0	10	0	0	0	24	6	28	0	21	14	27	12	26	0	24	0	22	0	20	20	0	0	0	0	0	0	0	0
OTU2416	0	0	0	0	39	0	0	12	0	0	0	0	0	0	48	81	0	0	0	0	0	0	0	0	0	0	0	0	0	0	0	0	0	0	0	0	0	0	0	0	0	0	0	0	0	0	0	0	0
OTU2417	0	0	0	0	0	0	0	0	0	0	0	0	0	0	0	0	0	0	0	0	0	0	0	0	0	0	0	0	0	0	0	0	0	0	0	0	0	0	0	0	0	0	0	0	0	0	0	0	0
OTU2420	0	0	0	0	0	0	0	0	0	0	0	0	0	12	10	0	0	0	0	0	0	18	0	0	0	0	0	0	0	0	0	0	0	0	0	0	0	0	0	0	0	0	0	0	0	0	0	0	0
OTU2422	0	0	0	0	67	119	0	0	0	0	0	0	0	0	0	0	0	0	0	0	0	0	0	0	0	0	0	0	0	0	0	0	0	0	0	0	0	0	0	0	0	0	0	0	0	0	0	0	0
OTU2423	23	0	35	67	0	0	20	0	20	7	0	0	0	0	0	0	0	0	24	0	10	0	0	0	0	25	0	0	0	0	0	0	0	0	0	0	0	0	0	0	0	0	0	0	0	0	0	0	0
OTU2430	0	9	0	0	0	0	0	0	0	0	0	0	0	0	0	0	0	0	0	0	0	0	0	0	0	0	0	0	0	0	0	0	0	0	0	0	0	0	0	0	0	0	0	0	0	0	0	0	0
OTU2436	21	0	22	24	8	7	0	7	7	16	9	3	6	3	0	0	0	0	0	0	0	0	0	0	0	0	0	0	0	0	0	0	0	0	0	0	0	0	0	0	0	0	0	0	0	0	0	0	0
OTU244	87	0	108	147	0	9	0	84	86	97	0	0	0	0	0	0	0	0	93	0	63	0	56	0	0	100	33	90	39	0	25	75	25	0	113	0	85	0	101	0	0	0	65	0	0	0	0	0	36
OTU2442	0	0	0	0	32	7	0	0	0	0	0	0	44	69	11	59	44	0	0	0	0	0	0	0	0	0	0	0	0	0	0	0	0	0	0	0	0	0	0	0	0	0	0	0	0	0	0	0	0
OTU2443	32	0	41	31	22	0	0	29	22	32	13	0	0	0	0	0	0	0	0	0	0	0	0	0	0	0	0	0	0	0	0	0	0	0	0	0	0	0	0	0	0	0	0	0	0	0	0	0	0
OTU2446	0	0	0	0	0	0	0	0	0	0	0	0	0	0	0	0	10	0	0	0	0	0	0	12	0	0	0	0	9	0	0	17	0	0	0	0	0	0	0	0	0	0	0	0	0	0	0	0	0
OTU2448	0	0	0	0	0	0	0	0	0	0	0	0	0	0	0	0	0	0	0	0	0	0	0	0	0	0	0	0	0	0	0	0	0	0	0	0	0	0	0	0	0	0	0	0	0	0	0	0	0
OTU2449	58	0	23	107	0	0	0	16	28	16	0	0	0	0	0	0	0	0	38	0	0	0	54	0	0	0	44	35	0	0	0	0	21	0	18	0	18	0	17	0	0	0	0	0	0	0	0	0	0
OTU2450	0	15	0	0	41	37	0	0	0	0	0	33	18	38	0	28	0	0	0	0	0	0	0	0	0	0	0	0	0	0	0	0	0	0	0	0	0	0	0	0	0	0	0	0	0	0	0	0	0
OTU2451	17	0	48	23	0	10	14	7	6	8	0	0	0	0	0	0	0	0	15	0	32	0	15	0	0	8	0	14	38	12	23	62	0	0	53	0	29	0	7	0	0	0	20	0	0	0	0	0	62
OTU2457	8	0	5	5	4	0	0	7	0	9	13	0	0	0	0	0	0	0	0	0	0	0	0	0	0	14	41	4	0	54	0	11	71	0	0	0	0	0	0	0	0	0	0	0	0	0	0	0	0
OTU2458	0	0	0	0	12	14	0	0	0	0	0	0	0	0	0	0	0	0	0	0	0	0	0	0	0	0	0	0	0	0	0	0	0	0	0	0	0	0	0	0	0	0	0	0	0	0	0	0	0
OTU2460	32	0	53	18	8	0	10	12	0	0	0	0	0	0	0	0	0	0	0	0	14	0	11	0	0	19	0	9	0	0	17	24	0	0	51	0	49	0	48	0	0	0	0	0	0	0	9	0	25
OTU2469	0	0	0	0	30	38	38	0	0	0	0	0	0	0	0	0	0	0	0	0	0	0	0	0	0	0	0	0	18	0	29	31	0	66	0	88	0	70	0	47	42	0	0	0	0	29	0	77	62
OTU2475	0	0	0	0	43	60	11	0	0	0	0	47	52	65	41	43	41	36	0	24	0	0	0	41	19	0	0	0	0	0	0	22	0	38	0	23	0	0	0	35	45	0	0	0	0	16	0	63	76
OTU2478	23	0	33	0	0	0	0	18	0	15	0	0	0	0	0	27	26	0	35	15	25	16	0	0	13	20	0	0	0	0	0	28	0	0	38	27	30	28	0	0	20	0	31	0	12	0	0	0	0
OTU2480	17	0	29	28	0	0	0	15	10	13	0	0	0	0	0	0	0	0	13	0	0	0	22	0	0	33	29	19	18	73	0	14	13	0	14	0	13	0	18	0	0	16	33	0	0	0	0	0	0
OTU2482	36	0	0	0	0	0	0	34	0	0	0	0	0	0	0	0	0	0	0	0	0	0	0	0	0	0	0	0	0	0	0	0	0	0	0	0	0	0	0	0	0	0	0	0	0	0	0	0	0
OTU2483	0	0	0	0	0	10	0	0	0	0	0	24	0	0	23	24	359	0	0	0	0	0	0	29	0	0	0	0	0	0	0	0	0	0	0	0	0	0	0	0	0	0	0	0	0	0	0	0	0
OTU2496	0	0	0	67	73	0	0	52	54	0	0	0	0	0	0	0	0	0	0	0	0	0	0	0	0	0	0	0	0	0	0	0	0	0	0	0	0	0	0	0	0	0	0	0	0	0	0	0	0
OTU2498	0	0	0	0	0	0	0	0	0	0	0	0	0	0	0	0	0	0	0	0	0	0	0	0	0	0	0	0	0	0	0	0	0	0	0	0	0	0	0	0	0	0	0	0	0	0	0	0	0
OTU25	0	72	0	0	77	266	0	0	0	0	0	0	0	0	13	0	139	16	0	0	0	1381	0	0	0	0	0	0	83	0	0	62	0	0	0	0	0	212	0	0	0	0	43	148	0	0	273	0	0
OTU2502	0	0	0	0	0	0	0	0	0	0	0	0	0	0	0	0	0	0	0	0	0	0	0	0	0	0	0	0	0	0	0	0	0	0	0	0	0	0	0	0	0	0	0	0	0	0	0	0	0
OTU2504	0	0	0	0	0	0	0	5	11	11	186	0	0	0	0	0	0	0	0	0	0	0	0	0	0	0	0	0	0	0	0	0	0	0	0	0	0	0	0	0	0	0	0	0	0	0	0	0	0
OTU2505	0	0	0	0	12	0	0	0	0	0	0	0	23	11	8	15	28	0	0	0	0	10	0	6	10	0	0	0	0	0	10	11	0	19	0	16	0	6	0	0	0	0	0	0	9	0	5	6	0
OTU2510	7	12	11	25	33	16	0	37	22	0	0	0	0	0	0	0	0	0	0	0	0	0	0	0	0	0	0	0	0	0	0	0	0	0	0	0	0	0	0	0	0	0	0	0	0	0	0	0	0
OTU2511	0	0	0	0	0	26	0	0	0	0	0	0	0	0	12	0	0	0	0	0	0	0	0	0	0	0	0	0	39	19	0	10	10	0	0	0	0	0	0	0	0	18	0	0	0	0	0	0	0
OTU2512	0	0	0	0	0	0	0	0	0	0	0	0	0	0	0	0	0	25	0	47	0	15	0	27	124	0	0	0	28	0	41	34	0	0	0	0	0	0	0	0	0	0	0	0	0	30	0	194	0
OTU2514	45	0	33	32	0	0	0	18	13	33	0	0	0	0	0	0	0	0	0	0	0	0	39	0	0	17	0	0	0	21	0	45	32	0	0	0	0	0	0	0	0	0	0	0	0	0	0	0	0
OTU2515	44	0	31	47	0	0	0	0	0	25	0	0	0	0	0	0	0	0	26	0	0	0	0	0	0	43	0	0	29	0	0	79	0	0	0	0	29	0	18	0	0	0	40	50	0	17	0	35	0
OTU2517	41	0	52	32	0	0	0	0	29	0	0	0	0	0	0	0	0	0	52	0	50	0	0	0	0	80	0	19	0	0	0	0	0	0	17	0	14	0	0	0	0	0	0	0	0	0	0	0	0
OTU2518	0	0	0	0	21	0	0	0	0	0	0	0	0	0	0	0	0	0	0	0	0	0	0	0	0	0	0	0	0	0	0	0	0	0	0	0	0	0	0	0	0	0	0	0	0	0	0	0	0
OTU252	0	0	0	0	0	0	0	83	0	0	31	0	0	0	0	0	0	0	0	0	0	0	0	0	0	0	0	0	0	0	0	0	0	0	0	0	0	0	0	0	0	0	0	0	0	0	0	0	0
OTU2524	27	0	0	37	0	0	0	0	0	0	85	0	11	0	0	0	0	0	0	0	0	63	64	0	0	0	45	0	34	0	0	0	0	0	0	0	0	0	0	0	0	0	0	0	0	0	0	0	0
OTU2525	0	0	0	0	39	28	0	0	0	0	0	0	0	0	0	0	31	0	0	0	0	0	0	0	0	0	0	0	27	0	42	35	0	0	0	49	0	0	0	19	21	0	0	0	0	23	23	40	0
OTU2528	0	0	0	0	0	0	0	0	0	0	0	0	0	0	0	0	0	0	0	0	0	0	0	0	0	0	0	0	0	0	0	0	0	0	8	0	0	0	0	0	0	0	0	7	5	0	0	0	0
OTU2535	0	0	0	0	0	0	0	0	0	0	0	0	0	0	0	0	0	0	0	0	0	0	0	0	0	0	0	0	0	148	0	40	91	0	0	0	0	0	0	0	0	378	0	0	0	0	0	0	0
OTU2536	56	0	59	56	12	13	0	87	32	56	0	0	0	0	0	0	0	0	0	0	0	0	0	0	0	0	0	0	0	0	9	53	24	0	82	0	87	0	55	0	0	0	0	0	0	0	0	7	4
OTU2540	0	0	24	6	17	22	0	0	0	0	0	0	0	0	0	0	0	0	0	0	0	0	0	0	0	0	0	0	0	0	0	0	0	0	0	0	0	0	0	0	0	0	0	0	0	0	0	0	0
OTU2544	56	0	44	44	22	25	27	38	0	32	35	0	0	0	0	0	0	0	44	0	0	0	25	0	0	34	24	0	21	0	19	54	0	20	0	0	32	0	22	25	33	0	43	0	0	0	0	29	0
OTU255	0	0	0	0	0	13	0	0	0	0	0	34	39	31	31	0	61	17	0	0	0	10	0	14	12	0	0	0	37	0	5	22	0	33	0	22	0	15	0	18	50	0	0	0	97	8	13	44	0
OTU2553	0	0	0	0	18	22	0	0	0	0	0	0	6	8	0	0	9	8	0	11	0	12	0	0	0	0	0	0	16	0	0	0	0	0	0	0	0	0	0	0	0	0	0	0	0	0	0	0	0
OTU2559	26	0	0	0	9	30	0	0	0	0	0	0	0	0	0	8	32	0	0	0	0	0	0	0	0	0	0	0	0	0	0	0	0	0	0	0	0	0	0	0	0	0	0	0	0	0	0	0	0
OTU2562	0	0	7	10	0	0	0	0	0	0	0	51	81	87	0	0	0	0	8	0	8	0	5	0	0	5	3	6	0	0	0	0	5	0	0	0	0	0	0	0	0	0	0	0	0	0	0	0	0
OTU2567	0	0	0	0	0	0	0	20	0	0	0	0	0	0	0	0	0	0	0	0	0	0	0	0	0	0	0	0	0	0	0	0	0	0	0	0	0	0	0	0	0	0	0	0	0	0	0	0	0
OTU2579	22	0	65	8	0	11	0	0	0	7	0	49	41	0	0	0	0	0	0	0	0	0	0	0	0	0	0	0	0	0	0	0	0	0	0	0	0	0	0	0	0	0	0	0	0	0	0	0	0
OTU258	221	0	107	48	0	0	0	119	69	244	0	0	0	0	0	0	0	0	41	0	0	0	36	0	0	73	255	46	0	229	0	49	162	0	5	0	3	0	0	0	0	381	0	0	0	0	0	0	0
OTU2580	23	0	27	0	0	0	0	0	43	29	12	0	0	0	0	0	6	0	22	0	22	11	44	0	0	25	0	0	0	0	0	43	0	24	0	0	0	27	0	0	35	0	34	0	49	12	0	0	0
OTU2582	0	0	0	24	0	0	0	5	0	13	0	0	0	0	0	0	0	0	0	0	0	0	116	0	0	0	12	0	0	0	0	8	7	0	17	0	13	0	46	0	0	0	22	0	0	0	0	0	0
OTU2587	0	0	0	0	11	13	11	0	0	0	0	13	11	0	11	0	11	5	0	10	0	0	0	0	8	0	0	0	48	0	11	39	0	17	0	14	0	0	0	11	0	0	0	0	0	0	0	0	0
OTU2593	0	7	0	0	0	39	0	0	0	0	0	32	23	16	13	18	46	0	0	0	0	0	0	0	0	0	0	0	0	0	0	0	0	0	0	0	0	0	0	0	0	0	0	0	0	0	0	0	0
OTU2594	66	0	254	62	0	0	0	34	32	94	0	0	0	0	0	0	0	0	0	0	0	0	0	0	0	0	0	0	0	0	0	0	0	0	0	0	0	0	0	0	0	0	0	0	0	0	0	0	0
OTU2598	0	0	0	0	0	0	0	0	0	0	0	0	0	0	0	0	0	0	0	0	0	0	0	0	0	0	0	0	0	0	0	37	0	0	0	0	0	0	0	0	0	0	0	0	0	0	0	0	0
OTU2602	0	0	0	16	29	41	0	0	0	0	0	0	0	0	0	0	0	0	0	0	0	0	0	0	0	0	0	0	0	0	0	0	0	0	0	0	0	0	0	0	0	0	0	0	0	0	0	0	0
OTU2603	0	0	0	0	0	0	0	0	0	0	0	0	0	0	0	0	0	0	0	0	0	0	0	0	0	0	0	0	0	0	0	0	0	0	0	0	0	0	0	0	0	0	0	0	0	0	0	0	0
OTU2609	0	0	0	0	0	0	0	0	0	0	0	0	0	0	0	0	0	0	105	0	50	0	203	0	0	0	0	0	0	0	0	0	0	0	0	0	0	0	0	0	0	0	0	0	0	0	0	0	0
OTU261	0	150	0	0	0	0	0	0	0	0	0	0	0	0	0	0	0	0	0	0	0	0	0	0	0	0	0	0	0	0	0	0	0	0	0	0	0	0	0	0	0	0	0	0	0	0	0	0	0
OTU262	0	0	0	0	0	0	0	0	0	0	0	0	0	0	0	0	0	0	0	0	0	0	0	0	0	0	0	0	0	0	0	0	0	0	0	0	0	0	0	0	0	0	0	0	0	0	0	0	0
OTU2624	0	5	0	0	22	15	0	0	0	0	0	57	50	0	21	13	0	29	0	15	0	6	0	10	26	0	0	0	19	0	0	0	0	0	0	0	0	0	0	0	0	0	0	0	0	0	0	0	0
OTU2625	0	0	0	0	32	0	0	0	0	0	0	0	0	0	0	0	0	0	0	0	0	0	0	0	0	0	0	0	0	0	0	0	0	0	0	0	0	0	0	0	0	0	0	0	0	0	0	0	0
OTU2630	0	0	0	0	0	0	0	0	0	0	0	53	134	206	0	0	171	0	0	0	0	0	0	0	0	0	0	0	0	0	0	0	0	0	0	0	0	0	0	0	0	0	0	0	0	0	0	0	0
OTU2635	0	0	0	0	41	22	0	0	0	0	0	24	71	86	83	0	62	0	0	0	0	0	0	0	0	0	0	0	0	0	0	0	0	0	0	0	0	0	0	0	0	0	0	0	0	0	0	0	0
OTU2637	0	0	0	0	0	0	6	0	0	0	0	0	0	24	24	24	81	0	0	0	38	0	0	0	0	31	0	0	0	0	0	0	0	0	0	0	0	0	0	0	0	0	0	0	0	0	0	0	0
OTU2638	34	0	4	12	0	0	0	26	32	0	44	0	0	0	0	0	0	0	0	0	0	0	59	0	0	9	10	0	18	0	0	0	14	0	0	0	0	0	0	0	0	0	0	0	0	0	0	0	0
OTU2639	0	0	0	0	0	0	0	0	0	0	0	36	72	45	0	64	60	0	0	0	0	44	0	43	28	0	0	0	44	0	0	0	0	0	0	0	0	0	0	0	0	0	0	0	0	0	0	0	0
OTU264	0	5269	0	10	3	0	0	0	0	0	0	0	0	0	0	0	0	0	0	0	0	0	0	0	0	0	0	0	3	59	0	5	0	5	0	0	0	0	0	0	0	0	0	0	0	0	0	0	0
OTU2643	42	0	90	40	0	0	0	14	0	44	0	0	0	0	0	0	0	0	0	0	0	0	0	0	0	18	0	0	0	0	0	0	0	0	0	0	0	0	0	0	0	0	0	0	0	0	0	0	0
OTU2645	0	0	0	85	0	0	0	0	132	131	0	0	0	0	0	0	0	0	0	0	0	0	0	0	0	0	0	0	0	0	0	0	0	0	0	0	0	0	0	0	0	0	0	0	0	0	0	0	0
OTU2651	0	0	0	0	0	0	0	0	0	0	0	5	4	4	4	2	7	5	0	0	0	0	0	0	0	0	0	0	0	0	0	7	0	3	0	6	0	3	0	0	5	0	0	0	14	0	0	3	0
OTU2656	3	787	0	19	5	29	0	0	0	0	0	0	0	0	0	0	0	0	0	0	0	0	0	0	0	0	0	0	0	0	0	0	0	0	0	0	0	0	0	0	0	0	0	0	0	0	0	0	0
OTU2658	29	0	9	7	0	3	0	11	50	0	5	0	0	0	0	0	0	0	4	0	0	0	0	0	0	12	22	0	37	7	0	13	11	15	12	0	0	17	0	0	5	0	0	0	0	0	0	0	0
OTU2659	0	0	17	8	230	14	0	0	0	0	0	0	0	0	11	7	0	0	0	0	0	0	0	0	0	0	0	0	42	0	0	0	0	0	0	0	0	0	0	0	0	0	0	0	0	0	0	0	0
OTU2662	0	0	0	0	0	11	0	0	0	0	0	12	0	13	18	0	15	0	0	0	0	21	0	12	19	0	0	0	11	0	9	17	0	36	0	15	0	23	0	27	20	0	0	0	19	0	28	31	10
OTU2663	0	0	0	0	0	0	0	0	0	0	0	79	54	59	24	65	26	33	0	29	0	17	0	28	16	0	0	0	0	0	0	0	0	0	0	0	0	0	0	0	0	0	0	0	0	0	0	0	0
OTU2664	0	0	0	0	0	0	46	0	0	0	0	0	0	0	0	0	0	0	0	0	0	0	0	0	0	0	0	0	0	0	0	0	0	59	0	62	0	51	0	37	0	0	0	0	0	0	0	79	45
OTU2665	2	0	7	0	0	0	0	0	0	3	0	0	0	0	0	0	0	0	0	0	0	0	0	0	0	0	3	0	0	10	0	12	0	0	0	0	0	3	0	0	0	0	0	0	44	0	0	0	0
OTU2668	25	17	30	41	26	0	0	0	11	21	13	0	0	0	0	50	0	18	0	23	0	56	0	12	10	0	0	0	0	0	0	0	0	0	0	0	0	0	0	0	0	0	0	0	0	0	0	0	0
OTU2669	0	0	7	14	8	9	0	0	4	0	0	12	10	14	9	0	18	8	15	10	0	42	5	6	0	0	5	6	27	0	19	14	0	18	18	13	16	17	8	9	0	0	0	0	0	23	63	25	0
OTU267	0	0	0	0	0	0	0	12	0	0	222	0	0	0	0	0	0	0	0	0	0	7	0	12	0	0	0	0	1007	37	0	43	62	0	0	0	0	0	28	0	0	3	61	228	189	0	0	0	0
OTU2672	0	0	35	0	13	20	20	27	0	24	0	0	0	0	0	0	12	0	35	0	0	0	11	0	0	0	9	16	9	0	6	61	8	0	0	0	0	101	0	0	16	0	0	0	0	0	0	27	29
OTU2673	26	0	0	47	0	0	0	0	27	31	0	0	0	0	0	0	0	0	22	0	13	0	24	0	0	23	39	31	0	0	0	0	0	0	0	0	0	0	0	0	0	0	10	0	0	0	0	0	0
OTU2675	0	0	0	0	0	0	0	0	0	0	0	0	0	0	0	0	44	0	0	0	0	0	0	0	0	0	0	0	0	0	0	0	0	0	0	0	0	0	0	0	0	0	0	0	0	0	0	0	0
OTU2676	0	0	0	0	0	0	0	0	0	0	0	32	44	80	71	44	63	0	0	0	0	0	0	0	0	0	0	0	84	0	0	0	0	56	0	41	0	47	0	62	0	0	0	0	0	0	0	78	0
OTU2680	14	0	51	152	0	0	0	0	0	0	0	0	0	0	0	0	0	0	0	0	0	0	0	0	0	0	0	0	0	0	0	0	0	0	0	0	0	0	0	0	0	0	0	0	0	0	0	0	0
OTU2681	0	0	0	0	15	7	0	10	0	0	0	0	0	0	0	0	0	0	0	0	0	0	0	0	0	0	0	0	0	0	0	0	0	0	0	0	0	0	0	0	0	0	0	0	0	0	0	0	0
OTU2684	0	0	0	0	0	0	0	0	0	0	0	0	0	0	0	0	0	0	0	0	0	0	0	0	0	0	0	0	0	0	0	0	0	0	0	0	0	0	0	0	0	0	0	0	0	0	0	0	0
OTU2686	0	0	0	0	26	23	48	0	0	0	0	12	0	0	14	14	0	13	0	0	0	38	0	14	18	0	0	0	17	0	19	27	0	19	0	19	0	32	0	17	18	0	0	0	0	0	0	6	0
OTU269	115	0	0	29	0	0	0	79	88	34	49	0	0	0	0	0	0	0	0	0	0	0	0	0	0	0	0	0	0	0	0	0	0	0	0	0	0	0	0	0	0	0	0	0	0	0	0	0	0
OTU2695	0	0	0	0	6	0	0	0	0	0	0	33	50	58	28	28	16	0	0	0	0	0	0	0	0	0	0	0	0	0	0	0	0	0	0	0	0	0	0	0	0	0	0	0	0	0	0	0	0
OTU2698	0	0	0	0	8	0	0	0	0	0	0	0	5	0	16	0	0	14	0	0	0	0	0	0	0	0	0	0	0	0	0	0	0	9	0	8	0	8	0	0	0	0	0	0	0	0	0	13	0
OTU2707	73	0	0	35	0	0	0	0	6	13	0	0	0	0	0	0	0	0	0	0	0	0	0	0	0	15	0	49	0	0	0	11	0	0	0	0	0	0	0	0	0	0	54	0	0	0	0	0	0
OTU2711	0	0	0	34	0	0	0	0	0	27	0	0	0	0	0	0	0	0	0	0	0	0	0	0	0	0	0	0	0	0	0	0	0	0	0	0	0	0	0	0	0	0	0	0	0	0	0	0	0
OTU2718	0	0	0	0	0	0	0	0	0	0	0	12	0	0	16	0	88	21	0	0	0	0	0	44	0	0	0	0	0	0	0	0	0	0	0	0	0	0	0	0	0	0	0	0	0	0	0	0	0
OTU2722	0	0	0	0	0	0	0	0	0	0	0	0	0	10	20	0	0	15	0	0	0	0	0	0	0	0	0	0	0	0	0	0	0	0	0	0	0	0	0	0	0	0	0	0	0	0	0	0	0
OTU2727	65	0	151	45	0	0	0	16	17	20	0	0	0	0	0	0	0	0	84	0	99	0	18	0	0	14	27	9	0	12	0	10	36	0	0	0	0	0	0	0	0	0	0	0	0	0	0	0	0
OTU2732	21	0	0	16	0	0	0	0	0	20	0	0	0	0	0	0	0	0	25	0	14	0	14	0	20	0	8	25	0	0	13	33	20	18	0	0	0	0	0	0	18	0	0	0	0	0	0	0	0
OTU2733	23	0	20	62	0	0	0	33	0	0	0	0	0	0	0	0	0	0	13	0	15	0	38	0	0	68	0	0	0	0	0	0	0	0	0	0	0	0	0	0	0	0	0	0	0	0	0	0	0
OTU2739	0	0	0	0	0	0	0	0	0	0	0	0	0	101	0	0	35	0	0	0	0	0	0	0	0	0	0	0	0	0	0	0	0	0	0	0	0	0	0	0	0	0	0	0	0	0	0	0	0
OTU2743	18	0	0	18	0	0	0	0	10	17	0	0	0	0	0	0	0	0	0	0	0	0	0	0	0	0	0	17	0	0	0	25	0	0	0	0	0	0	0	0	0	0	0	0	0	0	0	0	0
OTU2746	21	0	32	0	0	0	0	0	33	19	0	14	0	0	0	0	0	0	0	0	0	0	0	0	0	0	0	0	0	0	0	0	0	0	0	0	0	0	0	0	0	0	0	0	0	0	0	0	0
OTU2751	0	804	0	0	0	0	0	0	0	0	0	0	0	0	0	0	0	0	0	3	0	0	0	0	0	0	0	0	0	0	0	0	0	0	0	0	0	0	0	0	0	0	0	0	0	0	0	0	0
OTU2754	0	0	0	0	15	0	0	0	0	0	0	0	0	0	0	0	0	0	0	0	0	0	0	0	0	0	0	0	0	0	0	0	0	0	0	0	0	0	0	0	0	0	0	0	0	0	0	0	0
OTU2757	0	0	0	0	0	0	0	0	0	0	0	45	58	59	21	23	46	39	0	34	0	21	0	26	0	0	0	0	0	0	0	24	0	88	0	135	0	70	0	50	0	0	0	0	0	0	0	18	0
OTU2759	58	0	53	19	0	0	0	30	0	33	0	0	0	0	0	0	36	0	19	0	45	0	31	0	0	42	55	38	0	38	0	0	38	0	0	0	0	0	0	0	0	0	7	0	0	0	0	0	0
OTU2762	40	0	49	28	21	20	4	28	17	26	0	0	0	14	0	15	16	0	15	0	0	0	0	0	0	27	0	55	0	0	0	28	0	0	0	0	0	0	0	0	0	0	0	0	0	0	0	0	0
OTU2769	50	0	80	34	29	38	0	0	0	0	0	0	0	0	0	0	0	0	0	0	0	0	0	0	0	0	0	0	0	0	0	0	0	0	0	0	0	0	0	0	0	0	0	0	0	0	0	0	0
OTU2778	44	0	47	35	21	0	0	18	18	60	10	0	0	0	0	0	0	0	0	0	0	0	0	0	0	0	0	0	0	0	0	0	0	0	0	0	0	0	0	0	0	0	0	0	0	0	0	0	0
OTU2780	39	0	30	73	0	26	0	0	19	17	20	0	0	0	0	0	37	0	0	0	0	0	0	0	0	0	0	0	0	0	0	0	0	0	0	0	0	0	0	0	0	0	0	0	0	0	0	0	0
OTU2788	0	0	0	0	10	16	0	0	0	0	0	37	39	42	69	47	184	0	0	0	0	0	0	0	0	0	0	0	0	0	0	0	0	0	0	0	0	0	0	0	0	0	0	0	0	0	0	0	0
OTU2791	0	0	0	0	65	43	0	0	0	0	0	40	21	0	0	0	0	0	0	0	0	0	0	0	0	0	0	0	0	0	0	0	0	0	0	0	0	0	0	0	0	0	0	0	0	0	0	0	0
OTU2795	0	0	0	0	0	0	0	0	0	0	0	0	0	0	0	0	0	0	0	0	0	0	0	0	0	0	0	0	0	0	0	0	0	0	0	0	0	0	0	0	0	0	0	0	0	0	0	0	0
OTU280	145	8	200	191	35	33	0	34	125	117	0	0	0	0	0	0	0	0	171	0	151	0	100	0	0	229	45	158	157	0	12	71	0	0	91	0	68	59	70	0	80	0	62	12	26	13	0	32	0
OTU2801	0	7	0	0	0	15	0	0	0	0	0	0	0	0	0	0	0	0	0	0	0	0	0	0	0	0	0	0	24	0	7	11	0	23	0	21	0	16	0	18	0	0	0	0	0	8	23	19	8
OTU2805	13	0	29	25	17	33	23	9	0	18	7	0	8	6	19	0	18	0	32	0	28	4	0	8	7	16	0	6	8	0	8	65	0	43	0	20	0	0	0	16	42	0	0	0	0	0	0	0	0
OTU2809	0	0	0	0	0	0	0	23	0	0	0	0	0	0	0	0	0	0	0	0	0	0	0	0	0	0	0	0	0	0	0	0	0	0	0	0	0	0	0	0	0	0	0	0	0	0	0	0	0
OTU2811	82	0	48	67	0	0	0	43	40	71	17	0	0	0	0	0	0	0	0	0	0	0	0	0	0	0	0	0	0	0	0	0	0	0	0	0	0	0	0	0	0	0	0	0	0	0	0	0	0
OTU2812	0	0	0	0	0	0	0	0	0	0	0	4	0	0	15	0	0	0	8	0	0	0	0	0	4	0	0	0	12	0	0	21	0	9	0	0	0	0	0	13	0	0	0	0	0	0	0	0	0
OTU2816	0	0	0	0	0	0	0	0	0	0	0	0	0	0	0	0	0	0	0	0	0	0	0	0	0	0	0	0	0	0	0	0	0	0	0	0	0	0	16	0	0	0	0	0	0	0	0	0	0
OTU282	81	27	58	63	0	0	0	740	1472	0	122	0	0	0	0	0	0	0	0	0	0	0	0	0	0	0	0	0	0	0	0	0	0	0	0	0	0	0	0	0	0	0	0	0	0	0	0	0	0
OTU2821	0	0	0	0	0	0	0	0	0	0	0	0	0	12	0	0	0	0	0	0	0	0	0	0	0	0	0	0	0	0	0	0	0	0	0	0	0	0	0	0	0	0	0	0	0	0	0	0	0
OTU2824	37	0	0	26	0	0	0	0	0	0	0	0	0	0	0	0	0	0	0	0	0	0	0	0	0	21	0	13	0	0	0	27	0	0	25	0	7	0	31	0	0	0	0	0	30	0	0	0	0
OTU2827	0	0	0	0	63	0	0	0	0	0	0	43	0	0	247	69	0	0	0	0	0	0	0	0	50	0	0	0	0	0	0	0	0	0	0	0	0	0	0	0	0	0	0	0	0	0	0	0	0
OTU283	0	0	0	0	0	0	0	395	0	91	38	0	0	0	0	0	0	0	0	0	0	0	0	0	0	0	0	0	0	0	0	0	0	0	0	0	0	0	0	0	0	0	0	0	0	0	0	0	0
OTU2830	0	0	0	0	0	0	0	0	0	0	0	0	0	0	0	0	0	0	0	0	0	0	0	0	0	0	0	0	0	0	0	0	0	0	0	0	0	0	0	0	0	0	0	0	0	0	0	0	0
OTU2838	0	7	0	0	32	0	10	0	0	0	0	30	17	0	8	0	64	0	0	0	0	0	0	0	4	0	0	0	28	0	7	0	0	0	0	0	0	0	0	16	0	0	0	0	0	0	0	0	0
OTU284	0	0	0	0	15	0	0	0	0	0	0	0	0	0	24	18	24	0	24	0	0	0	0	23	22	0	0	0	39	0	0	34	0	48	70	58	61	33	0	0	58	0	0	0	45	0	0	0	0
OTU2841	0	0	0	0	0	0	0	0	0	0	0	0	0	0	0	0	20	0	0	0	0	0	0	0	0	0	0	0	0	0	0	70	0	0	0	62	0	42	0	0	0	0	0	0	0	0	69	62	68
OTU285	0	0	0	0	320	140	0	0	0	0	46	571	349	118	231	197	413	156	0	103	0	200	0	138	339	0	0	0	171	0	0	0	0	0	0	0	0	0	0	0	0	0	0	0	0	0	0	0	0
OTU2851	19	0	0	12	0	0	0	18	0	0	0	0	0	0	0	0	0	0	10	0	10	0	0	0	0	0	0	11	0	0	0	0	0	0	0	0	0	0	0	0	0	0	0	0	0	0	0	0	0
OTU2852	0	0	0	0	0	0	0	0	0	0	0	0	0	0	0	0	0	0	0	0	0	0	0	0	0	0	0	0	0	0	0	12	0	18	0	9	0	13	0	0	0	0	0	10	0	0	0	0	0
OTU2853	0	0	0	0	0	0	0	0	0	0	0	0	0	0	0	0	0	0	0	0	0	0	0	0	0	0	0	0	0	0	0	0	0	0	0	0	0	0	0	0	0	0	0	0	0	0	0	0	0
OTU2855	61	0	21	23	15	0	0	0	0	12	0	0	0	0	0	0	0	0	0	0	0	0	27	0	0	0	32	19	9	7	9	33	10	0	0	0	0	0	10	0	0	0	0	0	14	0	0	0	0
OTU286	0	12	0	0	0	28	0	0	0	0	0	39	43	121	0	0	131	27	0	13	0	67	0	0	0	0	0	0	42	0	24	0	0	0	0	0	0	0	0	0	0	0	0	33	0	10	55	19	0
OTU2863	0	0	0	0	0	0	0	0	0	0	0	0	0	0	0	0	0	0	0	0	0	0	0	0	0	0	0	0	0	0	0	0	0	0	0	0	0	0	0	0	0	0	0	0	0	0	0	0	0
OTU2867	0	0	6	0	0	0	0	8	0	5	0	0	0	0	0	0	0	0	0	0	0	0	0	0	0	0	0	0	0	0	0	0	0	0	0	0	4	0	7	0	0	0	6	36	0	0	0	0	0
OTU2871	0	0	0	0	0	0	28	0	14	26	0	0	0	0	0	0	0	0	0	0	0	0	0	0	0	0	0	0	0	2	0	106	26	0	35	0	27	0	0	0	0	0	0	0	0	0	0	0	0
OTU2874	0	0	0	35	12	31	34	0	23	0	0	0	0	0	0	0	0	0	0	0	0	0	13	0	0	0	0	20	15	0	0	0	0	0	0	0	0	0	0	0	0	0	37	0	0	0	0	0	59
OTU2879	0	0	0	0	14	0	0	0	0	0	0	0	0	0	0	0	0	0	0	0	0	0	0	0	0	0	0	0	0	0	0	0	0	0	0	0	0	0	0	0	0	0	0	0	0	0	0	0	0
OTU2881	0	0	0	0	0	0	0	0	0	0	0	50	44	17	32	0	0	32	0	33	0	0	0	0	0	0	0	0	50	0	0	35	0	0	0	0	0	0	0	0	21	0	0	0	0	0	0	0	0
OTU2886	51	0	0	34	0	0	0	0	27	0	0	0	0	0	0	0	0	0	0	0	0	0	0	0	0	0	0	0	0	0	0	0	0	0	0	0	0	0	0	0	0	0	0	0	0	0	0	0	0
OTU290	56	0	71	96	14	0	0	35	60	31	20	16	0	16	0	17	0	0	84	0	73	0	53	0	0	45	33	89	34	74	25	72	26	27	61	19	61	33	29	0	13	0	113	0	0	19	74	24	22
OTU2901	0	0	0	0	47	13	0	0	0	0	0	0	0	0	0	0	0	0	0	0	0	0	0	0	0	0	0	0	0	0	0	0	0	0	0	0	0	0	0	0	0	0	0	0	0	0	0	0	0
OTU2902	0	0	0	0	0	0	0	0	0	0	0	0	0	31	51	48	53	26	0	26	0	28	0	26	46	0	0	0	0	0	0	0	0	0	0	0	0	0	0	0	0	0	0	0	0	0	0	0	0
OTU2903	16	0	8	13	15	9	4	28	14	33	0	6	3	13	8	12	8	5	12	0	9	4	9	0	7	13	7	15	0	0	0	34	0	9	0	12	0	19	0	10	34	0	0	0	0	0	7	18	18
OTU2907	8	0	0	8	0	0	0	22	12	0	0	0	0	0	0	0	0	0	9	0	0	0	12	0	0	8	9	13	0	7	0	0	4	0	0	0	0	0	18	0	0	0	0	0	0	0	0	0	0
OTU291	43	48	70	334	84	98	0	117	104	0	49	0	0	0	0	0	0	0	0	0	0	0	0	0	0	0	0	0	0	0	0	0	0	0	0	0	0	0	0	0	0	0	0	0	0	0	0	0	0
OTU2910	0	0	0	0	13	0	0	0	0	0	0	0	0	0	0	0	0	0	0	0	0	0	0	0	0	0	0	0	0	0	0	21	0	62	0	103	0	109	0	43	23	0	0	0	6	0	16	19	0
OTU2913	16	0	23	19	0	26	0	0	11	0	0	0	0	0	0	0	0	0	14	0	0	0	8	0	0	0	0	10	17	0	10	21	0	0	0	0	0	0	0	0	0	0	0	0	0	0	0	0	0
OTU2915	25	0	39	46	0	0	0	28	0	25	0	0	0	0	0	0	0	0	0	0	0	0	0	0	0	0	0	0	0	0	0	0	0	0	0	0	0	0	0	0	0	0	0	0	0	0	0	0	0
OTU2916	0	0	0	0	28	15	15	0	0	0	0	0	0	0	0	0	9	0	0	0	0	23	0	0	0	0	0	0	13	0	21	21	0	0	0	0	0	0	0	0	43	0	0	0	0	15	0	19	0
OTU2917	0	0	10	0	79	0	0	0	0	11	0	81	44	63	0	31	57	0	0	0	0	0	0	0	0	0	0	0	0	0	0	0	0	0	0	0	0	0	0	0	0	0	0	0	0	0	0	0	0
OTU292	0	0	0	0	39	0	0	0	0	6	0	121	124	139	60	40	0	0	0	0	0	0	0	0	0	0	0	0	0	0	0	0	0	0	0	0	0	0	0	0	0	0	0	0	0	0	0	0	0
OTU2928	0	0	0	0	19	0	0	0	0	0	0	0	86	41	14	17	75	0	0	0	0	0	0	0	20	0	0	0	0	0	0	17	0	23	0	24	0	0	0	0	0	0	0	0	0	0	0	0	0
OTU2929	0	0	0	0	0	0	0	10	8	0	0	51	41	46	18	0	56	10	5	0	0	27	0	16	40	0	0	0	9	10	0	17	10	0	4	11	0	9	0	12	0	0	0	0	0	6	11	10	0
OTU293	60	33	71	120	57	39	0	37	72	68	73	28	0	38	0	36	79	0	0	7	0	11	0	0	0	0	0	0	0	0	0	0	0	0	0	0	0	0	0	0	0	0	0	0	0	0	0	0	0
OTU2930	0	0	0	0	0	0	0	0	0	0	0	0	0	0	0	0	0	0	0	0	0	0	6	0	0	0	0	0	0	0	0	7	0	0	0	0	0	0	0	0	4	0	0	0	54	0	0	0	0
OTU2931	0	0	0	0	25	37	0	0	0	0	0	0	0	0	0	0	0	0	0	0	0	0	0	0	0	0	0	0	0	0	0	0	0	0	0	0	0	0	0	0	0	0	0	0	0	0	0	0	0
OTU2935	0	0	0	0	14	8	0	0	0	0	0	0	0	17	15	12	0	7	0	0	0	0	0	12	33	0	0	0	8	0	7	21	0	26	0	19	0	7	0	23	39	0	0	0	0	0	0	17	42
OTU2936	0	0	0	0	0	0	0	0	0	0	0	52	47	0	0	0	0	0	0	0	0	0	0	20	0	0	0	0	0	0	0	0	0	0	0	0	0	0	0	0	0	0	0	0	0	0	0	0	0
OTU2938	0	0	0	0	0	0	0	0	0	0	0	0	0	0	6	0	0	0	0	0	0	11	0	0	0	15	0	0	0	3	0	0	0	0	0	0	0	0	0	0	0	0	0	0	0	0	0	0	0
OTU294	16	0	4	0	0	20	0	0	0	0	48	0	0	0	0	0	0	0	0	0	0	0	0	0	0	6	0	10	22	883	0	110	191	5	109	5	98	0	62	0	0	192	0	114	0	0	0	0	0
OTU295	75	0	166	131	0	0	0	100	44	77	0	0	0	0	0	0	0	0	0	0	0	0	0	0	0	0	0	0	0	0	0	0	0	0	0	0	0	0	0	0	0	0	0	0	0	0	0	0	0
OTU2951	0	0	0	0	45	29	0	0	0	0	0	0	0	0	25	0	0	0	0	0	0	0	0	0	0	0	0	0	0	0	0	0	0	0	0	0	0	0	0	0	0	0	0	0	0	0	0	0	0
OTU2953	11	0	0	0	0	0	0	13	0	0	5	0	0	0	0	0	0	0	0	0	0	0	0	0	0	103	24	0	112	15	0	26	24	0	0	0	46	0	64	0	0	90	0	0	0	0	0	0	0
OTU2960	0	0	0	0	4	0	0	0	0	0	0	0	0	0	0	0	0	0	0	0	0	0	0	0	0	0	0	0	0	0	0	0	0	0	0	0	0	0	0	0	0	0	0	0	0	0	0	0	0
OTU2964	0	0	0	0	61	0	0	0	0	0	0	0	0	84	0	0	187	0	0	0	0	0	0	0	35	0	0	0	0	0	51	0	0	51	0	45	0	0	0	0	0	0	0	0	0	0	0	0	0
OTU2965	0	0	103	0	111	0	0	0	0	0	0	0	0	0	49	0	86	0	0	0	0	0	0	0	93	0	0	0	0	0	0	0	0	0	0	0	0	0	0	0	0	0	0	0	0	0	0	0	0
OTU2966	34	0	0	54	0	0	0	0	0	19	0	0	0	0	0	0	0	0	0	0	0	0	0	0	0	36	0	21	0	0	0	0	0	0	0	0	0	0	0	0	0	0	0	0	0	0	0	0	0
OTU2968	12	0	4	0	0	0	0	23	6	10	52	0	0	0	0	0	0	0	0	0	0	0	0	0	0	0	0	0	0	0	0	0	0	0	0	0	0	0	0	0	0	0	0	0	0	0	0	0	0
OTU2971	0	0	44	0	0	0	0	0	0	25	0	0	0	0	0	0	0	0	0	0	0	0	0	0	0	0	0	0	0	0	0	47	0	0	77	0	55	0	0	0	0	0	0	0	0	0	0	0	0
OTU2973	134	0	52	42	0	20	0	7	0	10	0	0	0	0	11	0	0	0	0	0	0	0	0	0	0	0	0	0	0	0	0	0	0	0	0	0	0	0	0	0	0	0	0	0	0	0	0	0	0
OTU2974	0	0	0	0	0	0	0	0	0	0	0	0	0	44	0	0	0	0	0	0	0	0	0	0	0	0	0	0	0	0	0	0	0	0	0	0	0	0	0	0	0	0	0	0	0	0	0	0	0
OTU2975	0	0	0	0	41	21	0	0	0	0	15	0	0	0	0	0	0	0	0	0	0	0	0	0	0	0	0	0	0	0	0	0	0	0	0	0	0	0	0	0	0	0	0	0	0	0	0	0	0
OTU2977	0	0	0	0	27	21	0	0	0	0	0	48	30	40	22	18	44	0	0	0	0	0	0	0	0	0	0	0	0	0	0	0	0	0	0	0	0	0	0	0	0	0	0	0	0	0	0	0	0
OTU2981	9	3	0	5	0	4	0	3	6	0	12	10	5	6	2	6	5	0	0	0	0	0	0	0	0	0	0	0	0	0	0	0	0	0	0	0	0	0	0	0	0	0	0	0	0	0	0	0	0
OTU2984	0	0	0	0	11	27	2	0	0	0	0	3	0	24	0	0	25	0	0	0	0	0	0	0	0	2	0	0	45	0	10	16	0	10	0	14	6	15	4	13	53	0	21	0	3	11	12	15	30
OTU2985	39	0	44	43	0	0	0	31	18	22	0	0	0	0	0	0	0	0	0	0	0	0	0	0	0	0	0	0	0	0	0	0	0	0	0	0	0	0	0	0	0	0	0	0	0	0	0	0	0
OTU2991	0	0	15	15	0	0	0	0	0	0	0	0	0	0	0	0	0	0	23	0	21	0	0	0	0	0	0	15	0	0	0	0	0	0	0	0	0	0	0	0	0	0	13	0	0	0	0	0	0
OTU2995	0	0	0	0	0	0	0	0	0	0	0	63	89	183	0	0	151	0	0	0	0	0	0	0	0	0	0	0	0	0	0	0	0	0	0	0	0	0	0	0	0	0	0	0	0	0	0	0	0
OTU3	0	69	0	0	0	0	0	0	0	0	0	2	0	0	0	0	6	0	0	288	0	0	0	0	0	0	0	0	5	14	0	11	0	0	0	0	0	0	0	0	0	0	0	0	0	0	0	0	0
OTU3002	0	0	0	0	30	20	0	0	0	0	0	0	12	22	0	0	27	0	0	0	0	0	0	0	0	0	0	0	0	0	0	0	0	0	0	0	0	0	0	0	0	0	0	0	0	0	0	0	0
OTU3004	0	0	0	15	38	47	0	0	0	0	51	0	0	0	17	0	0	0	0	0	0	0	0	0	0	0	0	0	0	0	0	0	0	0	0	0	0	0	0	0	0	0	0	0	0	0	0	0	0
OTU3009	0	0	0	0	0	0	0	0	0	0	0	0	21	42	0	0	51	18	28	19	69	17	0	23	0	0	0	0	0	5	0	30	0	0	0	0	0	0	0	0	0	0	0	0	0	0	20	0	0
OTU3012	0	0	0	0	0	0	0	0	0	0	0	43	113	308	34	0	0	0	0	0	0	0	0	0	0	0	0	0	31	0	0	0	0	0	0	0	0	0	0	0	0	0	0	0	0	0	0	0	0
OTU3014	8	0	15	0	0	0	0	0	5	0	0	0	0	0	0	0	0	0	0	0	0	0	0	15	0	0	0	0	8	0	15	34	0	25	0	0	0	27	0	0	0	0	5	0	0	0	0	51	27
OTU3015	28	0	25	19	0	0	0	0	9	19	7	0	0	0	0	0	0	0	0	0	0	0	11	0	0	12	15	8	0	0	0	20	20	0	37	0	31	0	13	0	0	0	11	0	0	0	0	0	0
OTU3018	0	0	0	0	0	0	0	0	0	0	0	0	0	0	0	0	0	0	0	0	0	0	0	0	0	0	0	0	0	0	0	0	0	0	0	0	0	0	0	0	0	0	0	0	0	0	0	0	0
OTU302	67	0	91	112	0	0	0	64	72	98	64	64	136	134	62	67	85	92	46	68	31	173	40	48	55	34	50	48	45	0	0	115	54	51	116	84	58	70	35	25	0	0	58	0	0	39	36	36	51
OTU3023	0	0	0	0	0	0	0	43	0	0	0	0	0	0	0	0	0	0	0	0	0	0	0	0	0	0	0	0	0	0	0	0	0	0	0	0	0	0	0	0	0	0	0	0	0	0	0	0	0
OTU3029	0	0	0	0	0	0	0	0	0	0	0	68	28	105	237	29	236	0	0	0	0	0	0	0	0	0	0	0	0	0	0	0	0	0	0	0	0	0	0	0	0	0	0	0	0	0	0	0	0
OTU303	0	0	0	0	0	0	0	0	0	0	0	16	56	0	13	0	17	0	0	0	0	37	0	12	0	0	0	0	17	0	17	14	0	0	0	0	0	0	0	53	0	0	0	0	0	0	0	0	0
OTU3035	0	0	0	0	32	15	0	0	0	0	0	47	45	27	0	32	0	16	0	16	0	6	0	24	27	0	0	0	19	0	0	0	0	0	0	0	0	0	0	0	0	0	0	0	0	0	0	0	0
OTU3037	0	0	18	17	0	0	0	0	0	9	0	0	0	0	0	0	0	0	24	0	0	0	0	0	0	11	15	11	0	3	0	0	10	0	57	0	60	0	32	0	0	0	15	0	0	0	0	0	0
OTU3039	0	0	0	0	9	0	0	0	0	0	0	0	0	0	0	0	16	0	17	0	40	0	0	0	0	0	0	29	0	15	0	11	6	0	0	0	0	0	48	0	0	0	11	0	40	0	0	0	0
OTU3041	0	0	42	62	0	0	0	22	0	57	0	0	0	0	0	0	0	0	0	0	0	0	0	0	0	0	0	0	0	0	0	0	0	0	0	0	0	0	0	0	0	0	0	0	0	0	0	0	0
OTU3049	0	0	0	0	0	0	0	0	0	0	0	0	0	0	0	0	0	0	0	0	0	0	0	0	0	0	0	0	0	0	0	0	0	0	0	0	0	0	0	0	0	0	0	0	0	0	0	0	0
OTU3051	0	0	0	0	0	9	0	0	0	0	0	0	0	0	11	0	0	10	0	0	0	0	0	0	12	0	0	0	12	0	0	0	0	0	0	0	0	0	0	0	0	0	0	0	0	0	0	0	0
OTU3054	0	0	0	0	0	40	0	0	0	0	0	0	0	0	0	0	0	0	0	0	0	0	0	0	0	0	0	0	0	0	0	0	0	0	0	0	0	0	0	0	0	0	0	0	0	0	0	0	0
OTU3056	0	0	0	0	4	0	0	0	0	0	0	0	0	0	0	0	0	0	0	0	0	0	0	0	0	0	0	0	0	0	0	0	0	0	0	0	0	0	0	0	0	0	0	0	0	0	0	0	0
OTU3059	0	0	0	48	0	0	0	0	0	0	0	0	0	0	0	0	32	0	25	0	0	15	28	0	0	25	25	15	16	41	15	33	17	0	0	0	0	40	0	0	27	0	0	0	0	0	0	0	0
OTU3060	56	0	12	36	0	0	0	13	29	0	12	0	0	0	0	0	0	0	0	0	0	0	0	0	0	0	0	0	0	0	0	0	0	0	0	0	0	0	0	0	0	0	0	0	0	0	0	0	0
OTU3061	0	0	32	0	26	0	0	0	0	0	0	31	23	41	8	0	39	0	0	21	0	46	0	0	25	0	0	0	0	0	0	0	0	0	0	0	0	0	0	0	0	0	0	0	0	0	0	0	0
OTU3062	0	0	33	53	0	0	0	0	13	0	0	0	0	0	0	0	0	0	76	0	44	0	22	0	0	26	0	19	0	0	0	37	0	0	21	0	26	0	22	0	0	0	22	0	0	0	0	0	0
OTU3064	0	0	0	0	0	0	0	6	0	0	0	0	0	0	0	0	0	0	0	0	0	0	0	0	0	12	39	0	0	0	0	0	26	0	0	0	0	0	0	0	0	0	0	0	0	0	0	0	0
OTU3066	0	0	0	0	0	0	0	0	0	0	0	0	0	0	0	0	0	0	0	0	0	0	0	0	0	0	0	0	0	0	0	0	0	0	0	0	0	0	0	0	0	0	0	0	0	0	0	0	0
OTU3073	0	0	0	0	0	0	0	0	0	0	0	0	0	0	0	0	0	0	0	0	0	0	0	0	0	0	0	0	0	0	0	0	0	0	0	0	0	0	0	0	0	0	0	0	0	0	0	0	0
OTU308	61	0	65	77	16	20	0	47	15	0	0	0	0	0	0	0	122	0	28	0	29	0	17	0	0	0	0	0	18	0	10	80	0	61	0	55	0	40	0	27	8	0	0	0	81	0	0	0	0
OTU3080	10	0	13	13	0	10	0	0	0	0	0	0	0	0	0	0	0	0	25	0	16	0	9	0	3	0	0	20	0	0	19	15	0	0	25	28	12	0	0	0	0	0	0	0	0	12	0	0	0
OTU3085	0	0	0	0	0	0	15	0	0	0	0	42	98	21	14	15	0	6	0	9	0	0	0	12	60	0	0	0	0	0	0	0	0	0	0	0	0	0	0	0	0	0	0	0	0	0	0	0	0
OTU3087	0	0	0	0	18	0	0	0	0	0	0	0	0	0	0	81	0	0	0	0	0	0	0	0	69	0	0	0	19	0	57	142	0	16	0	16	0	0	0	6	0	0	0	0	0	0	0	0	0
OTU3093	0	0	0	0	9	0	0	0	0	0	0	6	8	0	14	28	12	0	0	0	0	0	0	14	11	0	0	0	0	0	6	0	0	16	0	12	0	0	0	0	23	0	0	0	0	16	0	10	0
OTU3094	0	0	0	0	0	0	0	0	0	0	0	0	0	0	0	0	0	0	0	0	0	0	0	0	0	0	0	0	0	0	0	29	0	41	0	59	0	80	0	27	148	0	0	0	13	0	0	54	97
OTU3099	13	0	9	21	0	0	0	16	6	0	0	0	0	0	0	0	0	0	13	0	0	0	16	0	0	16	13	19	0	0	0	37	0	0	50	0	37	0	33	0	0	0	23	0	9	0	0	0	0
OTU31	0	72	0	0	42	107	0	0	0	0	0	0	0	0	0	0	145	0	0	14	0	889	0	0	15	0	0	0	59	0	0	83	0	14	8	13	0	533	0	0	0	0	18	84	39	0	347	0	0
OTU310	0	0	0	0	321	112	0	0	0	0	0	68	0	0	93	606	0	0	0	0	0	0	0	0	0	0	0	0	0	0	0	0	0	0	0	0	0	0	0	0	0	0	0	0	0	0	0	0	0
OTU3101	0	0	0	0	0	0	0	0	0	0	0	0	0	0	0	0	0	0	0	0	0	0	0	0	0	0	0	0	0	0	0	0	0	0	0	0	0	0	0	0	0	0	0	0	0	0	0	0	0
OTU3103	0	0	0	0	0	0	0	0	0	0	0	0	0	0	0	0	0	0	0	0	0	0	0	0	0	0	0	0	0	0	0	28	0	0	0	9	0	0	0	0	0	0	0	0	0	0	0	0	0
OTU3109	0	0	0	0	21	38	0	0	0	0	0	57	0	26	31	38	0	0	0	0	0	0	0	0	0	0	0	0	0	0	0	0	0	0	0	0	0	0	0	0	0	0	0	0	0	0	0	0	0
OTU312	0	0	0	0	20	0	0	0	0	0	0	0	0	21	0	0	43	0	0	0	0	0	0	0	0	0	0	0	0	0	0	0	0	32	0	21	0	23	0	0	0	0	0	0	39	0	0	14	0
OTU3121	0	0	0	0	0	0	0	0	0	0	0	0	0	0	0	0	36	0	0	0	0	0	0	0	0	0	0	0	0	0	39	37	0	0	0	55	0	0	0	60	0	0	0	0	0	0	0	0	0
OTU3122	0	0	0	0	0	0	0	0	0	0	0	40	117	191	0	0	143	0	0	0	0	0	0	0	0	0	0	0	0	0	0	0	0	0	0	0	0	0	0	0	0	0	0	0	0	0	0	0	0
OTU3131	20	0	7	3	0	0	0	0	0	10	33	0	0	0	0	0	0	0	10	0	0	0	5	0	0	15	33	5	0	15	0	16	11	0	0	0	0	0	0	0	0	5	0	0	0	0	0	0	0
OTU3132	41	0	48	30	0	24	0	0	8	0	0	0	0	0	0	0	0	0	0	0	0	0	0	0	0	0	0	0	0	0	0	0	0	0	0	0	0	0	0	0	0	0	0	0	0	0	0	0	0
OTU3134	0	0	0	0	0	0	0	0	0	0	0	0	8	14	0	0	20	0	0	13	0	29	0	19	0	0	0	0	35	0	0	17	0	0	0	17	0	25	0	0	0	0	0	0	0	0	0	0	0
OTU3137	33	0	0	0	0	0	0	0	21	0	0	0	0	0	0	0	0	0	0	0	47	0	0	0	0	0	0	0	0	0	0	28	0	15	0	0	0	20	0	0	0	0	0	0	0	0	0	0	0
OTU3138	0	0	0	0	0	0	0	0	0	0	0	0	0	0	0	0	0	0	0	0	0	0	0	0	0	0	0	0	0	41	0	0	0	0	0	0	0	0	0	0	0	0	5	0	0	0	0	0	0
OTU3139	0	0	0	0	0	0	0	0	0	0	0	0	18	26	0	0	40	0	0	0	0	0	0	0	0	0	0	0	94	0	0	0	0	0	0	0	0	0	0	0	0	0	0	0	0	0	0	0	0
OTU3144	0	0	0	0	0	0	0	0	0	0	0	0	0	0	0	0	0	0	0	0	0	0	0	0	0	0	0	0	0	0	0	0	0	0	0	0	0	0	0	0	0	0	0	0	0	0	0	0	0
OTU3147	39	0	52	51	0	0	0	0	0	57	0	0	0	0	0	0	0	0	0	0	0	0	0	0	0	0	0	0	10	0	0	0	0	0	0	0	0	0	0	0	0	0	0	0	0	0	0	0	0
OTU3149	0	0	0	0	0	0	0	0	0	0	0	35	33	0	53	40	21	0	0	0	0	0	0	31	26	0	0	0	0	0	0	30	0	33	0	31	0	0	0	0	14	0	0	0	0	0	0	0	0
OTU315	0	46	0	0	271	116	0	0	0	0	0	70	0	0	87	552	0	0	0	0	0	0	0	0	0	0	0	0	0	0	0	0	0	0	0	0	0	0	0	0	0	0	0	0	0	0	0	0	0
OTU3159	0	0	0	0	0	13	0	0	0	0	0	11	0	12	18	11	30	0	0	0	0	0	0	0	8	0	0	0	0	0	0	0	0	0	0	0	0	0	0	0	0	0	0	0	0	0	0	0	0
OTU316	92	19	95	274	24	18	0	50	62	111	23	0	0	0	0	0	0	0	0	0	0	0	0	0	0	0	0	0	0	0	0	0	0	0	0	0	0	0	0	0	0	0	0	0	0	0	0	0	0
OTU3162	15	0	15	43	0	0	0	0	0	28	0	0	0	0	0	0	0	0	0	0	15	0	0	0	0	0	0	0	12	0	0	0	0	0	0	0	0	0	0	0	0	0	32	0	0	0	0	0	0
OTU317	14	0	30	19	14	7	0	20	14	9	12	26	19	11	10	25	33	0	9	0	0	6	0	12	15	11	0	0	51	0	0	0	0	0	0	0	0	0	0	0	0	0	0	0	0	0	0	0	0
OTU3170	0	0	0	0	0	0	0	0	0	0	0	0	0	40	35	0	187	0	0	0	0	0	0	0	0	0	0	0	0	0	0	0	0	0	0	0	0	0	0	0	0	0	0	0	0	0	0	0	0
OTU3171	12	0	12	7	0	0	0	11	10	0	10	0	0	0	0	0	0	0	0	0	0	0	7	0	0	6	5	0	0	0	0	33	8	0	30	0	103	0	69	0	0	0	17	0	292	0	0	0	0
OTU3173	0	0	0	3	0	0	0	0	0	3	0	0	0	0	0	0	0	0	0	0	0	0	0	0	0	0	0	4	0	0	0	0	0	0	0	0	0	0	0	0	0	0	0	0	0	0	0	0	0
OTU3174	0	0	0	0	0	0	0	0	0	0	0	0	0	0	0	0	0	0	0	0	0	0	0	0	0	0	0	0	0	0	0	0	0	0	0	0	0	0	0	0	0	0	0	0	0	0	0	0	0
OTU3176	0	0	0	0	0	0	0	0	0	0	0	0	0	0	0	0	0	0	0	0	0	0	0	0	0	0	0	0	0	0	0	0	0	0	0	0	0	0	0	0	0	0	0	0	0	0	0	0	0
OTU3179	0	0	0	0	0	0	0	0	0	0	0	0	0	0	0	0	0	30	0	26	0	50	0	48	11	0	0	0	0	0	0	25	0	35	0	62	0	64	0	27	0	0	0	0	0	0	0	0	0
OTU3184	0	0	34	48	0	0	0	0	0	12	0	0	0	0	0	0	0	0	0	0	0	0	0	0	0	0	0	0	0	0	0	0	0	0	0	0	0	0	0	0	0	0	0	0	0	0	0	0	0
OTU3185	0	0	0	0	0	0	0	0	26	28	0	0	0	0	0	0	0	0	49	0	29	0	0	0	0	30	0	0	0	0	0	0	0	0	0	0	0	0	0	0	0	0	0	0	0	0	0	0	0
OTU3189	28	0	28	51	0	0	0	29	30	28	0	0	0	0	0	0	0	0	0	0	0	0	0	0	0	0	0	0	0	0	0	0	0	0	0	0	0	0	0	0	0	0	0	0	0	0	0	0	0
OTU319	0	0	0	0	0	0	0	0	0	0	0	0	0	0	0	0	0	0	85	0	169	0	70	0	0	77	54	65	0	0	0	35	0	0	193	0	71	0	30	0	0	0	61	85	88	13	0	0	0
OTU3192	0	0	35	336	0	0	0	0	0	0	0	0	0	0	0	0	0	0	0	0	0	0	0	0	0	0	0	0	0	0	0	0	0	0	0	0	0	0	0	0	0	0	0	0	0	0	0	0	0
OTU3193	0	0	71	174	0	0	0	0	85	0	0	0	0	0	0	0	0	0	0	0	0	0	0	0	0	0	0	0	0	0	0	0	0	0	0	0	0	0	0	0	0	0	0	0	0	0	0	0	0
OTU3194	0	0	0	0	0	0	0	0	0	0	0	0	18	54	0	0	0	0	0	0	0	0	0	0	0	0	0	0	0	0	0	0	0	0	0	0	0	0	0	0	0	0	0	0	0	0	0	0	0
OTU3196	0	0	9	9	0	0	0	0	0	0	0	38	42	45	0	0	78	25	0	0	0	70	0	0	0	0	0	0	0	0	0	0	0	0	0	0	0	0	0	0	0	0	0	0	0	0	0	0	0
OTU3199	0	21	0	0	6	71	0	0	0	32	0	0	0	0	0	0	0	13	0	5	0	318	0	0	0	0	0	0	0	28	0	0	0	0	0	0	0	0	0	0	0	0	0	0	0	0	0	0	0
OTU3201	70	0	74	84	11	0	0	49	0	21	0	0	0	0	0	0	11	0	0	0	0	0	0	0	0	0	0	0	0	0	0	0	0	0	0	0	0	0	0	0	0	0	0	0	0	0	0	0	0
OTU3206	0	0	0	0	0	0	0	0	0	0	0	0	0	0	0	0	0	0	0	0	0	0	0	0	0	0	0	0	0	0	0	0	0	0	0	0	0	0	0	0	0	0	0	0	0	0	0	0	0
OTU321	117	0	46	0	0	0	0	68	0	0	0	0	0	0	0	0	0	0	0	0	0	0	0	0	0	0	0	0	0	0	0	0	0	0	0	0	0	0	0	0	0	0	0	0	0	0	0	0	0
OTU3211	0	0	0	12	7	0	0	6	0	0	0	0	0	6	9	31	15	9	10	10	24	0	0	0	5	0	0	8	0	0	0	0	5	0	0	0	0	0	0	0	0	0	0	0	0	0	0	0	0
OTU3215	0	6	0	0	39	0	0	0	0	0	0	0	0	0	0	16	0	22	0	0	0	0	0	18	23	0	0	0	0	0	0	0	0	49	0	57	0	34	0	0	0	0	0	0	0	0	0	0	0
OTU322	18	0	0	0	0	0	0	121	0	0	28	0	0	0	0	0	0	0	9	0	19	0	24	0	0	24	12	0	0	17	0	14	14	0	0	0	0	0	0	0	0	0	0	195	41	0	0	0	0
OTU3225	0	0	0	0	34	0	31	0	0	0	0	28	0	0	41	0	0	0	0	0	0	42	0	12	0	0	0	0	0	0	0	53	0	0	0	0	0	0	0	0	21	0	0	0	0	0	0	0	0
OTU3226	0	0	0	0	0	0	0	0	0	0	0	0	0	0	0	0	0	0	0	0	0	0	0	0	0	0	0	0	0	0	0	0	0	0	0	0	0	0	0	0	0	0	0	0	0	0	0	0	0
OTU3228	8	0	14	0	0	0	0	11	0	5	0	0	3	0	9	0	0	0	10	0	0	7	0	6	7	10	0	0	0	0	0	18	6	5	0	11	0	0	0	0	0	0	0	0	0	0	0	0	0
OTU3231	25	0	27	65	0	0	0	18	42	0	0	0	0	0	0	0	0	0	0	0	0	0	0	0	0	0	0	0	0	0	0	0	0	0	0	0	0	0	0	0	0	0	0	0	0	0	0	0	0
OTU3237	0	0	0	0	0	0	0	0	0	0	0	0	0	0	0	0	22	0	174	0	109	0	0	0	0	0	0	0	0	0	10	0	0	0	0	0	0	0	0	12	0	0	0	0	0	0	0	0	0
OTU324	45	7	0	37	0	0	0	33	120	185	0	0	0	0	0	0	0	0	0	0	0	0	0	0	0	35	439	45	0	51	0	0	166	0	0	0	0	0	0	0	0	0	0	31	0	0	0	0	0
OTU3240	17	0	29	17	0	0	0	0	0	0	0	0	0	0	0	0	0	0	29	0	34	0	11	0	0	21	0	0	0	0	0	16	0	0	0	0	0	0	22	0	0	0	18	0	0	0	0	0	0
OTU3242	0	0	0	0	17	25	0	0	0	0	0	13	0	0	0	25	22	0	0	15	0	0	0	15	19	0	0	0	0	0	0	0	0	0	0	0	0	0	0	0	0	0	0	0	0	0	0	0	0
OTU3243	0	0	0	0	0	0	0	0	0	0	0	0	0	0	84	89	0	0	0	0	0	0	0	0	0	0	0	0	0	0	0	0	0	0	0	0	0	0	0	0	0	0	0	0	0	0	0	0	0
OTU3249	0	0	0	0	14	24	0	0	0	0	0	0	0	0	0	0	0	0	0	0	0	0	0	0	0	0	0	0	0	0	0	0	0	0	0	0	0	0	0	0	0	0	0	0	0	0	0	0	0
OTU325	66	0	57	47	0	0	0	60	196	97	547	0	0	0	0	0	0	0	0	0	0	0	0	0	0	0	0	0	0	0	0	0	0	0	0	0	0	0	0	0	0	0	0	0	0	0	0	0	0
OTU3251	0	6	0	0	0	0	0	0	0	0	0	9	0	0	35	21	18	0	0	7	0	0	0	0	10	0	0	0	16	0	0	0	0	0	0	0	0	0	0	0	0	0	0	0	0	19	0	0	0
OTU3253	30	0	25	0	13	12	0	17	0	24	0	0	0	0	13	0	0	0	0	0	0	0	0	0	0	0	0	0	0	0	0	0	0	0	0	0	0	0	0	0	0	0	0	0	0	0	0	0	0
OTU3257	0	0	0	0	39	20	0	0	0	0	0	19	12	15	68	40	112	0	0	0	0	0	0	0	67	0	0	0	0	0	0	0	0	0	0	0	0	0	0	0	0	0	0	0	0	0	0	0	0
OTU3259	24	0	24	9	0	0	0	16	0	7	0	12	10	12	0	12	115	0	0	0	0	0	0	0	0	0	0	0	0	0	0	0	0	0	0	0	0	0	0	0	0	0	0	0	0	0	0	0	0
OTU3260	0	0	0	0	0	22	0	0	0	0	0	0	0	0	0	0	0	0	0	0	0	0	0	0	0	0	0	0	0	0	0	0	0	0	0	0	0	0	0	0	0	0	0	0	0	0	0	0	0
OTU3261	61	0	0	54	0	0	0	0	12	44	0	0	0	0	0	0	0	0	0	0	0	0	0	0	0	0	0	0	0	0	0	0	0	0	0	0	0	0	0	0	0	0	0	0	0	0	0	0	0
OTU3262	0	0	0	0	31	0	0	0	0	0	0	31	0	0	0	0	44	0	0	0	0	0	0	0	0	0	0	0	0	0	0	0	0	0	0	0	0	0	0	0	0	0	0	0	0	0	0	0	0
OTU3263	0	0	0	0	7	15	0	0	0	0	0	10	0	16	32	11	12	14	0	18	0	18	0	24	7	0	0	0	11	0	0	0	0	0	0	0	0	0	0	0	0	0	0	0	0	0	0	0	0
OTU3264	0	0	0	0	0	46	0	0	0	0	0	0	26	35	0	0	0	0	0	0	0	0	0	0	0	0	0	0	0	0	0	0	0	0	0	0	0	0	0	0	0	0	0	0	0	0	0	0	0
OTU3266	0	0	0	0	0	5	0	0	0	0	0	0	0	0	0	0	0	0	0	0	0	0	0	0	0	0	0	0	0	0	0	11	0	0	0	0	0	0	0	0	0	0	0	9	8	0	0	0	0
OTU3269	0	34	0	0	33	50	0	0	0	0	0	0	0	0	0	0	0	0	0	0	0	0	0	0	0	0	0	0	0	0	0	0	0	0	0	0	0	0	0	0	0	0	0	0	0	0	0	0	0
OTU3272	0	0	0	42	0	0	0	0	0	14	0	0	0	0	0	0	0	0	0	0	0	0	0	0	0	0	0	0	0	0	0	0	0	0	26	0	33	0	0	0	0	0	0	0	0	0	0	0	0
OTU3276	0	612	0	0	0	3	0	0	0	0	0	4	6	5	4	0	2	0	0	0	0	0	0	0	0	0	0	0	0	0	0	0	0	0	0	0	0	0	0	0	0	0	0	0	0	0	0	0	0
OTU3278	0	0	0	36	0	0	0	43	0	23	0	0	0	0	0	0	0	0	0	0	0	0	0	0	0	0	0	0	0	0	0	0	0	0	0	0	0	0	0	0	0	0	0	0	0	0	0	0	0
OTU3280	0	0	0	0	0	63	0	0	0	0	0	0	0	0	0	0	0	0	0	0	0	0	0	0	0	0	0	0	0	0	0	0	0	0	0	0	0	0	0	0	0	0	0	0	0	0	0	0	0
OTU3286	0	0	13	16	34	28	0	15	0	0	32	0	0	0	0	0	0	0	0	0	0	0	0	0	0	0	0	0	0	0	0	0	0	0	0	0	0	0	0	0	0	0	0	0	0	0	0	0	0
OTU3291	38	0	32	37	0	0	35	0	28	41	0	0	0	0	0	0	0	0	27	0	31	0	22	0	0	35	0	33	0	0	0	15	0	0	58	0	33	0	0	0	37	0	0	0	0	0	0	0	0
OTU3293	0	0	0	0	0	0	0	0	0	0	0	0	0	0	0	0	0	0	0	0	0	0	0	0	0	0	0	0	0	0	0	0	0	0	0	0	0	0	0	0	0	0	0	0	0	0	0	0	0
OTU3294	0	0	0	0	0	0	0	0	0	0	27	0	0	0	0	17	0	0	0	14	0	57	0	23	0	0	0	0	0	0	0	0	0	28	0	0	0	0	0	0	0	0	0	0	0	24	52	25	0
OTU3297	76	0	33	66	0	0	0	0	0	18	0	0	0	0	0	0	0	0	0	0	0	0	0	0	0	0	0	0	0	0	0	0	0	0	0	0	0	0	0	0	0	0	0	0	0	0	0	0	0
OTU3302	39	0	85	26	0	0	0	0	0	0	0	0	0	0	0	0	42	0	0	0	0	0	0	0	0	0	0	0	0	0	0	0	0	0	0	0	0	0	0	0	0	0	0	0	0	0	0	0	0
OTU3307	9	0	0	0	0	0	0	0	0	0	18	0	0	0	0	0	0	0	0	0	0	0	0	0	0	0	15	0	20	0	0	0	0	0	0	0	0	0	0	0	0	30	0	0	18	0	0	0	0
OTU3309	0	0	0	0	0	0	0	0	0	0	0	76	74	41	0	0	0	0	0	0	0	0	0	0	0	0	0	0	0	0	0	0	0	0	0	0	0	0	0	0	0	0	0	0	0	0	0	0	0
OTU3311	9	0	4	0	3	18	0	6	66	5	12	0	0	0	0	0	0	0	0	0	0	0	0	0	0	0	0	0	0	0	0	0	0	0	0	0	0	0	0	0	0	0	0	0	0	0	0	0	0
OTU3312	3	0	0	11	3	7	0	0	4	0	0	0	0	0	0	0	0	0	0	0	0	0	0	0	0	2	0	0	0	0	0	0	0	0	0	0	0	0	0	0	0	0	0	0	0	0	0	0	0
OTU3313	0	0	0	0	16	0	0	9	0	13	0	0	0	0	29	32	0	0	0	0	0	0	0	0	0	0	0	0	0	0	0	0	0	0	0	0	0	0	0	0	0	0	0	0	0	0	0	0	0
OTU3317	0	0	0	0	0	0	0	0	0	0	0	0	0	5	5	16	0	6	0	6	0	12	0	0	18	0	0	0	0	0	0	0	0	7	0	4	0	8	0	0	0	0	0	0	0	0	5	0	0
OTU3319	0	0	7	66	0	0	0	0	0	0	0	0	0	0	0	0	0	0	0	0	0	0	0	0	0	0	0	0	0	0	0	0	0	0	0	0	0	0	0	0	0	0	0	0	0	0	0	0	0
OTU3320	12	0	4	15	0	0	0	0	0	0	0	0	0	0	0	0	0	0	0	0	0	0	0	0	0	0	0	0	0	0	0	0	0	0	0	0	0	0	0	0	0	0	0	0	0	0	0	0	0
OTU3324	0	0	0	31	0	0	0	0	0	0	0	0	0	0	0	0	0	0	0	0	0	0	17	0	0	0	0	0	0	0	0	0	0	0	0	0	0	0	0	0	0	0	0	0	0	0	0	0	0
OTU333	0	4	0	0	0	0	0	0	0	0	0	126	128	572	299	4	0	133	0	54	0	47	0	90	6	0	0	0	33	0	5	87	8	497	0	330	0	551	0	174	0	0	0	0	0	0	6	0	0
OTU3337	5	0	0	14	15	4	0	0	0	0	0	0	0	0	0	0	0	0	0	0	0	0	0	0	0	0	0	0	0	0	0	0	0	0	0	0	0	0	0	0	0	0	0	0	0	0	0	0	0
OTU3338	0	0	18	0	0	0	0	0	0	0	0	0	0	0	0	0	0	0	0	0	0	0	0	0	0	0	0	0	0	0	0	0	0	0	0	0	0	0	0	0	0	0	0	0	0	0	0	0	0
OTU334	0	0	0	0	0	0	0	0	0	0	0	0	0	0	0	0	0	0	0	0	0	0	0	0	0	43	0	9	0	129	0	96	147	0	14	0	53	0	42	7	0	0	100	59	1114	0	0	0	0
OTU3342	8	0	7	0	0	0	0	21	0	0	0	0	0	0	0	0	0	0	21	0	7	0	0	0	0	16	0	55	0	0	0	88	0	0	397	0	0	5	0	0	9	0	0	0	0	0	0	0	0
OTU3346	11	0	10	16	0	0	0	11	6	46	0	17	25	29	0	0	0	0	0	0	0	0	0	0	0	0	0	0	0	0	0	0	0	0	0	0	0	0	0	0	0	0	0	0	0	0	0	0	0
OTU335	79	0	99	99	0	0	25	106	31	79	0	25	0	14	7	0	24	0	35	0	0	0	0	0	0	71	18	268	22	18	12	204	70	0	0	0	0	0	0	0	20	0	0	0	0	0	0	0	0
OTU3352	0	0	0	0	0	0	5	0	0	0	0	0	0	0	0	0	8	0	0	0	0	0	0	0	0	5	0	0	0	0	0	0	0	0	0	0	0	0	0	0	0	0	0	0	0	0	0	0	0
OTU336	171	14	243	158	56	42	0	59	53	88	0	101	97	85	150	119	239	0	0	0	0	0	0	0	0	0	0	0	0	0	0	0	0	0	0	0	0	0	0	0	0	0	0	0	0	0	0	0	0
OTU3367	0	0	0	0	0	0	0	0	0	0	0	0	0	0	0	0	20	0	0	0	0	0	0	0	0	0	0	0	0	0	0	0	0	0	0	0	0	0	0	0	0	0	0	0	0	0	0	0	0
OTU337	79	11	0	80	0	0	0	136	391	152	62	0	0	0	0	0	0	0	86	0	0	0	158	0	4	162	379	124	248	86	0	41	187	0	0	0	0	0	35	0	0	75	111	0	0	0	0	0	0
OTU3372	0	0	0	0	47	0	0	0	0	0	0	0	0	0	0	0	0	0	0	0	0	0	0	0	0	0	0	0	0	0	0	0	0	73	0	0	0	0	0	115	0	0	0	0	0	0	0	67	0
OTU3376	0	0	0	0	0	0	0	0	0	5	0	0	0	0	0	0	0	0	0	0	11	0	17	0	0	28	66	25	0	0	0	0	29	0	0	0	15	0	17	0	0	10	0	0	33	0	0	0	0
OTU3379	0	0	0	0	44	0	0	0	0	0	0	0	0	0	0	0	0	0	0	0	0	0	0	0	0	0	0	0	0	0	42	0	0	0	0	0	0	0	0	0	0	0	0	0	0	0	0	34	0
OTU338	114	0	69	13	10	23	0	52	64	128	0	8	0	0	0	0	26	0	33	0	7	0	13	0	0	41	102	48	12	0	40	53	0	0	123	0	72	11	130	11	0	0	80	0	0	13	0	0	0
OTU3380	40	0	29	0	0	0	0	0	0	0	0	0	0	0	0	0	0	0	0	0	0	0	0	0	0	0	0	0	0	0	0	0	0	0	0	0	0	0	0	0	0	0	0	0	0	0	0	0	0
OTU3385	0	0	0	0	7	0	0	0	0	0	0	22	27	51	0	18	0	0	0	0	0	0	0	0	0	0	0	0	0	0	0	0	0	0	0	0	0	0	0	0	0	0	0	0	0	0	0	0	0
OTU3387	0	0	0	0	240	46	0	0	0	0	0	48	0	0	37	0	0	42	0	20	0	0	0	16	0	0	0	0	94	0	0	0	0	0	0	0	0	0	0	0	0	0	0	0	0	0	0	0	0
OTU3388	0	0	0	0	0	0	0	20	16	11	28	0	0	0	0	0	0	0	0	0	0	0	0	0	0	73	0	0	37	0	0	0	0	0	0	0	0	0	0	0	0	0	0	0	0	0	0	0	0
OTU3390	0	0	0	0	11	0	0	0	0	0	0	0	0	7	0	39	0	18	0	15	0	0	0	0	0	0	0	0	26	0	5	23	0	0	0	0	0	0	0	0	19	0	0	0	0	16	21	52	0
OTU3392	0	0	0	0	0	0	0	0	0	0	0	24	53	55	35	0	66	31	0	31	0	24	0	39	0	0	0	0	0	0	0	0	0	0	0	0	0	0	0	0	0	0	0	0	0	0	0	0	0
OTU3399	0	96	0	54	8	95	0	25	23	27	6	0	6	31	41	5	0	5	4	8	0	0	0	0	0	8	0	0	15	0	0	0	0	0	0	0	0	0	0	0	0	0	0	0	0	0	0	0	0
OTU3400	0	0	0	0	0	0	0	0	0	0	0	40	18	0	14	0	26	0	0	0	0	0	0	0	18	0	0	0	0	0	8	32	0	20	0	17	0	0	0	7	0	0	0	0	0	0	0	0	0
OTU3402	0	0	0	28	0	0	0	40	0	41	0	0	0	0	0	0	0	0	0	0	0	0	0	0	0	0	0	27	11	0	17	0	0	0	0	0	0	0	0	0	0	0	0	0	0	0	0	0	0
OTU3403	0	0	0	5	0	0	0	0	0	0	0	10	7	28	0	0	0	0	0	0	0	0	0	0	0	0	0	0	0	0	0	0	0	0	0	0	0	0	0	0	0	0	0	0	0	0	0	0	0
OTU3406	73	0	95	52	0	0	0	17	10	0	0	0	0	0	0	0	0	0	0	0	0	0	0	0	0	0	0	0	0	0	0	0	0	0	0	0	0	0	0	0	0	0	0	0	0	0	0	0	0
OTU3408	8	0	12	24	0	0	0	17	0	0	0	24	0	41	27	0	27	0	0	14	0	17	15	0	11	0	0	0	0	9	0	30	0	0	0	0	0	18	0	0	26	0	0	0	0	0	0	0	0
OTU3409	21	3	20	9	15	0	0	0	49	0	7	0	0	0	0	0	0	0	0	0	0	0	0	0	0	0	0	0	0	0	0	0	0	0	0	0	0	0	0	0	0	0	0	0	0	0	0	0	0
OTU3411	0	0	0	0	10	0	15	0	0	0	0	0	0	10	6	0	18	7	0	0	0	0	0	13	0	0	0	0	9	0	0	29	0	18	0	22	0	19	0	0	4	0	0	0	0	7	6	14	0
OTU3416	0	0	11	0	44	14	0	0	0	0	0	0	0	28	62	0	104	15	0	10	0	74	0	35	0	0	0	0	0	0	0	0	0	0	0	0	0	0	0	0	0	0	0	0	0	0	0	0	0
OTU3418	0	0	0	0	0	0	0	0	0	0	0	0	0	0	0	0	0	0	0	0	0	0	0	0	0	0	0	0	0	0	0	32	0	30	0	35	0	82	0	0	0	0	329	0	0	0	0	0	0
OTU342	0	0	21	32	0	0	0	0	0	36	0	0	0	0	0	0	0	0	0	0	0	0	0	0	0	0	0	0	0	124	0	66	22	0	46	0	35	0	0	0	0	0	0	0	0	0	0	0	0
OTU3421	25	0	25	13	0	0	5	0	0	28	51	0	0	0	0	0	0	0	13	0	12	0	21	0	0	28	23	0	0	0	0	36	0	0	0	0	0	0	0	0	0	0	0	0	0	0	0	17	22
OTU3423	0	0	0	0	38	37	31	0	0	0	0	31	0	0	23	29	0	0	0	0	0	0	0	0	0	0	0	0	9	0	0	47	0	14	0	0	0	18	0	0	35	0	0	0	0	0	0	0	0
OTU3426	0	0	0	0	20	0	0	0	0	0	0	15	0	0	8	29	0	30	0	18	0	12	0	0	21	0	0	0	13	0	10	0	0	23	0	12	0	20	0	10	36	0	0	0	0	0	0	10	0
OTU3434	0	0	19	0	7	0	0	13	14	0	38	0	0	0	0	0	0	0	0	0	0	0	0	0	0	0	0	22	12	0	16	0	14	0	35	0	15	0	5	0	0	0	0	0	0	0	7	0	0
OTU3436	0	0	0	0	0	0	0	0	0	0	0	71	92	0	46	40	37	0	0	0	0	13	0	28	0	0	0	0	0	0	0	0	0	0	0	0	0	0	0	0	0	0	0	0	0	0	0	0	0
OTU3437	0	0	4	13	0	0	0	0	0	3	0	0	0	0	0	0	0	0	3	0	0	0	3	0	0	0	3	3	0	0	3	10	4	0	0	0	0	0	0	0	0	0	0	0	0	0	0	0	0
OTU3443	0	8	0	0	10	0	0	0	0	0	0	11	12	7	14	0	12	6	0	4	0	0	0	9	0	0	0	0	35	0	0	9	0	11	0	11	0	16	0	30	8	0	0	0	0	11	19	19	8
OTU3445	0	6	0	0	0	23	0	0	0	0	0	21	27	26	16	11	21	0	0	0	0	0	0	0	0	0	0	0	0	0	0	0	0	0	0	0	0	0	0	0	0	0	0	0	0	0	0	0	0
OTU3449	0	0	0	0	0	0	0	0	0	0	0	11	0	0	0	0	0	0	0	0	0	0	0	0	0	0	0	0	0	0	0	0	0	0	0	0	0	0	0	0	0	0	0	0	0	0	0	0	0
OTU3453	0	0	0	0	0	0	0	0	0	0	0	0	0	0	0	0	0	0	0	0	10	0	0	0	0	0	0	0	0	0	0	0	0	22	19	15	0	0	0	0	32	0	0	0	0	0	33	0	0
OTU3454	0	0	0	0	0	0	0	0	0	0	0	82	128	253	0	0	0	0	0	0	0	0	0	0	0	0	0	0	0	0	0	0	0	33	0	43	0	0	0	0	0	0	0	0	0	0	0	0	0
OTU3456	0	0	0	0	0	0	0	0	0	0	0	0	0	0	0	0	0	0	0	0	0	0	0	0	0	0	0	0	0	0	0	0	0	0	0	0	0	0	0	0	0	0	0	0	0	0	0	0	0
OTU3459	0	0	0	0	31	94	0	0	0	0	0	19	46	0	56	64	0	0	0	0	0	0	0	0	0	0	0	0	0	0	0	0	0	0	0	0	0	0	0	0	0	0	0	0	0	0	0	0	0
OTU3465	22	0	32	23	28	9	0	0	0	0	0	0	24	20	0	0	0	0	0	0	0	0	0	0	0	0	0	0	0	0	0	0	0	0	0	0	0	0	0	0	0	0	0	0	0	0	0	0	0
OTU3466	6	5	3	0	0	0	0	7	4	0	126	0	0	0	0	0	0	0	5	0	0	0	5	0	0	12	12	0	58	0	0	0	22	0	0	0	0	0	0	0	0	20	0	0	0	0	0	0	0
OTU3467	0	0	0	0	0	0	0	24	38	0	47	0	0	0	0	0	0	0	0	0	0	27	23	0	0	27	0	19	0	0	0	0	0	0	8	0	15	0	0	0	0	0	0	0	0	0	0	0	0
OTU3471	0	0	0	0	18	35	22	0	0	0	0	18	20	12	15	17	30	15	0	0	0	10	0	11	23	0	0	0	17	0	12	67	0	30	0	19	0	6	0	11	45	0	0	0	12	0	0	0	0
OTU3476	0	0	0	0	9	0	0	0	0	0	0	0	0	0	0	0	0	0	0	0	0	0	0	0	0	0	0	0	0	0	0	0	0	0	0	0	0	0	0	0	0	0	0	0	0	0	0	0	0
OTU3480	34	0	24	31	0	0	0	47	0	35	0	0	0	0	0	0	13	0	0	0	0	0	0	0	0	0	0	0	0	0	0	0	0	0	0	0	0	0	0	0	0	0	0	0	0	0	0	0	0
OTU3481	0	0	0	0	19	0	9	0	0	0	0	0	0	0	16	0	0	0	0	0	0	0	0	0	18	0	0	0	22	0	0	0	0	0	0	0	0	11	0	0	0	0	0	0	0	0	0	0	0
OTU3487	0	0	0	0	0	0	0	0	0	0	0	0	0	0	0	0	0	0	0	4	0	0	0	0	0	0	0	0	0	0	0	0	0	0	0	0	0	0	0	0	0	0	0	0	0	0	0	0	0
OTU3494	0	0	0	0	22	164	0	0	0	0	0	0	0	0	0	0	0	0	0	0	0	0	0	0	0	0	0	0	55	0	0	0	0	0	0	0	0	0	0	0	0	0	0	0	0	0	0	0	0
OTU3498	19	0	19	0	0	0	0	0	0	0	0	0	0	0	0	0	0	0	10	0	15	0	18	0	0	0	0	12	0	0	0	0	0	16	0	6	0	0	0	10	14	0	0	0	0	0	0	0	0
OTU3503	0	0	0	0	7	0	0	0	0	0	0	0	0	0	0	0	0	0	0	0	0	0	0	0	0	0	0	0	0	0	0	0	0	0	0	0	0	0	0	0	0	0	0	0	0	0	0	0	0
OTU3506	13	0	45	65	0	0	0	16	10	0	0	0	0	0	0	0	0	0	0	0	0	0	0	0	0	0	0	0	0	0	0	0	0	0	0	0	0	0	0	0	0	0	0	0	0	0	0	0	0
OTU3509	8	0	13	14	21	0	0	13	0	33	0	8	0	0	13	12	15	0	14	0	12	0	0	5	9	0	0	9	0	0	0	38	0	0	29	16	13	17	55	10	19	0	22	0	0	8	0	18	29
OTU351	0	31	46	48	57	87	0	0	39	65	34	113	108	146	57	38	39	66	0	60	0	75	0	37	32	0	0	0	0	0	0	0	0	0	0	0	0	0	0	0	0	0	0	0	0	0	0	0	0
OTU3510	0	0	0	0	10	0	0	0	0	0	0	8	7	0	6	0	9	12	0	16	0	10	0	0	0	0	0	0	22	0	0	0	0	0	0	0	0	0	0	0	0	0	0	0	0	0	0	0	0
OTU3511	0	0	0	9	0	0	0	0	0	0	0	0	0	0	0	0	0	0	8	0	0	0	3	0	0	0	0	0	0	0	0	0	0	0	0	0	0	0	0	0	0	0	0	0	0	0	0	0	0
OTU3515	32	0	39	50	22	0	0	4	0	13	0	0	0	0	37	20	0	0	0	0	0	0	0	0	0	0	0	0	0	0	0	0	0	0	0	0	0	0	0	0	0	0	0	0	0	0	0	0	0
OTU3517	18	0	19	26	0	0	0	6	0	76	0	0	0	0	0	0	0	0	0	0	0	0	0	0	0	0	0	0	0	0	0	0	0	0	0	0	0	0	0	0	0	0	0	0	0	0	0	0	0
OTU3518	0	0	0	0	0	0	0	0	0	0	0	0	0	0	19	0	185	0	0	0	0	0	0	0	0	0	0	0	0	0	0	0	0	0	0	0	0	0	0	0	0	0	0	0	0	0	0	0	0
OTU3519	23	0	25	38	0	0	0	0	20	0	0	0	0	0	0	0	0	0	0	0	0	0	0	0	0	0	0	0	0	0	0	0	0	0	0	0	0	0	0	0	0	0	0	0	0	0	0	0	0
OTU3521	0	0	0	0	65	0	0	0	0	0	0	51	46	0	0	0	70	0	0	0	0	0	0	0	0	0	0	0	33	0	35	0	5	34	0	33	0	0	0	0	0	0	0	0	0	0	35	105	0
OTU3522	0	0	0	0	16	18	0	0	0	0	0	0	0	0	0	0	0	0	0	0	0	0	0	0	0	0	0	0	0	0	0	0	0	0	0	0	0	0	0	0	0	0	0	0	0	0	0	0	0
OTU3525	0	0	0	0	0	0	0	0	0	0	0	0	21	0	24	17	0	35	0	6	0	10	0	20	42	0	0	0	0	0	0	0	0	0	0	0	0	0	0	0	0	0	0	0	0	0	0	0	0
OTU353	12	0	10	19	16	0	0	16	0	0	0	0	0	0	0	0	0	0	13	0	0	0	0	0	0	0	0	0	0	0	0	0	0	16	0	0	0	0	0	0	0	0	0	105	21	0	0	32	0
OTU3532	0	0	0	0	22	17	0	0	0	0	0	0	0	0	0	0	0	0	0	0	0	0	0	0	0	0	0	0	0	0	0	0	0	0	0	0	0	0	0	0	0	0	0	0	0	0	0	0	0
OTU3535	24	0	0	57	0	5	9	20	21	0	0	0	0	0	0	0	0	0	0	0	26	0	24	0	0	32	11	0	0	0	0	47	0	0	35	0	46	0	15	0	0	0	20	0	0	0	5	0	0
OTU3537	0	0	0	0	0	0	0	0	0	0	0	0	0	0	0	0	0	0	0	0	0	0	0	0	0	0	0	0	0	0	0	0	0	0	0	0	0	0	0	0	0	0	0	0	0	0	0	0	0
OTU3539	0	0	0	0	8	0	0	0	0	0	0	16	0	7	0	0	9	0	0	0	0	0	0	9	0	0	0	0	0	0	0	16	0	9	0	10	0	17	0	0	29	0	0	0	0	0	18	0	0
OTU3544	0	0	0	14	0	0	0	0	0	5	0	0	0	0	0	0	0	0	0	0	0	0	0	0	0	0	0	28	0	0	0	50	0	0	0	0	0	0	0	0	33	0	0	0	0	0	0	0	0
OTU355	0	14	3	6	52	10	0	0	10	0	5	36	24	104	35	0	69	60	22	30	27	189	29	21	0	0	0	0	81	0	43	82	0	188	0	201	0	0	0	206	0	0	0	0	0	0	0	0	0
OTU3550	0	0	0	0	0	0	0	0	0	0	0	0	0	0	0	0	0	0	0	0	0	0	0	0	0	0	5	0	0	0	0	0	0	0	0	0	0	0	0	0	0	0	0	0	0	0	0	0	0
OTU3553	0	0	0	0	0	0	0	0	0	0	0	0	0	0	0	0	0	20	0	20	0	18	0	15	53	0	0	0	0	0	0	65	0	0	0	0	0	0	0	0	43	0	0	0	0	0	26	234	0
OTU3563	39	0	57	0	0	0	0	55	0	0	0	0	0	0	0	0	0	0	0	0	0	0	0	0	0	0	0	0	0	0	0	0	0	0	0	0	0	0	0	0	0	0	0	0	0	0	0	0	0
OTU357	32	0	18	18	0	0	0	21	15	34	0	0	0	0	0	0	0	0	7	0	0	0	9	0	0	78	200	7	0	195	0	86	26	0	0	0	0	0	0	0	0	0	0	0	0	0	0	0	0
OTU3571	57	0	0	0	0	0	0	0	58	0	0	0	0	0	0	0	0	0	0	0	0	0	0	0	0	0	7	0	25	10	0	0	0	0	0	0	0	0	0	0	0	0	0	0	0	0	0	0	0
OTU3574	0	0	0	0	0	0	0	0	0	0	0	0	0	0	0	0	0	0	0	0	0	0	0	0	0	0	0	0	0	0	0	0	0	0	0	0	0	0	0	0	0	0	0	0	0	0	0	0	0
OTU358	40	6	43	45	22	11	0	28	27	16	0	41	27	58	37	25	62	0	0	0	0	0	0	0	0	0	0	0	0	0	0	0	0	0	0	0	0	0	0	0	0	0	0	0	0	0	0	0	0
OTU3580	0	0	0	0	11	0	0	0	0	0	0	14	26	36	0	0	26	0	0	20	0	18	0	0	0	0	0	0	0	0	0	18	0	16	0	26	0	15	0	0	0	0	0	0	0	0	0	23	11
OTU3586	22	0	18	0	0	0	0	30	0	8	0	0	0	0	0	0	0	0	0	0	24	0	0	0	0	9	0	0	0	0	0	0	0	0	0	0	0	0	15	0	0	0	93	0	0	0	0	0	0
OTU3587	12	29	0	0	0	263	0	101	0	0	0	0	0	0	142	0	0	0	0	0	5	0	0	0	0	0	0	0	0	0	0	0	0	0	0	0	0	0	0	0	0	0	0	0	0	0	0	0	0
OTU3589	41	0	21	40	0	0	0	0	43	0	0	0	0	0	0	0	0	0	0	0	0	0	0	0	0	0	11	0	0	0	0	0	0	0	123	0	75	0	4	0	0	0	17	0	0	0	0	0	0
OTU359	0	18	0	0	0	0	0	52	0	53	25	0	0	0	0	0	55	0	80	0	74	0	70	0	0	62	27	59	118	0	132	103	0	0	0	0	0	0	0	0	0	0	0	0	0	0	0	0	0
OTU3595	11	0	25	28	12	7	0	15	16	16	0	0	0	0	0	0	0	0	18	0	21	0	9	0	0	24	6	13	8	0	13	57	0	0	0	0	0	20	0	12	25	0	0	0	19	0	0	0	0
OTU3596	0	0	0	0	22	0	0	0	0	0	0	0	0	0	0	31	0	0	0	0	0	0	0	19	21	0	0	0	0	0	20	55	0	0	0	15	0	0	0	0	26	0	0	0	0	0	0	0	0
OTU3602	0	0	0	25	0	0	0	0	0	16	0	0	0	0	0	0	0	0	0	0	0	0	0	0	0	0	9	13	0	15	0	21	0	0	0	0	0	0	0	0	0	0	0	0	0	0	0	0	0
OTU3611	0	0	0	0	0	0	0	0	0	0	0	0	0	0	0	0	0	0	0	0	0	0	0	0	0	0	0	0	0	0	0	0	0	0	0	0	0	0	0	0	0	0	0	0	0	0	0	0	0
OTU3612	0	581	0	4	0	2	0	0	0	0	0	0	5	0	0	0	0	0	0	0	0	0	0	0	0	0	0	0	0	0	0	0	0	0	0	0	0	0	0	0	0	0	0	0	0	0	0	2	0
OTU3613	10	0	0	14	0	0	0	10	0	0	0	0	0	0	0	0	0	0	0	0	6	0	0	0	0	0	8	0	0	0	0	0	12	0	0	0	0	0	0	0	0	0	0	0	0	0	0	0	0
OTU3616	0	0	0	0	11	6	0	0	0	0	0	14	0	25	17	6	0	5	0	10	0	0	0	0	35	0	0	0	20	0	0	0	0	0	0	0	0	0	0	0	0	0	0	0	0	0	0	0	0
OTU3617	21	0	0	15	0	0	0	0	0	0	0	0	0	0	0	0	8	0	8	0	4	0	0	24	0	0	0	0	0	0	0	32	0	28	22	29	0	41	43	0	0	0	0	0	0	4	6	48	0
OTU362	18	0	0	0	0	0	0	0	0	35	0	0	0	0	0	0	0	0	0	0	0	0	0	0	0	0	0	0	0	0	0	0	0	0	0	0	0	0	0	0	0	0	0	0	0	0	0	0	0
OTU3622	0	0	0	20	10	16	0	0	0	0	0	6	0	12	0	29	50	0	0	0	0	0	0	0	0	0	0	0	0	0	0	0	0	0	0	0	0	0	0	0	0	0	0	0	0	0	0	0	0
OTU3628	0	0	0	0	0	16	0	0	0	0	0	0	0	0	0	0	0	0	0	0	0	0	0	14	13	0	0	0	12	0	0	0	0	17	0	24	0	6	0	15	0	0	0	0	0	0	0	0	0
OTU3633	0	0	0	0	0	0	0	0	16	0	5	0	0	0	0	0	0	0	0	0	0	0	0	0	0	0	0	0	0	0	0	0	0	0	0	0	0	0	0	0	0	0	0	0	0	0	0	0	0
OTU3634	0	24	0	0	23	6	0	0	0	0	0	61	39	0	0	0	41	0	0	0	0	0	0	0	0	0	0	0	0	0	0	0	0	0	0	0	0	0	0	0	0	0	0	0	0	0	0	0	0
OTU3637	0	0	0	0	19	0	0	0	0	0	0	23	0	0	0	0	0	0	0	0	0	0	0	12	0	0	0	0	0	0	18	13	0	14	0	16	0	19	0	29	5	0	0	0	0	0	0	18	13
OTU3641	0	0	0	0	0	0	0	0	0	0	0	0	0	0	0	0	0	0	0	0	0	0	0	0	0	0	0	0	0	0	0	0	0	0	0	0	0	0	0	0	0	0	0	0	0	0	0	0	0
OTU3643	37	0	57	0	0	0	0	0	0	0	0	0	0	0	0	0	0	0	16	0	0	0	0	0	0	12	0	0	92	0	0	0	0	0	0	0	0	0	0	0	0	0	0	0	0	0	0	0	0
OTU3645	0	0	0	0	0	0	0	0	0	0	0	24	40	19	0	22	45	20	0	20	0	0	0	0	0	0	0	0	0	0	0	0	0	0	0	0	0	0	0	0	0	0	0	0	0	0	0	25	0
OTU3646	25	0	35	17	0	7	0	0	22	12	19	0	0	0	0	0	0	0	18	0	18	0	8	0	0	0	0	0	10	0	0	37	0	0	9	0	5	0	14	0	0	0	15	0	60	0	0	0	0
OTU3651	0	0	0	0	0	9	0	0	0	0	0	0	0	0	0	0	0	0	0	0	0	0	0	0	0	0	0	0	0	0	0	0	0	0	0	0	0	0	0	0	0	0	0	0	0	0	0	0	0
OTU3652	0	0	0	0	45	0	0	0	0	0	0	0	53	0	38	49	0	37	0	41	0	30	0	0	31	0	0	0	34	0	0	0	0	0	0	0	0	0	0	0	0	0	0	0	0	0	0	0	0
OTU3654	0	7	0	0	13	30	0	0	0	0	0	0	0	0	20	0	0	16	0	0	0	0	0	0	0	0	0	0	26	0	0	24	0	16	0	20	0	0	0	22	0	0	0	0	0	17	0	23	15
OTU366	49	0	51	76	54	18	0	44	34	0	0	0	0	0	0	0	0	0	0	0	0	0	0	0	0	0	0	0	0	0	0	0	0	0	0	0	0	0	0	0	0	0	0	0	0	0	0	0	0
OTU3660	40	0	0	28	0	0	0	11	0	0	0	0	0	0	0	0	0	0	0	0	22	0	0	0	0	18	0	0	9	0	0	33	0	0	74	0	29	13	14	0	11	0	0	0	0	0	0	0	0
OTU3665	0	0	0	0	0	0	14	0	0	0	0	0	0	72	0	0	0	0	0	0	0	0	0	0	0	0	0	0	0	0	0	0	0	0	43	0	64	0	33	0	0	0	0	0	18	0	0	0	0
OTU3672	8	0	7	0	19	0	0	0	0	0	0	16	12	13	15	0	0	0	0	0	0	0	0	14	0	0	0	0	0	0	0	0	0	0	0	0	0	0	0	0	0	0	0	0	0	0	0	0	0
OTU3673	0	0	0	0	0	0	0	0	0	0	0	13	0	27	17	9	0	0	0	0	0	0	0	0	0	0	0	0	90	0	0	0	0	0	0	0	0	0	0	0	0	0	0	0	0	0	0	0	0
OTU3675	0	0	0	0	21	20	37	0	0	0	0	23	0	0	28	21	45	0	0	0	0	0	0	13	18	0	0	0	22	0	15	22	0	0	0	0	0	0	0	0	0	0	0	0	0	0	0	0	0
OTU3683	0	0	0	0	0	6	2	0	0	0	0	0	0	0	0	13	0	0	8	0	11	0	20	6	0	8	0	0	0	0	4	0	0	6	15	8	10	5	4	0	0	0	0	0	0	4	12	0	0
OTU3684	0	0	0	0	0	0	0	0	0	0	0	0	0	5	0	0	0	0	0	0	0	0	0	0	0	0	0	0	0	0	0	0	0	7	0	0	0	0	0	5	0	0	0	13	0	0	0	0	0
OTU3688	41	0	26	0	0	0	0	0	23	0	0	0	0	0	0	0	0	0	24	0	0	0	0	0	0	0	33	0	0	0	0	0	0	0	0	0	14	0	0	0	0	0	0	173	0	0	0	0	0
OTU369	0	0	0	8	0	0	0	134	0	15	0	0	0	0	0	0	0	0	35	0	142	0	9	0	0	13	0	100	58	9	191	73	6	0	63	0	400	29	31	0	0	0	243	0	0	0	0	0	0
OTU3692	0	0	0	30	0	13	0	0	9	0	0	0	0	0	0	25	0	0	0	0	15	0	0	0	0	0	0	0	0	0	0	0	0	0	0	0	0	0	0	0	0	0	0	0	0	0	0	0	0
OTU3696	16	0	17	8	0	0	0	8	0	9	0	0	0	0	0	0	0	0	0	0	15	0	0	0	0	0	13	10	0	41	0	0	18	0	0	0	0	0	0	0	0	0	0	0	0	0	0	0	0
OTU3698	0	0	0	0	31	0	0	0	0	0	0	23	34	0	19	0	16	0	0	0	0	0	0	0	0	0	0	0	18	0	22	25	0	0	0	0	0	0	0	29	42	0	0	0	0	0	0	0	0
OTU370	29	0	0	49	17	19	0	0	30	0	0	0	0	22	17	32	50	0	0	15	0	28	0	17	0	16	0	0	31	0	0	24	0	0	0	0	0	0	0	0	0	0	0	0	0	0	0	0	0
OTU3709	15	0	0	44	0	0	0	0	0	12	0	0	0	0	0	0	0	0	0	0	14	0	12	0	0	7	8	15	0	0	0	0	23	0	0	0	0	0	0	0	0	0	0	0	0	0	0	0	0
OTU371	70	0	94	111	0	0	0	36	22	0	0	0	0	0	0	0	0	0	0	0	0	0	0	0	0	0	0	0	0	0	0	0	0	0	0	0	0	0	0	0	0	0	0	0	0	0	0	0	0
OTU3710	0	0	11	19	0	10	0	8	14	0	21	6	0	11	0	0	0	0	25	0	21	8	0	6	0	7	0	0	8	0	0	31	0	11	8	4	0	15	0	0	10	0	0	0	10	0	18	6	4
OTU3713	0	0	0	0	2	21	0	0	0	0	0	0	0	0	0	0	0	0	0	0	0	0	0	0	0	0	0	0	0	0	0	0	0	0	0	0	0	0	0	0	0	0	0	0	0	0	0	0	0
OTU3717	0	0	0	46	13	0	0	0	0	0	0	0	0	0	0	0	0	0	0	0	0	0	0	0	0	0	0	0	0	0	0	0	0	0	0	0	0	0	0	0	0	0	0	0	0	0	0	0	0
OTU372	0	0	0	0	0	0	0	0	0	0	0	0	0	0	0	0	0	0	0	0	0	0	0	0	0	0	0	0	0	0	0	0	0	0	0	0	0	0	0	0	0	0	0	0	0	0	0	0	0
OTU3721	85	0	82	15	0	0	0	9	0	12	0	0	0	0	0	0	0	0	0	0	0	0	0	0	0	0	0	0	0	0	0	0	0	0	0	0	0	0	0	0	0	0	0	0	0	0	0	0	0
OTU3726	0	0	0	0	10	22	0	0	0	0	0	17	24	30	6	28	8	7	0	0	0	0	0	6	13	0	0	0	9	0	22	32	0	11	0	8	0	0	0	0	26	0	0	0	0	12	0	9	16
OTU3736	18	0	15	14	0	0	0	0	0	0	0	0	0	0	0	0	0	0	0	0	0	0	0	0	0	0	0	0	0	0	0	0	0	0	0	0	0	0	0	0	0	0	0	0	0	0	0	0	0
OTU3739	0	0	0	0	0	0	0	0	0	0	0	35	35	65	0	0	42	0	0	0	0	0	0	0	0	0	0	0	46	0	28	38	0	0	0	0	0	0	0	0	0	0	0	0	0	0	22	0	0
OTU3741	0	0	0	0	0	0	0	0	0	0	7	0	0	0	0	0	0	0	0	0	0	0	0	0	0	0	0	3	6	0	0	0	0	0	3	0	4	0	0	0	0	0	0	0	0	0	0	0	0
OTU3742	20	0	68	16	0	0	0	0	0	0	0	0	0	0	0	0	0	0	0	0	0	0	0	0	0	0	0	0	0	0	0	0	0	0	0	0	0	0	0	0	0	0	0	0	0	0	0	0	0
OTU3743	0	0	0	7	10	0	0	0	0	0	0	0	0	0	0	0	0	0	0	0	0	0	0	0	0	0	0	0	12	0	0	0	0	0	0	0	0	0	0	0	0	0	0	0	0	0	0	0	0
OTU3744	0	0	0	0	9	5	0	0	5	0	8	9	7	0	4	0	6	0	0	5	0	0	0	0	0	0	0	0	0	0	0	0	0	0	0	0	0	0	0	0	0	0	0	0	0	0	0	0	0
OTU3748	0	8	0	0	16	18	0	0	0	0	0	23	15	0	16	0	0	0	0	0	0	0	0	0	0	0	0	0	0	0	0	0	0	0	0	0	0	0	0	0	0	0	0	0	0	0	0	0	0
OTU375	0	12	0	0	30	20	0	0	0	0	0	16	29	16	33	45	52	12	0	0	0	0	0	26	23	0	0	0	39	0	0	0	0	0	0	0	0	0	0	0	0	0	0	0	0	0	0	0	0
OTU3753	0	0	0	0	17	40	27	0	0	0	0	41	41	23	36	42	33	0	0	0	0	0	0	22	0	0	0	0	24	0	22	20	0	29	0	17	0	17	0	19	37	0	0	0	19	0	0	0	0
OTU3756	0	0	38	54	0	0	0	0	0	0	0	0	0	0	0	0	0	0	0	0	0	0	0	0	0	0	0	64	0	0	0	0	0	0	88	0	51	0	0	0	0	0	0	0	0	0	0	0	0
OTU3757	0	0	0	0	0	44	16	0	0	0	0	0	0	0	0	0	0	0	0	0	0	0	0	0	0	0	0	0	0	0	32	39	0	0	0	26	0	38	0	0	0	0	0	0	0	0	0	0	31
OTU3759	0	0	0	0	0	0	0	0	0	0	0	0	0	0	0	0	0	0	0	0	0	31	0	0	0	0	0	0	0	0	0	0	0	0	0	0	0	0	0	0	12	0	0	0	0	0	38	24	0
OTU376	13	0	0	0	0	0	0	0	12	10	49	0	0	0	0	0	0	0	0	0	40	0	24	0	0	18	0	28	0	126	0	61	111	0	137	0	84	0	74	0	0	75	0	70	0	0	0	0	0
OTU3763	0	0	0	19	0	0	0	0	0	24	0	0	0	0	0	0	0	0	6	0	9	0	0	0	0	17	27	0	0	0	0	0	0	0	35	0	87	0	0	0	0	0	0	0	0	0	0	0	0
OTU3767	0	0	0	0	0	0	0	0	0	0	0	0	0	0	0	0	0	0	0	0	0	0	0	0	0	0	0	0	0	0	0	0	0	0	0	0	0	0	0	0	0	0	0	0	0	0	0	0	0
OTU3770	17	0	0	12	0	10	0	0	10	0	0	0	0	0	0	0	0	0	11	0	15	0	0	0	0	0	10	0	0	16	0	0	11	0	0	0	0	0	0	0	0	0	8	0	0	0	0	0	0
OTU3771	0	0	0	0	25	32	0	0	0	0	0	16	14	20	28	33	37	0	0	15	0	0	0	24	19	0	0	0	16	0	0	25	0	17	0	12	0	0	0	29	37	0	0	0	0	0	0	0	0
OTU3772	0	0	0	0	0	3	0	0	0	0	0	0	0	0	0	0	0	0	0	0	0	0	0	0	0	0	0	0	0	0	0	0	0	0	0	0	0	0	0	0	0	0	0	0	0	0	0	0	0
OTU3774	0	0	0	0	0	0	0	0	0	0	0	0	0	0	0	0	0	0	0	0	0	0	0	0	0	0	0	0	0	0	0	0	0	0	0	0	0	0	0	0	0	0	0	0	0	0	0	0	0
OTU3775	0	0	0	0	0	0	14	0	0	12	0	0	0	0	0	0	0	11	0	0	0	0	14	12	0	0	0	11	0	0	0	0	8	0	0	0	0	0	0	0	0	0	0	0	0	0	0	0	0
OTU3776	0	0	0	0	42	43	0	0	0	0	0	11	27	10	0	10	0	0	0	0	0	0	0	0	0	0	0	0	15	0	14	23	0	39	0	27	0	12	0	29	40	0	0	0	0	0	0	6	11
OTU3780	0	0	0	0	0	0	0	78	0	0	98	0	0	0	0	0	0	0	0	0	0	0	0	0	0	0	0	0	0	0	0	0	0	0	0	0	0	0	0	0	0	0	0	0	0	0	0	0	0
OTU3781	16	0	0	17	0	0	0	0	0	0	9	0	0	0	0	0	0	0	0	0	0	0	0	0	0	0	0	0	0	0	0	0	0	0	0	0	0	0	0	0	0	0	0	0	0	0	0	0	0
OTU3782	0	11	0	0	20	0	0	0	0	0	0	0	18	20	0	25	33	0	0	0	0	0	0	0	0	0	0	0	0	0	0	0	0	0	0	0	0	0	0	0	0	0	0	0	0	0	0	0	0
OTU3785	0	0	0	0	0	0	0	0	0	0	0	0	0	0	0	0	0	0	0	0	0	0	0	0	0	0	0	0	0	0	0	0	0	0	0	0	0	35	7	41	0	0	0	0	0	0	38	52	30
OTU3786	0	0	0	0	10	0	0	0	0	0	0	11	13	39	34	43	45	0	0	0	0	0	0	0	0	0	0	0	0	0	0	0	0	0	0	0	0	0	0	0	0	0	0	0	0	0	0	0	0
OTU3792	26	0	24	45	0	0	0	0	15	0	0	0	0	0	0	0	0	0	0	0	0	0	0	0	0	0	0	0	0	0	0	0	0	0	0	0	0	0	0	0	0	0	0	0	0	0	0	0	0
OTU3794	0	0	0	0	14	6	0	51	0	0	0	46	86	64	12	70	16	0	0	0	0	0	0	0	0	0	0	0	0	0	0	0	0	0	0	0	0	0	0	0	0	0	0	0	0	0	0	0	0
OTU3799	0	0	0	0	15	23	0	0	0	0	12	0	0	0	31	0	33	0	0	0	0	0	0	0	0	0	0	0	0	0	0	0	0	0	0	0	0	0	0	0	0	0	0	0	0	0	0	0	0
OTU38	496	34	577	465	249	321	168	244	198	153	126	237	211	266	322	309	729	409	679	66	227	292	409	231	166	225	142	370	371	82	227	543	51	442	346	437	250	366	381	358	515	0	311	8	275	174	217	607	128
OTU380	0	0	0	0	0	0	0	0	0	0	0	0	0	0	0	0	0	0	0	0	0	0	0	0	0	0	0	0	0	0	0	0	0	0	0	0	0	0	0	0	0	0	0	0	0	0	0	0	0
OTU3808	15	0	18	13	32	0	0	7	6	0	0	21	40	67	61	25	73	0	0	0	0	0	0	0	0	0	0	0	0	0	0	0	0	0	0	0	0	0	0	0	0	0	0	0	0	0	0	0	0
OTU3814	0	0	0	0	31	31	0	0	0	0	0	0	13	0	0	0	49	0	0	0	0	0	0	0	0	0	0	0	0	0	0	0	0	0	0	0	0	0	0	0	0	0	0	0	0	0	0	0	0
OTU3815	0	0	0	0	19	0	0	0	9	0	0	11	24	70	5	0	24	0	0	0	0	0	0	0	0	0	0	0	0	0	0	0	0	0	0	0	0	0	0	0	0	0	0	0	0	0	0	0	0
OTU3818	0	0	0	0	0	0	0	0	0	0	0	76	66	21	0	5	0	22	0	19	0	0	0	0	0	0	0	0	0	0	0	0	0	0	0	0	0	0	0	0	0	0	0	0	0	0	0	0	0
OTU3820	0	0	0	0	0	0	0	0	0	0	0	0	33	35	17	11	24	23	0	0	0	28	0	0	0	0	0	0	18	0	0	11	0	29	0	0	0	0	0	0	0	0	0	0	0	0	0	0	0
OTU383	0	0	0	0	0	0	0	0	0	0	0	0	0	0	0	0	0	0	0	0	0	0	0	0	0	0	0	0	0	0	0	0	0	66	0	59	0	122	0	0	0	0	22	75	72	0	27	20	27
OTU3830	0	0	0	0	0	26	24	0	0	0	0	0	0	0	0	0	0	0	0	0	0	0	0	0	0	0	0	0	0	0	0	75	0	0	0	0	0	34	0	26	38	0	0	0	0	0	0	32	27
OTU3832	0	0	0	0	18	19	0	0	0	0	0	0	0	0	0	0	0	0	0	0	0	0	0	0	0	0	0	0	0	0	0	0	0	0	0	0	0	0	0	0	0	0	0	0	0	0	0	0	0
OTU3833	5	0	0	0	0	0	0	30	0	0	0	0	0	0	0	0	0	0	0	0	0	0	0	0	0	0	0	0	0	0	0	0	0	0	0	0	0	0	0	0	0	0	0	0	0	0	0	0	0
OTU3834	0	0	0	0	8	20	0	0	0	0	0	21	12	15	29	0	37	0	0	0	0	0	0	7	0	0	0	0	0	0	0	0	0	0	0	0	0	0	0	0	0	0	0	0	0	0	0	0	0
OTU3836	16	0	0	11	0	0	0	20	5	0	0	0	0	0	0	0	0	0	0	0	0	0	0	0	0	0	0	0	0	0	0	0	0	0	0	0	0	0	0	0	0	0	0	0	0	0	0	0	0
OTU3846	0	0	0	0	118	0	0	0	0	0	0	0	0	0	34	107	0	0	0	0	0	0	0	0	0	0	0	0	0	0	0	0	0	0	0	0	0	0	0	0	0	0	0	0	0	0	0	0	0
OTU3847	20	0	15	0	0	0	0	0	29	20	0	0	5	0	0	0	0	0	0	0	0	0	0	0	0	0	0	0	0	0	0	0	0	0	0	0	0	0	0	0	0	0	0	0	0	0	0	0	0
OTU385	140	0	363	180	212	127	0	41	70	89	31	168	171	53	161	150	176	38	0	0	0	54	0	53	144	0	0	0	86	0	0	0	0	0	0	0	0	0	0	0	0	0	0	0	0	0	0	0	0
OTU3850	0	0	0	0	0	0	0	0	0	67	0	0	0	0	0	0	0	0	0	0	0	0	0	0	0	0	0	0	0	0	0	0	130	0	0	0	0	0	0	0	0	0	0	0	0	0	0	0	0
OTU3851	24	0	21	19	0	0	0	41	20	24	0	0	0	0	0	0	0	0	0	0	0	0	0	0	0	0	0	0	0	0	0	0	0	0	0	0	0	0	0	0	0	0	0	0	0	0	0	0	0
OTU3852	0	0	8	4	6	0	0	0	0	0	0	0	0	0	0	0	39	6	8	6	10	13	0	0	0	0	6	2	33	0	0	6	0	0	0	0	0	0	0	0	0	0	0	0	0	0	0	0	0
OTU3855	0	0	0	0	0	0	0	0	23	15	0	0	0	0	0	0	0	0	0	0	0	0	0	0	0	0	0	0	0	0	0	0	0	0	0	0	0	0	0	0	0	0	0	0	0	0	0	0	0
OTU3858	0	0	0	0	0	0	0	0	0	0	0	0	0	0	0	0	0	0	0	0	0	0	0	0	0	0	0	0	0	0	0	0	0	0	0	0	0	0	0	0	0	0	0	0	0	0	0	0	0
OTU3863	0	0	44	43	13	26	0	19	33	28	0	0	0	0	0	0	0	0	0	0	35	0	0	0	0	0	0	0	0	41	0	44	0	0	40	0	50	0	0	0	0	0	0	0	0	0	59	0	41
OTU3864	0	0	0	0	0	0	0	0	0	0	0	0	0	0	0	0	0	0	0	0	0	0	0	0	0	0	0	0	374	0	0	0	0	0	0	0	0	0	0	0	0	0	0	0	0	0	0	0	0
OTU3865	94	0	45	0	0	0	0	0	0	0	0	0	0	0	0	0	0	0	0	0	0	0	0	0	0	0	0	0	0	0	0	0	0	0	0	0	0	0	0	0	0	0	0	0	0	0	0	0	0
OTU3867	0	0	0	0	0	0	0	0	14	0	0	0	0	0	0	0	0	0	0	0	0	0	0	0	0	0	0	23	0	0	0	0	0	0	0	0	0	0	0	0	0	0	0	0	0	0	0	0	0
OTU3870	0	0	0	0	0	0	0	0	0	0	0	0	0	0	0	0	0	0	0	0	0	0	0	0	0	0	0	0	0	0	0	0	0	0	0	0	0	0	0	0	0	0	0	0	0	29	0	54	76
OTU3871	0	0	0	0	0	0	0	0	0	0	0	0	0	0	0	0	0	0	0	0	0	0	0	0	0	0	0	0	0	0	0	0	0	0	0	0	0	0	0	0	0	0	0	0	0	0	0	0	0
OTU3872	0	0	0	0	0	0	0	0	0	0	0	14	7	0	0	0	0	7	0	0	0	0	0	0	0	0	0	0	0	0	0	0	0	0	0	0	0	11	0	0	23	0	0	0	0	8	0	0	7
OTU3874	0	0	0	0	0	0	0	0	0	0	0	0	0	0	0	0	0	0	0	0	0	0	0	0	0	0	0	0	0	0	0	0	0	0	0	0	0	0	0	0	0	0	0	0	0	0	0	0	0
OTU3882	8	0	0	17	0	0	0	0	7	0	0	0	0	0	0	0	0	0	0	0	5	0	0	0	0	0	0	0	0	0	0	0	0	0	0	0	0	0	0	0	0	0	0	0	0	0	0	0	35
OTU3883	0	0	31	14	0	0	0	0	0	0	0	0	0	0	0	0	0	0	0	0	0	0	0	0	0	0	0	0	0	0	0	0	0	0	0	0	0	0	0	0	0	0	0	0	0	0	0	0	0
OTU3887	0	0	0	0	0	0	0	0	0	0	0	0	0	0	0	0	0	179	0	144	0	0	0	0	17	0	0	0	0	0	0	0	0	0	0	0	0	0	0	0	0	0	0	0	0	0	0	0	0
OTU3890	0	0	0	0	23	17	0	0	0	0	0	0	0	0	0	0	0	0	0	0	0	0	0	0	0	0	0	0	0	0	0	0	0	0	0	0	0	0	0	0	0	0	0	0	0	0	0	0	0
OTU3894	0	0	0	0	0	0	0	0	0	0	0	0	0	0	0	0	0	0	0	0	0	0	0	0	0	0	0	0	0	0	0	0	0	0	0	0	0	0	0	0	0	0	0	0	0	0	0	0	0
OTU39	0	0	0	0	13	0	0	0	0	0	0	0	8	12	53	0	0	16	0	109	0	26	0	0	28	0	0	0	18	0	0	64	0	299	34	271	28	0	0	16	14	0	0	0	0	15	28	7	27
OTU3902	0	5	0	0	0	17	0	0	0	0	0	0	0	0	42	40	0	0	0	0	0	0	0	0	0	0	0	0	0	0	0	0	0	0	0	0	0	0	0	0	0	0	0	0	0	0	0	0	0
OTU3909	17	0	43	36	29	0	0	32	0	32	0	0	0	0	0	0	0	0	0	0	0	0	0	0	0	0	0	0	0	0	0	0	0	0	0	0	0	0	0	0	0	0	0	0	0	0	0	0	0
OTU391	92	0	0	0	0	0	0	188	155	165	120	0	0	0	0	0	0	0	0	0	0	0	0	0	0	0	0	0	0	0	0	0	0	0	0	0	0	0	0	0	0	0	0	0	0	0	0	0	0
OTU3913	11	0	0	0	0	0	0	0	0	0	0	0	0	0	0	0	0	0	23	0	0	0	0	0	0	0	0	44	0	0	0	87	0	0	348	0	0	0	0	0	0	0	0	0	0	0	0	0	0
OTU3916	0	3	0	0	14	12	0	17	5	18	23	0	0	0	14	25	0	0	0	0	12	5	8	0	0	9	7	0	0	0	7	25	0	0	58	0	14	0	6	0	6	0	0	0	0	5	7	26	37
OTU3919	0	0	0	0	0	0	0	52	20	27	58	0	0	0	0	0	0	0	0	0	0	0	0	0	0	0	0	0	0	0	0	0	0	0	0	0	0	0	0	0	0	0	0	0	0	0	0	0	0
OTU392	0	0	6	17	0	0	0	0	0	0	0	0	0	0	0	0	0	0	0	0	0	0	7	0	0	10	0	8	10	0	0	26	0	0	15	0	17	0	27	30	0	0	21	87	32	0	11	11	0
OTU3924	0	0	6	4	0	0	0	0	7	0	7	0	0	0	0	0	0	0	0	0	0	0	0	0	0	0	0	0	0	0	0	0	0	0	0	0	0	0	0	0	0	0	0	0	0	0	0	0	0
OTU3927	0	0	0	15	0	5	0	0	0	0	0	16	13	31	0	0	16	4	0	6	0	12	0	0	0	0	0	6	7	0	16	6	0	14	27	10	32	0	17	10	0	0	0	0	0	0	0	10	0
OTU3928	0	0	0	0	0	0	0	0	0	0	0	0	0	0	0	11	0	0	78	0	24	0	18	0	0	48	8	56	0	0	0	0	0	23	0	0	0	0	0	0	0	0	0	0	0	0	0	0	0
OTU3930	0	0	0	0	0	0	0	0	0	0	0	0	0	0	0	0	0	0	0	0	0	0	0	0	0	0	0	0	0	0	0	0	0	0	0	0	0	0	0	0	0	0	0	0	0	0	0	0	0
OTU3933	0	0	0	0	0	0	0	0	0	0	0	0	0	0	0	0	0	0	0	0	0	0	0	0	0	0	0	0	0	0	0	0	0	0	0	0	0	0	0	0	0	0	0	0	0	0	0	0	0
OTU3936	0	524	0	0	0	7	0	0	0	0	0	3	0	0	2	0	0	0	0	0	0	0	0	0	0	0	0	0	0	0	0	0	0	0	0	0	0	0	0	0	0	0	0	0	0	0	0	0	0
OTU3937	7	0	13	20	0	0	10	0	6	0	0	0	0	0	0	0	0	0	13	0	14	0	5	0	0	8	0	9	0	0	0	21	0	17	35	19	16	0	10	10	24	0	22	0	0	0	0	0	0
OTU3938	0	0	0	0	0	0	0	0	0	0	0	42	38	30	33	0	0	0	0	29	0	0	0	0	20	0	0	0	0	0	0	0	0	0	0	0	0	0	0	0	0	0	0	0	0	0	0	0	0
OTU3939	0	0	0	0	18	0	0	0	0	0	0	28	46	28	0	0	25	0	0	0	0	10	0	0	0	0	0	0	0	0	0	13	0	23	0	41	0	54	0	0	0	0	0	0	0	0	0	43	18
OTU3947	0	0	0	0	0	0	0	0	0	0	0	8	7	6	0	16	0	0	0	0	0	11	0	0	0	0	0	0	0	0	0	0	0	18	0	0	0	9	0	0	0	0	0	0	0	0	0	0	0
OTU3948	0	0	0	0	0	0	0	0	0	0	0	0	0	0	0	0	0	0	0	0	0	0	0	0	0	0	0	0	0	0	0	0	0	0	0	0	0	0	0	0	0	0	0	0	0	0	0	0	0
OTU3949	0	0	0	0	0	0	0	0	0	0	0	50	57	0	0	0	0	0	0	0	0	0	0	0	0	0	0	0	0	0	0	0	0	0	0	0	0	0	0	0	0	0	0	0	0	0	0	0	0
OTU395	96	0	96	89	52	59	32	42	48	32	21	39	22	38	77	62	152	49	117	0	64	51	65	57	33	48	25	84	49	0	41	108	0	96	98	100	72	77	73	83	100	0	53	0	56	26	47	130	21
OTU3952	33	0	32	31	0	0	0	31	26	28	0	0	0	0	0	0	0	0	0	0	0	0	0	0	0	0	0	0	0	0	0	0	0	0	0	0	0	0	0	0	0	0	0	0	0	0	0	0	0
OTU3958	0	0	0	38	5	0	0	0	0	0	0	10	8	150	6	0	17	0	0	0	0	0	0	0	0	0	0	0	0	0	0	0	0	0	0	0	0	0	0	0	0	0	0	0	0	0	0	0	0
OTU3960	0	0	0	0	0	0	0	0	0	0	0	0	0	0	0	17	7	0	0	0	0	0	0	0	0	0	0	0	15	0	13	31	0	0	0	8	0	0	0	21	0	0	0	0	0	0	0	0	21
OTU3964	0	14	0	0	0	7	0	0	0	0	0	0	0	0	0	0	11	0	0	0	0	0	0	0	0	0	0	0	0	0	0	0	0	0	0	0	0	0	0	0	0	0	0	0	0	0	0	0	0
OTU3966	0	0	0	0	0	0	0	0	0	0	0	0	0	0	0	0	0	0	0	0	14	0	0	0	0	0	0	20	0	0	0	0	0	0	17	0	0	0	0	0	0	0	0	0	0	0	0	0	0
OTU3969	0	7	0	0	0	7	0	0	0	0	0	0	0	0	0	0	0	0	0	0	0	0	0	0	0	0	0	0	0	0	0	0	0	0	0	0	0	0	0	0	0	0	0	0	0	0	0	0	0
OTU3971	0	0	0	0	0	0	0	0	0	0	0	0	0	0	0	0	0	0	0	0	0	0	0	0	0	0	0	0	0	0	0	0	0	0	0	0	0	0	0	0	0	0	0	0	0	0	0	0	0
OTU3973	0	0	0	0	12	0	0	0	0	0	0	16	36	26	16	44	33	22	0	9	0	16	0	0	55	0	0	0	14	0	9	9	0	24	0	30	0	8	0	13	0	0	0	0	0	14	29	16	10
OTU3975	12	0	9	12	0	0	0	35	0	0	0	0	0	0	0	0	0	0	26	0	7	0	17	0	0	0	0	0	0	0	0	0	0	0	0	0	0	0	0	0	0	0	8	0	0	0	0	0	0
OTU3978	0	0	0	0	0	0	0	0	0	21	0	0	0	0	0	0	0	0	30	0	0	0	12	0	0	31	0	0	0	0	0	18	0	0	0	0	0	0	0	0	0	0	0	0	0	0	0	0	0
OTU3986	0	0	0	0	0	0	0	0	0	0	0	0	0	0	0	0	0	0	0	0	0	0	0	0	0	0	0	0	0	0	0	0	0	0	0	0	0	0	0	0	0	0	0	0	0	0	0	0	0
OTU3992	0	0	0	0	0	17	0	0	0	0	0	7	0	12	0	0	0	9	0	0	6	0	0	0	44	10	0	0	13	23	16	103	12	0	0	22	0	11	0	19	11	0	0	0	0	0	0	0	0
OTU3993	16	0	22	18	8	0	0	0	0	0	0	14	11	0	11	0	17	0	0	0	0	0	0	6	0	0	0	0	0	0	0	0	0	17	13	11	0	0	0	0	0	0	0	30	41	0	0	0	0
OTU3994	0	0	0	0	0	24	0	0	0	0	0	0	0	0	39	0	50	0	0	0	0	0	0	0	6	0	0	0	6	0	9	13	0	13	0	8	0	7	0	12	17	0	0	0	0	0	7	0	0
OTU3996	0	0	0	0	20	26	0	0	0	0	0	0	0	0	26	30	0	0	0	0	0	0	0	0	0	0	0	0	0	0	0	0	0	0	0	0	0	0	0	0	0	0	0	0	0	0	0	0	0
OTU3997	0	7	0	0	0	0	0	0	0	0	0	0	0	0	0	0	0	0	0	0	0	0	0	0	0	0	0	0	7	0	0	24	0	0	0	0	0	8	0	12	292	0	0	0	0	0	0	0	0
OTU4009	0	0	0	0	173	162	0	0	0	0	0	0	0	0	37	56	0	0	0	0	0	0	0	0	0	0	0	0	0	0	0	0	0	0	0	0	0	0	0	0	0	0	0	0	0	0	0	0	0
OTU4012	42	0	85	90	0	0	0	0	58	61	0	0	0	0	0	0	0	0	0	0	0	0	0	0	0	0	0	0	25	0	0	0	0	0	0	0	0	0	0	0	0	0	0	0	0	0	0	0	0
OTU4016	27	0	17	14	0	0	0	31	34	31	0	0	0	0	0	0	0	0	0	0	0	0	0	0	0	0	0	0	0	0	0	61	0	0	40	0	56	0	38	0	0	0	0	0	0	0	0	34	0
OTU4022	23	0	24	92	0	0	0	17	0	29	0	0	0	0	0	0	0	0	6	0	0	0	18	0	0	11	0	0	0	0	0	0	0	0	0	0	0	0	0	0	0	0	0	0	0	0	0	0	0
OTU4023	0	0	0	0	0	0	0	0	0	0	0	0	0	13	10	12	0	0	0	7	8	0	9	9	0	0	0	0	0	0	0	0	0	0	0	0	0	0	0	0	0	0	0	0	0	0	0	0	0
OTU4025	13	0	28	0	22	13	0	0	0	0	0	0	0	0	8	0	19	0	0	0	8	0	0	0	9	0	0	0	0	0	8	25	0	12	35	13	0	13	16	9	0	0	15	0	0	21	12	23	11
OTU4029	10	0	27	24	0	0	0	8	0	37	0	0	0	0	0	0	0	0	17	0	9	0	0	0	0	3	0	0	0	0	0	12	0	0	0	0	0	0	0	0	0	0	0	0	0	0	0	0	0
OTU403	0	0	0	0	53	0	84	0	0	0	0	58	45	654	30	57	49	100	0	171	5	170	0	49	20	0	0	0	30	0	35	491	0	83	0	304	0	145	0	85	33	0	0	0	0	0	0	0	0
OTU4033	0	0	0	0	14	0	0	0	0	0	0	0	0	0	0	0	0	0	0	0	0	0	0	15	19	0	0	0	0	0	0	20	0	18	0	22	0	0	0	0	0	0	0	0	0	0	0	45	30
OTU4037	0	0	0	0	0	0	0	0	0	0	0	22	17	21	35	0	0	21	0	0	0	25	0	15	0	0	0	0	0	0	0	0	0	0	0	11	0	0	0	0	0	0	0	0	0	0	0	0	0
OTU4040	0	0	0	0	0	0	0	0	0	0	0	0	0	0	0	0	0	0	0	0	0	0	0	0	0	0	0	0	0	0	0	0	0	0	0	0	0	0	0	0	0	0	0	0	0	0	0	0	0
OTU4045	40	0	85	0	0	9	0	0	0	0	0	0	0	0	0	0	0	0	0	0	0	0	0	0	0	0	0	0	0	0	0	0	0	0	0	0	0	0	0	0	0	0	0	0	0	0	0	0	0
OTU4049	27	0	35	12	0	0	0	0	0	19	3	0	0	0	0	0	0	0	15	0	12	0	9	0	0	14	0	0	0	0	0	0	20	0	0	0	0	0	0	0	0	0	0	0	22	0	0	0	0
OTU4050	0	11	0	0	0	0	0	0	0	0	0	0	0	0	28	18	38	0	0	0	0	0	0	0	0	0	0	0	0	0	0	0	0	24	0	0	0	19	0	29	22	0	0	0	0	0	0	0	0
OTU4055	0	0	0	0	0	0	0	0	0	0	0	0	0	35	0	0	0	0	0	0	0	0	0	0	0	0	0	0	0	0	0	0	0	0	0	0	0	0	0	0	0	0	0	0	0	0	0	0	0
OTU4056	23	0	0	0	0	0	0	74	27	0	10	0	0	0	0	0	351	0	0	0	0	0	0	0	0	0	0	0	0	0	0	0	0	0	0	0	0	0	0	0	0	0	0	0	0	0	0	0	0
OTU406	112	0	201	196	53	39	100	24	123	118	34	0	0	0	0	0	0	0	107	0	111	0	59	0	0	170	26	83	46	0	30	47	0	0	68	0	44	22	37	0	29	0	37	0	0	0	17	24	0
OTU4062	0	0	4	5	0	0	0	0	0	0	8	0	0	0	0	0	0	0	0	0	0	0	0	0	0	0	0	0	0	0	0	0	0	0	0	0	0	0	0	0	0	0	0	0	0	0	0	0	0
OTU4065	0	0	0	0	29	0	0	0	0	0	0	0	0	0	0	9	5	0	0	0	0	36	0	0	0	0	0	0	0	0	0	0	0	0	0	0	0	0	0	0	0	0	0	0	0	0	0	0	0
OTU4071	0	0	0	0	0	0	0	0	0	0	0	0	0	0	0	0	0	0	39	0	25	13	0	0	0	0	0	0	0	0	0	0	0	10	0	18	0	23	0	0	0	0	0	0	0	0	0	0	0
OTU4072	0	0	0	25	0	0	0	0	0	0	0	23	10	0	0	0	0	0	0	0	0	0	0	0	20	0	0	0	0	0	0	0	0	0	0	0	0	0	0	0	0	0	0	0	0	0	0	0	0
OTU4073	43	0	30	30	24	0	0	0	0	0	0	0	0	0	0	0	0	0	0	0	0	0	0	0	0	0	0	0	0	0	0	0	0	0	0	0	0	0	0	0	0	0	0	0	0	0	0	0	0
OTU4074	0	0	0	0	0	0	0	0	0	0	0	39	45	160	94	0	0	0	0	0	0	0	0	0	0	0	0	0	0	0	0	0	0	0	0	0	0	0	0	0	0	0	0	0	0	0	0	0	0
OTU4075	0	0	29	0	0	0	0	0	0	30	0	0	0	0	0	0	0	0	0	0	0	0	0	0	0	0	0	0	0	0	0	0	0	0	0	0	0	0	0	0	0	0	0	0	0	0	0	0	0
OTU4077	0	0	0	0	0	0	0	0	0	0	0	0	0	0	0	0	0	0	0	0	0	0	0	0	0	0	0	0	0	0	0	0	0	0	0	0	0	0	0	0	0	0	0	0	0	0	0	0	0
OTU4078	17	0	16	18	0	2	0	0	0	0	0	0	0	0	2	4	21	0	0	0	0	0	0	0	0	0	0	0	0	0	0	0	0	0	0	0	0	0	0	0	0	0	0	0	0	0	0	0	0
OTU4086	0	0	0	0	0	0	0	0	0	0	0	0	0	0	0	0	0	0	0	0	0	0	0	0	0	0	0	0	0	0	0	15	0	0	0	0	0	19	0	0	0	0	0	0	0	0	0	0	0
OTU409	0	0	0	0	26	0	0	0	0	0	0	26	58	36	0	0	0	30	0	32	19	93	10	0	0	4	0	21	25	6	0	55	5	40	20	32	23	42	0	9	0	0	0	26	0	0	22	100	0
OTU4091	0	0	0	0	10	0	0	19	0	20	0	9	13	0	0	0	42	9	0	0	0	15	0	0	0	0	0	0	0	0	0	0	0	0	0	0	0	0	0	0	0	0	0	0	0	0	0	0	0
OTU4093	0	0	53	43	33	27	0	0	0	0	0	22	0	42	0	0	0	0	0	0	0	0	0	0	0	0	0	0	0	0	0	0	0	0	0	0	0	0	0	0	0	0	0	0	0	0	0	0	0
OTU4098	0	0	0	0	19	9	0	0	0	0	0	20	10	47	38	22	0	0	0	0	0	0	0	0	0	0	0	0	0	0	0	16	0	6	0	7	0	0	0	16	0	0	0	0	0	8	5	12	0
OTU4099	0	0	0	0	0	0	0	0	0	0	0	0	0	0	33	0	0	0	4	0	0	0	0	0	0	0	0	0	12	0	0	0	0	0	0	0	0	0	0	0	0	0	0	0	0	0	0	0	0
OTU410	55	0	49	56	16	8	0	55	56	26	14	0	0	0	0	0	0	0	65	0	105	0	48	0	0	54	0	36	37	0	14	77	0	24	130	23	55	28	0	17	25	0	43	0	55	0	21	57	12
OTU4101	0	0	0	0	0	0	0	0	0	0	0	0	0	0	0	0	0	0	0	0	19	0	0	0	0	34	0	39	0	0	0	0	0	0	0	0	0	0	0	0	0	0	0	0	0	0	0	0	0
OTU4105	29	0	0	0	16	48	0	15	0	0	0	0	0	0	0	0	0	0	0	0	0	0	0	0	0	0	0	0	0	0	0	0	0	0	0	0	0	0	0	0	0	0	0	0	0	0	0	0	0
OTU4107	0	0	0	0	0	0	0	0	0	0	0	23	32	9	0	15	13	12	0	0	0	0	0	26	20	0	0	0	0	0	0	0	0	15	0	18	0	0	0	0	0	0	0	0	0	0	0	0	0
OTU4108	0	0	34	0	0	0	0	0	0	0	0	0	0	0	0	0	0	0	0	0	0	0	0	0	0	0	0	0	0	0	0	0	0	0	0	0	0	0	0	0	0	0	0	0	0	0	0	0	0
OTU4114	0	0	0	0	42	0	0	0	0	0	0	0	0	0	0	0	0	0	0	0	0	0	0	0	0	0	0	0	19	0	9	0	0	0	0	38	0	0	0	15	0	0	0	0	0	0	0	19	0
OTU4116	0	0	0	0	0	18	0	0	0	0	0	0	0	0	19	0	25	0	0	0	0	0	0	20	24	0	0	0	0	0	19	32	0	27	0	0	0	17	0	22	0	0	0	0	0	0	0	47	31
OTU4127	0	0	52	55	0	0	0	0	0	0	0	39	30	38	60	92	0	0	0	0	0	0	0	0	0	0	0	0	19	0	0	0	0	0	0	0	0	0	0	0	0	0	0	0	0	0	0	0	0
OTU4129	0	0	0	0	0	27	0	0	0	0	0	27	0	18	32	28	0	23	0	17	0	0	0	23	0	0	0	0	12	0	0	0	0	42	0	28	0	12	0	0	47	0	0	0	0	0	0	0	0
OTU413	219	0	288	242	0	0	0	101	20	61	4	0	0	0	0	0	0	0	112	0	122	0	52	0	0	56	15	134	0	0	11	69	0	0	361	0	249	0	226	0	0	31	80	5	0	0	0	0	0
OTU4130	0	0	0	0	0	0	10	0	0	0	0	0	0	0	0	0	0	0	0	0	0	0	0	0	0	0	0	0	0	0	0	91	0	0	9	0	13	0	0	0	0	0	18	0	0	0	0	0	0
OTU4131	0	0	0	0	0	0	0	0	0	6	0	0	19	0	13	0	0	0	0	0	0	0	0	0	0	0	0	0	0	0	0	16	0	0	0	0	0	0	0	0	0	0	0	0	0	0	0	0	0
OTU4135	0	0	42	82	0	0	0	0	0	0	0	0	0	0	0	0	0	0	0	0	0	0	0	0	0	0	0	0	0	0	0	0	0	0	0	0	0	0	0	0	0	0	0	0	0	0	0	0	0
OTU4137	0	0	0	0	0	0	0	0	0	0	0	0	0	0	0	0	36	0	0	0	0	0	0	0	0	0	0	0	63	0	0	0	0	0	0	0	0	0	0	0	0	0	0	0	0	0	0	0	0
OTU4145	0	0	19	0	0	0	0	27	14	0	0	0	0	0	0	0	0	0	0	0	0	0	0	0	0	0	0	0	0	0	0	0	0	0	0	0	0	0	0	0	0	0	0	0	0	0	0	0	0
OTU4149	0	9	0	0	54	0	0	0	0	0	0	0	0	0	150	34	22	0	0	0	0	0	0	0	0	0	0	0	0	0	0	0	0	0	0	0	0	0	0	0	0	0	0	0	0	0	0	0	0
OTU4155	0	0	0	0	0	0	0	0	0	0	0	0	0	0	0	0	0	0	0	0	0	0	0	0	0	0	0	0	67	40	0	18	60	0	0	0	0	0	0	0	0	112	0	0	0	0	0	0	0
OTU4161	20	0	4	23	0	0	0	36	51	20	0	0	0	0	0	0	0	0	15	0	0	0	55	0	0	15	40	11	42	0	0	0	31	0	0	0	0	0	24	0	0	39	48	0	20	0	0	0	0
OTU4163	0	0	0	0	55	17	0	0	0	0	0	0	0	0	0	0	0	0	0	0	0	0	0	0	0	0	0	0	0	0	0	0	0	0	0	0	0	0	0	0	0	0	0	0	0	0	0	0	0
OTU4165	0	0	99	80	0	0	0	0	11	0	0	0	0	0	0	0	0	0	0	0	0	0	0	0	0	0	0	0	0	0	0	0	0	0	0	0	0	0	0	0	0	0	0	0	0	0	0	0	0
OTU4167	0	0	0	0	0	0	0	0	0	0	0	0	0	0	0	0	0	0	0	0	0	0	0	0	0	0	0	0	0	0	0	0	0	0	0	0	0	0	0	0	0	0	0	0	0	0	0	0	104
OTU4169	0	0	0	0	29	10	12	0	0	0	0	13	0	0	12	0	0	6	0	14	0	9	0	16	0	0	0	0	10	0	20	30	0	22	0	18	0	0	0	0	0	0	0	0	0	0	0	0	0
OTU4170	0	13	0	0	0	13	0	0	0	0	0	0	0	0	0	0	0	0	0	0	0	0	0	0	0	0	0	0	18	0	0	0	0	0	0	0	0	0	0	0	0	0	0	0	0	0	0	0	0
OTU4173	19	0	11	33	32	14	0	0	0	0	0	0	0	0	0	0	0	0	0	0	0	0	0	0	0	0	0	0	0	0	0	0	0	0	0	0	0	0	0	0	0	0	0	0	0	0	0	0	0
OTU4175	0	0	0	0	13	28	0	0	0	0	0	0	0	0	0	0	0	0	0	0	0	0	0	0	0	0	0	0	0	0	0	0	0	0	0	0	0	0	0	0	0	0	0	0	0	0	0	0	0
OTU4176	0	0	0	0	0	0	0	0	0	0	0	0	0	0	0	0	0	38	0	51	0	36	0	15	0	0	0	0	0	0	0	0	0	33	0	0	0	0	0	0	0	0	0	0	0	0	0	0	0
OTU4181	0	0	0	0	0	0	0	0	0	0	0	0	35	0	24	0	27	0	16	0	0	0	0	0	29	0	0	0	0	0	0	0	0	0	0	12	0	0	0	19	0	0	0	0	0	0	0	0	0
OTU4185	34	0	0	0	0	0	0	0	36	0	0	0	0	0	0	0	0	0	0	0	0	0	0	0	0	0	0	0	0	0	0	0	0	0	0	0	0	0	0	0	0	0	0	0	0	0	0	0	0
OTU4188	0	0	0	0	0	0	0	0	0	0	0	0	0	13	0	33	0	34	0	0	0	112	0	0	24	0	0	0	0	0	0	0	0	0	0	0	0	30	0	0	0	0	0	0	0	0	25	0	0
OTU419	15	5	24	23	11	7	0	0	0	9	0	24	20	6	12	7	28	14	0	0	0	8	0	18	0	0	0	0	11	0	0	8	0	0	0	0	0	0	0	0	0	0	0	0	0	0	0	0	0
OTU4192	0	0	0	0	0	0	0	0	15	0	0	0	0	0	0	0	0	0	27	0	36	0	18	0	0	14	0	0	0	0	0	0	0	0	0	0	0	0	0	0	0	0	0	0	0	0	0	0	0
OTU4195	0	0	0	0	0	0	0	0	0	0	0	0	0	0	0	0	0	0	0	0	0	0	0	0	0	0	0	0	0	0	0	0	0	0	0	0	0	0	0	0	0	0	0	0	0	0	0	0	0
OTU420	0	16	0	0	31	0	0	0	0	0	0	14	20	9	19	19	16	0	0	0	0	7	0	0	0	0	0	0	12	0	12	9	0	0	0	0	0	0	0	0	0	0	0	0	0	0	0	0	0
OTU4199	26	0	29	21	0	0	0	0	0	0	23	0	0	0	0	0	0	0	11	0	0	0	23	0	0	0	0	0	0	0	22	0	0	0	0	0	0	0	0	0	0	0	0	0	0	0	0	0	0
OTU4202	21	0	43	68	0	0	0	0	0	0	0	0	0	0	0	0	0	0	0	0	0	0	0	0	0	0	0	0	0	0	0	26	0	0	0	0	0	0	0	0	0	0	0	0	0	0	0	0	0
OTU4205	0	0	0	0	0	0	0	0	0	0	0	0	0	0	0	0	0	0	0	0	0	0	0	0	0	0	0	0	0	0	0	0	0	0	0	0	0	0	0	0	0	0	0	0	0	0	0	0	0
OTU4207	0	0	0	0	11	24	0	0	0	0	0	30	27	18	23	11	25	0	0	0	0	0	0	0	0	0	0	0	0	0	0	0	0	0	0	0	0	0	0	0	0	0	0	0	0	0	0	0	0
OTU421	112	0	80	67	0	0	0	101	182	80	217	0	0	0	0	0	0	0	109	0	71	0	73	0	0	125	266	118	275	53	0	70	103	0	104	0	72	0	97	0	0	85	163	32	34	8	0	0	0
OTU4212	0	0	0	0	0	0	0	0	0	6	0	0	0	0	0	0	0	0	0	0	6	0	0	0	0	0	0	0	0	0	0	0	0	0	0	0	0	0	0	0	0	0	0	0	0	0	0	0	0
OTU4213	0	0	0	0	0	0	0	0	0	0	0	15	0	25	0	0	0	30	0	33	0	39	0	0	0	0	0	0	0	0	0	0	0	0	0	0	0	0	0	0	0	0	0	0	0	0	0	0	0
OTU4214	50	0	0	0	0	0	0	0	0	0	0	0	0	0	0	0	0	0	0	0	0	0	0	0	0	0	0	0	0	0	0	0	0	0	63	0	0	0	0	0	0	0	0	200	0	0	0	0	0
OTU4215	0	8	0	0	5	0	0	0	0	0	0	37	31	13	0	0	0	6	0	3	0	5	0	0	0	0	0	0	13	0	0	0	0	0	0	0	0	0	0	0	0	0	0	0	0	0	0	0	0
OTU4217	13	0	15	0	0	0	0	0	0	0	0	0	0	0	0	0	0	0	32	0	26	0	15	0	0	0	14	23	0	0	0	0	0	0	21	0	0	0	24	0	0	0	59	0	0	0	0	0	0
OTU4218	0	0	0	0	11	0	0	0	0	0	0	0	0	118	0	0	0	0	0	12	0	0	0	15	0	0	0	0	0	0	0	0	0	41	0	82	0	55	0	0	0	0	0	0	0	69	0	22	0
OTU422	51	0	15	0	0	0	0	0	110	169	0	0	0	0	0	0	0	0	0	0	0	0	23	0	0	0	409	54	0	54	0	30	174	0	0	0	0	0	0	0	0	0	0	0	0	0	0	0	0
OTU4222	86	0	115	0	0	0	0	56	0	0	0	0	0	0	0	0	0	0	0	0	0	0	0	0	0	0	0	0	0	0	0	0	0	0	0	0	0	0	0	0	0	0	0	0	0	0	0	0	0
OTU4230	23	0	28	13	0	0	0	16	15	18	0	0	0	0	0	0	0	0	0	0	0	0	0	0	0	0	0	0	0	0	0	0	0	0	0	0	0	0	0	0	0	0	0	0	0	0	0	0	0
OTU4236	0	0	0	0	0	0	0	0	0	0	0	0	0	0	0	0	0	41	0	52	0	28	0	17	40	0	0	0	0	0	0	0	0	0	0	0	0	0	0	0	0	0	0	0	0	0	0	0	0
OTU4237	22	0	9	0	0	0	0	0	0	0	0	0	0	0	0	0	0	0	0	0	0	0	0	0	0	0	0	0	0	0	0	0	0	0	0	0	0	0	0	0	0	0	0	0	0	0	0	0	0
OTU4248	26	0	32	21	0	0	0	0	0	0	0	0	0	0	0	0	0	0	0	0	0	0	0	0	0	0	0	0	0	0	12	0	0	0	103	0	56	17	0	0	0	0	0	0	0	0	0	0	0
OTU4249	0	0	0	0	12	6	0	0	0	0	0	0	0	0	0	0	0	0	0	0	0	0	0	0	0	0	0	0	0	0	0	0	0	0	0	0	0	0	0	0	0	0	0	0	0	0	0	0	0
OTU4254	0	0	0	0	0	0	0	0	0	0	0	30	25	37	3	0	0	18	0	8	0	0	0	15	0	0	0	0	95	0	0	0	0	0	0	0	0	0	0	0	0	0	0	0	0	0	0	0	0
OTU4255	0	0	0	0	6	0	0	0	12	3	0	0	0	0	0	0	0	0	17	0	5	0	0	0	0	7	0	9	0	0	0	0	0	0	38	0	37	0	7	0	0	0	6	0	0	0	0	0	0
OTU4256	0	0	0	0	15	31	0	0	0	0	0	34	0	36	46	0	0	29	0	33	0	0	0	30	0	0	0	0	0	0	0	0	0	40	0	0	0	39	0	52	0	0	0	0	0	0	0	0	0
OTU4259	0	0	0	9	19	0	0	0	0	7	0	10	0	5	8	0	4	0	0	0	0	0	0	0	0	0	0	0	0	0	0	0	0	0	0	0	0	0	0	0	0	0	0	0	0	0	0	0	0
OTU4261	45	0	0	34	19	0	0	0	0	0	0	0	0	0	0	0	0	0	0	0	0	0	0	0	0	0	0	0	0	0	0	0	0	0	0	0	0	0	0	0	0	0	0	0	0	0	0	0	0
OTU4270	0	15	0	0	21	29	0	0	0	0	0	23	40	64	52	29	48	0	0	0	0	0	0	0	0	0	0	0	0	0	0	0	0	0	0	0	0	0	0	0	0	0	0	0	0	0	0	0	0
OTU4271	0	0	0	0	0	0	0	0	0	0	0	28	26	13	38	42	0	24	0	19	0	0	0	26	21	0	0	0	0	0	0	0	0	0	0	0	0	0	0	0	0	0	0	0	0	0	0	0	0
OTU4272	37	0	37	32	0	0	0	0	0	17	0	0	10	0	0	0	0	0	0	0	0	0	0	0	0	0	0	0	0	0	0	0	0	0	0	0	0	0	0	0	0	0	0	0	0	0	0	0	0
OTU4274	0	0	0	0	0	0	0	0	0	0	0	19	10	16	12	22	0	0	0	0	0	10	0	0	0	0	0	0	0	0	0	0	0	12	0	8	0	0	0	17	19	0	0	0	0	12	10	11	0
OTU4275	0	0	0	31	0	0	0	8	7	5	0	0	0	0	0	0	0	0	26	0	24	0	37	0	0	0	0	0	0	0	0	0	0	0	0	0	0	0	0	0	0	0	0	0	0	0	0	0	0
OTU428	65	0	119	97	0	0	45	60	54	72	0	0	0	0	0	0	0	0	63	0	56	0	38	0	0	42	47	59	0	29	0	68	36	0	38	0	38	0	50	0	0	0	40	0	0	0	15	0	37
OTU4280	0	0	0	0	0	0	0	0	0	0	0	0	0	0	0	0	0	0	0	0	0	0	0	0	0	0	0	0	0	0	0	0	0	0	0	0	0	0	0	0	0	0	0	0	0	0	0	0	0
OTU4282	0	0	21	32	0	0	0	0	0	0	0	0	0	0	0	0	0	0	0	0	0	0	0	0	0	0	0	0	0	0	0	13	0	0	0	0	0	0	0	0	0	0	0	0	0	0	0	0	0
OTU4292	0	18	0	0	11	0	0	0	0	0	0	6	0	7	0	0	34	28	0	26	0	24	0	5	0	0	0	0	27	0	0	0	0	0	0	0	0	0	0	0	0	0	0	0	0	0	0	0	0
OTU4300	0	0	0	0	21	18	20	0	0	0	0	0	0	0	0	16	22	0	0	0	0	0	0	0	0	0	0	0	0	0	21	0	0	38	0	32	0	0	0	0	0	0	0	0	0	0	0	39	0
OTU4301	27	0	14	0	18	19	0	0	0	0	0	0	0	0	12	0	0	0	0	0	0	0	0	0	0	0	0	0	0	0	0	0	0	0	0	0	0	0	0	0	0	0	0	0	0	0	0	0	0
OTU4303	0	0	23	34	0	0	0	6	17	0	0	0	0	0	0	0	0	0	0	0	21	0	0	0	0	20	0	14	21	0	0	25	0	0	0	0	0	0	0	0	0	0	0	0	0	0	0	26	0
OTU4304	0	0	0	0	0	0	0	0	0	0	0	0	0	0	0	0	0	0	0	0	0	0	0	0	0	0	0	0	0	0	0	0	0	0	0	0	0	0	0	0	0	0	0	0	0	0	0	0	0
OTU4306	31	0	56	0	0	0	0	0	0	0	0	0	0	0	0	0	0	0	0	0	0	0	43	0	0	0	0	0	0	0	0	0	0	0	0	0	0	0	0	0	0	0	0	0	0	0	0	0	0
OTU4309	0	0	0	0	0	0	0	0	0	0	0	0	0	0	0	0	0	0	0	0	0	0	0	0	0	0	0	0	18	0	0	17	0	0	0	0	18	0	0	0	0	0	0	0	0	0	0	0	0
OTU432	20	14	18	10	0	0	0	30	29	24	0	0	0	0	0	0	0	0	34	0	30	35	19	0	0	30	22	22	42	0	19	56	8	0	0	0	0	30	13	0	17	0	22	327	106	0	0	0	23
OTU4324	17	0	0	13	0	0	0	0	0	15	0	0	0	0	0	0	0	0	0	0	0	339	5	0	0	0	0	0	0	0	0	0	0	3	0	13	0	6	0	4	0	0	0	0	0	0	0	0	4
OTU4325	0	0	0	0	0	0	0	0	0	0	0	50	82	157	0	0	65	0	0	0	0	0	0	0	0	0	0	0	0	0	0	0	0	0	0	0	0	0	0	0	0	0	0	0	0	0	0	0	0
OTU4328	0	0	0	0	0	0	0	0	0	0	0	7	0	5	20	0	14	4	0	36	0	14	0	12	20	0	0	0	0	0	0	8	0	0	0	0	0	0	0	0	6	0	0	0	0	0	0	0	0
OTU4330	0	0	0	0	0	0	0	0	0	0	0	0	0	0	0	0	0	0	0	0	0	0	0	0	0	0	0	0	0	0	0	0	0	0	0	0	0	0	0	0	0	0	0	0	0	0	0	0	0
OTU4331	0	0	0	0	20	0	0	0	0	0	0	21	23	0	10	0	0	38	0	23	0	0	0	21	16	0	0	0	39	0	0	0	0	0	0	0	0	0	0	0	0	0	0	0	0	0	0	0	0
OTU4332	0	0	0	0	37	26	0	0	0	0	0	34	30	39	26	20	36	0	0	0	0	0	0	0	0	0	0	0	0	0	0	0	0	0	0	0	0	0	0	0	0	0	0	0	0	0	0	0	0
OTU4333	0	0	0	0	0	0	0	0	0	21	0	0	0	0	0	0	0	0	0	0	0	0	0	0	0	0	0	0	0	0	0	22	0	0	0	0	0	0	0	0	0	0	0	0	0	0	0	0	0
OTU434	16	228	82	130	46	14	10	14	26	13	28	57	147	135	93	45	79	7	119	50	78	7	34	35	77	31	30	24	60	85	21	51	12	13	20	10	10	13	14	16	3	11	27	0	0	18	25	49	0
OTU4341	0	9	0	0	24	0	0	0	0	0	0	0	32	17	0	0	20	0	0	0	0	0	0	0	0	0	0	0	0	0	0	9	0	0	0	30	0	29	0	0	0	0	0	0	0	0	0	13	0
OTU4343	0	0	0	0	9	7	0	5	0	0	0	0	0	0	0	0	10	0	0	0	0	0	0	0	0	0	0	0	10	0	0	0	0	0	0	0	0	0	0	0	0	0	0	0	0	0	0	0	0
OTU4345	0	0	0	0	0	0	0	0	0	0	0	0	0	0	0	0	0	0	38	0	34	0	17	0	0	0	0	0	0	17	0	18	0	0	19	0	12	0	0	0	0	0	20	0	0	0	0	0	0
OTU4346	0	0	0	0	0	0	0	0	0	0	0	0	0	0	0	0	0	0	0	0	0	0	0	0	0	0	0	0	0	0	0	0	0	0	0	0	0	0	0	0	0	0	0	0	0	0	0	0	0
OTU435	0	0	116	61	0	12	0	94	59	0	160	0	0	0	0	0	0	0	0	0	0	0	0	0	0	0	0	0	0	0	0	0	0	0	0	0	0	0	0	0	0	0	0	0	0	0	0	0	0
OTU4349	8	3	9	0	14	0	0	15	0	0	0	0	0	0	0	0	0	0	0	0	0	0	0	0	0	0	0	0	0	0	0	0	0	0	0	0	0	0	0	0	0	0	0	0	0	0	0	0	0
OTU4355	0	0	0	0	0	0	0	0	0	0	0	0	0	20	16	16	0	14	0	0	0	0	0	11	0	0	0	0	0	0	0	19	0	27	0	28	0	20	0	23	31	0	0	0	0	0	0	23	21
OTU4356	0	0	0	58	0	0	0	16	29	0	0	0	0	0	0	0	0	0	0	0	0	0	0	0	0	0	0	0	0	0	0	0	0	0	0	0	0	0	0	0	0	0	0	0	0	0	0	0	0
OTU4358	0	0	0	0	0	18	0	16	0	0	0	0	0	0	0	0	0	0	0	0	0	0	0	0	0	0	0	0	0	0	0	0	0	0	0	0	0	0	0	0	0	0	0	0	0	0	0	0	0
OTU4360	49	0	54	47	0	0	0	0	0	0	0	0	0	0	0	0	0	0	0	0	0	0	0	0	0	0	0	0	0	0	0	0	0	45	0	56	0	0	0	0	0	0	0	0	0	0	0	0	0
OTU4361	2	0	0	3	0	0	0	0	0	3	0	0	0	0	0	0	0	0	0	0	0	0	6	0	0	4	7	0	3	0	0	0	0	0	0	0	0	0	0	0	0	0	0	0	0	0	0	0	0
OTU4364	0	0	38	28	0	0	0	0	20	17	0	0	0	0	0	0	0	0	0	0	0	0	0	0	0	0	0	0	0	0	0	0	0	0	0	0	0	0	0	0	0	0	0	0	0	0	0	0	0
OTU437	0	0	36	305	0	0	0	15	12	0	0	0	0	0	0	0	0	0	0	0	61	0	0	0	0	0	0	0	0	12	0	0	10	0	0	0	0	0	0	0	0	0	0	0	0	0	0	0	0
OTU4371	0	0	0	0	0	36	0	0	0	0	0	41	0	0	26	0	0	0	0	0	0	13	0	0	17	0	0	0	0	0	28	0	0	0	0	0	0	21	0	23	0	0	15	0	0	0	0	0	0
OTU4372	55	0	29	58	0	0	0	45	55	0	42	0	0	0	0	0	0	0	0	0	0	0	0	0	0	0	0	0	0	0	0	0	0	0	0	0	0	0	0	0	0	0	0	0	0	0	0	0	0
OTU4373	0	0	0	0	0	0	0	0	0	0	0	21	0	0	0	0	0	52	0	33	0	0	0	0	0	0	0	0	0	0	0	0	0	0	0	0	0	0	0	0	0	0	0	0	0	0	0	0	0
OTU4374	0	0	0	0	61	26	0	0	0	0	0	49	75	55	10	0	0	0	0	0	0	0	0	0	0	0	0	0	0	0	0	0	0	0	0	0	0	0	0	0	0	0	0	0	0	0	0	0	0
OTU4378	0	0	0	0	29	18	0	0	0	0	0	0	0	0	0	115	0	0	0	19	0	0	0	0	0	0	0	0	28	0	0	0	0	0	0	0	0	0	0	0	0	0	0	0	0	0	0	0	0
OTU4381	24	0	27	50	0	0	0	21	20	0	0	0	0	0	0	0	0	0	0	0	0	0	0	0	0	0	0	0	0	0	0	0	0	0	0	0	0	0	0	0	0	0	0	0	0	0	0	0	0
OTU4391	0	0	0	0	0	0	0	8	7	0	0	0	0	0	0	0	0	0	4	0	0	0	0	0	0	0	6	4	0	7	0	7	0	6	0	0	0	0	7	0	3	0	0	44	23	0	7	0	0
OTU440	67	5	99	215	15	39	0	46	86	56	56	0	0	0	0	6	37	0	0	7	0	0	0	0	0	0	0	0	0	0	0	0	0	0	0	0	0	0	0	0	0	0	0	0	0	0	0	0	0
OTU4408	24	0	27	30	42	42	0	18	0	0	18	0	0	0	0	0	0	0	0	0	0	0	0	0	0	0	0	0	0	0	0	0	0	0	0	0	0	0	0	0	0	0	0	0	0	0	0	0	0
OTU4409	37	0	85	84	0	0	0	6	24	11	0	0	0	0	0	0	0	0	0	0	0	0	0	0	0	0	0	0	0	0	0	0	0	0	0	0	0	0	0	0	0	0	0	0	0	0	0	0	0
OTU4411	0	0	0	0	19	0	0	0	0	0	0	0	0	0	14	23	10	0	0	9	0	3	0	0	9	0	0	0	20	0	0	33	0	22	0	17	0	0	0	0	0	0	0	0	0	0	0	12	18
OTU4421	16	0	16	12	0	0	0	15	13	16	0	0	0	0	0	0	0	0	0	0	0	0	0	0	0	0	0	0	0	0	0	0	0	0	0	0	0	0	0	0	0	0	0	0	0	0	0	0	0
OTU4423	0	0	0	0	13	9	16	0	0	0	0	0	0	0	0	0	0	0	0	0	0	0	0	10	0	0	0	0	15	0	0	0	0	31	0	27	0	0	0	22	0	0	0	0	0	8	0	12	0
OTU4424	0	0	0	18	18	0	0	0	0	0	0	14	0	18	0	0	18	0	0	0	0	0	0	0	0	0	0	0	0	0	0	0	0	0	0	0	0	0	0	0	0	0	0	0	0	0	0	0	0
OTU4425	11	0	0	0	0	0	0	0	0	0	0	0	0	0	0	0	0	0	0	0	0	0	0	0	0	0	0	0	0	0	0	0	0	0	0	0	0	0	0	0	0	0	0	0	0	0	0	0	0
OTU443	17	0	17	12	0	0	0	0	0	0	0	10	0	0	0	0	0	0	12	0	9	0	24	0	0	10	5	13	0	0	0	17	0	0	0	0	4	10	0	0	0	0	20	0	0	0	0	0	0
OTU4430	40	0	36	0	0	0	15	0	0	0	0	0	0	0	0	0	0	0	0	0	0	0	0	0	0	0	0	0	0	0	0	0	0	0	62	35	49	0	52	0	16	0	35	0	0	0	0	0	0
OTU4431	24	0	31	9	0	0	0	0	0	0	0	0	0	0	0	0	0	7	15	0	20	0	0	0	0	3	0	0	13	0	0	12	0	23	21	5	16	17	7	8	8	0	7	0	0	5	13	8	4
OTU4432	0	0	0	0	0	0	0	0	0	0	0	13	13	81	0	0	0	0	0	0	0	0	0	0	0	0	0	0	0	0	0	0	0	0	0	0	0	0	0	0	0	0	0	0	0	0	0	0	0
OTU4434	0	0	0	0	27	7	0	0	0	0	0	0	0	0	0	0	0	0	0	0	0	0	0	0	0	0	0	0	0	0	0	0	0	0	0	0	0	0	0	0	0	0	0	0	0	0	0	0	0
OTU4436	21	0	36	15	20	22	0	13	7	5	0	13	29	0	0	14	36	0	0	0	0	0	0	0	0	0	0	0	0	0	0	0	0	0	0	0	0	0	0	0	0	0	0	0	0	0	0	0	0
OTU444	197	0	76	425	0	0	0	75	146	41	0	0	0	0	0	0	0	0	87	3	61	0	230	0	0	92	189	98	3	28	0	30	53	0	102	2	65	0	71	0	0	0	82	0	0	0	0	0	0
OTU4443	0	0	0	0	0	0	0	0	0	0	0	0	0	0	0	0	0	0	0	0	0	0	0	0	0	0	0	0	0	0	31	55	0	0	0	0	0	0	0	0	0	0	0	0	0	0	0	0	0
OTU4445	0	0	0	0	0	0	0	0	0	0	0	0	0	0	0	0	26	0	0	0	0	0	0	0	0	0	0	0	0	0	0	22	0	19	0	16	0	0	0	0	0	0	0	0	0	0	0	0	0
OTU4446	0	4	0	0	0	0	0	0	0	0	0	43	31	0	47	28	0	0	0	0	0	0	0	0	0	0	0	0	0	0	0	0	0	0	0	0	0	0	0	0	0	0	0	0	0	0	0	0	0
OTU4449	0	0	0	0	15	21	0	0	0	0	0	10	4	10	7	11	0	0	0	0	0	0	0	0	0	0	0	0	10	0	0	0	0	0	0	0	0	0	0	0	0	0	0	0	0	0	0	0	0
OTU4456	0	0	0	30	0	0	0	0	0	0	34	0	0	0	0	0	0	0	0	0	0	0	0	0	0	0	0	0	0	0	0	0	0	0	0	0	0	0	0	0	0	0	0	0	0	0	0	0	0
OTU4459	0	0	0	0	0	0	0	0	0	0	0	0	0	0	0	0	0	0	0	0	0	0	0	0	0	0	0	0	0	0	138	0	0	0	0	0	0	0	0	0	0	0	0	0	0	0	0	0	0
OTU4462	15	0	17	9	0	4	0	0	0	0	0	0	0	0	0	0	0	0	0	0	0	0	0	0	0	0	0	0	0	0	0	0	0	0	0	0	0	0	0	0	0	0	0	0	0	0	0	0	0
OTU4466	0	0	0	0	0	0	0	0	0	0	0	0	0	0	0	0	0	0	0	0	0	0	8	0	0	12	0	26	0	0	0	0	0	0	23	0	0	0	0	0	0	0	0	0	0	0	0	0	0
OTU4470	0	417	0	5	0	6	0	0	0	0	0	5	8	0	0	0	0	0	0	0	0	0	0	0	0	0	0	0	0	0	0	0	0	0	0	0	0	0	0	0	0	0	0	0	0	0	0	0	0
OTU4471	0	0	0	0	0	0	0	0	0	0	0	0	0	0	7	0	124	0	0	0	0	0	0	7	0	0	0	0	0	0	0	0	0	0	0	0	0	0	0	0	0	0	0	0	0	0	0	0	0
OTU4472	9	0	0	0	0	0	0	0	0	0	0	26	0	0	0	0	0	0	0	0	0	18	0	46	19	0	0	0	19	0	0	0	0	61	0	46	0	6	0	29	14	0	0	0	0	0	0	0	0
OTU4475	0	0	0	0	6	0	0	0	0	0	0	6	0	5	0	20	19	9	0	0	0	0	0	16	15	0	0	0	0	0	0	15	0	13	0	10	0	0	0	5	0	0	0	0	0	0	0	0	12
OTU4476	0	0	0	0	16	44	0	0	0	0	0	19	13	40	6	0	11	13	0	10	0	0	0	23	0	0	0	0	0	0	0	11	0	0	0	0	0	0	0	0	0	0	0	0	0	11	0	0	0
OTU4477	0	0	0	0	0	0	0	0	0	0	0	49	33	51	42	21	117	0	0	0	0	0	0	0	0	0	0	0	0	0	0	0	0	0	0	0	0	0	0	0	0	0	0	0	0	0	0	0	0
OTU4478	0	0	41	0	0	0	0	0	38	0	0	0	0	0	0	0	0	0	0	0	0	0	0	0	0	0	0	0	0	0	0	0	0	0	0	0	0	0	0	0	0	0	0	0	0	0	0	0	0
OTU4483	0	0	0	0	0	0	0	20	0	0	0	0	0	0	0	0	0	0	0	0	0	0	0	0	0	0	0	0	0	0	0	0	0	0	0	0	0	0	0	0	0	0	0	0	0	0	0	0	0
OTU449	57	0	98	115	15	27	0	52	32	69	0	16	0	13	0	0	13	0	76	0	36	0	32	16	0	44	37	58	38	30	34	68	24	17	40	5	33	20	51	0	10	0	37	0	0	11	0	16	0
OTU4493	0	0	0	0	0	0	0	0	0	0	0	33	37	0	0	0	33	0	0	0	0	0	0	0	0	0	0	0	0	0	0	0	0	21	0	23	0	11	0	0	0	0	0	0	0	0	0	0	0
OTU4494	0	0	0	0	0	0	0	0	0	0	0	0	0	0	0	0	0	0	0	0	0	0	0	0	0	0	0	0	0	0	0	0	0	0	0	0	0	0	0	0	0	0	0	0	0	0	0	0	0
OTU4499	0	0	0	17	0	0	0	21	0	0	0	0	0	0	0	0	0	0	0	0	33	0	7	0	0	0	0	13	0	0	0	89	0	0	0	0	0	0	0	0	0	0	0	0	0	0	0	0	0
OTU4501	10	0	14	9	0	0	0	0	0	0	0	0	0	0	0	0	0	0	0	0	0	0	0	0	0	0	0	0	0	0	0	0	0	0	0	0	0	0	0	0	0	0	0	0	0	0	0	0	0
OTU4504	22	0	19	36	0	0	0	32	0	12	0	0	0	0	0	0	0	0	0	0	0	0	0	0	0	31	32	0	0	0	0	17	0	0	0	0	0	0	0	0	0	0	0	0	0	0	0	0	0
OTU452	0	0	0	0	0	0	0	4	0	0	0	0	0	3	0	0	0	0	0	0	0	0	2	0	0	3	3	0	0	0	4	0	0	0	0	2	0	0	0	0	0	0	3	23	19	0	0	0	0
OTU4519	0	0	0	0	0	0	0	0	0	0	0	0	0	0	0	0	0	0	0	0	0	0	0	0	0	53	0	0	0	0	0	0	0	0	0	0	0	0	0	0	0	0	0	0	0	0	0	0	0
OTU4528	0	0	43	39	0	0	0	0	0	47	0	0	0	0	0	0	0	0	0	0	0	0	0	0	0	0	0	0	0	0	0	0	0	0	0	0	0	0	0	0	0	0	0	0	0	0	0	0	0
OTU4530	0	0	0	0	18	29	0	0	0	0	0	0	0	0	0	0	0	0	0	0	0	0	0	0	0	0	0	0	54	0	11	25	0	15	0	14	0	7	0	32	0	0	0	0	0	20	0	13	12
OTU4536	0	0	28	0	0	0	0	0	0	0	0	0	0	0	0	0	0	0	30	0	179	0	0	0	0	0	0	0	0	0	0	0	0	0	0	0	0	0	0	0	0	0	0	0	0	0	0	0	0
OTU4537	0	0	0	0	11	61	0	0	0	0	0	0	0	0	0	4	0	0	0	0	0	0	0	0	0	0	0	0	0	0	0	0	0	0	0	0	0	0	0	0	0	0	0	0	0	0	0	0	0
OTU4538	0	0	0	0	10	0	0	0	0	0	0	16	8	16	6	0	17	0	0	0	0	0	0	0	0	0	0	0	0	0	12	0	0	0	0	10	0	0	0	0	0	0	0	0	0	0	0	17	0
OTU4539	0	0	0	0	0	0	0	0	0	0	0	0	0	0	0	0	0	0	0	0	0	0	0	0	0	0	0	0	0	0	0	0	0	0	0	0	0	0	0	0	0	0	0	0	0	0	0	0	0
OTU4542	0	0	0	0	0	0	0	0	0	0	0	0	0	14	8	0	0	0	0	0	0	7	0	0	0	0	0	0	0	0	0	0	0	23	0	0	0	0	0	0	0	0	0	0	44	0	0	0	0
OTU4543	0	0	0	0	0	0	0	0	0	0	0	26	8	205	39	0	0	0	0	0	0	0	0	10	0	0	0	0	0	0	0	0	0	0	0	25	0	29	0	11	0	0	0	0	0	0	0	21	0
OTU4546	0	14	0	0	17	38	0	0	0	0	0	0	0	0	13	0	0	0	0	0	0	0	0	0	0	0	0	0	0	0	0	0	0	0	0	0	0	0	0	0	0	0	0	0	0	0	0	0	0
OTU4549	0	0	0	0	13	0	11	0	0	0	0	12	6	5	11	19	33	6	0	0	0	4	0	9	6	0	0	0	0	0	0	24	0	15	0	21	0	10	0	13	14	0	0	0	0	0	0	0	0
OTU4552	18	0	0	23	25	0	0	25	22	0	0	0	0	0	0	0	0	0	0	0	0	0	0	0	0	0	0	0	0	0	0	0	0	0	0	0	0	0	0	0	0	0	0	0	0	0	0	0	0
OTU4555	0	0	0	0	0	0	0	40	0	0	0	0	0	0	0	0	0	0	0	0	0	0	0	0	0	79	0	0	45	0	0	0	0	0	0	0	0	0	0	0	0	0	0	0	0	0	0	0	0
OTU4556	0	0	0	0	0	0	0	0	0	0	0	0	0	0	0	0	0	0	0	0	0	0	0	0	0	0	0	0	0	0	0	0	0	0	0	0	0	0	0	0	0	0	0	0	0	0	0	0	0
OTU456	146	0	189	93	28	0	10	54	14	37	13	0	0	0	0	0	0	0	74	0	109	0	27	0	0	51	10	63	40	0	43	69	15	18	248	26	143	35	46	0	0	0	106	0	14	0	0	32	19
OTU4559	0	0	0	0	0	0	0	0	0	0	0	0	0	0	0	0	0	0	0	0	0	0	0	0	0	0	0	0	0	0	0	0	0	0	0	0	0	0	0	0	0	0	0	0	0	0	0	0	0
OTU4564	0	0	0	0	9	0	0	0	0	0	0	21	25	18	15	17	52	17	0	9	0	12	0	16	20	0	0	0	13	0	12	23	0	17	0	0	0	0	0	15	14	0	0	0	0	0	0	0	0
OTU4566	28	0	17	32	0	0	0	0	18	13	0	0	0	0	0	0	0	0	14	0	0	0	0	0	0	14	0	0	0	0	0	28	0	0	32	0	25	0	25	0	0	0	25	0	0	0	0	0	8
OTU4571	0	0	0	9	0	0	0	0	0	0	0	0	0	0	0	0	0	0	0	0	0	0	0	0	0	0	0	0	0	0	0	0	0	0	0	0	0	0	0	0	0	0	0	0	0	0	0	0	0
OTU4573	0	0	0	0	0	0	10	0	0	0	0	0	20	0	0	0	28	0	0	0	0	20	0	4	0	0	0	0	11	0	43	27	0	19	0	21	0	32	0	17	0	0	0	0	32	0	0	0	9
OTU4576	31	0	0	0	0	0	0	14	0	0	0	0	0	0	0	0	0	0	0	0	6	0	14	0	0	0	0	0	0	0	0	0	0	0	0	0	0	0	0	0	0	0	0	0	0	0	0	0	0
OTU458	61	0	34	0	0	0	0	42	32	67	0	0	0	0	0	0	0	0	90	0	0	0	34	0	0	75	169	60	0	0	0	32	0	0	54	0	36	0	71	0	0	0	104	9	0	0	0	0	0
OTU4583	0	0	0	0	12	7	0	0	0	0	0	10	13	0	16	8	0	28	0	12	0	0	0	13	14	0	0	0	37	0	0	0	0	0	0	0	0	22	0	19	0	0	0	0	0	0	0	0	0
OTU4587	9	0	12	0	0	0	0	0	10	0	0	0	0	0	0	0	0	0	0	0	0	0	0	0	0	0	0	0	0	0	0	0	0	0	0	0	0	0	0	0	0	0	0	0	0	0	0	0	0
OTU4588	0	0	0	0	6	10	0	0	0	0	0	7	0	0	14	19	12	7	0	0	0	0	0	10	0	0	0	0	0	0	24	23	0	9	0	8	0	7	0	16	14	0	0	0	0	0	0	0	0
OTU4590	14	0	27	31	0	0	0	6	4	0	0	0	0	0	0	0	0	0	0	0	0	0	0	0	0	0	0	0	0	0	0	0	0	0	0	0	0	0	0	0	0	0	0	0	0	0	0	0	0
OTU4591	0	0	0	0	0	27	0	0	0	0	0	0	0	0	0	0	0	0	0	0	0	0	0	0	0	0	0	0	96	0	0	0	0	0	0	0	0	0	0	0	0	0	0	0	0	0	0	0	0
OTU460	0	0	0	0	0	0	0	0	0	0	0	0	0	0	0	0	0	0	0	0	0	0	0	0	0	0	0	0	0	0	0	0	0	0	0	0	0	0	0	0	0	0	0	0	0	0	0	0	0
OTU4600	8	0	24	26	17	0	0	0	0	0	0	0	0	0	0	0	0	0	56	0	80	0	0	0	0	0	0	0	0	0	0	0	0	29	0	16	0	11	0	0	8	0	0	0	0	0	0	0	0
OTU4603	0	0	0	0	0	17	0	0	0	0	0	0	0	0	9	21	0	0	0	0	0	0	0	0	0	0	0	0	0	0	0	0	0	0	0	0	0	0	0	0	0	0	0	0	0	0	0	0	0
OTU4606	0	0	0	0	0	0	0	0	0	0	0	35	16	23	0	47	0	0	0	11	0	0	0	11	12	0	0	0	0	0	0	0	0	0	0	0	0	0	0	0	19	0	0	0	0	0	0	0	0
OTU4608	16	0	16	0	0	0	0	0	0	10	0	0	17	40	25	0	0	0	0	0	0	0	0	0	0	0	0	0	0	0	0	0	0	0	0	0	0	0	0	0	0	0	0	0	0	0	0	0	0
OTU4609	0	0	0	0	0	0	0	0	0	0	0	0	0	0	0	0	0	0	105	0	118	0	0	0	0	0	0	0	0	0	0	0	0	0	0	0	0	0	0	0	0	0	0	0	0	0	0	0	0
OTU4610	21	0	0	28	0	0	0	0	0	0	0	0	0	0	0	0	0	0	20	0	18	0	0	0	0	20	0	0	0	0	0	0	0	0	0	0	0	0	0	0	0	0	0	0	0	0	0	0	0
OTU4611	0	0	0	0	0	0	0	0	0	0	0	0	0	0	0	0	0	0	0	0	0	0	0	0	0	0	0	0	70	0	0	0	0	21	0	0	0	0	0	0	0	0	0	0	0	0	0	0	25
OTU4612	0	0	0	0	0	0	0	0	0	0	0	0	0	0	0	0	0	0	0	0	0	0	0	0	0	0	0	0	0	0	0	0	0	0	0	0	0	0	0	0	0	0	0	0	0	0	0	0	0
OTU4614	0	0	0	0	16	0	0	0	0	0	0	0	0	0	0	0	0	0	0	0	0	0	0	0	0	0	0	0	0	0	0	0	0	0	0	0	0	0	0	0	0	0	0	0	0	0	0	0	0
OTU462	0	14	0	0	87	29	0	0	0	0	0	29	67	127	63	0	55	0	0	0	0	48	0	0	0	0	0	0	52	0	30	72	0	171	0	0	0	0	0	49	0	0	0	0	0	0	0	0	0
OTU4620	0	0	0	0	0	0	0	0	0	0	0	0	0	0	0	0	0	0	0	0	0	0	0	0	0	0	0	0	0	0	0	0	0	0	0	0	0	0	0	0	0	0	0	0	0	0	0	0	0
OTU4626	12	0	18	15	0	0	0	44	0	26	0	0	6	0	0	0	0	0	33	0	29	0	19	0	0	14	0	0	0	0	0	0	15	0	0	0	0	0	0	0	0	0	0	0	0	0	0	0	0
OTU4633	0	0	18	0	0	0	0	0	0	0	0	0	0	0	0	0	0	0	0	0	0	0	0	0	0	0	0	0	0	0	0	0	0	0	0	0	0	0	0	0	0	0	0	0	0	0	0	0	0
OTU4640	11	0	17	29	10	9	0	0	17	0	0	0	0	0	0	0	0	0	0	0	0	0	10	0	0	9	0	6	0	7	15	32	0	0	0	0	0	6	0	0	28	0	0	0	0	0	0	0	0
OTU4643	0	0	0	0	0	0	0	0	0	0	0	0	0	0	0	0	0	0	0	0	0	0	0	0	0	0	0	0	0	0	0	0	0	0	0	0	0	0	0	0	0	0	0	0	0	0	0	0	0
OTU4645	0	0	0	0	0	0	0	0	0	0	0	10	0	0	0	0	0	0	0	0	0	0	0	0	0	0	0	0	12	0	0	25	0	11	0	14	0	0	0	0	9	0	0	0	0	0	0	0	0
OTU4647	17	0	15	0	0	4	0	0	0	0	0	0	0	0	0	32	0	0	0	0	0	0	0	0	0	0	0	0	0	0	0	0	0	0	0	0	0	0	0	0	0	0	0	0	0	0	0	0	0
OTU4648	23	0	57	44	0	0	0	18	0	0	0	0	0	0	0	0	0	0	0	0	0	0	0	0	0	0	0	0	0	0	0	0	0	0	0	0	0	0	0	0	0	0	0	0	0	0	0	0	0
OTU4649	0	0	0	0	38	0	0	0	0	0	0	27	0	29	0	0	0	0	0	0	0	0	0	0	0	0	0	0	0	0	0	0	0	0	0	0	0	0	0	0	0	0	0	0	0	0	0	0	0
OTU4652	11	0	20	9	0	0	0	8	0	0	0	0	0	0	0	0	0	0	0	0	7	0	0	0	0	0	0	0	18	0	0	0	0	0	0	0	0	0	0	0	0	0	0	0	0	0	0	0	0
OTU4653	0	0	0	0	0	0	0	0	0	0	0	0	0	0	0	0	0	0	0	0	0	0	0	0	0	0	0	0	0	0	0	0	0	16	0	21	0	9	0	0	0	0	0	0	0	0	0	0	0
OTU4658	0	0	0	0	0	0	0	0	0	0	0	0	0	0	0	0	0	0	0	0	0	0	0	0	0	0	0	0	0	0	0	0	0	0	0	0	0	0	0	0	0	0	0	0	0	0	0	0	0
OTU4659	0	0	26	0	0	0	0	0	0	0	0	0	0	0	0	0	0	0	28	0	166	0	0	0	0	0	0	0	0	0	0	0	0	0	0	0	0	0	0	0	0	0	10	0	0	0	0	0	0
OTU4661	15	0	13	0	0	10	0	0	0	0	0	0	9	0	0	0	11	0	15	0	16	0	0	0	0	5	6	0	0	16	0	6	8	0	0	0	0	4	13	0	11	0	0	0	0	0	0	0	0
OTU4671	0	0	0	0	0	0	0	0	0	0	0	13	23	46	21	0	51	13	0	11	0	0	0	0	0	0	0	0	17	0	0	0	0	0	0	0	0	0	0	0	0	0	0	0	0	0	0	0	0
OTU4672	0	0	0	0	0	0	0	0	0	0	0	0	0	7	0	0	9	0	0	0	0	0	0	0	0	0	0	0	0	0	0	0	0	0	0	0	0	0	0	0	0	0	0	0	0	0	0	0	0
OTU4674	0	0	0	0	0	0	0	0	0	0	0	25	34	57	0	16	32	0	0	0	0	0	0	7	0	0	0	0	12	0	0	0	0	0	0	0	0	0	0	0	0	0	0	0	0	0	0	8	0
OTU4675	0	0	0	0	0	0	0	0	0	0	0	0	0	0	0	0	0	0	0	0	0	0	0	0	0	0	0	49	0	10	0	0	0	0	0	0	0	0	0	0	0	0	7	0	0	0	0	0	0
OTU4677	0	0	0	0	0	0	0	0	0	0	0	0	0	0	0	28	22	16	21	23	20	0	15	17	30	0	0	0	0	0	0	0	0	0	0	0	0	0	0	0	38	0	0	0	0	0	0	0	0
OTU4681	0	0	0	0	0	0	0	0	0	0	0	0	0	0	0	0	0	0	0	0	0	0	0	0	0	0	0	0	0	0	0	0	0	0	0	0	0	0	0	0	0	0	0	0	0	0	0	0	0
OTU4683	0	0	0	0	0	0	0	0	0	0	0	0	0	0	0	0	15	0	0	0	0	0	0	0	0	0	0	0	23	0	14	33	0	0	0	0	0	0	0	14	0	0	0	0	0	0	0	0	0
OTU4684	0	0	0	0	0	0	0	0	0	0	0	0	68	215	0	0	0	0	0	0	0	0	0	0	0	0	0	0	0	0	0	0	0	0	0	0	0	0	0	0	0	0	0	0	0	0	0	0	0
OTU4685	26	0	16	13	0	0	0	9	4	0	0	0	0	17	0	0	0	0	0	0	0	0	0	0	0	0	0	0	0	0	0	0	0	0	0	0	0	0	0	0	0	0	0	0	0	0	0	0	0
OTU4686	15	0	0	12	0	0	0	7	3	0	0	0	0	9	0	0	0	0	9	0	4	0	0	0	0	6	0	0	0	0	0	13	0	0	42	0	25	0	0	0	0	0	10	0	6	0	0	0	0
OTU4688	0	0	0	0	0	0	0	0	0	0	0	26	25	22	10	35	0	0	0	0	0	0	0	0	12	0	0	0	0	0	0	0	0	0	0	0	0	0	0	0	0	0	0	0	0	0	0	0	0
OTU469	27	6	0	0	29	0	0	0	95	44	783	0	0	0	0	0	0	0	0	0	0	0	0	0	0	0	0	0	0	0	0	0	0	0	0	0	0	0	0	0	0	0	0	0	0	0	0	0	0
OTU4689	0	0	0	0	0	4	0	0	0	0	13	0	0	0	0	0	0	0	0	0	0	0	0	0	0	0	0	0	0	0	0	0	0	0	0	0	0	0	0	0	0	0	0	0	0	0	0	0	0
OTU4696	18	0	22	26	0	0	0	24	8	27	0	0	0	0	0	0	0	0	22	0	11	0	0	0	0	24	0	42	0	0	0	0	0	0	0	0	0	0	0	0	0	0	0	0	0	0	0	0	0
OTU47	1333	0	507	937	0	0	0	1959	1401	1723	1863	0	0	0	0	0	64	0	0	0	0	0	0	0	0	0	0	0	0	0	0	0	0	0	0	0	0	0	6	0	0	0	0	0	0	0	0	0	0
OTU4699	0	0	0	0	0	0	0	0	0	0	0	0	0	0	0	0	0	0	0	0	0	0	0	0	0	0	0	0	18	0	33	17	0	27	0	16	0	0	0	0	0	0	0	0	0	0	32	28	31
OTU4705	0	0	0	0	0	0	0	0	0	0	0	0	0	0	0	0	0	0	0	0	3	0	0	0	0	4	5	0	12	0	0	4	0	0	0	0	0	0	0	0	0	0	0	12	0	0	0	0	0
OTU4706	0	0	10	21	0	0	0	6	8	7	0	0	0	0	0	0	0	0	8	0	0	0	9	0	0	5	0	0	0	4	8	7	5	0	8	0	13	0	9	0	0	0	6	0	0	0	0	0	0
OTU471	53	0	0	0	0	0	0	0	149	155	0	0	0	0	0	0	0	8	0	0	0	0	17	0	0	0	365	35	0	37	0	15	138	0	0	0	0	0	16	0	0	0	0	0	0	0	0	0	0
OTU4711	0	0	0	0	0	0	0	0	0	0	0	21	0	0	33	17	9	30	0	27	0	0	0	53	31	0	0	0	8	0	0	0	0	19	0	22	0	14	0	10	0	0	0	0	0	0	0	0	0
OTU4715	0	0	0	0	0	0	0	0	0	0	0	0	0	0	0	0	12	0	0	0	0	0	0	0	0	0	0	0	0	0	0	11	0	16	0	0	0	0	0	0	314	0	0	0	0	0	0	16	0
OTU4717	16	0	15	11	0	0	0	0	4	0	0	0	0	0	0	0	0	0	18	0	35	0	0	0	0	10	0	0	19	0	0	0	0	9	0	0	0	0	0	0	0	0	0	0	0	0	0	0	0
OTU4718	0	0	0	0	0	13	0	0	0	0	0	0	0	0	20	0	0	20	0	0	0	0	0	17	0	0	0	0	0	0	0	0	0	0	0	0	0	0	0	0	0	0	0	0	0	0	0	0	0
OTU4719	0	0	0	0	18	0	0	0	0	0	0	0	0	0	0	0	0	0	0	0	0	0	0	0	0	0	0	0	0	0	0	18	0	0	0	0	0	0	0	34	0	0	0	0	0	0	0	0	0
OTU4723	0	0	0	0	24	0	0	0	0	0	0	0	14	11	15	0	18	16	0	34	0	0	0	0	0	0	0	0	32	0	0	0	0	0	0	9	0	0	0	27	16	0	0	0	0	0	0	0	0
OTU4727	0	0	0	0	20	0	0	0	0	0	0	18	27	0	9	0	0	4	0	0	0	0	0	11	22	0	0	0	0	0	0	0	0	0	0	0	0	0	0	0	0	0	0	0	0	0	0	0	0
OTU473	0	0	0	0	64	0	0	0	0	0	0	58	110	137	104	0	40	0	0	0	0	82	0	0	0	0	0	0	90	0	46	52	0	78	0	112	0	131	0	84	0	0	0	0	208	0	44	0	0
OTU4729	0	0	0	0	0	0	0	0	0	0	0	0	0	0	0	0	0	0	0	0	0	0	0	0	0	0	0	0	0	0	0	0	0	0	0	0	0	0	0	0	0	0	0	0	0	0	0	0	0
OTU4734	0	0	0	0	0	0	0	0	0	0	0	0	0	0	0	0	0	0	24	0	0	0	0	0	0	0	0	0	36	0	17	13	0	14	0	0	0	0	0	0	0	0	0	0	0	0	33	0	0
OTU4735	31	0	28	9	0	0	0	0	0	0	0	0	0	0	0	0	0	0	0	0	0	0	0	0	0	0	0	0	0	0	0	0	0	0	0	0	0	0	0	0	0	0	0	0	0	0	0	0	0
OTU4744	0	0	0	0	0	0	0	0	0	0	0	18	13	0	0	0	0	26	0	15	0	0	0	0	0	0	0	0	32	0	0	0	0	0	0	0	0	0	0	0	0	0	0	0	0	0	0	0	0
OTU4746	0	0	0	0	0	0	0	0	0	0	0	0	0	0	44	0	0	0	0	28	0	0	0	0	0	0	0	0	0	0	0	35	0	40	0	0	0	0	0	16	63	0	0	0	0	0	0	0	0
OTU4748	0	0	23	0	13	0	0	0	0	23	0	0	0	0	0	0	0	0	0	0	0	0	0	0	0	0	0	0	0	0	0	0	0	0	0	0	0	0	0	0	0	0	0	0	0	0	0	0	0
OTU4753	0	0	0	0	16	17	14	0	0	0	0	0	0	0	0	0	0	0	0	0	0	0	0	0	0	0	0	0	13	0	27	21	0	39	0	55	0	18	0	16	11	0	0	0	0	14	0	65	20
OTU4757	0	24	0	25	0	34	0	0	32	0	19	0	0	0	0	0	0	0	0	0	0	0	0	0	0	0	0	0	0	0	0	0	0	0	0	0	0	0	0	0	0	0	0	0	0	0	0	0	0
OTU4760	0	0	0	0	0	0	0	0	0	0	0	0	0	0	0	0	0	0	0	0	0	0	0	0	0	0	0	0	115	0	0	0	0	0	0	0	0	0	0	0	0	0	0	0	0	31	0	25	35
OTU4764	0	0	0	0	0	0	0	0	0	0	0	0	16	52	10	0	62	0	0	0	0	0	0	0	0	0	0	0	32	0	0	0	0	0	0	0	0	0	0	0	0	0	0	0	0	0	0	0	0
OTU4767	6	0	0	0	0	0	0	0	3	0	54	0	0	0	0	0	0	0	3	0	0	0	0	0	0	3	7	2	55	0	0	0	0	0	0	0	0	0	0	0	0	5	0	0	0	0	0	0	0
OTU4772	0	0	0	0	39	35	0	0	0	0	0	37	44	17	0	13	22	0	0	0	0	0	0	16	31	0	0	0	0	0	0	0	0	0	0	0	0	0	0	0	0	0	0	0	0	0	0	0	0
OTU4773	0	0	0	0	0	0	0	0	0	0	0	43	30	45	10	36	18	15	0	0	0	0	0	0	21	0	0	0	0	0	0	0	0	0	0	0	0	0	0	0	0	0	0	0	0	0	0	0	0
OTU4777	0	0	0	0	0	0	0	0	0	0	0	149	77	16	40	0	0	10	0	0	0	0	0	0	0	0	0	0	0	0	0	0	0	0	0	0	0	0	0	0	0	0	0	0	0	0	0	0	0
OTU4782	0	0	0	0	0	0	0	0	0	0	0	0	0	0	68	0	0	0	0	0	0	0	0	0	0	0	0	0	0	0	0	0	0	0	0	0	0	0	0	0	0	0	0	0	0	0	0	0	0
OTU4788	14	0	38	0	6	9	0	15	0	0	0	0	0	0	0	0	0	0	0	0	0	0	0	0	0	0	0	0	0	0	0	0	0	0	0	0	0	0	0	0	0	0	0	0	0	0	0	0	0
OTU4790	0	0	0	0	0	0	0	0	0	0	0	18	0	8	5	11	0	20	0	0	0	15	0	34	14	0	0	0	0	0	0	0	0	0	0	0	0	0	0	0	0	0	0	0	0	0	0	0	0
OTU4792	0	0	0	0	0	0	0	0	0	0	0	0	0	0	0	0	0	0	0	0	0	0	0	0	0	0	0	0	0	0	0	0	0	0	0	0	0	0	0	0	0	0	0	0	0	0	0	0	0
OTU4793	0	0	0	0	0	0	0	0	0	0	0	0	0	0	0	0	0	0	0	0	0	0	0	0	0	0	0	0	0	0	0	0	0	0	0	0	0	0	0	0	0	0	0	0	0	0	0	0	0
OTU4796	0	0	0	0	30	0	0	0	0	0	0	0	0	0	0	0	0	0	0	0	0	0	0	0	0	0	0	0	0	0	0	18	0	29	0	34	0	52	0	27	25	0	0	0	0	0	0	0	0
OTU4805	28	0	0	0	0	46	0	0	39	24	0	0	0	0	0	0	0	0	0	0	0	0	0	0	0	0	0	0	0	0	0	0	0	0	0	0	0	0	0	0	0	0	0	0	0	0	0	33	10
OTU481	0	23	313	14	242	83	0	0	0	0	0	28	72	426	51	132	212	80	0	92	0	206	0	146	16	0	0	0	0	0	0	0	0	0	0	0	0	0	0	0	0	0	0	0	0	0	0	0	0
OTU4809	0	0	0	0	0	0	0	0	0	0	0	0	0	0	0	0	0	0	0	0	0	0	0	0	0	0	0	0	0	0	0	0	0	0	0	0	0	0	0	0	0	0	0	0	0	0	0	0	0
OTU4813	0	0	42	64	0	0	0	0	0	0	0	0	0	0	0	0	0	0	0	0	0	0	0	0	0	0	0	0	0	0	0	0	0	0	0	0	0	0	0	0	0	0	0	0	0	0	0	0	0
OTU4814	0	0	0	0	0	0	0	0	0	0	0	0	0	0	0	0	0	0	0	0	0	0	0	0	0	0	0	0	0	0	0	0	0	0	0	0	0	0	0	0	0	0	0	0	0	0	0	0	0
OTU4815	0	0	0	0	13	0	0	0	0	0	0	18	12	9	6	16	9	7	0	7	0	0	0	10	25	0	0	0	0	0	0	0	0	0	0	0	0	0	0	0	0	0	0	0	0	0	0	0	0
OTU4816	0	0	0	0	0	0	0	0	0	0	0	0	0	0	60	0	0	0	0	0	0	0	0	91	0	0	0	0	0	0	0	10	0	36	0	46	0	36	0	0	0	0	0	0	0	0	0	0	0
OTU4820	0	0	0	14	0	0	0	0	25	33	0	0	0	0	0	0	0	0	0	0	0	0	0	0	0	0	0	0	24	47	0	0	0	0	0	0	0	0	0	0	0	0	0	0	0	0	0	0	0
OTU4822	0	0	0	0	38	0	0	0	0	0	0	0	0	0	0	0	0	0	0	0	0	0	0	0	0	0	0	0	0	0	0	0	0	0	0	0	0	0	0	0	0	0	0	0	0	0	0	30	0
OTU4823	0	0	0	0	0	0	0	0	18	21	0	0	0	0	0	0	0	0	0	0	0	0	0	0	0	0	0	0	0	0	0	0	0	0	0	0	14	0	106	0	0	0	0	0	0	0	0	0	0
OTU4827	19	0	0	6	0	0	0	0	0	0	80	0	0	0	0	0	0	0	0	0	0	0	0	0	0	0	0	0	0	0	0	0	0	0	0	0	0	0	0	0	0	0	0	0	0	0	0	0	0
OTU4828	14	0	20	46	22	14	0	0	0	0	0	0	0	0	0	0	0	0	0	0	0	0	0	0	0	0	0	0	0	0	0	0	0	0	0	0	0	0	0	0	0	0	0	0	0	0	0	0	0
OTU4834	0	0	0	31	0	0	0	0	0	0	0	0	0	0	0	0	0	0	0	0	0	0	0	0	0	0	0	0	0	0	0	0	0	0	0	0	0	0	0	0	0	0	0	0	0	0	0	0	0
OTU4838	0	0	0	0	0	0	0	0	0	0	0	0	0	0	0	0	0	0	0	0	0	16	0	0	0	0	0	0	0	0	0	0	0	0	0	0	0	0	0	0	0	0	0	0	0	0	0	0	0
OTU4847	13	0	10	33	0	0	0	11	16	11	0	0	0	0	0	0	35	0	0	0	0	50	28	0	0	14	20	16	0	0	8	24	11	0	0	6	0	24	0	11	0	0	0	0	0	0	0	0	0
OTU4848	0	0	0	0	0	8	29	0	0	0	0	0	0	0	0	0	0	0	0	0	0	0	0	0	0	0	0	0	21	0	0	22	0	0	0	0	0	0	0	27	9	0	0	0	0	0	0	0	0
OTU4856	40	0	24	0	0	0	0	0	0	43	0	0	0	0	0	0	0	0	0	0	0	0	0	0	0	0	0	0	0	13	0	0	13	0	0	0	0	0	0	0	0	0	0	0	0	0	0	0	0
OTU4857	8	0	0	18	0	0	11	17	0	0	0	0	0	9	10	0	17	6	0	0	0	0	0	0	0	0	0	0	0	0	0	33	0	7	0	0	0	0	0	0	12	0	0	0	0	0	0	0	9
OTU4858	0	0	0	0	0	18	0	0	0	0	0	18	10	0	0	0	0	0	0	0	0	15	0	0	0	0	0	0	0	0	11	15	0	0	0	0	0	0	0	0	0	0	0	0	0	0	0	0	25
OTU4860	0	0	0	0	0	0	0	0	0	0	0	0	12	35	0	0	207	0	0	0	0	0	0	0	0	0	0	0	0	0	0	0	0	0	0	0	0	0	0	0	0	0	0	0	0	0	0	0	0
OTU4861	0	6	0	0	22	21	0	0	0	0	0	0	0	0	0	0	0	0	0	0	0	0	0	0	0	0	0	0	0	0	0	0	0	0	0	0	0	0	0	0	0	0	0	0	0	0	0	0	0
OTU4863	8	0	0	0	0	0	0	0	0	0	0	0	0	0	0	0	0	0	0	0	0	0	0	0	0	0	0	0	0	0	0	0	0	0	0	0	0	0	0	0	0	0	0	0	0	0	0	0	0
OTU4866	0	0	0	0	62	33	0	0	0	0	0	0	0	0	30	27	0	0	0	0	0	0	0	0	124	0	0	0	0	0	0	0	0	0	0	0	0	0	0	0	0	0	0	0	0	0	0	0	0
OTU4868	0	0	10	0	5	0	0	0	0	0	0	0	0	0	0	0	0	0	0	0	11	0	0	0	0	0	0	0	9	0	7	13	0	0	0	0	0	8	0	0	0	0	0	0	0	3	0	7	0
OTU4869	0	0	0	0	38	0	0	0	0	0	0	0	0	0	72	0	0	0	0	0	0	0	0	0	0	0	0	0	0	0	0	0	0	0	0	0	0	0	0	0	0	0	0	0	0	0	0	0	0
OTU4872	0	0	0	0	0	0	0	0	0	0	0	0	0	0	0	0	0	0	0	0	0	0	0	0	0	0	0	0	0	5	0	0	0	0	0	0	0	0	0	0	0	0	0	3	0	0	0	0	0
OTU4873	0	0	29	37	0	0	0	0	0	0	0	0	0	0	0	0	0	0	0	0	0	0	0	0	0	0	0	0	0	0	0	0	0	0	0	0	0	0	0	0	0	0	0	0	0	0	0	0	0
OTU4877	0	0	0	0	0	0	0	0	0	0	0	0	0	0	0	0	142	0	0	0	0	0	0	0	0	0	0	0	0	0	0	0	0	0	0	0	0	0	0	0	0	0	0	0	0	0	0	0	0
OTU4880	6	0	5	0	0	0	0	0	0	0	0	0	0	0	0	0	0	0	0	0	0	0	0	0	0	0	0	0	15	0	0	32	0	0	0	0	0	0	0	0	0	0	0	0	0	0	0	0	0
OTU4882	0	0	0	53	0	0	0	0	0	0	0	0	0	0	0	0	0	0	0	0	0	0	0	0	0	0	0	0	0	0	0	0	0	0	0	0	0	0	0	0	0	0	0	0	0	0	0	0	0
OTU4886	36	0	85	24	0	0	0	29	8	10	0	0	0	0	0	0	0	0	0	0	0	0	0	0	0	0	0	0	0	0	0	0	0	0	0	0	0	0	0	0	0	0	0	0	0	0	0	0	0
OTU4890	11	0	0	10	0	13	0	0	0	7	0	0	0	0	8	0	4	0	0	0	0	0	0	0	0	0	0	0	0	0	0	0	0	0	0	0	0	0	0	0	0	0	0	0	0	0	0	0	0
OTU4892	0	0	0	0	18	0	0	0	0	0	0	0	0	0	0	13	63	0	0	0	0	0	0	9	20	0	0	0	0	0	0	0	0	0	0	0	0	0	0	0	0	0	0	0	0	0	0	0	0
OTU4896	8	2	12	25	12	21	0	10	6	18	0	0	0	0	5	0	0	0	0	0	0	0	0	0	0	0	0	0	0	0	0	0	0	0	0	0	0	0	0	0	0	0	0	0	0	0	0	0	0
OTU4898	40	0	41	60	0	0	0	0	24	33	0	0	0	0	0	0	0	0	0	0	0	0	0	0	0	0	0	0	0	0	0	0	0	0	0	0	0	0	0	0	0	0	0	0	0	0	0	0	0
OTU49	5	5	0	0	14	0	0	20	19	0	0	0	0	0	0	0	88	0	13	0	35	0	21	0	0	0	0	8	108	6	0	107	20	0	46	0	238	8	81	8	0	0	372	112	390	0	0	0	0
OTU4905	0	0	0	0	0	0	0	0	0	0	0	0	0	0	0	0	0	0	0	0	0	47	0	0	0	0	0	0	28	0	0	29	0	0	0	0	20	0	14	0	19	0	16	0	0	0	0	0	0
OTU4906	0	0	20	0	0	0	0	11	0	0	0	0	0	0	0	0	0	0	0	0	0	0	0	0	0	11	0	0	0	0	0	0	0	0	0	0	0	0	0	0	0	0	0	0	0	0	0	0	0
OTU4907	0	0	0	0	0	162	0	0	0	0	0	0	0	0	0	0	0	0	0	0	0	0	0	59	0	0	0	0	0	0	0	31	0	0	0	0	0	0	0	0	36	0	0	0	0	0	0	0	0
OTU4911	0	0	18	0	35	0	0	0	0	45	3	0	0	0	12	0	0	0	0	0	0	0	0	0	0	0	0	0	0	0	0	0	0	0	0	0	0	0	0	0	0	0	0	0	0	0	0	0	0
OTU4912	0	0	0	0	12	0	0	0	0	0	0	26	74	26	5	0	9	9	0	16	0	0	0	41	0	0	0	0	9	0	0	0	0	0	0	0	0	0	0	0	0	0	0	0	0	0	0	0	0
OTU4915	5	0	0	0	0	0	0	0	0	0	0	0	0	0	0	0	0	0	18	0	14	0	0	0	0	8	0	12	0	0	0	0	0	0	19	0	14	0	0	0	0	0	0	0	0	0	0	0	0
OTU4916	65	20	0	2	0	247	0	6	4	12	0	0	0	0	0	0	0	0	0	0	0	0	0	0	0	0	0	0	5	4	0	2	0	0	0	0	0	0	0	0	0	4	0	0	0	0	0	0	0
OTU4917	0	0	9	0	16	11	0	0	0	5	0	11	0	0	13	0	0	0	0	0	0	0	0	0	0	0	0	0	0	0	0	0	0	0	0	0	0	0	0	0	0	0	0	0	0	0	0	0	0
OTU4918	4	0	0	16	14	0	0	0	0	0	0	18	19	30	0	0	0	0	0	0	0	0	0	0	0	0	0	0	0	0	0	0	0	0	0	0	0	0	0	0	0	0	0	0	0	0	0	0	0
OTU4919	0	0	0	0	0	0	0	0	0	0	0	0	0	0	0	0	0	0	0	0	0	0	0	0	0	0	0	0	0	0	0	0	0	0	0	0	0	0	0	0	0	0	0	0	0	0	0	0	0
OTU4922	16	0	43	60	14	8	0	18	0	0	0	0	0	0	0	0	0	0	0	0	0	0	0	0	0	0	0	0	0	0	0	0	0	0	0	0	0	0	0	0	0	0	0	0	0	0	0	0	0
OTU4925	0	0	0	0	0	0	0	0	0	0	0	0	0	0	0	0	177	0	0	0	0	0	0	0	0	0	0	0	0	0	0	0	0	0	0	0	0	0	0	0	0	0	0	0	0	0	0	0	0
OTU4926	0	0	0	0	0	0	0	0	0	0	0	48	44	59	35	16	41	0	0	0	0	0	0	0	0	0	0	0	0	0	0	0	0	0	0	0	0	0	0	0	0	0	0	0	0	0	0	0	0
OTU4932	7	47	0	7	0	7	0	7	0	0	0	14	0	0	0	0	34	0	0	0	0	181	0	0	0	0	0	0	0	0	0	0	0	0	0	0	0	0	0	0	0	0	0	0	0	0	0	0	0
OTU4933	0	0	0	0	0	0	0	0	0	0	0	0	0	0	0	0	0	0	0	7	0	0	0	0	12	0	0	0	0	0	0	0	0	29	0	25	0	16	0	0	37	0	0	0	0	0	0	0	0
OTU4936	0	0	0	0	0	0	0	0	0	0	0	0	0	0	0	0	0	0	0	0	0	0	0	0	0	0	0	0	0	0	0	0	0	0	0	0	0	0	0	0	0	0	0	0	0	0	0	0	0
OTU4942	0	0	0	0	0	0	0	0	0	0	0	0	0	0	27	20	0	15	0	0	0	0	0	0	14	0	0	0	0	0	0	0	0	0	0	0	0	0	0	0	0	0	0	0	0	0	0	0	0
OTU4945	23	0	0	22	0	221	0	18	7	22	0	3	0	0	10	0	31	0	5	0	0	0	0	0	0	3	0	0	0	0	0	0	0	0	0	0	0	0	0	0	0	0	0	0	0	0	0	0	0
OTU4948	0	0	9	0	0	0	0	0	0	0	0	0	0	0	0	0	0	0	0	0	0	0	0	0	0	0	0	0	0	0	0	0	0	0	0	0	0	10	0	0	0	0	0	0	0	0	0	0	0
OTU495	31	0	17	0	0	0	0	0	0	0	60	0	0	0	0	0	0	0	0	0	0	0	0	0	0	0	0	0	0	0	0	0	0	0	0	0	0	0	0	0	0	89	0	29	0	0	0	0	0
OTU4951	0	0	0	0	12	0	0	0	0	0	0	0	52	38	11	6	9	0	0	10	0	16	0	0	0	0	0	0	0	0	0	12	0	0	0	0	0	0	0	0	0	0	0	0	0	0	6	0	0
OTU4956	0	0	0	0	0	0	0	0	0	0	0	0	0	0	0	0	0	0	0	0	0	0	0	0	0	0	0	0	0	0	0	0	0	37	0	0	0	0	0	0	0	0	0	0	0	0	20	107	0
OTU4957	0	0	0	0	0	0	0	0	0	0	0	0	0	18	0	0	0	0	0	0	0	0	0	0	0	0	0	0	0	0	0	0	0	0	0	0	0	0	0	0	0	0	0	0	0	0	0	0	0
OTU4959	0	0	0	0	0	15	0	0	0	0	0	0	0	0	0	0	0	0	0	0	0	0	0	0	0	0	0	0	20	0	0	0	0	0	0	13	0	0	0	0	0	0	0	0	0	0	0	0	0
OTU4960	0	0	20	15	0	0	0	0	0	0	0	0	0	0	0	0	0	0	33	0	18	0	0	0	0	33	23	0	0	0	0	0	0	0	0	0	0	0	0	0	0	0	0	0	0	0	0	0	0
OTU4963	0	0	0	0	0	0	0	0	0	0	0	0	0	0	0	0	0	0	0	0	0	0	0	45	0	0	0	0	0	0	0	0	0	0	0	0	0	47	0	0	0	0	0	0	0	0	18	25	0
OTU4964	0	0	0	0	26	0	0	0	0	0	0	0	0	15	0	0	0	16	0	0	0	0	0	19	22	0	0	0	16	0	0	0	0	0	0	0	0	0	0	0	0	0	0	0	0	0	0	0	0
OTU4966	0	0	0	0	0	0	0	0	0	0	0	25	0	0	26	17	0	28	0	20	0	10	0	0	29	0	0	0	0	0	0	0	0	19	0	12	0	0	0	24	29	0	0	0	0	0	0	21	0
OTU497	0	0	0	9	126	130	0	0	8	0	0	40	20	90	53	71	19	22	12	21	30	30	0	55	66	2	0	0	95	0	84	187	3	0	0	0	0	0	0	47	38	0	0	0	0	0	0	0	0
OTU4971	0	0	0	0	0	0	0	0	0	0	0	0	0	0	0	0	0	0	0	0	0	0	0	0	0	0	0	0	0	0	0	0	0	0	0	0	0	0	0	0	0	0	0	160	0	0	0	0	0
OTU4975	0	0	0	0	8	0	0	0	0	0	0	0	0	0	0	0	0	0	0	0	0	0	0	0	0	0	0	0	0	0	0	0	0	0	0	0	0	0	0	0	0	0	0	0	0	0	0	0	0
OTU4977	0	0	8	0	0	0	0	3	0	0	0	0	0	0	0	0	0	0	6	0	0	0	5	0	0	0	0	0	0	0	0	0	0	0	0	0	0	0	0	0	0	0	0	0	0	0	0	0	0
OTU498	89	0	143	100	0	0	0	67	64	90	33	0	0	0	0	0	0	0	65	0	47	0	75	0	0	101	64	189	0	24	0	77	27	0	38	0	23	0	73	0	23	10	97	0	0	0	0	0	44
OTU4982	0	9	0	0	16	39	0	0	0	0	0	10	0	0	8	7	0	0	0	0	0	0	0	0	0	0	0	0	0	0	0	0	0	0	0	0	0	0	0	0	0	0	0	0	0	0	0	0	0
OTU4983	0	0	0	0	0	0	0	0	0	0	0	0	0	0	0	0	0	0	0	0	0	0	0	0	0	0	0	0	0	0	0	0	0	0	0	0	0	39	0	0	0	0	0	0	0	0	84	0	0
OTU4984	0	0	0	36	0	8	0	0	17	0	0	0	0	0	0	0	0	0	0	0	0	0	0	0	0	0	0	0	43	0	0	0	0	0	0	0	0	0	0	0	0	0	0	0	0	0	0	0	0
OTU4988	0	0	0	0	0	0	0	0	0	0	0	0	0	0	0	0	0	0	0	0	0	0	0	0	0	0	0	0	0	0	0	0	0	0	0	0	0	0	0	0	0	0	0	0	0	0	0	55	71
OTU4989	0	0	0	0	14	11	0	0	0	0	0	0	0	10	0	0	0	0	0	10	0	16	0	0	17	0	0	0	0	0	0	0	0	0	0	0	0	0	0	0	0	0	0	0	0	0	0	0	0
OTU4991	42	0	50	40	0	0	0	10	21	11	0	0	0	0	0	0	0	0	23	0	17	0	14	0	0	20	12	12	0	0	0	21	0	0	0	0	0	0	0	0	0	0	0	0	0	0	0	0	0
OTU4992	0	0	0	0	0	0	0	0	0	0	0	0	0	0	0	0	0	0	0	0	0	0	0	0	17	0	0	0	0	0	0	0	0	0	0	0	0	0	0	0	93	0	0	0	0	0	0	0	0
OTU4993	0	0	0	0	0	0	0	0	0	0	0	0	0	0	0	0	0	0	0	0	0	0	0	0	0	0	0	0	0	0	0	0	0	0	0	0	0	0	0	0	0	0	0	0	0	0	0	0	0
OTU4999	0	0	0	0	0	0	0	0	0	0	0	0	0	0	0	0	0	0	0	0	0	0	0	0	0	0	0	0	0	0	0	0	0	0	0	0	0	0	0	0	0	0	0	0	0	0	0	0	0
OTU5003	0	0	0	0	0	0	0	0	0	0	0	0	0	0	0	0	0	0	0	0	0	0	0	0	0	0	0	0	0	0	0	0	0	0	0	0	0	0	0	0	0	0	0	0	0	0	0	0	0
OTU5006	0	0	0	0	0	43	8	0	0	0	0	0	0	13	15	30	3	6	0	0	0	0	0	0	14	0	0	0	47	0	23	22	0	0	0	0	0	0	0	0	0	0	0	0	0	0	0	0	0
OTU5007	27	0	0	0	0	0	0	42	0	0	0	0	0	0	0	0	0	0	0	0	0	0	17	0	0	0	10	20	0	0	0	0	0	0	0	0	0	8	0	0	0	0	0	0	0	0	0	0	0
OTU5008	0	0	0	0	0	0	0	0	0	0	0	0	0	0	0	0	0	0	0	0	0	0	0	0	0	0	0	0	0	0	0	0	0	0	0	0	0	0	0	0	0	0	0	0	0	0	0	0	0
OTU5011	0	0	0	0	5	0	0	0	0	0	0	0	0	0	7	0	0	0	0	0	0	0	0	0	0	0	0	0	0	0	11	16	0	7	0	0	0	0	0	0	79	0	0	0	0	7	3	0	15
OTU5013	0	0	0	0	9	10	0	0	0	0	0	0	0	0	0	0	6	0	0	0	0	0	0	0	0	0	0	0	12	0	0	0	0	0	0	0	0	0	0	0	0	0	0	0	0	0	0	0	0
OTU5014	0	0	0	0	0	12	6	0	0	0	0	0	0	35	0	0	0	8	15	0	0	0	0	18	0	0	0	0	0	0	0	0	0	0	0	0	0	0	0	14	19	0	0	0	0	10	12	0	23
OTU5017	0	0	0	0	0	0	0	11	0	0	0	0	0	0	0	0	0	0	0	0	0	0	0	0	0	18	0	0	13	32	0	0	40	0	0	0	0	0	0	0	0	0	0	16	0	0	0	0	0
OTU502	39	0	17	0	0	0	0	0	115	126	0	0	0	0	0	0	0	0	0	0	0	0	16	0	0	0	385	43	0	0	0	18	135	0	0	0	0	0	0	0	0	7	0	0	0	0	0	0	0
OTU5019	0	0	0	0	14	0	0	0	0	0	0	21	0	34	0	0	0	11	0	8	0	14	0	14	18	0	0	0	0	0	0	21	0	19	0	22	0	0	0	8	0	0	0	0	0	0	0	11	13
OTU5026	0	0	0	0	0	13	0	0	0	0	0	0	0	0	0	234	0	0	0	0	0	0	0	0	0	0	0	0	0	0	0	0	0	0	0	0	0	0	0	0	0	0	0	0	0	0	0	0	0
OTU5030	17	0	19	0	0	0	0	0	9	16	0	0	0	0	0	0	0	0	0	0	0	0	0	0	0	10	8	37	0	0	7	14	0	0	24	0	0	0	0	0	0	0	0	0	10	0	0	0	0
OTU5036	0	0	0	0	0	0	0	0	0	0	49	0	0	0	0	0	0	0	0	0	0	0	0	0	0	0	0	0	0	0	0	0	0	0	0	0	0	0	0	0	0	0	0	58	184	0	0	0	0
OTU5037	0	0	0	0	0	0	0	0	0	0	0	0	0	0	0	0	0	0	0	0	0	0	0	0	0	0	0	0	0	0	0	0	0	0	0	0	0	0	0	0	0	0	0	0	0	0	0	0	0
OTU5045	0	9	0	0	76	0	0	0	0	0	0	9	10	0	0	0	0	0	0	0	0	0	0	0	0	0	0	0	5	0	22	8	0	0	0	0	0	0	0	5	0	0	0	0	0	15	7	0	0
OTU5048	0	0	0	9	0	0	0	16	24	0	0	0	0	0	0	0	0	0	0	0	0	0	0	0	0	0	0	0	0	0	0	0	0	0	0	0	0	0	0	0	0	0	0	0	0	0	0	0	0
OTU5056	0	0	0	18	0	0	0	0	0	0	0	0	0	0	0	0	0	0	5	0	0	0	0	0	0	0	0	0	0	0	0	0	5	0	17	0	13	0	14	0	0	0	11	0	0	0	0	0	0
OTU5059	0	0	0	0	0	14	0	0	0	0	0	0	0	0	0	0	0	0	0	0	0	24	0	0	19	0	0	0	0	0	0	0	0	0	0	0	0	0	0	0	0	0	0	0	0	0	15	0	14
OTU5061	0	0	0	0	0	0	0	0	0	17	0	0	0	0	0	0	0	0	0	0	0	0	0	0	0	0	0	0	0	0	0	0	0	0	0	0	0	0	0	0	0	0	0	0	0	0	0	0	0
OTU5062	10	0	0	0	36	0	0	0	0	0	0	0	20	22	0	33	0	21	0	0	0	38	0	0	0	0	0	0	0	0	0	34	0	0	0	26	0	35	0	0	46	0	0	0	0	0	25	30	0
OTU5065	0	0	0	0	14	0	0	0	0	0	0	11	0	0	20	0	0	11	0	0	0	0	0	14	0	0	0	0	0	0	11	14	0	0	0	0	0	0	0	0	12	0	0	0	0	0	0	41	0
OTU5070	0	0	0	0	16	0	0	0	0	0	0	0	0	0	0	0	18	0	0	0	0	0	0	0	0	0	0	0	0	0	0	0	0	0	0	0	0	0	0	0	20	0	0	0	0	0	7	16	0
OTU5071	0	0	0	0	29	21	0	0	0	0	0	0	0	0	0	0	0	0	0	0	0	0	0	0	0	0	0	0	53	0	11	53	0	0	0	0	0	27	0	14	0	0	0	0	0	0	0	0	0
OTU5079	0	0	0	9	0	7	0	0	0	0	0	14	17	11	0	0	0	0	0	0	0	0	0	0	0	6	0	0	14	0	0	0	0	0	0	0	0	0	0	0	0	0	0	0	0	0	0	0	0
OTU5082	0	0	0	0	0	10	0	0	0	0	0	12	0	0	20	13	0	0	0	0	0	0	0	0	0	0	0	0	0	0	0	0	0	0	0	0	0	0	0	0	0	0	0	0	0	0	0	0	0
OTU5086	0	0	0	0	0	0	0	0	0	0	0	0	0	0	0	0	0	0	0	0	0	0	0	0	0	0	0	0	73	0	0	0	0	0	0	0	0	0	0	0	0	0	0	0	0	0	0	0	0
OTU5087	0	0	0	0	15	13	25	0	0	0	0	0	9	0	0	18	25	0	0	0	0	0	0	0	0	0	0	0	23	0	0	38	0	25	0	14	0	0	0	9	27	0	0	0	0	0	0	0	0
OTU509	0	0	0	0	0	0	0	0	0	0	0	21	30	43	26	0	35	0	0	0	0	33	0	0	21	0	0	0	0	0	0	0	0	0	0	0	0	0	0	0	0	0	0	0	0	0	0	0	0
OTU5089	24	0	0	0	0	0	0	0	4	0	0	0	0	0	0	0	0	0	86	0	63	0	15	0	0	18	16	27	0	0	0	39	0	0	0	0	0	0	0	0	0	0	0	0	0	0	0	0	0
OTU5090	0	352	0	9	0	9	0	0	0	0	0	0	0	2	0	0	0	0	0	0	0	0	0	0	0	0	0	0	0	0	0	0	0	0	0	0	0	0	0	0	0	0	0	0	0	0	0	0	0
OTU5091	52	0	49	43	31	4	0	0	0	38	56	0	0	0	0	0	0	0	0	0	0	0	0	0	0	0	0	0	0	0	0	0	0	0	0	0	0	0	0	0	0	0	0	0	0	0	0	0	0
OTU5093	0	0	0	0	0	0	0	0	0	0	0	0	0	0	0	0	0	0	0	0	0	0	0	0	0	0	0	0	0	0	0	51	0	0	0	0	0	0	0	0	0	0	0	0	0	0	0	0	0
OTU5095	23	0	15	11	0	0	0	15	11	23	0	0	0	0	0	0	0	0	8	0	0	0	15	0	0	18	27	16	0	24	0	12	16	0	0	0	0	0	9	0	0	38	0	0	0	0	0	0	0
OTU5099	10	0	0	0	0	0	0	0	0	0	0	0	0	0	0	0	0	0	0	0	0	0	0	0	0	0	0	0	0	0	0	18	0	0	13	0	0	0	0	0	8	0	0	153	0	0	0	0	0
OTU5102	0	0	0	0	0	0	0	6	0	0	0	0	0	0	0	0	0	0	0	0	0	0	0	0	0	0	0	0	0	0	0	0	0	0	0	0	0	0	0	0	0	0	0	0	0	0	0	0	0
OTU5103	0	0	0	0	0	12	0	0	0	0	0	0	0	0	8	0	0	0	0	0	0	0	0	0	0	0	0	0	0	0	0	0	0	0	0	0	0	0	0	0	0	0	0	0	0	0	0	0	0
OTU5104	19	0	19	0	0	0	0	7	6	0	13	0	0	0	0	0	0	0	10	0	4	0	0	0	0	0	21	0	25	60	0	18	33	0	0	0	0	0	0	0	0	0	0	0	0	0	0	0	0
OTU5105	0	0	0	0	0	0	0	0	0	0	0	0	0	0	0	0	0	0	0	0	0	0	0	0	0	0	0	0	0	0	0	0	0	0	0	0	0	0	0	0	0	0	0	0	0	0	0	0	0
OTU5108	0	0	4	7	0	0	0	0	0	0	0	0	0	0	0	0	0	0	0	0	0	0	0	0	0	0	0	0	0	0	0	0	0	0	0	0	0	0	0	0	0	0	0	0	0	0	0	0	0
OTU5110	43	0	0	0	0	0	0	0	0	0	0	0	0	0	0	0	0	0	0	0	0	0	56	0	0	0	0	0	0	0	0	0	0	0	0	0	0	0	0	0	0	0	0	0	0	0	0	0	0
OTU5111	0	0	0	0	0	0	0	37	0	31	0	2	7	6	0	0	12	0	0	0	0	0	0	0	0	0	0	0	0	0	0	0	0	0	0	0	0	0	0	0	0	0	0	0	0	0	0	0	0
OTU5112	3	0	0	24	47	24	0	0	8	0	0	11	0	8	13	46	0	31	0	41	0	0	0	0	16	0	0	0	0	0	0	0	0	0	0	0	0	0	0	0	0	0	0	0	0	0	0	0	0
OTU5113	0	0	0	0	0	33	0	0	0	0	0	0	0	0	0	0	0	0	0	0	0	0	0	0	0	0	0	0	0	0	0	0	0	0	0	0	0	0	0	0	0	0	0	0	0	0	0	0	0
OTU5118	0	0	19	20	0	11	0	0	0	0	0	0	0	0	0	0	0	0	0	0	0	0	0	0	0	0	0	0	0	0	12	25	0	0	0	18	0	11	0	0	0	0	0	0	0	0	0	0	0
OTU512	0	0	0	0	200	65	0	0	0	0	0	47	0	0	44	288	0	0	0	0	0	0	0	0	0	0	0	0	0	0	0	0	0	0	0	0	0	0	0	0	0	0	0	0	0	0	0	0	0
OTU5120	0	12	0	0	0	0	19	0	0	0	0	0	0	0	0	29	0	13	0	0	0	0	0	0	0	0	0	0	32	0	0	0	0	0	0	0	0	0	0	0	0	0	0	0	0	0	0	0	0
OTU5128	0	0	0	0	0	0	0	0	0	0	0	6	0	0	0	0	4	0	8	0	10	0	0	0	0	8	0	0	6	0	0	0	0	13	0	5	0	3	0	0	0	0	0	0	0	0	0	0	0
OTU5129	0	6	0	0	10	0	9	0	0	0	0	0	0	0	0	0	15	0	0	0	0	0	0	0	0	0	0	0	22	0	12	12	0	9	0	14	0	0	0	0	39	0	0	0	0	0	0	0	0
OTU5130	0	0	0	0	0	0	0	0	0	0	0	0	0	0	0	0	0	0	0	0	0	0	0	0	0	0	0	0	0	0	0	0	0	0	0	0	0	0	0	0	0	0	0	0	0	0	0	0	0
OTU5131	0	0	0	0	0	0	0	0	0	0	0	0	0	0	0	0	0	0	0	0	0	0	0	0	0	0	0	0	0	0	0	0	0	0	0	0	0	0	0	0	0	0	0	0	0	0	0	0	0
OTU5136	0	0	0	0	0	11	0	0	0	0	0	15	15	17	20	0	44	0	0	0	0	0	0	11	12	0	0	0	0	0	9	16	0	36	0	34	0	26	0	22	0	0	0	0	0	0	0	0	0
OTU5137	7	0	4	2	0	0	0	0	0	0	0	0	0	25	0	0	0	0	0	0	0	0	0	0	0	0	0	0	0	0	0	0	0	0	0	0	0	0	0	0	0	0	0	0	0	0	0	0	0
OTU5146	0	0	0	0	41	13	0	0	0	0	0	0	0	0	39	44	0	15	0	5	0	0	0	12	0	0	0	0	7	0	0	0	0	0	0	0	0	0	0	0	0	0	0	0	0	8	3	8	0
OTU515	63	0	194	56	182	57	0	0	42	38	22	133	148	40	83	82	105	46	0	0	0	56	0	52	151	0	0	0	96	0	0	0	0	0	0	0	0	0	0	0	0	0	0	0	0	0	0	0	0
OTU5153	0	0	0	0	0	0	0	0	0	0	0	0	0	0	0	14	0	35	0	19	0	0	0	0	0	0	0	0	0	0	0	0	0	0	0	0	0	0	0	0	6	0	0	0	0	4	0	0	0
OTU5158	0	0	0	32	0	0	0	0	0	0	0	0	0	0	0	0	0	0	0	0	0	0	0	0	0	0	0	0	0	0	0	0	0	0	0	0	0	0	0	0	0	0	0	0	0	0	0	0	0
OTU5161	0	0	69	36	0	6	0	0	0	0	0	0	0	0	0	0	0	0	0	0	0	0	0	0	0	0	0	0	0	0	0	0	0	0	0	0	0	0	0	0	0	0	0	0	0	0	0	0	0
OTU5168	0	0	0	0	0	0	0	0	0	0	0	0	0	0	0	0	0	0	0	0	0	0	0	0	0	8	0	0	0	0	0	0	0	10	0	0	0	0	0	10	0	0	0	0	0	0	8	0	0
OTU5173	0	0	0	8	0	0	0	0	0	0	0	0	0	0	0	0	0	0	0	0	0	0	0	0	0	0	0	0	0	0	0	0	0	0	0	0	0	0	0	0	0	0	0	0	0	0	0	0	0
OTU5174	0	0	0	54	0	0	0	14	33	0	0	0	0	0	0	0	0	0	0	0	0	0	0	0	0	0	0	0	0	0	0	0	0	0	0	0	0	0	0	0	0	0	0	0	0	0	0	0	0
OTU518	31	0	13	22	0	0	5	8	6	6	0	0	0	0	0	0	0	0	7	0	0	0	5	0	0	7	0	9	0	15	0	33	7	23	19	12	15	8	8	3	3	18	7	83	192	3	0	8	0
OTU5185	0	0	0	0	0	0	0	0	0	0	0	0	0	0	0	0	0	0	0	0	0	0	0	0	0	0	0	0	10	0	0	11	0	0	0	0	0	0	0	0	6	0	0	0	0	7	0	27	4
OTU5188	0	0	0	0	0	0	0	0	0	0	0	0	0	0	0	0	0	0	0	0	0	12	0	0	0	0	0	0	30	0	18	0	0	0	0	0	0	0	0	0	0	0	0	0	0	22	27	22	0
OTU5189	0	0	0	10	0	0	0	0	0	0	0	0	0	0	0	0	0	0	0	0	0	0	0	0	0	0	0	0	0	0	0	0	0	0	0	0	0	0	0	0	0	0	0	0	0	0	0	0	0
OTU5191	0	0	0	0	9	10	0	0	0	0	0	11	0	0	9	4	10	0	0	0	0	0	0	0	0	0	0	0	0	0	0	0	0	0	0	0	0	0	0	0	0	0	0	0	0	0	0	0	0
OTU5195	10	0	20	0	18	0	0	26	0	0	14	0	0	0	0	0	0	0	0	0	0	0	0	0	0	0	0	0	0	0	0	0	0	0	0	0	0	0	0	0	0	0	0	0	0	0	0	0	0
OTU52	389	0	411	360	0	9	0	428	951	459	1013	0	0	0	0	0	0	8	327	13	211	5	216	21	0	472	820	398	653	323	9	257	630	0	372	0	292	0	345	0	0	342	474	116	227	0	0	0	0
OTU520	28	0	44	51	14	16	24	34	25	19	43	49	29	43	45	38	48	14	27	12	0	26	28	0	0	29	0	30	40	0	15	24	0	32	12	0	15	0	28	19	36	6	10	0	0	16	38	0	29
OTU5199	0	0	0	0	0	0	0	0	0	0	0	36	8	0	0	0	0	0	0	0	4	0	0	0	0	0	0	0	0	0	0	276	0	0	0	4	0	0	0	7	0	0	0	0	0	0	0	0	0
OTU5204	0	0	0	12	0	0	0	0	0	3	0	4	3	9	0	0	9	0	0	0	0	8	0	0	0	0	0	0	3	0	0	0	0	0	0	0	0	0	0	0	0	0	0	0	0	0	0	0	0
OTU5205	0	0	0	11	0	0	0	8	0	0	0	0	0	0	0	0	0	0	0	0	0	0	0	0	0	0	0	0	13	0	0	0	0	0	18	0	15	0	0	0	0	0	0	0	0	0	0	0	0
OTU5207	0	0	2	12	0	0	0	0	0	0	0	0	0	0	0	0	0	0	0	0	0	0	0	0	0	0	0	0	0	0	0	0	0	0	0	0	0	0	0	0	0	0	0	0	0	0	0	0	0
OTU5208	0	0	0	0	0	0	0	0	0	0	0	0	18	35	16	0	57	0	0	0	0	13	0	0	0	0	0	0	0	0	0	0	0	0	0	0	0	20	0	0	21	0	0	0	0	0	0	0	0
OTU521	73	0	128	61	17	0	22	18	12	48	0	0	0	0	0	54	0	0	77	0	97	0	36	12	28	11	30	43	91	25	76	127	69	0	259	45	111	33	48	26	152	7	31	0	9	0	0	49	95
OTU5209	20	0	16	5	0	0	0	6	3	9	2	0	0	0	3	0	0	0	0	0	0	0	0	0	0	0	0	0	0	0	0	0	0	0	0	0	0	0	0	0	0	0	0	0	0	0	0	0	0
OTU5210	0	0	0	10	0	0	0	4	15	2	0	0	0	0	0	0	0	0	0	0	0	0	0	0	0	0	0	0	20	0	0	0	0	0	0	0	0	0	0	0	0	0	0	0	0	0	0	0	0
OTU5213	0	0	0	0	0	0	0	0	0	0	0	0	0	0	0	0	0	0	40	0	47	0	0	0	0	0	0	0	0	0	0	15	0	0	0	0	0	0	19	0	0	0	42	0	0	0	0	0	0
OTU5215	0	0	0	0	0	5	7	0	0	0	0	0	0	0	0	0	0	4	14	0	33	7	9	0	0	0	0	0	0	0	0	16	0	9	8	0	21	0	0	0	21	0	0	0	0	0	0	0	13
OTU5217	0	0	0	0	0	0	0	0	0	0	0	0	0	0	0	8	0	0	0	0	0	0	0	0	0	0	0	0	0	0	0	0	0	0	0	0	0	0	0	0	0	0	0	0	0	0	0	0	0
OTU522	0	0	0	21	0	26	0	43	0	0	0	10	8	14	8	54	67	35	0	21	0	6	0	22	121	0	0	0	31	0	12	100	0	28	0	33	0	17	0	15	70	0	0	0	6	27	16	85	40
OTU5220	0	0	0	0	0	0	0	0	0	0	0	0	0	52	0	0	0	0	0	4	0	9	0	0	0	0	0	0	0	0	0	0	0	0	0	15	0	57	0	11	0	0	0	0	0	0	0	0	0
OTU5224	0	0	0	0	0	0	0	0	0	0	0	0	0	0	13	0	170	0	0	0	0	0	0	14	0	0	0	0	0	0	0	0	0	0	0	0	0	0	0	0	0	0	0	0	0	0	0	0	0
OTU5225	0	0	0	0	19	16	0	0	0	0	0	28	46	15	6	0	21	19	0	20	0	31	0	18	0	0	0	0	0	0	0	0	0	0	0	0	0	0	0	0	0	0	0	0	0	0	0	0	0
OTU5226	0	0	0	0	0	25	0	0	0	0	0	0	0	28	21	23	22	0	0	0	0	0	0	10	0	0	0	0	0	0	0	21	0	9	0	17	18	20	24	0	23	0	0	0	0	0	0	0	0
OTU5227	0	0	0	15	0	0	0	23	40	13	29	0	0	0	0	0	0	0	5	0	0	0	0	0	0	0	16	22	25	0	0	0	14	0	8	0	0	0	0	0	0	0	22	0	0	0	0	0	0
OTU5228	0	0	0	0	0	12	0	0	0	0	0	0	0	0	0	0	0	0	0	0	0	0	0	0	5	0	0	0	0	0	0	0	0	37	0	0	0	0	0	0	33	0	0	0	0	0	0	0	0
OTU523	0	0	0	0	0	0	0	0	120	59	419	0	0	0	0	0	0	0	0	0	0	0	0	0	0	0	0	0	0	0	0	0	0	0	0	0	0	0	0	0	0	0	0	0	0	0	0	0	0
OTU5231	0	0	0	0	0	0	0	0	0	0	0	0	0	0	0	16	0	0	0	0	0	0	0	0	0	0	0	0	63	0	0	0	0	0	0	0	0	0	0	0	0	0	0	0	0	0	0	0	0
OTU5232	0	25	0	0	47	0	0	0	0	0	0	0	0	0	0	0	0	0	0	0	0	0	0	0	0	0	0	0	0	0	0	0	0	0	0	0	0	0	0	0	0	0	0	0	0	21	0	0	0
OTU524	111	0	74	59	13	0	0	0	17	42	21	11	19	93	33	0	54	12	29	0	17	79	15	11	0	0	0	14	27	0	7	29	17	41	29	30	18	81	14	5	0	8	7	0	0	24	49	23	0
OTU5241	0	0	0	0	0	0	0	0	0	0	0	29	39	13	12	0	0	0	0	8	0	0	0	0	0	0	0	0	0	0	0	0	0	0	0	0	0	0	0	10	0	0	0	0	0	0	0	0	0
OTU5242	0	0	0	19	0	0	0	0	0	0	0	0	0	0	0	0	0	0	0	0	0	0	0	0	0	0	0	40	0	0	0	0	0	0	46	0	21	0	0	0	0	0	0	0	0	0	0	0	0
OTU5244	5	0	0	9	0	0	0	0	0	0	0	0	0	0	0	0	0	0	0	0	0	0	7	0	0	17	0	9	0	0	0	16	0	0	0	0	0	14	0	8	0	0	0	0	0	0	0	13	16
OTU5248	34	0	62	22	0	0	0	13	0	42	0	0	0	0	0	0	0	0	0	0	0	0	0	0	0	0	0	0	0	0	0	0	0	0	0	0	0	0	0	0	0	0	0	0	0	0	0	0	0
OTU5250	0	0	0	0	0	0	0	0	0	50	113	0	0	0	0	0	0	0	0	0	0	0	0	0	0	0	0	0	0	0	0	0	0	0	0	0	0	0	0	0	0	0	0	0	0	0	0	0	0
OTU5252	0	0	0	0	13	0	0	0	0	0	0	14	8	0	22	13	3	12	0	12	0	0	0	8	10	0	0	0	8	0	0	8	0	12	0	9	0	7	0	17	4	0	0	0	0	7	0	21	11
OTU5255	0	0	8	17	15	11	0	0	0	0	0	0	0	16	9	18	10	0	0	0	0	0	0	0	0	0	0	0	0	0	0	0	0	0	0	0	0	0	0	0	0	0	0	0	0	0	0	0	0
OTU5258	0	0	0	0	20	16	0	0	0	0	0	0	7	9	26	0	0	0	0	0	0	0	0	0	27	0	0	0	0	0	0	0	0	0	0	0	0	0	0	0	0	0	0	0	0	0	10	62	19
OTU526	0	0	0	0	0	0	0	0	0	0	1451	0	0	0	0	0	0	0	0	0	0	0	0	0	0	0	0	0	102	0	0	0	0	0	0	0	0	0	0	0	0	0	0	0	0	0	0	0	0
OTU5259	0	0	0	0	6	0	0	0	0	0	0	0	0	0	0	0	0	0	0	0	0	0	0	0	0	0	0	0	0	0	0	0	0	0	0	0	0	0	0	0	0	0	0	0	0	0	0	0	0
OTU5260	0	0	0	0	0	0	0	0	0	0	0	0	0	0	0	0	0	0	59	0	60	0	0	0	0	25	0	23	0	0	0	0	0	0	0	0	0	0	0	0	0	0	0	0	0	0	0	0	0
OTU5263	8	0	10	21	0	0	0	7	10	0	0	0	0	0	0	0	0	0	0	0	0	0	0	0	0	0	0	0	0	0	0	0	0	0	0	0	0	0	0	0	0	0	0	0	0	0	0	0	0
OTU5264	0	0	0	0	6	0	0	0	0	0	0	14	12	13	9	12	12	12	0	0	0	0	0	0	11	0	0	0	22	0	0	27	0	11	0	6	0	0	0	0	0	0	0	0	0	12	0	23	0
OTU5268	0	0	0	0	29	39	0	0	0	0	0	6	19	0	17	0	18	0	0	0	0	0	0	0	25	0	0	0	0	0	0	47	0	0	0	33	0	0	0	0	0	0	0	0	0	25	0	32	0
OTU5270	0	0	0	0	6	14	0	0	0	0	0	37	53	63	14	26	34	32	0	0	0	26	0	0	0	0	0	0	0	0	0	0	0	0	0	0	0	0	0	0	0	0	0	0	0	0	0	0	0
OTU5272	0	0	0	0	42	0	0	0	0	0	0	5	6	13	3	0	0	52	0	36	0	0	0	10	0	0	0	0	7	0	6	0	0	10	0	10	0	9	0	3	0	0	0	0	0	8	0	0	0
OTU5275	0	0	15	0	0	0	0	0	0	0	0	0	25	0	0	0	0	0	0	0	0	0	0	0	0	0	0	0	0	0	0	0	0	0	0	0	0	0	0	0	0	0	0	43	102	0	0	0	0
OTU5280	0	0	6	25	0	0	0	0	0	0	0	0	0	0	0	0	0	0	0	0	0	0	0	0	0	0	0	0	0	0	0	0	0	0	0	0	0	0	0	0	0	0	0	0	0	0	0	0	0
OTU5283	20	0	15	27	0	0	0	0	0	0	0	0	0	0	0	0	0	0	0	0	0	0	0	0	0	0	0	0	0	0	0	0	0	0	0	0	0	0	0	0	0	0	0	0	0	0	0	0	0
OTU529	79	0	94	50	0	0	0	45	21	31	0	0	0	0	0	0	0	0	0	0	26	0	0	0	0	108	0	36	0	0	0	78	0	0	376	0	264	0	167	0	0	0	110	0	0	0	0	0	0
OTU5291	0	0	0	0	0	0	0	0	0	0	0	0	0	0	0	0	0	0	0	0	0	11	0	0	0	0	0	0	0	0	0	14	0	0	0	0	0	23	0	8	26	0	0	0	0	0	0	24	0
OTU5293	0	0	0	0	0	0	0	0	0	0	0	0	0	0	0	0	0	6	0	0	0	0	0	0	0	0	0	0	0	0	0	13	0	0	0	0	0	0	0	0	0	0	0	0	0	0	0	0	0
OTU5295	0	0	0	0	10	15	0	0	0	0	0	0	0	0	14	31	0	0	0	0	0	0	0	0	0	0	0	0	15	0	10	0	0	0	0	8	0	0	0	0	0	0	0	0	0	0	0	0	18
OTU53	120	0	87	67	2	0	0	106	107	112	17	0	3	5	0	0	0	0	85	0	80	0	56	18	0	223	596	214	1330	808	8	459	205	0	0	0	0	0	0	0	0	0	0	84	0	0	0	0	0
OTU5300	0	0	0	0	0	0	0	0	0	0	0	0	0	0	0	0	0	0	0	0	0	0	0	0	0	0	0	0	0	0	0	0	0	0	0	0	0	0	0	0	0	0	0	0	0	0	0	0	0
OTU5304	0	0	0	0	0	0	0	0	0	0	0	21	26	12	0	41	0	15	0	0	0	0	0	15	36	0	0	0	0	0	0	0	0	0	0	0	0	0	0	0	0	0	0	0	0	0	0	0	0
OTU5305	0	0	0	0	0	0	0	0	0	0	0	0	0	0	0	0	0	0	0	0	0	0	0	0	0	0	0	0	0	0	7	10	0	0	14	0	6	0	0	0	0	0	0	0	0	0	0	10	4
OTU5307	0	0	0	0	0	0	0	0	0	0	0	0	0	0	0	0	0	0	0	0	0	0	0	0	0	0	0	0	8	0	0	0	0	0	0	13	0	0	0	0	0	0	0	0	0	0	0	15	0
OTU5310	0	4	0	0	0	16	0	0	0	0	0	0	0	4	17	0	0	0	0	0	0	0	0	0	0	0	0	0	0	0	0	0	0	0	0	0	0	0	0	0	0	0	0	0	0	0	0	0	0
OTU5311	29	0	43	44	0	0	0	0	11	0	0	0	0	0	0	0	0	0	0	0	0	0	0	0	0	0	0	0	0	0	0	0	0	0	33	0	0	0	0	0	0	0	0	0	0	0	0	0	0
OTU5318	0	0	0	0	0	0	0	0	0	0	0	29	0	0	0	0	0	0	0	0	0	0	0	0	0	0	0	0	0	0	0	0	0	20	0	0	0	0	0	0	0	0	0	0	0	28	0	40	0
OTU5320	0	0	0	0	0	0	0	0	0	5	0	0	0	0	0	0	0	0	0	0	0	0	0	0	0	0	0	0	0	10	0	0	0	0	0	0	4	0	0	0	0	0	0	0	0	0	0	0	0
OTU5324	0	0	0	0	0	0	0	0	0	0	0	19	0	0	0	0	23	0	15	0	0	0	0	0	0	0	0	0	0	138	0	22	0	0	0	0	0	0	0	0	0	0	0	0	0	39	4	0	0
OTU5325	0	0	13	12	0	0	0	0	0	0	0	0	0	0	0	0	0	0	0	0	0	24	0	0	9	0	0	0	0	0	0	0	0	0	0	0	0	0	0	0	0	0	0	0	0	0	0	0	0
OTU5327	0	0	0	0	0	0	0	7	7	0	0	0	0	0	0	0	0	0	0	0	0	0	0	0	0	0	28	6	0	16	0	10	0	0	9	0	0	0	27	0	0	19	30	4	0	0	0	0	0
OTU5328	0	0	0	0	0	0	0	0	0	0	0	13	14	34	9	0	21	13	0	20	0	7	0	0	32	0	0	0	0	0	0	0	0	0	0	0	0	0	0	0	0	0	0	0	0	0	0	15	0
OTU5329	0	0	0	0	0	0	0	0	0	0	0	0	0	11	0	0	0	0	0	0	0	0	0	0	0	0	0	0	0	0	9	13	0	0	0	0	0	0	0	0	0	0	0	0	0	0	0	4	6
OTU5335	0	0	0	0	10	0	0	0	0	0	0	0	0	12	0	0	20	0	0	0	0	0	0	0	0	0	0	0	0	0	0	0	0	0	0	0	0	0	0	0	0	0	0	0	0	0	0	0	0
OTU5337	0	0	0	0	0	0	0	0	0	0	0	9	9	37	0	0	28	13	0	21	0	0	0	7	0	0	0	0	0	0	0	0	0	0	0	0	0	0	0	0	0	0	0	0	0	0	0	0	0
OTU5338	0	0	0	0	0	0	0	0	0	0	0	0	0	0	0	0	0	0	0	0	0	0	0	0	0	0	0	0	0	0	0	0	0	0	0	0	0	0	0	0	0	0	0	0	0	0	0	0	0
OTU5341	32	0	29	21	0	0	0	9	9	6	0	0	0	0	0	0	0	0	0	0	0	0	0	0	0	0	0	0	0	0	0	0	0	0	0	0	0	0	0	0	0	0	0	0	0	0	0	0	0
OTU5342	27	0	25	12	0	0	0	0	0	0	0	0	0	0	0	0	0	0	0	0	0	0	0	0	0	0	0	0	0	0	0	0	0	0	0	0	0	0	0	0	0	0	0	0	0	0	0	0	0
OTU5344	17	0	34	26	0	0	0	0	0	0	0	0	0	0	0	0	0	0	0	0	0	0	0	0	0	0	0	0	0	0	0	0	0	0	0	0	0	0	0	0	0	0	0	0	0	0	0	0	0
OTU5345	0	0	0	0	0	0	124	0	0	0	0	0	0	0	0	0	0	0	0	0	0	0	0	0	0	0	0	0	0	0	0	16	0	0	0	0	0	0	0	0	88	0	0	0	0	0	0	0	0
OTU5346	0	0	21	10	0	0	0	0	0	0	0	0	0	0	15	0	0	0	12	0	15	0	0	0	0	0	0	0	0	0	0	0	0	0	12	0	9	0	0	0	0	0	0	0	0	0	0	19	0
OTU5348	14	0	0	0	0	0	0	10	0	0	0	0	0	0	0	0	0	0	19	0	11	0	0	0	0	0	0	0	0	0	0	0	0	9	0	0	0	0	0	0	0	0	0	0	0	0	0	0	0
OTU535	43	0	34	58	31	54	0	46	0	40	70	81	72	77	0	0	0	0	0	45	56	61	40	0	91	58	36	48	35	0	51	104	61	0	116	0	61	0	40	0	0	51	62	0	0	0	0	0	0
OTU5349	0	0	0	0	0	0	0	0	0	0	0	8	0	0	0	35	0	11	0	0	0	0	0	0	0	0	0	0	0	0	0	0	0	0	0	0	0	0	0	0	0	0	0	0	0	0	0	0	0
OTU5350	0	2	0	0	5	0	0	0	0	0	0	5	6	0	21	34	57	9	0	0	0	6	0	0	6	0	0	0	0	0	6	12	0	0	0	0	0	0	0	14	37	0	0	0	0	0	0	0	0
OTU5353	0	0	0	0	0	0	0	0	0	0	0	0	0	0	0	0	0	31	0	0	0	23	0	0	0	0	0	0	0	0	0	0	0	0	0	0	0	0	0	0	0	0	0	0	0	9	0	0	0
OTU5357	0	0	0	0	0	0	0	0	0	0	0	0	0	0	0	0	0	0	0	0	0	0	0	0	0	0	0	0	0	0	0	0	0	0	0	0	0	0	0	0	0	0	0	0	0	0	0	0	0
OTU5359	0	0	0	0	24	0	0	0	0	0	0	0	0	0	0	0	12	0	0	0	0	0	0	0	0	0	0	0	0	0	0	0	0	0	0	0	0	0	0	0	0	0	0	0	0	0	0	0	0
OTU5361	0	0	0	0	24	0	0	0	0	0	0	0	0	0	0	0	0	0	0	0	0	0	0	0	0	0	0	0	33	0	0	0	0	0	0	0	0	0	0	0	0	0	0	0	0	0	0	0	0
OTU5362	0	0	0	0	15	0	14	0	0	0	0	0	0	0	0	0	0	0	0	0	0	0	0	0	0	0	0	0	30	0	14	0	0	0	0	0	0	0	0	0	0	0	0	0	0	0	0	12	13
OTU5364	0	0	0	0	0	0	0	0	0	0	0	0	0	0	0	0	6	0	0	0	0	0	5	0	0	0	4	10	0	0	0	13	7	0	0	0	0	0	0	0	0	0	0	0	0	0	0	0	0
OTU5365	0	7	0	0	18	30	6	0	0	0	0	0	0	0	0	0	0	3	0	0	0	0	0	2	0	0	0	0	20	0	19	39	0	35	0	17	0	7	0	23	34	0	0	0	0	0	0	4	0
OTU5366	0	0	0	0	32	25	13	0	0	0	0	10	0	0	0	0	0	0	0	0	0	0	0	0	22	0	0	0	0	0	0	0	0	0	45	0	37	0	0	28	0	0	16	0	0	0	0	0	0
OTU5367	0	0	0	0	0	0	0	0	0	0	0	0	0	0	0	0	0	0	0	0	0	0	0	0	0	0	0	0	0	0	0	0	0	0	0	0	0	0	0	0	0	0	0	0	0	0	0	0	0
OTU5369	64	0	28	12	9	0	0	0	6	14	0	0	0	0	0	0	0	0	0	0	0	0	0	0	0	0	0	0	0	0	0	0	0	0	0	0	0	0	0	0	0	0	0	0	0	0	0	0	0
OTU5370	0	0	0	0	10	7	0	0	0	0	0	10	20	38	12	8	0	0	0	0	0	0	0	0	0	0	0	0	0	0	0	0	0	0	0	0	0	0	0	0	0	0	0	0	0	0	0	0	0
OTU5377	24	0	14	25	0	0	0	9	8	17	7	0	0	0	0	0	0	0	0	0	0	0	0	0	0	0	0	0	0	0	0	0	0	0	0	0	0	0	0	0	0	0	0	0	0	0	0	0	0
OTU5378	0	0	0	0	0	0	0	0	0	0	0	0	0	0	0	0	0	6	0	0	0	0	0	0	0	0	0	0	0	0	0	0	0	0	0	0	0	0	0	5	0	0	0	36	19	0	0	5	0
OTU5381	0	0	0	0	0	0	0	0	0	0	0	29	25	278	8	0	0	0	0	0	0	0	0	0	0	0	0	0	0	0	0	0	0	0	0	0	0	0	0	0	0	0	0	0	0	0	0	0	0
OTU5394	0	0	0	0	0	0	0	0	0	0	0	0	0	0	0	0	0	0	0	0	0	0	8	0	0	9	19	8	0	0	0	0	14	0	0	0	0	0	0	0	0	4	0	0	0	0	0	0	0
OTU5396	0	0	0	0	0	0	0	0	0	0	0	0	16	41	0	0	0	0	0	0	0	0	0	0	0	0	0	0	0	0	0	0	0	0	0	0	0	27	0	0	0	0	0	0	0	25	0	16	0
OTU54	24	0	0	0	0	0	0	0	66	45	1799	0	0	9	0	0	0	0	41	0	9	0	25	0	0	170	0	0	364	0	0	0	0	0	0	0	0	0	0	0	0	0	0	0	0	0	0	0	0
OTU5399	0	0	0	0	0	0	0	0	0	0	0	0	0	0	0	0	33	0	0	0	0	87	0	0	0	0	0	0	28	0	0	0	0	0	0	0	0	0	0	0	0	0	0	0	0	0	0	0	0
OTU5401	0	0	0	0	0	0	0	0	0	0	0	28	21	0	25	0	0	0	0	0	0	0	0	0	0	0	0	0	40	0	0	0	0	0	0	0	0	0	0	0	0	0	0	0	0	23	0	0	0
OTU5407	10	0	0	11	6	0	0	0	0	0	0	15	20	0	5	0	14	7	0	6	0	0	0	9	17	0	0	0	12	0	0	0	0	0	0	0	0	0	0	0	0	0	0	0	0	0	0	0	0
OTU5408	0	0	0	0	0	0	0	0	0	0	0	0	0	0	0	0	16	8	0	0	0	68	0	0	0	0	0	0	0	0	0	0	0	0	0	0	0	0	0	0	0	0	0	0	0	0	0	0	0
OTU5411	0	0	11	42	0	0	0	0	21	0	0	0	0	0	0	0	0	0	0	0	12	0	10	0	0	0	0	0	0	0	0	0	0	0	0	0	0	0	0	0	0	0	0	0	0	0	0	0	0
OTU5415	0	0	0	0	0	0	152	0	0	0	0	0	0	0	0	0	0	0	0	0	0	0	0	0	0	0	0	0	0	0	0	0	0	0	0	0	0	0	0	0	90	0	0	0	0	0	0	0	0
OTU5416	0	0	0	0	0	0	0	0	0	0	0	0	0	0	10	15	0	0	0	0	0	0	0	0	0	0	0	0	49	0	0	0	0	0	0	0	0	0	0	0	0	0	0	0	0	0	0	0	0
OTU5417	0	0	7	0	0	0	0	7	0	0	0	0	0	0	0	0	5	0	6	0	0	0	8	0	0	0	0	0	0	0	0	17	0	11	12	0	12	12	0	6	11	0	0	0	0	0	7	0	0
OTU5425	0	0	0	0	119	0	0	0	75	0	0	0	0	0	0	0	96	0	0	0	0	0	0	0	0	0	0	0	0	0	0	0	0	0	0	0	0	0	0	0	0	0	0	0	0	0	0	0	0
OTU5429	0	0	0	0	0	0	0	0	0	0	0	0	0	0	0	0	0	0	0	0	0	0	0	0	0	0	0	0	0	0	0	0	0	0	0	0	0	0	0	0	0	0	0	0	0	0	0	0	0
OTU5431	0	0	0	37	0	0	0	0	23	0	0	0	0	0	0	0	0	0	14	0	0	0	34	0	0	33	13	19	0	0	0	0	0	0	0	0	0	0	0	0	0	0	0	0	0	0	0	0	0
OTU5432	0	0	0	30	0	0	7	0	0	0	0	0	0	18	6	0	0	0	0	0	0	0	0	0	0	0	0	0	0	0	0	14	0	10	0	0	0	10	0	8	0	0	0	0	0	0	9	0	0
OTU5433	51	13	22	14	0	0	0	44	0	0	0	0	0	41	0	0	0	0	0	0	0	0	0	0	0	0	0	0	0	0	0	0	0	0	0	0	0	0	0	0	0	0	0	0	0	0	0	0	0
OTU5434	0	0	36	0	0	0	0	0	0	0	23	0	0	0	0	0	0	0	53	0	0	0	0	0	0	0	0	0	0	0	0	0	0	0	0	0	0	0	0	0	0	0	0	0	0	0	0	0	0
OTU5435	0	0	0	0	0	0	0	0	0	0	0	0	0	0	53	18	0	0	0	0	0	0	0	0	0	0	0	0	0	0	0	0	0	0	0	0	0	0	0	0	0	0	0	0	0	0	0	0	0
OTU5436	0	0	0	0	13	28	0	0	0	0	0	0	0	0	0	0	0	0	0	0	0	0	0	0	0	0	0	0	0	0	0	0	0	0	0	0	0	0	0	0	0	0	0	0	0	0	0	0	0
OTU5439	0	0	0	0	0	0	0	0	0	0	0	0	0	0	0	0	36	0	0	0	0	0	0	0	0	0	0	0	10	0	0	0	0	0	0	0	0	0	0	0	0	0	0	0	0	0	0	0	11
OTU5451	0	0	0	0	6	0	0	0	0	0	0	4	3	0	20	0	0	0	0	0	0	0	0	6	12	0	0	0	0	0	0	0	0	0	0	0	0	0	0	0	0	0	0	0	0	0	0	0	0
OTU5454	0	0	0	0	13	15	0	0	0	0	0	0	0	0	0	0	0	0	0	0	0	0	0	0	0	0	0	0	0	0	13	0	0	0	0	0	0	0	0	0	0	0	0	0	0	0	0	26	0
OTU546	0	0	0	0	0	0	0	124	0	0	48	0	0	0	0	0	0	0	46	0	21	0	78	0	0	0	0	0	0	0	0	0	0	0	0	0	0	0	0	0	0	0	0	0	0	0	0	0	0
OTU5459	0	0	0	8	0	0	0	0	0	4	0	0	0	0	0	0	0	0	7	0	0	0	7	0	0	14	0	0	0	0	0	0	0	0	0	0	0	0	0	0	0	0	0	0	0	0	0	0	0
OTU5460	0	0	0	0	0	0	0	0	0	0	0	0	0	0	34	0	0	24	0	10	0	17	0	20	44	0	0	0	8	0	0	0	0	0	0	0	0	0	0	0	0	0	0	0	0	0	0	0	0
OTU5461	28	0	33	17	0	0	0	0	0	14	0	0	0	0	0	0	5	0	0	0	0	0	0	0	0	0	0	0	0	0	0	0	0	0	0	0	0	0	0	0	0	0	0	0	0	0	0	0	0
OTU5463	9	0	11	16	0	0	0	0	0	0	0	0	0	0	0	0	0	0	0	0	0	6	0	0	0	0	0	0	5	0	0	0	0	0	0	0	0	0	0	0	0	0	0	0	0	0	0	0	0
OTU5464	0	0	0	25	30	0	0	0	0	0	0	0	0	0	17	35	0	0	0	0	0	0	0	0	0	0	0	0	0	0	0	0	0	0	0	0	0	0	0	0	0	0	0	0	0	0	0	0	0
OTU5466	0	0	0	0	17	0	25	0	0	0	0	6	0	0	24	37	0	0	0	0	0	0	0	0	0	0	0	0	0	0	14	6	0	6	0	16	0	0	0	8	49	0	0	0	0	19	0	0	0
OTU5467	0	0	8	0	0	0	0	0	0	0	0	0	0	0	0	0	0	0	0	0	0	0	0	0	0	0	0	0	0	0	0	0	0	0	0	0	0	0	0	0	0	0	0	0	0	0	0	0	0
OTU5469	0	0	0	0	26	30	0	0	0	0	0	0	0	0	41	40	0	0	0	0	0	0	0	0	0	0	0	0	0	0	0	0	0	0	0	0	0	0	0	0	0	0	0	0	0	0	0	0	0
OTU5470	0	0	0	0	0	0	0	0	0	0	0	14	0	0	63	23	53	0	0	0	0	0	0	20	13	0	0	0	0	0	0	0	0	0	0	0	0	0	0	0	0	0	0	0	0	0	0	0	0
OTU5473	0	0	0	0	0	0	0	0	0	0	0	25	43	53	0	0	33	0	0	0	0	0	0	0	0	0	0	0	0	0	0	0	0	0	0	0	0	0	0	0	0	0	0	0	0	0	0	0	0
OTU5474	0	0	0	0	0	0	0	0	0	0	0	0	0	0	0	0	0	0	0	0	0	0	0	0	0	0	0	0	0	0	0	0	0	23	0	15	0	0	0	33	0	0	0	0	0	0	0	0	0
OTU5476	0	0	15	30	0	0	0	0	0	0	0	0	0	0	0	0	0	0	0	0	0	0	0	0	0	0	0	0	0	0	0	0	0	0	0	0	0	0	0	0	0	0	0	0	0	0	0	0	0
OTU5477	0	0	0	0	0	0	136	0	0	0	0	0	0	0	0	0	0	0	0	0	0	0	0	0	0	0	0	0	0	0	0	0	0	0	0	0	0	0	0	0	88	0	0	0	0	0	0	0	0
OTU5481	0	0	0	0	0	0	0	0	0	0	0	0	0	0	0	0	0	0	0	0	0	0	7	0	0	0	8	0	0	13	0	12	5	0	0	0	0	0	0	0	0	0	0	0	0	0	0	0	0
OTU5485	0	0	0	0	0	0	0	0	0	0	0	0	0	0	0	0	0	0	0	0	0	0	0	0	0	0	0	0	0	0	0	34	0	23	0	0	0	40	0	18	0	0	0	0	0	0	0	0	20
OTU5488	0	0	0	0	0	0	0	0	0	0	0	0	0	0	0	0	0	0	19	0	39	0	16	0	0	14	0	14	0	0	16	25	0	0	0	0	0	0	0	0	0	0	0	0	0	27	0	12	0
OTU549	0	377	0	0	0	0	0	0	0	0	0	0	0	0	0	0	0	0	0	0	0	0	0	0	0	0	0	0	0	0	0	0	0	0	0	0	0	0	0	0	0	0	0	0	0	0	0	0	0
OTU5489	0	0	0	0	14	0	0	0	0	0	0	0	0	0	0	0	0	0	0	0	0	0	0	0	0	0	0	0	14	0	0	13	0	22	0	26	0	8	0	10	17	0	0	0	0	15	0	17	7
OTU5490	0	0	0	0	7	6	10	0	0	0	0	9	0	9	0	11	0	0	0	0	0	0	0	0	11	0	0	0	18	0	0	17	0	10	0	15	0	13	0	10	14	0	0	0	0	0	0	0	0
OTU5491	16	0	18	0	20	0	0	0	0	0	0	0	0	12	0	0	29	0	0	0	0	0	0	0	0	0	0	0	0	0	0	19	0	26	0	0	0	13	0	14	37	0	0	0	0	0	0	47	0
OTU5494	0	0	0	0	5	8	2	0	0	0	0	4	0	0	5	0	0	0	0	0	0	0	0	0	0	0	0	0	13	0	4	5	0	0	0	4	0	0	0	2	6	0	0	0	0	0	3	26	0
OTU5497	0	0	0	0	0	0	0	0	0	0	0	14	0	0	0	0	0	0	0	0	0	0	0	0	0	0	0	0	18	0	8	0	0	0	0	0	0	0	0	0	0	0	0	0	0	0	0	0	0
OTU55	360	3	88	13	0	0	0	923	292	16	577	0	7	8	0	0	0	0	86	7	23	0	0	0	0	368	0	0	0	0	0	0	0	0	0	0	0	0	0	0	0	0	0	0	0	0	0	0	0
OTU550	51	0	9	24	0	0	0	32	100	10	208	0	0	0	0	0	0	0	18	2	0	683	59	4	3	31	9	26	497	7	0	16	48	0	0	0	11	0	25	0	0	5	20	0	111	0	0	0	0
OTU5505	3	0	17	14	8	5	0	0	0	0	0	0	0	0	0	0	0	0	0	0	0	0	0	0	0	0	0	0	0	0	0	0	0	0	0	0	0	0	0	0	0	0	0	0	0	0	0	0	0
OTU5508	0	0	0	0	31	0	0	0	0	0	0	30	44	32	0	36	20	0	0	0	0	8	0	0	0	0	0	0	0	0	0	0	0	0	0	0	0	0	0	0	31	0	0	0	0	0	0	32	21
OTU5510	0	0	0	0	15	8	0	0	0	0	0	0	0	0	0	0	0	0	0	0	0	0	0	0	0	0	0	0	0	0	0	0	0	0	0	0	0	0	0	0	0	0	0	0	0	0	0	0	0
OTU5511	0	0	0	0	0	0	0	0	0	0	0	0	0	0	0	0	0	0	0	0	0	0	0	19	0	0	0	0	0	0	0	0	0	0	0	0	0	0	0	0	0	0	0	0	0	0	0	0	0
OTU5512	0	3	0	0	11	4	0	0	0	0	0	0	0	0	0	0	0	0	0	0	0	0	0	0	0	0	0	0	0	0	0	0	0	0	0	0	0	0	0	0	0	0	0	0	0	0	0	0	0
OTU5513	0	0	0	0	0	10	0	0	0	0	0	0	10	14	10	0	0	0	0	0	0	11	0	16	7	0	0	0	0	0	0	0	0	9	0	8	0	0	0	9	0	0	0	0	0	3	3	11	3
OTU5516	0	0	0	0	7	3	0	0	0	0	0	0	0	4	0	4	0	4	0	5	0	0	0	14	13	0	0	0	19	0	0	0	0	0	0	0	0	0	0	0	0	0	0	0	0	0	0	0	0
OTU5518	15	0	16	9	0	0	0	0	21	21	0	0	0	0	0	0	0	0	8	0	0	0	0	0	0	30	16	11	0	44	0	12	10	0	8	0	8	0	12	0	0	4	7	39	36	0	0	0	0
OTU5519	20	0	0	26	0	0	0	0	0	0	0	0	0	0	0	0	0	0	0	0	0	0	0	0	0	0	0	0	0	0	0	0	0	0	0	0	0	0	0	0	0	0	0	0	0	0	0	0	0
OTU5521	0	0	0	0	7	11	0	0	0	0	0	0	0	10	9	0	70	5	0	0	0	7	0	6	0	0	0	0	23	0	0	19	0	6	0	8	0	0	0	12	0	0	0	0	0	0	0	0	0
OTU5523	26	0	36	27	0	0	0	32	0	0	0	0	0	0	0	0	0	0	0	0	0	0	0	0	0	0	0	0	0	0	0	0	0	0	0	0	0	0	0	0	0	0	0	0	0	0	0	0	0
OTU5526	0	0	0	0	0	0	0	0	0	0	0	0	0	0	0	0	5	0	0	0	3	0	2	0	0	0	3	0	0	0	0	0	0	0	0	0	0	0	0	0	0	0	0	0	0	0	0	0	0
OTU5530	0	0	0	0	0	0	0	0	0	0	0	0	0	0	0	0	0	0	0	0	0	0	0	0	0	0	0	0	51	2	0	0	0	109	0	81	0	0	0	54	0	0	0	0	0	0	0	0	0
OTU5531	0	0	0	0	4	0	0	0	0	0	0	0	0	0	36	36	0	0	0	0	0	0	0	0	0	0	0	0	0	0	0	0	0	0	0	0	0	0	0	0	0	0	0	0	0	0	0	0	0
OTU5535	18	0	0	0	0	0	0	0	0	0	15	0	0	0	0	0	0	0	0	0	21	0	5	0	0	5	7	22	0	9	0	2	3	0	4	0	7	0	0	0	0	0	0	0	0	0	0	0	0
OTU5538	0	0	0	0	0	0	0	0	0	0	0	29	0	274	0	0	0	0	0	0	0	0	0	0	0	0	0	0	0	0	0	0	0	0	0	0	0	0	0	0	0	0	0	0	0	0	0	0	0
OTU554	35	19	19	29	7	6	0	46	0	0	788	0	0	0	0	0	0	0	0	0	0	0	0	0	0	0	0	0	0	0	0	0	0	0	0	0	0	0	0	0	0	0	0	0	0	0	0	0	0
OTU5544	0	18	0	0	0	0	0	0	0	0	0	0	0	0	0	0	0	0	0	0	0	0	0	0	0	0	0	0	0	0	0	0	0	0	0	0	0	0	0	0	0	0	0	0	0	0	0	0	0
OTU5553	0	0	0	0	0	18	0	0	0	0	0	0	0	0	0	0	37	0	0	0	0	0	0	9	0	0	0	0	25	0	0	0	0	35	0	20	0	19	0	0	0	0	0	0	0	0	0	0	0
OTU5556	0	0	0	0	0	0	0	0	0	0	0	0	0	9	29	0	8	0	0	0	0	0	0	0	0	0	0	0	0	0	0	11	0	21	0	23	0	46	0	25	0	0	0	0	0	0	0	0	0
OTU5558	0	0	0	0	0	0	0	0	0	0	0	0	0	0	0	0	0	0	0	7	0	0	0	0	0	0	0	0	0	40	0	0	100	0	0	0	0	0	0	0	0	0	0	0	0	0	0	0	0
OTU5559	0	0	0	0	0	0	0	0	0	0	0	31	25	34	0	0	39	0	0	0	0	0	0	0	0	0	0	0	0	0	0	0	0	0	0	0	0	16	0	0	0	0	0	0	0	0	0	35	0
OTU5561	0	0	0	0	0	0	0	0	0	0	0	0	0	0	0	0	0	0	0	0	0	0	0	0	0	0	0	0	0	0	0	0	0	0	0	0	0	0	0	0	0	0	0	0	0	0	0	0	0
OTU5562	0	0	0	0	0	0	0	25	0	0	0	0	0	0	0	0	0	0	0	0	0	0	0	0	0	0	0	0	0	0	0	0	0	0	0	0	0	0	0	0	0	0	0	0	0	0	0	0	0
OTU5564	0	0	0	0	0	16	0	0	0	0	0	10	15	10	38	0	7	0	0	0	0	0	0	9	0	0	0	0	0	0	0	15	0	10	0	0	0	0	0	0	0	0	0	0	0	0	0	0	7
OTU5566	0	0	0	0	0	0	0	0	0	0	0	0	31	37	0	0	15	14	0	20	0	5	0	0	46	0	0	0	0	0	17	0	0	0	0	0	0	0	0	12	0	0	0	0	0	0	0	0	0
OTU5568	11	0	33	17	0	0	0	11	4	5	0	0	0	0	0	0	0	0	0	0	0	0	0	0	0	0	0	0	0	0	0	0	0	0	0	0	0	0	0	0	0	0	0	0	0	0	0	0	0
OTU5569	0	0	0	0	0	0	0	0	0	0	0	19	10	13	0	17	9	0	0	0	0	0	0	0	0	0	0	0	0	0	0	0	0	0	0	0	0	0	0	0	0	0	0	0	0	0	0	0	0
OTU5572	17	0	17	0	19	0	0	0	0	0	0	0	0	0	0	0	14	0	0	0	0	0	0	0	0	0	0	0	0	0	0	0	0	0	0	0	0	0	0	0	0	0	0	0	0	0	0	0	0
OTU5573	15	0	22	16	8	0	11	0	0	0	0	0	0	0	0	0	0	0	6	0	0	0	0	0	0	0	0	13	0	0	0	9	0	0	0	0	0	0	8	0	0	0	18	0	0	0	0	8	0
OTU5578	15	0	12	16	0	0	0	12	16	13	8	0	0	0	0	0	0	0	13	0	0	0	0	0	0	0	11	15	0	0	8	17	0	0	0	0	14	0	0	0	0	0	13	0	0	0	0	0	0
OTU5582	0	0	0	0	25	12	4	0	0	0	0	9	20	10	9	0	28	0	0	0	0	0	0	0	0	4	0	0	8	0	3	21	0	12	0	16	0	5	0	8	6	0	0	0	0	13	6	61	4
OTU5587	0	0	0	0	0	0	0	0	0	0	0	15	0	0	0	0	0	0	0	0	0	0	0	22	12	0	0	0	0	0	0	0	0	0	0	0	0	0	0	0	0	0	0	0	0	25	0	0	18
OTU5589	0	0	0	0	0	0	0	0	0	0	0	0	0	0	0	0	0	0	0	0	0	0	0	0	0	0	0	0	0	0	0	0	0	15	0	0	0	0	0	0	0	0	0	0	0	0	0	0	0
OTU5590	0	0	0	19	0	0	0	0	8	7	0	0	0	0	0	0	0	0	0	0	0	0	6	0	0	0	0	8	9	0	0	13	0	0	0	0	0	0	0	0	15	0	0	0	0	0	0	0	0
OTU5600	0	0	0	0	0	0	0	0	0	0	0	0	11	0	0	0	0	0	0	0	0	0	0	0	0	0	0	0	0	0	0	20	0	48	0	38	0	107	0	0	0	0	0	0	0	0	0	0	0
OTU5601	0	0	0	0	0	0	0	0	0	0	0	21	20	0	23	0	8	13	0	6	0	0	0	0	27	0	0	0	7	0	13	16	0	23	0	0	0	0	0	14	0	0	0	0	0	0	0	28	20
OTU5605	0	0	0	0	0	0	4	0	0	0	0	0	0	0	0	0	0	0	0	0	0	0	0	0	0	0	0	0	0	0	7	0	0	0	0	0	0	0	0	5	0	0	0	0	0	0	0	15	2
OTU5606	0	0	0	0	0	0	0	0	0	0	0	0	0	0	0	27	27	0	0	76	0	0	0	0	0	0	0	0	0	0	0	0	0	0	0	0	0	0	0	0	0	0	0	0	0	0	0	0	0
OTU5607	0	0	0	0	0	0	126	0	0	0	0	0	0	0	0	0	0	0	0	0	0	0	0	0	0	0	0	0	0	0	0	0	0	0	0	0	0	0	0	0	9	0	0	0	0	0	0	0	0
OTU5613	0	0	0	0	0	0	0	0	0	0	0	0	0	0	0	0	0	0	0	0	0	0	0	0	0	0	0	0	0	0	0	0	0	0	0	0	0	0	0	0	0	0	0	0	0	0	0	0	0
OTU5615	39	0	44	25	0	0	0	12	0	19	0	0	0	0	0	0	0	0	0	0	0	0	0	0	0	0	0	0	0	0	0	0	0	0	0	0	0	0	38	0	0	0	23	0	0	0	0	0	0
OTU5616	0	239	15	33	0	20	0	0	0	0	0	0	3	0	0	0	0	0	0	9	0	0	0	0	0	0	0	0	0	0	0	0	0	0	0	0	0	0	0	0	0	0	0	0	0	0	0	0	0
OTU5625	0	0	0	0	49	35	0	0	0	0	0	0	0	0	0	0	0	0	0	0	0	0	0	0	0	0	0	0	26	0	21	6	0	0	0	0	0	0	0	0	17	0	0	0	0	0	0	9	15
OTU5638	0	0	0	0	3	0	0	0	0	0	0	0	0	0	0	0	0	0	0	0	0	0	0	0	0	0	0	0	0	0	0	0	0	0	0	0	0	0	0	0	0	0	0	0	0	0	0	0	0
OTU5642	0	0	0	0	0	0	0	0	0	0	0	0	0	0	0	0	0	0	0	0	0	0	0	0	0	0	0	0	0	0	0	0	0	0	0	0	0	0	0	0	0	0	0	0	0	0	0	0	0
OTU5644	0	0	0	0	0	0	0	0	0	0	0	0	0	0	0	0	10	0	0	0	0	0	0	0	0	0	0	0	14	0	0	0	0	0	0	0	0	0	0	0	0	0	0	0	8	0	0	0	11
OTU5648	0	0	0	0	7	0	5	0	0	0	0	0	0	0	0	0	0	0	0	0	0	0	0	0	0	0	0	0	0	0	6	17	0	0	0	0	0	0	0	0	0	0	0	0	0	0	0	18	36
OTU5650	12	0	0	0	0	0	0	5	0	0	0	0	0	0	0	0	0	0	28	0	10	0	0	0	0	0	0	0	0	0	0	0	0	0	0	0	0	0	0	0	0	0	0	0	0	0	0	0	0
OTU5652	0	0	6	0	0	0	0	15	0	0	0	0	0	0	0	0	0	0	0	0	0	0	0	0	0	0	0	0	0	0	0	0	0	0	0	0	34	0	0	9	0	0	6	0	0	0	0	0	0
OTU5660	0	0	0	0	0	0	0	0	0	0	0	0	0	0	0	0	0	17	0	0	0	0	0	0	0	0	0	0	0	0	0	0	0	13	0	0	0	0	0	0	0	0	0	0	0	0	18	0	0
OTU5661	22	0	24	16	0	0	0	0	0	17	0	0	0	0	0	0	0	0	0	0	0	0	0	0	0	0	0	0	0	0	0	0	0	0	0	0	0	0	0	0	0	0	0	0	0	0	0	0	0
OTU5663	49	0	93	31	0	9	0	11	0	19	0	0	0	0	0	0	0	0	0	0	0	0	0	0	0	0	0	0	0	0	0	0	0	0	0	0	0	0	0	0	0	0	0	0	0	0	0	0	0
OTU5664	0	0	0	56	0	0	0	14	0	17	0	0	0	19	0	0	0	0	0	0	0	0	0	0	0	11	0	0	0	0	0	0	0	0	0	0	0	0	0	0	0	0	0	0	0	0	0	0	0
OTU567	0	0	0	0	0	0	0	0	0	0	0	10	0	9	5	0	13	5	0	0	0	0	0	6	9	0	0	0	4	0	6	7	0	6	0	11	0	4	0	4	0	0	0	0	0	0	0	6	0
OTU5671	0	0	0	0	0	0	0	0	0	0	0	0	0	7	0	0	7	0	0	0	0	0	0	0	7	0	0	0	0	0	0	0	0	0	0	0	0	0	0	0	0	0	0	0	0	0	0	0	0
OTU5673	5	3	0	0	0	0	0	0	0	0	0	0	0	0	0	0	0	0	0	0	0	0	0	0	0	18	5	0	0	0	0	8	96	0	0	0	0	0	0	0	0	0	0	0	0	0	0	0	0
OTU5674	0	0	0	15	30	6	0	0	0	0	0	0	0	0	6	0	0	29	0	20	0	17	0	0	0	0	0	0	0	0	0	0	0	0	0	42	0	0	0	0	0	0	0	0	0	8	0	0	0
OTU568	18	0	17	20	0	0	0	4	0	11	0	0	0	0	8	0	16	0	5	0	0	0	8	0	13	0	5	0	13	0	2	0	0	0	0	0	0	0	0	0	0	0	0	0	0	0	0	0	0
OTU5679	28	0	16	19	0	0	0	11	0	18	0	0	0	0	0	0	0	0	20	0	21	0	9	0	0	5	0	10	0	5	0	18	0	0	0	0	0	0	0	0	0	0	0	0	0	0	0	0	0
OTU5686	14	0	22	34	0	0	0	0	0	12	0	0	0	0	0	0	0	0	68	0	53	0	20	0	0	27	0	19	0	0	0	24	0	0	0	0	0	0	0	0	0	0	0	0	0	0	0	0	0
OTU5687	0	0	10	7	0	0	0	0	0	13	0	0	0	0	0	0	0	0	0	0	0	0	0	0	0	11	22	4	212	0	0	5	19	0	0	0	0	0	0	0	0	9	0	0	0	0	0	0	0
OTU569	0	0	0	0	0	0	0	0	0	0	0	0	0	0	0	0	0	0	0	0	0	0	0	0	0	0	0	0	0	0	0	0	0	0	0	0	0	0	0	0	0	0	0	0	0	0	0	0	0
OTU5690	0	0	0	0	0	0	0	37	0	0	0	0	0	0	0	0	0	0	0	0	0	0	0	0	0	0	0	0	0	0	0	0	0	0	0	0	0	0	0	0	0	0	0	0	0	0	0	0	0
OTU5692	0	0	0	0	6	0	0	0	0	0	0	7	22	52	12	0	0	0	0	0	0	0	0	0	12	0	0	0	9	0	0	0	0	0	0	0	0	10	0	11	14	0	0	0	0	0	37	48	8
OTU5701	0	0	0	0	0	0	0	0	0	0	0	0	9	0	25	0	35	0	0	5	0	0	0	0	0	0	0	0	12	0	0	0	0	0	0	0	0	0	0	0	8	0	0	0	0	0	0	0	6
OTU5702	0	0	0	0	0	0	0	0	0	0	0	0	0	0	0	0	0	0	0	0	0	0	0	0	0	0	0	0	0	0	0	0	0	0	0	0	0	0	0	0	0	0	0	0	0	0	0	0	0
OTU5703	0	0	0	0	0	0	0	0	0	0	0	0	0	0	0	0	0	0	0	0	0	0	0	0	0	0	0	0	0	0	0	0	0	0	0	0	0	0	0	0	0	0	0	0	0	0	0	0	0
OTU5704	0	0	0	0	18	0	0	0	0	0	0	0	0	21	17	14	0	0	0	0	0	0	0	0	0	0	0	0	0	0	0	0	0	0	0	0	0	0	0	0	0	0	0	0	0	0	0	0	0
OTU5707	0	18	36	0	11	23	0	0	0	0	0	0	0	0	0	0	0	0	0	0	0	0	0	0	0	0	0	0	0	0	0	0	0	0	0	0	0	0	0	0	0	0	0	0	0	0	0	0	0
OTU5708	0	0	0	14	0	0	0	0	10	0	0	0	0	0	0	0	0	0	0	0	0	0	0	0	0	0	0	0	0	0	0	0	0	0	0	0	0	0	0	0	0	0	0	0	0	0	0	0	0
OTU5709	0	0	0	0	0	0	0	0	0	0	0	14	0	25	35	39	0	0	0	29	0	0	0	64	14	0	0	0	0	0	0	0	0	0	0	0	0	0	0	0	0	0	0	0	0	0	0	0	0
OTU5711	0	0	0	0	0	0	0	0	0	0	0	0	0	0	0	0	0	0	0	0	0	0	4	0	0	0	7	7	0	0	0	0	0	0	0	0	0	0	0	0	0	23	0	0	12	0	0	0	0
OTU5712	0	0	0	0	18	15	0	0	0	0	0	0	0	0	0	25	0	0	0	0	0	0	0	0	0	0	0	0	0	0	0	0	0	0	0	0	0	0	0	0	0	0	0	0	0	0	0	0	0
OTU572	47	0	83	66	28	9	0	48	75	0	13	0	0	0	0	0	0	0	0	0	0	0	0	0	0	0	0	0	0	0	0	0	0	0	0	0	0	0	0	0	0	0	0	0	0	0	0	0	0
OTU5722	0	0	0	0	0	0	0	0	0	0	0	19	0	17	0	0	0	19	0	0	0	0	0	22	34	0	0	0	0	0	0	0	0	0	0	0	0	0	0	9	29	0	0	0	0	0	0	18	19
OTU5726	0	0	0	0	19	0	0	0	0	9	0	21	50	60	32	14	66	0	0	0	0	0	0	0	0	0	0	0	0	0	0	0	0	0	0	0	0	0	0	0	0	0	0	0	0	0	0	0	0
OTU5727	0	0	0	0	0	0	0	0	0	0	0	12	10	16	13	17	73	0	0	0	0	0	0	0	0	0	0	0	23	0	0	0	0	0	0	20	0	0	0	0	0	0	0	0	0	0	0	0	0
OTU573	284	0	1119	236	0	0	0	131	110	343	8	0	0	0	0	0	0	0	0	0	0	0	0	0	0	0	0	0	0	0	0	0	0	0	0	0	0	0	0	0	0	0	0	0	0	0	0	0	0
OTU5729	0	0	0	0	0	0	0	0	0	0	0	0	0	0	0	0	0	33	0	18	0	17	0	21	27	0	0	0	0	0	0	0	0	9	0	7	0	0	0	0	0	0	0	0	0	0	0	0	0
OTU5731	0	0	0	0	0	8	0	0	0	0	0	0	0	0	0	0	6	0	0	0	0	0	0	0	0	0	0	0	0	0	0	0	0	0	0	0	0	0	0	0	0	0	0	0	0	0	0	0	0
OTU5734	0	0	0	0	12	0	0	0	0	0	0	19	0	0	0	15	0	0	0	0	0	0	0	0	0	0	0	0	0	0	0	0	0	0	0	0	0	0	0	10	0	0	0	0	0	0	0	19	0
OTU5738	12	0	15	0	0	0	0	0	0	18	0	0	0	0	0	0	0	0	0	0	0	0	0	0	0	0	0	0	0	0	0	0	0	0	0	0	0	0	0	0	0	0	0	0	0	0	0	0	0
OTU5744	0	0	6	5	0	0	0	0	0	4	0	0	0	0	0	0	0	0	0	0	0	0	5	0	0	11	0	0	0	0	0	13	0	0	49	0	38	0	51	0	0	0	33	0	0	0	0	0	0
OTU5746	0	0	0	0	0	52	0	0	0	0	0	10	0	0	3	0	0	0	0	7	0	0	0	0	0	0	0	0	0	0	0	5	0	25	0	16	0	9	0	6	6	0	0	0	0	0	0	0	5
OTU5749	0	0	0	0	15	0	0	0	0	0	0	0	0	0	0	0	0	0	0	0	0	0	0	0	0	0	0	0	0	0	0	0	0	0	0	0	0	0	0	0	0	0	0	0	0	0	0	0	0
OTU5752	0	0	36	16	0	0	0	0	0	0	0	0	0	0	0	0	0	0	0	0	0	0	0	0	0	0	0	0	0	0	0	0	0	0	0	0	0	0	0	0	0	0	0	0	0	0	0	0	0
OTU5754	0	0	0	0	0	0	0	0	0	0	0	0	0	0	0	0	0	0	0	0	15	0	13	0	0	0	0	0	0	0	0	0	0	0	0	0	0	0	0	0	0	0	0	0	0	0	0	0	14
OTU5757	0	0	0	0	6	0	0	0	0	0	0	15	0	0	12	9	7	0	0	12	0	0	0	0	7	0	0	0	0	0	0	0	0	0	0	0	0	0	0	0	0	0	0	0	0	0	0	0	0
OTU5758	8	0	5	0	0	0	0	5	0	0	4	0	0	0	0	0	0	0	0	0	0	0	0	0	0	0	0	0	0	0	0	0	0	0	0	0	0	0	0	0	0	0	0	0	0	0	0	0	0
OTU5760	0	0	0	0	0	0	0	0	0	0	0	0	4	0	0	0	7	0	0	6	0	0	0	0	0	0	0	0	0	0	18	0	0	0	0	0	0	7	0	7	0	0	0	0	0	11	7	9	0
OTU5761	0	0	0	0	0	0	0	0	0	0	0	0	0	0	0	0	0	0	0	0	0	0	0	0	0	0	0	0	0	0	0	0	0	0	0	0	0	0	0	0	0	0	0	0	0	0	0	0	0
OTU5766	19	0	32	15	0	0	0	0	0	0	0	0	0	0	0	0	0	0	0	0	0	0	0	0	0	0	0	0	0	0	0	0	0	0	0	0	0	0	0	0	0	0	0	0	0	0	0	0	0
OTU5767	0	0	0	0	18	0	0	0	0	0	0	0	0	0	0	9	0	0	0	0	0	0	0	9	0	0	0	0	20	0	14	10	0	0	0	0	0	0	0	22	0	0	0	0	0	0	0	0	0
OTU5777	0	0	0	0	0	0	0	0	0	0	0	15	31	50	28	0	31	0	0	0	0	0	0	0	0	0	0	0	0	0	0	0	0	13	0	0	0	0	0	0	0	0	0	0	0	0	0	0	0
OTU578	0	0	82	19	59	12	0	0	0	0	0	8	0	0	0	82	0	9	134	58	594	0	15	46	0	32	0	14	17	0	27	61	0	0	0	0	0	0	10	42	55	0	0	0	0	25	21	409	0
OTU5779	0	0	0	0	0	0	0	0	0	0	19	0	0	0	0	0	0	0	0	0	0	0	0	0	0	0	0	0	38	0	0	0	0	0	0	0	0	0	0	0	0	0	0	0	0	0	0	0	0
OTU5789	0	0	0	39	0	0	0	0	0	0	6	0	0	0	0	0	0	0	0	0	0	0	13	0	0	16	20	18	0	0	0	0	0	0	0	0	0	0	9	0	0	25	0	0	0	0	0	0	0
OTU5791	0	0	0	0	0	0	17	0	0	0	0	0	0	0	0	0	0	0	0	0	0	0	0	0	0	0	0	0	21	0	30	50	0	23	0	0	0	0	0	0	0	0	0	0	0	0	23	41	24
OTU5796	15	0	0	16	0	0	0	21	0	18	0	0	0	0	0	0	0	0	0	0	0	0	0	0	0	0	0	0	0	0	0	0	0	0	0	0	0	0	0	0	0	0	0	0	0	0	0	0	0
OTU5799	16	0	30	0	0	0	0	0	0	0	0	0	0	0	0	0	0	0	0	0	0	0	0	0	0	0	0	0	0	0	0	0	0	0	0	0	0	0	0	0	0	0	0	0	0	0	0	0	0
OTU5806	0	0	20	25	0	0	0	22	0	0	0	0	0	0	0	0	0	0	0	0	0	0	0	0	0	0	0	0	0	0	0	0	0	0	0	0	0	0	0	0	0	0	0	0	0	0	0	0	0
OTU5811	0	0	0	0	7	0	0	0	0	0	0	0	0	9	0	0	0	12	0	0	0	0	0	0	0	0	0	0	14	0	0	8	0	0	0	0	0	0	0	0	12	0	0	0	0	0	0	0	6
OTU5815	21	0	27	17	0	0	0	0	0	6	0	0	0	0	0	0	0	0	0	0	0	0	0	0	0	0	0	0	0	0	0	0	0	0	0	0	0	0	0	0	0	0	0	0	0	0	0	0	0
OTU5819	0	0	0	27	0	0	0	9	25	3	0	0	0	0	0	0	0	0	0	0	0	14	0	0	0	8	0	0	25	0	0	0	0	0	0	0	0	0	0	0	0	0	0	0	0	0	0	0	0
OTU5822	19	0	5	28	0	0	0	22	34	0	0	0	0	0	0	0	0	0	0	0	0	0	0	0	0	0	0	0	0	0	0	0	0	0	0	0	0	0	0	0	0	0	0	0	0	0	0	0	0
OTU5825	0	0	0	0	0	0	0	0	0	0	0	0	0	0	0	0	0	0	0	0	0	0	0	0	0	0	0	0	0	0	0	0	0	0	0	0	0	0	0	0	0	0	0	0	0	0	0	0	0
OTU5828	0	0	0	0	0	0	0	0	0	0	0	0	0	0	0	0	0	0	0	0	0	0	0	0	0	0	0	0	0	0	0	0	0	0	0	0	0	0	0	0	0	0	0	0	0	0	0	0	0
OTU583	61	0	29	32	0	0	0	28	24	47	0	0	0	0	0	0	0	0	25	0	9	0	12	0	0	77	112	49	0	270	0	33	74	0	0	0	0	0	0	0	0	0	0	29	0	0	0	0	0
OTU5829	0	0	0	0	0	0	0	0	0	0	0	0	0	0	0	0	12	0	31	0	15	0	0	0	0	0	0	15	0	0	0	18	0	0	0	0	0	0	0	8	15	0	13	0	0	0	0	0	0
OTU5833	0	0	0	0	14	0	0	0	0	0	0	0	0	0	0	0	0	0	0	0	0	0	0	0	0	0	0	0	0	0	0	0	0	0	0	0	0	0	0	0	0	0	0	0	0	0	0	0	0
OTU5835	0	0	0	0	28	0	0	0	0	0	0	0	19	0	26	8	0	0	0	0	0	0	0	0	0	0	0	0	0	0	0	0	0	0	0	0	0	0	0	0	0	0	0	0	0	0	0	0	0
OTU5838	0	0	0	0	0	0	0	0	0	0	0	11	5	8	0	0	6	0	0	0	0	0	0	0	0	0	0	0	32	0	0	2	0	0	0	0	0	0	0	0	0	0	0	0	0	0	0	0	0
OTU584	11	0	0	0	0	0	0	66	0	0	20	0	0	0	0	0	0	0	7	0	0	0	15	0	0	18	0	0	10	17	0	14	0	0	0	0	0	0	0	0	0	0	0	125	21	0	0	0	0
OTU5839	0	0	0	0	13	0	0	0	0	0	0	0	0	0	0	0	0	11	0	0	0	0	0	18	26	0	0	0	0	0	0	0	0	0	0	0	0	0	0	0	0	0	0	0	0	0	0	0	0
OTU5844	0	0	0	0	0	0	0	0	0	0	0	0	0	0	0	0	0	0	0	0	0	0	0	0	0	0	0	0	0	0	0	0	0	0	0	0	0	0	0	0	0	0	0	0	0	0	0	0	0
OTU5853	0	0	0	0	0	0	0	0	0	0	0	0	0	0	0	0	0	24	0	11	0	0	0	27	17	0	0	0	0	0	0	0	0	0	0	0	0	0	0	0	0	0	0	0	0	13	13	32	0
OTU5854	0	0	0	0	0	0	0	0	0	0	0	24	0	16	22	0	19	0	0	0	0	0	0	0	0	0	0	0	0	0	0	0	0	0	0	0	0	0	0	0	0	0	0	0	0	0	0	0	0
OTU5855	0	0	7	7	19	6	0	0	0	0	0	0	0	0	0	0	0	0	0	0	0	0	0	0	0	0	0	0	18	0	0	0	0	0	0	0	0	0	0	0	0	0	0	0	0	0	0	0	0
OTU5857	0	0	0	0	7	0	0	0	0	0	0	0	0	0	0	0	0	0	0	7	0	0	0	19	50	0	0	0	7	0	0	0	0	0	0	0	0	0	0	0	0	0	0	0	0	0	0	0	0
OTU586	18	0	38	24	18	15	40	0	0	0	0	0	0	18	0	0	5	0	0	0	0	25	0	19	0	0	0	0	17	0	0	128	0	20	58	14	62	29	34	26	12	0	14	0	0	11	47	0	0
OTU5859	0	0	0	0	0	13	0	0	0	0	0	0	0	0	0	0	0	0	0	0	0	0	0	0	0	0	0	0	0	0	0	0	0	0	0	0	0	0	0	0	0	0	0	0	0	0	0	0	0
OTU5866	0	0	0	0	0	0	0	0	0	0	0	14	24	29	0	0	0	0	0	137	0	0	0	0	0	0	0	0	0	0	0	0	0	0	0	0	0	0	0	0	0	0	0	0	0	0	0	0	0
OTU587	26	0	18	36	0	12	0	12	10	17	6	0	0	0	0	0	0	0	10	0	6	0	10	0	0	14	14	16	0	0	4	52	0	0	0	0	0	0	0	0	0	0	0	0	0	0	0	0	0
OTU5870	0	0	0	0	0	0	0	0	0	0	0	0	0	0	0	0	0	0	0	0	0	0	0	0	0	0	0	0	0	0	0	0	0	0	0	0	0	0	0	0	0	0	0	0	0	0	0	0	0
OTU5872	0	0	32	47	0	0	0	0	0	0	0	0	0	0	0	0	0	0	0	0	0	0	0	0	0	0	0	0	0	0	0	0	0	0	0	0	0	0	0	0	0	0	0	0	0	0	0	0	0
OTU5879	0	0	21	0	0	0	0	0	0	0	0	6	0	0	7	0	0	0	0	0	0	0	0	0	0	0	0	0	0	0	0	0	0	0	0	0	0	0	0	0	0	0	0	0	0	0	0	0	0
OTU5880	0	0	0	0	0	0	0	0	0	0	0	0	0	0	0	21	0	0	0	0	0	0	0	0	0	0	0	0	0	0	0	26	0	30	0	30	0	0	0	25	0	0	0	0	0	9	0	34	0
OTU5883	26	0	22	10	0	0	0	0	0	12	0	0	0	0	0	0	0	0	0	0	0	0	0	0	0	0	0	0	0	0	0	0	0	0	0	0	0	0	0	0	0	0	0	0	0	0	0	0	0
OTU5888	0	0	0	0	0	0	0	0	0	0	0	0	0	12	0	27	0	0	0	0	0	0	0	0	0	0	0	0	23	0	0	0	0	0	0	0	0	0	0	0	0	0	0	0	0	0	0	0	0
OTU589	47	11	18	37	4	8	0	19	81	67	212	0	0	0	0	0	0	0	0	0	0	0	0	0	0	0	0	0	0	0	0	0	0	0	0	0	0	0	0	0	0	0	0	0	0	0	0	0	0
OTU5889	0	0	0	0	0	0	0	0	0	0	0	5	7	0	0	0	0	0	0	4	0	0	0	0	0	0	0	0	13	0	8	0	0	0	0	0	0	0	0	4	0	0	0	0	0	0	0	0	0
OTU5890	0	0	0	0	0	0	4	0	0	0	0	0	0	0	0	0	0	0	7	0	4	0	6	0	0	0	0	0	0	0	0	12	0	0	0	0	0	0	0	0	5	0	0	0	0	0	0	0	0
OTU5892	0	0	0	0	0	0	0	0	0	0	0	0	0	0	0	0	0	0	0	0	0	0	0	0	0	0	0	0	0	0	0	0	0	0	0	0	0	0	0	0	0	0	0	0	0	0	0	0	0
OTU5897	52	0	43	0	0	0	0	0	27	13	0	0	0	0	0	0	0	0	0	0	0	0	0	0	0	0	0	0	0	0	0	0	0	0	0	0	0	0	0	0	0	0	0	0	0	0	0	0	0
OTU59	137	31	232	280	77	106	111	95	170	133	108	48	43	51	34	43	0	30	248	24	185	141	148	23	49	161	132	181	116	173	127	212	94	115	189	64	208	153	110	56	53	61	307	15	15	66	315	130	171
OTU590	49	0	57	70	0	0	27	40	63	40	19	0	0	0	0	0	0	0	64	0	47	0	62	0	0	53	33	61	13	57	0	62	0	0	33	0	43	0	28	0	22	0	25	0	0	0	0	0	0
OTU5899	0	0	0	195	0	0	0	0	0	0	0	0	0	0	0	0	0	0	0	0	0	0	0	0	0	0	0	0	0	0	0	0	0	0	0	0	0	0	0	0	0	0	48	0	0	0	0	0	0
OTU5900	0	0	0	0	0	0	0	0	0	0	0	0	0	0	0	11	0	0	0	0	0	0	0	0	26	0	0	0	0	0	0	0	0	10	0	0	0	0	0	0	0	0	0	0	0	0	0	0	0
OTU5901	0	0	0	0	0	0	0	0	0	0	0	0	0	0	0	132	0	0	0	31	0	0	0	52	30	0	0	0	0	0	0	0	0	0	0	0	0	0	0	0	0	0	0	0	0	0	0	0	0
OTU5902	15	0	12	42	0	0	20	29	0	55	0	0	0	0	0	0	0	0	0	0	0	0	0	0	0	8	0	0	0	0	0	53	0	0	0	0	0	0	0	0	7	0	0	0	0	0	0	0	0
OTU5905	0	0	0	0	11	14	0	0	0	0	0	22	13	11	0	11	56	26	0	28	0	0	0	20	34	0	0	0	0	0	0	0	0	0	0	0	0	0	0	0	0	0	0	0	0	0	0	0	0
OTU5906	0	0	0	51	0	0	0	37	0	0	0	0	0	0	0	0	0	0	0	0	0	0	0	0	0	0	0	0	0	0	0	0	0	0	0	0	0	0	0	0	0	0	0	0	0	0	0	0	0
OTU591	12	11	5	0	28	0	0	102	0	0	0	0	0	0	0	0	0	0	15	0	82	0	0	0	0	0	0	41	55	0	226	85	0	0	36	0	352	67	42	0	0	0	335	0	10	0	0	0	0
OTU5915	0	0	0	0	0	0	0	0	0	0	0	0	0	0	0	0	0	0	0	0	0	0	0	0	0	0	0	0	0	5	0	0	0	0	0	7	4	0	0	0	0	0	0	8	0	0	0	0	0
OTU5920	20	0	0	0	0	0	0	0	0	0	0	0	20	25	0	0	0	0	0	0	0	0	0	0	26	0	0	0	0	0	0	0	11	0	10	0	0	55	18	0	0	0	0	0	0	0	0	0	0
OTU5921	0	0	0	0	0	0	0	0	0	0	0	0	0	0	0	0	0	0	0	0	0	0	0	0	0	0	0	0	0	0	0	0	0	0	0	0	0	0	0	0	0	0	0	0	0	0	0	0	0
OTU5923	0	0	0	0	0	0	0	0	0	0	0	0	0	0	0	0	0	0	0	0	0	0	0	0	0	0	0	0	0	0	0	0	0	0	0	0	0	0	0	0	0	0	0	0	0	0	0	0	0
OTU5926	0	0	0	0	0	0	0	0	0	0	0	0	0	0	0	0	0	0	0	0	0	0	0	0	0	0	0	0	0	0	0	0	0	0	0	0	0	0	0	0	0	0	0	12	0	0	0	0	0
OTU5928	0	0	0	0	0	0	0	0	0	0	0	0	0	0	0	0	0	0	0	0	0	7	0	0	0	0	0	0	9	0	0	6	0	8	7	3	3	0	0	0	0	0	0	12	23	0	4	0	0
OTU5930	12	0	23	0	0	0	0	8	0	10	0	0	0	0	0	0	0	0	0	0	0	0	0	0	0	0	0	0	0	0	0	0	0	0	0	0	0	0	0	0	0	0	0	0	0	0	0	0	0
OTU5932	0	0	0	0	0	0	0	0	0	0	0	0	0	0	0	0	0	0	0	0	0	0	0	0	0	0	0	0	0	0	0	0	0	0	0	0	0	0	0	0	0	0	0	0	0	0	0	0	0
OTU5935	0	0	0	42	0	0	0	0	0	0	0	0	0	0	0	0	0	0	0	0	0	0	0	0	0	0	0	0	0	0	0	0	0	0	0	0	0	0	0	0	0	0	0	0	0	0	0	0	0
OTU5937	0	0	0	16	0	0	0	17	0	0	0	0	0	0	0	0	0	0	0	0	0	0	0	0	0	0	32	0	20	0	0	6	0	0	7	0	24	0	0	0	0	0	0	0	6	0	0	0	0
OTU5941	0	0	0	0	0	0	0	0	0	0	0	0	0	0	0	22	0	23	0	16	0	0	0	0	53	0	0	0	0	0	0	0	0	0	0	0	0	0	0	0	0	0	0	0	0	0	0	0	0
OTU5947	0	0	0	0	0	0	0	0	0	0	0	0	0	0	0	0	232	0	0	0	0	0	0	0	0	0	0	0	0	0	0	0	0	0	0	0	0	0	0	0	0	0	0	0	0	0	0	0	0
OTU595	30	0	34	95	0	0	0	29	33	45	0	0	0	0	0	0	0	0	53	0	43	0	59	0	0	41	53	60	19	72	43	53	45	0	30	0	25	0	0	0	0	0	27	0	0	0	0	0	0
OTU5961	0	0	12	12	0	0	0	6	6	0	0	0	0	0	0	0	0	0	0	0	0	0	0	0	0	15	0	7	3	0	0	9	4	0	15	0	9	0	9	0	0	0	6	0	0	0	0	0	0
OTU5971	0	0	0	0	0	0	0	0	0	0	0	0	0	0	0	0	0	0	0	0	0	0	0	0	0	0	0	0	0	0	0	0	0	0	0	0	0	0	0	0	0	0	0	0	0	0	0	0	10
OTU5977	0	0	0	0	0	0	0	0	0	0	0	0	0	0	0	0	0	0	0	0	0	0	0	0	0	0	0	0	0	0	0	0	0	0	0	0	0	0	0	0	0	0	0	0	0	0	0	0	0
OTU5980	0	0	0	0	0	0	0	0	0	0	0	0	0	0	0	0	0	0	0	0	0	0	0	0	0	0	0	0	0	0	0	0	0	0	0	0	0	0	0	0	0	0	0	0	0	0	0	0	0
OTU5982	0	0	0	0	0	0	0	30	0	0	0	0	0	0	0	0	0	0	0	0	0	0	0	0	0	0	0	0	0	0	0	0	0	0	0	0	0	0	0	0	0	0	0	0	0	0	0	0	0
OTU5985	0	0	0	0	0	0	0	0	0	0	29	0	0	0	0	0	0	0	0	0	0	0	0	0	0	0	0	0	0	0	0	0	0	0	0	0	0	0	0	0	0	0	0	0	0	0	0	0	0
OTU5989	0	0	0	0	0	0	0	0	0	0	0	0	0	0	0	0	0	0	23	0	23	0	0	0	0	8	0	12	0	0	0	16	0	0	0	0	0	0	0	0	12	0	10	0	0	0	0	0	0
OTU5994	0	0	0	0	0	6	0	0	0	0	0	0	0	0	0	0	0	0	0	0	0	0	0	0	0	0	0	0	0	0	0	0	0	0	0	0	0	0	0	0	0	0	0	0	0	0	0	0	0
OTU5998	0	0	0	0	0	51	0	0	0	0	0	0	0	0	0	0	0	0	0	0	0	0	0	0	0	0	0	0	0	0	0	0	0	0	0	0	0	0	0	0	0	0	0	0	0	0	0	0	0
OTU6	131	7	73	46	0	26	0	120	107	127	252	0	0	5	0	0	0	0	59	0	50	419	42	0	0	228	195	68	413	268	6	496	145	0	78	0	66	0	55	40	0	96	33	1423	5535	0	48	0	0
OTU60	0	0	0	0	0	168	0	0	0	0	0	0	0	0	0	0	208	0	0	0	0	567	0	0	0	0	0	0	47	0	34	86	0	0	0	0	0	459	0	0	0	0	0	92	61	36	424	0	0
OTU5999	0	0	0	0	0	0	0	0	0	0	0	0	0	0	0	0	0	0	0	0	0	0	0	0	0	0	0	0	0	0	0	0	0	0	0	0	0	0	0	0	0	0	0	0	0	0	0	0	0
OTU6001	0	16	0	0	18	0	0	11	0	0	11	0	0	0	17	0	0	0	18	22	0	0	0	14	0	0	4	0	0	0	0	0	0	27	0	0	0	0	0	0	0	0	0	0	0	0	0	0	0
OTU6004	0	0	15	21	14	0	0	0	0	7	0	0	0	0	0	9	0	0	0	0	0	0	0	0	0	0	0	0	0	0	0	0	0	0	0	0	0	0	0	0	0	0	0	0	0	0	0	0	0
OTU6007	0	0	0	0	8	12	0	0	0	0	0	0	0	0	0	0	0	0	0	0	0	0	0	0	0	0	0	0	0	0	0	0	0	0	0	0	0	0	0	0	0	0	0	0	0	0	0	0	0
OTU6009	0	0	0	21	0	0	0	27	0	0	0	0	0	0	0	0	0	0	38	0	0	0	0	0	0	0	0	9	0	0	0	0	0	0	0	0	0	0	0	0	0	0	0	0	0	0	0	0	0
OTU6011	0	0	0	0	0	12	0	0	0	0	0	19	26	18	0	0	0	0	0	26	0	0	0	0	0	0	0	0	0	0	0	24	0	0	0	27	0	0	0	21	28	0	0	0	0	0	7	40	0
OTU6013	0	0	0	0	0	0	0	0	0	0	0	0	0	0	0	0	0	0	0	0	0	0	0	0	0	0	0	0	0	0	0	0	0	0	0	0	0	0	0	0	0	0	0	0	0	0	0	0	0
OTU6016	0	0	0	0	9	12	0	0	0	0	0	0	0	0	0	0	0	0	0	0	0	0	0	0	0	0	0	0	0	0	0	0	0	0	0	0	0	0	0	0	0	0	0	0	0	0	0	0	0
OTU6017	0	0	0	0	0	0	0	0	0	0	0	0	0	12	0	0	0	0	0	0	0	0	0	0	0	0	0	0	0	0	21	47	0	18	0	0	0	0	0	19	0	0	0	0	0	17	0	0	40
OTU6018	0	0	0	0	6	0	0	0	0	0	0	0	0	0	0	0	0	0	12	0	23	0	5	0	0	7	0	0	19	0	20	10	0	0	0	0	0	9	0	12	0	0	15	0	0	0	0	0	0
OTU6019	0	0	0	7	0	0	0	10	0	0	0	0	0	0	0	0	0	0	0	0	0	0	26	0	0	0	0	0	0	24	0	0	0	0	0	0	0	0	0	0	0	0	0	0	0	0	0	0	0
OTU6033	0	0	0	0	30	0	0	0	0	0	0	0	27	0	0	0	0	0	0	0	0	0	0	0	0	0	0	0	0	0	0	25	0	0	0	0	0	0	0	28	0	0	0	0	0	18	5	29	37
OTU6036	0	0	0	0	0	0	11	0	0	0	0	0	0	0	0	0	50	0	0	0	0	0	0	0	0	0	0	0	20	0	0	19	0	0	0	0	0	13	0	0	0	0	0	0	0	0	0	0	14
OTU6040	0	0	0	0	16	0	4	0	0	0	0	0	7	6	26	35	0	7	0	3	0	0	0	15	0	0	0	0	21	0	6	28	0	36	0	25	0	0	0	10	7	0	0	0	0	0	0	0	0
OTU6041	8	0	0	15	0	0	0	0	10	0	0	0	0	0	0	0	0	0	0	0	0	0	0	0	0	0	0	0	0	0	0	0	0	0	0	0	0	0	0	0	0	0	0	0	0	0	0	0	0
OTU6045	0	0	0	0	0	0	0	0	0	0	0	11	13	0	6	0	12	0	0	11	0	0	0	0	5	0	0	0	0	0	0	0	0	0	0	0	0	0	0	0	6	0	0	0	0	4	4	0	0
OTU6049	29	0	24	29	0	0	0	11	14	9	0	0	0	0	0	0	0	0	0	0	0	0	0	0	0	0	0	0	0	0	0	0	0	0	0	0	0	0	0	0	0	0	0	0	0	0	0	0	0
OTU6051	0	0	0	0	0	0	0	0	0	0	0	0	0	0	0	0	0	0	0	0	0	0	0	0	0	0	0	0	0	0	0	0	0	0	0	0	0	0	0	0	0	0	0	0	0	0	0	0	0
OTU6053	0	0	0	0	0	0	7	0	0	0	0	0	0	20	28	0	0	0	0	0	0	0	0	0	0	0	0	0	0	0	10	19	0	12	0	0	0	13	0	14	15	0	0	0	0	0	8	0	16
OTU6054	0	0	0	0	0	3	0	0	0	0	0	0	0	0	0	0	0	0	0	0	0	0	0	0	0	0	0	0	0	0	0	0	0	0	0	0	0	0	0	0	0	0	0	0	0	0	0	0	0
OTU6066	21	4	0	35	0	0	0	16	0	0	0	0	0	0	0	0	0	0	0	0	0	0	0	0	0	0	0	0	0	0	0	0	0	0	0	0	0	0	0	0	0	0	0	0	0	0	0	0	0
OTU6071	0	0	0	0	28	0	0	0	0	0	0	0	0	0	0	0	0	0	0	0	0	0	5	0	0	0	0	0	59	0	0	0	0	0	0	0	0	0	0	0	0	0	0	0	0	0	0	0	0
OTU6072	0	0	0	0	0	11	0	0	0	0	0	7	0	0	0	0	15	0	0	0	0	0	0	0	0	0	0	0	0	0	0	0	0	0	0	0	0	0	0	0	0	0	0	0	0	0	0	0	0
OTU6073	0	0	0	0	0	9	0	0	0	0	0	0	0	0	0	0	0	0	0	0	0	0	0	11	11	0	0	0	0	0	0	0	0	0	0	0	0	0	0	0	0	0	0	0	0	0	0	0	14
OTU6077	0	0	0	0	0	23	0	0	0	0	0	0	12	0	0	10	0	7	0	0	0	0	0	22	8	0	0	0	0	0	9	38	0	6	0	0	0	6	0	10	10	0	0	0	0	0	21	45	23
OTU6081	5	0	5	7	0	0	0	0	0	4	0	0	0	0	0	0	0	0	0	0	0	0	0	0	0	0	0	0	0	0	0	0	0	0	0	0	0	0	0	0	0	0	0	0	0	0	0	0	0
OTU6086	0	0	0	0	0	0	0	0	0	0	0	0	0	8	6	18	8	0	0	0	0	0	0	0	0	0	0	0	0	0	0	0	0	0	0	0	0	0	0	0	0	0	0	0	0	0	0	0	0
OTU6089	0	0	0	0	0	0	0	0	0	0	0	0	0	14	23	0	32	0	0	0	0	0	0	0	0	0	0	0	0	0	0	0	0	0	0	0	0	0	0	0	0	0	0	0	0	0	0	0	0
OTU6090	23	0	33	31	0	0	0	0	0	0	0	0	0	0	0	0	0	0	7	0	6	0	0	0	0	14	0	0	0	0	10	15	0	0	25	0	11	0	13	0	0	0	32	0	0	0	0	0	0
OTU6094	0	0	0	0	0	0	0	0	0	0	0	0	9	36	29	11	11	9	0	8	0	0	0	33	0	0	0	0	0	0	0	0	0	0	0	0	0	0	0	0	21	0	0	0	0	0	0	0	0
OTU6095	7	0	0	0	0	0	0	0	0	0	0	0	0	0	0	0	0	0	0	0	0	0	0	0	0	0	0	0	0	0	0	0	0	0	0	0	0	0	0	0	0	0	0	0	0	0	0	0	0
OTU6096	0	0	0	0	0	0	0	0	0	0	0	0	0	0	0	0	0	0	0	0	9	0	0	0	0	0	0	0	0	0	0	0	0	0	6	0	9	0	0	0	0	0	0	0	0	0	164	0	0
OTU6097	19	0	29	29	0	0	0	0	0	0	0	0	0	0	0	0	0	0	0	0	17	0	0	0	0	0	0	31	0	0	0	0	0	0	0	0	0	0	0	0	0	0	0	0	0	0	0	0	0
OTU610	198	0	69	409	0	0	0	171	643	140	365	0	0	0	0	0	64	0	0	0	0	0	0	0	0	0	0	0	0	0	0	0	0	0	0	0	0	0	0	0	0	0	0	0	0	0	0	0	0
OTU6099	0	0	22	5	0	0	0	11	0	0	0	0	0	0	0	0	0	0	0	0	0	0	0	0	0	0	0	0	0	0	0	0	0	0	0	0	0	0	0	0	0	0	0	0	0	0	0	0	0
OTU6106	0	0	0	0	0	0	0	0	0	26	42	0	0	0	0	0	0	0	0	0	0	0	0	0	0	0	0	0	0	0	0	0	0	0	0	0	0	0	0	0	0	0	0	0	0	0	0	0	0
OTU6107	0	0	0	0	0	0	0	0	0	0	0	0	0	0	0	0	0	0	0	0	0	0	0	0	0	0	0	0	0	0	0	0	0	0	0	0	0	0	0	0	0	0	0	0	0	0	0	0	0
OTU611	34	0	59	73	10	0	0	20	15	0	0	0	0	4	0	0	0	0	58	0	60	0	21	0	0	54	0	16	0	0	20	54	0	44	45	0	36	59	37	24	0	0	103	0	0	0	0	0	0
OTU6109	0	0	0	0	0	0	0	0	0	0	0	0	0	0	0	0	27	23	0	0	0	0	0	28	0	0	0	0	23	0	0	0	0	0	0	0	0	0	0	23	38	0	0	0	0	0	0	0	0
OTU6111	0	0	0	0	0	0	0	0	0	0	0	0	0	0	0	0	0	0	0	0	0	0	0	0	0	0	0	0	0	0	0	0	0	0	0	0	0	0	0	0	0	0	0	0	0	0	0	0	0
OTU6113	0	0	0	0	10	0	0	0	0	0	0	0	0	9	16	8	14	12	0	13	0	0	0	0	0	0	0	0	19	0	0	0	0	0	0	0	0	0	0	0	0	0	0	0	0	0	0	0	0
OTU6115	0	0	0	0	5	0	0	0	0	0	0	0	19	13	9	5	11	0	0	0	0	7	0	0	0	0	0	0	0	0	0	13	0	0	0	0	0	0	0	0	0	0	0	0	0	0	9	15	6
OTU6116	24	0	38	0	0	0	0	22	0	53	0	0	0	0	0	0	0	0	0	0	0	0	0	0	0	0	0	0	0	0	0	0	0	0	0	0	0	0	0	0	0	0	0	0	0	0	0	0	0
OTU6122	0	0	0	5	0	0	0	7	0	0	0	0	0	0	0	0	0	0	0	0	0	0	0	0	0	0	0	0	0	0	0	0	0	0	0	0	0	0	0	0	0	0	0	0	0	0	0	0	0
OTU6123	0	0	0	0	23	10	0	0	0	0	0	0	0	0	0	0	0	0	0	0	0	0	0	0	0	0	0	0	0	0	0	0	0	0	0	0	0	0	0	0	0	0	0	0	0	0	0	0	0
OTU6125	0	0	4	2	12	28	0	0	0	0	0	0	0	0	32	42	0	0	0	0	0	0	0	0	0	0	0	0	0	0	0	0	0	0	0	0	0	0	0	0	0	0	0	0	0	0	0	0	0
OTU6127	0	0	0	0	0	0	0	0	0	0	0	0	0	0	0	0	0	0	0	0	0	0	0	11	0	0	0	0	6	0	0	0	0	0	0	0	0	0	0	0	0	0	0	0	0	0	0	31	0
OTU6129	9	0	10	16	0	0	8	8	4	4	0	0	0	0	0	0	0	0	10	0	18	0	7	0	0	0	5	3	0	0	0	12	3	0	0	0	0	0	0	0	0	0	0	0	0	0	0	0	0
OTU6132	0	0	0	0	0	0	0	0	0	0	0	0	0	0	0	0	0	0	0	0	0	0	0	0	0	0	0	0	0	0	0	0	0	0	0	0	0	0	0	0	0	0	0	0	0	0	0	0	0
OTU6135	0	0	0	0	0	0	0	0	0	0	0	0	13	23	0	0	0	0	0	11	0	0	0	0	0	0	0	0	0	0	0	0	0	0	0	0	0	0	0	0	0	0	0	0	0	0	0	0	0
OTU6141	0	0	14	0	0	0	0	0	0	0	0	0	0	0	0	0	0	0	39	0	27	0	0	0	0	0	0	0	9	4	4	12	5	0	0	0	0	0	0	0	0	0	0	0	0	0	0	0	0
OTU6145	0	0	0	0	12	0	0	0	0	0	0	10	0	8	8	0	4	0	0	6	0	0	0	8	73	0	0	0	0	0	8	0	0	0	0	0	0	10	0	0	0	0	0	0	0	0	0	0	0
OTU6146	29	0	17	0	0	0	0	0	0	27	0	0	0	0	0	0	0	0	0	0	0	0	0	0	0	0	0	0	0	0	0	0	0	0	0	0	0	0	0	0	0	0	0	0	0	0	0	0	0
OTU6148	0	0	0	0	0	0	0	0	0	0	0	0	0	0	0	0	0	0	0	0	0	0	0	0	0	0	0	0	0	0	0	0	0	0	0	0	0	0	0	0	0	0	0	0	0	0	0	0	30
OTU615	0	0	0	0	0	0	0	13	0	0	18	0	0	0	0	0	0	0	0	0	0	0	0	0	0	0	0	0	0	0	0	0	0	0	0	0	0	0	0	0	0	0	0	0	0	0	0	0	0
OTU6155	0	0	33	0	0	0	0	0	23	35	0	0	0	0	0	0	0	0	14	0	16	0	0	0	0	18	14	0	0	0	10	0	10	0	0	0	0	0	0	0	0	0	0	0	0	0	0	0	0
OTU6157	0	0	0	11	0	0	0	0	0	0	0	0	0	0	0	0	0	0	0	0	0	0	0	0	0	0	0	0	0	0	0	0	0	18	0	0	0	23	0	0	0	0	0	0	0	0	0	0	0
OTU6159	0	0	0	20	0	30	0	12	20	14	0	0	0	0	0	0	37	0	0	0	0	0	0	0	0	0	0	0	0	0	0	0	0	0	0	0	0	0	0	0	0	0	0	0	0	0	0	0	0
OTU6162	0	0	0	0	0	0	0	0	0	0	0	0	0	0	0	0	0	0	0	0	0	0	0	0	0	0	0	0	25	0	0	18	0	0	0	0	0	0	0	0	0	0	0	0	0	0	0	26	30
OTU6164	0	0	0	22	0	0	0	0	0	0	0	0	0	17	9	0	37	0	0	0	0	0	0	0	0	0	0	0	0	0	0	0	0	0	0	0	0	0	0	0	0	0	0	0	0	0	0	0	0
OTU6165	16	0	9	17	0	0	0	4	3	10	0	0	0	0	0	0	0	0	0	0	0	0	0	0	0	0	0	0	0	0	0	0	0	0	0	0	0	0	0	0	0	0	0	0	0	0	0	0	0
OTU6166	0	0	0	0	8	11	0	0	9	0	0	11	12	4	13	16	15	0	0	0	0	0	0	0	0	0	0	0	0	0	0	0	0	0	0	0	0	0	0	0	0	0	0	0	0	0	0	0	0
OTU6174	0	0	0	0	0	0	0	0	0	0	0	0	0	0	0	0	0	0	0	0	0	0	0	0	0	0	0	0	0	0	0	0	0	0	0	0	0	24	51	108	0	45	0	41	0	0	0	0	0
OTU6175	11	0	25	0	0	0	0	21	22	26	0	0	0	0	0	0	0	0	0	0	0	0	0	0	0	0	0	0	0	0	0	0	0	0	0	0	0	0	0	0	0	0	0	0	0	0	0	0	0
OTU6178	7	0	21	7	0	0	0	0	0	0	0	0	0	0	0	0	0	0	46	0	33	0	11	0	0	15	0	0	0	0	0	0	0	0	0	0	0	0	0	0	0	0	0	0	0	0	0	0	0
OTU6180	0	0	0	0	0	0	2	0	0	0	0	0	6	0	5	0	0	0	0	0	0	0	0	0	0	0	0	0	0	0	3	0	0	9	0	13	0	7	0	8	0	0	0	0	0	0	0	0	0
OTU6182	0	0	0	0	0	0	0	0	0	0	0	0	0	0	0	0	0	0	0	0	0	0	0	0	0	0	0	0	0	0	0	0	0	0	59	0	42	0	0	0	0	0	0	0	0	0	0	0	0
OTU6185	0	0	0	0	0	0	0	0	0	0	0	0	0	3	2	0	0	0	0	0	0	0	0	0	0	0	0	0	0	0	0	21	0	0	0	0	0	0	0	235	0	0	0	0	0	0	0	0	0
OTU6189	9	0	0	8	0	0	0	0	0	0	0	3	0	0	0	0	0	0	0	0	0	0	0	0	0	0	0	0	0	0	0	0	0	0	0	0	0	0	0	0	0	0	0	0	0	0	0	0	0
OTU6191	15	0	21	13	0	0	0	0	0	0	0	0	0	0	0	0	22	0	24	0	10	0	0	0	0	0	0	0	0	0	0	0	0	0	0	0	0	0	23	0	0	0	0	0	0	0	0	0	0
OTU62	0	0	0	0	0	0	0	0	0	0	0	82	126	137	119	53	151	114	0	21	0	110	0	84	59	0	0	0	0	0	0	10	0	51	0	57	0	28	0	40	0	0	0	0	0	0	0	0	0
OTU6200	0	0	0	0	0	0	0	0	0	0	0	0	0	0	0	0	0	0	0	0	0	0	0	0	0	0	0	0	0	0	0	0	0	0	0	0	0	0	0	0	0	0	0	0	0	0	0	0	0
OTU6204	0	0	0	0	23	0	0	0	0	0	0	27	17	20	0	1	17	0	0	0	0	0	0	0	0	0	0	0	0	0	0	0	0	0	0	0	0	0	0	0	0	0	0	0	0	0	0	0	0
OTU6206	18	0	19	20	0	0	0	0	0	0	0	0	0	0	0	0	0	0	0	0	13	0	6	0	0	0	0	0	0	0	0	13	0	0	0	0	0	0	0	0	0	0	0	0	0	0	0	0	0
OTU621	29	0	36	126	0	17	19	52	39	44	13	0	0	0	0	0	0	0	47	0	30	0	31	0	0	52	11	54	34	26	0	84	33	0	67	0	68	0	85	0	16	0	68	0	0	0	0	0	0
OTU6211	21	0	69	0	0	0	0	3	0	0	0	0	0	0	0	0	0	0	0	0	0	0	0	0	0	0	0	0	0	0	0	0	0	0	0	0	0	0	0	0	0	0	0	0	0	0	0	0	0
OTU6213	0	0	0	0	0	15	0	0	0	0	0	24	0	0	0	0	0	13	0	0	0	0	0	5	0	0	0	0	0	0	0	0	0	0	0	0	0	0	0	0	0	0	0	0	0	0	0	0	0
OTU6215	16	0	0	23	0	0	0	0	15	0	0	0	0	0	0	0	0	0	0	0	10	0	11	0	0	0	5	13	0	0	14	0	0	0	10	0	0	0	6	0	0	0	0	0	0	0	0	0	0
OTU6216	0	0	0	0	0	0	0	0	0	0	0	0	14	0	0	0	0	0	0	0	0	0	0	0	0	0	0	0	0	0	0	0	0	0	0	0	0	0	0	0	0	0	0	0	0	0	0	0	0
OTU6219	0	0	0	0	0	0	0	0	0	0	0	0	0	0	0	14	0	0	3	0	0	0	0	10	7	0	0	0	0	0	0	12	0	0	0	0	0	0	0	0	0	0	0	0	0	0	0	0	0
OTU6221	0	0	0	0	5	11	0	0	0	0	0	10	0	8	0	14	0	7	0	4	0	0	0	10	0	0	0	0	11	0	4	18	0	8	0	11	0	14	0	0	17	0	0	0	0	0	0	0	0
OTU6222	25	0	17	11	0	0	0	10	0	17	0	0	0	0	0	0	0	0	0	0	0	0	0	0	0	0	0	0	0	0	0	0	0	0	0	0	0	0	0	0	0	0	0	0	0	0	0	0	0
OTU6224	0	0	0	0	0	0	0	0	0	0	0	0	0	0	0	0	0	0	0	0	0	0	0	0	0	0	0	0	0	0	0	0	0	0	0	0	0	0	0	0	0	0	0	0	0	0	0	0	0
OTU6229	0	12	0	69	0	0	0	0	0	0	0	0	0	0	0	0	0	0	0	0	0	0	0	0	0	0	0	0	0	0	0	0	0	0	0	0	0	0	0	0	0	0	0	0	0	0	0	0	0
OTU6232	0	0	0	0	0	0	0	0	0	0	0	0	0	0	0	34	0	0	0	0	0	0	0	0	0	0	0	0	0	0	0	0	0	0	0	0	0	0	0	0	0	0	0	0	0	0	0	0	0
OTU6235	0	0	0	0	0	0	0	0	0	0	0	0	0	0	0	0	0	0	0	0	0	0	0	0	0	0	0	0	0	0	0	0	0	0	0	0	0	0	0	0	0	0	0	0	0	0	0	0	0
OTU6237	0	0	0	0	0	0	0	0	0	0	0	21	16	18	0	0	9	34	0	14	0	0	0	0	0	0	0	0	0	0	0	0	0	0	0	0	0	0	0	0	0	0	0	0	0	0	0	0	0
OTU6238	0	0	0	0	0	0	0	0	0	0	0	0	0	0	0	0	0	0	0	0	0	0	0	0	0	0	0	0	0	0	0	19	0	0	0	0	0	0	0	0	160	0	0	0	0	0	0	0	0
OTU624	106	0	69	94	8	0	0	64	12	78	7	0	0	0	0	0	7	0	64	4	41	19	87	5	0	47	33	64	4	14	0	31	4	54	69	25	43	42	116	0	0	0	92	2	106	5	5	0	0
OTU6244	0	0	0	0	0	0	0	0	0	0	28	12	21	30	14	0	42	0	0	0	0	0	0	0	0	0	0	0	0	0	0	0	0	0	0	0	0	0	0	0	0	0	0	0	0	0	0	0	0
OTU6247	27	0	10	8	0	0	0	3	0	0	0	0	0	0	0	0	0	0	7	0	5	0	0	0	0	0	0	16	0	0	0	0	0	0	0	0	0	0	0	0	0	0	0	0	0	0	0	0	0
OTU6252	0	0	0	0	0	0	0	0	0	0	0	0	0	0	0	0	0	0	8	0	0	0	0	0	0	0	0	9	0	0	0	0	0	0	0	0	0	0	6	0	0	0	0	0	0	0	0	0	0
OTU6253	0	0	17	0	0	0	0	0	7	0	0	0	0	0	0	0	0	0	0	0	0	0	0	0	0	0	0	0	0	0	0	0	0	0	0	0	0	0	0	0	0	0	0	0	0	0	0	0	0
OTU6255	0	0	0	0	8	0	0	0	0	0	0	0	0	0	0	0	0	0	0	0	0	0	0	0	0	0	0	0	0	0	0	0	0	0	0	0	0	0	0	0	0	0	0	0	0	0	0	0	0
OTU6258	0	0	20	51	9	0	0	0	0	0	0	0	0	0	0	0	0	0	12	0	14	0	0	0	0	14	14	0	10	0	0	0	21	0	0	0	0	0	0	0	0	0	0	0	0	0	0	0	0
OTU6260	0	0	0	0	7	0	0	0	0	0	0	0	0	0	12	0	0	0	0	0	0	0	0	0	0	0	0	0	0	0	0	0	0	0	0	0	0	0	0	0	0	0	0	0	0	0	0	0	0
OTU6264	0	0	0	0	0	0	0	0	0	0	0	0	0	0	0	0	0	18	0	0	0	0	0	0	0	0	0	0	0	0	8	15	0	0	0	29	0	0	0	0	16	0	0	0	0	0	0	8	0
OTU6265	0	0	0	0	35	0	0	0	0	0	0	0	0	0	0	0	0	12	0	0	0	0	0	0	0	0	0	0	0	0	0	0	0	0	0	0	0	0	0	0	0	0	0	0	0	0	0	0	0
OTU6271	17	0	0	0	0	0	0	18	0	10	0	0	0	0	0	0	0	0	0	0	0	0	0	0	0	0	0	0	0	0	0	0	0	0	0	0	0	0	0	0	0	0	0	0	0	0	0	0	0
OTU6272	0	0	0	0	0	0	0	0	0	0	0	0	0	0	0	0	0	0	0	0	0	0	0	0	0	0	0	0	0	0	0	0	0	0	0	0	0	0	0	0	0	0	0	0	0	0	0	0	0
OTU6278	0	0	0	0	0	0	8	0	0	0	0	9	0	0	0	0	0	9	0	0	0	0	0	9	0	0	0	0	0	0	0	14	0	0	0	0	0	0	0	0	0	0	0	0	0	0	0	7	0
OTU6283	0	0	0	0	0	0	0	0	0	0	0	0	0	0	0	0	0	0	0	4	0	0	0	0	0	0	0	0	0	0	0	0	0	0	0	0	0	0	0	0	0	0	0	0	0	5	0	0	0
OTU629	0	0	0	0	0	0	0	38	0	0	9	0	0	0	0	0	0	0	0	0	0	0	0	0	0	0	0	0	0	0	0	0	0	0	0	0	0	0	0	0	0	0	0	0	0	0	0	0	0
OTU6290	12	0	0	19	0	0	0	0	0	5	0	0	0	0	0	0	0	0	6	0	0	0	0	0	0	0	0	10	0	0	0	0	0	0	0	0	0	0	15	0	0	0	14	0	0	0	0	0	0
OTU6291	0	0	0	0	0	0	0	0	0	0	0	0	0	0	0	0	0	0	0	8	0	0	0	0	0	0	0	0	0	0	0	0	0	0	0	0	0	0	0	0	0	0	0	0	0	15	8	13	0
OTU6293	7	0	8	10	0	0	0	17	9	10	0	0	0	0	0	0	0	0	0	0	0	0	0	0	0	0	0	0	0	0	0	0	0	0	0	0	0	0	0	0	0	0	0	0	0	0	0	0	0
OTU6294	0	0	0	0	18	18	0	0	0	0	0	23	30	0	0	0	14	0	0	0	0	0	0	0	0	0	0	0	0	0	17	0	0	0	0	17	0	21	0	0	0	0	0	0	0	0	0	0	0
OTU630	0	0	0	0	32	0	0	0	0	0	0	113	51	33	57	823	27	22	0	9	0	0	0	69	15	5	0	0	73	0	0	0	0	28	0	0	0	0	0	13	22	0	0	0	0	26	73	0	0
OTU6303	0	0	0	0	0	0	0	0	0	0	0	0	0	0	0	0	0	0	0	0	0	0	8	0	0	0	0	0	11	0	0	17	10	14	0	14	8	0	9	0	0	0	45	0	0	0	0	0	18
OTU6304	0	0	11	14	0	0	0	0	0	5	0	0	0	0	0	0	0	0	11	0	11	0	0	0	0	0	0	0	0	4	0	9	0	0	0	0	0	0	0	0	0	0	0	0	0	0	0	0	0
OTU6308	0	0	0	0	9	22	0	0	0	0	0	0	0	0	0	0	105	0	0	0	0	0	0	0	0	0	0	0	0	0	0	0	0	0	0	0	0	0	0	0	0	0	0	0	0	0	0	0	0
OTU6314	0	0	0	0	0	0	0	0	0	0	0	17	35	25	0	0	0	13	0	0	0	0	0	0	9	0	0	0	0	0	0	0	0	0	0	0	0	0	0	0	0	0	0	0	0	0	0	0	0
OTU6317	0	0	14	13	0	0	0	0	0	0	0	0	0	0	0	0	0	0	29	0	23	0	0	0	0	0	0	0	0	0	0	0	0	0	33	0	25	0	13	0	0	0	0	0	0	0	0	0	0
OTU6318	16	0	23	0	0	0	0	0	0	0	0	0	0	0	0	0	0	0	0	0	0	0	0	0	0	0	0	0	0	0	0	0	0	0	0	0	0	0	0	0	0	0	0	0	0	0	0	0	0
OTU6320	19	0	12	0	0	0	0	8	0	39	0	0	0	0	0	0	0	0	15	0	7	0	20	0	0	16	20	0	0	0	0	0	0	0	0	0	0	0	0	0	0	0	6	0	0	0	0	0	0
OTU6323	11	0	30	26	18	0	0	0	0	0	0	0	0	0	0	0	0	0	0	0	0	0	0	0	0	0	0	0	0	0	0	0	0	0	0	0	0	0	0	0	0	0	0	0	0	0	0	0	0
OTU6327	0	0	13	0	0	0	0	0	0	59	0	0	0	0	0	0	0	0	17	0	5	0	26	0	0	20	0	12	0	0	0	9	12	0	0	0	0	0	0	0	0	0	0	0	0	0	0	0	0
OTU6328	0	0	0	0	0	0	0	3	0	4	0	0	0	0	5	0	0	0	0	0	0	0	0	0	0	0	0	8	0	0	4	12	4	0	14	0	7	9	21	5	0	0	11	0	0	0	0	0	0
OTU633	62	0	74	37	0	0	0	37	43	86	0	0	0	0	0	0	0	0	29	0	12	0	22	0	0	42	58	35	0	59	0	25	26	0	12	0	14	0	28	0	0	11	83	8	0	0	0	0	0
OTU6332	0	0	0	0	0	0	0	0	0	0	0	0	0	0	0	0	0	0	0	0	0	0	0	0	0	10	0	0	0	0	0	0	36	0	0	0	0	0	59	0	0	14	0	0	0	0	0	0	0
OTU6333	0	0	0	0	5	3	0	0	0	0	0	4	0	0	7	9	0	0	0	0	0	0	0	6	12	0	0	0	7	0	0	4	0	4	0	6	0	0	0	15	10	0	0	0	0	0	0	0	0
OTU6335	0	0	23	21	0	0	0	7	12	0	0	0	0	0	0	0	0	0	15	0	9	0	0	0	0	10	0	9	0	0	0	0	0	0	0	0	0	0	0	0	0	0	0	0	0	0	0	0	0
OTU6337	0	0	0	0	0	0	0	0	0	0	0	0	0	0	0	0	0	0	0	0	0	14	0	0	0	0	0	0	0	6	0	0	0	0	0	0	22	30	0	0	0	0	0	0	11	11	0	0	0
OTU6338	0	0	0	0	0	0	0	0	0	0	0	24	0	0	0	0	0	5	0	0	0	0	0	0	0	0	0	0	16	0	0	0	0	0	0	0	0	0	0	0	0	0	0	0	0	0	0	0	0
OTU634	12	0	0	450	0	0	0	16	41	0	0	0	0	0	0	0	0	0	31	0	24	33	0	0	0	79	0	90	0	14	24	81	40	31	177	93	215	47	129	24	0	0	164	0	43	65	68	0	0
OTU6339	0	0	0	0	0	0	0	0	0	0	0	0	0	0	0	0	0	0	0	0	0	0	0	0	0	0	0	0	0	0	0	0	0	0	0	0	0	0	0	0	0	0	0	0	0	0	0	0	0
OTU6348	0	0	0	0	9	8	0	0	0	0	0	0	0	0	0	0	35	0	0	0	0	0	0	0	0	0	0	0	0	0	0	0	0	0	0	0	0	0	0	0	0	0	0	0	0	0	0	0	0
OTU635	0	0	0	0	0	0	12	0	0	0	0	0	0	0	13	0	0	0	0	15	0	0	6	0	51	0	0	0	17	0	0	0	0	0	0	0	0	32	0	0	0	0	0	0	0	0	0	0	0
OTU6351	0	0	0	0	0	0	0	0	0	0	0	7	3	21	0	0	10	0	0	0	0	0	0	0	0	0	0	0	0	0	2	0	0	6	0	36	0	0	0	3	0	0	0	0	0	9	5	9	0
OTU6352	0	0	0	0	0	0	0	0	0	0	0	0	0	0	0	0	0	0	0	0	0	0	0	0	0	0	0	0	0	0	0	0	0	0	0	0	0	0	0	0	0	0	0	0	0	0	0	0	0
OTU6354	12	5	10	0	4	0	0	4	0	0	0	0	0	0	0	0	0	0	0	0	0	0	0	0	0	0	0	0	0	0	0	0	0	0	0	0	0	0	0	0	0	0	0	0	0	0	0	0	0
OTU6355	0	0	0	0	0	0	0	0	0	0	0	0	24	0	11	16	9	0	0	0	0	0	0	0	0	0	0	0	15	0	0	0	0	0	0	0	0	13	0	0	14	0	0	0	0	0	0	0	0
OTU6361	0	0	0	0	50	0	0	0	0	0	0	0	0	0	0	0	0	0	0	0	0	0	0	0	0	0	0	0	0	0	0	0	0	0	0	0	0	0	0	0	0	0	0	0	0	0	0	0	0
OTU637	96	0	0	0	0	0	0	333	68	0	0	0	0	0	0	0	0	0	0	0	0	0	0	0	0	74	0	0	0	0	0	0	0	0	0	0	0	0	0	0	0	0	0	0	0	0	0	0	0
OTU6378	0	0	16	8	0	0	0	0	7	5	0	0	0	0	0	0	0	0	14	0	22	0	6	0	0	9	0	8	0	0	0	0	0	0	0	0	0	0	0	0	0	0	0	0	0	0	0	0	0
OTU6379	0	0	8	12	0	0	0	14	0	7	0	0	0	0	0	0	0	0	0	0	0	0	0	0	0	0	0	0	0	0	0	0	0	0	0	0	0	0	0	0	0	0	0	0	0	0	0	0	0
OTU6382	0	0	0	0	0	0	0	0	0	0	0	0	0	0	0	0	0	0	7	0	0	0	0	0	0	0	0	0	0	0	0	0	0	0	32	0	21	0	0	0	0	0	0	0	0	0	0	0	0
OTU6384	21	0	0	0	0	0	0	0	0	0	0	0	0	0	0	0	0	0	0	0	0	0	16	0	0	20	34	0	0	23	0	0	26	0	0	0	0	0	0	0	0	36	0	0	0	0	0	0	0
OTU6385	0	0	0	0	9	0	0	0	0	0	0	0	4	0	12	0	148	0	0	0	0	0	0	0	0	0	0	0	0	0	0	0	0	0	0	0	0	0	0	0	0	0	0	0	0	0	0	0	0
OTU6394	0	0	0	0	0	0	0	0	0	0	0	52	106	52	0	0	37	0	0	0	0	0	0	0	0	0	0	0	0	0	0	0	0	0	0	0	0	0	0	0	0	0	0	0	0	0	0	0	0
OTU6395	0	0	0	0	0	0	0	0	0	0	0	0	0	0	0	0	40	23	0	36	0	10	0	10	10	0	0	0	0	0	0	0	0	33	0	30	0	12	0	0	0	0	0	0	0	0	0	0	0
OTU6403	0	0	0	0	0	0	0	0	0	0	0	0	0	0	0	0	0	9	0	15	0	20	0	5	8	0	0	0	9	0	4	0	0	0	0	0	0	0	0	0	0	0	0	0	0	0	0	0	0
OTU6405	0	0	17	12	0	0	0	0	13	19	0	0	0	0	0	0	0	0	15	0	9	0	0	0	0	53	0	0	0	0	0	0	0	0	0	0	0	0	0	0	0	0	0	0	0	0	0	0	0
OTU6406	14	0	29	0	0	0	0	10	0	0	0	0	0	0	0	0	0	0	0	0	0	0	0	0	0	0	0	0	0	0	0	0	0	0	0	0	0	0	0	0	0	0	0	0	0	0	0	0	0
OTU6408	0	0	0	0	0	0	9	0	0	0	0	0	0	0	0	0	0	0	0	0	0	0	0	15	0	0	0	0	0	0	0	23	0	0	0	0	0	0	0	0	18	0	0	0	0	10	0	0	0
OTU6412	0	0	0	0	13	27	0	0	0	0	0	0	0	0	0	0	0	0	0	0	0	0	0	0	0	0	0	0	18	0	0	13	0	15	0	26	0	0	0	10	13	0	0	0	3	0	0	0	4
OTU6413	0	0	0	0	17	0	0	0	0	0	0	0	0	0	13	7	0	15	0	0	0	0	0	0	0	0	0	0	7	0	0	0	0	0	0	0	0	0	0	0	0	0	0	0	0	0	0	0	0
OTU6417	0	0	0	0	0	0	0	0	0	0	0	0	0	0	0	0	0	0	0	0	0	0	0	0	0	0	0	0	0	0	0	0	0	0	0	0	0	0	0	0	0	0	0	0	0	0	0	0	0
OTU6421	0	0	11	9	0	0	0	31	14	0	0	0	0	0	0	0	0	0	0	0	0	0	0	0	0	0	0	0	0	0	0	0	0	0	0	0	0	0	0	0	0	0	0	0	0	0	0	0	0
OTU6422	0	0	0	0	0	0	0	0	0	0	0	0	0	110	0	0	7	0	0	0	0	0	0	0	0	0	0	0	0	0	0	0	0	0	0	0	0	0	0	0	25	0	0	0	0	0	0	0	0
OTU6423	0	0	0	0	0	0	0	0	0	0	0	0	0	0	0	0	0	0	0	0	0	0	0	0	0	0	0	0	0	0	0	0	0	0	0	0	0	0	0	0	0	0	0	0	0	0	0	0	0
OTU6430	0	4	0	0	0	6	7	0	0	0	0	12	11	7	8	10	3	3	0	4	0	0	0	10	10	0	0	0	9	0	4	19	0	7	0	0	0	0	0	0	4	0	0	0	0	5	0	10	28
OTU6433	0	0	0	0	11	15	0	0	0	0	0	0	0	0	0	0	0	0	0	0	0	0	0	0	0	0	0	0	0	0	0	0	0	0	0	0	0	0	0	0	0	0	0	0	0	0	0	0	0
OTU6443	0	0	0	0	0	0	0	0	0	0	0	15	0	0	0	9	30	0	0	0	0	0	0	0	0	0	0	0	0	0	28	24	0	0	0	0	0	0	0	0	0	0	0	0	0	0	0	39	0
OTU6445	0	0	0	0	0	0	0	0	0	0	0	0	0	0	8	0	0	0	6	0	8	0	0	0	0	0	0	0	0	0	0	0	0	0	0	0	0	0	0	0	0	0	0	0	0	0	0	0	0
OTU6446	0	0	0	18	0	0	0	0	0	0	0	0	0	0	0	0	0	0	8	0	0	0	26	0	0	17	18	0	0	0	0	0	0	0	0	0	0	0	0	0	0	0	0	0	0	0	0	0	0
OTU6447	0	0	0	0	0	0	0	0	0	0	0	9	7	0	0	0	0	0	0	0	0	0	0	0	0	0	0	0	0	0	0	189	0	0	0	0	0	0	0	0	0	0	0	0	0	0	0	0	0
OTU6449	0	0	0	0	0	0	0	0	0	0	0	0	0	0	0	210	0	0	0	0	0	0	0	0	0	0	0	0	0	0	0	0	0	0	0	0	0	0	0	0	0	0	0	0	0	0	0	0	0
OTU6451	0	0	0	9	0	13	0	0	0	0	0	0	0	0	0	0	0	0	0	0	0	0	0	0	0	0	0	0	0	0	0	0	0	0	0	0	0	0	0	0	0	0	0	0	0	0	0	0	0
OTU6456	26	0	0	14	0	0	0	0	0	0	0	0	0	0	0	0	0	0	14	0	0	0	17	0	0	0	29	0	0	0	0	0	0	0	0	0	0	0	0	0	0	0	0	0	0	0	0	0	0
OTU6461	0	0	0	0	0	0	0	0	0	0	0	23	26	28	9	10	15	4	0	10	0	9	0	6	6	0	0	0	0	0	0	0	0	0	0	0	0	0	0	0	0	0	0	0	0	0	0	0	0
OTU6463	0	0	0	0	0	0	0	0	0	0	0	0	0	0	0	0	0	0	0	0	0	0	0	0	0	0	0	0	0	0	0	0	0	0	0	0	0	0	0	0	0	0	0	0	0	0	0	0	0
OTU6466	0	0	0	0	18	0	0	0	0	0	0	0	0	0	0	0	0	0	0	0	0	0	0	0	0	0	0	0	0	0	0	0	0	0	0	0	0	0	0	0	0	0	0	0	0	0	0	0	0
OTU6467	0	0	19	0	0	0	0	0	0	0	0	0	0	0	0	0	0	0	0	0	0	0	0	0	0	0	0	0	0	6	0	11	0	0	0	0	0	0	0	0	0	0	0	0	0	0	0	0	0
OTU6468	14	0	17	0	0	0	0	0	0	0	0	0	0	0	0	0	4	0	11	0	6	0	7	0	0	0	0	10	0	0	0	0	0	0	0	0	0	0	0	0	0	0	11	0	0	0	0	0	15
OTU647	142	0	419	287	97	23	0	110	68	420	0	65	76	140	96	111	110	0	0	0	0	0	0	0	187	0	0	0	0	0	0	0	0	0	0	0	0	0	0	0	0	0	0	0	0	0	0	0	0
OTU6470	14	0	16	20	0	9	6	8	0	5	0	0	0	0	0	0	0	0	0	0	7	0	0	0	0	9	8	8	0	13	0	0	0	0	10	0	6	0	7	0	0	0	0	0	19	0	0	0	5
OTU6472	0	0	0	0	22	13	0	0	0	0	0	11	0	12	0	0	0	16	0	0	0	0	0	0	0	0	0	0	0	0	14	37	0	14	0	0	0	12	0	0	15	0	0	0	0	0	0	21	0
OTU6473	0	0	2	0	0	0	0	0	5	0	0	0	0	0	0	0	0	0	0	0	0	0	5	0	0	0	0	7	0	0	12	10	0	0	11	0	27	0	28	0	0	0	12	0	0	0	0	0	0
OTU6477	0	0	0	0	0	0	0	0	0	0	0	0	0	0	0	0	0	0	0	0	0	0	0	11	0	0	0	0	0	0	0	0	0	0	0	0	0	0	0	0	0	0	0	0	0	0	0	0	0
OTU6480	8	0	0	0	0	0	0	11	6	6	0	0	0	0	0	0	0	0	0	0	0	0	5	0	0	0	0	6	0	0	0	0	0	0	15	0	0	0	10	0	0	0	11	0	0	0	0	0	0
OTU6482	18	0	30	18	0	0	0	0	20	28	0	0	0	0	0	0	0	0	42	0	0	0	0	0	0	0	0	0	0	0	0	22	0	0	13	0	0	0	0	0	0	0	0	0	15	0	0	0	0
OTU6483	0	0	0	0	0	5	0	0	0	0	0	0	0	0	0	0	0	0	19	0	0	0	0	0	0	0	0	0	0	0	0	0	0	22	0	0	0	0	0	0	0	0	0	0	0	0	5	0	0
OTU6484	0	0	0	0	0	0	0	0	0	0	0	0	0	0	11	0	0	0	0	0	0	0	0	0	0	0	0	0	0	0	0	0	0	19	0	11	0	0	0	14	0	0	0	0	0	0	0	0	0
OTU6487	5	7	16	20	8	9	3	13	3	3	2	0	0	0	0	0	5	14	4	5	2	2	0	4	3	0	0	3	14	5	0	19	0	9	0	12	0	9	0	4	10	0	0	0	0	0	0	0	0
OTU6490	7	0	13	18	0	0	0	10	0	0	0	0	0	0	0	0	0	0	6	0	6	0	0	0	0	6	0	0	0	0	0	22	0	0	14	0	17	0	16	0	0	0	0	78	0	0	0	0	11
OTU6497	0	0	0	0	0	0	0	37	0	16	0	0	0	0	0	0	0	0	0	0	0	0	0	0	0	12	0	0	0	31	0	0	15	0	0	0	0	0	0	0	0	0	0	0	0	0	0	0	0
OTU65	266	9	114	91	92	34	0	173	393	139	118	0	0	0	0	0	0	0	0	0	0	0	0	0	0	0	0	0	0	0	0	0	0	0	0	0	0	0	0	0	0	0	0	0	0	0	0	0	0
OTU6504	0	0	0	0	0	0	0	0	0	0	0	0	0	0	0	0	0	0	0	0	0	0	0	0	0	0	0	17	102	0	0	0	0	0	0	0	0	0	0	0	0	0	0	0	0	0	0	0	0
OTU6507	0	0	0	0	0	0	0	0	0	0	0	0	0	0	0	0	0	0	0	0	0	0	0	0	0	0	0	0	0	0	0	0	0	0	0	0	0	0	0	0	0	0	0	0	0	0	0	0	0
OTU6511	0	0	0	0	0	0	0	0	0	0	0	0	0	0	0	0	0	13	21	0	0	0	41	0	0	30	10	11	0	0	0	0	0	0	0	0	0	0	0	0	0	0	0	0	0	0	0	0	0
OTU6517	0	0	8	0	3	0	0	0	0	7	0	0	0	0	0	0	0	0	4	0	0	0	4	0	0	0	0	0	3	0	0	5	0	0	0	0	0	0	0	0	0	0	0	0	0	0	0	0	0
OTU6520	10	0	0	11	0	0	0	20	0	0	0	0	0	0	0	0	0	0	6	0	0	0	0	0	0	9	18	14	0	0	0	15	0	0	3	0	2	0	0	0	0	0	0	0	0	0	0	0	0
OTU6522	0	0	0	0	0	21	32	0	0	0	0	0	0	0	0	16	0	11	0	0	0	0	0	0	22	0	0	0	13	0	0	30	0	16	0	0	0	0	0	13	0	0	0	0	0	0	0	0	0
OTU6524	19	0	21	23	0	0	0	16	11	0	0	0	0	0	0	0	0	0	0	0	8	0	0	0	0	15	7	14	0	0	0	0	0	0	0	0	0	0	0	0	0	0	0	0	0	0	0	0	0
OTU6527	0	0	0	0	0	0	0	0	0	0	0	18	11	22	0	0	0	0	0	11	0	10	0	13	0	0	0	0	0	0	0	0	0	0	0	0	0	0	0	0	0	0	0	0	0	0	0	0	0
OTU6528	0	0	0	0	0	0	0	0	0	0	0	15	0	15	0	0	0	0	0	0	0	0	0	0	0	0	0	0	0	0	0	0	0	0	0	0	0	0	0	0	0	0	0	0	0	0	0	0	0
OTU653	111	0	79	38	0	74	0	35	38	113	139	0	0	0	0	0	0	0	19	0	0	0	23	0	0	0	74	14	185	41	0	0	51	0	0	0	0	0	0	0	0	57	30	19	164	0	0	0	0
OTU6530	0	0	0	0	18	30	33	0	0	0	0	0	0	0	0	0	0	0	0	0	0	0	0	0	0	0	0	0	0	0	19	26	0	0	0	15	0	21	0	0	0	0	0	0	0	0	0	0	0
OTU6537	6	0	0	0	0	0	0	0	0	0	0	0	0	0	0	0	0	0	0	0	0	0	0	0	0	0	0	0	0	0	0	0	0	0	0	0	0	0	0	0	0	0	0	0	0	0	0	0	0
OTU6539	0	0	8	9	0	0	5	0	0	0	0	0	0	0	0	0	0	0	43	0	18	0	7	0	0	0	0	0	0	0	0	0	0	0	0	0	0	0	0	0	0	0	0	0	0	0	0	0	0
OTU6544	9	0	13	14	0	0	0	0	0	10	0	0	0	0	0	0	0	0	9	0	0	0	6	0	0	9	6	11	0	0	0	11	0	0	0	0	0	0	0	0	0	0	0	0	0	0	0	0	0
OTU6546	0	0	0	0	0	0	0	0	0	0	0	0	0	0	0	0	0	16	0	0	0	0	0	0	0	0	0	0	0	0	0	20	0	0	0	0	0	16	0	0	0	0	0	0	0	0	10	23	0
OTU6548	0	0	0	0	8	0	0	0	0	0	0	0	0	0	0	0	0	0	0	0	0	0	0	0	0	0	0	0	11	0	0	0	0	0	0	0	0	0	0	0	0	0	0	0	0	0	0	0	0
OTU6551	5	0	7	12	0	0	0	0	0	0	0	0	0	0	0	0	0	0	0	0	0	0	0	0	0	0	0	0	0	0	0	0	0	0	0	0	0	0	0	0	0	0	0	0	0	0	0	0	0
OTU6553	0	0	0	0	0	0	0	0	0	0	0	0	0	0	0	0	0	0	0	0	0	0	0	0	0	0	0	0	0	0	0	0	0	0	0	0	0	0	0	0	0	0	0	0	0	0	0	0	0
OTU6554	0	0	0	0	0	0	0	23	0	0	0	0	0	0	0	0	0	0	0	0	0	0	0	0	0	0	0	0	0	0	0	0	0	0	0	0	0	0	0	0	0	0	0	0	0	0	0	0	0
OTU656	27	9	37	89	38	47	0	19	19	12	73	11	6	25	60	60	95	0	0	0	0	0	0	0	0	0	0	0	0	0	0	0	0	0	0	0	0	0	0	0	0	0	0	0	0	0	0	0	0
OTU6568	0	0	0	0	0	0	0	0	0	0	0	11	26	17	0	0	0	0	0	0	0	13	0	0	0	0	0	0	0	0	6	0	0	26	0	21	0	0	0	18	0	0	0	0	0	0	0	0	0
OTU657	0	0	0	0	37	0	0	0	0	0	0	19	37	51	28	0	49	0	0	27	0	31	0	0	19	0	0	0	0	0	30	24	0	33	0	48	0	34	0	66	0	0	0	63	68	0	0	0	0
OTU6575	15	0	21	19	0	0	0	0	0	17	0	0	0	0	0	0	0	0	0	0	0	0	0	0	0	0	0	0	0	0	0	0	0	0	0	0	0	0	0	0	0	0	0	0	0	0	0	0	0
OTU6582	11	0	9	0	27	0	0	28	0	0	10	0	0	30	15	18	0	0	0	0	0	0	0	0	0	0	0	0	0	0	0	0	0	0	0	0	0	0	0	0	0	0	0	0	0	0	0	0	0
OTU6590	0	5	0	0	0	0	0	0	0	0	0	14	12	0	0	0	0	0	0	0	0	0	0	0	0	0	0	0	0	0	0	0	0	0	0	0	0	0	0	0	0	0	0	0	0	0	0	0	0
OTU6592	0	0	0	0	0	7	6	0	0	0	0	2	3	2	4	7	5	1	0	1	0	11	0	0	0	0	0	0	4	0	7	23	0	2	0	1	0	1	0	10	0	0	0	0	0	12	1	1	6
OTU6593	0	0	0	0	0	0	0	0	0	0	0	0	0	0	0	0	0	0	0	0	0	0	0	0	0	0	0	0	0	0	0	0	0	0	0	0	0	0	0	0	0	0	0	0	0	0	0	0	0
OTU6594	0	0	0	0	13	0	0	0	0	0	0	0	0	0	0	0	0	0	0	0	0	0	0	0	0	0	0	0	0	0	0	0	0	0	0	0	0	0	0	0	0	0	0	0	0	0	0	0	0
OTU6598	0	0	0	0	0	0	0	0	0	0	0	0	0	0	0	0	0	0	0	0	0	0	0	0	0	18	0	0	0	0	0	0	0	0	0	0	0	0	0	0	0	0	0	0	0	0	0	0	0
OTU66	0	39	0	26	72	74	0	0	63	0	0	113	161	232	67	134	0	0	0	0	0	0	0	0	0	0	0	0	0	0	0	0	0	0	0	0	0	0	0	0	0	0	0	0	0	0	0	0	0
OTU660	0	0	0	0	39	23	17	0	0	0	0	0	0	19	0	0	21	0	0	26	0	0	0	23	27	0	0	0	0	0	67	31	0	41	0	31	0	46	0	46	66	0	0	0	155	18	0	42	82
OTU6600	0	0	0	0	0	0	0	0	0	0	0	0	0	0	0	0	0	0	0	0	0	0	0	0	0	0	0	0	0	0	0	17	0	0	0	0	0	28	0	0	0	0	0	0	0	21	26	0	33
OTU6606	18	0	0	14	0	0	0	0	26	0	0	0	0	0	0	0	0	0	0	0	0	0	0	0	0	0	0	0	0	0	0	0	0	0	0	0	0	0	0	0	0	0	0	0	0	0	0	0	0
OTU6607	0	0	0	0	13	0	0	0	0	0	0	0	6	0	0	26	12	0	0	0	0	0	0	11	0	0	0	0	0	0	0	0	0	24	0	19	0	0	0	0	0	0	0	0	0	0	0	24	0
OTU661	52	0	16	0	0	0	0	97	0	0	0	0	0	0	0	0	0	0	0	0	0	0	0	0	0	0	0	0	0	0	0	0	0	0	0	0	0	0	0	0	0	0	0	0	0	0	0	0	0
OTU6609	0	0	0	0	0	0	0	0	0	0	0	10	15	13	0	0	0	7	0	36	0	11	0	0	0	0	0	0	0	0	0	0	0	0	0	0	0	0	0	0	9	0	0	0	0	0	0	0	0
OTU6610	0	0	0	0	0	0	0	0	0	0	0	0	0	6	0	15	0	0	0	0	0	0	0	0	0	0	0	0	0	0	0	7	0	5	0	12	0	8	0	9	0	0	0	0	0	0	0	11	0
OTU6611	0	0	0	0	0	0	0	0	0	0	0	0	0	0	0	18	0	0	0	0	0	0	0	0	0	0	0	0	16	0	0	0	0	10	0	0	0	0	0	0	0	0	0	0	0	0	0	0	0
OTU6615	0	0	0	0	0	0	0	0	0	0	0	10	22	22	20	0	6	16	0	10	0	0	0	11	6	0	0	0	0	0	0	8	0	0	0	0	0	0	0	0	0	0	0	0	0	0	0	0	0
OTU6622	0	0	0	8	0	0	0	0	0	0	0	0	0	0	0	0	0	0	22	0	45	0	16	0	0	9	0	0	0	0	0	16	0	0	0	0	0	0	0	0	0	0	0	0	0	0	0	0	0
[truncated: 660 more rows]
[truncated: 103 more columns]

## Sheet: Legend
Legend
hL	hours after LPS injection
hC	hours after Calving, post partum
-/m	days before calving (antepartum/ap)
+/p	days after calving (postpartum/pp)
Here included are the 12 time points -42, -14, 12hC, 24hC, 72hC, +14, +100, 12hL, 24hL, 72hL, +118 and +126. There are 3 irrgular time points included as well -3, +42 and +110.
The data include reads per OTU within the specific sample.
71 rumen fluid samples
77 duodenal samples
In total 148 samples
Sample ID	Animal	Group (Carnitine CAR/Controll CON)	Matrix (RUM/DUO)	Matrix_long	Time point	Time point_recode
00112hLD	001	Controll	DUO	Duodenum	12hL	12hL
00124hKD	001	Controll	DUO	Duodenum	24hK	24hC
00124hLD	001	Controll	DUO	Duodenum	24hL	24hL
00172hLD	001	Controll	DUO	Duodenum	72hL	72hL
001m14D	001	Controll	DUO	Duodenum	m14	-14
001m42D	001	Controll	DUO	Duodenum	m42	-42
001p100D	001	Controll	DUO	Duodenum	p100	+100
001p118D	001	Controll	DUO	Duodenum	p118	+118
001p126D	001	Controll	DUO	Duodenum	p126	+126
001p14D	001	Controll	DUO	Duodenum	p14	+14
00112hLR	001	Controll	RUM	Rumen	12hL	12hL
00124hLR	001	Controll	RUM	Rumen	24hL	24hL
00172hLR	001	Controll	RUM	Rumen	72hL	72hL
001m14R	001	Controll	RUM	Rumen	m14	-14
001m42R	001	Controll	RUM	Rumen	m42	-42
001p100R	001	Controll	RUM	Rumen	p100	+100
001p118R	001	Controll	RUM	Rumen	p118	+118
001p126R	001	Controll	RUM	Rumen	p126	+126
001p14R	001	Controll	RUM	Rumen	p14	+14
03912hKD	039	Controll	DUO	Duodenum	12hK	12hC
03924hKD	039	Controll	DUO	Duodenum	24hK	24hC
03972hKD	039	Controll	DUO	Duodenum	72hK	72hC
039m14D	039	Controll	DUO	Duodenum	m14	-14
039m42D	039	Controll	DUO	Duodenum	m42	-42
039p14D	039	Controll	DUO	Duodenum	p14	+14
039m14R	039	Controll	RUM	Rumen	m14	-14
039m42R	039	Controll	RUM	Rumen	m42	-42
039p14R	039	Controll	RUM	Rumen	p14	+14
24512hKD	245	Controll	DUO	Duodenum	12hK	12hC
24512hLD	245	Controll	DUO	Duodenum	12hL	12hL
24524hKD	245	Controll	DUO	Duodenum	24hK	24hC
24524hLD	245	Controll	DUO	Duodenum	24hL	24hL
24572hKD	245	Controll	DUO	Duodenum	72hK	72hC
24572hLD	245	Controll	DUO	Duodenum	72hL	72hL
245m14D	245	Controll	DUO	Duodenum	m14	-14
245m42D	245	Controll	DUO	Duodenum	m42	-42
245p100D	245	Controll	DUO	Duodenum	p100	+100
245p118D	245	Controll	DUO	Duodenum	p118	+118
245p126D	245	Controll	DUO	Duodenum	p126	+126
245p14D	245	Controll	DUO	Duodenum	p14	+14
24512hKR	245	Controll	RUM	Rumen	12hK	12hC
24524hKR	245	Controll	RUM	Rumen	24hK	24hC
24572hKR	245	Controll	RUM	Rumen	72hK	72hC
245m14R	245	Controll	RUM	Rumen	m14	-14
245p100R	245	Controll	RUM	Rumen	p100	+100
245p14R	245	Controll	RUM	Rumen	p14	+14
24512hLR	245	Controll	RUM	Rumen	12hL	12hL
24524hLR	245	Controll	RUM	Rumen	24hL	24hL
24572hLR	245	Controll	RUM	Rumen	72hL	72hL
245p118R	245	Controll	RUM	Rumen	p118	+118
245p126R	245	Controll	RUM	Rumen	p126	+126
245m42R	245	Controll	RUM	Rumen	m42	-42
24812hLD	248	Controll	DUO	Duodenum	12hL	12hL
248m14D	248	Controll	DUO	Duodenum	m14	-14
248m42D	248	Controll	DUO	Duodenum	m42	-42
248p100D	248	Controll	DUO	Duodenum	p100	+100
24812hKR	248	Controll	RUM	Rumen	12hK	12hC
24812hLR	248	Controll	RUM	Rumen	12hL	12hL
24824hKR	248	Controll	RUM	Rumen	24hK	24hC
248m14R	248	Controll	RUM	Rumen	m14	-14
248m42R	248	Controll	RUM	Rumen	m42	-42
248p100R	248	Controll	RUM	Rumen	p100	+100
30412hKD	304	Carnitine	DUO	Duodenum	12hK	12hC
30412hLD	304	Carnitine	DUO	Duodenum	12hL	12hL
30424hKD	304	Carnitine	DUO	Duodenum	24hK	24hC
30424hLD	304	Carnitine	DUO	Duodenum	24hL	24hL
30472hKD	304	Carnitine	DUO	Duodenum	72hK	72hC
30472hLD	304	Carnitine	DUO	Duodenum	72hL	72hL
304m14D	304	Carnitine	DUO	Duodenum	m14	-14
304m42D	304	Carnitine	DUO	Duodenum	m42	-42
304p100D	304	Carnitine	DUO	Duodenum	p100	+100
304p118D	304	Carnitine	DUO	Duodenum	p118	+118
304p126D	304	Carnitine	DUO	Duodenum	p126	+126
304p14D	304	Carnitine	DUO	Duodenum	p14	+14
30424hKR	304	Carnitine	RUM	Rumen	24hK	24hC
30424hLR	304	Carnitine	RUM	Rumen	24hL	24hL
30472hKR	304	Carnitine	RUM	Rumen	72hK	72hC
30472hLR	304	Carnitine	RUM	Rumen	72hL	72hL
304p118R	304	Carnitine	RUM	Rumen	p118	+118
304p126R	304	Carnitine	RUM	Rumen	p126	+126
304p14R	304	Carnitine	RUM	Rumen	p14	+14
304m42R	304	Carnitine	RUM	Rumen	m42	-42
30624hKD	306	Carnitine	DUO	Duodenum	24hK	24hC
30672hKD	306	Carnitine	DUO	Duodenum	72hK	72hC
306m14D	306	Carnitine	DUO	Duodenum	m14	-14
306m42D	306	Carnitine	DUO	Duodenum	m42	-42
30612hLD	306	Carnitine	DUO	Duodenum	12hL	12hL
30624hLD	306	Carnitine	DUO	Duodenum	24hL	24hL
30672hLD	306	Carnitine	DUO	Duodenum	72hL	72hL
306p100D	306	Carnitine	DUO	Duodenum	p100	+100
306p118D	306	Carnitine	DUO	Duodenum	p118	+118
306p126D	306	Carnitine	DUO	Duodenum	p126	+126
30612hLR	306	Carnitine	RUM	Rumen	12hL	12hL
30624hKR	306	Carnitine	RUM	Rumen	24hK	24hC
30624hLR	306	Carnitine	RUM	Rumen	24hL	24hL
30672hKR	306	Carnitine	RUM	Rumen	72hK	72hC
30672hLR	306	Carnitine	RUM	Rumen	72hL	72hL
306m14R	306	Carnitine	RUM	Rumen	m14	-14
306m42R	306	Carnitine	RUM	Rumen	m42	-42
306p100R	306	Carnitine	RUM	Rumen	p100	+100
306p118R	306	Carnitine	RUM	Rumen	p118	+118
306p126R	306	Carnitine	RUM	Rumen	p126	+126
32912hKD	329	Carnitine	DUO	Duodenum	12hK	12hC
32912hLD	329	Carnitine	DUO	Duodenum	12hL	12hL
32924hKD	329	Carnitine	DUO	Duodenum	24hK	24hC
32924hLD	329	Carnitine	DUO	Duodenum	24hL	24hL
32972hLD	329	Carnitine	DUO	Duodenum	72hL	72hL
329m42D	329	Carnitine	DUO	Duodenum	m42	-42
329p100D	329	Carnitine	DUO	Duodenum	p100	+100
329p118D	329	Carnitine	DUO	Duodenum	p118	+118
329p126D	329	Carnitine	DUO	Duodenum	p126	+126
32912hLR	329	Carnitine	RUM	Rumen	12hL	12hL
32924hKR	329	Carnitine	RUM	Rumen	24hK	24hC
32972hKR	329	Carnitine	RUM	Rumen	72hK	72hC
32972hLR	329	Carnitine	RUM	Rumen	72hL	72hL
329m42R	329	Carnitine	RUM	Rumen	m42	-42
329p118R	329	Carnitine	RUM	Rumen	p118	+118
329p126R	329	Carnitine	RUM	Rumen	p126	+126
333m42D	333	Carnitine	DUO	Duodenum	m42	-42
33312hKD	333	Carnitine	DUO	Duodenum	12hK	12hC
33312hLD	333	Carnitine	DUO	Duodenum	12hL	12hL
33324hKD	333	Carnitine	DUO	Duodenum	24hK	24hC
33324hLD	333	Carnitine	DUO	Duodenum	24hL	24hL
33372hKD	333	Carnitine	DUO	Duodenum	72hK	72hC
33372hLD	333	Carnitine	DUO	Duodenum	72hL	72hL
333m14D	333	Carnitine	DUO	Duodenum	m14	-14
333p100D	333	Carnitine	DUO	Duodenum	p100	+100
333p118D	333	Carnitine	DUO	Duodenum	p118	+118
333p126D	333	Carnitine	DUO	Duodenum	p126	+126
333p14D	333	Carnitine	DUO	Duodenum	p14	+14
33312hLR	333	Carnitine	RUM	Rumen	12hL	12hL
33324hKR	333	Carnitine	RUM	Rumen	24hK	24hC
33324hLR	333	Carnitine	RUM	Rumen	24hL	24hL
33372hKR	333	Carnitine	RUM	Rumen	72hK	72hC
333m14R	333	Carnitine	RUM	Rumen	m14	-14
333m42R	333	Carnitine	RUM	Rumen	m42	-42
333p100R	333	Carnitine	RUM	Rumen	p100	+100
333p14R	333	Carnitine	RUM	Rumen	p14	+14
33372hLR	333	Carnitine	RUM	Rumen	72hL	72hL
333p118R	333	Carnitine	RUM	Rumen	p118	+118
333p126R	333	Carnitine	RUM	Rumen	p126	+126
03924hKR	039	Controll	RUM	Rumen	24hK	24hC
03972hKR	039	Controll	RUM	Rumen	72hK	72hC
