# Supplementary material for: Cow’s microbiome from antepartum to postpartum: A long-term study covering two physiological challenges
Source: Front Microbiol. 2022 Nov 16;13:1000750. doi: 10.3389/fmicb.2022.1000750 (PMC9709127; doi:10.3389/fmicb.2022.1000750)
Supplement: Supplementary file 2 [file Table_2.XLSX]

## Sheet: Phyla_Rumen
Supplementary Data 2
Phyla Rumen
Relative abundance (%) irrespective of timepoints.
ID	001m42P	039m42P	248m42P	306m42P	329m42P	333m42P	245m42P	304m42P		001m14P	039m14P	245m14P	248m14P	306m14P	333m14P		24512hKP	24812hKP		03924hKP	24524hKP	24824hKP	30424hKP	30624hKP	32924hKP	33324hKP		03972hKP	24572hKP	30472hKP	30672hKP	32972hKP	33372hKP		001p14P	039p14P	245p14P	304p14P	333p14P		001p100P	245p100P	248p100P	306p100P	333p100P		00112hLP	24512hLP	24812hLP
Animal	001	039	248	306	329	333	245	304		001	039	245	248	306	333		245	248		039	245	248	304	306	329	333		039	245	304	306	329	333		001	039	245	304	333		001	245	248	306	333		001	245	248
Time point	-42	-42	-42	-42	-42	-42	-42	-42		-14	-14	-14	-14	-14	-14		12hC	12hC		24hC	24hC	24hC	24hC	24hC	24hC	24hC		72hC	72hC	72hC	72hC	72hC	72hC		+14	+14	+14	+14	+14		+100	+100	+100	+100	+100		12hL	12hL	12hL
Phyla
Actinobacteria	9.53474	6.03951	0.633441	1.25989	0.581604	4.90024	0.629418	0.808533		8.86004	1.91388	0.945086	1.34869	1.44974	2.7388		2.72112	6.7477		1.24016	1.20938	1.30854	2.36756	2.38275	3.29515	9.00839		1.16612	44.6168	15.8741	20.6925	15.8249	36.7479		17.7862	3.58399	47.2764	7.84775	20.1688		12.6742	13.3393	7.36888	9.92507	5.24424		3.2225	0.860389	3.63208
Bacteroidetes	55.3536	49.919	61.0135	68.4265	55.5683	55.7861	52.7452	48.9678		50.4575	53.753	61.8321	55.5326	65.2109	49.9408		56.4026	42.9933		58.6326	45.5674	46.0193	48.4851	48.566	38.9569	44.9319		30.4378	21.2309	43.2021	43.018	50.5578	24.3946		63.3194	45.5703	7.63368	55.0116	24.818		67.4528	41.7413	63.3036	60.4654	50.3793		62.9473	42.4015	53.4591
Candidatus Saccharibacteria	1.28412	2.96308	0.370503	0.370875	0.509801	1.21309	0.687518	0.636504		1.29105	3.06519	0.722713	0.68419	1.0589	2.1978		1.39486	1.40133		2.95482	2.36618	0.844812	1.13389	0.254585	0.809164	4.29102		1.21554	3.52172	1.33971	0.304301	1.09872	0.92854		0.0340977	2.57913	0.112444	0.414668	2.23362		0.908246	2.14861	0.121872	0.429233	2.0764		0.959508	1.52588	1.19497
Fibrobacteres	0	0	10.4996	0	0	0	7.4465	13.7881		0	0	0	4.8484	0	0		0	0.943756		0	0	1.69421	3.17943	0	0	0		0	0	0.441664	0	0	0		0	0	0	0.148538	0		0	0	0.76605	0	0		0	6.55036	3.00839
Firmicutes	23.3251	26.5544	13.9058	14.8623	16.0192	26.7518	18.5436	24.256		30.2476	29.2165	13.1571	17.7249	16.3061	37.1936		33.751	34.1595		33.5598	46.1563	16.3682	25.3991	15.2313	55.8421	33.9706		64.1961	30.0688	25.9109	27.2518	30.1979	35.6262		17.2875	44.5654	43.5907	34.4175	49.6691		16.8077	36.504	22.7203	24.3383	37.2954		29.099	16.7134	23.6845
Proteobacteria	5.93672	9.42358	5.53364	6.30488	22.8549	7.75738	7.92098	7.41442		4.97269	6.71352	11.724	7.88541	7.55317	3.33052		2.59764	7.83683		2.04896	2.05069	24.146	13.262	29.3806	0.506946	3.39706		0.681886	0.293476	8.19286	2.45131	1.33976	0.609122		0.204586	1.85899	0	0.476559	0		0.175457	0.537153	0.452666	0.726684	0.106482		0.543117	18.1252	1.65094
Spirochaetes	0	0	0.657344	0.938097	0.538522	0	0.968335	0		0	0	1.37748	2.72691	1.20887	0		0	1.09787		0	0	2.72268	1.86411	0.787621	0.136485	0		0	0	1.03423	0.649175	0.667078	0		0	0	0	0	0		0	0	0.0130577	0.55725	0		0	2.57641	1.41509
SR1	1.37717	1.73251	1.26688	1.29261	0.919078	1.78771	1.1039	0.91175		0.943463	1.64474	1.29718	1.00906	0.581712	1.80896		1.09302	0.525898		0.345088	1.95604	0.886134	0.793723	0.278452	0	1.70541		0.0889416	0.243166	0.283401	0.0439546	0	0.698262		0.00852442	0	0	0.256847	0.148908		0.0928888	3.02149	0.326442	0.240973	1.19792		0.500875	2.02976	0.990566
Tenericutes	0.806452	1.29534	0.699175	0.6054	0.0861636	0.175579	1.72364	0.249441		1.4684	1.92883	2.16814	1.62926	0.977095	0.676247		0.653983	1.0367		0.560768	0	1.35445	0.775581	0.990493	0.0633683	0.412598		1.32424	0	1.11152	2.62713	0.100903	0.638835		0	0.267962	0	0.547733	0.529451		0.0670864	0.134288	0.661589	1.36677	0.425928		0.0724157	2.04402	1.13732
Unclassified Bacteria	2.33871	2.07254	5.4201	5.86856	2.92238	1.62809	8.23085	2.93308		1.62446	1.62978	6.65884	6.55149	5.65352	2.11327		1.2851	3.20305		0.657824	0.694079	4.65565	2.64423	2.10828	0.389959	2.04924		0.889416	0.0251551	2.6095	2.96186	0.190594	0.356559		1.35965	1.57428	1.38681	0.878849	2.43216		1.75457	0.402865	4.19151	1.81483	2.60881		2.58283	6.98769	9.7065
Elusimicrobia	0	0	0	0	0	0	0	0		0	0	0	0.0590667	0	0		0	0.0309819		0	0	0	0	0	0	0		0	0	0	0	0	0		0	0	0	0	0		0.0670864	2.17099	0.0739935	0.135547	0.665513		0.0724157	0.137852	0.120545
Chloroflexi	0	0	0	0	0	0	0	0		0	0.134569	0	0	0	0		0.100613	0.0150937		0	0	0	0.0498911	0	0	0.233806		0	0	0	0	0	0		0	0	0	0	0		0	0	0	0	0		0	0	0
Verrucomicrobia	0.0434243	0	0	0.0490864	0	0	0	0		0	0	0	0	0	0		0	0.00794407		0	0	0	0.0453556	0.0198894	0	0		0	0	0	0	0.0224228	0		0	0	0	0	0		0	0	0	0	0		0	0.0475353	0
Synergistetes	0	0	0	0	0	0	0	0.0344056		0.13478	0	0.117364	0	0	0		0	0		0	0	0	0	0	0	0		0	0	0	0	0	0		0	0	0	0	0		0	0	0	0	0		0	0	0
Lentisphaerae	0	0	0	0.0218162	0	0	0	0		0	0	0	0	0	0		0	0		0	0	0	0	0	0	0		0	0	0	0	0	0		0	0	0	0	0		0	0	0	0	0		0	0	0
Fusobacteria	0	0	0	0	0	0	0	0		0	0	0	0	0	0		0	0		0	0	0	0	0	0	0		0	0	0	0	0	0		0	0	0	0	0		0	0	0	0	0		0	0	0
[truncated: 33 more columns]

## Sheet: Phyla_Duodenum
Supplementary Data 2
Phyla Duodenum
Relative abundance (%) irrespective of timepoints.
ID	001m42D	333m42D	039m42D	245m42D	248m42D	304m42D	306m42D	329m42D		001m14D	039m14D	245m14D	248m14D	304m14D	306m14D	333m14D		03912hKD	24512hKD	30412hKD	32912hKD	33312hKD		00124hKD	03924hKD	24524hKD	30424hKD	30624hKD	32924hKD	33324hKD		03972hKD	24572hKD	30472hKD	30672hKD	33372hKD		001p14D	039p14D	245p14D	304p14D	333p14D		001p100D	245p100D	248p100D	304p100D	306p100D	329p100D
Animal	001	333	039	245	248	304	306	329		001	039	245	248	304	306	333		039	245	304	329	333		001	039	245	304	306	329	333		039	245	304	306	333		001	039	245	304	333		001	245	248	304	306	329
Time point	-42	-42	-42	-42	-42	-42	-42	-42		-14	-14	-14	-14	-14	-14	-14		12hC	12hC	12hC	12hC	12hC		24hC	24hC	24hC	24hC	24hC	24hC	24hC		72hC	72hC	72hC	72hC	72hC		+14	+14	+14	+14	+14		+100	+100	+100	+100	+100	+100
Phyla
Actinobacteria	7.23868	1.37278	0.978142	1.42375	10.0871	1.18206	1.28261	0.691661		2.89592	2.20786	2.20377	3.35845	4.40378	5.03483	2.89038		0.939148	1.82598	8.08771	6.56157	10.0455		2.58985	1.21002	0.918701	7.13092	17.8856	2.47582	7.38809		0.882816	28.2159	13.7425	34.1122	19.0226		3.16005	6.6084	7.99877	47.3072	5.99612		5.93747	5.76998	15.8322	24.2901	3.84662	5.1091
Bacteroidetes	45.8577	45.9408	43.7486	40.8323	32.0162	35.4035	42.9821	43.6847		40.5083	41.0703	35.9779	35.2207	31.0376	36.8486	50.784		47.7482	40.012	30.5875	38.8302	43.5776		25.5946	44.2336	41.7569	31.1478	31.5114	39.1151	43.1685		43.269	26.2065	25.9901	28.6469	41.5619		43.5957	48.9867	51.2183	2.02232	58.3266		40.9023	55.9348	27.4367	28.5648	39.4786	58.1739
Fibrobacteres	3.9643	0	8.48634	14.4474	0.0313362	0	0	7.52181		9.22372	8.71251	8.34358	0	0	0	0		7.84271	5.48793	0	2.26182	0		0.0396406	6.71286	3.42311	0	0	0	0		3.13565	2.5557	0	0	0		0.690734	6.25242	1.62443	0	0		1.04606	0.0678821	0.384328	0	0.978568	0
Firmicutes	28.21	42.1065	24.1475	31.7879	48.7152	54.3746	52.5871	17.9753		25.8428	34.1158	41.5847	52.4543	54.7255	54.9599	30.3996		32.2386	33.2169	54.8377	35.8739	28.058		57.3115	37.6312	31.8399	53.3837	48.4219	36.134	21.9696		41.9759	32.6413	53.3099	36.0924	31.3247		27.6823	28.9888	31.8614	49.4797	24.9921		25.8891	33.9119	49.7598	46.7747	30.2921	27.9076
Proteobacteria	8.00526	8.11834	17.2732	6.10569	5.57784	5.91997	0.408104	21.0799		12.8285	6.41675	7.04182	2.60495	5.51981	0	6.86466		5.57996	7.14428	4.24881	12.9815	8.57143		3.73062	4.579	12.2577	4.80483	0	18.0237	8.33009		7.16876	5.39064	4.38439	0	3.3665		18.9531	4.91665	1.956	0.257483	0.613		20.5616	0.766098	0.928793	0.200617	17.189	1.34524
Spirochaetes	1.12796	0	0.923497	0	0	0	0	1.289		1.57331	3.05067	0	0	0	0	2.34121		1.02702	0	0	0.891021	2.07867		0	1.06944	0	0	0	0.938357	1.34683		0.575113	0	0	0	1.13259		0.0673887	0.454658	0	0	1.33169		0.518608	0	0	0	1.22502	0.699103
SR1	0.476373	0.686391	0.846995	1.06781	0.576586	0	0.757907	1.10823		0.687241	0.65667	1.15826	0.925727	0.874724	0.943479	0.585302		0.483304	2.08541	0.605114	0.196482	0.73706		0.0792812	0.507104	1.4221	0.625136	1.00077	0.101054	0.435967		0.157515	0.248892	0.596564	0.435644	0.513109		0	0.0211469	0.552614	0	0.0669368		0.0677726	0.392746	0.0640547	0	0.389011	0
Tenericutes	1.71932	0.52071	0.579235	1.11344	0.7364	0.755741	0	0.856716		1.53441	0.641158	1.19926	1.15178	0.914941	0	1.32235		0.411907	0.349232	0	0.726525	0.546584		0.101304	0.155646	0.780267	0	0	1.47972	0.435967		0.575113	0.965216	0	0	0.519367		4.24067	0.176224	2.29528	0	1.89537		0.441995	0.00969744	0.0747304	0	1.88707	3.30485
Unclassified Bacteria	2.58994	0.852071	2.43169	2.58282	1.75483	2.13158	1.98222	5.07742		4.52974	2.04757	2.27552	3.39074	1.47798	2.08095	4.01041		3.21287	9.27958	1.00202	1.39822	4.37267		1.96001	3.16815	6.84621	1.48288	0.66718	1.19099	15.0019		2.08066	2.51927	0.905628	0.712871	2.15256		1.61011	3.11916	2.13335	0.933376	6.40479		4.3404	2.11889	4.96424	0.169753	4.20422	3.21305
Verrucomicrobia	0	0	0	0	0	0	0	0.0471587		0	0.0361944	0	0	0	0	0		0	0	0	0.0502627	0.057971		0	0	0	0	0	0	0		0	0	0	0	0		0	0	0	0	0		0.0206265	0	0	0	0.021746	0
Synergistetes	0	0	0.26776	0.282924	0	0	0	0.306531		0.194502	0.196484	0	0	0	0	0.224005		0	0.369188	0	0.159927	0.231884		0	0.266104	0.515983	0	0	0.23098	0		0	0.182116	0	0	0.162693		0	0	0.0873901	0	0		0	0	0	0	0	0
Chloroflexi	0.235449	0.189349	0.163934	0.127772	0.0689396	0	0	0.0471587		0	0.0775595	0	0.247578	0	0	0.0505817		0	0.0598683	0	0	0		0	0	0	0	0	0	0.28805		0.0476208	0	0	0	0.150178		0	0.0105734	0.120804	0	0		0	0	0	0	0	0
Lentisphaerae	0.0109511	0	0	0	0.0376034	0	0	0		0.0172891	0	0	0.118407	0	0	0.0361298		0	0	0	0	0		0	0	0	0	0	0	0		0	0	0	0	0		0	0	0.0205624	0	0		0.0206265	0	0	0	0	0
Fusobacteria	0.383289	0	0	0	0	0	0	0.180775		0.064834	0.103413	0	0	0.0502715	0	0.0794855		0.170255	0	0.0130132	0.0182774	0.165631		8.5932	0	0.0880946	0	0	0.0216544	1.44025		0	0	0	0	0		0	0	0	0	0		0	0	0	0	0	0
Elusimicrobia	0	0	0	0	0.0501379	0	0	0		0	0	0	0	0	0	0		0	0	0	0	0		0	0	0	0	0	0	0		0	0	0	0	0		0	0	0	0	0		0.0176798	0.552754	0.149461	0	0.118395	0.0564932
Candidatus Saccharibacteria	0.180693	0.213018	0.153005	0.228165	0.347832	0.232536	0	0.133616		0.0994122	0.667011	0.215252	0.527449	0.995375	0.132263	0.411879		0.346002	0.169627	0.618127	0.0502627	1.55694		0	0.466938	0.151019	1.42473	0.513215	0.288725	0.194628		0.131873	1.07449	1.07094	0	0.0938615		0	0.465231	0.131085	0	0.373437		0.235731	0.475175	0.40568	0	0.369681	0.190665
[truncated: 39 more columns]

## Sheet: Families_Rumen
Supplementary Data 2
Families Rumen
Relative abundance (%) of famililies on animal individual level and at varying time points.
	ID	001m42P	039m42P	248m42P	306m42P	329m42P	333m42P	245m42P	304m42P		001m14P	039m14P	245m14P	248m14P	306m14P	333m14P		24512hKP	24812hKP		3924hKP	24524hKP	24824hKP	30424hKP	30624hKP	32924hKP	33324hKP		03972hKP	24572hKP	30472hKP	30672hKP	32972hKP	33372hKP		001p14P	039p14P	245p14P	304p14P	333p14P		001p100P	245p100P	248p100P	306p100P	333p100P		00112hLP	24512hLP
	Animal	001	039	248	306	329	333	245	304		001	039	245	248	306	333		245	248		039	245	248	304	306	329	333		039	245	304	306	329	333		001	039	245	304	333		001	245	248	306	333		001	245
	Time point	-42	-42	-42	-42	-42	-42	-42	-42		-14	-14	-14	-14	-14	-14		12hK	12hK		24hK	24hK	24hK	24hK	24hK	24hK	24hK		72hK	72hK	72hK	72hK	72hK	72hK		+14	+14	+14	+14	+14		+100	+100	+100	+100	+100		12hL	12hL
Phylum	Families
Actinobacteria	Bifidobacteriaceae	7.88462	0.161917	0.0597586	0	0.0789833	0.574621	0	0.0430071		3.17798	0.0897129	0.0247081	0.413467	0.804399	1.40321		0.0640263	5.17954		0	0.147229	0.316804	1.41963	1.19734	1.64757	5.84514		0.28659	39.9799	14.4498	19.6544	15.1522	30.8275		12.4542	2.24418	27.024	2.76342	4.31833		7.58076	3.91674	3.53863	6.4272	0.439239		0.259489	0.166374
	Coriobacteriaceae	1.65012	5.87759	0.573682	1.25989	0.502621	4.24581	0.551951	0.765526		5.64659	1.82416	0.920378	0.915535	0.645337	1.28487		2.60221	1.49587		1.24016	1.06215	0.950413	0.761974	1.18541	1.64757	3.16325		0.879534	4.63693	1.38756	1.038	0.672683	5.92037		5.33203	1.33981	20.2524	5.08433	15.8504		5.0934	9.42256	3.79978	3.49787	4.805		2.96301	0.694015
	Actinomycetaceae	0	0	0	0	0	0	0.0774668	0		0	0	0	0.00984446	0	0		0	0.0135049		0	0	0.0183655	0.136067	0	0	0		0	0	0	0	0	0		0	0	0	0	0		0	0	0	0	0		0	0
	Unclassified Actinomycetales	0	0	0	0	0	0.0798085	0	0		0.0354685	0	0	0	0	0.0507185		0.0548797	0.00714967		0	0	0	0	0	0	0		0	0	0	0	0	0		0	0	0	0	0		0	0	0	0	0		0	0
	Corynebacteriaceae	0	0	0	0	0	0	0	0		0	0	0	0	0	0		0	0.0476644		0	0	0.0229568	0.0498911	0	0	0		0	0	0.0368053	0	0	0		0	0	0	0	0		0	0	0.0304679	0	0		0	0
	Unclassified Coriobacteriales	0	0	0	0	0	0	0	0		0	0	0	0.00984446	0	0		0	0.00397204		0	0	0	0	0	0	0		0	0	0	0	0	0		0	0	0	0	0		0	0	0	0	0		0	0
	Unclassified Actinobacteria	0	0	0	0	0	0	0	0		0	0	0	0	0	0		0	0		0	0	0	0	0	0	0		0	0	0	0	0	0		0	0	0	0	0		0	0	0	0	0		0	0
Bacteroidetes	Prevotellaceae	25.5397	29.6308	27.967	31.4262	33.69	27.6616	20.6255	18.5876		26.5943	18.9892	29.5509	24.0549	31.3079	24.1251		20.214	23.7123		12.5957	9.19129	25.4545	24.5283	27.5588	22.9003	17.0953		5.8405	5.75214	27.6776	34.2913	37.9113	11.5287		57.7359	11.9243	0.162419	46.3036	13.3852		59.2063	23.9705	55.5734	50.7587	35.778		50.1297	26.0588
	Unclassified Bacteroidales	11.8486	4.77655	9.64503	10.8372	10.5766	12.5938	11.4845	8.80784		10.1014	9.55443	21.3972	14.1366	14.711	12.612		10.3723	10.591		11.3555	8.27637	7.38751	12.5091	10.9233	8.76432	10.8101		7.34262	7.13567	8.0346	4.93305	6.73244	7.69574		0.890802	11.2376	0.312344	4.10955	2.92852		3.57622	10.6535	2.92057	4.61237	7.29402		5.75705	7.79103
	Unclassified Bacteroidetes	16.6998	14.5887	23.013	25.6995	10.196	14.988	19.8702	20.652		12.7119	24.5813	9.93267	15.9037	17.4877	12.7642		22.6608	8.29044		28.4158	25.5653	13.0257	10.6313	9.31222	6.24909	16.4764		14.0725	8.08318	6.71329	3.37774	5.20209	5.01411		4.67565	18.6568	7.15892	4.57063	8.5043		4.31933	7.11728	4.77911	4.49189	6.88141		7.06053	7.88135
	Unclassified Bacteroidia	1.26551	0.825777	0.388431	0.463594	1.10577	0.542698	0.735935	0.920351		1.04987	0.62799	0.772129	1.43729	1.70424	0.43956		3.10985	0.395615		6.2655	2.46083	0.142332	0.816401	0.719997	1.04314	0.550131		3.18213	0.259936	0.776592	0.378685	0.711923	0.155995		0.0170488	3.75147	0	0.0278508	0		0.268346	0	0.0304679	0.602432	0.425928		0	0.437325
	Porphyromonadaceae	0	0	0	0	0	0	0	0		0	0	0	0	0	0		0	0		0	0	0	0	0	0	0		0	0	0	0	0	0		0	0	0	0	0		0.0825679	0	0	0	0		0	0.232923
	Marinilabiliaceae	0	0.0971503	0	0	0	0	0.0290501	0		0	0	0.16678	0	0	0		0.0457331	0.00397204		0	0.0736145	0.00918274	0	0	0	0		0	0	0	0	0	0		0	0	0	0	0		0	0	0	0	0		0	0
	Bacteroidaceae	0	0	0	0	0	0	0	0		0	0	0.0123541	0	0	0		0	0		0	0	0	0	0.0517125	0	0		0	0	0	0.0371923	0	0		0	0	0	0	0		0	0	0	0	0		0	0
Candidatus Saccharibacteria	Saccharibacteria_genera_incertae_sedis	0.924318	2.72021	0.310745	0.332697	0.359015	1.02155	0.251767	0.636504		1.13499	2.24282	0.580641	0.55129	0.936193	1.87658		1.19363	1.05497		2.95482	1.94553	0.730028	0.521589	0.194916	0.672679	3.3833		1.21554	1.81955	0.967979	0.273871	1.03145	0.475412		0.0340977	2.21068	0.112444	0.374439	2.23362		0.851481	2.14861	0.078346	0.410407	1.79689		0.905196	0.874649
	Unclassified Saccharibacteria_genera_incertae_sedis	0.359801	0.242876	0.0597586	0.0381783	0.150786	0.19154	0.435751	0		0.156062	0.822368	0.142072	0.1329	0.122705	0.321217		0.201226	0.346362		0	0.420654	0.114784	0.6123	0.0596682	0.136485	0.907716		0	1.70216	0.371734	0.0304301	0.0672683	0.453127		0	0.368447	0	0.040229	0		0.0567654	0	0.0435256	0.018826	0.279516		0.0543117	0.651234
Chloroflexi	Anaerolineaceae	0	0	0	0	0	0	0	0		0	0.134569	0	0	0	0		0.100613	0.0150937		0	0	0	0.0498911	0	0	0.233806		0	0	0	0	0	0		0	0	0	0	0		0	0	0	0	0		0	0
Elusimicrobia	Unclassified Elusimicrobia	0	0	0	0	0	0	0	0		0	0	0	0.0590667	0	0		0	0.0309819		0	0	0	0	0	0	0		0	0	0	0	0	0		0	0	0	0	0		0.0670864	2.17099	0.0739935	0.135547	0.665513		0.0724157	0.137852
Fibrobacteres	Fibrobacteraceae	0	0	10.4996	0	0	0	7.4465	13.7881		0	0	0	4.8484	0	0		0	0.943756		0	0	1.69421	3.17943	0	0	0		0	0	0.441664	0	0	0		0	0	0	0.148538	0		0	0	0.76605	0	0		0	6.55036
Firmicutes	Acidaminococcaceae	0	0	1.08163	0.0327243	0.107704	0.143655	2.92437	4.73078		0.13478	0	0.210019	1.91967	0.036357	0.152156		0.128053	1.87162		0.16176	0.157745	1.0652	2.28592	0.0954692	0.0389959	0.275065		0.197648	0.0754654	3.33088	0	0	0.0519982		0.136391	0.267962	0	2.36423	1.04236		0.0567654	0.313339	0.853101	0.824579	0.745375		0	1.63046
	Clostridiaceae 1	0.0248139	0	0	0	0	0	0	0		0	0	0.617703	0.698956	0.627159	0		0	0.282015		0	0.11568	0.0734619	0.589623	2.31513	0.151109	0.151286		0	0.285091	0.0515274	11.2118	0.8857	0.148566		0.0298355	0	0	0	0		0.0670864	0	0	0.640084	0.053241		0.102589	0.0665494
	Erysipelotrichaceae	0	0.0971503	0.0119517	0.0490864	0.0215409	0.175579	0.0871502	0.0602099		0	0	0.0185311	0.236267	0.0318124	0.101437		0.146346	6.27582		0.032352	0.43117	0.137741	0.0317489	0	0.194979	0.137533		0.128471	0.209626	0.143541	0.0980525	0.162565	0.259991		0.259995	0.736895	0.287356	8.30883	7.95831		0.722469	0.268577	5.64962	6.15987	0.372687		0.32587	1.06004
	Lachnospiraceae	6.45161	6.80052	2.54572	3.22334	2.85058	7.21468	2.37242	3.46637		8.1223	8.26854	3.42208	3.79504	3.49482	13.9307		8.97741	7.43883		10.1262	14.0604	4.56382	6.97115	3.42894	14.3359	7.92188		36.1992	16.9629	5.74899	4.5307	10.875	14.2847		9.61129	15.3241	13.3808	16.3577	11.3666		4.12323	10.4521	6.67682	5.55744	12.7512		8.58126	4.83909
	Ruminococcaceae	4.92556	7.12435	4.65519	4.95228	4.25074	10.1516	5.11281	3.6728		7.25686	8.91148	3.86682	5.44891	4.36284	10.4649		11.8998	8.48745		12.8869	15.5327	5.61065	7.00744	3.81479	28.6668	12.2954		19.2509	7.94063	9.00626	6.28888	10.7181	8.60942		0.25147	11.5391	0.0249875	1.45134	2.21707		4.54639	3.33483	0.552775	2.96698	4.72514		5.82343	2.94719
	Unclassified Clostridiales	9.72705	11.7228	3.9859	5.18135	7.04387	7.18276	6.41038	9.90022		12.9744	10.8254	4.2498	3.53416	6.11707	10.6002		10.4089	5.99301		9.03699	11.3577	3.9899	5.66038	4.55865	7.40921	12.0204		6.41368	2.93476	4.78101	3.07006	5.43752	8.36428		1.68357	14.7714	19.5527	2.26211	5.44341		5.7075	15.2193	1.65397	5.20351	16.2918		12.0753	3.73152
	Unclassified Firmicutes	0.986352	0.485751	0.687224	0.507227	0.516981	1.02155	0.416384	1.50525		0.76612	0.373804	0.438569	1.28962	1.14979	0.997464		0.996982	1.93756		0.59312	1.23041	0.312213	1.44684	0.477346	2.29588	0.261312		0.53365	0.360557	2.39971	0.324588	1.32294	0.200565		4.60745	0.552671	6.93403	2.89958	20.0695		1.02178	5.55058	1.7889	2.4775	1.0382		0.784503	0.793839
	Veillonellaceae	0.583127	0.178109	0.788813	0.676302	0.208229	0.383081	0.706885	0.756924		0.375967	0	0.197665	0.467612	0.340847	0		0.0548797	1.13044		0.032352	0	0.307622	0.0317489	0.222761	0.131611	0.0825196		0	0.142546	0.191388	0.371923	0.246651	0.103996		0.362288	0.452186	2.07396	0.625097	0.545996		0.335432	0.470009	4.82263	0.195791	0.598962		0.850884	1.31673
	Unclassified Clostridia	0.595533	0.145725	0.113541	0.114535	1.00524	0.319234	0.513218	0.163427		0.546216	0.747608	0.0741244	0.172278	0.0636248	0.743872		0.910089	0.343978		0.517632	3.03923	0.151515	1.25635	0.194916	2.37875	0.440105		1.18589	0.821734	0.114096	0.290776	0.431639	0.111425		0.136391	0.435438	1.33683	0.00928361	1.02581		0.190938	0.895255	0.156692	0.109191	0.625582		0.446563	0
	Unclassified Selenomonadales	0	0	0	0	0	0	0	0		0	0	0	0	0	0		0	0.0667302		0	0	0	0	0	0	0		0	0	0	0	0	0		0	0	0	0	0		0	0	0.22198	0.0489476	0		0	0.171127
	Streptococcaceae	0	0	0	0	0.0143606	0.159617	0	0		0	0	0	0	0.0181785	0		0.0365865	0.0365427		0	0.0736145	0.0137741	0.0181422	0.0636461	0.0146234	0.151286		0.0889416	0.335402	0	0.716797	0.0224228	3.23875		0.161964	0	0	0	0		0.0361234	0	0	0.018826	0		0.0301732	0
	Clostridiales_Incertae Sedis XIII	0	0	0.0358551	0.103627	0	0	0	0		0.0709371	0.0897129	0	0.108289	0.0636248	0.202874		0.192079	0.227995		0.172544	0.157745	0.0964187	0.0997823	0	0.224226	0.233806		0.197648	0	0.0515274	0.0405734	0.0952968	0.252563		0.0468843	0.485681	0	0.040229	0		0	0	0.0826986	0.0225912	0.0931718		0.0784503	0.123592
	Unclassified Erysipelotrichales	0.0310174	0	0	0.0218162	0	0	0	0		0	0	0	0	0	0		0	0.0309819		0	0	0	0	0	0	0		0	0	0	0	0	0		0	0	0	0.0928361	0		0	0	0.0739935	0.105426	0		0	0
	Lactobacillaceae	0	0	0	0	0	0	0	0		0	0	0.0370622	0	0	0		0	0.0262154		0	0	0.0459137	0	0.0596682	0	0		0	0	0.0220832	0.27049	0	0		0	0	0	0	0		0	0	0	0	0		0	0
	Eubacteriaceae	0	0	0	0	0	0	0	0		0	0	0	0	0	0		0	0		0	0	0	0	0	0	0		0	0	0	0	0	0		0	0	0	0.00618908	0		0	0	0.174102	0	0		0	0.0332747
	Leuconostocaceae	0	0	0	0	0	0	0	0		0	0	0	0	0	0		0	0.0103273		0	0	0	0	0	0	0		0	0	0	0	0	0		0	0	0	0	0		0	0	0.0130577	0	0		0	0
	Enterococcaceae	0	0	0	0	0	0	0	0		0	0	0.0247081	0	0	0		0	0		0	0	0	0	0	0	0		0	0	0.0699301	0.0371923	0	0		0	0	0	0	0		0	0	0	0.0075304	0		0	0
	Peptostreptococcaceae	0	0	0	0	0	0	0	0		0	0	0	0.0541445	0	0		0	0		0	0	0	0	0	0	0		0	0	0	0	0	0		0	0	0	0	0		0	0	0	0	0		0	0
	Clostridiales_Incertae Sedis XI	0	0	0	0	0	0	0	0		0	0	0	0	0	0		0	0		0	0	0	0	0	0	0		0	0	0	0	0	0		0	0	0	0	0		0	0	0	0	0		0	0
Fusobacteria	Fusobacteriaceae	0	0	0	0	0	0	0	0		0	0	0	0	0	0		0	0		0	0	0	0	0	0	0		0	0	0	0	0	0		0	0	0	0	0		0	0	0	0	0		0	0
Lentisphaerae	Unclassified Lentisphaerae	0	0	0	0.0218162	0	0	0	0		0	0	0	0	0	0		0	0		0	0	0	0	0	0	0		0	0	0	0	0	0		0	0	0	0	0		0	0	0	0	0		0	0
Proteobacteria	Succinivibrionaceae	3.0273	0.728627	3.72296	4.5814	10.1458	2.63368	2.71134	1.74609		2.05008	0.837321	1.82222	1.88029	3.04036	0.524091		0.114333	0.954878		0	0.0841308	11.7264	2.72587	3.07093	0.0536193	0.385091		0	0	0.669856	0.114958	0.229834	0		0	0	0	0.457992	0		0	0	0.113166	0.256034	0		0	0.903171
	Unclassified Gammaproteobacteria	0.936725	3.86982	0.209155	0.272702	8.34351	2.85714	0.978019	0.404266		1.49677	2.07835	5.35549	3.09116	2.12234	2.29924		0.480198	5.89768		0.194112	0.368072	7.60331	6.97569	16.3372	0.219352	0.907716		0.28659	0.259936	4.88038	1.2713	0.997814	0		0	0.619662	0	0	0		0	0	0.300326	0.46312	0		0	15.4965
	Unclassified Proteobacteria	1.17246	4.2908	1.21907	1.06354	4.12149	1.69194	2.61451	1.35042		0.38306	1.24103	3.10087	2.67769	1.60425	0		1.11131	0.834128		1.31565	0.788726	4.47199	3.31549	9.1014	0.224226	1.4716		0.138354	0	2.59845	0.622126	0	0.490269		0.11508	0.904371	0	0.0185672	0		0.0670864	0.0447628	0.039173	0.0075304	0.106482		0.265524	1.678
	Unclassified Betaproteobacteria	0.663772	0.534326	0.382455	0.387238	0.24413	0.574621	1.44282	3.69861		0.773214	0.912081	1.39601	0.206734	0.690783	0.456467		0.699716	0.0452812		0.258816	0.683563	0.238751	0.2041	0.803532	0	0.522624		0.138354	0	0.0441664	0.378685	0.112114	0.118853		0	0.251214	0	0	0		0	0	0	0	0		0.0181039	0
	Comamonadaceae	0.0372208	0	0	0	0	0	0	0		0.0638434	1.55502	0	0	0.0954372	0.0507185		0.0457331	0.00873848		0.129408	0	0	0	0	0	0.0550131		0.0592944	0	0	0	0	0		0.0895064	0	0	0	0		0	0	0	0	0		0.0120693	0
	Unclassified Alphaproteobacteria	0	0	0	0	0	0	0	0		0	0	0	0	0	0		0	0.0699078		0	0.0630981	0	0	0.067624	0.00974896	0		0	0.0335402	0	0.0642413	0	0		0	0.0837381	0	0	0		0	0	0	0	0		0.199143	0
	Desulfobulbaceae	0.0558313	0	0	0	0	0	0.0484168	0		0.0993119	0.0897129	0.0494163	0	0	0		0.073173	0		0.086272	0.0630981	0	0	0	0	0		0.0592944	0	0	0	0	0		0	0	0	0	0		0.0670864	0.49239	0	0	0		0.0482771	0.0475353
	Campylobacteraceae	0	0	0	0	0	0	0	0		0	0	0	0.0295334	0	0		0	0.0262154		0	0	0.105601	0.04082	0	0	0		0	0	0	0	0	0		0	0	0	0	0		0	0	0	0	0		0	0
	Unclassified Burkholderiales	0.0434243	0	0	0	0	0	0	0.0946155		0.106406	0	0	0	0	0		0.073173	0		0	0	0	0	0	0	0		0	0	0	0	0	0		0	0	0	0	0		0.0412839	0	0	0	0		0	0
	Unclassified Deltaproteobacteria	0	0	0	0	0	0	0.125884	0.12042		0	0	0	0	0	0		0	0		0	0	0	0	0	0	0		0	0	0	0	0	0		0	0	0	0	0		0	0	0	0	0		0	0
	Neisseriaceae	0	0	0	0	0	0	0	0		0	0	0	0	0	0		0	0		0.064704	0	0	0	0	0	0.0550131		0	0	0	0	0	0		0	0	0	0	0		0	0	0	0	0		0	0
	Acetobacteraceae	0	0	0	0	0	0	0	0		0	0	0	0	0	0		0	0		0	0	0	0	0	0	0		0	0	0	0	0	0		0	0	0	0	0		0	0	0	0	0		0	0
	Enterobacteriaceae	0	0	0	0	0	0	0	0		0	0	0	0	0	0		0	0		0	0	0	0	0	0	0		0	0	0	0	0	0		0	0	0	0	0		0	0	0	0	0		0	0
	Pseudomonadaceae	0	0	0	0	0	0	0	0		0	0	0	0	0	0		0	0		0	0	0	0	0	0	0		0	0	0	0	0	0		0	0	0	0	0		0	0	0	0	0		0	0
Spirochaetes	Spirochaetaceae	0	0	0.400382	0.747205	0.323113	0	0.677835	0		0	0	0.994502	2.26423	0.708962	0		0	0.940578		0	0	2.26354	1.71898	0.60066	0.0731172	0		0	0	0.916452	0.649175	0.667078	0		0	0	0	0	0		0	0	0.0130577	0.523363	0		0	2.06303
	Unclassified Spirochaetales	0	0	0.256962	0.190892	0.215409	0	0.290501	0		0	0	0.382976	0.379012	0.499909	0		0	0.157293		0	0	0.459137	0.145138	0.18696	0.0633683	0		0	0	0.117777	0	0	0		0	0	0	0	0		0	0	0	0.0338868	0		0	0.366022
	Unclassified Spirochaetia	0	0	0	0	0	0	0	0		0	0	0	0.0836779	0	0		0	0		0	0	0	0	0	0	0		0	0	0	0	0	0		0	0	0	0	0		0	0	0	0	0		0	0.147359
SR1	SR1_genera_incertae_sedis	1.37717	1.73251	1.26688	1.29261	0.919078	1.78771	1.1039	0.91175		0.943463	1.64474	1.21688	1.00906	0.513543	1.43702		0.814049	0.500477		0.345088	1.95604	0.886134	0.65312	0.234695	0	1.40283		0.0889416	0.243166	0.283401	0.0439546	0	0.698262		0.00852442	0	0	0.256847	0.148908		0.0928888	3.02149	0.326442	0.240973	1.19792		0.500875	2.02976
	Unclassified SR1_genera_incertae_sedis	0	0	0	0	0	0	0	0		0	0	0.0803014	0	0.0681694	0.371936		0.278972	0.025421		0	0	0	0.140602	0.0437567	0	0.302572		0	0	0	0	0	0		0	0	0	0	0		0	0	0	0	0		0	0
Synergistetes	Synergistaceae	0	0	0	0	0	0	0	0.0344056		0.13478	0	0.117364	0	0	0		0	0		0	0	0	0	0	0	0		0	0	0	0	0	0		0	0	0	0	0		0	0	0	0	0		0	0
Tenericutes	Anaeroplasmataceae	0.744417	1.14961	0.699175	0.6054	0.0861636	0.175579	1.44282	0.249441		1.36909	1.27093	1.99518	1.62926	0.936193	0.473373		0.562517	1.01922		0.560768	0	1.32691	0.562409	0.887068	0.0633683	0.357585		1.2353	0	0.934855	2.53584	0.100903	0.557124		0	0.117233	0	0.547733	0.529451		0.0670864	0.134288	0.661589	1.32159	0.425928		0.0724157	1.82536
	Unclassified Anaeroplasmatales	0.0620347	0.145725	0	0	0	0	0.280817	0		0.0993119	0.657895	0.172957	0	0.0409017	0.202874		0.0914662	0.00635526		0	0	0.0275482	0.0907112	0.103425	0	0.0550131		0.0889416	0	0.0478469	0.0912902	0	0.0817115		0	0.150729	0	0	0		0	0	0	0	0		0	0
	Unclassified Mollicutes	0	0	0	0	0	0	0	0		0	0	0	0	0	0		0	0.0111217		0	0	0	0.12246	0	0	0		0	0	0.128819	0	0	0		0	0	0	0	0		0	0	0	0.0451824	0		0	0.218662
Unclassified Bacteria	Unclassified Bacteria	2.33871	2.07254	5.4201	5.86856	2.92238	1.62809	8.23085	2.93308		1.62446	1.62978	6.65884	6.55149	5.65352	2.11327		1.2851	3.20305		0.657824	0.694079	4.65565	2.64423	2.10828	0.389959	2.04924		0.889416	0.0251551	2.6095	2.96186	0.190594	0.356559		1.35965	1.57428	1.38681	0.878849	2.43216		1.75457	0.402865	4.19151	1.81483	2.60881		2.58283	6.98769
Verrucomicrobia	Subdivision5_genera_incertae_sedis	0.0434243	0	0	0.0490864	0	0	0	0		0	0	0	0	0	0		0	0.00794407		0	0	0	0.0453556	0.0198894	0	0		0	0	0	0	0.0224228	0		0	0	0	0	0		0	0	0	0	0		0	0.0475353
[truncated: 34 more columns]

## Sheet: Families_Duodenum
Supplementary Data 2
Families Duodennum
Relative abundance (%) of famililies on animal individual level and at varying time points.
	ID	001m42D	333m42D	039m42D	245m42D	248m42D	304m42D	306m42D	329m42D		001m14D	039m14D	245m14D	248m14D	304m14D	306m14D	333m14D		03912hKD	24512hKD	30412hKD	32912hKD	33312hKD		00124hKD	03924hKD	24524hKD	30424hKD	30624hKD	32924hKD	33324hKD		03972hKD	24572hKD	30472hKD	30672hKD	33372hKD		001p14D	039p14D	245p14D	304p14D	333p14D		001p100D	245p100D	248p100D	304p100D	306p100D
	Animal	001	333	039	245	248	304	306	329		001	039	245	248	304	306	333		039	245	304	329	333		001	039	245	304	306	329	333		039	245	304	306	333		001	039	245	304	333		001	245	248	304	306
	Time point	-42	-42	-42	-42	-42	-42	-42	-42		-14	-14	-14	-14	-14	-14	-14		12hC	12hC	12hC	12hC	12hC		24hC	24hC	24hC	24hC	24hC	24hC	24hC		72hC	72hC	72hC	72hC	72hC		+14	+14	+14	+14	+14		+100	+100	+100	+100	+100
Phylum	Families
Actinobacteria	Bifidobacteriaceae	5.30033	0.118343	0.0273224	0.282924	3.51592	0	0	0.243653		1.65111	0.522234	0.123001	1.34553	0.63342	4.4176	2.10275		0.0659051	0.45899	6.84495	5.84875	8.69565		2.2419	0.185771	0.339794	5.90972	17.4237	1.61686	6.42273		0.139199	24.8831	12.9375	33.1089	18.134		2.21661	5.2127	4.83987	11.5975	1.17315		3.12049	1.10066	7.5371	0.262346	2.1311
	Coriobacteriaceae	1.93835	1.01775	0.95082	0.355937	6.39258	1.15299	1.23889	0.385129		1.02438	1.37022	1.56827	1.6577	1.24673	0.573142	0.787629		0.70848	1.15745	1.16468	0.680832	1.19255		0.317125	0.878646	0.377548	1.19939	0.461894	0.858958	0.918645		0.56046	3.29023	0.805003	0.950495	0.851011		0.943442	1.17013	3.03038	35.538	4.82297		2.80225	4.60144	8.07089	24.0278	1.69618
	Unclassified Actinobacteria	0	0	0	0.74838	0.0814741	0	0	0		0.0734786	0.263702	0.512505	0.279871	0	0	0		0	0.209539	0	0	0		0	0.06025	0.201359	0	0	0	0.0467108		0.172167	0	0	0	0		0	0	0.0282733	0	0		0.0147332	0.0678821	0.224191	0	0.0120811
	Corynebacteriaceae	0	0	0	0	0.0846077	0	0	0		0	0.0103413	0	0	2.36276	0	0		0	0	0.0520528	0.0319854	0		0	0	0	0.0218071	0	0	0		0.0109894	0.0424938	0	0.0528053	0		0	0	0.0231327	0.123377	0		0	0	0	0	0
	Unclassified Actinomycetales	0	0.236686	0	0.0365063	0	0	0	0		0.138313	0.041365	0	0.0753498	0.160869	0	0		0.164763	0	0	0	0.15735		0.0308316	0.0853542	0	0	0	0	0		0	0	0	0	0.0375446		0	0.225567	0.0719683	0	0		0	0	0	0	0
	Unclassified Coriobacteriales	0	0	0	0	0.0125345	0.029067	0.0437254	0		0.00864454	0	0	0	0	0.0440878	0		0	0	0.0260264	0	0		0	0	0	0	0	0	0		0	0	0	0	0		0	0	0.0051406	0.0482781	0		0	0	0	0	0.00724865
	Actinomycetaceae	0	0	0	0	0	0	0	0.0628783		0	0	0	0	0	0	0		0	0	0	0	0		0	0	0	0	0	0	0		0	0	0	0	0		0	0	0	0	0		0	0	0	0	0
Bacteroidetes	Prevotellaceae	24.6071	14.8166	21.4426	11.9284	11.093	8.53599	18.5541	14.7685		19.2254	16.1634	11.9311	11.2594	9.03881	8.6853	19.987		19.6617	13.6899	9.01815	20.4706	18.1532		8.23203	15.1981	14.9887	7.36352	12.8047	21.5967	21.9541		17.7442	13.6284	9.93316	20.3564	20.6746		40.4308	22.4544	39.1559	0.230662	47.6132		31.3463	42.2517	19.9317	25	29.7533
	Unclassified Bacteroidales	9.62602	18.3432	7.97814	6.75367	8.27588	14.456	9.32809	13.4245		10.2611	12.5336	9.7786	9.94618	10.1951	10.7927	14.1484		11.4785	7.90261	9.38903	9.0016	12.7619		2.6339	10.8149	7.1105	11.1434	6.18424	8.27198	11.2106		10.8392	6.82936	9.23597	3.47195	12.5774		0.998797	13.2133	4.35665	0.407682	4.19588		5.38645	7.24399	2.76503	0.339506	5.34951
	Unclassified Bacteroidetes	10.4364	12.7101	12.6831	19.9872	11.8482	11.6849	14.7063	14.8235		9.55654	10.6618	12.3206	13.0678	11.6127	16.8945	15.7309		14.252	16.6833	12.1804	7.95979	11.7019		1.53277	14.9822	17.5308	12.5754	12.0092	7.644	9.39665		12.0151	5.15996	6.72752	4.43564	7.50892		2.08664	10.3338	7.46157	1.38397	6.48582		3.76875	6.34213	4.68667	3.22531	3.91669
	Unclassified Bacteroidia	0.481849	0.0710059	1.53005	2.06261	0.799072	0.726674	0.393529	0.558044		1.43067	1.68563	1.50677	0.947255	0.191032	0.476148	0.917696		2.27373	1.56655	0	1.38908	0.960663		0.0880902	3.08279	1.8374	0.0654212	0.513215	1.60243	0.5761		2.61548	0.588842	0.0934378	0.382838	0.800951		0.0361011	2.98523	0.244178	0	0.0317069		0.347703	0.0969744	0.0533789	0	0.459081
	Porphyromonadaceae	0.498275	0	0	0	0	0	0	0.0314391		0.0129668	0.0258532	0	0	0	0	0		0.060413	0	0	0	0		7.41279	0.125521	0.113265	0	0	0	0.0311405		0.0183157	0	0	0	0		0	0	0	0	0		0.0147332	0	0	0	0
	Bacteroidaceae	0.208071	0	0	0	0	0	0	0.0785978		0.0216113	0	0	0	0	0	0		0	0	0	0.00913868	0		5.69503	0	0	0	0	0	0		0.00732628	0	0	0	0		0.0433213	0	0	0	0		0.0383063	0	0	0	0
	Marinilabiliaceae	0	0	0.114754	0.100392	0	0	0	0		0	0	0.440754	0	0	0	0		0.0219684	0.169627	0	0	0		0	0.030125	0.176189	0	0	0	0		0.0293051	0	0	0	0		0	0	0	0	0		0	0	0	0	0
Candidatus Saccharibacteria	Saccharibacteria_genera_incertae_sedis	0.125938	0.213018	0.153005	0.164279	0.235021	0.232536	0	0.133616		0.0994122	0.589452	0.215252	0.322928	0.784235	0.132263	0.325168		0.324033	0.0898024	0.559568	0	1.39959		0	0.466938	0.151019	1.2212	0	0.187671	0.194628		0.131873	0.661689	1.07094	0	0		0	0.408839	0.100242	0	0.373437		0.235731	0.475175	0.40568	0	0.277865
	Unclassified Saccharibacteria_genera_incertae_sedis	0.0547555	0	0	0.0638861	0.11281	0	0	0		0	0.0775595	0	0.204521	0.21114	0	0.0867115		0.0219684	0.0798244	0.0585594	0.0502627	0.15735		0	0	0	0.203533	0.513215	0.101054	0		0	0.412797	0	0	0.0938615		0	0.0563916	0.0308436	0	0		0	0	0	0	0.0918163
Chloroflexi	Anaerolineaceae	0.235449	0.189349	0.163934	0.127772	0.0689396	0	0	0.0471587		0	0.0775595	0	0.247578	0	0	0.0505817		0	0.0598683	0	0	0		0	0	0	0	0	0	0.28805		0.0476208	0	0	0	0.150178		0	0.0105734	0.120804	0	0		0	0	0	0	0
Elusimicrobia	Unclassified Elusimicrobia	0	0	0	0	0.0501379	0	0	0		0	0	0	0	0	0	0		0	0	0	0	0		0	0	0	0	0	0	0		0	0	0	0	0		0	0	0	0	0		0.0176798	0.552754	0.149461	0	0.118395
Fibrobacteres	Fibrobacteraceae	3.9643	0	8.48634	14.4474	0.0313362	0	0	7.52181		9.22372	8.71251	8.34358	0	0	0	0		7.84271	5.48793	0	2.26182	0		0.0396406	6.71286	3.42311	0	0	0	0		3.13565	2.5557	0	0	0		0.690734	6.25242	1.62443	0	0		1.04606	0.0678821	0.384328	0	0.978568
Firmicutes	Acidaminococcaceae	3.19225	5.04142	3.11475	3.03003	3.38117	8.2647	3.35228	0		2.36428	2.92658	4.26404	4.49946	5.92198	10.0256	0.180649		2.86138	5.44801	5.41349	0	0.190476		0.383192	2.54054	1.24591	5.94606	8.49371	0	0.062281		1.89751	3.0899	4.5497	5.66337	0		0.835138	4.55715	1.61158	3.1488	0.584816		1.13151	2.17708	3.7899	4.01235	1.97888
	Clostridiaceae 1	0	0	0	0	1.1375	0.029067	0.0874508	0		0.0518672	0	1.24026	2.48654	0.130706	0	0.0361298		0	0.0798244	0.878392	0.607722	0.190476		40.6272	0	0.780267	1.3375	0	0.512487	0.755158		0.0146526	0.139622	0.733127	0	0.225268		0	0	0.00771089	0	0		0.182691	0	0.106758	0.0462963	0.280281
	Erysipelotrichaceae	0.186169	0.118343	0.0874317	0.164279	1.73602	0.029067	0	0		0.531639	0.0258532	0.184502	0.139935	0.0301629	0.158716	0.0433557		0.0549209	0.0598683	0.38389	0.109664	0.149068		0.369979	0.06025	3.75031	0.254416	0.0769823	0.11549	0.108992		0.0842522	0.261033	0.373751	0.184818	0.131406		10.3947	0.119832	3.45962	1.36788	4.09371		2.47223	1.11521	2.26326	0.277778	5.69744
	Lachnospiraceae	8.92515	12.3077	4.65574	11.4721	17.2568	18.7385	24.9235	6.50004		7.44727	9.29679	10.3629	19.7847	12.6584	17.6792	10.9907		8.34249	8.2718	17.7891	12.7759	5.83851		0.422833	8.90194	6.50642	18.7177	19.9384	12.242	5.75321		15.3192	14.8182	19.7729	16.7261	14.3295		12.9603	9.37159	14.7175	27.4702	11.9993		11.0499	17.4505	27.0844	27.4846	10.513
	Ruminococcaceae	6.11072	12.426	9.63934	6.06005	9.79255	11.5493	7.57907	4.74731		7.30031	12.2854	13.7249	13.38	15.8556	6.71898	11.3953		13.1261	10.467	15.0498	15.1885	13.8965		0.977801	17.8842	9.52681	14.2473	6.87708	13.866	10.3231		18.7663	4.91714	18.2204	2.9967	10.4562		0.113117	6.33349	3.48532	1.98477	0.796195		3.62731	3.54441	2.41273	0.138889	2.72549
	Unclassified Clostridiales	6.69112	10.8402	5.66667	8.7889	11.4408	13.5258	14.1525	5.65118		6.23271	7.29576	9.8401	10.1292	13.3119	17.7674	6.41665		5.80514	6.92477	10.827	4.16724	6.64182		0.999824	5.78902	5.6003	9.20986	9.98204	5.096	4.29739		3.93055	6.62296	6.93596	8.44884	4.93711		1.17208	6.74937	6.819	10.0365	3.00511		4.76471	6.44395	7.06736	0.910494	4.35161
	Unclassified Firmicutes	0.64064	0.591716	0.699454	1.06781	1.98358	0.639473	0.991109	0.37727		1.23617	1.20993	1.03526	1.19483	1.69918	1.20801	0.657562		1.05448	1.30712	0.949964	2.49943	0.728778		0.0616631	1.50123	2.76869	0.886821	0.744162	2.46138	0.443752		1.28942	0.7831	1.25063	0.514851	0.275327		0.832732	0.528672	0.881612	3.27218	4.12894		0.966497	1.71645	3.99274	8.75	1.70585
	Veillonellaceae	1.69195	0.236686	0	0.310304	0.278892	0.261603	0	0.0392989		0.263658	0.0879007	0	0	0.191032	0.158716	0		0.0219684	0	0.065066	0.013708	0		0.140944	0.0200833	0	0.138112	0.230947	0	0		0.0732628	0.194257	0.488752	0.105611	0.0250297		0.799037	0.334825	0.264741	0.144834	0.0986436		0.68362	0.242436	0.20284	0.617284	2.235
	Unclassified Clostridia	0.0766577	0	0.20765	0.593228	0.394836	0.319736	0.393529	0.510886		0.207469	0.589452	0.348503	0.322928	0.462497	0.299797	0.419105		0.335018	0.429056	2.12766	0.379255	0.057971		0	0.532209	1.66121	1.99171	0.384911	1.14768	0.0311405		0.410271	0.370303	0	0.39604	0.0312872		0	0.23614	0.254459	0	0.260701		0.159118	0.552754	1.31312	0	0.0652379
	Lactobacillaceae	0.131413	0	0	0	0.495112	0.019378	0	0.0235793		0.047545	0	0	0.0753498	3.90107	0	0.0361298		0.181239	0	0.396903	0.0456934	0		0.27308	0	0	0	1.15473	0.454742	0.0155703		0	1.09877	0.510314	0.0528053	0		0.0770156	0.281958	0.0128515	0.166291	0		0.232784	0	0.096082	2.0216	0
	Clostridiales_Incertae Sedis XIII	0.19712	0.426036	0.0382514	0.264671	0.573452	0.959209	1.02026	0.0864576		0.129668	0.33092	0.584256	0.441335	0.522823	0.925844	0.195101		0.417399	0.229495	0.787299	0.0502627	0.215321		0	0.376563	0	0.59606	0.538876	0.173235	0.0856364		0.190483	0.103199	0.251563	0.435644	0.0375446		0.0312876	0.475804	0.326428	1.6951	0.00704597		0.111972	0.0387898	0.0533789	0	0.0869838
	Unclassified Selenomonadales	0.279253	0	0	0	0.109677	0	0	0		0	0	0	0	0	0	0		0	0	0	0	0		0	0	0	0	0	0	0		0	0	0	0	0		0.055355	0	0.0205624	0	0		0.206265	0.475175	1.24907	2.4537	0.355184
	Peptostreptococcaceae	0.0383289	0	0	0	0	0	0	0		0	0.0103413	0	0	0	0	0		0.0164763	0	0	0	0		9.87051	0	0	0	0	0	0		0	0	0	0	0		0	0	0	0	0		0	0	0	0	0
	Eubacteriaceae	0	0	0.0382514	0	0.0376034	0	0	0.0392989		0.0172891	0.0465357	0	0	0	0	0.0289038		0	0	0	0.013708	0		0	0	0	0	0	0.0216544	0		0	0	0	0	0		0.23586	0	0	0.193112	0		0.229838	0.145462	0.106758	0.0617284	0.244038
	Streptococcaceae	0	0.118343	0	0.0365063	0.0626723	0.0387559	0.0874508	0		0	0.0103413	0	0	0	0	0		0.0219684	0	0.130132	0.0228467	0.149068		0.145349	0	0	0.0218071	0	0.0433088	0.0544959		0	0.242822	0	0.422442	0.87604		0.0120337	0	0	0	0.0176149		0	0	0.0213516	0	0.00966487
	Unclassified Erysipelotrichales	0.0383289	0	0	0	0.0156681	0	0	0		0.0129668	0	0	0	0	0	0		0	0	0	0	0		0	0	0	0	0	0	0		0	0	0	0	0		0.163658	0	0	0	0		0.0707193	0.00969744	0	0	0.0434919
	Clostridiales_Incertae Sedis XI	0.0109511	0	0	0	0	0	0	0		0	0	0	0	0	0.0176351	0		0	0	0	0	0		2.55902	0.0251042	0	0	0	0	0.0389257		0	0	0	0	0		0	0	0	0	0		0	0	0	0	0
	Enterococcaceae	0	0	0	0	0.0188017	0	0	0		0	0	0	0	0.0402172	0	0		0	0	0.0390396	0	0		0.480092	0	0	0.0363451	0	0	0		0	0	0.222813	0.145215	0		0	0	0	0	0		0	0	0	0	0
	Leuconostocaceae	0	0	0	0	0	0	0	0		0	0	0	0	0	0	0		0	0	0	0	0		0	0	0	0	0	0	0		0	0	0	0	0		0	0	0	0	0		0	0	0	0	0
Fusobacteria	Fusobacteriaceae	0.383289	0	0	0	0	0	0	0.180775		0.064834	0.103413	0	0	0.0502715	0	0.0794855		0.170255	0	0.0130132	0.0182774	0.165631		8.5932	0	0.0880946	0	0	0.0216544	1.44025		0	0	0	0	0		0	0	0	0	0		0	0	0	0	0
Lentisphaerae	Unclassified Lentisphaerae	0.0109511	0	0	0	0.0376034	0	0	0		0.0172891	0	0	0.118407	0	0	0.0361298		0	0	0	0	0		0	0	0	0	0	0	0		0	0	0	0	0		0	0	0.0205624	0	0		0.0206265	0	0	0	0
Proteobacteria	Succinivibrionaceae	3.58101	2.24852	2.25137	2.54632	1.0623	2.01531	0.408104	9.4789		5.05273	2.36815	3.28003	0.215285	1.34728	0	1.35125		1.08743	1.53662	0.696207	5.07197	1.3913		0.220226	1.69704	2.63025	0.755979	0	5.52909	1.16777		2.69607	2.64068	0.999066	0	2.59058		0.0818291	1.1525	0.0925307	0	0.0176149		0.103132	0	0	0	0.531568
	Unclassified Gammaproteobacteria	1.67004	2.50888	9.71038	0.620608	2.03685	0.852631	0	6.70439		5.1046	1.62875	1.39401	1.14101	1.97064	0	3.07826		1.49934	2.03552	0.891405	3.92963	2.99793		0.396406	0.557313	4.45507	3.03845	0	6.72008	2.37446		3.24188	1.92436	2.7672	0	0		18.6643	2.1605	0.223616	0	0.440373		20.1845	0.174554	0.224191	0.123457	16.481
	Unclassified Proteobacteria	1.74123	0.686391	4	1.15908	1.1469	1.00765	0	2.7352		1.50847	1.43226	1.18901	0.430571	0.552986	0	1.43797		1.14236	1.61644	0.286291	2.06077	2.00414		0.286293	0.487021	1.53536	0.188995	0	3.68125	1.30012		0.179494	0.0424938	0.150938	0	0.250297		0.0842359	0.398266	0.665707	0	0.0176149		0.0471462	0.353957	0.395004	0.0771605	0.0604054
	Unclassified Betaproteobacteria	0.405191	0.426036	0.502732	0.702747	0.429306	0.833253	0	0.825277		0.661307	0.434333	0.574006	0.247578	0.683692	0	0.664788		0.884227	1.27719	1.15818	1.18346	1.30849		0.246653	1.12969	1.08231	0.312568	0	1.35701	1.17555		0.586102	0.522066	0.14375	0	0.525624		0	0.602686	0.42924	0	0.0951207		0.0913457	0.0775795	0.0320273	0	0.0362433
	Neisseriaceae	0	0.757396	0.202186	0.273798	0.222487	0.310047	0	0.70738		0.13399	0.103413	0	0	0.402172	0	0.202327		0.395431	0.399122	0.546555	0.319854	0.372671		0.0836857	0.306271	0.566323	0	0	0.563014	0.326975		0.194146	0.163905	0	0	0		0.0385078	0.218518	0.192772	0	0		0	0	0	0	0
	Unclassified Deltaproteobacteria	0.410666	1.15976	0.322404	0.209911	0.272625	0.794497	0	0.251513		0.151279	0.263702	0.338253	0.365985	0.301629	0	0		0.324033	0.149671	0.38389	0.178204	0		0	0.306271	0	0.261685	0	0	0		0.12821	0.0607054	0.165313	0	0		0	0.222042	0.105382	0.166291	0		0	0	0	0	0
	Acetobacteraceae	0.0930844	0	0	0.40157	0.322763	0.106579	0	0.070738		0.0778008	0.0879007	0.143501	0.172228	0.191032	0	0.0505817		0.0384446	0.0898024	0.175678	0	0.0993789		0.0704722	0	0.276869	0.159919	0	0	1.73608		0.0439577	0	0.0790627	0	0		0.0264741	0	0.0334139	0	0		0.032413	0.0484872	0.128109	0	0.0169135
	Desulfobulbaceae	0	0.331361	0	0.0547595	0.0846077	0	0	0.0864576		0.0432227	0.0465357	0	0.0322928	0.0703801	0	0		0.0384446	0.0399122	0.110612	0.0411241	0.149068		0	0	0.0377548	0.0872283	0	0	0.062281		0.0146526	0	0.0790627	0	0		0.0288809	0.0458182	0.0231327	0.0911919	0.0211379		0.0441995	0.0581846	0.149461	0	0.021746
	Unclassified Alphaproteobacteria	0	0	0.147541	0	0	0	0	0		0	0	0	0	0	0	0		0	0	0	0.0685401	0		0	0	0	0	0	0.101054	0		0.0439577	0	0	0	0		0	0	0.0591168	0	0		0	0	0	0	0
	Unclassified Burkholderiales	0.0383289	0	0.136612	0.136899	0	0	0	0.149336		0.0605118	0.0517063	0.123001	0	0	0	0.0794855		0.142794	0	0	0.0685401	0.248447		0	0.0953959	0	0	0	0.0721813	0.186843		0.0402945	0.0364232	0	0	0		0.0288809	0.116308	0.131085	0	0.0211379		0.0589327	0.0533359	0	0	0.0265784
	Enterobacteriaceae	0	0	0	0	0	0	0	0		0	0	0	0	0	0	0		0.0274605	0	0	0	0		2.19345	0	0	0	0	0	0		0	0	0	0	0		0	0	0	0	0		0	0	0	0	0
	Pseudomonadaceae	0	0	0	0	0	0	0	0		0	0	0	0	0	0	0		0	0	0	0	0		0.233439	0	1.6738	0	0	0	0		0	0	0	0	0		0	0	0	0	0		0	0	0	0	0
	Campylobacteraceae	0.0657066	0	0	0	0	0	0	0.070738		0.0345781	0	0	0	0	0	0		0	0	0	0.0594014	0		0	0	0	0	0	0	0		0	0	0	0	0		0	0	0	0	0		0	0	0	0	0.0144973
	Comamonadaceae	0	0	0	0	0	0	0	0		0	0	0	0	0	0	0		0	0	0	0	0		0	0	0	0	0	0	0		0	0	0	0	0		0	0	0	0	0		0	0	0	0	0
Spirochaetes	Spirochaetaceae	0.969173	0	0.295082	0	0	0	0	0.864576		1.19727	0.486039	0	0	0	0	1.78481		0.818322	0	0	0.744802	1.81366		0	0.903751	0	0	0	0.88783	1.1522		0.43225	0	0	0	1.10757		0.0601685	0.327776	0	0	1.33169		0.474408	0	0	0	1.0124
	Unclassified Spirochaetales	0.158791	0	0.628415	0	0	0	0	0.424428		0.376037	2.56463	0	0	0	0	0.556399		0.208699	0	0	0.146219	0.26501		0	0.165688	0	0	0	0	0.194628		0.142862	0	0	0	0.0250297		0.00722022	0.126881	0	0	0		0.0441995	0	0	0	0.212627
	Unclassified Spirochaetia	0	0	0	0	0	0	0	0		0	0	0	0	0	0	0		0	0	0	0	0		0	0	0	0	0	0.0505269	0		0	0	0	0	0		0	0	0	0	0		0	0	0	0	0
SR1	SR1_genera_incertae_sedis	0.476373	0.686391	0.846995	0.921785	0.576586	0	0.757907	1.10823		0.600795	0.604964	0.943009	0.925727	0.874724	0.943479	0.390202		0.36797	1.70625	0.605114	0.196482	0.654244		0.0792812	0.391625	1.13265	0.625136	1.00077	0.101054	0.334761		0.157515	0.248892	0.596564	0.435644	0.513109		0	0.0211469	0.452372	0	0.0669368		0.0677726	0.392746	0.0640547	0	0.389011
	Unclassified SR1_genera_incertae_sedis	0	0	0	0.146025	0	0	0	0		0.0864454	0.0517063	0.215252	0	0	0	0.195101		0.115334	0.379166	0	0	0.0828157		0	0.115479	0.289454	0	0	0	0.101207		0	0	0	0	0		0	0	0.100242	0	0		0	0	0	0	0
Synergistetes	Synergistaceae	0	0	0.26776	0.282924	0	0	0	0.306531		0.194502	0.196484	0	0	0	0	0.224005		0	0.369188	0	0.159927	0.231884		0	0.266104	0.515983	0	0	0.23098	0		0	0.182116	0	0	0.162693		0	0	0.0873901	0	0		0	0	0	0	0
Tenericutes	Anaeroplasmataceae	1.71932	0.52071	0.579235	0.930912	0.711331	0.697607	0	0.856716		1.53441	0.537746	1.07626	1.15178	0.914941	0	1.32235		0.373462	0.309319	0	0.726525	0.546584		0.101304	0.155646	0.327209	0	0	1.47972	0.435967		0.556797	0.880228	0	0	0.475565		4.24067	0.126881	2.29528	0	1.89537		0.441995	0.00969744	0.0747304	0	1.86049
	Unclassified Anaeroplasmatales	0	0	0	0.182532	0.0250689	0.0581339	0	0		0	0.103413	0.123001	0	0	0	0		0.0384446	0.0399122	0	0	0		0	0	0.453058	0	0	0	0		0.0183157	0.0849876	0	0	0.043802		0	0.0493427	0	0	0		0	0	0	0	0
	Unclassified Mollicutes	0	0	0	0	0	0	0	0		0	0	0	0	0	0	0		0	0	0	0	0		0	0	0	0	0	0	0		0	0	0	0	0		0	0	0	0	0		0	0	0	0	0.0265784
Unclassified Bacteria	Unclassified Bacteria	2.58994	0.852071	2.43169	2.58282	1.75483	2.13158	1.98222	5.07742		4.52974	2.04757	2.27552	3.39074	1.47798	2.08095	4.01041		3.21287	9.27958	1.00202	1.39822	4.37267		1.96001	3.16815	6.84621	1.48288	0.66718	1.19099	15.0019		2.08066	2.51927	0.905628	0.712871	2.15256		1.61011	3.11916	2.13335	0.933376	6.40479		4.3404	2.11889	4.96424	0.169753	4.20422
Verrucomicrobia	Subdivision5_genera_incertae_sedis	0	0	0	0	0	0	0	0.0471587		0	0.0361944	0	0	0	0	0		0	0	0	0.0502627	0.057971		0	0	0	0	0	0	0		0	0	0	0	0		0	0	0	0	0		0.0206265	0	0	0	0.021746
[truncated: 40 more columns]

## Sheet: Genera_Rumen
Supplementary Data 2
Genera rumen
Relative abundance (%) of genera on animal individual level and at varying time points.
		ID	001m42P	039m42P	248m42P	306m42P	329m42P	333m42P	245m42P	304m42P		001m14P	039m14P	245m14P	248m14P	306m14P	333m14P		24512hKP	24812hKP		3924hKP	24524hKP	24824hKP	30424hKP	30624hKP	32924hKP	33324hKP		03972hKP	24572hKP	30472hKP	30672hKP	32972hKP	33372hKP		001p14P	039p14P	245p14P	304p14P	333p14P		001p100P	245p100P	248p100P	306p100P	333p100P		00112hLP
		Animal	001	039	248	306	329	333	245	304		001	039	245	248	306	333		245	248		392	245	248	304	306	329	333		039	245	304	306	329	333		001	039	245	304	333		001	245	248	306	333		001
		Time point	-42	-42	-42	-42	-42	-42	-42	-42		-14	-14	-14	-14	-14	-14		12hC	12hC		24hC	24hC	24hC	24hC	24hC	24hC	24hC		72hC	72hC	72hC	72hC	72hC	72hC		+14	+14	+14	+14	+14		+100	+100	+100	+100	+100		12hL
Phylum	Family	Genera
Actinobacteria	Actinomycetaceae	Unclassified Actinomycetaceae	0	0	0	0	0	0	0.0774668	0		0	0	0	0.00984446	0	0		0	0.0135049		0	0	0.0183655	0.136067	0	0	0		0	0	0	0	0	0		0	0	0	0	0		0	0	0	0	0		0
	Bifidobacteriaceae	Bifidobacterium	7.77295	0.161917	0.0358551	0	0	0.574621	0	0.0430071		3.17798	0.0897129	0.0247081	0.413467	0.804399	1.40321		0.0640263	3.45647		0	0.147229	0.316804	1.41963	1.19734	1.6037	5.84514		0.256942	39.9799	14.4498	19.6544	14.6365	30.8275		8.30279	2.0767	3.63568	1.0181	4.31833		1.40365	0.268577	1.91077	4.22456	0.146413		0.0482771
	Bifidobacteriaceae	Pseudoscardovia	0.111663	0	0.0239034	0	0.0789833	0	0	0		0	0	0	0	0	0		0	1.72307		0	0	0	0	0	0.0438703	0		0.0296472	0	0	0	0.515724	0		4.15139	0.167476	23.3883	1.74532	0		6.17711	3.64816	1.62786	2.20264	0.292826		0.211212
	Bifidobacteriaceae	Unclassified Bifidobacteriaceae	0	0	0	0	0	0	0	0		0	0	0	0	0	0		0	0		0	0	0	0	0	0	0		0	0	0	0	0	0		0	0	0	0	0		0	0	0	0	0		0
	Coriobacteriaceae	Olsenella	1.08561	4.01554	0.364527	0.954459	0.25131	3.4158	0	0.593497		4.43357	0.956938	0.463278	0.886001	0.540811	1.04818		1.30339	1.12806		0.301952	0.262909	0.77135	0.598694	1.06607	1.19912	2.59937		0.484238	4.50277	1.10784	0.885853	0.487695	5.06611		5.09334	0.7034	19.8526	4.89865	15.5195		4.12323	8.72874	3.74755	3.30208	4.1528		2.25695
	Coriobacteriaceae	Unclassified Coriobacteriaceae	0.533499	1.79728	0.209155	0.305427	0.25131	0.798085	0.551951	0.172028		1.15627	0.867225	0.457101	0.0295334	0.104526	0.236686		1.27138	0.359867		0.851936	0.799243	0.169881	0.154209	0.119336	0.428954	0.536377		0.395296	0.134161	0.264998	0.135245	0.184988	0.854256		0.196062	0.636409	0.1999	0.173294	0.330907		0.970172	0.693823	0.0522307	0.195791	0.598962		0.706053
	Coriobacteriaceae	Denitrobacterium	0.0310174	0.0647668	0	0	0	0.0319234	0	0		0.0567497	0	0	0	0	0		0.0274399	0.00794407		0.086272	0	0.00918274	0.00907112	0	0.0194979	0.0275065		0	0	0.0147221	0.0169056	0	0		0.0426221	0	0.1999	0.0123782	0		0	0	0	0	0.053241		0
	Corynebacteriaceae	Corynebacterium	0	0	0	0	0	0	0	0		0	0	0	0	0	0		0	0.0476644		0	0	0.0229568	0.0498911	0	0	0		0	0	0.0368053	0	0	0		0	0	0	0	0		0	0	0.0304679	0	0		0
	Unclassified Actinobacteria	Unclassified Actinobacteria	0	0	0	0	0	0	0	0		0	0	0	0	0	0		0	0		0	0	0	0	0	0	0		0	0	0	0	0	0		0	0	0	0	0		0	0	0	0	0		0
	Unclassified Actinomycetales	Unclassified Actinomycetales	0	0	0	0	0	0.0798085	0	0		0.0354685	0	0	0	0	0.0507185		0.0548797	0.00714967		0	0	0	0	0	0	0		0	0	0	0	0	0		0	0	0	0	0		0	0	0	0	0		0
	Unclassified Coriobacteriales	Unclassified Coriobacteriales	0	0	0	0	0	0	0	0		0	0	0	0.00984446	0	0		0	0.00397204		0	0	0	0	0	0	0		0	0	0	0	0	0		0	0	0	0	0		0	0	0	0	0		0
Bacteroidetes	Bacteroidaceae	Bacteroides	0	0	0	0	0	0	0	0		0	0	0.0123541	0	0	0		0	0		0	0	0	0	0.0517125	0	0		0	0	0	0.0371923	0	0		0	0	0	0	0		0	0	0	0	0		0
	Marinilabiliaceae	Unclassified Marinilabiliaceae	0	0.0971503	0	0	0	0	0.0290501	0		0	0	0.16678	0	0	0		0.0457331	0.00397204		0	0.0736145	0.00918274	0	0	0	0		0	0	0	0	0	0		0	0	0	0	0		0	0	0	0	0		0
	Porphyromonadaceae	Unclassified Porphyromonadaceae	0	0	0	0	0	0	0	0		0	0	0	0	0	0		0	0		0	0	0	0	0	0	0		0	0	0	0	0	0		0	0	0	0	0		0.0825679	0	0	0	0		0
	Porphyromonadaceae	Porphyromonas	0	0	0	0	0	0	0	0		0	0	0	0	0	0		0	0		0	0	0	0	0	0	0		0	0	0	0	0	0		0	0	0	0	0		0	0	0	0	0		0
	Prevotellaceae	Prevotella	5.63896	4.54987	4.97191	6.01582	6.54843	9.86433	3.78619	1.2472		6.66099	3.06519	4.55865	5.70486	6.60334	5.15638		4.01537	6.59994		2.07053	1.27248	4.65565	4.1455	5.95887	4.75749	3.46582		1.89742	3.24501	4.31358	12.4932	10.5387	3.78101		15.7489	3.41651	0	27.8385	6.22105		23.5215	9.28827	21.8324	16.8568	14.3485		15.1469
	Prevotellaceae	Unclassified Prevotellaceae	19.9007	25.081	22.9951	25.4104	27.1415	17.7973	16.8394	17.3404		19.9333	15.924	24.9923	18.3501	24.7046	18.9687		16.1987	17.1123		10.5252	7.91881	20.7989	20.3828	21.5999	18.1428	13.6295		3.94308	2.50713	23.364	21.7981	27.3726	7.74773		41.987	8.50779	0.162419	18.4651	7.16413		35.6848	14.6822	33.741	33.9019	21.4295		34.9828
	Unclassified Bacteroidales	Unclassified Bacteroidales	11.8486	4.77655	9.64503	10.8372	10.5766	12.5938	11.4845	8.80784		10.1014	9.55443	21.3972	14.1366	14.711	12.612		10.3723	10.591		11.3555	8.27637	7.38751	12.5091	10.9233	8.76432	10.8101		7.34262	7.13567	8.0346	4.93305	6.73244	7.69574		0.890802	11.2376	0.312344	4.10955	2.92852		3.57622	10.6535	2.92057	4.61237	7.29402		5.75705
	Unclassified Bacteroidetes	Unclassified Bacteroidetes	16.6998	14.5887	23.013	25.6995	10.196	14.988	19.8702	20.652		12.7119	24.5813	9.93267	15.9037	17.4877	12.7642		22.6608	8.29044		28.4158	25.5653	13.0257	10.6313	9.31222	6.24909	16.4764		14.0725	8.08318	6.71329	3.37774	5.20209	5.01411		4.67565	18.6568	7.15892	4.57063	8.5043		4.31933	7.11728	4.77911	4.49189	6.88141		7.06053
	Unclassified Bacteroidia	Unclassified Bacteroidia	1.26551	0.825777	0.388431	0.463594	1.10577	0.542698	0.735935	0.920351		1.04987	0.62799	0.772129	1.43729	1.70424	0.43956		3.10985	0.395615		6.2655	2.46083	0.142332	0.816401	0.719997	1.04314	0.550131		3.18213	0.259936	0.776592	0.378685	0.711923	0.155995		0.0170488	3.75147	0	0.0278508	0		0.268346	0	0.0304679	0.602432	0.425928		0
Candidatus Saccharibacteria	Saccharibacteria_genera_incertae_sedis	Unclassified Saccharibacteria_genera_incertae_sedis	1.28412	2.96308	0.292817	0.370875	0.509801	1.21309	0.600368	0.215035		1.17756	3.06519	0.648589	0.68419	0.881658	1.87658		1.39486	1.28376		2.95482	2.36618	0.775941	0.870827	0.254585	0.809164	3.67212		1.21554	3.52172	1.33971	0.304301	1.09872	0.92854		0.0340977	2.57913	0.112444	0.365156	2.23362		0.825679	1.27574	0.121872	0.395346	1.58392		0.905196
	Saccharibacteria_genera_incertae_sedis	Saccharibacteria_genera_incertae_sedis	0	0	0.0776861	0	0	0	0.0871502	0.421469		0.113499	0	0.0741244	0	0.177241	0.321217		0	0.117572		0	0	0.0688705	0.263062	0	0	0.618897		0	0	0	0	0	0		0	0	0	0.0495126	0		0.0825679	0.872874	0	0.0338868	0.49248		0.0543117
Chloroflexi	Anaerolineaceae	Unclassified Anaerolineaceae	0	0	0	0	0	0	0	0		0	0.134569	0	0	0	0		0.100613	0.0150937		0	0	0	0.0498911	0	0	0.233806		0	0	0	0	0	0		0	0	0	0	0		0	0	0	0	0		0
Elusimicrobia	Unclassified Elusimicrobia	Unclassified Elusimicrobia	0	0	0	0	0	0	0	0		0	0	0	0.0590667	0	0		0	0.0309819		0	0	0	0	0	0	0		0	0	0	0	0	0		0	0	0	0	0		0.0670864	2.17099	0.0739935	0.135547	0.665513		0.0724157
Fibrobacteres	Fibrobacteraceae	Fibrobacter	0	0	10.4996	0	0	0	7.4465	13.7881		0	0	0	4.8484	0	0		0	0.943756		0	0	1.69421	3.17943	0	0	0		0	0	0.441664	0	0	0		0	0	0	0.148538	0		0	0	0.76605	0	0		0
Firmicutes	Acidaminococcaceae	Succiniclasticum	0	0	1.08163	0.0327243	0.107704	0.143655	2.88564	4.73078		0.13478	0	0.210019	1.91967	0.036357	0.152156		0.128053	1.83031		0.16176	0.157745	1.0652	2.28592	0.0954692	0.0389959	0.275065		0.197648	0.0754654	3.33088	0	0	0.0519982		0.136391	0.267962	0	2.19712	1.04236		0.0567654	0.313339	0.37432	0.824579	0.745375		0
	Acidaminococcaceae	Acidaminococcus	0	0	0	0	0	0	0.0387334	0		0	0	0	0	0	0		0	0.0293931		0	0	0	0	0	0	0		0	0	0	0	0	0		0	0	0	0	0		0	0	0.330794	0	0		0
	Acidaminococcaceae	Unclassified Acidaminococcaceae	0	0	0	0	0	0	0	0		0	0	0	0	0	0		0	0.0119161		0	0	0	0	0	0	0		0	0	0	0	0	0		0	0	0	0.167105	0		0	0	0.147987	0	0		0
	Clostridiaceae 1	Unclassified Clostridiaceae 1	0.0248139	0	0	0	0	0	0	0		0	0	0.617703	0.698956	0.627159	0		0	0.282015		0	0.11568	0.0734619	0.589623	1.91734	0.151109	0.151286		0	0.285091	0.0515274	9.35556	0.8857	0.148566		0.0298355	0	0	0	0		0.0670864	0	0	0.640084	0.053241		0.102589
	Clostridiaceae 1	Clostridium sensu stricto	0	0	0	0	0	0	0	0		0	0	0	0	0	0		0	0		0	0	0	0	0.397788	0	0		0	0	0	1.85623	0	0		0	0	0	0	0		0	0	0	0	0		0
	Clostridiales_Incertae Sedis XI	Unclassified Clostridiales_Incertae Sedis XI	0	0	0	0	0	0	0	0		0	0	0	0	0	0		0	0		0	0	0	0	0	0	0		0	0	0	0	0	0		0	0	0	0	0		0	0	0	0	0		0
	Clostridiales_Incertae Sedis XIII	Unclassified Clostridiales_Incertae Sedis XIII	0	0	0.0358551	0.103627	0	0	0	0		0.0709371	0.0897129	0	0.0836779	0.0636248	0.202874		0.192079	0.129488		0.172544	0.157745	0.0780533	0.0589623	0	0.224226	0.233806		0.197648	0	0.0515274	0.0405734	0.0952968	0.252563		0.0468843	0.485681	0	0.040229	0		0	0	0.039173	0.0225912	0.0931718		0.0784503
	Clostridiales_Incertae Sedis XIII	Anaerovorax	0	0	0	0	0	0	0	0		0	0	0	0.0246111	0	0		0	0.0985065		0	0	0.0183655	0.04082	0	0	0		0	0	0	0	0	0		0	0	0	0	0		0	0	0.0435256	0	0		0
	Enterococcaceae	Bavariicoccus	0	0	0	0	0	0	0	0		0	0	0.0247081	0	0	0		0	0		0	0	0	0	0	0	0		0	0	0.0699301	0.0371923	0	0		0	0	0	0	0		0	0	0	0.0075304	0		0
	Enterococcaceae	Enterococcus	0	0	0	0	0	0	0	0		0	0	0	0	0	0		0	0		0	0	0	0	0	0	0		0	0	0	0	0	0		0	0	0	0	0		0	0	0	0	0		0
	Erysipelotrichaceae	Sharpea	0	0	0	0	0	0	0	0		0	0	0	0.236267	0	0		0	4.7442		0	0	0.137741	0.0181422	0	0	0		0	0	0.0110416	0	0	0		0	0	0	8.13554	0		0	0	2.72035	5.62521	0		0
	Erysipelotrichaceae	Catenisphaera	0	0	0.0119517	0	0.0215409	0	0	0		0	0	0	0	0	0.0507185		0	0.118367		0	0	0	0.0136067	0	0.0194979	0		0	0	0	0	0	0		0.221635	0.133981	0.287356	0.0216618	7.74322		0.593456	0	0.539717	0.37652	0.239585		0.241386
	Erysipelotrichaceae	Unclassified Erysipelotrichaceae	0	0.0971503	0	0.0490864	0	0.175579	0.0871502	0		0	0	0.0185311	0	0.0318124	0.0507185		0.146346	1.41325		0.032352	0.43117	0	0	0	0.175481	0.137533		0.128471	0.209626	0.132499	0.0980525	0.162565	0.259991		0.0383599	0.602914	0	0.151632	0.215089		0.129012	0.268577	2.38955	0.158138	0.133103		0.0844849
	Erysipelotrichaceae	Turicibacter	0	0	0	0	0	0	0	0.0602099		0	0	0	0	0	0		0	0		0	0	0	0	0	0	0		0	0	0	0	0	0		0	0	0	0	0		0	0	0	0	0		0
	Eubacteriaceae	Unclassified Eubacteriaceae	0	0	0	0	0	0	0	0		0	0	0	0	0	0		0	0		0	0	0	0	0	0	0		0	0	0	0	0	0		0	0	0	0	0		0	0	0.174102	0	0		0
	Eubacteriaceae	Anaerofustis	0	0	0	0	0	0	0	0		0	0	0	0	0	0		0	0		0	0	0	0	0	0	0		0	0	0	0	0	0		0	0	0	0.00618908	0		0	0	0	0	0		0
	Lachnospiraceae	Unclassified Lachnospiraceae	5.61414	5.24611	2.1035	2.77066	2.21153	5.93775	2.22717	3.27714		5.81684	6.57895	2.92174	3.43079	2.79949	13.2713		8.0536	6.57928		8.87523	12.5355	3.27824	5.76016	2.73281	12.3373	7.61931		35.6952	16.1496	4.80677	3.95591	9.84921	11.3728		9.49621	14.0345	12.1814	15.8688	11.0854		3.92713	10.1611	6.11534	5.10938	12.0325		7.73641
	Lachnospiraceae	Butyrivibrio	0.694789	1.27915	0.352576	0.327243	0.380556	0.925778	0.14525	0.189231		1.67412	0.568182	0.432392	0.2658	0.436284	0.405748		0.685997	0.320941		1.0137	1.33558	0.959596	0.884434	0.540992	1.58421	0.151286		0.504002	0.813349	0.548399	0.358399	0.459667	2.06507		0	0.921119	0	0.0835525	0.281271		0.0980493	0.15667	0	0.207086	0.292826		0.440529
	Lachnospiraceae	Syntrophococcus	0	0	0	0	0	0	0	0		0	0	0	0	0	0		0	0.137432		0	0	0	0	0	0	0		0	0	0	0	0	0		0	0	0	0	0		0.0722469	0	0.535365	0.0903648	0.425928		0.162935
	Lachnospiraceae	Lachnospiracea_incertae_sedis	0.0558313	0	0	0	0.258491	0	0	0		0.347592	0.284091	0.0679474	0	0.181785	0.0845309		0	0.327296		0	0	0.105601	0.0317489	0.155137	0.341214	0.0962729		0	0	0.268679	0.216392	0.48209	0		0.11508	0	0.0749625	0.340399	0		0	0.134288	0.0261153	0.0715388	0		0.0905196
	Lachnospiraceae	Pseudobutyrivibrio	0	0.275259	0.0896379	0.125443	0	0.143655	0	0		0.283748	0.403708	0	0.0984446	0.0772587	0.169062		0.150919	0.0508421		0.237248	0.189294	0.105601	0.226778	0	0.0731172	0		0	0	0.0662495	0	0.0840854	0.846828		0	0.368447	0	0.0340399	0		0	0	0	0.0527128	0		0.150866
	Lachnospiraceae	Eisenbergiella	0.0868486	0	0	0	0	0.207502	0	0		0	0.433612	0	0	0	0		0.0868929	0.0182714		0	0	0.114784	0.0680334	0	0	0.0550131		0	0	0.0588885	0	0	0		0	0	0	0.0309454	0		0.0258025	0	0	0.0263564	0		0
	Lachnospiraceae	Roseburia	0	0	0	0	0	0	0	0		0	0	0	0	0	0		0	0.00476644		0	0	0	0	0	0	0		0	0	0	0	0	0		0	0	1.12444	0	0		0	0	0	0	0		0
	Lactobacillaceae	Lactobacillus	0	0	0	0	0	0	0	0		0	0	0.0370622	0	0	0		0	0.0262154		0	0	0.0459137	0	0.0596682	0	0		0	0	0.0220832	0.27049	0	0		0	0	0	0	0		0	0	0	0	0		0
	Leuconostocaceae	Weissella	0	0	0	0	0	0	0	0		0	0	0	0	0	0		0	0.0103273		0	0	0	0	0	0	0		0	0	0	0	0	0		0	0	0	0	0		0	0	0.0130577	0	0		0
	Peptostreptococcaceae	Unclassified Peptostreptococcaceae	0	0	0	0	0	0	0	0		0	0	0	0.0541445	0	0		0	0		0	0	0	0	0	0	0		0	0	0	0	0	0		0	0	0	0	0		0	0	0	0	0		0
	Peptostreptococcaceae	Peptostreptococcus	0	0	0	0	0	0	0	0		0	0	0	0	0	0		0	0		0	0	0	0	0	0	0		0	0	0	0	0	0		0	0	0	0	0		0	0	0	0	0		0
	Peptostreptococcaceae	Romboutsia	0	0	0	0	0	0	0	0		0	0	0	0	0	0		0	0		0	0	0	0	0	0	0		0	0	0	0	0	0		0	0	0	0	0		0	0	0	0	0		0
	Ruminococcaceae	Unclassified Ruminococcaceae	4.72084	6.97863	3.97395	4.78866	4.18611	9.60894	4.73516	3.39756		6.94474	8.67225	3.86682	5.01575	4.19469	10.093		11.7122	7.91627		12.7251	15.4906	5.22039	6.73984	3.71932	28.6668	12.0891		19.2509	7.68908	8.6382	6.18407	10.6788	8.50542		0.25147	11.5391	0.0249875	1.14188	1.77035		4.43802	3.33483	0.365615	2.60552	4.44563		4.92427
	Ruminococcaceae	Ruminococcus	0.204715	0.145725	0.681248	0.163621	0.0646227	0.542698	0.377651	0.275245		0.312123	0.239234	0	0.433156	0.168151	0.371936		0.187506	0.571179		0.16176	0.0420654	0.390266	0.267598	0.0954692	0	0.206299		0	0.251551	0.368053	0.104815	0.0392399	0.103996		0	0	0	0.309454	0.446724		0.10837	0	0.18716	0.361459	0.279516		0.899161
	Streptococcaceae	Unclassified Streptococcaceae	0	0	0	0	0.0143606	0.159617	0	0		0	0	0	0	0.0181785	0		0	0.0301875		0	0	0	0.0181422	0.0636461	0	0.0825196		0	0	0	0.206248	0	1.59709		0.161964	0	0	0	0		0.0361234	0	0	0.018826	0		0.0301732
	Streptococcaceae	Streptococcus	0	0	0	0	0	0	0	0		0	0	0	0	0	0		0.0365865	0.00635526		0	0.0736145	0.0137741	0	0	0.0146234	0.0687663		0.0889416	0.335402	0	0.510549	0.0224228	1.64166		0	0	0	0	0		0	0	0	0	0		0
	Unclassified Clostridia	Unclassified Clostridia	0.595533	0.145725	0.113541	0.114535	1.00524	0.319234	0.513218	0.163427		0.546216	0.747608	0.0741244	0.172278	0.0636248	0.743872		0.910089	0.343978		0.517632	3.03923	0.151515	1.25635	0.194916	2.37875	0.440105		1.18589	0.821734	0.114096	0.290776	0.431639	0.111425		0.136391	0.435438	1.33683	0.00928361	1.02581		0.190938	0.895255	0.156692	0.109191	0.625582		0.446563
	Unclassified Clostridiales	Unclassified Clostridiales	9.72705	11.7228	3.9859	5.18135	7.04387	7.18276	6.41038	9.90022		12.9744	10.8254	4.2498	3.53416	6.11707	10.6002		10.4089	5.99301		9.03699	11.3577	3.9899	5.66038	4.55865	7.40921	12.0204		6.41368	2.93476	4.78101	3.07006	5.43752	8.36428		1.68357	14.7714	19.5527	2.26211	5.44341		5.7075	15.2193	1.65397	5.20351	16.2918		12.0753
	Unclassified Erysipelotrichales	Unclassified Erysipelotrichales	0.0310174	0	0	0.0218162	0	0	0	0		0	0	0	0	0	0		0	0.0309819		0	0	0	0	0	0	0		0	0	0	0	0	0		0	0	0	0.0928361	0		0	0	0.0739935	0.105426	0		0
	Unclassified Firmicutes	Unclassified Firmicutes	0.986352	0.485751	0.687224	0.507227	0.516981	1.02155	0.416384	1.50525		0.76612	0.373804	0.438569	1.28962	1.14979	0.997464		0.996982	1.93756		0.59312	1.23041	0.312213	1.44684	0.477346	2.29588	0.261312		0.53365	0.360557	2.39971	0.324588	1.32294	0.200565		4.60745	0.552671	6.93403	2.89958	20.0695		1.02178	5.55058	1.7889	2.4775	1.0382		0.784503
	Unclassified Selenomonadales	Unclassified Selenomonadales	0	0	0	0	0	0	0	0		0	0	0	0	0	0		0	0.0667302		0	0	0	0	0	0	0		0	0	0	0	0	0		0	0	0	0	0		0	0	0.22198	0.0489476	0		0
	Veillonellaceae	Schwartzia	0.179901	0.178109	0.131469	0.22907	0	0.383081	0	0		0.156062	0	0.0555933	0.0246111	0.122705	0		0.0548797	0.0993009		0.032352	0	0	0.0317489	0.0914913	0.0341214	0.0825196		0	0.142546	0.0699301	0.0642413	0.0952968	0.103996		0.336715	0.452186	0.212394	0.0866471	0.24818		0.31995	0.470009	0	0.124252	0.559031		0.784503
	Veillonellaceae	Dialister	0	0	0	0	0	0	0	0		0	0	0	0	0	0		0	0.217668		0	0	0	0	0	0	0		0	0	0	0	0	0		0	0	0	0.0557017	0		0	0	2.08923	0	0		0
	Veillonellaceae	Unclassified Veillonellaceae	0	0	0.197203	0	0	0	0.290501	0.559092		0	0	0	0.201811	0	0		0	0.169209		0	0	0.151515	0	0	0	0		0	0	0	0	0	0		0.0255733	0	1.86157	0.383723	0.297816		0.0154815	0	0.265506	0	0.0399308		0.066381
	Veillonellaceae	Selenomonas	0	0	0.0896379	0	0	0	0.222717	0		0	0	0	0.103367	0	0		0	0.275659		0	0	0	0	0	0	0		0	0	0	0	0	0		0	0	0	0	0		0	0	1.15778	0	0		0
	Veillonellaceae	Anaerovibrio	0.403226	0	0.370503	0.447232	0.208229	0	0.193667	0.197832		0.219905	0	0.142072	0.137822	0.218142	0		0	0.068319		0	0	0.156107	0	0.13127	0.0974896	0		0	0	0.121457	0.307682	0.151354	0		0	0	0	0	0		0	0	0	0.0715388	0		0
	Veillonellaceae	Megasphaera	0	0	0	0	0	0	0	0		0	0	0	0	0	0		0	0.272482		0	0	0	0	0	0	0		0	0	0	0	0	0		0	0	0	0.0990252	0		0	0	1.24483	0	0		0
	Veillonellaceae	Allisonella	0	0	0	0	0	0	0	0		0	0	0	0	0	0		0	0.0278043		0	0	0	0	0	0	0		0	0	0	0	0	0		0	0	0	0	0		0	0	0.0652884	0	0		0
Fusobacteria	Fusobacteriaceae	Fusobacterium	0	0	0	0	0	0	0	0		0	0	0	0	0	0		0	0		0	0	0	0	0	0	0		0	0	0	0	0	0		0	0	0	0	0		0	0	0	0	0		0
Lentisphaerae	Unclassified Lentisphaerae	Unclassified Lentisphaerae	0	0	0	0.0218162	0	0	0	0		0	0	0	0	0	0		0	0		0	0	0	0	0	0	0		0	0	0	0	0	0		0	0	0	0	0		0	0	0	0	0		0
Proteobacteria	Acetobacteraceae	Unclassified Acetobacteraceae	0	0	0	0	0	0	0	0		0	0	0	0	0	0		0	0		0	0	0	0	0	0	0		0	0	0	0	0	0		0	0	0	0	0		0	0	0	0	0		0
	Campylobacteraceae	Campylobacter	0	0	0	0	0	0	0	0		0	0	0	0.0295334	0	0		0	0.0262154		0	0	0.105601	0.04082	0	0	0		0	0	0	0	0	0		0	0	0	0	0		0	0	0	0	0		0
	Comamonadaceae	Lampropedia	0.0372208	0	0	0	0	0	0	0		0.0638434	1.55502	0	0	0.0954372	0.0507185		0.0457331	0.00873848		0.129408	0	0	0	0	0	0.0550131		0.0592944	0	0	0	0	0		0.0895064	0	0	0	0		0	0	0	0	0		0.0120693
	Desulfobulbaceae	Unclassified Desulfobulbaceae	0.0558313	0	0	0	0	0	0.0484168	0		0.0993119	0.0897129	0.0494163	0	0	0		0.073173	0		0.086272	0.0630981	0	0	0	0	0		0.0592944	0	0	0	0	0		0	0	0	0	0		0.0670864	0.49239	0	0	0		0.0482771
	Enterobacteriaceae	Unclassified Enterobacteriaceae	0	0	0	0	0	0	0	0		0	0	0	0	0	0		0	0		0	0	0	0	0	0	0		0	0	0	0	0	0		0	0	0	0	0		0	0	0	0	0		0
	Neisseriaceae	Unclassified Neisseriaceae	0	0	0	0	0	0	0	0		0	0	0	0	0	0		0	0		0.064704	0	0	0	0	0	0.0550131		0	0	0	0	0	0		0	0	0	0	0		0	0	0	0	0		0
	Pseudomonadaceae	Pseudomonas	0	0	0	0	0	0	0	0		0	0	0	0	0	0		0	0		0	0	0	0	0	0	0		0	0	0	0	0	0		0	0	0	0	0		0	0	0	0	0		0
	Succinivibrionaceae	Ruminobacter	1.55087	0	1.08163	1.67985	8.25734	0	2.0916	1.59126		0.915088	0	1.00068	0.782634	2.29958	0		0	0.493327		0	0	3.57668	0.331096	1.55137	0.0536193	0		0	0	0.180346	0.0608602	0.151354	0		0	0	0	0	0		0	0	0.00870511	0.0414172	0		0
	Succinivibrionaceae	Succinimonas	1.22208	0.728627	2.49193	2.90155	1.55812	2.63368	0.290501	0.154825		1.02859	0.837321	0.630057	0.231345	0.454463	0.524091		0.114333	0.0142993		0	0.0841308	0	0.566945	1.22917	0	0.385091		0	0	0	0.0540979	0	0		0	0	0	0	0		0	0	0	0	0		0
	Succinivibrionaceae	Unclassified Succinivibrionaceae	0	0	0.149396	0	0	0	0.329234	0		0	0	0	0.674345	0	0		0	0.266126		0	0	7.77319	1.82783	0	0	0		0	0	0.397497	0	0	0		0	0	0	0.457992	0		0	0	0	0	0		0
	Succinivibrionaceae	Succinivibrio	0.254342	0	0	0	0.330294	0	0	0		0.106406	0	0.191488	0.191967	0.286312	0		0	0.181125		0	0	0.376492	0	0.290385	0	0		0	0	0.0920132	0	0.0784797	0		0	0	0	0	0		0	0	0.104461	0.214617	0		0
	Unclassified Alphaproteobacteria	Unclassified Alphaproteobacteria	0	0	0	0	0	0	0	0		0	0	0	0	0	0		0	0.0699078		0	0.0630981	0	0	0.067624	0.00974896	0		0	0.0335402	0	0.0642413	0	0		0	0.0837381	0	0	0		0	0	0	0	0		0.199143
	Unclassified Betaproteobacteria	Unclassified Betaproteobacteria	0.663772	0.534326	0.382455	0.387238	0.24413	0.574621	1.44282	3.69861		0.773214	0.912081	1.39601	0.206734	0.690783	0.456467		0.699716	0.0452812		0.258816	0.683563	0.238751	0.2041	0.803532	0	0.522624		0.138354	0	0.0441664	0.378685	0.112114	0.118853		0	0.251214	0	0	0		0	0	0	0	0		0.0181039
	Unclassified Burkholderiales	Unclassified Burkholderiales	0.0434243	0	0	0	0	0	0	0.0946155		0.106406	0	0	0	0	0		0.073173	0		0	0	0	0	0	0	0		0	0	0	0	0	0		0	0	0	0	0		0.0412839	0	0	0	0		0
	Unclassified Deltaproteobacteria	Unclassified Deltaproteobacteria	0	0	0	0	0	0	0.125884	0.12042		0	0	0	0	0	0		0	0		0	0	0	0	0	0	0		0	0	0	0	0	0		0	0	0	0	0		0	0	0	0	0		0
	Unclassified Gammaproteobacteria	Unclassified Gammaproteobacteria	0.936725	3.86982	0.209155	0.272702	8.34351	2.85714	0.978019	0.404266		1.49677	2.07835	5.35549	3.09116	2.12234	2.29924		0.480198	5.89768		0.194112	0.368072	7.60331	6.97569	16.3372	0.219352	0.907716		0.28659	0.259936	4.88038	1.2713	0.997814	0		0	0.619662	0	0	0		0	0	0.300326	0.46312	0		0
	Unclassified Proteobacteria	Unclassified Proteobacteria	1.17246	4.2908	1.21907	1.06354	4.12149	1.69194	2.61451	1.35042		0.38306	1.24103	3.10087	2.67769	1.60425	0		1.11131	0.834128		1.31565	0.788726	4.47199	3.31549	9.1014	0.224226	1.4716		0.138354	0	2.59845	0.622126	0	0.490269		0.11508	0.904371	0	0.0185672	0		0.0670864	0.0447628	0.039173	0.0075304	0.106482		0.265524
Spirochaetes	Spirochaetaceae	Treponema	0	0	0.400382	0.747205	0.323113	0	0.648785	0		0	0	0.864785	2.22485	0.708962	0		0	0.892914		0	0	2.24518	1.71898	0.60066	0.0731172	0		0	0	0.894369	0.649175	0.667078	0		0	0	0	0	0		0	0	0.0130577	0.474415	0		0
	Spirochaetaceae	Unclassified Spirochaetaceae	0	0	0	0	0	0	0.0290501	0		0	0	0.129718	0.0393778	0	0		0	0.0476644		0	0	0.0183655	0	0	0	0		0	0	0.0220832	0	0	0		0	0	0	0	0		0	0	0	0.0489476	0		0
	Unclassified Spirochaetales	Unclassified Spirochaetales	0	0	0.256962	0.190892	0.215409	0	0.290501	0		0	0	0.382976	0.379012	0.499909	0		0	0.157293		0	0	0.459137	0.145138	0.18696	0.0633683	0		0	0	0.117777	0	0	0		0	0	0	0	0		0	0	0	0.0338868	0		0
	Unclassified Spirochaetia	Unclassified Spirochaetia	0	0	0	0	0	0	0	0		0	0	0	0.0836779	0	0		0	0		0	0	0	0	0	0	0		0	0	0	0	0	0		0	0	0	0	0		0	0	0	0	0		0
SR1	SR1_genera_incertae_sedis	Unclassified SR1_genera_incertae_sedis	1.37717	1.73251	0.705151	0.807199	0.919078	1.78771	0.677835	0.91175		0.943463	1.64474	0.870962	0.497145	0.413561	1.80896		1.09302	0.320146		0.345088	1.95604	0.541781	0.589623	0.278452	0	1.70541		0.0889416	0.243166	0.158263	0.0439546	0	0.698262		0.00852442	0	0	0.120687	0.148908		0.0928888	3.02149	0	0.240973	1.19792		0.500875
	SR1_genera_incertae_sedis	SR1_genera_incertae_sedis	0	0	0.561731	0.48541	0	0	0.426068	0		0	0	0.426215	0.511912	0.168151	0		0	0.205752		0	0	0.344353	0.2041	0	0	0		0	0	0.125138	0	0	0		0	0	0	0.13616	0		0	0	0.326442	0	0		0
Synergistetes	Synergistaceae	Unclassified Synergistaceae	0	0	0	0	0	0	0	0.0344056		0.13478	0	0.117364	0	0	0		0	0		0	0	0	0	0	0	0		0	0	0	0	0	0		0	0	0	0	0		0	0	0	0	0		0
Tenericutes	Anaeroplasmataceae	Anaeroplasma	0.744417	1.14961	0.549779	0.474502	0.0861636	0.175579	0.881185	0.249441		1.36909	1.27093	1.08716	0.90569	0.331758	0.473373		0.553371	0.662536		0.560768	0	1.00551	0.394594	0.433589	0.0633683	0.357585		1.2353	0	0.504233	0.622126	0.100903	0.557124		0	0.117233	0	0.0526071	0		0	0	0	0.707858	0.319446		0
	Anaeroplasmataceae	Asteroleplasma	0	0	0.0298793	0	0	0	0.0484168	0		0	0	0.549756	0.349478	0.190874	0		0.00914662	0.212107		0	0	0.0780533	0.0861756	0.202872	0	0		0	0	0.312845	1.81566	0	0		0	0	0	0.495126	0.529451		0.0670864	0.134288	0.661589	0.542189	0.106482		0.0724157
	Anaeroplasmataceae	Unclassified Anaeroplasmataceae	0	0	0.119517	0.130897	0	0	0.513218	0		0	0	0.358268	0.374089	0.413561	0		0	0.144582		0	0	0.243343	0.0816401	0.250607	0	0		0	0	0.117777	0.0980525	0	0		0	0	0	0	0		0	0	0	0.0715388	0		0
	Unclassified Anaeroplasmatales	Unclassified Anaeroplasmatales	0.0620347	0.145725	0	0	0	0	0.280817	0		0.0993119	0.657895	0.172957	0	0.0409017	0.202874		0.0914662	0.00635526		0	0	0.0275482	0.0907112	0.103425	0	0.0550131		0.0889416	0	0.0478469	0.0912902	0	0.0817115		0	0.150729	0	0	0		0	0	0	0	0		0
	Unclassified Mollicutes	Unclassified Mollicutes	0	0	0	0	0	0	0	0		0	0	0	0	0	0		0	0.0111217		0	0	0	0.12246	0	0	0		0	0	0.128819	0	0	0		0	0	0	0	0		0	0	0	0.0451824	0		0
Unclassified Bacteria	Unclassified Bacteria	Unclassified Bacteria	2.33871	2.07254	5.4201	5.86856	2.92238	1.62809	8.23085	2.93308		1.62446	1.62978	6.65884	6.55149	5.65352	2.11327		1.2851	3.20305		0.657824	0.694079	4.65565	2.64423	2.10828	0.389959	2.04924		0.889416	0.0251551	2.6095	2.96186	0.190594	0.356559		1.35965	1.57428	1.38681	0.878849	2.43216		1.75457	0.402865	4.19151	1.81483	2.60881		2.58283
Verrucomicrobia	Subdivision5_genera_incertae_sedis	Unclassified Subdivision5_genera_incertae_sedis	0.0434243	0	0	0.0490864	0	0	0	0		0	0	0	0	0	0		0	0.00794407		0	0	0	0.0453556	0.0198894	0	0		0	0	0	0	0.0224228	0		0	0	0	0	0		0	0	0	0	0		0
[truncated: 35 more columns]

## Sheet: Genera_Duodenum
Supplementary Data 2
Genera Duodenum
Relative abundance (%) of genera on animal individual level and at varying time points.
		ID	001m42D	333m42D	039m42D	245m42D	248m42D	304m42D	306m42D	329m42D		001m14D	039m14D	245m14D	248m14D	304m14D	306m14D	333m14D		03912hKD	24512hKD	30412hKD	32912hKD	33312hKD		00124hKD	03924hKD	24524hKD	30424hKD	30624hKD	32924hKD	33324hKD		03972hKD	24572hKD	30472hKD	30672hKD	33372hKD		001p14D	039p14D	245p14D	304p14D	333p14D		001p100D	245p100D	248p100D	304p100D
		Animal	001	333	039	245	248	304	306	329		001	039	245	248	304	306	333		039	245	304	329	333		001	039	245	304	306	329	333		039	245	304	306	333		001	039	245	304	333		001	245	248	304
		Time point	-42	-42	-42	-42	-42	-42	-42	-42		-14	-14	-14	-14	-14	-14	-14		12hC	12hC	12hC	12hC	12hC		24hC	24hC	24hC	24hC	24hC	24hC	24hC		72hC	72hC	72hC	72hC	72hC		p14	p14	p14	p14	p14		p100	p100	p100	p100
Phylum	Family	Genera
Actinobacteria	Bifidobacteriaceae	Bifidobacterium	3.57006	0.118343	0	0.282924	2.8986	0	0	0		1.50415	0.258532	0	1.34553	0.3519	4.4176	1.84262		0.0494288	0.329276	6.84495	5.80763	8.50518		1.81906	0.155646	0.239114	5.80068	17.4237	1.50137	3.96263		0.025642	24.8406	12.9375	33.1089	17.8337		1.1432	5.10344	2.02539	4.16801	1.02519		0.671833	0.155159	3.93936	0.216049
	Bifidobacteriaceae	Pseudoscardovia	0	0	0	0	0.617323	0	0	0		0	0	0.123001	0	0.0703801	0	0.0144519		0	0	0	0	0		0	0	0	0	0	0.0433088	0		0	0.0424938	0	0	0.0750892		1.04212	0	2.77592	7.32218	0		2.24828	0.800039	3.59774	0.0462963
	Coriobacteriaceae	Olsenella	1.68099	0.852071	0.797814	0.0638861	5.60291	0	0.816208	0.0314391		0.812586	0.7394	1.00451	1.46394	0.774181	0.335067	0.650336		0.247144	0.658551	0.422929	0.315284	0.811594		0.295102	0.3615	0.302039	0.377989	0.461894	0.281507	0.903075		0.300377	3.04741	0.495939	0.950495	0.807209		0.912154	0.613259	2.80677	33.5747	4.56931		2.66376	4.30081	8.00683	24.0278
	Coriobacteriaceae	Unclassified Coriobacteriaceae	0.257351	0.16568	0.153005	0.292051	0.777137	1.10454	0.422679	0.35369		0.211791	0.604964	0.563756	0.193757	0.452443	0.238074	0.137293		0.461336	0.498902	0.741753	0.365547	0.380952		0.0220226	0.517146	0.0755097	0.8214	0	0.563014	0.0155703		0.252757	0.22461	0.309063	0	0.043802		0.0312876	0.556867	0.205624	1.96331	0.253655		0.138492	0.300621	0.0640547	0
	Bifidobacteriaceae	Unclassified Bifidobacteriaceae	1.73027	0	0.0273224	0	0	0	0	0.243653		0.146957	0.263702	0	0	0.21114	0	0.245682		0.0164763	0.129715	0	0.0411241	0.190476		0.422833	0.030125	0.10068	0.109035	0	0.0721813	2.4601		0.113557	0	0	0	0.225268		0.0312876	0.109259	0.0385545	0.107285	0.147965		0.200371	0.145462	0	0
	Unclassified Actinobacteria	Unclassified Actinobacteria	0	0	0	0.74838	0.0814741	0	0	0		0.0734786	0.263702	0.512505	0.279871	0	0	0		0	0.209539	0	0	0		0	0.06025	0.201359	0	0	0	0.0467108		0.172167	0	0	0	0		0	0	0.0282733	0	0		0.0147332	0.0678821	0.224191	0
	Corynebacteriaceae	Corynebacterium	0	0	0	0	0.0846077	0	0	0		0	0.0103413	0	0	2.36276	0	0		0	0	0.0520528	0.0319854	0		0	0	0	0.0218071	0	0	0		0.0109894	0.0424938	0	0.0528053	0		0	0	0.0231327	0.123377	0		0	0	0	0
	Unclassified Actinomycetales	Unclassified Actinomycetales	0	0.236686	0	0.0365063	0	0	0	0		0.138313	0.041365	0	0.0753498	0.160869	0	0		0.164763	0	0	0	0.15735		0.0308316	0.0853542	0	0	0	0	0		0	0	0	0	0.0375446		0	0.225567	0.0719683	0	0		0	0	0	0
	Unclassified Coriobacteriales	Unclassified Coriobacteriales	0	0	0	0	0.0125345	0.029067	0.0437254	0		0.00864454	0	0	0	0	0.0440878	0		0	0	0.0260264	0	0		0	0	0	0	0	0	0		0	0	0	0	0		0	0	0.0051406	0.0482781	0		0	0	0	0
	Coriobacteriaceae	Denitrobacterium	0	0	0	0	0.0125345	0.0484449	0	0		0	0.0258532	0	0	0.0201086	0	0		0	0	0	0	0		0	0	0	0	0	0.0144363	0		0.00732628	0.0182116	0	0	0		0	0	0.0179921	0	0		0	0	0	0
	Actinomycetaceae	Unclassified Actinomycetaceae	0	0	0	0	0	0	0	0.0628783		0	0	0	0	0	0	0		0	0	0	0	0		0	0	0	0	0	0	0		0	0	0	0	0		0	0	0	0	0		0	0	0	0
Bacteroidetes	Prevotellaceae	Prevotella	4.17785	5.79882	4.27869	1.48763	5.00125	2.06375	5.23247	2.38151		3.66096	2.7818	2.08077	3.49839	1.82988	1.90459	2.96987		2.55382	2.52445	2.69373	5.14051	4.19048		0.929352	1.38575	2.47923	1.49742	2.36079	5.83225	4.16504		2.23451	5.54847	2.73845	8.17162	6.79557		11.1336	4.2047	5.08919	0.10192	25.4959		13.9847	9.94472	3.03192	0.339506
	Prevotellaceae	Unclassified Prevotellaceae	20.4293	9.01775	17.1639	10.4408	6.09175	6.47224	13.3217	12.387		15.5645	13.3816	9.85035	7.76103	7.20893	6.78071	17.0171		17.1079	11.1654	6.32442	15.3301	13.9627		7.30268	13.8123	12.5094	5.8661	10.4439	15.7644	17.789		15.5097	8.07989	7.19471	12.1848	13.879		29.2972	18.2497	34.0667	0.128742	22.1173		17.3616	32.307	16.8998	24.6605
	Unclassified Bacteroidales	Unclassified Bacteroidales	9.62602	18.3432	7.97814	6.75367	8.27588	14.456	9.32809	13.4245		10.2611	12.5336	9.7786	9.94618	10.1951	10.7927	14.1484		11.4785	7.90261	9.38903	9.0016	12.7619		2.6339	10.8149	7.1105	11.1434	6.18424	8.27198	11.2106		10.8392	6.82936	9.23597	3.47195	12.5774		0.998797	13.2133	4.35665	0.407682	4.19588		5.38645	7.24399	2.76503	0.339506
	Unclassified Bacteroidetes	Unclassified Bacteroidetes	10.4364	12.7101	12.6831	19.9872	11.8482	11.6849	14.7063	14.8235		9.55654	10.6618	12.3206	13.0678	11.6127	16.8945	15.7309		14.252	16.6833	12.1804	7.95979	11.7019		1.53277	14.9822	17.5308	12.5754	12.0092	7.644	9.39665		12.0151	5.15996	6.72752	4.43564	7.50892		2.08664	10.3338	7.46157	1.38397	6.48582		3.76875	6.34213	4.68667	3.22531
	Unclassified Bacteroidia	Unclassified Bacteroidia	0.481849	0.0710059	1.53005	2.06261	0.799072	0.726674	0.393529	0.558044		1.43067	1.68563	1.50677	0.947255	0.191032	0.476148	0.917696		2.27373	1.56655	0	1.38908	0.960663		0.0880902	3.08279	1.8374	0.0654212	0.513215	1.60243	0.5761		2.61548	0.588842	0.0934378	0.382838	0.800951		0.0361011	2.98523	0.244178	0	0.0317069		0.347703	0.0969744	0.0533789	0
	Porphyromonadaceae	Porphyromonas	0.498275	0	0	0	0	0	0	0.0314391		0.0129668	0.0258532	0	0	0	0	0		0.060413	0	0	0	0		7.41279	0.125521	0.113265	0	0	0	0.0311405		0.0183157	0	0	0	0		0	0	0	0	0		0	0	0	0
	Bacteroidaceae	Bacteroides	0.208071	0	0	0	0	0	0	0.0785978		0.0216113	0	0	0	0	0	0		0	0	0	0.00913868	0		5.69503	0	0	0	0	0	0		0.00732628	0	0	0	0		0.0433213	0	0	0	0		0.0383063	0	0	0
	Marinilabiliaceae	Unclassified Marinilabiliaceae	0	0	0.114754	0.100392	0	0	0	0		0	0	0.440754	0	0	0	0		0.0219684	0.169627	0	0	0		0	0.030125	0.176189	0	0	0	0		0.0293051	0	0	0	0		0	0	0	0	0		0	0	0	0
	Porphyromonadaceae	Unclassified Porphyromonadaceae	0	0	0	0	0	0	0	0		0	0	0	0	0	0	0		0	0	0	0	0		0	0	0	0	0	0	0		0	0	0	0	0		0	0	0	0	0		0.0147332	0	0	0
Candidatus Saccharibacteria	Saccharibacteria_genera_incertae_sedis	Unclassified Saccharibacteria_genera_incertae_sedis	0.180693	0.213018	0.153005	0.228165	0.347832	0	0	0.133616		0.0994122	0.667011	0.123001	0.527449	0.995375	0	0.411879		0.346002	0.169627	0.416423	0.0502627	1.29193		0	0.466938	0.151019	0.66875	0.513215	0.288725	0.194628		0.131873	1.07449	1.07094	0	0.0938615		0	0.465231	0.131085	0	0.373437		0.235731	0.387898	0.40568	0
	Saccharibacteria_genera_incertae_sedis	Saccharibacteria_genera_incertae_sedis	0	0	0	0	0	0.232536	0	0		0	0	0.0922509	0	0	0.132263	0		0	0	0.201705	0	0.26501		0	0	0	0.755979	0	0	0		0	0	0	0	0		0	0	0	0	0		0	0.087277	0	0
Chloroflexi	Anaerolineaceae	Unclassified Anaerolineaceae	0.235449	0.189349	0.163934	0.127772	0.0689396	0	0	0.0471587		0	0.0775595	0	0.247578	0	0	0.0505817		0	0.0598683	0	0	0		0	0	0	0	0	0	0.28805		0.0476208	0	0	0	0.150178		0	0.0105734	0.120804	0	0		0	0	0	0
Elusimicrobia	Unclassified Elusimicrobia	Unclassified Elusimicrobia	0	0	0	0	0.0501379	0	0	0		0	0	0	0	0	0	0		0	0	0	0	0		0	0	0	0	0	0	0		0	0	0	0	0		0	0	0	0	0		0.0176798	0.552754	0.149461	0
Fibrobacteres	Fibrobacteraceae	Fibrobacter	3.9643	0	8.48634	14.4474	0.0313362	0	0	7.52181		9.22372	8.71251	8.34358	0	0	0	0		7.84271	5.48793	0	2.26182	0		0.0396406	6.71286	3.42311	0	0	0	0		3.13565	2.5557	0	0	0		0.690734	6.25242	1.62443	0	0		1.04606	0.0678821	0.384328	0
Firmicutes	Acidaminococcaceae	Succiniclasticum	2.58446	5.04142	3.11475	3.03003	3.00201	8.2647	3.35228	0		2.36428	2.92658	4.26404	4.43488	5.92198	10.0256	0.180649		2.86138	5.44801	5.38096	0	0.190476		0.215821	2.54054	1.24591	5.94606	8.49371	0	0.062281		1.89751	3.0899	4.5497	5.66337	0		0.709988	4.55715	1.54732	3.1488	0.584816		0.919351	1.71645	0.597843	0.66358
	Clostridiaceae 1	Clostridium sensu stricto	0	0	0	0	0.131612	0	0.0874508	0		0.0129668	0	0	0	0.0402172	0	0		0	0	0.032533	0	0		40.5964	0	0.390133	0	0	0	0.560529		0	0	0	0	0		0	0	0.00771089	0	0		0	0	0	0.0462963
	Erysipelotrichaceae	Catenisphaera	0	0	0	0	1.59814	0	0	0		0.00864454	0	0.184502	0.0861141	0	0	0		0	0	0	0	0		0	0.0150625	0	0	0	0	0		0.0183157	0	0	0	0.0250297		0.0409146	0	3.4185	0	1.57478		0.312343	1.08126	2.18853	0
	Erysipelotrichaceae	Unclassified Erysipelotrichaceae	0	0.118343	0.0874317	0.164279	0.103409	0.029067	0	0		0.125346	0.0258532	0	0.0538213	0.0301629	0.158716	0.0433557		0.0439367	0.0598683	0.38389	0.109664	0.149068		0.0264271	0.0451875	0.125849	0.254416	0.0769823	0.11549	0.108992		0.0659365	0.261033	0.373751	0.184818	0.087604		9.95187	0.0986854	0.0282733	1.36788	0.725735		1.41733	0.033941	0.0747304	0.277778
	Lachnospiraceae	Butyrivibrio	1.27033	2.67456	1.0929	1.62453	2.06192	4.27284	3.61463	1.21041		1.10218	0.506722	1.47601	1.58235	0.864669	2.57473	1.25732		0.70848	1.07763	0.923938	1.91912	0.273292		0	0.512125	0.742512	2.20252	2.28381	1.75401	0.350331		0.699659	0.509925	2.14907	1.05611	1.80214		0	0.81063	0.475505	0.0643708	0.10569		0.150278	0.26668	0.0854062	0
	Lachnospiraceae	Unclassified Lachnospiraceae	7.18392	9.11243	2.99454	9.09921	14.2893	13.8552	20.1428	5.10886		5.67514	8.00414	8.50759	17.8794	11.3915	14.3285	9.48768		7.24956	6.82499	16.5593	10.578	5.49896		0.422833	8.14882	5.52479	15.8101	16.5512	10.4879	5.03698		14.4438	14.2051	16.9769	15.6304	11.7702		12.7148	8.31424	13.5429	27.2449	11.4885		10.6285	16.2238	26.4653	25.2778
	Ruminococcaceae	Ruminococcus	0.908942	1.04142	0.0874317	0	1.05916	1.45335	0.160326	0.259373		0.51435	0.253361	0.0615006	1.03337	0.764126	0.0529054	0.37575		0.214192	0.0698463	0.572581	0.219328	0.256729		0	0.210875	0.151019	0.588791	0	0.339252	0.280265		0.219788	0.843805	1.35844	0	0.143921		0	0.941035	0.138796	0.0750992	0.169103		0.530395	0.887316	1.14231	0
	Ruminococcaceae	Unclassified Ruminococcaceae	5.20177	11.3846	9.55191	6.06005	8.73339	10.0959	7.41874	4.48794		6.78596	12.0321	13.6634	12.3466	15.0915	6.66608	11.0196		12.9119	10.3971	14.4772	14.9692	13.6398		0.977801	17.6733	9.37579	13.6585	6.87708	13.5268	10.0428		18.5465	4.07333	16.8619	2.9967	10.3122		0.113117	5.39245	3.34653	1.90967	0.627092		3.09691	2.6571	1.27042	0.138889
	Unclassified Clostridiales	Unclassified Clostridiales	6.69112	10.8402	5.66667	8.7889	11.4408	13.5258	14.1525	5.65118		6.23271	7.29576	9.8401	10.1292	13.3119	17.7674	6.41665		5.80514	6.92477	10.827	4.16724	6.64182		0.999824	5.78902	5.6003	9.20986	9.98204	5.096	4.29739		3.93055	6.62296	6.93596	8.44884	4.93711		1.17208	6.74937	6.819	10.0365	3.00511		4.76471	6.44395	7.06736	0.910494
	Unclassified Firmicutes	Unclassified Firmicutes	0.64064	0.591716	0.699454	1.06781	1.98358	0.639473	0.991109	0.37727		1.23617	1.20993	1.03526	1.19483	1.69918	1.20801	0.657562		1.05448	1.30712	0.949964	2.49943	0.728778		0.0616631	1.50123	2.76869	0.886821	0.744162	2.46138	0.443752		1.28942	0.7831	1.25063	0.514851	0.275327		0.832732	0.528672	0.881612	3.27218	4.12894		0.966497	1.71645	3.99274	8.75
	Unclassified Clostridia	Unclassified Clostridia	0.0766577	0	0.20765	0.593228	0.394836	0.319736	0.393529	0.510886		0.207469	0.589452	0.348503	0.322928	0.462497	0.299797	0.419105		0.335018	0.429056	2.12766	0.379255	0.057971		0	0.532209	1.66121	1.99171	0.384911	1.14768	0.0311405		0.410271	0.370303	0	0.39604	0.0312872		0	0.23614	0.254459	0	0.260701		0.159118	0.552754	1.31312	0
	Erysipelotrichaceae	Sharpea	0.186169	0	0	0	0	0	0	0		0.397649	0	0	0	0	0	0		0	0	0	0	0		0.0396406	0	0	0	0	0	0		0	0	0	0	0.0187723		0.401925	0	0	0	1.7932		0.742552	0	0	0
	Clostridiaceae 1	Unclassified Clostridiaceae 1	0	0	0	0	1.00589	0.029067	0	0		0.0389004	0	1.24026	2.48654	0.0904886	0	0.0361298		0	0.0798244	0.845859	0.607722	0.190476		0.0308316	0	0.390133	1.3375	0	0.512487	0.194628		0.0146526	0.139622	0.733127	0	0.225268		0	0	0	0	0		0.182691	0	0.106758	0
	Lactobacillaceae	Lactobacillus	0.131413	0	0	0	0.495112	0.019378	0	0.0235793		0.047545	0	0	0.0753498	3.90107	0	0.0361298		0.181239	0	0.396903	0.0456934	0		0.27308	0	0	0	1.15473	0.454742	0.0155703		0	1.09877	0.510314	0.0528053	0		0.0770156	0.281958	0.0128515	0.166291	0		0.232784	0	0.096082	2.0216
	Acidaminococcaceae	Acidaminococcus	0.607786	0	0	0	0.379168	0	0	0		0	0	0	0.0645856	0	0	0		0	0	0.032533	0	0		0.167371	0	0	0	0	0	0		0	0	0	0	0		0.12515	0	0.0642574	0	0		0.212158	0.460628	3.19206	3.34877
	Clostridiales_Incertae Sedis XIII	Unclassified Clostridiales_Incertae Sedis XIII	0.125938	0.426036	0.0382514	0.155152	0.426172	0.329425	1.02026	0.0864576		0.0691563	0.0723888	0.297253	0.387513	0.341846	0.414426	0.195101		0.153779	0.0598683	0.370876	0.0502627	0.215321		0	0.105438	0	0.356182	0.205286	0.173235	0.0856364		0.0586102	0.0424938	0.14375	0.264026	0.0375446		0.0120337	0.200895	0.205624	0.954833	0.00704597		0.0854525	0.0387898	0.0533789	0
	Lachnospiraceae	Syntrophococcus	0	0	0	0.118646	0.269491	0	0.102026	0		0.0518672	0.0827301	0	0	0	0	0		0.0768893	0	0.0715726	0	0		0	0.0351459	0	0	0	0	0		0.025642	0	0	0	0		0	0	0	0	0.0352299		0.109026	0.3782	0.27757	0
	Lachnospiraceae	Pseudobutyrivibrio	0.399715	0.52071	0.136612	0.529342	0.460642	0.358492	1.06398	0.180775		0.311203	0.274043	0.256253	0.322928	0.402172	0.705405	0.158971		0.175747	0.219517	0.234238	0	0		0	0.205854	0	0.705096	0.898127	0	0.124562		0	0	0.517502	0	0.669545		0	0.151553	0.0796792	0	0		0	0	0	0
	Veillonellaceae	Dialister	0.711822	0	0	0	0	0	0	0		0.0302559	0	0	0	0	0	0		0	0	0	0	0		0.0792812	0	0	0	0	0	0		0	0	0	0	0		0	0	0	0	0		0.0795592	0	0	0
	Unclassified Selenomonadales	Unclassified Selenomonadales	0.279253	0	0	0	0.109677	0	0	0		0	0	0	0	0	0	0		0	0	0	0	0		0	0	0	0	0	0	0		0	0	0	0	0		0.055355	0	0.0205624	0	0		0.206265	0.475175	1.24907	2.4537
	Veillonellaceae	Megasphaera	0.509226	0	0	0	0	0	0	0		0.00864454	0	0	0	0	0	0		0	0	0	0	0		0.0616631	0	0	0	0	0	0		0	0	0	0	0		0	0	0	0	0		0	0	0	0
	Lachnospiraceae	Lachnospiracea_incertae_sedis	0.0711822	0	0.431694	0	0	0	0	0		0.306881	0.289555	0.123001	0	0	0.0705405	0.0867115		0	0.149671	0	0.27873	0.0662526		0	0	0.0629247	0	0.205286	0	0.147917		0	0	0	0.039604	0.087604		0.233454	0	0.069398	0.160927	0.369914		0.0736659	0.0824282	0	0.817901
	Clostridiales_Incertae Sedis XIII	Anaerovorax	0.0711822	0	0	0.109519	0.14728	0.629784	0	0		0.0605118	0.258532	0.287003	0.0538213	0.180977	0.511419	0		0.26362	0.169627	0.416423	0	0		0	0.271125	0	0.239878	0.33359	0	0		0.131873	0.0607054	0.107813	0.171617	0		0.0192539	0.274909	0.120804	0.740264	0		0.0265197	0	0	0
	Veillonellaceae	Unclassified Veillonellaceae	0.383289	0	0	0.264671	0.191151	0.261603	0	0		0.0691563	0.0723888	0	0	0.191032	0.158716	0		0	0	0.065066	0	0		0	0	0	0.138112	0.153965	0	0		0.0732628	0.194257	0.488752	0	0		0.170878	0.225567	0.192772	0	0.0387529		0.235731	0.0145462	0	0.0771605
	Lachnospiraceae	Roseburia	0	0	0	0	0.0814741	0	0	0		0	0	0	0	0	0	0		0	0	0	0	0		0	0	0	0	0	0	0		0	0	0	0	0		0.0120337	0	0.550044	0	0		0.0383063	0.499418	0.256219	1.38889
	Veillonellaceae	Schwartzia	0	0.236686	0	0	0.0438706	0	0	0.0392989		0.047545	0	0	0	0	0	0		0.0219684	0	0	0.013708	0		0	0	0	0	0.0769823	0	0		0	0	0	0.105611	0.0250297		0.0649819	0.109259	0.025703	0.144834	0.0598908		0.0677726	0.0678821	0.0640547	0.29321
	Peptostreptococcaceae	Unclassified Peptostreptococcaceae	0	0	0	0	0	0	0	0		0	0	0	0	0	0	0		0	0	0	0	0		4.36487	0	0	0	0	0	0		0	0	0	0	0		0	0	0	0	0		0	0	0	0
	Erysipelotrichaceae	Turicibacter	0	0	0	0	0.0344698	0	0	0		0	0	0	0	0	0	0		0.0109842	0	0	0	0		0.303911	0	3.62447	0	0	0	0		0	0	0	0	0		0	0.0211469	0.0128515	0	0		0	0	0	0
	Unclassified Erysipelotrichales	Unclassified Erysipelotrichales	0.0383289	0	0	0	0.0156681	0	0	0		0.0129668	0	0	0	0	0	0		0	0	0	0	0		0	0	0	0	0	0	0		0	0	0	0	0		0.163658	0	0	0	0		0.0707193	0.00969744	0	0
	Peptostreptococcaceae	Romboutsia	0	0	0	0	0	0	0	0		0	0	0	0	0	0	0		0	0	0	0	0		3.19767	0	0	0	0	0	0		0	0	0	0	0		0	0	0	0	0		0	0	0	0
	Eubacteriaceae	Unclassified Eubacteriaceae	0	0	0	0	0.0376034	0	0	0		0	0	0	0	0	0	0		0	0	0	0	0		0	0	0	0	0	0	0		0	0	0	0	0		0.23586	0	0	0.193112	0		0.229838	0.145462	0.106758	0.0617284
	Veillonellaceae	Allisonella	0	0	0	0	0.0438706	0	0	0		0	0	0	0	0	0	0		0	0	0	0	0		0	0	0	0	0	0	0		0	0	0	0	0		0	0	0.0462654	0	0		0.0441995	0.160008	0.138785	0.246914
	Clostridiales_Incertae Sedis XI	Unclassified Clostridiales_Incertae Sedis XI	0.0109511	0	0	0	0	0	0	0		0	0	0	0	0	0.0176351	0		0	0	0	0	0		2.55902	0.0251042	0	0	0	0	0.0389257		0	0	0	0	0		0	0	0	0	0		0	0	0	0
	Veillonellaceae	Selenomonas	0	0	0	0	0	0	0	0		0.108057	0	0	0	0	0	0		0	0	0	0	0		0	0	0	0	0	0	0		0	0	0	0	0		0.563177	0	0	0	0		0.256357	0	0	0
	Peptostreptococcaceae	Peptostreptococcus	0.0383289	0	0	0	0	0	0	0		0	0.0103413	0	0	0	0	0		0.0164763	0	0	0	0		2.30796	0	0	0	0	0	0		0	0	0	0	0		0	0	0	0	0		0	0	0	0
	Lachnospiraceae	Eisenbergiella	0	0	0	0.100392	0.0940085	0.251914	0	0		0	0.139607	0	0	0	0	0		0.13181	0	0	0	0		0	0	0.176189	0	0	0	0.0934216		0.150189	0.103199	0.129375	0	0		0	0.0951609	0	0	0		0.0500928	0	0	0
	Streptococcaceae	Streptococcus	0	0	0	0	0	0	0.0874508	0		0	0.0103413	0	0	0	0	0		0.0219684	0	0.104106	0.0228467	0.0496894		0.145349	0	0	0.0218071	0	0.0433088	0.0544959		0	0.242822	0	0.422442	0.406733		0	0	0	0	0		0	0	0	0
	Streptococcaceae	Unclassified Streptococcaceae	0	0.118343	0	0.0365063	0.0626723	0.0387559	0	0		0	0	0	0	0	0	0		0	0	0.0260264	0	0.0993789		0	0	0	0	0	0	0		0	0	0	0	0.469307		0.0120337	0	0	0	0.0176149		0	0	0.0213516	0
	Enterococcaceae	Bavariicoccus	0	0	0	0	0.0188017	0	0	0		0	0	0	0	0.0402172	0	0		0	0	0.0390396	0	0		0	0	0	0.0363451	0	0	0		0	0	0.222813	0.145215	0		0	0	0	0	0		0	0	0	0
	Enterococcaceae	Enterococcus	0	0	0	0	0	0	0	0		0	0	0	0	0	0	0		0	0	0	0	0		0.480092	0	0	0	0	0	0		0	0	0	0	0		0	0	0	0	0		0	0	0	0
	Veillonellaceae	Anaerovibrio	0.0876088	0	0	0.0456329	0	0	0	0		0	0.0155119	0	0	0	0	0		0	0	0	0	0		0	0.0200833	0	0	0	0	0		0	0	0	0	0		0	0	0	0	0		0	0	0	0
	Eubacteriaceae	Anaerofustis	0	0	0.0382514	0	0	0	0	0.0392989		0.0172891	0.0465357	0	0	0	0	0.0289038		0	0	0	0.013708	0		0	0	0	0	0	0.0216544	0		0	0	0	0	0		0	0	0	0	0		0	0	0	0
	Acidaminococcaceae	Unclassified Acidaminococcaceae	0	0	0	0	0	0	0	0		0	0	0	0	0	0	0		0	0	0	0	0		0	0	0	0	0	0	0		0	0	0	0	0		0	0	0	0	0		0	0	0	0
	Leuconostocaceae	Weissella	0	0	0	0	0	0	0	0		0	0	0	0	0	0	0		0	0	0	0	0		0	0	0	0	0	0	0		0	0	0	0	0		0	0	0	0	0		0	0	0	0
Fusobacteria	Fusobacteriaceae	Fusobacterium	0.383289	0	0	0	0	0	0	0.180775		0.064834	0.103413	0	0	0.0502715	0	0.0794855		0.170255	0	0.0130132	0.0182774	0.165631		8.5932	0	0.0880946	0	0	0.0216544	1.44025		0	0	0	0	0		0	0	0	0	0		0	0	0	0
Lentisphaerae	Unclassified Lentisphaerae	Unclassified Lentisphaerae	0.0109511	0	0	0	0.0376034	0	0	0		0.0172891	0	0	0.118407	0	0	0.0361298		0	0	0	0	0		0	0	0	0	0	0	0		0	0	0	0	0		0	0	0.0205624	0	0		0.0206265	0	0	0
Proteobacteria	Succinivibrionaceae	Ruminobacter	3.04988	0	1.84153	2.12649	0	0	0	7.73402		4.04132	1.73216	2.41902	0	0	0	1.17783		0.763401	1.02774	0	4.48709	0.803313		0.220226	1.58156	1.40951	0	0	4.78562	1.16777		1.96711	1.96078	0	0	2.35905		0	0.821203	0	0	0.0176149		0	0	0	0
	Unclassified Gammaproteobacteria	Unclassified Gammaproteobacteria	1.67004	2.50888	9.71038	0.620608	2.03685	0.852631	0	6.70439		5.1046	1.62875	1.39401	1.14101	1.97064	0	3.07826		1.49934	2.03552	0.891405	3.92963	2.99793		0.396406	0.557313	4.45507	3.03845	0	6.72008	2.37446		3.24188	1.92436	2.7672	0	0		18.6643	2.1605	0.223616	0	0.440373		20.1845	0.174554	0.224191	0.123457
	Unclassified Proteobacteria	Unclassified Proteobacteria	1.74123	0.686391	4	1.15908	1.1469	1.00765	0	2.7352		1.50847	1.43226	1.18901	0.430571	0.552986	0	1.43797		1.14236	1.61644	0.286291	2.06077	2.00414		0.286293	0.487021	1.53536	0.188995	0	3.68125	1.30012		0.179494	0.0424938	0.150938	0	0.250297		0.0842359	0.398266	0.665707	0	0.0176149		0.0471462	0.353957	0.395004	0.0771605
	Unclassified Betaproteobacteria	Unclassified Betaproteobacteria	0.405191	0.426036	0.502732	0.702747	0.429306	0.833253	0	0.825277		0.661307	0.434333	0.574006	0.247578	0.683692	0	0.664788		0.884227	1.27719	1.15818	1.18346	1.30849		0.246653	1.12969	1.08231	0.312568	0	1.35701	1.17555		0.586102	0.522066	0.14375	0	0.525624		0	0.602686	0.42924	0	0.0951207		0.0913457	0.0775795	0.0320273	0
	Succinivibrionaceae	Succinimonas	0.432569	2.24852	0.409836	0.191658	1.0623	2.01531	0.408104	0.966753		0.899032	0.594623	0.861009	0.215285	1.34728	0	0.101163		0.153779	0.50888	0.696207	0.233036	0.430642		0	0	0.956456	0.755979	0	0.19489	0		0.578776	0.400656	0.999066	0	0		0	0.193846	0.0925307	0	0		0	0	0	0
	Neisseriaceae	Unclassified Neisseriaceae	0	0.757396	0.202186	0.273798	0.222487	0.310047	0	0.70738		0.13399	0.103413	0	0	0.402172	0	0.202327		0.395431	0.399122	0.546555	0.319854	0.372671		0.0836857	0.306271	0.566323	0	0	0.563014	0.326975		0.194146	0.163905	0	0	0		0.0385078	0.218518	0.192772	0	0		0	0	0	0
	Unclassified Deltaproteobacteria	Unclassified Deltaproteobacteria	0.410666	1.15976	0.322404	0.209911	0.272625	0.794497	0	0.251513		0.151279	0.263702	0.338253	0.365985	0.301629	0	0		0.324033	0.149671	0.38389	0.178204	0		0	0.306271	0	0.261685	0	0	0		0.12821	0.0607054	0.165313	0	0		0	0.222042	0.105382	0.166291	0		0	0	0	0
	Succinivibrionaceae	Succinivibrio	0.0985599	0	0	0.228165	0	0	0	0.0864576		0.112379	0.041365	0	0	0	0	0.0722596		0.170255	0	0	0.0822481	0.15735		0	0.115479	0.264284	0	0	0.101054	0		0.150189	0.279245	0	0	0.231525		0.0818291	0.137455	0	0	0		0.103132	0	0	0
	Acetobacteraceae	Unclassified Acetobacteraceae	0.0930844	0	0	0.40157	0.322763	0.106579	0	0.070738		0.0778008	0.0879007	0.143501	0.172228	0.191032	0	0.0505817		0.0384446	0.0898024	0.175678	0	0.0993789		0.0704722	0	0.276869	0.159919	0	0	1.73608		0.0439577	0	0.0790627	0	0		0.0264741	0	0.0334139	0	0		0.032413	0.0484872	0.128109	0
	Desulfobulbaceae	Unclassified Desulfobulbaceae	0	0.331361	0	0.0547595	0.0846077	0	0	0.0864576		0.0432227	0.0465357	0	0.0322928	0.0703801	0	0		0.0384446	0.0399122	0.110612	0.0411241	0.149068		0	0	0.0377548	0.0872283	0	0	0.062281		0.0146526	0	0.0790627	0	0		0.0288809	0.0458182	0.0231327	0.0911919	0.0211379		0.0441995	0.0581846	0.149461	0
	Succinivibrionaceae	Unclassified Succinivibrionaceae	0	0	0	0	0	0	0	0.691661		0	0	0	0	0	0	0		0	0	0	0.269591	0		0	0	0	0	0	0.447524	0		0	0	0	0	0		0	0	0	0	0		0	0	0	0
	Unclassified Alphaproteobacteria	Unclassified Alphaproteobacteria	0	0	0.147541	0	0	0	0	0		0	0	0	0	0	0	0		0	0	0	0.0685401	0		0	0	0	0	0	0.101054	0		0.0439577	0	0	0	0		0	0	0.0591168	0	0		0	0	0	0
	Unclassified Burkholderiales	Unclassified Burkholderiales	0.0383289	0	0.136612	0.136899	0	0	0	0.149336		0.0605118	0.0517063	0.123001	0	0	0	0.0794855		0.142794	0	0	0.0685401	0.248447		0	0.0953959	0	0	0	0.0721813	0.186843		0.0402945	0.0364232	0	0	0		0.0288809	0.116308	0.131085	0	0.0211379		0.0589327	0.0533359	0	0
	Enterobacteriaceae	Unclassified Enterobacteriaceae	0	0	0	0	0	0	0	0		0	0	0	0	0	0	0		0.0274605	0	0	0	0		2.19345	0	0	0	0	0	0		0	0	0	0	0		0	0	0	0	0		0	0	0	0
	Pseudomonadaceae	Pseudomonas	0	0	0	0	0	0	0	0		0	0	0	0	0	0	0		0	0	0	0	0		0.233439	0	1.6738	0	0	0	0		0	0	0	0	0		0	0	0	0	0		0	0	0	0
	Campylobacteraceae	Campylobacter	0.0657066	0	0	0	0	0	0	0.070738		0.0345781	0	0	0	0	0	0		0	0	0	0.0594014	0		0	0	0	0	0	0	0		0	0	0	0	0		0	0	0	0	0		0	0	0	0
	Comamonadaceae	Lampropedia	0	0	0	0	0	0	0	0		0	0	0	0	0	0	0		0	0	0	0	0		0	0	0	0	0	0	0		0	0	0	0	0		0	0	0	0	0		0	0	0	0
Spirochaetes	Spirochaetaceae	Treponema	0.969173	0	0.295082	0	0	0	0	0.864576		1.16269	0.434333	0	0	0	0	1.78481		0.785369	0	0	0.721956	1.81366		0	0.903751	0	0	0	0.866176	1.1522		0.43225	0	0	0	1.10757		0.055355	0.281958	0	0	1.18372		0.371276	0	0	0
	Unclassified Spirochaetales	Unclassified Spirochaetales	0.158791	0	0.628415	0	0	0	0	0.424428		0.376037	2.56463	0	0	0	0	0.556399		0.208699	0	0	0.146219	0.26501		0	0.165688	0	0	0	0	0.194628		0.142862	0	0	0	0.0250297		0.00722022	0.126881	0	0	0		0.0441995	0	0	0
	Spirochaetaceae	Unclassified Spirochaetaceae	0	0	0	0	0	0	0	0		0.0345781	0.0517063	0	0	0	0	0		0.0329525	0	0	0.0228467	0		0	0	0	0	0	0.0216544	0		0	0	0	0	0		0.00481348	0.0458182	0	0	0.147965		0.103132	0	0	0
	Unclassified Spirochaetia	Unclassified Spirochaetia	0	0	0	0	0	0	0	0		0	0	0	0	0	0	0		0	0	0	0	0		0	0	0	0	0	0.0505269	0		0	0	0	0	0		0	0	0	0	0		0	0	0	0
SR1	SR1_genera_incertae_sedis	Unclassified SR1_genera_incertae_sedis	0.355911	0.686391	0.846995	1.06781	0.576586	0	0.757907	0.998192		0.445194	0.65667	1.15826	0.925727	0.874724	0.943479	0.585302		0.483304	2.08541	0.605114	0.182774	0.73706		0.0792812	0.507104	1.4221	0.625136	1.00077	0.101054	0.435967		0.157515	0.248892	0.596564	0.435644	0.513109		0	0.0211469	0.552614	0	0.0669368		0.0677726	0.392746	0.0640547	0
	SR1_genera_incertae_sedis	SR1_genera_incertae_sedis	0.120462	0	0	0	0	0	0	0.110037		0.242047	0	0	0	0	0	0		0	0	0	0.013708	0		0	0	0	0	0	0	0		0	0	0	0	0		0	0	0	0	0		0	0	0	0
Synergistetes	Synergistaceae	Unclassified Synergistaceae	0	0	0.26776	0.282924	0	0	0	0.306531		0.194502	0.196484	0	0	0	0	0.224005		0	0.369188	0	0.159927	0.231884		0	0.266104	0.515983	0	0	0.23098	0		0	0.182116	0	0	0.162693		0	0	0.0873901	0	0		0	0	0	0
Tenericutes	Anaeroplasmataceae	Asteroleplasma	0.2464	0	0	0	0.0313362	0	0	0		0.237725	0.0258532	0.0820008	0.0322928	0	0	0.0578076		0	0	0	0.301576	0		0.101304	0	0	0	0	1.17656	0		0	0.698112	0	0	0		4.24067	0	2.02796	0	1.89537		0.34181	0	0.0427031	0
	Anaeroplasmataceae	Anaeroplasma	1.36889	0.52071	0.579235	0.930912	0.679995	0.697607	0	0.636642		1.0287	0.511892	0.99426	1.11948	0.914941	0	1.20673		0.373462	0.309319	0	0.237606	0.546584		0	0.155646	0.327209	0	0	0.108272	0.435967		0.556797	0.182116	0	0	0.475565		0	0.126881	0.267311	0	0		0.100186	0.00969744	0.0320273	0
	Anaeroplasmataceae	Unclassified Anaeroplasmataceae	0.104035	0	0	0	0	0	0	0.220074		0.267981	0	0	0	0	0	0.0578076		0	0	0	0.187343	0		0	0	0	0	0	0.19489	0		0	0	0	0	0		0	0	0	0	0		0	0	0	0
	Unclassified Anaeroplasmatales	Unclassified Anaeroplasmatales	0	0	0	0.182532	0.0250689	0.0581339	0	0		0	0.103413	0.123001	0	0	0	0		0.0384446	0.0399122	0	0	0		0	0	0.453058	0	0	0	0		0.0183157	0.0849876	0	0	0.043802		0	0.0493427	0	0	0		0	0	0	0
	Unclassified Mollicutes	Unclassified Mollicutes	0	0	0	0	0	0	0	0		0	0	0	0	0	0	0		0	0	0	0	0		0	0	0	0	0	0	0		0	0	0	0	0		0	0	0	0	0		0	0	0	0
Unclassified Bacteria	Unclassified Bacteria	Unclassified Bacteria	2.58994	0.852071	2.43169	2.58282	1.75483	2.13158	1.98222	5.07742		4.52974	2.04757	2.27552	3.39074	1.47798	2.08095	4.01041		3.21287	9.27958	1.00202	1.39822	4.37267		1.96001	3.16815	6.84621	1.48288	0.66718	1.19099	15.0019		2.08066	2.51927	0.905628	0.712871	2.15256		1.61011	3.11916	2.13335	0.933376	6.40479		4.3404	2.11889	4.96424	0.169753
Verrucomicrobia	Subdivision5_genera_incertae_sedis	Unclassified Subdivision5_genera_incertae_sedis	0	0	0	0	0	0	0	0.0471587		0	0.0361944	0	0	0	0	0		0	0	0	0.0502627	0.057971		0	0	0	0	0	0	0		0	0	0	0	0		0	0	0	0	0		0.0206265	0	0	0
[truncated: 41 more columns]
