# Supplementary material for: Cow’s microbiome from antepartum to postpartum: A long-term study covering two physiological challenges
Source: Front Microbiol. 2022 Nov 16;13:1000750. doi: 10.3389/fmicb.2022.1000750 (PMC9709127; doi:10.3389/fmicb.2022.1000750)
Supplement: Supplementary file 3 [file Table_3.XLSX]

## Sheet: Rumen Fluid
Supplementary Data 3
Rumen fluid samples
In this table, time points are compared and the top three OTUs listed that contribute the most to the difference between time point communities.
Time point 1	Time point 2	Global-R	p-value	Higher in time point 1	OTU-Time point 1	Higher in time point 2	OTU-Time point 2
-42	+118	0.954	0.0003	g_Ruminobacter, s_F. succinogenes subsp. null, s_F. succinogenes	OTU104, OTU285, OTU515	s_O. umbonata, g_uncl. Prevotellaceae, g_uncl. Prevotellaceae	OTU11, OTU20, OTU14
-42	72hC	0.627	0.0003	g_Ruminobacter, s_F. succinogenes subsp. null, g_Succiniclasticum	OTU104, OTU285, OTU38	s_B. merycicum, s_B. merycicum, s_B. merycicum	OTU25, OTU31, OTU60
-42	+126	0.953	0.0003	g_Ruminobacter, s_F. succinogenes subsp. null, s_F. succinogenes	OTU104, OTU285, OTU515	s_O. umbonata, g_uncl. Prevotellaceae, g_uncl. Prevotellaceae	OTU11, OTU14, OTU82
-42	+100	0.933	0.0008	g_Ruminobacter, s_F. succinogenes subsp. null, s_P. ruminicola	OTU104, OTU285, OTU630	g_uncl. Prevotellaceae, g_uncl. Prevotellaceae, s_P. ruminicola	OTU14, OTU20, OTU54
-42	+14	0.832	0.0008	g_Ruminobacter, s_F. succinogenes subsp. null, s_P. ruminicola	OTU104, OTU285, OTU630	g_Prevotella, g_uncl. Prevotellaceae, g_Pseudoscardovia	OTU55, OTU20, OTU267
-42	24hC	0.225	0.038	g_Ruminobacter, s_F. succinogenes subsp. null, s_F. succinogenes	OTU104, OTU285, OTU515	g_uncl. Gammaproteobacteria, g_uncl. Succinivibrionaceae, g_uncl. Gammaproteobacteria	OTU241, OTU663, OTU310
-14	+100	0.952	0.002	g_uncl. Bacteroidales, g_uncl. Prevotellaceae, g_uncl. Bacteroidetes	OTU805, OTU59, OTU699	g_uncl. Prevotellaceae, g_uncl. Prevotellaceae, s_P. ruminicola	OTU14, OTU20, OTU54
-14	+118	0.959	0.002	g_uncl. Bacteroidales, g_uncl. Bacteroidetes, g_uncl. Bacteroidales	OTU805, OTU699, OTU758	s_O. umbonata, g_uncl. Prevotellaceae, g_uncl. Prevotellaceae	OTU11, OTU20, OTU14
-14	+126	0.954	0.002	g_uncl. Bacteroidales, g_uncl. Bacteroidetes, g_uncl. Bacteroidales	OTU805, OTU699, OTU758	s_O. umbonata, g_uncl. Prevotellaceae, g_uncl. Prevotellaceae	OTU11, OTU14, OTU82
-14	+14	0.72	0.002	g_uncl. Bacteroidales, g_uncl. Bacteroidetes, g_uncl. Bacteroidales	OTU805, OTU699, OTU758	g_Prevotella, g_uncl. Prevotellaceae, g_Pseudoscardovia	OTU55, OTU20, OTU267
-14	72hC	0.478	0.006	g_uncl. Bacteroidales, g_uncl. Gammaproteobacteria, g_uncl. Bacteroidetes	OTU805, OTU241, OTU699	s_B. merycicum, s_B. merycicum, s_B. merycicum	OTU25, OTU31, OTU60
+14	72hC	0.648	0.002	g_Prevotella, g_uncl. Prevotellaceae, g_Pseudoscardovia	OTU55, OTU20, OTU267	s_B. merycicum, s_B. merycicum, s_B. merycicum	OTU25, OTU31, OTU60
+14	24hC	0.681	0.003	g_Prevotella, g_uncl. Prevotellaceae, g_Pseudoscardovia	OTU55, OTU20, OTU267	g_uncl. Gammaproteobacteria, g_uncl. Succinivibrionaceae, g_uncl. Ruminococcaceae	OTU241, OTU663, OTU66
+100	24hC	0.954	0.001	g_uncl. Prevotellaceae, g_uncl. Prevotellaceae, s_P. ruminicola	OTU14, OTU20, OTU54	g_uncl. Gammaproteobacteria, g_uncl. Succinivibrionaceae, g_uncl. Ruminococcaceae	OTU241, OTU663, OTU66
+100	72hC	0.933	0.002	g_uncl. Prevotellaceae, g_uncl. Prevotellaceae, s_P. ruminicola	OTU14, OTU20, OTU54	s_B. merycicum, s_B. merycicum, s_B. merycicum	OTU25, OTU31, OTU60
+100	+14	0.28	0.032	g_uncl. Prevotellaceae, s_P. ruminicola, s_O. uli	OTU14, OTU54, OTU8	g_Prevotella, g_uncl. Prevotellaceae, g_Pseudoscardovia	OTU55, OTU20, OTU267
+100	12hC	0.673	0.048	g_uncl. Prevotellaceae, g_uncl. Prevotellaceae, s_P. ruminicola	OTU14, OTU20, OTU54	s_O. umbonata, s_S. azabuensis, g_Prevotella	OTU11, OTU65, OTU55
12hL	-42	0.918	0.0003	g_uncl. Prevotellaceae, g_uncl. Prevotellaceae, s_O. umbonata	OTU14, OTU20, OTU11	s_F. succinogenes subsp. null, g_Ruminobacter, s_F. succinogenes	OTU285, OTU104, OTU515
12hL	24hC	0.921	0.0006	g_uncl. Prevotellaceae, g_uncl. Prevotellaceae, s_O. umbonata	OTU14, OTU20, OTU11	g_uncl. Gammaproteobacteria, g_uncl. Succinivibrionaceae, g_uncl. Ruminococcaceae	OTU241, OTU663, OTU66
12hL	-14	0.937	0.002	g_uncl. Prevotellaceae, g_uncl. Prevotellaceae, s_O. umbonata	OTU14, OTU20, OTU11	g_uncl. Bacteroidales, g_uncl. Bacteroidetes, g_uncl. Bacteroidales	OTU805, OTU699, OTU758
12hL	72hC	0.911	0.002	g_uncl. Prevotellaceae, g_uncl. Prevotellaceae, s_O. umbonata	OTU14, OTU20, OTU11	s_B. merycicum, s_B. merycicum, s_B. merycicum	OTU25, OTU31, OTU60
12hL	+14	0.56	0.002	g_uncl. Prevotellaceae, s_O. umbonata, g_uncl. Prevotellaceae	OTU14, OTU11, OTU67	g_Prevotella, g_uncl. Prevotellaceae, g_Pseudoscardovia	OTU55, OTU20, OTU267
24hL	-42	0.833	0.0008	g_uncl. Prevotellaceae, g_Ruminobacter, s_R. bromii	OTU14, OTU104, OTU119	s_F. succinogenes subsp. null, s_F. succinogenes, s_P. ruminicola	OTU285, OTU515, OTU630
24hL	24hC	0.856	0.001	g_uncl. Prevotellaceae, s_R. bromii, g_Ruminobacter	OTU14, OTU119, OTU104	g_uncl. Gammaproteobacteria, g_uncl. Succinivibrionaceae, g_uncl. Ruminococcaceae	OTU241, OTU663, OTU66
24hL	-14	0.867	0.002	g_uncl. Prevotellaceae, s_R. bromii, g_Ruminobacter	OTU14, OTU119, OTU104	g_uncl. Bacteroidales, g_uncl. Bacteroidetes, g_uncl. Bacteroidales	OTU805, OTU699, OTU758
24hL	72hC	0.813	0.002	g_uncl. Prevotellaceae, s_R. bromii, g_Ruminobacter	OTU14, OTU119, OTU104	s_B. merycicum, s_B. merycicum, s_B. merycicum	OTU25, OTU31, OTU60
24hL	+14	0.496	0.008	g_uncl. Prevotellaceae, s_R. bromii, g_Ruminobacter	OTU14, OTU119, OTU104	g_Prevotella, g_uncl. Prevotellaceae, g_Pseudoscardovia	OTU55, OTU20, OTU267
72hL	-42	0.913	0.0003	s_O. umbonata, s_R. bromii, g_uncl. Gammaproteobacteria	OTU11, OTU119, OTU47	g_Ruminobacter, s_F. succinogenes subsp. null, s_F. succinogenes	OTU104, OTU285, OTU515
72hL	24hC	0.889	0.0006	s_O. umbonata, s_R. bromii, g_uncl. Gammaproteobacteria	OTU11, OTU119, OTU47	g_uncl. Gammaproteobacteria, g_uncl. Succinivibrionaceae, g_uncl. Ruminococcaceae	OTU241, OTU663, OTU66
72hL	-14	0.902	0.002	s_O. umbonata, s_R. bromii, g_uncl. Gammaproteobacteria	OTU11, OTU119, OTU47	g_uncl. Bacteroidales, g_uncl. Bacteroidetes, g_uncl. Bacteroidales	OTU805, OTU699, OTU758
72hL	72hC	0.876	0.002	s_O. umbonata, s_R. bromii, g_uncl. Gammaproteobacteria	OTU11, OTU119, OTU47	s_B. merycicum, s_B. merycicum, s_B. merycicum	OTU25, OTU31, OTU60
72hL	+14	0.613	0.002	s_O. umbonata, s_R. bromii, g_uncl. Prevotellaceae	OTU11, OTU119, OTU14	g_Prevotella, g_uncl. Prevotellaceae, g_Pseudoscardovia	OTU55, OTU20, OTU267
+118	24hC	0.943	0.0006	s_O. umbonata, g_uncl. Prevotellaceae, g_uncl. Prevotellaceae	OTU11, OTU20, OTU14	g_uncl. Gammaproteobacteria, g_uncl. Succinivibrionaceae, g_uncl. Gammaproteobacteria	OTU241, OTU663, OTU310
+118	72hC	0.939	0.002	s_O. umbonata, g_uncl. Prevotellaceae, g_uncl. Prevotellaceae	OTU11, OTU20, OTU14	s_B. merycicum, s_B. merycicum, s_B. merycicum	OTU25, OTU31, OTU60
+118	+14	0.515	0.004	s_O. umbonata, g_uncl. Prevotellaceae, g_uncl. Prevotellaceae	OTU11, OTU20, OTU14	g_Prevotella, g_Pseudoscardovia, s_O. umbonata	OTU55, OTU267, OTU6
+126	24hC	0.919	0.0006	s_O. umbonata, g_uncl. Prevotellaceae, g_uncl. Prevotellaceae	OTU11, OTU14, OTU82	g_uncl. Gammaproteobacteria, g_uncl. Succinivibrionaceae, g_uncl. Ruminococcaceae	OTU241, OTU663, OTU66
+126	72hC	0.933	0.002	s_O. umbonata, g_uncl. Prevotellaceae, g_uncl. Prevotellaceae	OTU11, OTU14, OTU82	s_B. merycicum, s_B. merycicum, s_B. merycicum	OTU25, OTU31, OTU60
+126	+14	0.52	0.004	s_O. umbonata, g_uncl. Prevotellaceae, g_uncl. Prevotellaceae	OTU11, OTU14, OTU82	g_Prevotella, g_uncl. Prevotellaceae, g_Pseudoscardovia	OTU55, OTU20, OTU267

## Sheet: RDP_Rumen
Supplementary Data 3
Rumen fluid samples
Time points are compared and the top three OTUs listed that contribute the most to the difference between time point communities. The most contributing OTUs were blasted in RDP and listed below.
Rumen	RDP blast on 29.06.2020
							RDP Output
OTU	Sequence	Phylum	Class	Order	Family	Genus	RDP_ID	S_ab score	unique common oligomers	sequence full name	final species
OTU104	ATTGAACGCTGGCGGCAGGCTTAATACATGCAAGTCGAACGGTAACGGCAGGAAGCTTGCTTCCTGGCTGACGAGTGGCGGACGGGTGAGTAATACCTGGGGAGCTGCCTGAATGAGGGGGACAACACCTGGAAACGGGTGCTAATACCGCGTAAGCCCTGAGGGGGAAAGGCCGGGCAACCGGTCGCATTCAGATGCGCCCAGGTGGGATTAGCTAGTTGGTGGGGTAACGGCCTACCAAGGCGACGATCTCTAGCTGGTCTGAGAGGATGATCAGCCACACTGGAACTGAGACACGGTCCAG	Proteobacteria	Gammaproteobacteria	Aeromonadales	Succinivibrionaceae	Ruminobacter	S001058554	1	1308	uncultured bacterium; CAP_aah97e03; EU459455	uncultured bacterium
OTU11	GATGAACGCTGGCGGCGCGCCTAACACATGCAAGTCGAACGGTTAAAGCACCTTCGGGTGTGTATAAAGTGGCGAACGGCTGAGTAACACGTGGGCAACCTGCCCCTCGCACCGGGACAGCCTCGGGAAACCGTGGTTAATACCGGATACGCCCAGAGGAGGACATCCTCCACTGGGGAAAGCCCCGACGGCGAGGGATGGGCCCGCGGCCTGTTAGCTTGTTGGTGGGGTAACGGCCCACCAAGGCGATTATGGGTAGCTGGGTTGAGAGACCGACCAGCCAGATTGGGACTGAGACACGGCCCAG	Actinobacteria	Actinobacteria	Coriobacteriales	Coriobacteriaceae	Olsenella	S001872603	0.805	1343	O. umbonata; A2; AJ251324	O. umbonata
OTU119	GACGAACGCTGGCGGCGTGCCTAACACATGCAAGTCGAACGGAACTGCTTCGAAGGATTTCTTCGGAATGACATTGATTCAGTTTAGTGGCGGACGGGTGAGTAACGCGTGAGTAACCTGCCTTCAAGAGGGGGATAACATTCTGAAAAGAATGCTAATACCGCATGACATATGATTGTCGCATGGCAGACATATCAAAGATTTATCGCTTGAAGATGGACTCGCGTCCGATTAGTTAGTTGGTGAGGTAACGGCCCACCAAGACCGCGATCGGTAGCCGGACTGAGAGGTTGAACGGCCACATTGGGACTGAGACACGGCCCAG	Firmicutes	Clostridia	Clostridiales	Ruminococcaceae	Unclassified Ruminococcaceae	S000728607	1	1400	R. bromii; YE282; DQ882649	R. bromii
OTU14	GATGAACGCTAGCTACAGGCTTAACACATGCAAGTCGAGGGGAAACGATTAGAGGTGCTTGCACCACTAAGGCGTCGACCGGCGCACGGGTGAGTAACGCGTATCCAACCTGCCCCATGGTAAGGAATAATCCGTAGAAATGCGGTCTAATACCTTATGTGCTCCGAAGAGGACATCTGATTTGGAGTAAAGATTTATCGCCATGGGATGGGGATGCGTCTGATTAGATTGTTGGCGGGGCAACGGCCCACCAAGTCACCGATCAGTAGGGGTTCTGAGAGGAAAGTCCCCCACATTGGAACTGAGACACGGTC	Bacteroidetes	Bacteroidia	Bacteroidales	Prevotellaceae	Unclassified Prevotellaceae	S000336519	1	1016	unidentified rumen bacterium 12-44; AF018466	unidentified rumen bacterium
OTU20	GATGAACGCTAGCTACAGGCTTAACACATGCAAGTCGAGGGGTAACGACAGCGAAAGCTTGCTTTTGCTGGGCGACGACCGGCGAATGGGTGAGTAACGCGTATCCAACCTGCCGCAAAGTAGGGCACAGCCTTGCGAAAGTAAGATTAATGCCCTATGTGCTGTGATGAGGACATCTGAATTGCAGTAAAGGTTCACCGCTTTGCGATGGGGATGCGTCTGATTAGGTTGTTGGCGGGGTAACGGCCCACCAAGCCCGCGATCAGTAGGGGTTCTGAGAGGAAGGTCCCCCACATTGGAACTGAGACACGGTC	Bacteroidetes	Bacteroidia	Bacteroidales	Prevotellaceae	Unclassified Prevotellaceae	S000336539	1	1368	unidentified rumen bacterium 12-109; AF018486	unidentified rumen bacterium
OTU241	ATTGAACGCTGGCGGCAGGCCTAATACATGCAAGTCGAACGGTAACATGGAAGTAGCAATACTTTTGATGACGAGTGGCGGACGGGTGAGTAATATTTGGGAATCTACCTATCAGAGGGGGATAGCAACTGGAAACGGTTGATAAGACCGCGTACGCTCTGAGGAGGAAAGTAATGGGATCGAAAGACCATTAGCTGATAGATGAGCCCAAACGGGATTAGCTAGTAGGCGGGGTAAGGGCCCACCTAGGCGACGATCTCTAGCTGGTTTTAGCGGATGATCAGCCACATTGGAACTGAGACACGGTC	Proteobacteria	Gammaproteobacteria	Unclassified Gammaproteobacteria	Unclassified Gammaproteobacteria	Unclassified Gammaproteobacteria	S002027709	1	1412	uncultured rumen bacterium; L406RC-2-A09; GU303607	uncultured rumen bacterium
OTU25	GATGAACGCTGGCGGCGTGCTTAACACATGCAAGTCGAACGGGATCGGCTGGAGCTTGCTCCGGCCGTGAGAGTGGCGAACGGGTGAGTAATGCGTGACCGACCTGCCCCGTACACCGGAATAGCTCCTGGAAACGGGTGGTAATGCCGGATGCTCCAATGCGATGCATGTCGCGTTGGGAAAGATTTCATCGGTATGGGATGGGGTCGCGTCCTATCAGGTAGTCGGCGGGGTAACGGCCCACCGAGCCTACGACGGGTAGCCGGCCTGAGAGGGCGACCGGCCACATTGGGACTGAGATACGGCCCAG	Actinobacteria	Actinobacteria	Bifidobacteriales	Bifidobacteriaceae	Bifidobacterium	S001875321	1	1385	B. merycicum;KCTC 3369;GU361825	B. merycicum
OTU267	GACGAACGCTGGCGGCGTGCTTAACACATGCAAGTCGAACGGGATCCTGCAAGCTTGCTTGCGGGTGAGAGTGGCGAACGGGTGAGTAATGCGTGACCAACCTGCCCCATTCTCCGGAATAGCTCCTGGAAACGGGTGGTAATGCCGGATGCTCCGCCCCCTCGCATGGGGGGTCGGGAAGGCTTTTGCGGAATGGGATGGGGTCGCGTCCTATCAGCTTGTTGGCGGGGCGACGGCCCACCAAGGCTTCGACGGGTAGCCGGCCTGAGAGGGCGACCGGCCACATTGGGACTGAGATACGGCCCAG	Actinobacteria	Actinobacteria	Bifidobacteriales	Bifidobacteriaceae	Pseudoscardovia	S003665672	1	1388	uncultured bacterium; CONT-08; AB507454	uncultured bacterium
OTU285	AACGAACGCTGGTGGCGTGTCTTATACATGCAAGTCGAGCGAGGCAGCAATGCCGAGCGGCGAACGGGTGAGTAACGCGTAAGCAATCTGCCCCATATCAGGAAATACCCGTGCCAACGCGCGGTTAATGTCCAGGAGAGTGGCCCTCTGCATGGAGGGTTGACTAGAGATTTATCGGTATGGGATGAGCTTGCGTCCGATTAGCTAGTTGGCGGGGCAACGGCCCACCAAGGCGACGATCGGTAGCCGGCCTGAGAGGGTGATCGGCCACATTGGGACTGAGATACGGCCCAG	Fibrobacteres	Fibrobacteria	Fibrobacterales	Fibrobacteraceae	Fibrobacter	S000351773	0.989	1340	F. succinogenes subsp. null; R; AJ505938	F. succinogenes subsp. null
OTU31	GATGAACGCTGGCGGCGTGCTTAACACATGCAAGTCGAACGGGATCCAGGCAGCTTGCTGCCTGGTGAGAGTGGCGAACGGGTGAGTAATGCGTGACCGACCTGCCCCGTACACCGGAATAGCTCCTGGAAACGGGTGGTAATGCCGGATGCTCCAATGCGATGCATGTCGCGTTGGGAAAGATTTCATCGGTATGGGATGGGGTCGCGTCCTATCAGGTAGTCGGCGGGGTAACGGCCCACCGAGCCTACGACGGGTAGCCGGCCTGAGAGGGCGACCGGCCACATTGGGACTGAGATACGGCCCAG	Actinobacteria	Actinobacteria	Bifidobacteriales	Bifidobacteriaceae	Bifidobacterium	S001875321	0.932	1385	B. merycicum; KCTC 3369; GU361825	B. merycicum
OTU310	ATTGAACGCTGGCGGCAGGCCTAATACATGCAAGTCGAACGGTAACATGGAAGTAGCAATACTTTTGATGACGAGTGGCGGACGGGTGAGTAATATTTGGGAATCTACCTATCAGAGGGGGATAGCAACTGGAAACGGTTGATAAGACCGCGTACGCTCTGAGGAGGAAAGTAATGGGATCGCAAGACCATTAGCTGATAGATGAGCCCAAACGGGATTAGCTAGTAGGCGGGGTAAGGGCCCACCTAGGCGACGATCTCTAGCTGGTTTTAGCGGATGATCAGCCACATTGGAACTGAGACACGGTC	Proteobacteria	Gammaproteobacteria	Unclassified Gammaproteobacteria	Unclassified Gammaproteobacteria	Unclassified Gammaproteobacteria	S002027543	1	1414	uncultured rumen bacterium; L206RT-6-A06; GU303441	uncultured rumen bacterium
OTU38	GACGAACGCTGGCGGCGTGCCTAACACATGCAAGTCGAACGGGGATTTTGTTTCGGCAGAATCCTAGTGGCGAACGGGTGAGTAACGCGTAGGCAACCTGCCCTCCGGCCGGGGACAACACTCCGAAAGGGGTGCTAATACCGGATACGAAGTCTGTGCCGCATGGTACGGATTTGAAAGATGGCCTCTATTTATAAGCTATCGCCGGGGGATGGGCCTGCGTCCGATTAGCTGGTTGGTGGGGTAACGGCCTACCAAGGCGACGATCGGTAGCCGGTCTGAGAGGATGAACGGCCACATTGGGACTGAGACACGGCCCAG	Firmicutes	Negativicutes	Selenomonadales	Acidaminococcaceae	Succiniclasticum	S000404468	1	1425	uncultured rumen bacterium; BS20; AY244974	uncultured rumen bacterium
OTU47	ATTGAACGCTGGCGGCAGGCTTAACACATGCAAGTCGTACGGTAACAGAGGGAAGCTTGCTTCTCTGCTGACGAGTGGCGGACGGGTGAGTAATGTCTGGGAAGCTGCCTGCTTGAGGGGGATAGCGGAGCGAAAGTTCCGATAATACCGCGTAAGCCCGAGAGGGGAAAGTGCGGGACCGCAAGGCCGCACGCGAGCAGATGCGCCCAGATGGGATTAGGCAGTTGGGGAGGTAATGGCTCACCAAACCGATGATCTCTAGCTGGTTTGAGAGGACAATCAGCCACATTGGAATTGAGAAACGGAC	Proteobacteria	Gammaproteobacteria	Unclassified Gammaproteobacteria	Unclassified Gammaproteobacteria	Unclassified Gammaproteobacteria	S002437719	0.983	1417	uncultured rumen bacterium; L102RC-1-H04; HQ399724	uncultured rumen bacterium
OTU515	AACGAACGCTGGTGGCGTGTCTTATACATGCAAGTCGAGCGAGGCAGCAATGCCGAGCGGCGAACGGGTGAGTAACGCGTAAGCAATCTGCCCCATATCAGGAAATACCCGTGCCAACGCGCGGTTAATGTCCAGGAGAGTGGCCCCCTGCATGGGGGGTTGACTAGAGATTTATCGGTATGGGATGAGCTTGCGTCCGATTAGCTAGTTGGCGGGGCAACGGCCCACCAAGGCGACGATCGGTAGCCGGCCTGAGAGGGTGATCGGCCACATTGGGACTGAGATACGGCCCAG	Fibrobacteres	Fibrobacteria	Fibrobacterales	Fibrobacteraceae	Fibrobacter	S002290115	0.958	1406	F. succinogenes subsp. Succinogenes; S85 CP001792	F. succinogenes
OTU54	GATGAACGCTAGCTACAGGCTTAACACATGCAAGTCGAGGGGTAACGACAGCGAAAGCTTGCTTTTGCTGGGCGACGACCGGCGCACGGGTGAGTAACGCGTATCCAACCTGCCCATAACTAAGGGATAATCCGTAGAAATGCGGTCTAATACCTTATGTGTTCCGACGAAGACATCTGAATTGGAATAAAGATTTATCGGTTATGGATGGGGATGCGTCTGATTAGATTGTTGGCGGGGCAACGGCCCACCAAGTCTACGATCAGTAGGGGTTCTGAGAGGAAGGTCCCCCACATTGGAACTGAGACACGGTC	Bacteroidetes	Bacteroidia	Bacteroidales	Prevotellaceae	Prevotella	S000365828	1	1394	P. ruminicola; TC2-3; AF218617	P. ruminicola
OTU55	GATGAACGCTAGCTACAGGCTTAACACATGCAAGTCGAGGGGAAACGGCATTTTAGCTTGCTAAGATGGACGTCGACCGGCGAATGGGTGAGTAACGCGTATCCAACCTTCCGTTAAGTAGGGAATAGCCTTGCGAAAGTAAGATTAATGCCCTATGTGGTGTTTTGAGGACATCTGAAGAGCACCAAAGGTTTACCGCTTAACGATGGGGATGCGTCTGATTAGGTTGTTGGCGGGGCAACGGCCCACCAAGCCTACGATCAGTAGGGGTTCTGAGAGGAAGGTCCCCCACATTGGAACTGAGACACGGTC	Bacteroidetes	Bacteroidia	Bacteroidales	Prevotellaceae	Prevotella	S000336536	0.977	1368	unidentified rumen bacterium 12-104; AF018483	unidentified rumen bacterium
OTU59	GATGAACGCTAGCTACAGGCTTAACACATGCAAGTCGAGGGGCAGCATATCGAAAGCTTGCTTTTGATGATGGCGACCGGCGCACGGGTGAGTAACGCGTATCCAACCTTCCCTATACTAGAGGATAGCCCGGCGAAAGTCGGATTAATACTCTATGTTCTTCGTAGAAGACATCTGAAATGAAGCAAAGGTTTACCGGTATAGGATGGGGATGCGTCTGATTAGGTTGTTGGCGGGGTAACGGCCCACCAAGCCCACGATCAGTAGGGGTTCTGAGAGGAAGGTCCCCCACATTGGAACTGAGACACGGTC	Bacteroidetes	Bacteroidia	Bacteroidales	Prevotellaceae	Unclassified Prevotellaceae	S002027663	1	1422	uncultured rumen bacterium; L406RC-1-E02; GU303561	uncultured rumen bacterium
OTU6	GATGAACGCTGGCGGCGCGCCTAACACATGCAAGTCGAACGGTTAAAGCACCTTCGGGTGTGTATAAAGTGGCGAACGGCTGAGTAACACGTGGGCAACCTGCCCCTCGCACCGGGATAGCCTCGGGAAACCGTGGTTAATACCGGATACTCCGGGACCCCCGCATGGGGGCGCCGGGAAAGCCCTGACGGCGAGGGATGGGCCCGCGGCCTGTTAGCTTGTTGGCGGGGTAACGGCCCACCAAGGCGATTATGGGTAGCCGGGTTGAGAGACCGACCGGCCAGATTGGGACTGAGACACGGCCCAG	Actinobacteria	Actinobacteria	Coriobacteriales	Coriobacteriaceae	Olsenella	S001872603	0.983	1343	O. umbonata; A2; AJ251324	O. umbonata
OTU60	GATGAACGCTGGCGGCGTGCTTAACACATGCAAGTCGAACGGGATCGGCTGGAGCTTGCTCCGGCCGTGAGAGTGGCGAACGGGTGAGTAATGCGTGACCGACCTGCCCCGTACACCGGAATAGCTCCTGGAAACGGGTGGTAATGCCGGATGCTCCAATGCGATGCATGTCGCGTTGGGAAAGATTTCATCGGTACGGGATGGGGTCGCGTCCTATCAGGTAGTCGGCGGGGTAACGGCCCACCGAGCCTACGACGGGTAGCCGGCCTGAGAGGGCGACCGGCCACATTGGGACTGAGATACGGCCCAG	Actinobacteria	Actinobacteria	Bifidobacteriales	Bifidobacteriaceae	Bifidobacterium	S001875321	0.993	1385	B. merycicum; KCTC 3369; GU361825	B. merycicum
OTU630	GATGAACGCTAGCTACAGGCTTAACACATGCAAGTCGAGGGGCATCAGGACGATAGCTTGCTATTGTTGCTGGCGACCGGCGCACGGGTGAGTAACGCGTATCCAACCTTCCCTATAGTAGAGAATAGCCCGGCGAAAGTCGGATTAATGCTCTATGTTGTGTTTTGATGACATCTGACGAACACCAAAGGTTCACCGCTATAGGATGGGGATGCGTCTGATTAGGTAGTAGGCGGGGCAACGGCCCACCTAGCCGACGATCAGTAGGGGTTCTGAGAGGAAGGTCCCCCACATTGGAACTGAGACACGGTC	Bacteroidetes	Bacteroidia	Bacteroidales	Prevotellaceae	Unclassified Prevotellaceae	S000380158	0.82	1448	P. ruminicola; L16; AY699286	P. ruminicola
OTU65	GATGAACGCTGGCGGCGTGCCTAATACATGCAAGTCGGACGGAGCGCTTCGGCGCTCAGTGGCGAACGGGTGAGTAGCACATGGGCAACCTGCCCTTCAGAGGGGGACAACAGCTGGAAACGGCTGCTAAGACCGCATAGGCGCGGACGGGACATCCCGTCCACGTTAAACGTCCTTTCGGGGACGGCTGAAGGATGGGCCTGTGGCGCATTAGCTTGTTGGCGGGGCAACGGCCCACCAAGGCGACGATGCGTAGCCGGCCTGAGAGGGCGGACGGCCACACTGGGACTGAGACACGGCCCAG	Firmicutes	Erysipelotrichia	Erysipelotrichales	Erysipelotrichaceae	Sharpea	S001093292	1	1350	S. azabuensis; HM250; AB360600	S. azabuensis
OTU66	GACGAACGCTGGCGGCGTGCCTAACACATGCAAGTCGAACGGAACTATTTTGACTGATTCCTTCGGGATGAAGAATTTTTAGTTTAGTGGCGGACGGGTGAGTAACGCGTGAGTAACCTGCCTCTGAGAGGGGAATAACGTTCTGAAAAGAACGCTAATACCGCATAACACATATTTGCCGCATGACAGATATGTCAAAGATTTTATCGCTCGGAGATGGACTCGCGTCCGATTAGTTAGTTGGTGAGGTAACGGCTCACCAAGACCGCGATCGGTAGCCGGACTGAGAGGTTGAACGGCCACATTGGGACTGAGACACGGCCCAG	Firmicutes	Clostridia	Clostridiales	Ruminococcaceae	Unclassified Ruminococcaceae	S001925320	1	1315	uncultured bacterium; 8-2D13; FJ682159	uncultured bacterium
OTU663	ATTGAACGCTGGCGGCAGGCCTAATACATGCAAGTCGAACGGTAACAGTAGAAAAGCTTGCTTTTCTAGCTGACGAGTGGCGGACGGGTGAGTAACATTTGGGAAACTACCTGATAGAGGGGGACAACAGTTGGAAACGACTGCTAATACCGCATAAAGCCTGAGGGTGAAAGCAGCAATGCGCTATCAGATGTGCCCAAACGGGATTAGCTAGTAGGTGAGGTAAAGGCTCACCTAGGCGACGATCTCTAGCTGGTCTGAGAGGATGATCAGCCACATTGGGACTGAGACACGGCCCAG	Proteobacteria	Gammaproteobacteria	Aeromonadales	Succinivibrionaceae	Unclassified Succinivibrionaceae	S002026720	1	1392	uncultured rumen bacterium L206RC-2-B05; GU302618	uncultured rumen bacterium
OTU67	GATGAACGCTAGCTACAGGCTTAACACATGCAAGTCGAGGGGTAACGACAGCGAAAGCTTGCTTTTGCTGGGCGACGACCGGCGAATGGGTGAGTAACGCGTATCCAACCTGCCGCAAAGTAGGGCACAGCCTTGCGAAAGTAAGATTAATGCCCTATGTGCTGTGATGATGACATCAGAATTGCAGTAAAGGTTCACCGCTTTGCGATGGGGATGCGTCTGATTAGGTTGTTGGCGGGGTAACGGCCCACCAAGCCCGCGATCAGTAGGGGTTCTGAGAGGAAGGTCCCCCACATTGGAACTGAGACACGGTC	Bacteroidetes	Bacteroidia	Bacteroidales	Prevotellaceae	Unclassified Prevotellaceae	S000561207	1	1369	uncultured rumen bacterium; 4C28d-23; AB034149	uncultured rumen bacterium
OTU699	GATGAACGCTGGCGGCAGGCTTAATACATGCAAGTCGAACGGTAAGGTCCGAAGTGGCAACACGGAGGATACACGAGTGGCGCACGGGTGCGTAACGCGTATGCAACCTGCCCCCGACCGGGACAAAACAGCTGGAAACGGCTGCTAATATCCCATGGTCATGCGGAAGGGCATCCTTCTTCATGTAAAGATTCATTGGTCGGGGATGGGCATGCGTATTATTAGGTAGTTGGCGGGGTAACGGCCCACCAAGCCGACGATGATTAGGGGTCCTGAGAGGGTTAACCCCCACACTGGAACTGAGACACGGTCCAG	Bacteroidetes	Unclassified Bacteroidetes	Unclassified Bacteroidetes	Unclassified Bacteroidetes	Unclassified Bacteroidetes	S002826808	1	0509	uncultured bacterium; GDIC2IK01CY5L2; JF616626	uncultured bacterium
OTU758	GATGAACGCTAGCTACAGGCTTAACACATGCAAGTCGAGGGGCAGCACGTGGGTAGCAATACCCTGGGTGGCGACCGGCGCACGGGTGAGTAACGCGTATCCAACCTGGCCCATAGTAGGGAACAGCCCGGCGAAAGTCGGATTAATGCCCTATGTTTTCCTCAGTGAGCATTTTATGAGGAACAAAGACTTGTCGCTATGGGATGGGGATGCGTCCGATTAGGCAGCAGGCGGGGCAACGGCCCACCTGGCCTTCGATCGGTAGGGGTTCTGAGAGGAAGGTCCCCCACACTGGTACTGAGACACGGACCAG	Bacteroidetes	Bacteroidia	Bacteroidales	Unclassified Bacteroidales	Unclassified Bacteroidales	S001160004	0.714	1352	uncultured rumen bacterium; BF318; EU850530	uncultured rumen bacterium
OTU8	GATGAACGCTGGCGGCGCGCCTAACACATGCAAGTCGAACGGTTAAGGCGCCCCTCGGGGCGCGAATAGAGTGGCGAACGGCTGAGTAACACGTGGGCAACCTGCCCCTCGCACCGGGACAGCCTCGGGAAACCGTGGTTAATACCGGATGAGCCGCCCCCGTCGCATGGCGGGGGCGGGAAAGCCCAGACGGCGAGGGATGGGCCCGCGGCCTGTTAGCTAGTTGGCGGGGCAACGGCCCACCAAGGCGATGATGGGTAGCCGGGTTGAGAGACCGACCGGCCAGATTGGGACTGAGACACGGCCCAG	Actinobacteria	Actinobacteria	Coriobacteriales	Coriobacteriaceae	Olsenella	S000390777	0.829	1362	O. uli (T); ATCC49627; AF292373	O. uli
OTU805	GATGAACGCTAGCGACAGGCCTAACACATGCAAGTCGAGGGGCAGCGGGAGCAAAGCTTGCTTTGCTTGCCGGCGACCGGCGCACGGGTGAGTAACGCGTATGCAACCTGCCTGTAACAGGGGGATAACCCGGAGAAATCCGGCCTAACACCGCATAACACATGTAAGCCGCATGGTTTTCATGTCAAATATTCGTAGGTTACAGATGGGCATGCGTCCGATTAGCTAGTTGGCGGGGTAACGGCCCACCAAGGCTGCGATCGGTAGGGGTTCTGAGAGGAAGGTCCCCCACATTGGAACTGAGACACGGTC	Bacteroidetes	Bacteroidia	Bacteroidales	Unclassified Bacteroidales	Unclassified Bacteroidales	S001058690	0.977	1313	uncultured bacterium; CAP_aai00g10; EU459591	uncultured bacterium
OTU82	GATGAACGCTAGCTACAGGCTTAACACATGCAAGTCGAGGGGAAACGATGCGGAAGCTTGCTTCTGCAGGCGTCGACCGGCGCACGGGTGAGTAACGCGTATCCAACCTGCCCCGAGGTAAGGAATAATCCGTAGAAATGCGGTCTAATACCTTATGTGTTCCGAAGAGGACATCTGATTTGGAATAAAGATTTATCGCCTTGGGATGGGGATGCGTCTGATTAGATTGTTGGCGGGGCAACGGCCCACCAAGTCACCGATCAGTAGGGGTTCTGAGAGGAAAGTCCCCCACATTGGAACTGAGACACGGTC	Bacteroidetes	Bacteroidia	Bacteroidales	Prevotellaceae	Unclassified Prevotellaceae	S000336587	0.832	1016	unidentified rumen bacterium 30-40; AF018534	unidentified rumen bacterium

## Sheet: Duodenal Fluid
Supplementary Data 3
Duodenal fluid samples
In this table, time points are compared and the top three OTUs listed that contribute the most to the difference between time point communities.
Duodenal fluid samples
Time point 1	Time point 2	Global-R	p-value	Higher in time point 1	OTU-Time point 1	Higher in time point 2	OTU-Time point 2
-42	+100	0.852	0.0002	g_Succiniclasticum, g_Ruminobacter, g_uncl. Lachnospiraceae	OTU38, OTU104, OTU1830	g_uncl. Gammaproteobacteria, g_uncl. Prevotellaceae, s_Olsenella uli	OTU11, OTU14, OTU8
-42	+118	0.859	0.0003	g_Succiniclasticum, g_Ruminobacter, g_uncl. Gammaproteobacteria	OTU38, OTU104, OTU241	s_Olsenella uli, g_uncl. Gammaproteobacteria, g_uncl. Lachnospiraceae	OTU8, OTU11, OTU52
-42	+126	0.758	0.0003	g_Succiniclasticum, g_Ruminobacter, g_uncl. Gammaproteobacteria	OTU38, OTU104, OTU241	s_Olsenella uli, g_uncl. Gammaproteobacteria, g_uncl. Prevotellaceae	OTU8, OTU11, OTU14
-42	+14	0.551	0.003	g_Ruminobacter, s_Prevotella ruminicola, g_uncl. Gammaproteobacteria	OTU104, OTU630, OTU241	s_Olsenella umbonata, g_uncl. Prevotellaceae, s_Prevotella ruminicola	OTU6, OTU14, OTU54
-42	72hC	0.337	0.015	g_Ruminobacter, g_Succiniclasticum, g_uncl. Lachnospiraceae	OTU104, OTU38, OTU1830	s_Bifidobacterium pseudolongum subsp. Globosum, s_Bifidobacterium merycicum, s_Bifidobacterium merycicum	OTU1, OTU25, OTU31
-14	+118	0.975	0.0006	g_Succiniclasticum, g_uncl. Lachnospiraceae, s_Bifidobacterium pseudolongum subsp. Globosum	OTU38, OTU740, OTU1	g_Ruminobacter, g_uncl. Gammaproteobacteria, g_uncl. Gammaproteobacteria	OTU104, OTU241, OTU310
-14	+100	0.959	0.0006	g_Succiniclasticum, g_uncl. Bacteroidetes, g_uncl. Lachnospiraceae	OTU38, OTU739, OTU740	g_uncl. Gammaproteobacteria, g_uncl. Prevotellaceae, s_Olsenella uli	OTU11, OTU14, OTU8
-14	+126	0.886	0.0006	g_Succiniclasticum, g_uncl. Bacteroidetes, g_uncl. Lachnospiraceae	OTU38, OTU739, OTU740	s_Olsenella uli, g_uncl. Gammaproteobacteria, g_uncl. Prevotellaceae	OTU8, OTU11, OTU14
-14	+14	0.574	0.006	g_uncl. Bacteroidetes, g_uncl. Lachnospiraceae, g_uncl. Gammaproteobacteria	OTU739, OTU740, OTU241	s_Olsenella umbonata, g_uncl. Prevotellaceae, s_Prevotella ruminicola	OTU6, OTU14, OTU54
-14	72hC	0.29	0.045	g_Succiniclasticum, g_uncl. Lachnospiraceae, g_uncl. Bacteroidetes	OTU38, OTU740, OTU739	s_Bifidobacterium pseudolongum subsp. Globosum, s_Bifidobacterium merycicum, s_Bifidobacterium merycicum	OTU1, OTU25, OTU31
+14	12hC	0.556	0.008	s_Olsenella umbonata, g_uncl. Prevotellaceae, s_Prevotella ruminicola	OTU6, OTU14, OTU54	s_Bifidobacterium pseudolongum subsp. Globosum, g_uncl. Ruminococcaceae, g_Ruminobacter	OTU1, OTU333, OTU104
+14	72hC	0.484	0.016	s_Olsenella umbonata, g_uncl. Prevotellaceae, s_Prevotella ruminicola	OTU6, OTU14, OTU54	s_Bifidobacterium pseudolongum subsp. Globosum, s_Bifidobacterium merycicum, s_Bifidobacterium merycicum	OTU1, OTU25, OTU31
+100	72hC	0.969	0.001	g_uncl. Gammaproteobacteria, g_uncl. Prevotellaceae, s_Olsenella uli	OTU11, OTU14, OTU8	s_Bifidobacterium pseudolongum subsp. Globosum, s_Bifidobacterium merycicum, s_Bifidobacterium merycicum	OTU1, OTU25, OTU31
+100	12hC	0.965	0.001	g_uncl. Gammaproteobacteria, g_uncl. Prevotellaceae, s_Olsenella uli	OTU11, OTU14, OTU8	s_Bifidobacterium pseudolongum subsp. Globosum, g_uncl. Ruminococcaceae, g_Succiniclasticum	OTU1, OTU333, OTU38
+100	+14	0.272	0.024	g_uncl. Gammaproteobacteria, g_uncl. Gammaproteobacteria, s_Olsenella uli	OTU11, OTU47, OTU8	s_Olsenella umbonata, g_uncl. Prevotellaceae, g_uncl. Prevotellaceae	OTU6, OTU20, OTU14
12hL	-42	0.737	0.0003	g_uncl. Prevotellaceae, s_Olsenella uli, g_uncl. Gammaproteobacteria	OTU14, OTU8, OTU11	g_Ruminobacter, g_uncl. Gammaproteobacteria, g_uncl. Gammaproteobacteria	OTU104, OTU241, OTU310
12hL	-14	0.922	0.0006	g_uncl. Prevotellaceae, g_uncl. Gammaproteobacteria, s_Olsenella uli	OTU14, OTU11, OTU8	g_Succiniclasticum, g_uncl. Bacteroidetes, g_uncl. Lachnospiraceae	OTU38, OTU739, OTU740
12hL	24hC	0.768	0.0006	g_Succiniclasticum, g_Olsenella, s_Lactobacillus aviarius	OTU38, OTU294, OTU1339	g_uncl. Gammaproteobacteria, g_uncl. Prevotellaceae, g_uncl. Prevotellaceae	OTU11, OTU14, OTU20
12hL	12hC	0.969	0.001	g_uncl. Prevotellaceae, g_uncl. Gammaproteobacteria, s_Olsenella uli	OTU14, OTU11, OTU8	s_Bifidobacterium pseudolongum subsp. Globosum, g_uncl. Ruminococcaceae, g_Ruminobacter	OTU1, OTU333, OTU104
12hL	72hC	0.95	0.001	g_uncl. Prevotellaceae, g_uncl. Gammaproteobacteria, g_Olsenella	OTU14, OTU11, OTU8	s_Bifidobacterium pseudolongum subsp. Globosum, g_Bifidobacterium, g_Bifidobacterium	OTU1, OTU25, OTU31
12hL	+14	0.394	0.006	s_Olsenella uli, g_Olsenella, g_Prevotella	OTU8, OTU294, OTU55	s_Olsenella umbonata, g_uncl. Prevotellaceae, g_uncl. Prevotellaceae	OTU6, OTU20, OTU14
24hL	-42	0.691	0.0003	g_uncl. Prevotellaceae, g_Ruminobacter, g_uncl. Lachnospiraceae	OTU14, OTU104, OTU52	g_Succiniclasticum, g_uncl. Gammaproteobacteria, g_uncl. Gammaproteobacteria	OTU38, OTU310, OTU241
24hL	-14	0.926	0.0006	g_uncl. Prevotellaceae, g_Ruminobacter, g_uncl. Lachnospiraceae	OTU14, OTU104, OTU52	g_Succiniclasticum, g_uncl. Bacteroidetes, g_uncl. Lachnospiraceae	OTU38, OTU739, OTU740
24hL	12hC	0.987	0.002	g_uncl. Prevotellaceae, g_Ruminobacter, g_uncl. Lachnospiraceae	OTU14, OTU104, OTU52	s_Bifidobacterium pseudolongum subsp. Globosum, g_uncl. Ruminococcaceae, g_Succiniclasticum	OTU1, OTU333, OTU38
24hL	72hC	0.965	0.002	g_uncl. Prevotellaceae, g_Ruminobacter, g_uncl. Lachnospiraceae	OTU14, OTU104, OTU52	s_Bifidobacterium pseudolongum subsp. Globosum, s_Bifidobacterium merycicum, s_Bifidobacterium merycicum	OTU1, OTU25, OTU31
24hL	+14	0.491	0.002	g_Ruminobacter, g_Prevotella, g_uncl. Clostridiales	OTU104, OTU112, OTU578	s_Olsenella umbonata, g_uncl. Prevotellaceae, g_uncl. Prevotellaceae	OTU6, OTU14, OTU20
24hL	+118	0.326	0.017	g_Ruminobacter, g_Prevotella, g_uncl. Clostridiales	OTU104, OTU112, OTU578	g_uncl. Gammaproteobacteria, g_uncl. Prevotellaceae, s_Olsenella uli	OTU11, OTU14, OTU8
24hL	+100	0.202	0.045	g_Ruminobacter, g_Prevotella, g_uncl. Clostridiales	OTU104, OTU112, OTU578	g_uncl. Gammaproteobacteria, g_uncl. Prevotellaceae, g_uncl. Prevotellaceae	OTU11, OTU14, OTU20
72hL	-14	0.964	0.0006	g_uncl. Gammaproteobacteria, g_uncl. Prevotellaceae, g_Prevotella	OTU11, OTU14, OTU112	g_Succiniclasticum, g_uncl. Bacteroidetes, g_uncl. Lachnospiraceae	OTU38, OTU739, OTU740
72hL	-42	0.729	0.0007	g_uncl. Gammaproteobacteria, g_uncl. Prevotellaceae, g_Prevotella	OTU11, OTU14, OTU112	g_Succiniclasticum, g_Ruminobacter, g_uncl. Gammaproteobacteria	OTU38, OTU104, OTU310
72hL	72hC	0.989	0.002	g_uncl. Gammaproteobacteria, g_uncl. Prevotellaceae, g_Prevotella	OTU11, OTU14, OTU112	s_Bifidobacterium pseudolongum subsp. Globosum, s_Bifidobacterium merycicum, s_Bifidobacterium merycicum	OTU1, OTU25, OTU31
72hL	+14	0.493	0.002	s_Ruminococcus bromii, g_Prevotella, s_Olsenella uli	OTU119, OTU112, OTU8	s_Olsenella umbonata, g_uncl. Prevotellaceae, g_uncl. Prevotellaceae	OTU6, OTU14, OTU20
72hL	12hC	1	0.002	g_uncl. Gammaproteobacteria, g_uncl. Prevotellaceae, g_Prevotella	OTU11, OTU14, OTU112	s_Bifidobacterium pseudolongum subsp. Globosum, g_uncl. Ruminococcaceae, g_uncl. Bacteria	OTU1, OTU333, OTU2100
72hL	+118	0.239	0.045	g_Prevotella, s_Ruminococcus bromii, g_Succiniclasticum	OTU112, OTU119, OTU38	g_uncl. Gammaproteobacteria, g_uncl. Prevotellaceae, s_Olsenella uli	OTU11, OTU14, OTU8
+118	12hC	0.979	0.002	s_Olsenella uli, g_uncl. Gammaproteobacteria, g_uncl. Lachnospiraceae	OTU8, OTU11, OTU52	s_Bifidobacterium pseudolongum subsp. Globosum, g_uncl. Ruminococcaceae, g_Succiniclasticum	OTU1, OTU333, OTU38
+118	72hC	0.925	0.002	s_Olsenella uli, g_uncl. Gammaproteobacteria, g_uncl. Lachnospiraceae	OTU8, OTU11, OTU52	s_Bifidobacterium pseudolongum subsp. Globosum, s_Bifidobacterium merycicum, s_Bifidobacterium merycicum	OTU1, OTU25, OTU31
+126	12hC	0.875	0.002	s_Olsenella uli, g_uncl. Gammaproteobacteria, g_uncl. Prevotellaceae	OTU8, OTU11, OTU14	s_Bifidobacterium pseudolongum subsp. Globosum, g_uncl. Ruminococcaceae, g_Succiniclasticum	OTU1, OTU333, OTU38
+126	72hC	0.84	0.002	s_Olsenella uli, g_uncl. Gammaproteobacteria, g_uncl. Prevotellaceae	OTU8, OTU11, OTU14	s_Bifidobacterium pseudolongum subsp. Globosum, s_Bifidobacterium merycicum, g_uncl. Lachnospiraceae	OTU1, OTU25, OTU21
+126	+14	0.275	0.022	s_Olsenella uli, g_uncl. Prevotellaceae, g_uncl. Firmicutes	OTU8, OTU82, OTU218	s_Olsenella umbonata, g_uncl. Prevotellaceae, g_uncl. Prevotellaceae	OTU6, OTU20, OTU14
24hC	+100	0.846	0.0006	g_Clostridium sensu stricto, g_Clostridium sensu stricto, s_Bifidobacterium pseudolongum subsp. Globosum	OTU264, OTU864, OTU1	g_uncl. Gammaproteobacteria, g_uncl. Prevotellaceae, s_Olsenella uli	OTU11, OTU14, OTU8
24hC	+118	0.84	0.0006	s_Clostridium perfringens, s_Bifidobacterium pseudolongum subsp. Globosum, s_Clostridium perfringens	OTU264, OTU1, OTU864	s_Olsenella uli, g_uncl. Gammaproteobacteria, g_uncl. Lachnospiraceae	OTU8, OTU11, OTU52
24hC	+126	0.743	0.0006	s_Clostridium perfringens, s_Clostridium perfringens, s_Bifidobacterium pseudolongum subsp. Globosum	OTU264, OTU864, OTU1	s_Olsenella uli, g_uncl. Gammaproteobacteria, g_uncl. Prevotellaceae	OTU8, OTU11, OTU14
24hC	72hL	0.702	0.0006	s_Clostridium perfringens, s_Clostridium perfringens, g_uncl. Bacteria	OTU264, OTU864, OTU434	g_uncl. Gammaproteobacteria, g_uncl. Prevotellaceae, g_uncl. Lachnospiraceae	OTU11, OTU14, OTU52
24hC	24hL	0.693	0.0006	s_Clostridium perfringens, s_Clostridium perfringens, s_Bifidobacterium pseudolongum subsp. Globosum	OTU264, OTU864, OTU1	g_uncl. Prevotellaceae, g_Ruminobacter, g_uncl. Lachnospiraceae	OTU14, OTU104, OTU52
24hC	+14	0.416	0.009	s_Clostridium perfringens, s_Clostridium perfringens, g_uncl. Bacteria	OTU264, OTU864, OTU434	s_Olsenella umbonata, g_uncl. Prevotellaceae, s_Prevotella ruminicola	OTU6, OTU14, OTU54

## Sheet: RDP_Duodenum
Supplementary Data 3
Duodenal fluid samples
Time points are compared and the top three OTUs listed that contribute the most to the difference between time point communities. The most contributing OTUs were blasted in RDP and listed below.
Duodenum	RDP blast on 05.06.2020
							RDP Output
OUT	Sequence	Phylum	Class	Order	Family	Genus	RDP_ID	S_ab score	unique common oligomers	sequence full name	final species
OTU1	GATGAACGCTGGCGGCGTGCTTAACACATGCAAGTCGAACGGGATCCCTGGCAGCTTGCTGCCGGGGTGAGAGTGGCGAACGGGTGAGTAATGCGTGACCGACCTGCCCCATGCACCGGAATAGCTCCTGGAAACGGGTGGTAATGCCGGATGTTCCACATGAGCGCATGCGAGTGTGGGAAAGGCTTTTTGCGGCATGGGATGGGGTCGCGTCCTATCAGCTTGTTGGTGGGGTAACGGCCTACCAAGGCGTTGACGGGTAGCCGGCCTGAGAGGGCGACCGGCCACATTGGGACTGAGATACGGCCCAG	Actinobacteria	Actinobacteria	Bifidobacteriales	Bifidobacteriaceae	Bifidobacterium	S000399337	1.000	0598	Bifidobacterium pseudolongum subsp. globosum; 02-2; AY166515	Bifidobacterium pseudolongum subsp. Globosum
OTU104	ATTGAACGCTGGCGGCAGGCTTAATACATGCAAGTCGAACGGTAACGGCAGGAAGCTTGCTTCCTGGCTGACGAGTGGCGGACGGGTGAGTAATACCTGGGGAGCTGCCTGAATGAGGGGGACAACACCTGGAAACGGGTGCTAATACCGCGTAAGCCCTGAGGGGGAAAGGCCGGGCAACCGGTCGCATTCAGATGCGCCCAGGTGGGATTAGCTAGTTGGTGGGGTAACGGCCTACCAAGGCGACGATCTCTAGCTGGTCTGAGAGGATGATCAGCCACACTGGAACTGAGACACGGTCCAG	Proteobacteria	Gammaproteobacteria	Aeromonadales	Succinivibrionaceae	Ruminobacter	S001148823	1.000	1362	uncultured rumen bacterium; CF241; EU871390	uncultured rumen bacterium
OTU11	ATTGAACGCTGGCGGCAGGCTTAACACATGCAAGTCGTACGGTAACAGAGGGAAGCTTGCTTCTCTGCTGACGAGTGGCGGACGGGTGAGTAATGTCTGGGAAGCTGCCTGCTTGAGGGGGATAGCGGAGCGAAAGTTCCGATAATACCGCGTAAGCCCGAGAGGGGAAAGTGCGGGACCGCAAGGCCGCACGCGAGCAGATGCGCCCAGATGGGATTAGGCAGTTGGGGAGGTAACGGCTCACCAAACCGATGATCTCTAGCTGGTTTGAGAGGACAATCAGCCACATTGGAATTGAGAAACGGAC	Proteobacteria	Gammaproteobacteria	Unclassified Gammaproteobacteria	Unclassified Gammaproteobacteria	Unclassified Gammaproteobacteria	S002238148	1.000	0780	uncultured proteobacterium; L1f11UD; HM105082	uncultured proteobacterium
OTU112	GATGAACGCTAGCTACAGGCTTAACACATGCAAGTCGAGGGGCAGCATAACGAAAGCTTGCTTTTGTTGATGGCGACCGGCGCACGGGTGAGTAACGCGTATCCAACCTTCCCTATAGTAGAGAATAGCCCGGCGAAAGTCGAATTAATGCTCTATGTTCTTCTTTGATGGCATCTGACGAGAAGCAAAGGTTCACCGCTATAGGATGGGGATGCGTCTGATTAGGTTGTTGGCGGGGTAACGGCCCACCAAGCCTACGATCAGTAGGGGTTCTGAGAGGAAGGTCCCCCACATTGGTACTGAGACACGGAC	Bacteroidetes	Bacteroidia	Bacteroidales	Prevotellaceae	Prevotella	S000336567	0.977	1020	unidentified rumen bacterium 30-17; AF018514	unidentified rumen bacterium
OTU119	GACGAACGCTGGCGGCGTGCCTAACACATGCAAGTCGAACGGAACTGCTTCGAAGGATTTCTTCGGAATGACATTGATTCAGTTTAGTGGCGGACGGGTGAGTAACGCGTGAGTAACCTGCCTTCAAGAGGGGGATAACATTCTGAAAAGAATGCTAATACCGCATGACATATGATTGTCGCATGGCAGACATATCAAAGATTTATCGCTTGAAGATGGACTCGCGTCCGATTAGTTAGTTGGTGAGGTAACGGCCCACCAAGACCGCGATCGGTAGCCGGACTGAGAGGTTGAACGGCCACATTGGGACTGAGACACGGCCCAG	Firmicutes	Clostridia	Clostridiales	Ruminococcaceae	Unclassified Ruminococcaceae	S000728607	1.000	1400	Ruminococcus bromii; YE282; DQ882649	Ruminococcus bromii
OTU1339	GACGAACGCTGGCGGCGTGCCTAATACATGCAAGTCGAACGAGAATTTCTTACACCGAATGCTTGCATTCACCGTAAGAATTCGAGTGGCGGACGGGTGAGTAACACGTGGGTAACCTGCCCAAAAGAAGGGGATAACATTTGGAAACAAATGCTAATACCGTATAACCATGATGACCGCATGGTCATTATGTGAAAGGTGGTTCTGCTATCGCTTTTGGATGGACCCGCGGCGTATTAACTAGTTGGTAGGGTAACGGCCTACCAAGGTGATGATACGTAGCCGAACTGAGAGGTTGATCGGCCACAATGGGACTGAGACACGGCCCAT	Firmicutes	Bacilli	Lactobacillales	Lactobacillaceae	Lactobacillus	S000841426	0.891	1433	Lactobacillus aviarius; LAV2; AB175727	Lactobacillus aviarius
OTU14	GATGAACGCTAGCTACAGGCTTAACACATGCAAGTCGAGGGGAAACGATTAGAGGTGCTTGCACCACTAAGGCGTCGACCGGCGCACGGGTGAGTAACGCGTATCCAACCTGCCCCATGGTAAGGAATAATCCGTAGAAATGCGGTCTAATACCTTATGTGCTCCGAAGAGGACATCTGATTTGGAGTAAAGATTTATCGCCATGGGATGGGGATGCGTCTGATTAGATTGTTGGCGGGGCAACGGCCCACCAAGTCACCGATCAGTAGGGGTTCTGAGAGGAAAGTCCCCCACATTGGAACTGAGACACGGTC	Bacteroidetes	Bacteroidia	Bacteroidales	Prevotellaceae	Unclassified Prevotellaceae	S000336519	1.000	1016	unidentified rumen bacterium 12-44; AF018466	unidentified rumen bacterium
OTU1830	GATGAACGCTGGCGGCGTGCTTAACACATGCAAGTCGAACGAAGCACTTTACTTAGATCCCTTCGGGGTGACGAGTTTTGTGACTGAGTGGCGGACGGGTGAGTAACGCGTGGGTAACCTGCCTTATACAGGGGGATAACAGTTAGAAATGACTGCTAATACCGCATAACCCGCTAGTATCGCATGATACAGACGGAAAAGATTTATCGGTATAAGATGGACCCGCGTCTGATTAGCTAGTTGGTGAGGTAACGGCTCACCAAGGCGACGATCAGTAGCCGGCTTGAGAGAGTGAACGGCCACATTGGGACTGAGACACGGCC	Firmicutes	Clostridia	Clostridiales	Lachnospiraceae	Unclassified Lachnospiraceae	S002834397	0.965	0500	uncultured bacterium; GDIC2IK01BAD7P; JF631919	uncultured bacterium
OTU20	GATGAACGCTAGCTACAGGCTTAACACATGCAAGTCGAGGGGTAACGACAGCGAAAGCTTGCTTTTGCTGGGCGACGACCGGCGAATGGGTGAGTAACGCGTATCCAACCTGCCGCAAAGTAGGGCACAGCCTTGCGAAAGTAAGATTAATGCCCTATGTGCTGTGATGAGGACATCTGAATTGCAGTAAAGGTTCACCGCTTTGCGATGGGGATGCGTCTGATTAGGTTGTTGGCGGGGTAACGGCCCACCAAGCCCGCGATCAGTAGGGGTTCTGAGAGGAAGGTCCCCCACATTGGAACTGAGACACGGTC	Bacteroidetes	Bacteroidia	Bacteroidales	Prevotellaceae	Unclassified Prevotellaceae	S004212083	0.954	0506	uncultured Prevotella sp.; R015; AB935199	uncultured Prevotella sp.
OTU21	GATGAACGCTGGCGGCGTGCCTAACACATGCAAGTCGAACGGGGTTAAGGGAAATTTTCGGATGGAACTTAACTTAGTGGCGGACGGGTGAGTAACGCGTGGATAACCTGCCTCACACTGGGGGATAGCAGCTGGAAACGGCTGGTAATACCGCATAAGACCACAGCACCGCATGGTGCAGGGGTAAAAGATTTATCGGTGTGAGATGGATCCGCGTCTGATTAGCCAGTTGGCGGGGTAACGGCCCACCAAAGCGACGATCAGTAGCCGGCCTGAGAGGGTGAACGGCCACATTGGGACTGAGACACGGCC	Firmicutes	Clostridia	Clostridiales	Lachnospiraceae	Unclassified Lachnospiraceae	S003645130	1.000	1438	uncultured rumen bacterium; YRMCA115; KC162993	uncultured rumen bacterium
OTU2100	AACGAACGCTGGTAGCGTGGATTAGGCATGCAAGTCGAACGGGATCGCCGAGTTAGCAATAACAAGGCGTGAGAGTGGCGGATTGGGGAGGAACACGTGAGCAACCTGCCTTTGAGTTGGGGAAAACCGTTGGAAACGACGGCTAATACCGGATGTGGCGCCTGGGGACATCCCCGGAGCGCTAAAGGGGGCGACCCGCAAGGGGCTCCCGCTCGAAGATGGGCTCGCGCACCATCAGCTTGTTGGCGGGGTAACGGCCCACCAAGGCTTACGGTTAGCTGGTCTGAGAGGATGACCAGCCCCACTGGGACTGAGATACTGCCCAG	Unclassified Bacteria	Unclassified Bacteria	Unclassified Bacteria	Unclassified Bacteria	Unclassified Bacteria	S002847386	0.959	0505	uncultured bacterium; GDIC2IK01A48F8; JF656426	uncultured bacterium
OTU218	GATGAACGCTGGCGGCGTGCCTAACACATGCAAGTCGAGCGGAGTTAACAGAAGATTCTTCGGATGATTTTGTTAACTTAGCGGCGGATGGGTGAGTAACACGTGGGTAATCTGCCCTGCACAGGGGGATAACAGCTGGAAACGGCTGTTAATACCGCATATGCACACGTTATCGCATGATAGAGTGTGGAAAGATTTATCGGTGCAGGATGAGCCCGCGTCGGATTAACTGGTTGGCAGGGTAACGGCCTACCAAGGTGATGATCCGTAGCCGGCCTGAGAGGGCGACCGGCCACATTGGGACTGAGACACGGCC	Firmicutes	Unclassified Firmicutes	Unclassified Firmicutes	Unclassified Firmicutes	Unclassified Firmicutes	S001068065	0.926	1285	uncultured bacterium; SP2_a12_2; EU468966	uncultured bacterium
OTU241	ATTGAACGCTGGCGGCAGGCCTAATACATGCAAGTCGAACGGTAACATGGAAGTAGCAATACTTTTGATGACGAGTGGCGGACGGGTGAGTAATATTTGGGAATCTACCTATCAGAGGGGGATAGCAACTGGAAACGGTTGATAAGACCGCGTACGCTCTGAGGAGGAAAGTAATGGGATCGAAAGACCATTAGCTGATAGATGAGCCCAAACGGGATTAGCTAGTAGGCGGGGTAAGGGCCCACCTAGGCGACGATCTCTAGCTGGTTTTAGCGGATGATCAGCCACATTGGAACTGAGACACGGTC	Proteobacteria	Gammaproteobacteria	Unclassified Gammaproteobacteria	Unclassified Gammaproteobacteria	Unclassified Gammaproteobacteria	S002845719	0.987	0510	uncultured bacterium; GDIC2IK01BNNJ9; JF653038	uncultured bacterium
OTU25	GATGAACGCTGGCGGCGTGCTTAACACATGCAAGTCGAACGGGATCGGCTGGAGCTTGCTCCGGCCGTGAGAGTGGCGAACGGGTGAGTAATGCGTGACCGACCTGCCCCGTACACCGGAATAGCTCCTGGAAACGGGTGGTAATGCCGGATGCTCCAATGCGATGCATGTCGCGTTGGGAAAGATTTCATCGGTATGGGATGGGGTCGCGTCCTATCAGGTAGTCGGCGGGGTAACGGCCCACCGAGCCTACGACGGGTAGCCGGCCTGAGAGGGCGACCGGCCACATTGGGACTGAGATACGGCCCAG	Actinobacteria	Actinobacteria	Bifidobacteriales	Bifidobacteriaceae	Bifidobacterium	S001875321	1.000	1385	Bifidobacterium merycicum; KCTC 3369; GU361825	Bifidobacterium merycicum
OTU264	GATGAACGCTGGCGGCGTGCTTAACACATGCAAGTCGAGCGATGAAGTTTCCTTCGGGAAACGGATTAGCGGCGGACGGGTGAGTAACACGTGGGTAACCTGCCTCATAGAGTGGAATAGCCTTCCGAAAGGAAGATTAATACCGCATAATGTTGAAAGATGGCATCATCATTCAACCAAAGGAGCAATCCGCTATGAGATGGACCCGCGGCGCATTAGCTAGTTGGTGGGGTAACGGCCTACCAAGGCGACGATGCGTAGCCGACCTGAGAGGGTGATCGGCCACATTGGGACTGAGACACGGCCCAG	Firmicutes	Clostridia	Clostridiales	Clostridiaceae 1	Clostridium sensu stricto	S000383296	1.000	1427	Clostridium perfringens; 13; AB045284	Clostridium perfringens
OTU294	GATGAACGCTGGCGGCGCGCCTAACACATGCAAGTCGAACGGTTAAGCCACCTTCGGGTGGGAATAAAGTGGCGAACGGCTGAGTAACACGTGGGCAACCTGCCCCTCGCACCGGGACAGCCTCGGGAAACCGTGGATGATACCGGATACTCCGCCTCCCCCGCATGGGGAGGGCGGGAAAGCCCAGACGGCGAGGGATGGGCCCGCGGCCTGTTAGCTAGTTGGCGGGGCAGCGGCCCACCAAGGCGATGATGGGTAGCCGGGTTGAGAGACCGACCGGCCAGATTGGGACTGAGACACGGCCCAG	Actinobacteria	Actinobacteria	Coriobacteriales	Coriobacteriaceae	Olsenella	S001196046	1.000	0821	uncultured bacterium; Ontario1455; FJ390806	uncultured bacterium
OTU31	GATGAACGCTGGCGGCGTGCTTAACACATGCAAGTCGAACGGGATCCAGGCAGCTTGCTGCCTGGTGAGAGTGGCGAACGGGTGAGTAATGCGTGACCGACCTGCCCCGTACACCGGAATAGCTCCTGGAAACGGGTGGTAATGCCGGATGCTCCAATGCGATGCATGTCGCGTTGGGAAAGATTTCATCGGTATGGGATGGGGTCGCGTCCTATCAGGTAGTCGGCGGGGTAACGGCCCACCGAGCCTACGACGGGTAGCCGGCCTGAGAGGGCGACCGGCCACATTGGGACTGAGATACGGCCCAG	Actinobacteria	Actinobacteria	Bifidobacteriales	Bifidobacteriaceae	Bifidobacterium	S001875321	0.932	1385	Bifidobacterium merycicum; KCTC 3369; GU361825	Bifidobacterium merycicum
OTU310	ATTGAACGCTGGCGGCAGGCCTAATACATGCAAGTCGAACGGTAACATGGAAGTAGCAATACTTTTGATGACGAGTGGCGGACGGGTGAGTAATATTTGGGAATCTACCTATCAGAGGGGGATAGCAACTGGAAACGGTTGATAAGACCGCGTACGCTCTGAGGAGGAAAGTAATGGGATCGCAAGACCATTAGCTGATAGATGAGCCCAAACGGGATTAGCTAGTAGGCGGGGTAAGGGCCCACCTAGGCGACGATCTCTAGCTGGTTTTAGCGGATGATCAGCCACATTGGAACTGAGACACGGTC	Proteobacteria	Gammaproteobacteria	Unclassified Gammaproteobacteria	Unclassified Gammaproteobacteria	Unclassified Gammaproteobacteria	S000336504	0.973	0997	unidentified rumen bacterium JW34; AF018451	unidentified rumen bacterium
OTU333	GATGAACGCTGGCGGCGTGCTTAACACATGCAAGTCGAACGGAGAACTGCCCTTCGGGACGGTTCTTAGTGGCGGACGGGTGAGTAACGCGTGAGGAACCTGCCTTGGAGTGGGGAATAACGGCTGGAAACGGCCGCTAATACCGCATAATGCAGTTGGGTCGCATGGCTCTGACTGCCAAAGATTTATTGCTCTGAGATGGCCTCGCGTCTGATTAGCTGGTTGGTGAGGTAACGGCTCACCAAGGCGACGATCAGTAGCCGGACTGAGAGGTTGGCCGGCCACATTGGGACTGAGACACGGCCCAG	Firmicutes	Clostridia	Clostridiales	Ruminococcaceae	Unclassified Ruminococcaceae	S000991199	1.000	1389	uncultured rumen bacterium; P5_P12; EU381849	uncultured rumen bacterium
OTU38	GACGAACGCTGGCGGCGTGCCTAACACATGCAAGTCGAACGGGGATTTTGTTTCGGCAGAATCCTAGTGGCGAACGGGTGAGTAACGCGTAGGCAACCTGCCCTCCGGCCGGGGACAACACTCCGAAAGGGGTGCTAATACCGGATACGAAGTCTGTGCCGCATGGTACGGATTTGAAAGATGGCCTCTATTTATAAGCTATCGCCGGGGGATGGGCCTGCGTCCGATTAGCTGGTTGGTGGGGTAACGGCCTACCAAGGCGACGATCGGTAGCCGGTCTGAGAGGATGAACGGCCACATTGGGACTGAGACACGGCCCAG	Firmicutes	Negativicutes	Selenomonadales	Acidaminococcaceae	Succiniclasticum	S000404468	1.000	1425	uncultured rumen bacterium; BS20; AY244974	uncultured rumen bacterium
OTU434	GATTAACGCTGGCGGCATGCCTAATACATGCAAGTCGAACGAGTGTAGCAATACACTAGTGGCAAACGGGTGAGTAACACGTACCCAATCTACCATAAAGTGGGGGATACCTAAAAGAAATTTTAGTTAATACCGCATAGGACATTATTATGACATCAGAAAATGTTTAAAAATAGGTTTCTATTGCTTTATGATGAGGGTGCGGCTTATCAGATAGTTGGTGAGGTAACGGCCCACCAAGTCAATGACGAGTATCTGTGCTGAGAGGCAATACAGACACAATGGGACTGAGACACGGCCCAT	Unclassified Bacteria	Unclassified Bacteria	Unclassified Bacteria	Unclassified Bacteria	Unclassified Bacteria	S004430628	1.000	1379	uncultured bacterium; 7b; LN612651	uncultured bacterium
OTU47	ATTGAACGCTGGCGGCAGGCTTAACACATGCAAGTCGTACGGTAACAGAGGGAAGCTTGCTTCTCTGCTGACGAGTGGCGGACGGGTGAGTAATGTCTGGGAAGCTGCCTGCTTGAGGGGGATAGCGGAGCGAAAGTTCCGATAATACCGCGTAAGCCCGAGAGGGGAAAGTGCGGGACCGCAAGGCCGCACGCGAGCAGATGCGCCCAGATGGGATTAGGCAGTTGGGGAGGTAATGGCTCACCAAACCGATGATCTCTAGCTGGTTTGAGAGGACAATCAGCCACATTGGAATTGAGAAACGGAC	Proteobacteria	Gammaproteobacteria	Unclassified Gammaproteobacteria	Unclassified Gammaproteobacteria	Unclassified Gammaproteobacteria	S002027931	1.000	1399	uncultured rumen bacterium; L406RC-4-G08; GU303829	uncultured rumen bacterium
OTU52	GATGAACGCTGGCGGCGTGCCTAACACATGCAAGTCGAACGGACGCTTTGAGGAGAGTCTTCGGATAATTCTTAAAGTTGTTAGTGGCGGACGGGTGAGTAACGCGTGGGGAACCTGCCTTTGTCCGGGGGATAGCAGCTGGAAACGGCTGGTAATACCGCATAAGACCACGAAGCCGCATGGCTTTGCGGTAAAAGATTTATCGGACAGAGATGGACCCGCGTCTGATTAGCCAGTTGGCAGGGTAACGGCCTACCAAAGCAACGATCAGTAGCCGGCCTGAGAGGGCGGACGGCCACATTGGGACTGAGACACGGCCCAG	Firmicutes	Clostridia	Clostridiales	Lachnospiraceae	Unclassified Lachnospiraceae	S003665755	1.000	1453	uncultured bacterium; CONT-91; AB507537	uncultured bacterium
OTU54	GATGAACGCTAGCTACAGGCTTAACACATGCAAGTCGAGGGGTAACGACAGCGAAAGCTTGCTTTTGCTGGGCGACGACCGGCGCACGGGTGAGTAACGCGTATCCAACCTGCCCATAACTAAGGGATAATCCGTAGAAATGCGGTCTAATACCTTATGTGTTCCGACGAAGACATCTGAATTGGAATAAAGATTTATCGGTTATGGATGGGGATGCGTCTGATTAGATTGTTGGCGGGGCAACGGCCCACCAAGTCTACGATCAGTAGGGGTTCTGAGAGGAAGGTCCCCCACATTGGAACTGAGACACGGTC	Bacteroidetes	Bacteroidia	Bacteroidales	Prevotellaceae	Prevotella	S000365829	1.000	1385	Prevotella ruminicola; 223/M2/7; AF218618	Prevotella ruminicola
OTU55	GATGAACGCTAGCTACAGGCTTAACACATGCAAGTCGAGGGGAAACGGCATTTTAGCTTGCTAAGATGGACGTCGACCGGCGAATGGGTGAGTAACGCGTATCCAACCTTCCGTTAAGTAGGGAATAGCCTTGCGAAAGTAAGATTAATGCCCTATGTGGTGTTTTGAGGACATCTGAAGAGCACCAAAGGTTTACCGCTTAACGATGGGGATGCGTCTGATTAGGTTGTTGGCGGGGCAACGGCCCACCAAGCCTACGATCAGTAGGGGTTCTGAGAGGAAGGTCCCCCACATTGGAACTGAGACACGGTC	Bacteroidetes	Bacteroidia	Bacteroidales	Prevotellaceae	Prevotella	S001969238	0.734	0497	uncultured bacterium; PF5813; GU623708	uncultured bacterium
OTU578	GATGAACGCTGGCGGCGTGCTTAACACATGCAAGTCGAACGAAGCACTTTACTTAGATCCCTTCGGGGTGACGAGTTTTGTGACTGAGTGGCGGACGGGTGAGTAACGCGTGGGTAACCTGCCTTACACAGGGGGATAACAGTTAGAAATGACTGCTAATACCGCATAACCCGCTAGTGTCGCATGACACAGACGGAAAAGATTTATCGGTGTAAGATGGACCCGCGTCTGATTAGCTAGTTGGTGAGGTAACGGCTCACCAAGGCGACGATCAGTAGCCGGCTTGAGAGAGTGAACGGCCACATTGGGACTGAGACACGGCC	Firmicutes	Clostridia	Clostridiales	Unclassified Clostridiales	Unclassified Clostridiales	S003667828	0.902	1421	uncultured rumen bacterium; R-C-167; AB615094	uncultured rumen bacterium
OTU6	GATGAACGCTGGCGGCGCGCCTAACACATGCAAGTCGAACGGTTAAAGCACCTTCGGGTGTGTATAAAGTGGCGAACGGCTGAGTAACACGTGGGCAACCTGCCCCTCGCACCGGGATAGCCTCGGGAAACCGTGGTTAATACCGGATACTCCGGGACCCCCGCATGGGGGCGCCGGGAAAGCCCTGACGGCGAGGGATGGGCCCGCGGCCTGTTAGCTTGTTGGCGGGGTAACGGCCCACCAAGGCGATTATGGGTAGCCGGGTTGAGAGACCGACCGGCCAGATTGGGACTGAGACACGGCCCAG	Actinobacteria	Actinobacteria	Coriobacteriales	Coriobacteriaceae	Olsenella	S001872603	0.983	1343	Olsenella umbonata; A2; AJ251324	Olsenella umbonata
OTU630	GATGAACGCTAGCTACAGGCTTAACACATGCAAGTCGAGGGGCATCAGGACGATAGCTTGCTATTGTTGCTGGCGACCGGCGCACGGGTGAGTAACGCGTATCCAACCTTCCCTATAGTAGAGAATAGCCCGGCGAAAGTCGGATTAATGCTCTATGTTGTGTTTTGATGACATCTGACGAACACCAAAGGTTCACCGCTATAGGATGGGGATGCGTCTGATTAGGTAGTAGGCGGGGCAACGGCCCACCTAGCCGACGATCAGTAGGGGTTCTGAGAGGAAGGTCCCCCACATTGGAACTGAGACACGGTC	Bacteroidetes	Bacteroidia	Bacteroidales	Prevotellaceae	Unclassified Prevotellaceae	S000380158	0.820	1448	Prevotella ruminicola; L16; AY699286	Prevotella ruminicola
OTU739	GATGAACGCTAGCGGCAGGCCTAATACATGCAAGTCGAACGGTAAACGCCCCTTCGGGGGCGTGAGAGTGGCGGACGGGTGCGTAACGCGTATGCAACCAACCCCCCGCGGGCGGACAGCCGGTGGAAACGCCGGATGATACGCCATGCGGCCGTCCCGGGGCATCCCGGGGGGGCCAAAGCGGAGACGCGGCGGGGGACGGGCATGCGTCCCATTAGATGGTAGGCGGGGTGACGGCCCACCTAGTCGGCGATGGGTAGGGGATCTGAGAGGACGGTCCCCCACACTGGTACTGAGACACGGACCAG	Bacteroidetes	Unclassified Bacteroidetes	Unclassified Bacteroidetes	Unclassified Bacteroidetes	Unclassified Bacteroidetes	S000991344	0.997	1351	uncultured rumen bacterium; P5_L14; EU381994	uncultured rumen bacterium
OTU740	GATGAACGCTGGCGGCGTGCCTAACACATGCAAGTTGAACGAAGCATCCCCGACAGAAACCTTCGGGTGGAAGATGAGGATGACTGAGTGGCGGACGGGTGAGTAACGCGTGGGTAACCTGCCTTGTACAGGGGGATAACAGTTAGAAATGACTGCTAATACCGCATAAGCGCACAGCATCGCATGGTGCAGTGTGAAAAACTCCGGTGGTACAAGATGGACCCGCGTCTGATTAGCCAGTTGGCAGGGTAACGGCCTACCAAAGCAACGATCAGTAGCCGACTTGAGAGAGTGATCGGCCACATTGGGACTGAGACACGGCCCAG	Firmicutes	Clostridia	Clostridiales	Lachnospiraceae	Unclassified Lachnospiraceae	S002416578	0.776	1288	uncultured Lachnospiraceae bacterium; SGYA666; GQ358376	uncultured Lachnospiraceae bacterium
OTU8	GATGAACGCTGGCGGCGCGCCTAACACATGCAAGTCGAACGGTTAAGGCGCCCCTCGGGGCGCGAATAGAGTGGCGAACGGCTGAGTAACACGTGGGCAACCTGCCCCTCGCACCGGGACAGCCTCGGGAAACCGTGGTTAATACCGGATGAGCCGCCCCCGTCGCATGGCGGGGGCGGGAAAGCCCAGACGGCGAGGGATGGGCCCGCGGCCTGTTAGCTAGTTGGCGGGGCAACGGCCCACCAAGGCGATGATGGGTAGCCGGGTTGAGAGACCGACCGGCCAGATTGGGACTGAGACACGGCCCAG	Actinobacteria	Actinobacteria	Coriobacteriales	Coriobacteriaceae	Olsenella	S000390777	0.829	1362	Olsenella uli (T); ATCC49627; AF292373	Olsenella uli
OTU82	GATGAACGCTAGCTACAGGCTTAACACATGCAAGTCGAGGGGAAACGATGCGGAAGCTTGCTTCTGCAGGCGTCGACCGGCGCACGGGTGAGTAACGCGTATCCAACCTGCCCCGAGGTAAGGAATAATCCGTAGAAATGCGGTCTAATACCTTATGTGTTCCGAAGAGGACATCTGATTTGGAATAAAGATTTATCGCCTTGGGATGGGGATGCGTCTGATTAGATTGTTGGCGGGGCAACGGCCCACCAAGTCACCGATCAGTAGGGGTTCTGAGAGGAAAGTCCCCCACATTGGAACTGAGACACGGTC	Bacteroidetes	Bacteroidia	Bacteroidales	Prevotellaceae	Unclassified Prevotellaceae	S003890342	0.954	0488	uncultured bacterium; BRM_OTU215; KC337808	uncultured bacterium
OTU864	GATGAACGCTGGCGGCGTGCTTAACACATGCAAGTCGAGCGATGAAGTTTCCTTCGGGAAACGGATTAGCGGCGGACGGGTGAGTAACACGTGGGTAACCTGCCTCATAGAGTGGAATAGCCTTCCGAAAGGAAGATTAATACCGCATAACGTTGAAAGATGGCATCATCATTCAACCAAAGGAGCAATCCGCTATGAGATGGACCCGCGGCGCATTAGCTAGTTGGTGGGGTAACGGCCTACCAAGGCGACGATGCGTAGCCGACCTGAGAGGGTGATCGGCCACATTGGGACTGAGACACGGCCCAG	Firmicutes	Clostridia	Clostridiales	Clostridiaceae 1	Clostridium sensu stricto	S000941936	1.000	1363	Clostridium perfringens; JS7; AM889032	Clostridium perfringens
