# Supplementary material for: Cow’s microbiome from antepartum to postpartum: A long-term study covering two physiological challenges
Source: Front Microbiol. 2022 Nov 16;13:1000750. doi: 10.3389/fmicb.2022.1000750 (PMC9709127; doi:10.3389/fmicb.2022.1000750)
Supplement: Supplementary file 4 [file Table_4.XLSX]

## Sheet: Supplementary Data 4
Supplementary Data 4
NMR metabolite data
Sample_ID	001P12hL	001P24hL	001P72hL	001Pm14	001Pm42	001Pp100	001Pp118	001Pp126	001Pp14	039P12hK	039P24hK	039P72hK	039Pm14	039Pm42	039Pp14	245P12hK	245P12hL	245P24hK	245P24hL	245P72hK	245P72hL	245Pm14	245Pm42	245Pp100	245Pp118	245Pp126	245Pp14	248P12hK	248P12hL	248P72hK	248Pm14	248Pm42	248Pp100	304P12hL	304P24hK	304P24hL	304P72hK	304P72hL	304Pp118	304Pp126	304Pp14	306P12hL	306P24hK	306P24hL	306P72hK	306P72hL	306Pm14	306Pm42	306Pp100
Animal	001	001	001	001	001	001	001	001	001	039	039	039	039	039	039	245	245	245	245	245	245	245	245	245	245	245	245	248	248	248	248	248	248	304	304	304	304	304	304	304	304	306	306	306	306	306	306	306	306
Time point	12hL	24hL	72hL	-14	-42	+100	+118	+126	+14	12hC	24hC	72hC	-14	-42	+14	12hC	12hL	24hC	24hL	72hC	72hL	-14	-42	+100	+118	+126	+14	12hC	12hL	72hC	-14	-42	+100	12hL	24hC	24hL	72hC	72hL	+118	+126	+14	12hL	24hC	24hL	72hC	72hL	-14	-42	+100
Matrix	Rumen	Rumen	Rumen	Rumen	Rumen	Rumen	Rumen	Rumen	Rumen	Rumen	Rumen	Rumen	Rumen	Rumen	Rumen	Rumen	Rumen	Rumen	Rumen	Rumen	Rumen	Rumen	Rumen	Rumen	Rumen	Rumen	Rumen	Rumen	Rumen	Rumen	Rumen	Rumen	Rumen	Rumen	Rumen	Rumen	Rumen	Rumen	Rumen	Rumen	Rumen	Rumen	Rumen	Rumen	Rumen	Rumen	Rumen	Rumen	Rumen
NMR Metabolite (concentration (mM))
1,3-Dihydroxyacetone	0.01365	0.01595	0.04845	0.0704	0.0357	1.68615	0.022	0.47495	0.03645	0.02335	0.64845	0.0639	0.0257	0.03175	0.0674	0.01245	0.0099	0.02485	0.0287	0.01275	0.0298	0.02715	0.1233	0.01275	0.0233	0.0454	0.0367	0.9561	0.01875	0.07525	0.0229	0.0225	0.0233	0.04755	0.06645	0.8884	0.2732	0.0526	0.0541	0.1282	0.09645	0.01825	0.19955	0.03455	0.33075	0.0267	0.3732	0.06215	0.0386
2-Phenylpropionate	0.2469	0.1518	0.18	0.1211	0.0688	0.42875	0.27045	0.0832	0.16645	0.20735	0.25665	0.1774	0.06255	0.0647	0.0871	0.2214	0.1356	0.23495	0.306	0.2933	0.28295	0.04285	0.09375	0.32715	0.12015	0.2851	0.32485	0.1731	0.237	0.3101	0.1723	0.07325	0.26075	0.10925	0.13165	0.2241	0.27785	0.30365	0.2719	0.30245	0.3894	0.2898	0.15005	0.0826	0.1972	0.0924	0.15415	0.07265	0.272
3-Hydroxybutyrate	0.0496	0.1114	0.1329	0.09815	0.08035	0.60875	0.14685	0.32725	0.14865	0.11055	0.1063	0.14315	0.05665	0.04955	0.08325	0.0727	0.04855	0.1185	0.16515	0.11915	0.1442	0.0582	0.10065	0.20105	0.0924	0.11915	0.32605	0.07655	0.16355	0.25035	0.11475	0.0484	0.13605	0.1121	0.0847	0.14545	0.23935	0.19955	0.15825	0.32225	0.23935	0.10725	0.08035	0.0947	0.0496	0.0695	0.0913	0.01835	0.12095
3-Hydroxyphenylacetate	0.0537	0.0542	0.052	0.0253	0.02395	0.09895	0.0706	0.01665	0.04655	0.0652	0.308	0.16435	0.01605	0.0356	0.0752	0.0921	0.0468	0.09735	0.1301	0.06805	0.151	0.00775	0.07275	0.15985	0.0523	0.05645	0.09255	0.04935	0.03525	0.4801	0.0488	0.014	0.0311	0.07725	0.07905	0.1299	0.1665	0.17375	0.1698	0.1853	0.0887	0.0809	0.07405	0.0706	0.0272	0.04295	0.03475	0.02465	0.09435
3-Phenylpropionate	0.45795	0.66005	0.50465	0.62315	0.53725	0.6056	0.3698	0.22545	0.37355	0.5759	0.532	0.4436	0.6908	0.55155	0.49415	0.5955	0.43235	0.58605	0.79625	0.31305	0.5996	0.4892	0.57005	0.54845	0.425	0.4874	0.40425	0.4565	0.5187	0.4057	0.7296	0.46475	0.45625	0.6305	0.45365	0.4631	0.38465	0.5079	0.5642	0.40475	0.48925	0.4821	0.59305	0.5575	0.3524	0.4436	0.5072	0.46635	0.3857
4-Hydroxybutyrate	0.0868	0.02665	0.08885	0.03325	0.0351	0.64675	0.26065	0.37335	0.4328	0.13815	0.02455	0.11945	0.01125	0.01735	0.0419	0.3222	0.02245	0.16915	0.37225	0.30625	0.2761	0	0.07225	0.40625	0.0515	0.11915	1.1995	0.0119	0.0714	0.1953	0.0231	0.01505	0.2198	0	0.00775	0.34705	0.23935	0.19085	0.29225	0.4869	0.6358	0.11375	0	0.0281	0	0	0.3063	0.01345	0.1696
Acetate	56.2662	78.2591	71.6488	80.8829	68.9852	87.7609	69.561	86.9373	64.8284	84.2745	85.9164	84.4146	84.5547	89.1021	81.4771	90.7719	42.6358	83.9455	75.4753	63.0798	77.9698	66.9693	77.4386	67.4124	58.3015	77.7225	75.7186	71.6962	56.1598	109.987	99.9408	52.1525	62.7747	64.4023	66.9303	60.4092	87.552	92.5732	89.2193	98.6234	75.828	73.225	81.8657	83.4887	66.4948	71.9829	65.4018	51.7348	66.7348
Acetoacetate	0.02595	0.04595	0.03245	0.03345	0.02285	0.3937	0.09175	0.28635	0.15685	0.0654	0.0849	0.11745	0.0151	0.0342	0.0583	0.12945	0.0238	0.1668	0.18175	0.1745	0.1761	0.0122	0.05925	0.2537	0.0485	0.08455	0.4114	0.08155	0.04945	0.2234	0.01875	0.02285	0.14565	0.05775	0.07325	0.1432	0.24195	0.28075	0.18825	0.37825	0.3491	0.0512	0.13835	0.0663	0.13515	0.09045	0.1663	0.04075	0.1269
Acetone	0.32555	0.51335	0.4309	0.36575	0.22085	0.85185	0.50845	0.6522	0.7359	0.3242	0.36435	0.5517	0.24675	0.28465	0.28595	0.4481	0.1535	0.48945	0.5046	0.4612	0.5487	0.293	0.3297	0.6377	0.3875	0.57505	1.755	0.23315	0.4126	1.494	0.3144	0.162	0.69265	0.44105	0.2713	0.30215	0.70345	0.6375	0.50515	2.10955	1.6032	0.281	0.55385	0.429	0.5067	0.30245	0.2044	0.1417	0.41865
Adipate	2.16965	3.54585	4.19625	3.08955	2.2975	4.1321	3.2725	3.19815	3.2878	2.78595	3.1253	3.9581	2.7754	3.1093	3.0808	2.88765	1.0116	3.1094	4.56135	3.1311	3.48005	2.59095	3.15325	3.3879	2.4755	3.1229	3.63605	2.3163	2.02755	6.16175	3.63495	1.2803	2.7307	4.4671	2.4116	3.8939	3.0273	4.5444	3.2453	2.89705	3.26105	3.68885	2.63175	4.1307	3.2087	3.75085	2.2873	1.14515	2.98095
Alanine	0.32825	0.41135	0.38955	0.536	0.13065	1.05815	0.51675	0.6073	0.5457	0.31835	0.3679	0.5241	0.1633	0.1398	0.2762	0.5024	0.1359	0.429	0.84355	0.75225	0.8058	0.1592	0.1742	1.1064	0.375	0.4808	0.9213	0.263	0.245	1.107	0.2579	0.0855	0.50785	0.3471	0.25305	0.39035	0.27265	0.4878	0.43915	0.7977	1.0805	0.4084	0.14285	0.37255	0.28275	0.29395	0.24245	0.05045	0.41895
Allantoin	0.43295	0.1272	2.1019	2.6279	0.5003	0.7655	0.62615	0.16475	0.2741	0.763	2.94395	2.84745	0.90265	1.9274	2.37475	0.52185	0.2244	1.2003	0.2852	0.79995	0.6302	1.2499	3.94755	0.79	0.27715	0.77355	0.42905	0.189	0.3898	4.88315	0.45485	0.41065	0.3929	3.1184	2.15365	0.67015	10.6489	1.1462	0.84805	1.54205	0.6036	0.4395	14.9047	1.73695	5.8194	0.7132	0.2168	3.47215	0.8262
Aspartate	0.02855	0.04605	0.0479	0.05115	0.0406	2.30015	0.0398	0.44515	0.0393	0.03225	0.1347	0.1163	0.03865	0.04005	0.05005	0.17485	0.0191	0.02545	0.29705	0.07115	0.13405	0.0269	0.1812	0.0876	0.0542	0.055	0.08805	0.31915	0.0462	0.19275	0.0408	0.02805	0.03405	0.0617	0.03865	0.18025	0.1512	0.11835	0.13965	0.1451	0.22505	0.0318	0.19595	0.04275	0.14475	0.0356	0.51625	0.05835	0.0514
Benzoate	0.02615	0.02645	0.0303	0.04755	0.02655	0.021	0.019	0.0076	0.015	0.05465	0.11435	0.0177	0.0211	0.02435	0.0214	0.0382	0.01735	0.01635	0.0392	0.01505	0.04455	0.0157	0.02125	0.043	0.05305	0.0237	0.01215	0.01705	0.01765	0.1651	0.0195	0.01865	0.0156	0.04085	0.04865	0.0249	0.012	0.04375	0.08765	0.2251	0.02945	0.02935	0.03555	0.0448	0.0151	0.0098	0.02745	0.03425	0.044
Butyrate	8.7304	14.0953	17.0697	12.5338	9.1775	15.7443	13.4785	13.1485	13.248	10.9957	12.7316	14.982	11.7904	12.8562	13.427	11.503	4.41165	12.3968	18.9933	13.762	15.6289	10.8011	12.1242	13.7454	9.9434	12.8811	12.8231	9.7338	7.83405	23.6868	14.9444	5.0147	10.7122	17.7868	9.4256	16.179	11.533	19.3564	13.2856	12.2192	14.1028	16.5449	8.73755	16.5449	10.6265	16.6394	9.61885	4.2534	12.6166
Cadaverine	0.0393	0	0	0.01665	0.02415	0.06885	0	0.1731	0	0	0.0551	0	0	0.0114	0	0.24115	0.03295	0	0.3543	0.1247	0.35135	0	0.0369	0.4844	0	0.04735	0.3358	0.0196	0.0382	0	0.0422	0.01935	0	0	0	0.06805	0.07925	0	0.1049	0.1696	0.41565	0.06305	0	0	0	0	0.0912	0	0
Caffeine	0.0055	0.00605	0.0124	0.0202	0.01025	0.0317	0.01225	0.01185	0.008	0.0129	0.1135	0.0134	0.00795	0.01265	0.01685	0.0124	0.0081	0.0121	0.0321	0.0095	0.02535	0.00705	0.03855	0.00885	0.01135	0.0077	0.0213	0.03265	0.0085	0.0291	0.01615	0.01395	0.00545	0.0393	0.4095	0.06215	0.02535	0.04795	0.01305	0.0418	0.026	0.01915	0.07365	0.03195	0.03935	0.02535	0.0459	0.0102	0.0313
Carnitine	0.0042	0.00775	0.0107	0.01245	0.004	0.24195	0.017	0.0712	0.04655	0.0168	0.0387	0.0577	0.0035	0.0084	0.0088	0.0282	0.0024	0.0405	0.02995	0.12095	0.03185	0.0022	0.01085	0.048	0.01045	0.02005	0.28335	0.0542	0.0033	0.11305	0.00515	0.0037	0.0701	0.0161	0.0234	0.0546	0.05265	0.05095	0.0464	0.26395	0.1752	0.0058	0.016	0.01565	0.0483	0.015	0.03275	0.00665	0.02565
Choline	0.00725	0.00665	0.00885	0.01065	0.0066	0.18465	0.0143	0.0413	0.0083	0.01805	0.03505	0.02445	0.0052	0.00815	0.0131	0.02475	0.00445	0.0398	0.0279	0.01235	0.0288	0.00225	0.0209	0.0486	0.0036	0.00455	0.02405	0.0445	0.003	0.035	0.01095	0.00345	0.0046	0.0056	0.01665	0.0367	0.0314	0.02375	0.0555	0.0194	0.10185	0.0043	0.02795	0.00785	0.04065	0.00775	0.03155	0.0055	0.00705
Dimethylamine	0.00665	0.0202	0.02725	0.01425	0.0069	0.502	0.0279	0.0932	0.062	0.00665	0.0284	0.1021	0.00395	0.0123	0.0098	0.03835	0.00255	0.01255	0.0612	0.0484	0.04085	0.0264	0.04835	0.02415	0.0126	0.01905	0.067	0.08055	0.00935	0.07195	0.0069	0.0042	0.03335	0.03805	0.0145	0.04135	0.0709	0.07935	0.0452	0.0947	0.0653	0.0151	0.0365	0.03425	0.0376	0.00715	0.04875	0.0069	0.01015
Ethanol	0.24235	0.1528	0.10535	0.1226	0.0693	1.14145	0.20235	0.59965	0.1225	0.24305	0.2505	0.21475	0.02665	0.0497	0.0907	0.27555	0.04685	0.2776	0.3387	0.2446	0.31285	0.03975	0.14935	0.3884	0.08775	0.205	0.61185	0.1839	0.07785	0.37105	0.0638	0.03775	0.23185	0.13455	0.11465	0.26805	0.31985	0.4352	0.38175	0.5608	0.50175	0.20925	0.1658	0.1112	0.1272	0.1281	0.18955	0.0537	0.2891
Ferulate	0.0391	0.0255	0.0511	0.0838	0.03305	0.0579	0.05145	0.04545	0.0317	0.1658	0.56875	0.19505	0.0268	0.14115	0.08595	0.13745	0.02095	0.1485	0.1016	0.0955	0.15745	0.0259	0.1685	0.23005	0.02015	0.07665	0.0583	0.02565	0.0325	0.66695	0.03155	0.0201	0.01615	0.076	0.11015	0.1502	0.0544	0.2272	0.2118	0.3516	0.1465	0.059	0.1904	0.06025	0.0339	0.02455	0.0575	0.0379	0.1102
Formate	0.28025	0.22605	0.23535	0.1948	0.24805	0.23405	0.27435	0.01425	0.78135	0.30025	0.23955	0.26315	0.2281	0.2539	0.22755	0.252	0.1942	0.202	0.22395	0.1791	0.16095	0.19985	0.47975	0.1974	0.17645	0.1472	1.62045	0.1895	0.1986	0.2013	0.24805	0.1656	0.1351	0.143	0.1887	0.2284	0.14435	0.1989	0.17655	0.1807	0.1191	0.19215	0.2562	0.13305	0.15215	0.1685	0.20695	0.21355	0.20685
Fumarate	0.04765	0.00935	0.15875	0.22145	0.0542	0.05535	0.04645	0.02975	0.01675	0.059	0.29975	0.20475	0.0612	0.15755	0.18485	0.0399	0.008	0.06345	0.03235	0.0446	0.0531	0.06775	0.37545	0.0712	0.00865	0.049	0.0156	0.01055	0.01175	0.52045	0.0102	0.00685	0.0064	0.2622	0.1742	0.0584	0.37655	0.0921	0.0597	0.1423	0.04905	0.0365	1.25305	0.1476	0.0295	0.01005	0.0319	0.29205	0.0498
Glucose	0.07085	0.1158	0.1017	0.0758	0.0811	2.87935	0.1604	1.83825	0.36515	0.2254	0.903	0.67845	0.06	0.10495	0.19395	0.45575	0.2285	0.9829	0.7263	2.7908	0.68995	0.02895	0.28965	0.79395	0.134	0.3107	2.4511	1.14015	0.0481	2.9327	0.06185	0.0233	0.9492	0.1872	0.21405	0.7571	0.8674	0.71885	1.23925	4.99325	3.5301	0.14365	0.3399	0.20005	0.20355	0.14095	0.56335	0.07015	0.4541
Glutamate	0.29765	0.24185	0.0535	0.0303	0.1167	0.57555	0.19155	0.60895	0.30265	0.3739	0.1266	0.111	0.0719	0.0476	0.0538	0.3696	0.06465	0.41555	0.3486	0.29135	0.29945	0.0468	0.15925	0.3436	0.1858	0.3141	0.76265	0.2018	0.14635	0.50515	0.0625	0.044	0.281	0.04065	0.05845	0.2959	0.0677	0.25795	0.4646	0.68245	1.12615	0.25065	0.06565	0.1455	0.08335	0.05465	0.3817	0.0877	0.41515
Glycerol	0.11165	0.0351	0.037	0.04365	0.04405	2.6493	0.0853	0.7159	0.05735	0.18695	0.37875	0.08835	0.02025	0.0345	0.0453	0.3708	0.03925	0.49485	0.4111	0.40195	0.3047	0.0161	0.1072	0.40165	0.05215	0.10775	0.7477	0.6783	0.0412	0.17555	0.0339	0.01275	0.1325	0.0498	0.03955	1.1662	0.4191	0.22105	0.3713	0.32665	0.93905	0.13095	0.19235	0.0362	0.0708	0.0531	0.55225	0.0475	0.166
Glycine	0.0783	0.0357	0.0515	0.15915	0.038	1.58745	0.1335	0.36545	0.11275	0.09595	0.4254	0.1364	0.03395	0.03155	0.07485	0.16605	0.0208	0.31835	0.28455	0.3861	0.2708	0.0346	0.0984	0.448	0.04105	0.0665	0.96825	0.643	0.0493	0.89635	0.0364	0.0335	0.1993	0.06405	0.0616	0.60785	0.3076	0.17455	0.20335	0.72455	0.6796	0.062	0.18365	0.03785	0.22805	0.0449	0.26	0.04975	0.0834
Histidine	0.0435	0.04485	0.05475	0.06525	0.0471	0.04825	0.0452	0.01595	0.0344	0.0643	0.13045	0.08785	0.04015	0.0514	0.0597	0.0463	0.0305	0.09625	0.049	0.08615	0.0585	0.03185	0.2025	0.083	0.02775	0.04925	0.1005	0.0465	0.05015	0.30735	0.0407	0.03535	0.03515	0.06825	0.0948	0.08645	0.05365	0.12525	0.1029	0.2572	0.1051	0.0339	0.18035	0.05245	0.0409	0.02515	0.06665	0.08015	0.0719
Hypoxanthine	0.0701	0.0569	0.07925	0.0461	0.0599	0.14975	0.055	0.0123	0.1004	0.07785	0.1247	0.1759	0.02055	0.03195	0.0777	0.0871	0.01785	0.1654	0.051	0.19905	0.0884	0.012	0.24165	0.093	0.0492	0.06635	0.3052	0.06905	0.04505	0.5486	0.0555	0.01335	0.12125	0.05825	0.0926	0.1371	0.13295	0.2327	0.15175	0.31015	0.1811	0.0449	0.1026	0.0689	0.10335	0.09185	0.04815	0.04605	0.11515
Imidazole	0.3493	0.32025	0.31655	0.26325	0.33695	0.3912	0.37675	0.02035	0.50085	0.3758	0.3034	0.3789	0.3087	0.31	0.2883	0.3191	0.2807	0.34125	0.2953	0.39575	0.2209	0.24465	0.64775	0.25275	0.227	0.18665	0.50585	0.21885	0.3054	0.81625	0.3315	0.2106	0.2735	0.19635	0.23065	0.2825	0.3125	0.45065	0.29385	0.56325	0.38295	0.24455	0.2933	0.1845	0.22895	0.24695	0.26405	0.2654	0.265
Isobutyrate	1.31575	1.1439	0.9571	0.93575	0.9922	5.7196	0.9188	1.799	0.7246	1.48695	1.1892	1.03155	0.94005	0.8672	1.24315	1.43975	0.77175	1.466	1.3329	0.7199	1.1829	0.8776	1.17215	1.28735	0.82645	1.2195	1.91265	1.23755	1.39555	1.72225	1.23555	0.86685	0.88675	0.76645	1.0437	1.01915	1.39765	1.012	1.7049	1.78115	7.33855	1.09705	1.7489	0.81575	1.2289	0.76205	1.3342	0.9101	1.1409
Isoleucine	0.25675	0.1978	0.18595	0.15415	0.08005	1.6838	0.2622	1.19495	0.25395	0.3711	0.5994	0.49935	0.04065	0.0681	0.1286	0.72775	0.05275	0.79375	0.85375	0.57395	0.64495	0.0469	0.1361	0.7393	0.0935	0.2762	1.6691	0.50075	0.0723	0.84555	0.07615	0.04435	0.45885	0.20765	0.20055	0.6637	0.4672	0.6418	0.74285	0.96695	1.31075	0.30665	0.1848	0.1648	0.09895	0.16095	0.4929	0.09405	0.38955
Isopropanol	0.08475	0.0845	0.1701	0.1167	0.0604	0.37035	0.08905	0.35015	0.13905	0.0882	0.10485	0.1368	0.0527	0.0597	0.06725	0.12795	0.04755	0.1136	0.14715	0.12515	0.13565	0.0798	0.10125	0.1601	0.0894	0.08595	0.29935	0.07045	0.1135	0.2259	0.0932	0.0441	0.04755	0.2054	0.08445	0.11155	0.14955	0.15975	0.1267	0.2311	0.2054	0.0628	0.09315	0.10855	0.10495	0.07295	0.0681	0.0223	0.09595
Isovalerate	0.7431	0.6859	0.5911	0.78175	0.60195	1.3294	0.6383	1.0747	0.5411	0.88075	0.861	1.00965	0.5924	0.55415	0.69955	1.03205	0.37	1.06805	0.75555	0.62295	0.63795	0.69015	0.672	0.8355	0.52565	0.7079	1.4079	0.5807	0.7733	1.3517	0.8	0.4133	0.6832	0.47215	0.70635	0.66245	0.7066	0.9766	0.95995	1.3827	1.0564	0.6681	0.7522	0.54355	0	0.3926	0.60695	0.38995	0.69145
Lactate	0.2148	0.20385	0.41975	0.5321	0.25445	1.35825	2.47045	0.88265	0.1746	0.16485	0.6375	0.62585	0.15205	0.3443	0.3317	0.10205	0.18765	0.2145	3.3853	2.25265	2.78755	0.1602	0.4475	7.9806	0.2171	0.27815	0.50495	0.4435	0.3103	0.9283	0.19365	0.13005	0.20435	0.40295	0.3629	0.80595	0.65395	0.5196	0.2684	0.70005	7.24375	0.1392	0.53925	0.32605	3.23785	0.2839	0.33355	0.0973	0.3154
Leucine	0.20935	0.2528	0.2044	0.2468	0.13085	0.0903	0.3339	0.4147	0.33745	0.23195	0.0506	0.2865	0.01615	0.0231	0.0502	0.2753	0.0847	0.28895	0.38205	0.336	0.3503	0.0118	0.02985	0.55265	0.13315	0.26885	0.5825	0.07735	0.16245	0.2934	0.0843	0.03215	0.30905	0.15075	0.0766	0.26305	0.1547	0.4066	0.30935	0.51545	0.54685	0.2083	0.0614	0.20775	0.0316	0	0.15605	0.02315	0.2779
Lysine	0.0833	0	0.10055	0	0.05755	0.26095	0.2515	0.34305	0.1944	0.1032	0.17545	0	0.04845	0.03725	0	0.47665	0.06635	0	0.6996	0.3167	0.69605	0.01655	0.16235	0.9578	0	0.11995	0.8534	0.07695	0.0897	0	0.05955	0.03545	0	0	0	0.17645	0.14965	0.0417	0.21115	0.49535	0.81815	0.1615	0	0	0	0	0.1817	0.049	0.1157
Maltose	0.077	0.0219	0.05545	0.0436	0.046	0.7922	0.09485	0.113	0.1613	0.234	0.58965	0.09305	0.01955	0.0478	0.0334	0.49395	0.0171	0.926	0.2982	0.58065	0.4331	0.014	0.11185	0.5196	0.0772	0.1827	1.1181	0.58585	0.05105	0.204	0.02705	0.0184	0.2157	0.04495	0.10655	0.63955	0.3	0.2668	0.4571	0.31505	0.69565	0.12305	0.2765	0.0297	0.0822	0.02145	0.1375	0.04045	0.2419
Methanol	0.0082	0.00995	0.017	0.02805	0.01455	0.6999	0.02005	0.18145	0.0403	0.0194	0.18655	0.03845	0.00915	0.0134	0.01975	0.02575	0.0115	0.0447	0.0513	0.09305	0.0221	0.01	0.05285	0.03825	0.0179	0.02295	0.2558	0.3201	0.01305	0.2609	0.0232	0.0199	0.0678	0.0214	0.02495	0.2818	0.12065	0.0616	0.0406	0.24205	0.18225	0.00715	0.12915	0.01665	0.0857	0.0163	0.14355	0.0195	0.0274
Methylamine	0.0113	0.22175	0.13435	0.0899	0.0278	1.0821	0.3292	0.5165	0.29535	0.033	0.2574	0.4597	0.03355	0.03885	0.01995	0.33515	0.0083	0.2082	0.53705	0.3902	0.27355	0.14295	0.20695	0.3071	0.086	0.2819	0.17495	0.745	0.0131	0.6746	0.022	0.0131	0.28245	0.3626	0.06065	0.2074	0.25405	0.4658	0.1502	0.5649	0.52175	0.1433	0.2273	0.27	0.18975	0.10715	0.0917	0.0208	0.17085
Nicotinate	0.03015	0.0208	0.0248	0.0225	0.02195	0.04555	0.0204	0.0053	0.04065	0.0212	0.0304	0.0401	0.0137	0.0192	0.0322	0.01925	0.0148	0.03505	0.01475	0.052	0.0255	0.01145	0.06485	0.0206	0.02645	0.02495	0.06335	0.0273	0.01405	0.11445	0.01705	0.0106	0.0288	0.0201	0.0232	0.03895	0.04535	0.04295	0.0327	0.0471	0.0382	0.0207	0.0514	0.0194	0.0172	0.0266	0.0314	0.02035	0.02935
N-nitrosodimethylamine	0.07655	0.0543	0.0597	0.05075	0.0289	0.8744	0.0925	0.50855	0.2544	0.0989	0.1385	0.0965	0.0145	0.04025	0.08885	0.1133	0.01585	0.0935	0.2132	0.1192	0.24685	0.0183	0.05275	0.30815	0.05405	0.1427	0.52145	0.2312	0.02885	0.2198	0.0349	0.0107	0.34115	0.0669	0.1551	0.38225	0.30775	0.43845	0.41805	0.74685	0.36545	0.10335	0.13885	0.0846	0.1668	0.099	0.2812	0.05275	0.2181
N-Phenylacetylglycine	0.08845	0.04745	0.0703	0.04185	0.03465	0.0361	0.09095	0.01835	0.04985	0.05935	0.32455	0.1057	0.01525	0.0257	0.0442	0.0963	0.02265	0.05705	0.11725	0.09115	0.1399	0.01425	0.0617	0.23465	0.03685	0.0804	0.1245	0.04505	0.02975	0.4762	0.0254	0.01685	0.0334	0.0533	0.07235	0.0729	0.05785	0.14715	0.1166	0.20245	0.19815	0.06705	0.12095	0.0721	0.05125	0.01635	0.02915	0.03275	0.078
Ornithine	0.05695	0.07605	0.11715	0.09495	0.0459	0.62155	0.1483	0.4432	0.209	0.0506	0.20735	0.1578	0.0326	0.04285	0.0853	0.14585	0.02445	0.1073	0.21415	0.17385	0.2781	0.03505	0.1114	0.3682	0.2781	0.1529	0.49605	0.15885	0.05805	0.30965	0.0425	0.0224	0.13385	0.07775	0.0536	0.2977	0.2461	0.17675	0.10535	0.55325	0.30735	0.0419	0.18955	0.10445	0	0.0683	0.2143	0.0437	0.1059
Phenylacetate	0.23035	0.1254	0.10695	0.1401	0.0709	0.48185	0.13095	0.1532	0.1397	0.236	0.4867	0.16145	0.03465	0.0458	0.136	0.33195	0.0834	0.24865	0.28225	0.35175	0.2654	0.1289	0.15755	0.43845	0.09705	0.1442	0.40545	0.3875	0.196	0.66055	0.0658	0.10175	0.2352	0.11885	0.12265	0.41755	0.25305	0.1921	0.2452	0.59915	0.4588	0.18295	0.19035	0.0889	0.1227	0.0356	0.2772	0.11855	0.12005
Phenylalanine	0.05215	0.03395	0.0532	0.0405	0.0412	0.03345	0.08025	0.0147	0.05065	0.05645	0.1708	0.03535	0.0502	0.03515	0.0599	0.0777	0.02045	0.05715	0.0929	0.06155	0.1101	0.0491	0.0895	0.19035	0.022	0.0536	0.12305	0.0313	0.04245	0.1463	0.0335	0.0198	0.0482	0.1202	0.1066	0.05605	0.0496	0.1199	0.09335	0.1678	0.16185	0.04335	0.13745	0.08605	0.0572	0.0284	0.0128	0.0382	0.06165
Pimelate	1.8193	2.62445	3.67445	2.0963	1.02485	1.9368	4.27105	3.17455	3.7564	1.94695	2.54995	3.35645	1.78975	1.4861	1.47515	2.3184	0.8783	2.8907	3.80955	2.1509	3.71135	2.3647	1.7051	4.93635	3.46865	3.0162	5.2981	1.82	2.54065	3.90835	2.08165	0.5326	4.24395	3.87285	2.21995	3.4177	2.4393	3.2874	2.7744	3.19035	3.8339	3.2629	0	3.27205	0	2.68925	1.4183	0.41085	2.87335
Proline	0.025	0.03845	0.0818	0.0856	0.04995	1.19175	0.0383	0.99725	0.0374	0.07295	0.37125	0.0678	0.0502	0.11025	0.08415	0.1132	0.0271	0.07655	0.27635	0.0765	0.14785	0.0318	0.17935	0.02685	0.04325	0.0385	0.0622	0.42655	0.0446	0.1374	0.03945	0.0318	0.038	0.10475	0.2082	0.78795	0.31345	0.30775	0.0668	0.1982	0.6632	0.0822	0.10825	0.1797	0.34265	0.1551	0.9034	0.04775	0.1284
Propionate	21.3503	27.9019	25.005	24.1338	15.4244	47.6446	39.4235	43.5496	47.7901	18.8803	20.0249	24.7195	18.6214	22.3789	17.6261	24.578	13.3445	25.2336	28.9932	19.3364	35.7807	20.018	21.9675	34.6067	32.5806	40.0234	48.8165	16.4153	24.6931	30.6777	22.9932	11.9931	38.9322	26.635	19.7633	23.4222	27.802	37.2723	34.657	58.793	42.6626	21.4175	28.2559	26.6041	22.9864	24.5354	14.422	11.7135	32.8127
Ribose	0.11645	0.1397	0.18915	0.1128	0.1313	1.73905	0.15765	0.53845	0.21565	0.2079	1.06425	0.1823	0.05975	0.12565	0.20355	0.11495	0.08415	0.36695	1.24345	0.8379	0.49475	0.05285	0.33535	0.5742	0.1005	0.21485	0.85205	1.71895	0.10055	1.0669	0.1443	0.0675	0.38855	0.1967	0.0893	0.34145	0.70595	0.5223	0.2921	0.9224	3.8229	0.1581	0.27475	0.2224	0.29525	0.13835	1.0929	0.11365	0.36085
Serine	0.09485	0.11175	0.13465	0.1868	0.08215	1.7796	0.0615	1.2783	0.1028	0.1583	1.42205	0.2852	0.08775	0.20245	0.1713	0.24145	0.0827	0.35245	0.3696	0.1652	0.15515	0.07725	0.3426	0.27275	0.1211	0.13245	0.8031	1.33845	0.13965	0.50635	0.1183	0.0865	0.19085	0.15665	0.2021	2.08325	1.10605	0.2737	0.21095	0.28605	0.9835	0.113	0.6762	0.14425	0.68915	0.1261	1.1125	0.2054	0.1766
Succinate	0.098	0.0864	0.06485	0.0651	0.0763	0.4171	0.1233	0.1368	0.1241	0.1112	0.07515	0.07845	0.0769	0.05635	0.0682	0.10585	0.0451	0.1085	0.0976	0.04475	0.1343	0.05775	0.08145	0.08275	0.1189	0.08985	0.077	0.07485	0.09095	0.0688	0.0855	0.05335	0.17145	0.05545	0.06765	0.0744	0.0708	0.0755	0.1271	0.33655	3.1666	0.0806	0.10185	0.05135	0.06615	0.0486	0.0971	0.05175	0.12775
Trimethylamine	0.07045	0.0985	0.08825	0.0834	0.0817	0.6182	0.3131	0.1661	0.5251	0.08775	0.123	0.29905	0.0947	0.07565	0.07095	0.2106	0.06115	0.1623	0.33865	0.3908	0.2455	0.0661	0.08135	0.5858	0.0586	0.0711	1.2525	0.1073	0.07365	0.73075	0.10215	0.067	0.3001	0.2058	0.0636	0.0904	0.4251	0.2613	0.29715	1.17095	0.866	0.07065	0.0852	0.17125	0.22355	0.06095	0.09725	0.0654	0.054
Tyrosine	0.08185	0.0318	0.1145	0.1296	0.06545	0.0613	0.0984	0.02525	0.074	0.12225	0.3398	0.1823	0.04865	0.1122	0.0999	0.13245	0.023	0.1035	0.14015	0.09445	0.13775	0.05315	0.2361	0.2083	0.0231	0.07475	0.2111	0.0362	0.05235	0.4264	0.04845	0.01665	0.0511	0.149	0.16965	0.1149	0.03475	0.1565	0.13095	0.21885	0.1776	0.07755	0.55485	0.09605	0.04565	0.01905	0.04085	0.1007	0.0819
Uracil	0.08995	0.05015	0.15575	0.18865	0.08325	0.15815	0.0949	0.03125	0.1408	0.12355	0.4367	0.2664	0.03875	0.12075	0.16845	0.1327	0.0508	0.2336	0.1213	0.28605	0.18235	0.0438	0.39645	0.24035	0.0774	0.12235	0.55425	0.08595	0.05805	1.01665	0.04745	0.0352	0.2081	0.2429	0.2006	0.18755	0.1577	0.3334	0.2383	0.61255	0.35425	0.07	0.64645	0.22245	0.1288	0.08465	0.11295	0.20845	0.19955
Urea	1.26065	0.7443	6.53865	8.25375	1.5454	2.13285	1.97375	0.2326	1.2505	1.85155	9.573	7.5377	2.7174	6.3084	7.42105	1.15875	1.03215	3.0573	0.81765	2.5272	1.8671	3.57005	12.038	2.23905	1.0235	1.95425	3.06745	0.83925	1.3556	13.3955	1.4801	1.3254	1.96935	9.4346	6.5656	2.4726	27.4689	2.8949	1.94825	4.7455	2.18145	1.4545	43.9044	6.25065	15.9583	2.3599	0.66025	11.297	2.39425
Valerate	2.3025	3.30095	4.26195	2.60655	1.24055	3.649	5.6187	4.15415	5.21285	2.37555	3.0821	4.0015	2.05905	1.82545	1.7501	2.7991	1.09235	3.5019	5.02365	2.74645	4.88405	2.74555	2.0953	6.0634	4.7773	4.01245	8.4856	2.20575	3.2642	5.02965	2.5153	0.6735	6.31635	4.7783	2.57745	4.0927	3.12325	4.31655	3.4599	4.7258	4.5765	4.1167	0.1284	4.2804	2.44415	3.33025	1.683	0.5116	3.78895
Valine	0.18405	0.0543	0.1785	0.16225	0.06345	0.9395	0.42065	0.7257	0.5572	0.2956	0.3197	0.2278	0.03955	0.0876	0.1257	0.44925	0.05175	0.4124	0.5501	0.45115	0.48155	0.03355	0.25695	0.7411	0.09095	0.2139	0.99465	0.2461	0.0876	0.35445	0.0611	0.03595	0.38185	0.1012	0.25815	0.38335	0.2227	0.34955	0.5226	0.6737	0.7941	0.20665	0.0866	0.0604	0.15315	0.03065	0.22275	0.0834	0.27985
Xanthine	0.05235	0.05505	0.056	0.0603	0.04775	0.1014	0.0484	0.0165	0.07755	0.089	0.13185	0.08045	0.0406	0.05285	0.0534	0.0469	0.0401	0.08925	0.0489	0.13425	0.05855	0.03865	0.26055	0.08085	0.11205	0.0451	0.2247	0.04135	0.0515	0.21385	0.061	0.0363	0.10115	0.0628	0.06995	0.0969	0.09455	0.1222	0.10365	0.28895	0.0632	0.0605	0.12485	0.05665	0.0859	0.05325	0.07515	0.08035	0.09365
[truncated: 101 more columns]

## Sheet: Average concentrations
Supplementary Data 4
NMR metabolite data
Average concentrations (mM) of 60 NMR derived metabolites in rumen and duodenal fluid samples.
Metabolites (N=60)	1,3-Dihydroxyacetone	2-Phenylpropionate	3-Hydroxybutyrate	3-Hydroxyphenylacetate	3-Phenylpropionate	4-Hydroxybutyrate	Acetate	Acetoacetate	Acetone	Adipate	Alanine	Allantoin	Aspartate	Benzoate	Butyrate	Cadaverine	Caffeine	Carnitine	Choline	Dimethylamine	Ethanol	Ferulate	Formate	Fumarate	Glucose	Glutamate	Glycerol	Glycine	Histidine	Hypoxanthine	Imidazole	Isobutyrate	Isoleucine	Isopropanol	Isovalerate	Lactate	Leucine	Lysine	Maltose	Methanol	Methylamine	Nicotinate	N-nitrosodimethylamine	N-Phenylacetylglycine	Ornithine	Phenylacetate	Phenylalanine	Pimelate	Proline
Average concentrations in Rumen and Duodenum (N=138)	0.137989	0.295905	0.292644	0.130642	0.501931	0.265609	37.6948	0.188126	0.287808	1.72767	0.517383	2.60791	1.09851	0.16691	6.45757	0.343099	0.0548519	0.0658757	0.0386315	0.82421	0.306753	0.160435	0.282971	0.157607	0.712946	0.805708	0.349999	1.00976	0.209939	0.18413	0.303218	0.866616	0.415243	0.172844	0.776327	0.605977	0.439144	0.432857	0.354152	0.105116	0.389321	0.224512	0.2493	0.154662	0.438465	0.385458	0.26315	1.48353	0.501541
Rumen (RUM) total average (N=71)	0.12923	0.192627	0.12956	0.092919	0.493501	0.164695	74.0054	0.12932	0.488129	3.02291	0.420891	1.85422	0.144394	0.0411972	12.3977	0.0576	0.0315979	0.0451394	0.0223077	0.0422063	0.211979	0.114754	0.237121	0.126422	0.6955	0.250286	0.241175	0.221181	0.0781789	0.118418	0.320549	1.31369	0.397828	0.114944	0.74013	0.773744	0.208837	0.152245	0.208004	0.0740824	0.249352	0.0328831	0.191511	0.0818246	0.154506	0.212373	0.0698592	2.58816	0.213625
-42	0.0521714	0.0764929	0.0614786	0.0380429	0.5167	0.0281786	70.1137	0.0369429	0.220207	2.24509	0.130414	1.8566	0.0700429	0.04175	9.11482	0.02	0.0167071	0.00664286	0.0102643	0.01485	0.07505	0.0715357	0.253307	0.156064	0.123043	0.0914214	0.0497214	0.0544071	0.0850643	0.0766786	0.335021	0.998107	0.0909786	0.06085	0.572664	0.251136	0.0499	0.0697857	0.0531429	0.0234429	0.0571643	0.0260714	0.0348214	0.0376643	0.0529857	0.122557	0.0509	1.14358	0.0782429
-14	0.118883	0.113942	0.0838083	0.0262583	0.584725	0.1137	74.8258	0.0614333	0.263508	2.69129	0.2567	0.93795	0.173192	0.025475	11.1996	0.0435417	0.0218667	0.013375	0.0141667	0.0223083	0.0989417	0.04095	0.215792	0.0673417	0.154975	0.150892	0.182183	0.121542	0.0501333	0.0340917	0.28215	1.0741	0.197392	0.077525	0.669333	0.275208	0.111275	0.086675	0.0621583	0.0530167	0.074675	0.0188833	0.107133	0.0225917	0.0960333	0.145233	0.0316833	1.82311	0.312092
12hC	0.283687	0.219913	0.102238	0.0794125	0.58715	0.180375	92.8854	0.106225	0.380663	2.84472	0.413137	0.665013	0.1748	0.0366375	11.7329	0.0651875	0.0217375	0.046525	0.0303125	0.0384125	0.2636	0.13825	0.253287	0.0451125	0.969888	0.344738	0.403775	0.320462	0.0759875	0.112775	0.34825	1.50778	0.586088	0.1046	0.987725	0.318525	0.227788	0.202025	0.418038	0.1136	0.39915	0.0332875	0.165388	0.0837125	0.115712	0.385137	0.0627125	2.28029	0.190438
24hC	0.201058	0.2052	0.119608	0.129075	0.519008	0.0748	80.994	0.163233	0.421208	2.85997	0.344433	4.42407	0.132675	0.04545	11.6335	0.016925	0.123075	0.0446	0.033425	0.03415	0.21975	0.254383	0.286008	0.400767	0.695117	0.245558	0.237342	0.259317	0.120508	0.198808	0.355383	1.47582	0.4219	0.101733	0.950675	0.4988	0.124658	0.0879583	0.366467	0.0904417	0.1839	0.0545417	0.153533	0.123075	0.163617	0.264433	0.105183	2.0524	0.300458
72hC	0.11915	0.226507	0.142129	0.148714	0.387371	0.157279	75.8701	0.1726	0.627657	3.57814	0.530529	3.86896	0.113529	0.03755	13.867	0.0442143	0.0243929	0.0680286	0.0253214	0.0515929	0.223107	0.177036	0.182679	0.1905	1.28464	0.200093	0.205543	0.318693	0.0946143	0.192664	0.368707	1.11135	0.461236	0.132093	0.717964	1.26754	0.21645	0.0976714	0.2258	0.0953214	0.325279	0.0468071	0.173393	0.130336	0.148636	0.2694	0.0629214	2.28409	0.175193
+14	0.05771	0.2499	0.19141	0.10127	0.44362	0.49223	75.6397	0.23985	1.06538	3.36256	0.70461	1.09765	0.094	0.03443	13.516	0.15029	0.02297	0.11995	0.03546	0.0518	0.29772	0.12346	0.57837	0.08767	1.4467	0.48447	0.37866	0.43602	0.09229	0.17066	0.41163	2.43878	0.73432	0.18517	0.89675	1.75134	0.37009	0.37319	0.4321	0.11758	0.28656	0.04387	0.31789	0.12096	0.26648	0.28083	0.10448	3.90535	0.21866
+100	0.3583	0.28879	0.23501	0.099	0.49047	0.30556	71.9778	0.20789	0.60623	3.14025	0.67715	0.77075	0.50941	0.03048	12.6827	0.11065	0.01836	0.08883	0.05254	0.11853	0.43396	0.10859	0.20022	0.05311	1.11546	0.38485	0.68609	0.49206	0.06277	0.12935	0.30811	1.99062	0.71017	0.15609	0.84952	2.05838	0.31165	0.26689	0.36266	0.17387	0.44323	0.0351	0.41166	0.09214	0.27542	0.28886	0.08049	3.21644	0.29002
12hL	0.0301429	0.199893	0.0973143	0.0744	0.489864	0.0686571	58.9418	0.0608429	0.307879	2.69604	0.305914	3.25455	0.0454857	0.0253286	11.3046	0.0293286	0.0205286	0.0127643	0.00694286	0.0232357	0.136871	0.0507857	0.203786	0.120614	0.183757	0.158807	0.0733357	0.05905	0.0470429	0.0568857	0.27115	1.04887	0.178229	0.0935143	0.618443	0.260457	0.159407	0.0885286	0.0725286	0.0152857	0.159893	0.0242071	0.08795	0.0496214	0.0526786	0.1631	0.0526429	2.53537	0.09155
24hL	0.170675	0.177392	0.122058	0.097575	0.582008	0.146133	73.7002	0.113517	0.42915	3.91561	0.482475	0.847558	0.110058	0.0394833	16.0974	0.0703917	0.034125	0.0280667	0.016	0.040875	0.184817	0.0893667	0.192417	0.0758667	0.419333	0.263083	0.294958	0.1817	0.0686	0.0864833	0.251967	1.08271	0.386975	0.112933	0.6791	0.8947	0.273142	0.17805	0.188383	0.0679167	0.386442	0.023725	0.178042	0.078425	0.144033	0.190783	0.0759667	3.26598	0.24945
72hL	0.0391167	0.191142	0.128558	0.0937667	0.489958	0.117067	73.6748	0.11305	0.405717	3.47093	0.42585	1.15664	0.0743583	0.0421667	15.004	0.062725	0.024775	0.0211167	0.0186	0.02825	0.19545	0.0944667	0.197383	0.0928	0.320175	0.15635	0.12245	0.11055	0.0616833	0.140692	0.339667	0.997908	0.313283	0.115975	0.632767	0.782933	0.222883	0.163058	0.155825	0.0274667	0.169375	0.0312917	0.162533	0.07665	0.12865	0.120933	0.0721667	2.80883	0.150608
+118	0.0922583	0.210042	0.1218	0.145142	0.457792	0.223383	69.5314	0.120042	0.463392	2.62418	0.42945	1.07502	0.188858	0.07575	10.854	0.0529667	0.020225	0.0379	0.022925	0.05195	0.2138	0.1276	0.196225	0.0985333	0.563308	0.308783	0.252442	0.202958	0.0950167	0.106517	0.321292	1.23989	0.4063	0.0993917	0.657642	0.755142	0.262825	0.14705	0.182625	0.0669167	0.236342	0.028725	0.259475	0.0969583	0.216358	0.200433	0.0797083	3.26664	0.249942
+126	0.136392	0.199483	0.182708	0.0832083	0.410175	0.192267	78.9861	0.199633	0.798067	2.95445	0.486742	1.02321	0.142917	0.0585917	12.2626	0.0650083	0.0290083	0.0820833	0.0157	0.0497333	0.302658	0.116367	0.154025	0.06825	1.43878	0.357417	0.224692	0.250025	0.0847917	0.128892	0.273392	1.2938	0.535133	0.1643	0.827725	0.486417	0.259758	0.172042	0.154875	0.0958833	0.39295	0.0306833	0.341758	0.083275	0.254217	0.2122	0.0718	2.99772	0.312
Duodenum (DUO) total average (N=67)	0.146748	0.399182	0.455728	0.168366	0.510361	0.366524	1.38414	0.246931	0.0874881	0.432437	0.613875	3.3616	2.05263	0.292622	0.517437	0.628597	0.078106	0.0866119	0.0549552	1.60621	0.401527	0.206116	0.328821	0.188793	0.730393	1.36113	0.458822	1.79833	0.3417	0.249842	0.285888	0.419545	0.432658	0.230743	0.812525	0.43821	0.669451	0.713469	0.5003	0.136149	0.52929	0.41614	0.307088	0.227499	0.722424	0.558543	0.456442	0.378901	0.789457
-42	0.311933	0.458	0.450883	0.403067	0.714483	0.730417	0.717267	0.338217	0.1408	0.6201	0.564617	1.44318	2.79892	0.585217	0.58755	0.866133	0.187867	0.1065	0.0945	1.17052	0.507067	0.370283	0.525267	0.1683	0.373267	2.09923	1.03273	0.695817	0.628067	0.460633	0.543267	0.25555	0.445567	0.2709	0.611967	0.4024	0.598817	1.16225	0.117	0.254783	0.453917	1.0674	0.447433	0.47285	1.0198	0.677367	0.665833	0.4903	2.27985
-14	0.0296333	0.25675	0.27365	0.0189167	0.232517	0.0597	0.235167	0.0402833	0.0231833	0.1847	0.299967	1.31305	0.905717	0.0140833	0.1338	0.5596	0.0115333	0.0331167	0.0206833	1.53433	0.18115	0.06265	0.03515	0.0304167	0.08355	0.72275	0.0822	0.28335	0.0521	0.0188833	0.0525833	0.115733	0.19115	0.142967	0.591917	0.2312	0.43865	0.467617	0.0577333	0.0388833	0.202667	0.0265333	0.148633	0.0682333	0.495317	0.25655	0.20885	0.12695	0.0682833
12hC	0.05488	0.33584	0.22544	0.03042	0.22058	0.0965	0.32206	0.06682	0.01626	0.21864	0.4527	3.86462	0.94572	0.05684	0.1321	0.55058	0.01758	0.04008	0.01838	1.4496	0.20716	0.08412	0.07922	0.1679	0.11614	0.66898	0.10944	0.67342	0.07438	0.0455	0.1053	0.14182	0.22656	0.14294	0.65466	0.20314	0.54568	0.4261	0.14378	0.0666	0.53492	0.02746	0.12128	0.1043	0.3665	0.42942	0.22872	0.1509	0.05984
24hC	0.0962143	0.188729	0.316843	0.0900429	0.225671	0.219257	0.577971	0.1601	0.0534286	0.319514	0.6451	1.63009	1.4675	0.0338	0.287843	0.405871	0.0241714	0.0804571	0.0403571	1.30114	0.429157	0.0850143	0.109986	0.0377857	0.427414	0.8324	0.317	0.883386	0.0685429	0.0304714	0.0487143	0.273714	0.454629	0.146814	0.550829	0.309286	0.695329	0.580386	0.336286	0.105357	0.2122	0.0445	0.261871	0.133314	0.469629	0.307843	0.149614	0.240886	0.326486
72hC	0.04294	0.2386	0.18172	0.03146	0.22332	0.06538	0.26982	0.07	0.02054	0.2154	0.41518	2.44884	0.8758	0.0767	0.13872	0.40776	0.01794	0.04442	0.0257	1.4638	0.13526	0.09256	0.08784	0.11842	0.10264	0.66758	0.09932	1.31646	0.06288	0.04904	0.09278	0.14408	0.17844	0.12164	0.5338	0.17566	0.31682	0.44004	0.09066	0.06492	0.33092	0.02806	0.13316	0.07434	0.35208	0.38392	0.2646	0.13876	0.08384
+14	0.112	0.3011	0.52386	0.0809	0.44104	0.43016	1.90174	0.2262	0.06212	0.35636	0.42278	4.24008	1.77036	0.02846	0.39798	0.49136	0.02534	0.07584	0.02304	1.70846	0.26546	0.13832	0.06972	0.15988	0.3228	1.12756	0.37958	2.14324	0.12102	0.02884	0.0519	0.48348	0.50896	0.19754	0.87638	0.5234	0.50226	0.43144	0.40904	0.04564	0.5259	0.04344	0.27464	0.13082	0.52796	0.45838	0.26396	0.34348	0.14742
+100	0.215543	0.444171	0.652243	0.0851571	0.522929	0.0914857	0.498386	0.100886	0.0426857	0.219843	0.564271	7.22276	1.65936	0.0976571	0.337957	0.553286	0.0337	0.0741571	0.0250429	2.21247	0.209157	0.240829	0.1434	0.3358	0.2043	0.632486	0.141071	1.6008	0.166771	0.0768714	0.125314	0.5318	0.258129	0.260886	1.2362	0.615457	0.5452	0.169843	0.0933	0.0830143	0.6731	0.0392	0.269657	0.1217	0.4773	0.773057	0.430086	0.180886	0.1966
12hL	0.153943	0.604871	0.688657	0.3801	1.06329	0.686829	3.69633	0.510271	0.19	0.842886	0.859571	3.67959	3.36204	1.22406	0.970343	0.955457	0.198557	0.115614	0.113	1.53047	0.717114	0.313271	1.0922	0.484386	2.1545	2.67837	0.949214	1.7359	1.22649	0.934386	1.09529	0.561543	0.698314	0.365714	0.875529	0.665071	1.00599	1.42527	1.6883	0.289086	0.8275	1.77089	0.455986	0.424229	1.38514	0.838714	1.18036	0.753257	2.19441
24hL	0.04218	0.20312	0.2247	0.06686	0.29836	0.09286	0.29066	0.07948	0.02822	0.24	0.3182	1.82204	1.02954	0.02478	0.1662	0.44174	0.02024	0.03708	0.05208	1.46574	0.17838	0.08134	0.06596	0.02866	0.2108	0.76476	0.1441	0.35534	0.0687	0.03202	0.06532	0.24146	0.22492	0.1621	0.6306	0.21422	0.51756	0.4391	0.17778	0.04056	0.42022	0.03452	0.20108	0.05396	0.47958	0.2764	0.1394	0.1648	0.1642
72hL	0.054975	0.223275	0.21065	0.052025	0.237475	0.0652	0.289175	0.092	0.019	0.247075	0.538375	3.31037	0.974525	0.022125	0.16215	0.509	0.0206	0.0374	0.01755	1.34157	0.1052	0.07665	0.072	0.06	0.1051	0.75855	0.0806	1.21675	0.096225	0.029375	0.05755	0.26785	0.1396	0.15695	0.729075	0.2039	0.4211	0.4182	0.08785	0.04875	0.23045	0.0296	0.14705	0.06555	0.478975	0.3737	0.17	0.19895	0.120625
+118	0.248575	0.626475	0.6289	0.26585	0.684875	0.57535	5.36455	0.5159	0.2009	0.808225	1.10323	3.71135	3.38453	0.287425	1.46845	0.854725	0.108825	0.155125	0.07995	2.3525	0.76135	0.40155	0.394975	0.246025	1.0213	2.8986	0.63645	6.1968	0.35705	0.287425	0.294725	1.10985	0.62795	0.382925	1.51602	0.62885	1.23835	1.19972	0.433775	0.171475	1.01392	0.35	0.4281	0.3855	1.42627	0.724375	0.5409	0.8813	1.09373
+126	0.341433	0.833333	0.9076	0.423633	1.03718	1.14112	2.84633	0.705083	0.226617	0.849267	1.14147	5.16637	4.88878	0.724867	1.41163	0.874533	0.21975	0.219417	0.126017	1.81072	0.98125	0.473983	0.977967	0.308767	3.07073	2.41467	1.27835	5.49603	0.855383	0.754333	0.6181	0.9579	1.08762	0.38035	1.02007	0.91945	1.14223	1.27327	1.90895	0.341383	0.916	1.02498	0.689083	0.603317	1.1226	1.04145	0.947683	0.857833	2.10807
Standard Deviation	0.268297	0.3006	0.316289	0.258101	0.516201	0.552315	9.15593	0.29632	0.274103	0.756161	0.43107	3.03491	1.78239	0.594299	2.21943	0.354138	0.143648	0.0915066	0.0668251	0.365752	0.457414	0.247161	0.61833	0.30909	1.60024	1.2028	0.785382	2.19535	0.615159	0.514858	0.567239	0.700159	0.509128	0.153008	0.360417	0.94063	0.415412	0.682782	0.926157	0.21316	0.36508	0.895409	0.320791	0.29212	0.529715	0.414306	0.527273	0.878162	1.52346
(blank)	0.268297	0.3006	0.316289	0.258101	0.516201	0.552315	9.15593	0.29632	0.274103	0.756161	0.43107	3.03491	1.78239	0.594299	2.21943	0.354138	0.143648	0.0915066	0.0668251	0.365752	0.457414	0.247161	0.61833	0.30909	1.60024	1.2028	0.785382	2.19535	0.615159	0.514858	0.567239	0.700159	0.509128	0.153008	0.360417	0.94063	0.415412	0.682782	0.926157	0.21316	0.36508	0.895409	0.320791	0.29212	0.529715	0.414306	0.527273	0.878162	1.52346
Variance	0.072076	0.135485	0.153071	0.0973864	0.440165	0.42697	112.56	0.124946	0.0820548	0.57962	0.219934	9.21335	5.41254	0.66031	6.47436	0.187127	0.0294541	0.00953359	0.00611299	0.225956	0.289263	0.0763473	0.562824	0.110971	3.0149	2.45882	0.783793	8.53864	0.68873	0.431186	0.513726	0.554037	0.281545	0.0311187	0.137224	1.04995	0.247398	0.686124	1.34133	0.0569873	0.155707	1.56486	0.124966	0.132422	0.439129	0.246171	0.510106	0.832924	3.89302
(blank)	0.072076	0.135485	0.153071	0.0973864	0.440165	0.42697	112.56	0.124946	0.0820548	0.57962	0.219934	9.21335	5.41254	0.66031	6.47436	0.187127	0.0294541	0.00953359	0.00611299	0.225956	0.289263	0.0763473	0.562824	0.110971	3.0149	2.45882	0.783793	8.53864	0.68873	0.431186	0.513726	0.554037	0.281545	0.0311187	0.137224	1.04995	0.247398	0.686124	1.34133	0.0569873	0.155707	1.56486	0.124966	0.132422	0.439129	0.246171	0.510106	0.832924	3.89302
Grand Total	1.07608	1.22133	1.21899	1.06431	1.44924	1.21432	39.9463	1.11896	1.22043	2.65895	1.43761	3.70451	2.1431	1.14483	7.43721	1.26646	0.98383	0.988376	0.961527	1.70601	1.24787	1.08977	1.25379	1.09886	1.77286	1.7954	1.32192	2.17459	1.18624	1.14737	1.27148	1.82415	1.35025	1.09468	1.67589	1.58954	1.35935	1.38261	1.35858	1.03658	1.31142	1.23872	1.17845	1.08899	1.37366	1.31242	1.22342	2.41347	1.55839
[truncated: 11 more columns]

## Sheet: Legend
Legend
hL	hours after LPS injection
hC	hours after Calving, post partum
-	days before calving (antepartum/ap)
+	days after calving (postpartum/pp)
Samples are given as concentration in mM.
Mark that urea was not analyzed in duodenal fluid samples.
71 rumen fluid samples
67 duodenal samples
In total 138 samples
Sample ID	Animal	Group (Carnitine CAR/Controll CON)	Matrix (R/D)	Matrix_long	Time point	Time point_recode
001D12hL	001	CON	D	Duodenum	12hL	12hL
001D24hK	001	CON	D	Duodenum	24hK	24hC
001D24hL	001	CON	D	Duodenum	24hL	24hL
001D72hL	001	CON	D	Duodenum	72hL	72hL
001Dm14	001	CON	D	Duodenum	m14	-14
001Dp100	001	CON	D	Duodenum	p100	+100
001Dp118	001	CON	D	Duodenum	p118	+118
001Dp126	001	CON	D	Duodenum	p126	+126
001Dp14	001	CON	D	Duodenum	p14	+14
039D12hK	039	CON	D	Duodenum	12hK	12hC
039D24hK	039	CON	D	Duodenum	24hK	24hC
039D72hK	039	CON	D	Duodenum	72hK	72hC
039Dm14	039	CON	D	Duodenum	m14	-14
039Dm42	039	CON	D	Duodenum	m42	-42
039Dp14	039	CON	D	Duodenum	p14	+14
245D12hK	245	CON	D	Duodenum	12hK	12hC
245D12hL	245	CON	D	Duodenum	12hL	12hL
245D24hK	245	CON	D	Duodenum	24hK	24hC
245D72hK	245	CON	D	Duodenum	72hK	72hC
245Dm14	245	CON	D	Duodenum	m14	-14
245Dm42	245	CON	D	Duodenum	m42	-42
245Dp100	245	CON	D	Duodenum	p100	+100
245Dp126	245	CON	D	Duodenum	p126	+126
245Dp14	245	CON	D	Duodenum	p14	+14
248D12hL	248	CON	D	Duodenum	12hL	12hL
248Dm14	248	CON	D	Duodenum	m14	-14
248Dm42	248	CON	D	Duodenum	m42	-42
248Dp100	248	CON	D	Duodenum	p100	+100
304D12hK	304	CAR	D	Duodenum	12hK	12hC
304D12hL	304	CAR	D	Duodenum	12hL	12hL
304D24hK	304	CAR	D	Duodenum	24hK	24hC
304D24hL	304	CAR	D	Duodenum	24hL	24hL
304D72hK	304	CAR	D	Duodenum	72hK	72hC
304D72hL	304	CAR	D	Duodenum	72hL	72hL
304Dm42	304	CAR	D	Duodenum	m42	-42
304Dp100	304	CAR	D	Duodenum	p100	+100
304Dp118	304	CAR	D	Duodenum	p118	+118
304Dp126	304	CAR	D	Duodenum	p126	+126
304Dp14	304	CAR	D	Duodenum	p14	+14
306D12hL	306	CAR	D	Duodenum	12hL	12hL
306D24hK	306	CAR	D	Duodenum	24hK	24hC
306D24hL	306	CAR	D	Duodenum	24hL	24hL
306D72hK	306	CAR	D	Duodenum	72hK	72hC
306D72hL	306	CAR	D	Duodenum	72hL	72hL
306Dm14	306	CAR	D	Duodenum	m14	-14
306Dm42	306	CAR	D	Duodenum	m42	-42
306Dp100	306	CAR	D	Duodenum	p100	+100
306Dp118	306	CAR	D	Duodenum	p118	+118
306Dp126	306	CAR	D	Duodenum	p126	+126
329D12hK	329	CAR	D	Duodenum	12hK	12hC
329D12hL	329	CAR	D	Duodenum	12hL	12hL
329D24hK	329	CAR	D	Duodenum	24hK	24hC
329D24hL	329	CAR	D	Duodenum	24hL	24hL
329D72hL	329	CAR	D	Duodenum	72hL	72hL
329Dm42	329	CAR	D	Duodenum	m42	-42
329Dp100	329	CAR	D	Duodenum	p100	+100
329Dp118	329	CAR	D	Duodenum	p118	+118
329Dp126	329	CAR	D	Duodenum	p126	+126
333D12hK	333	CAR	D	Duodenum	12hK	12hC
333D12hL	333	CAR	D	Duodenum	12hL	12hL
333D24hK	333	CAR	D	Duodenum	24hK	24hC
333D24hL	333	CAR	D	Duodenum	24hL	24hL
333D72hK	333	CAR	D	Duodenum	72hK	72hC
333Dm14	333	CAR	D	Duodenum	m14	-14
333Dp100	333	CAR	D	Duodenum	p100	+100
333Dp126	333	CAR	D	Duodenum	p126	+126
333Dp14	333	CAR	D	Duodenum	p14	+14
001P12hL	1	CON	P	Rumen	12hL	12hL
001P24hL	1	CON	P	Rumen	24hL	24hL
001P72hL	1	CON	P	Rumen	72hL	72hL
001Pm14	1	CON	P	Rumen	m14	-14
001Pm42	1	CON	P	Rumen	m42	-42
001Pp100	1	CON	P	Rumen	p100	+100
001Pp118	1	CON	P	Rumen	p118	+118
001Pp126	1	CON	P	Rumen	p126	+126
001Pp14	1	CON	P	Rumen	p14	+14
039P12hK	39	CON	P	Rumen	12hK	12hC
039P24hK	39	CON	P	Rumen	24hK	24hC
039P72hK	39	CON	P	Rumen	72hK	72hC
039Pm14	39	CON	P	Rumen	m14	-14
039Pm42	39	CON	P	Rumen	m42	-42
039Pp14	39	CON	P	Rumen	p14	+14
245P12hK	245	CON	P	Rumen	12hK	12hC
245P12hL	245	CON	P	Rumen	12hL	12hL
245P24hK	245	CON	P	Rumen	24hK	24hC
245P24hL	245	CON	P	Rumen	24hL	24hL
245P72hK	245	CON	P	Rumen	72hK	72hC
245P72hL	245	CON	P	Rumen	72hL	72hL
245Pm14	245	CON	P	Rumen	m14	-14
245Pm42	245	CON	P	Rumen	m42	-42
245Pp100	245	CON	P	Rumen	p100	+100
245Pp118	245	CON	P	Rumen	p118	+118
245Pp126	245	CON	P	Rumen	p126	+126
245Pp14	245	CON	P	Rumen	p14	+14
248P12hK	248	CON	P	Rumen	12hK	12hC
248P12hL	248	CON	P	Rumen	12hL	12hL
248P72hK	248	CON	P	Rumen	72hK	72hC
248Pm14	248	CON	P	Rumen	m14	-14
248Pm42	248	CON	P	Rumen	m42	-42
248Pp100	248	CON	P	Rumen	p100	+100
304P12hL	304	CAR	P	Rumen	12hL	12hL
304P24hK	304	CAR	P	Rumen	24hK	24hC
304P24hL	304	CAR	P	Rumen	24hL	24hL
304P72hK	304	CAR	P	Rumen	72hK	72hC
304P72hL	304	CAR	P	Rumen	72hL	72hL
304Pp118	304	CAR	P	Rumen	p118	+118
304Pp126	304	CAR	P	Rumen	p126	+126
304Pp14	304	CAR	P	Rumen	p14	+14
306P12hL	306	CAR	P	Rumen	12hL	12hL
306P24hK	306	CAR	P	Rumen	24hK	24hC
306P24hL	306	CAR	P	Rumen	24hL	24hL
306P72hK	306	CAR	P	Rumen	72hK	72hC
306P72hL	306	CAR	P	Rumen	72hL	72hL
306Pm14	306	CAR	P	Rumen	m14	-14
306Pm42	306	CAR	P	Rumen	m42	-42
306Pp100	306	CAR	P	Rumen	p100	+100
306Pp118	306	CAR	P	Rumen	p118	+118
306Pp126	306	CAR	P	Rumen	p126	+126
329P12hL	329	CAR	P	Rumen	12hL	12hL
329P24hK	329	CAR	P	Rumen	24hK	24hC
329P24hL	329	CAR	P	Rumen	24hL	24hL
329P72hK	329	CAR	P	Rumen	72hK	72hC
329P72hL	329	CAR	P	Rumen	72hL	72hL
329Pm42	329	CAR	P	Rumen	m42	-42
329Pp118	329	CAR	P	Rumen	p118	+118
329Pp126	329	CAR	P	Rumen	p126	+126
333P12hK	333	CAR	P	Rumen	12hK	12hC
333P12hL	333	CAR	P	Rumen	12hL	12hL
333P24hK	333	CAR	P	Rumen	24hK	24hC
333P24hL	333	CAR	P	Rumen	24hL	24hL
333P72hK	333	CAR	P	Rumen	72hK	72hC
333P72hL	333	CAR	P	Rumen	72hL	72hL
333Pm14	333	CAR	P	Rumen	m14	-14
333Pm42	333	CAR	P	Rumen	m42	-42
333Pp100	333	CAR	P	Rumen	p100	+100
333Pp118	333	CAR	P	Rumen	p118	+118
333Pp126	333	CAR	P	Rumen	p126	+126
333Pp14	333	CAR	P	Rumen	p14	+14
