# Supplementary material for: Cow’s microbiome from antepartum to postpartum: A long-term study covering two physiological challenges
Source: Front Microbiol. 2022 Nov 16;13:1000750. doi: 10.3389/fmicb.2022.1000750 (PMC9709127; doi:10.3389/fmicb.2022.1000750)
Supplement: Supplementary file 5 [file Table_5.XLSX]

## Sheet: Rumen
Supplementary Data 5
Pairwise Correlations - Rumen fluid
Variable1	by Variable2	Correlation	Sample count	Lower 95%	Upper 95%	Signif Prob
2-Phenylpropionate	1,3-Dihydroxyacetone	0,2674	71	0,0364	0,4713	0,0242
3-Hydroxybutyrate	1,3-Dihydroxyacetone	0,5382	71	0,3487	0,6855	<,0001
3-Hydroxybutyrate	2-Phenylpropionate	0,6497	71	0,4908	0,7668	<,0001
3-Hydroxyphenylacetate	1,3-Dihydroxyacetone	0,0855	71	-0,1508	0,3126	0,4784
3-Hydroxyphenylacetate	2-Phenylpropionate	0,4837	71	0,2822	0,6443	<,0001
3-Hydroxyphenylacetate	3-Hydroxybutyrate	0,3405	71	0,1165	0,5316	0,0037
3-Phenylpropionate	1,3-Dihydroxyacetone	0,0003	71	-0,2330	0,2336	0,9982
3-Phenylpropionate	2-Phenylpropionate	-0,0120	71	-0,2446	0,2220	0,9212
3-Phenylpropionate	3-Hydroxybutyrate	-0,0806	71	-0,3081	0,1556	0,5040
3-Phenylpropionate	3-Hydroxyphenylacetate	-0,0141	71	-0,2465	0,2200	0,9074
4-Hydroxybutyrate	1,3-Dihydroxyacetone	0,2755	71	0,0451	0,4781	0,0200
4-Hydroxybutyrate	2-Phenylpropionate	0,6083	71	0,4370	0,7370	<,0001
4-Hydroxybutyrate	3-Hydroxybutyrate	0,6733	71	0,5220	0,7835	<,0001
4-Hydroxybutyrate	3-Hydroxyphenylacetate	0,1208	71	-0,1158	0,3444	0,3157
4-Hydroxybutyrate	3-Phenylpropionate	-0,0899	71	-0,3166	0,1465	0,4560
Acetate	1,3-Dihydroxyacetone	0,1143	71	-0,1222	0,3386	0,3425
Acetate	2-Phenylpropionate	0,3057	71	0,0779	0,5031	0,0095
Acetate	3-Hydroxybutyrate	0,4096	71	0,1949	0,5868	0,0004
Acetate	3-Hydroxyphenylacetate	0,4810	71	0,2790	0,6422	<,0001
Acetate	3-Phenylpropionate	0,3673	71	0,1466	0,5532	0,0016
Acetate	4-Hydroxybutyrate	0,1267	71	-0,1099	0,3497	0,2924
Acetoacetate	1,3-Dihydroxyacetone	0,3237	71	0,0978	0,5179	0,0059
Acetoacetate	2-Phenylpropionate	0,7091	71	0,5702	0,8087	<,0001
Acetoacetate	3-Hydroxybutyrate	0,7807	71	0,6693	0,8578	<,0001
Acetoacetate	3-Hydroxyphenylacetate	0,4241	71	0,2118	0,5982	0,0002
Acetoacetate	3-Phenylpropionate	-0,1959	71	-0,4104	0,0392	0,1016
Acetoacetate	4-Hydroxybutyrate	0,7116	71	0,5735	0,8104	<,0001
Acetoacetate	Acetate	0,3891	71	0,1714	0,5706	0,0008
Acetone	1,3-Dihydroxyacetone	0,0555	71	-0,1801	0,2851	0,6455
Acetone	2-Phenylpropionate	0,5957	71	0,4209	0,7279	<,0001
Acetone	3-Hydroxybutyrate	0,6815	71	0,5330	0,7893	<,0001
Acetone	3-Hydroxyphenylacetate	0,4656	71	0,2607	0,6305	<,0001
Acetone	3-Phenylpropionate	-0,1675	71	-0,3858	0,0685	0,1626
Acetone	4-Hydroxybutyrate	0,6361	71	0,4730	0,7571	<,0001
Acetone	Acetate	0,4326	71	0,2217	0,6049	0,0002
Acetone	Acetoacetate	0,7325	71	0,6020	0,8248	<,0001
Adipate	1,3-Dihydroxyacetone	0,1145	71	-0,1221	0,3388	0,3417
Adipate	2-Phenylpropionate	0,4102	71	0,1956	0,5873	0,0004
Adipate	3-Hydroxybutyrate	0,4673	71	0,2627	0,6318	<,0001
Adipate	3-Hydroxyphenylacetate	0,4693	71	0,2651	0,6333	<,0001
Adipate	3-Phenylpropionate	0,1891	71	-0,0462	0,4046	0,1142
Adipate	4-Hydroxybutyrate	0,2220	71	-0,0119	0,4329	0,0628
Adipate	Acetate	0,5836	71	0,4055	0,7190	<,0001
Adipate	Acetoacetate	0,3890	71	0,1712	0,5705	0,0008
Adipate	Acetone	0,4490	71	0,2409	0,6176	<,0001
Alanine	1,3-Dihydroxyacetone	0,1834	71	-0,0521	0,3996	0,1258
Alanine	2-Phenylpropionate	0,7713	71	0,6561	0,8514	<,0001
Alanine	3-Hydroxybutyrate	0,7324	71	0,6020	0,8248	<,0001
Alanine	3-Hydroxyphenylacetate	0,5154	71	0,3206	0,6683	<,0001
Alanine	3-Phenylpropionate	-0,0108	71	-0,2435	0,2230	0,9286
Alanine	4-Hydroxybutyrate	0,6610	71	0,5056	0,7748	<,0001
Alanine	Acetate	0,3918	71	0,1745	0,5728	0,0007
Alanine	Acetoacetate	0,7364	71	0,6075	0,8276	<,0001
Alanine	Acetone	0,7473	71	0,6225	0,8350	<,0001
Alanine	Adipate	0,6134	71	0,4435	0,7407	<,0001
Allantoin	1,3-Dihydroxyacetone	0,0317	71	-0,2031	0,2630	0,7932
Allantoin	2-Phenylpropionate	0,0307	71	-0,2040	0,2621	0,7993
Allantoin	3-Hydroxybutyrate	0,0042	71	-0,2293	0,2373	0,9724
Allantoin	3-Hydroxyphenylacetate	0,2919	71	0,0629	0,4917	0,0135
Allantoin	3-Phenylpropionate	0,0139	71	-0,2201	0,2464	0,9081
Allantoin	4-Hydroxybutyrate	-0,1513	71	-0,3715	0,0850	0,2078
Allantoin	Acetate	0,1916	71	-0,0437	0,4067	0,1095
Allantoin	Acetoacetate	0,1438	71	-0,0926	0,3648	0,2316
Allantoin	Acetone	0,0650	71	-0,1709	0,2938	0,5904
Allantoin	Adipate	0,0974	71	-0,1391	0,3234	0,4190
Allantoin	Alanine	-0,0741	71	-0,3022	0,1620	0,5392
Aspartate	1,3-Dihydroxyacetone	0,8155	71	0,7190	0,8812	<,0001
Aspartate	2-Phenylpropionate	0,3568	71	0,1347	0,5447	0,0023
Aspartate	3-Hydroxybutyrate	0,6853	71	0,5380	0,7920	<,0001
Aspartate	3-Hydroxyphenylacetate	0,0506	71	-0,1849	0,2806	0,6752
Aspartate	3-Phenylpropionate	0,1253	71	-0,1112	0,3484	0,2977
Aspartate	4-Hydroxybutyrate	0,4410	71	0,2315	0,6114	0,0001
Aspartate	Acetate	0,1450	71	-0,0914	0,3660	0,2275
Aspartate	Acetoacetate	0,4379	71	0,2278	0,6090	0,0001
Aspartate	Acetone	0,1461	71	-0,0903	0,3669	0,2241
Aspartate	Adipate	0,1473	71	-0,0890	0,3680	0,2202
Aspartate	Alanine	0,3434	71	0,1197	0,5339	0,0034
Aspartate	Allantoin	-0,0300	71	-0,2615	0,2048	0,8040
Benzoate	1,3-Dihydroxyacetone	-0,0516	71	-0,2815	0,1839	0,6689
Benzoate	2-Phenylpropionate	0,1882	71	-0,0472	0,4038	0,1160
Benzoate	3-Hydroxybutyrate	0,1787	71	-0,0570	0,3955	0,1360
Benzoate	3-Hydroxyphenylacetate	0,6387	71	0,4764	0,7589	<,0001
Benzoate	3-Phenylpropionate	-0,0360	71	-0,2670	0,1990	0,7657
Benzoate	4-Hydroxybutyrate	-0,0174	71	-0,2497	0,2168	0,8854
Benzoate	Acetate	0,3349	71	0,1102	0,5270	0,0043
Benzoate	Acetoacetate	0,1687	71	-0,0672	0,3868	0,1595
Benzoate	Acetone	0,4297	71	0,2182	0,6026	0,0002
Benzoate	Adipate	0,1510	71	-0,0853	0,3712	0,2088
Benzoate	Alanine	0,2684	71	0,0375	0,4722	0,0236
Benzoate	Allantoin	0,0723	71	-0,1638	0,3005	0,5491
Benzoate	Aspartate	-0,0582	71	-0,2876	0,1775	0,6295
Butyrate	1,3-Dihydroxyacetone	0,0767	71	-0,1595	0,3045	0,5252
Butyrate	2-Phenylpropionate	0,4064	71	0,1912	0,5843	0,0004
Butyrate	3-Hydroxybutyrate	0,4303	71	0,2190	0,6031	0,0002
Butyrate	3-Hydroxyphenylacetate	0,4618	71	0,2560	0,6275	<,0001
Butyrate	3-Phenylpropionate	0,1923	71	-0,0429	0,4074	0,1081
Butyrate	4-Hydroxybutyrate	0,1849	71	-0,0505	0,4009	0,1226
Butyrate	Acetate	0,5844	71	0,4066	0,7196	<,0001
Butyrate	Acetoacetate	0,3813	71	0,1624	0,5644	0,0010
Butyrate	Acetone	0,3903	71	0,1727	0,5716	0,0008
Butyrate	Adipate	0,9745	71	0,9592	0,9840	<,0001
Butyrate	Alanine	0,6037	71	0,4311	0,7337	<,0001
Butyrate	Allantoin	0,0442	71	-0,1911	0,2747	0,7142
Butyrate	Aspartate	0,1105	71	-0,1261	0,3351	0,3591
Butyrate	Benzoate	0,1640	71	-0,0721	0,3826	0,1718
Cadaverine	1,3-Dihydroxyacetone	0,0377	71	-0,1973	0,2686	0,7549
Cadaverine	2-Phenylpropionate	0,4692	71	0,2649	0,6332	<,0001
Cadaverine	3-Hydroxybutyrate	0,3512	71	0,1284	0,5402	0,0027
Cadaverine	3-Hydroxyphenylacetate	0,0849	71	-0,1514	0,3120	0,4816
Cadaverine	3-Phenylpropionate	0,1175	71	-0,1190	0,3415	0,3290
Cadaverine	4-Hydroxybutyrate	0,6899	71	0,5441	0,7952	<,0001
Cadaverine	Acetate	0,0097	71	-0,2241	0,2425	0,9357
Cadaverine	Acetoacetate	0,4605	71	0,2546	0,6265	<,0001
Cadaverine	Acetone	0,4022	71	0,1864	0,5810	0,0005
Cadaverine	Adipate	0,1093	71	-0,1272	0,3341	0,3642
Cadaverine	Alanine	0,5993	71	0,4255	0,7305	<,0001
Cadaverine	Allantoin	-0,1857	71	-0,4016	0,0498	0,1211
Cadaverine	Aspartate	0,1778	71	-0,0579	0,3947	0,1380
Cadaverine	Benzoate	-0,0007	71	-0,2339	0,2327	0,9955
Cadaverine	Butyrate	0,1144	71	-0,1221	0,3387	0,3420
Caffeine	1,3-Dihydroxyacetone	0,1225	71	-0,1140	0,3460	0,3087
Caffeine	2-Phenylpropionate	0,0324	71	-0,2025	0,2637	0,7887
Caffeine	3-Hydroxybutyrate	0,0159	71	-0,2183	0,2482	0,8956
Caffeine	3-Hydroxyphenylacetate	0,1716	71	-0,0643	0,3893	0,1524
Caffeine	3-Phenylpropionate	-0,0442	71	-0,2747	0,1910	0,7141
Caffeine	4-Hydroxybutyrate	-0,0885	71	-0,3153	0,1478	0,4628
Caffeine	Acetate	0,0560	71	-0,1796	0,2856	0,6426
Caffeine	Acetoacetate	0,1180	71	-0,1186	0,3419	0,3271
Caffeine	Acetone	-0,0031	71	-0,2362	0,2304	0,9796
Caffeine	Adipate	0,0305	71	-0,2043	0,2619	0,8009
Caffeine	Alanine	-0,0267	71	-0,2584	0,2079	0,8248
Caffeine	Allantoin	0,1633	71	-0,0728	0,3821	0,1736
Caffeine	Aspartate	0,0257	71	-0,2088	0,2575	0,8314
Caffeine	Benzoate	0,1334	71	-0,1031	0,3556	0,2675
Caffeine	Butyrate	0,0233	71	-0,2111	0,2552	0,8470
Caffeine	Cadaverine	-0,0858	71	-0,3129	0,1505	0,4766
Carnitine	1,3-Dihydroxyacetone	0,3792	71	0,1601	0,5627	0,0011
Carnitine	2-Phenylpropionate	0,6442	71	0,4835	0,7628	<,0001
Carnitine	3-Hydroxybutyrate	0,7920	71	0,6853	0,8654	<,0001
Carnitine	3-Hydroxyphenylacetate	0,3592	71	0,1374	0,5467	0,0021
Carnitine	3-Phenylpropionate	-0,1863	71	-0,4021	0,0491	0,1198
Carnitine	4-Hydroxybutyrate	0,7522	71	0,6293	0,8384	<,0001
Carnitine	Acetate	0,3625	71	0,1411	0,5493	0,0019
Carnitine	Acetoacetate	0,8581	71	0,7811	0,9093	<,0001
Carnitine	Acetone	0,8378	71	0,7513	0,8960	<,0001
Carnitine	Adipate	0,3143	71	0,0874	0,5102	0,0076
Carnitine	Alanine	0,7177	71	0,5818	0,8146	<,0001
Carnitine	Allantoin	0,0176	71	-0,2166	0,2498	0,8844
Carnitine	Aspartate	0,4648	71	0,2596	0,6298	<,0001
Carnitine	Benzoate	0,2656	71	0,0344	0,4698	0,0252
Carnitine	Butyrate	0,2799	71	0,0499	0,4818	0,0181
Carnitine	Cadaverine	0,3868	71	0,1687	0,5688	0,0009
Carnitine	Caffeine	0,0694	71	-0,1666	0,2979	0,5650
Choline	1,3-Dihydroxyacetone	0,7373	71	0,6087	0,8282	<,0001
Choline	2-Phenylpropionate	0,5624	71	0,3788	0,7034	<,0001
Choline	3-Hydroxybutyrate	0,7319	71	0,6012	0,8244	<,0001
Choline	3-Hydroxyphenylacetate	0,2108	71	-0,0237	0,4232	0,0777
Choline	3-Phenylpropionate	0,0969	71	-0,1396	0,3229	0,4215
Choline	4-Hydroxybutyrate	0,5234	71	0,3304	0,6743	<,0001
Choline	Acetate	0,3055	71	0,0778	0,5030	0,0096
Choline	Acetoacetate	0,6350	71	0,4716	0,7563	<,0001
Choline	Acetone	0,3432	71	0,1195	0,5338	0,0034
Choline	Adipate	0,2684	71	0,0375	0,4722	0,0236
Choline	Alanine	0,5442	71	0,3561	0,6899	<,0001
Choline	Allantoin	0,0482	71	-0,1872	0,2784	0,6896
Choline	Aspartate	0,8382	71	0,7520	0,8963	<,0001
Choline	Benzoate	0,0132	71	-0,2207	0,2458	0,9128
Choline	Butyrate	0,2437	71	0,0110	0,4514	0,0405
Choline	Cadaverine	0,3559	71	0,1337	0,5441	0,0023
Choline	Caffeine	0,0902	71	-0,1462	0,3168	0,4546
Choline	Carnitine	0,5891	71	0,4125	0,7230	<,0001
Dimethylamine	1,3-Dihydroxyacetone	0,7456	71	0,6202	0,8338	<,0001
Dimethylamine	2-Phenylpropionate	0,4680	71	0,2635	0,6323	<,0001
Dimethylamine	3-Hydroxybutyrate	0,8125	71	0,7147	0,8792	<,0001
Dimethylamine	3-Hydroxyphenylacetate	0,2771	71	0,0468	0,4794	0,0193
Dimethylamine	3-Phenylpropionate	0,0253	71	-0,2092	0,2571	0,8338
Dimethylamine	4-Hydroxybutyrate	0,4388	71	0,2289	0,6097	0,0001
Dimethylamine	Acetate	0,2735	71	0,0430	0,4764	0,0210
Dimethylamine	Acetoacetate	0,5815	71	0,4029	0,7175	<,0001
Dimethylamine	Acetone	0,3654	71	0,1444	0,5517	0,0017
Dimethylamine	Adipate	0,3179	71	0,0914	0,5132	0,0069
Dimethylamine	Alanine	0,5062	71	0,3095	0,6614	<,0001
Dimethylamine	Allantoin	0,0739	71	-0,1622	0,3020	0,5402
Dimethylamine	Aspartate	0,8976	71	0,8402	0,9351	<,0001
Dimethylamine	Benzoate	0,0798	71	-0,1564	0,3074	0,5083
Dimethylamine	Butyrate	0,2760	71	0,0456	0,4785	0,0198
Dimethylamine	Cadaverine	0,1218	71	-0,1148	0,3453	0,3117
Dimethylamine	Caffeine	0,0440	71	-0,1913	0,2745	0,7157
Dimethylamine	Carnitine	0,6266	71	0,4606	0,7502	<,0001
Dimethylamine	Choline	0,7989	71	0,6952	0,8700	<,0001
Ethanol	1,3-Dihydroxyacetone	0,5760	71	0,3959	0,7135	<,0001
Ethanol	2-Phenylpropionate	0,7347	71	0,6051	0,8263	<,0001
Ethanol	3-Hydroxybutyrate	0,9137	71	0,8648	0,9455	<,0001
Ethanol	3-Hydroxyphenylacetate	0,3193	71	0,0929	0,5143	0,0066
Ethanol	3-Phenylpropionate	-0,0273	71	-0,2589	0,2074	0,8214
Ethanol	4-Hydroxybutyrate	0,7360	71	0,6070	0,8273	<,0001
Ethanol	Acetate	0,4147	71	0,2009	0,5909	0,0003
Ethanol	Acetoacetate	0,8132	71	0,7157	0,8796	<,0001
Ethanol	Acetone	0,6274	71	0,4616	0,7508	<,0001
Ethanol	Adipate	0,4098	71	0,1952	0,5870	0,0004
Ethanol	Alanine	0,7435	71	0,6172	0,8324	<,0001
Ethanol	Allantoin	-0,0179	71	-0,2502	0,2163	0,8822
Ethanol	Aspartate	0,7116	71	0,5735	0,8103	<,0001
Ethanol	Benzoate	0,1406	71	-0,0958	0,3620	0,2422
Ethanol	Butyrate	0,3798	71	0,1607	0,5632	0,0011
Ethanol	Cadaverine	0,4735	71	0,2700	0,6365	<,0001
Ethanol	Caffeine	0,0273	71	-0,2073	0,2590	0,8209
Ethanol	Carnitine	0,7945	71	0,6889	0,8671	<,0001
Ethanol	Choline	0,7929	71	0,6866	0,8660	<,0001
Ethanol	Dimethylamine	0,7812	71	0,6701	0,8581	<,0001
Ferulate	1,3-Dihydroxyacetone	0,0753	71	-0,1608	0,3033	0,5326
Ferulate	2-Phenylpropionate	0,4167	71	0,2032	0,5924	0,0003
Ferulate	3-Hydroxybutyrate	0,2860	71	0,0564	0,4868	0,0156
Ferulate	3-Hydroxyphenylacetate	0,8710	71	0,8004	0,9178	<,0001
Ferulate	3-Phenylpropionate	0,0119	71	-0,2220	0,2446	0,9213
Ferulate	4-Hydroxybutyrate	0,0699	71	-0,1662	0,2983	0,5627
Ferulate	Acetate	0,5853	71	0,4077	0,7202	<,0001
Ferulate	Acetoacetate	0,4316	71	0,2205	0,6041	0,0002
Ferulate	Acetone	0,4663	71	0,2614	0,6309	<,0001
Ferulate	Adipate	0,4460	71	0,2374	0,6153	<,0001
Ferulate	Alanine	0,4632	71	0,2577	0,6286	<,0001
Ferulate	Allantoin	0,2377	71	0,0046	0,4462	0,0460
Ferulate	Aspartate	0,0037	71	-0,2298	0,2368	0,9753
Ferulate	Benzoate	0,6262	71	0,4601	0,7499	<,0001
Ferulate	Butyrate	0,4452	71	0,2365	0,6147	<,0001
Ferulate	Cadaverine	0,0571	71	-0,1786	0,2866	0,6364
Ferulate	Caffeine	0,2441	71	0,0114	0,4516	0,0403
Ferulate	Carnitine	0,3622	71	0,1407	0,5491	0,0019
Ferulate	Choline	0,2343	71	0,0010	0,4434	0,0492
Ferulate	Dimethylamine	0,1695	71	-0,0664	0,3875	0,1576
Ferulate	Ethanol	0,3007	71	0,0725	0,4990	0,0108
Formate	1,3-Dihydroxyacetone	-0,0379	71	-0,2688	0,1972	0,7538
Formate	2-Phenylpropionate	0,1750	71	-0,0607	0,3923	0,1443
Formate	3-Hydroxybutyrate	0,2408	71	0,0080	0,4489	0,0430
Formate	3-Hydroxyphenylacetate	0,0171	71	-0,2171	0,2494	0,8875
Formate	3-Phenylpropionate	-0,0568	71	-0,2863	0,1789	0,6381
Formate	4-Hydroxybutyrate	0,5595	71	0,3751	0,7013	<,0001
Formate	Acetate	0,0826	71	-0,1537	0,3099	0,4937
Formate	Acetoacetate	0,3328	71	0,1078	0,5253	0,0046
Formate	Acetone	0,3544	71	0,1320	0,5428	0,0024
Formate	Adipate	0,1176	71	-0,1189	0,3415	0,3286
Formate	Alanine	0,2043	71	-0,0304	0,4177	0,0874
Formate	Allantoin	0,0087	71	-0,2251	0,2415	0,9425
Formate	Aspartate	-0,0099	71	-0,2426	0,2240	0,9350
Formate	Benzoate	-0,1221	71	-0,3456	0,1145	0,3104
Formate	Butyrate	0,0662	71	-0,1697	0,2950	0,5831
Formate	Cadaverine	0,1873	71	-0,0481	0,4030	0,1177
Formate	Caffeine	0,0110	71	-0,2228	0,2437	0,9273
Formate	Carnitine	0,4418	71	0,2324	0,6120	0,0001
Formate	Choline	0,0351	71	-0,1998	0,2663	0,7711
Formate	Dimethylamine	0,0827	71	-0,1536	0,3100	0,4929
Formate	Ethanol	0,2207	71	-0,0133	0,4317	0,0644
Formate	Ferulate	0,0436	71	-0,1916	0,2741	0,7179
Fumarate	1,3-Dihydroxyacetone	0,0281	71	-0,2065	0,2597	0,8158
Fumarate	2-Phenylpropionate	0,0038	71	-0,2297	0,2369	0,9747
Fumarate	3-Hydroxybutyrate	0,0417	71	-0,1935	0,2723	0,7300
Fumarate	3-Hydroxyphenylacetate	0,4122	71	0,1979	0,5889	0,0004
Fumarate	3-Phenylpropionate	0,0715	71	-0,1646	0,2998	0,5537
Fumarate	4-Hydroxybutyrate	-0,1828	71	-0,3991	0,0527	0,1270
Fumarate	Acetate	0,3074	71	0,0798	0,5045	0,0091
Fumarate	Acetoacetate	0,1570	71	-0,0792	0,3765	0,1909
Fumarate	Acetone	0,1376	71	-0,0989	0,3593	0,2526
Fumarate	Adipate	0,1709	71	-0,0650	0,3887	0,1541
Fumarate	Alanine	-0,0105	71	-0,2432	0,2234	0,9308
Fumarate	Allantoin	0,8106	71	0,7120	0,8779	<,0001
Fumarate	Aspartate	-0,0091	71	-0,2419	0,2247	0,9400
Fumarate	Benzoate	0,2617	71	0,0303	0,4666	0,0275
Fumarate	Butyrate	0,1207	71	-0,1159	0,3443	0,3162
Fumarate	Cadaverine	-0,1943	71	-0,4091	0,0408	0,1044
Fumarate	Caffeine	0,2454	71	0,0128	0,4528	0,0391
Fumarate	Carnitine	0,0422	71	-0,1930	0,2728	0,7270
Fumarate	Choline	0,0778	71	-0,1584	0,3055	0,5192
Fumarate	Dimethylamine	0,0910	71	-0,1454	0,3176	0,4502
Fumarate	Ethanol	0,0050	71	-0,2285	0,2381	0,9668
Fumarate	Ferulate	0,4877	71	0,2870	0,6473	<,0001
Fumarate	Formate	0,0507	71	-0,1847	0,2807	0,6743
Glucose	1,3-Dihydroxyacetone	0,3105	71	0,0832	0,5070	0,0084
Glucose	2-Phenylpropionate	0,6314	71	0,4669	0,7537	<,0001
Glucose	3-Hydroxybutyrate	0,7184	71	0,5827	0,8151	<,0001
Glucose	3-Hydroxyphenylacetate	0,4307	71	0,2195	0,6034	0,0002
Glucose	3-Phenylpropionate	-0,1854	71	-0,4013	0,0501	0,1217
Glucose	4-Hydroxybutyrate	0,6199	71	0,4519	0,7454	<,0001
Glucose	Acetate	0,4429	71	0,2338	0,6129	0,0001
Glucose	Acetoacetate	0,7722	71	0,6573	0,8520	<,0001
Glucose	Acetone	0,8232	71	0,7302	0,8863	<,0001
Glucose	Adipate	0,3277	71	0,1022	0,5211	0,0053
Glucose	Alanine	0,7267	71	0,5941	0,8208	<,0001
Glucose	Allantoin	0,0031	71	-0,2304	0,2362	0,9796
Glucose	Aspartate	0,3619	71	0,1405	0,5489	0,0019
Glucose	Benzoate	0,3970	71	0,1804	0,5769	0,0006
Glucose	Butyrate	0,3206	71	0,0944	0,5154	0,0064
Glucose	Cadaverine	0,4087	71	0,1939	0,5861	0,0004
Glucose	Caffeine	0,0358	71	-0,1992	0,2668	0,7672
Glucose	Carnitine	0,8938	71	0,8345	0,9326	<,0001
Glucose	Choline	0,5392	71	0,3499	0,6862	<,0001
Glucose	Dimethylamine	0,5072	71	0,3107	0,6622	<,0001
Glucose	Ethanol	0,7511	71	0,6278	0,8376	<,0001
Glucose	Ferulate	0,4784	71	0,2758	0,6402	<,0001
Glucose	Formate	0,1623	71	-0,0737	0,3812	0,1762
Glucose	Fumarate	0,0706	71	-0,1654	0,2990	0,5583
Glutamate	1,3-Dihydroxyacetone	0,2098	71	-0,0247	0,4225	0,0790
Glutamate	2-Phenylpropionate	0,6601	71	0,5044	0,7742	<,0001
Glutamate	3-Hydroxybutyrate	0,6394	71	0,4772	0,7594	<,0001
Glutamate	3-Hydroxyphenylacetate	0,2795	71	0,0495	0,4814	0,0182
Glutamate	3-Phenylpropionate	-0,1057	71	-0,3309	0,1308	0,3801
Glutamate	4-Hydroxybutyrate	0,7750	71	0,6613	0,8539	<,0001
Glutamate	Acetate	0,2906	71	0,0615	0,4907	0,0139
Glutamate	Acetoacetate	0,7482	71	0,6238	0,8357	<,0001
Glutamate	Acetone	0,7012	71	0,5593	0,8031	<,0001
Glutamate	Adipate	0,2426	71	0,0098	0,4504	0,0415
Glutamate	Alanine	0,7086	71	0,5694	0,8083	<,0001
Glutamate	Allantoin	-0,1787	71	-0,3955	0,0570	0,1361
Glutamate	Aspartate	0,3572	71	0,1351	0,5451	0,0022
Glutamate	Benzoate	0,1816	71	-0,0540	0,3981	0,1296
Glutamate	Butyrate	0,2511	71	0,0189	0,4576	0,0347
Glutamate	Cadaverine	0,5780	71	0,3984	0,7149	<,0001
Glutamate	Caffeine	-0,0575	71	-0,2869	0,1782	0,6340
Glutamate	Carnitine	0,7386	71	0,6105	0,8290	<,0001
Glutamate	Choline	0,5608	71	0,3768	0,7022	<,0001
Glutamate	Dimethylamine	0,3987	71	0,1823	0,5782	0,0006
Glutamate	Ethanol	0,7468	71	0,6219	0,8347	<,0001
Glutamate	Ferulate	0,3047	71	0,0768	0,5023	0,0098
Glutamate	Formate	0,2771	71	0,0468	0,4794	0,0193
Glutamate	Fumarate	-0,1183	71	-0,3422	0,1182	0,3257
Glutamate	Glucose	0,7661	71	0,6487	0,8478	<,0001
Glycerol	1,3-Dihydroxyacetone	0,8386	71	0,7525	0,8965	<,0001
Glycerol	2-Phenylpropionate	0,5273	71	0,3352	0,6773	<,0001
Glycerol	3-Hydroxybutyrate	0,7401	71	0,6125	0,8301	<,0001
Glycerol	3-Hydroxyphenylacetate	0,0956	71	-0,1408	0,3218	0,4275
Glycerol	3-Phenylpropionate	0,0630	71	-0,1728	0,2920	0,6015
Glycerol	4-Hydroxybutyrate	0,6590	71	0,5030	0,7734	<,0001
Glycerol	Acetate	0,1498	71	-0,0866	0,3701	0,2126
Glycerol	Acetoacetate	0,5671	71	0,3846	0,7069	<,0001
Glycerol	Acetone	0,3035	71	0,0756	0,5013	0,0101
Glycerol	Adipate	0,1982	71	-0,0369	0,4124	0,0976
Glycerol	Alanine	0,4904	71	0,2903	0,6494	<,0001
Glycerol	Allantoin	-0,0940	71	-0,3203	0,1424	0,4354
Glycerol	Aspartate	0,8747	71	0,8058	0,9202	<,0001
Glycerol	Benzoate	-0,0822	71	-0,3095	0,1541	0,4957
Glycerol	Butyrate	0,1656	71	-0,0704	0,3841	0,1674
Glycerol	Cadaverine	0,4013	71	0,1853	0,5802	0,0005
Glycerol	Caffeine	0,0121	71	-0,2218	0,2448	0,9199
Glycerol	Carnitine	0,6088	71	0,4377	0,7374	<,0001
Glycerol	Choline	0,8724	71	0,8024	0,9187	<,0001
Glycerol	Dimethylamine	0,8041	71	0,7026	0,8735	<,0001
Glycerol	Ethanol	0,8231	71	0,7300	0,8862	<,0001
Glycerol	Ferulate	0,0487	71	-0,1867	0,2788	0,6867
Glycerol	Formate	0,1071	71	-0,1295	0,3321	0,3742
Glycerol	Fumarate	-0,0971	71	-0,3231	0,1393	0,4203
Glycerol	Glucose	0,5358	71	0,3457	0,6836	<,0001
Glycerol	Glutamate	0,5690	71	0,3871	0,7083	<,0001
Glycine	1,3-Dihydroxyacetone	0,6964	71	0,5529	0,7998	<,0001
Glycine	2-Phenylpropionate	0,6610	71	0,5057	0,7749	<,0001
Glycine	3-Hydroxybutyrate	0,8251	71	0,7329	0,8875	<,0001
Glycine	3-Hydroxyphenylacetate	0,4301	71	0,2187	0,6029	0,0002
Glycine	3-Phenylpropionate	-0,0499	71	-0,2800	0,1855	0,6792
Glycine	4-Hydroxybutyrate	0,6919	71	0,5469	0,7966	<,0001
Glycine	Acetate	0,3589	71	0,1370	0,5464	0,0021
Glycine	Acetoacetate	0,7511	71	0,6279	0,8377	<,0001
Glycine	Acetone	0,6534	71	0,4957	0,7694	<,0001
Glycine	Adipate	0,3749	71	0,1552	0,5593	0,0013
Glycine	Alanine	0,7203	71	0,5854	0,8164	<,0001
Glycine	Allantoin	0,0125	71	-0,2214	0,2451	0,9174
Glycine	Aspartate	0,7036	71	0,5626	0,8048	<,0001
Glycine	Benzoate	0,2213	71	-0,0127	0,4323	0,0637
Glycine	Butyrate	0,3236	71	0,0977	0,5178	0,0059
Glycine	Cadaverine	0,4001	71	0,1840	0,5794	0,0005
Glycine	Caffeine	0,0622	71	-0,1736	0,2913	0,6061
Glycine	Carnitine	0,8547	71	0,7761	0,9071	<,0001
Glycine	Choline	0,7981	71	0,6940	0,8695	<,0001
Glycine	Dimethylamine	0,7696	71	0,6537	0,8502	<,0001
Glycine	Ethanol	0,8570	71	0,7795	0,9086	<,0001
Glycine	Ferulate	0,4079	71	0,1930	0,5855	0,0004
Glycine	Formate	0,2884	71	0,0591	0,4889	0,0147
Glycine	Fumarate	0,0847	71	-0,1516	0,3118	0,4825
Glycine	Glucose	0,7898	71	0,6822	0,8639	<,0001
Glycine	Glutamate	0,6597	71	0,5040	0,7739	<,0001
Glycine	Glycerol	0,8391	71	0,7533	0,8968	<,0001
Histidine	1,3-Dihydroxyacetone	-0,0077	71	-0,2406	0,2260	0,9489
Histidine	2-Phenylpropionate	0,2959	71	0,0672	0,4950	0,0122
Histidine	3-Hydroxybutyrate	0,2689	71	0,0380	0,4726	0,0234
Histidine	3-Hydroxyphenylacetate	0,7647	71	0,6468	0,8469	<,0001
Histidine	3-Phenylpropionate	0,0088	71	-0,2249	0,2417	0,9416
Histidine	4-Hydroxybutyrate	0,0802	71	-0,1560	0,3078	0,5060
Histidine	Acetate	0,5004	71	0,3024	0,6570	<,0001
Histidine	Acetoacetate	0,3694	71	0,1489	0,5549	0,0015
Histidine	Acetone	0,5443	71	0,3562	0,6900	<,0001
Histidine	Adipate	0,3075	71	0,0799	0,5046	0,0091
Histidine	Alanine	0,3590	71	0,1372	0,5465	0,0021
Histidine	Allantoin	0,2831	71	0,0534	0,4844	0,0167
Histidine	Aspartate	-0,0122	71	-0,2448	0,2217	0,9193
Histidine	Benzoate	0,7269	71	0,5944	0,8210	<,0001
Histidine	Butyrate	0,2785	71	0,0483	0,4806	0,0187
Histidine	Cadaverine	-0,0054	71	-0,2384	0,2282	0,9642
Histidine	Caffeine	0,2189	71	-0,0152	0,4302	0,0667
Histidine	Carnitine	0,4120	71	0,1977	0,5887	0,0004
Histidine	Choline	0,1300	71	-0,1065	0,3526	0,2799
Histidine	Dimethylamine	0,1892	71	-0,0461	0,4047	0,1140
Histidine	Ethanol	0,2387	71	0,0057	0,4471	0,0450
Histidine	Ferulate	0,7989	71	0,6952	0,8700	<,0001
Histidine	Formate	0,0997	71	-0,1368	0,3254	0,4082
Histidine	Fumarate	0,5609	71	0,3769	0,7023	<,0001
Histidine	Glucose	0,5152	71	0,3204	0,6682	<,0001
Histidine	Glutamate	0,3042	71	0,0763	0,5019	0,0099
Histidine	Glycerol	0,0099	71	-0,2239	0,2426	0,9348
Histidine	Glycine	0,3801	71	0,1611	0,5635	0,0011
Hypoxanthine	1,3-Dihydroxyacetone	0,0491	71	-0,1863	0,2792	0,6842
Hypoxanthine	2-Phenylpropionate	0,4874	71	0,2867	0,6471	<,0001
Hypoxanthine	3-Hydroxybutyrate	0,4532	71	0,2459	0,6209	<,0001
Hypoxanthine	3-Hydroxyphenylacetate	0,6635	71	0,5091	0,7766	<,0001
Hypoxanthine	3-Phenylpropionate	-0,1788	71	-0,3956	0,0568	0,1356
Hypoxanthine	4-Hydroxybutyrate	0,2641	71	0,0328	0,4685	0,0261
Hypoxanthine	Acetate	0,5185	71	0,3244	0,6707	<,0001
Hypoxanthine	Acetoacetate	0,6422	71	0,4809	0,7614	<,0001
Hypoxanthine	Acetone	0,5899	71	0,4135	0,7236	<,0001
Hypoxanthine	Adipate	0,4660	71	0,2611	0,6308	<,0001
Hypoxanthine	Alanine	0,5161	71	0,3215	0,6689	<,0001
Hypoxanthine	Allantoin	0,2112	71	-0,0232	0,4237	0,0770
Hypoxanthine	Aspartate	0,0789	71	-0,1573	0,3066	0,5130
Hypoxanthine	Benzoate	0,4361	71	0,2257	0,6076	0,0001
Hypoxanthine	Butyrate	0,4760	71	0,2730	0,6384	<,0001
Hypoxanthine	Cadaverine	0,0099	71	-0,2239	0,2426	0,9348
Hypoxanthine	Caffeine	0,1798	71	-0,0559	0,3965	0,1335
Hypoxanthine	Carnitine	0,6057	71	0,4336	0,7351	<,0001
Hypoxanthine	Choline	0,3172	71	0,0906	0,5126	0,0070
Hypoxanthine	Dimethylamine	0,2874	71	0,0580	0,4880	0,0151
Hypoxanthine	Ethanol	0,4097	71	0,1950	0,5869	0,0004
Hypoxanthine	Ferulate	0,7342	71	0,6044	0,8260	<,0001
Hypoxanthine	Formate	0,3562	71	0,1340	0,5442	0,0023
Hypoxanthine	Fumarate	0,4057	71	0,1904	0,5838	0,0004
Hypoxanthine	Glucose	0,5967	71	0,4222	0,7286	<,0001
Hypoxanthine	Glutamate	0,4455	71	0,2369	0,6149	<,0001
Hypoxanthine	Glycerol	0,1237	71	-0,1129	0,3470	0,3041
Hypoxanthine	Glycine	0,5132	71	0,3180	0,6667	<,0001
Hypoxanthine	Histidine	0,7151	71	0,5783	0,8128	<,0001
Imidazole	1,3-Dihydroxyacetone	-0,0180	71	-0,2502	0,2162	0,8818
Imidazole	2-Phenylpropionate	0,3900	71	0,1724	0,5714	0,0008
Imidazole	3-Hydroxybutyrate	0,3539	71	0,1315	0,5424	0,0025
Imidazole	3-Hydroxyphenylacetate	0,5710	71	0,3896	0,7097	<,0001
Imidazole	3-Phenylpropionate	0,0147	71	-0,2193	0,2472	0,9030
Imidazole	4-Hydroxybutyrate	0,2438	71	0,0112	0,4515	0,0404
Imidazole	Acetate	0,4815	71	0,2796	0,6426	<,0001
Imidazole	Acetoacetate	0,4217	71	0,2089	0,5963	0,0002
Imidazole	Acetone	0,5092	71	0,3130	0,6636	<,0001
Imidazole	Adipate	0,3541	71	0,1317	0,5426	0,0024
Imidazole	Alanine	0,3917	71	0,1744	0,5727	0,0007
Imidazole	Allantoin	0,1688	71	-0,0672	0,3869	0,1594
Imidazole	Aspartate	0,0736	71	-0,1625	0,3017	0,5419
Imidazole	Benzoate	0,4007	71	0,1846	0,5798	0,0005
Imidazole	Butyrate	0,3513	71	0,1286	0,5403	0,0027
Imidazole	Cadaverine	-0,0390	71	-0,2699	0,1961	0,7466
Imidazole	Caffeine	0,0437	71	-0,1915	0,2742	0,7172
Imidazole	Carnitine	0,4794	71	0,2771	0,6410	<,0001
Imidazole	Choline	0,2209	71	-0,0131	0,4319	0,0641
Imidazole	Dimethylamine	0,2539	71	0,0219	0,4599	0,0327
Imidazole	Ethanol	0,2863	71	0,0568	0,4871	0,0155
Imidazole	Ferulate	0,6179	71	0,4494	0,7440	<,0001
Imidazole	Formate	0,4398	71	0,2302	0,6105	0,0001
Imidazole	Fumarate	0,3528	71	0,1302	0,5415	0,0025
Imidazole	Glucose	0,4719	71	0,2682	0,6353	<,0001
Imidazole	Glutamate	0,3295	71	0,1043	0,5227	0,0050
Imidazole	Glycerol	0,0664	71	-0,1695	0,2951	0,5821
Imidazole	Glycine	0,4152	71	0,2014	0,5912	0,0003
Imidazole	Histidine	0,6863	71	0,5393	0,7927	<,0001
Imidazole	Hypoxanthine	0,8451	71	0,7621	0,9008	<,0001
Isobutyrate	1,3-Dihydroxyacetone	0,4475	71	0,2392	0,6164	<,0001
Isobutyrate	2-Phenylpropionate	0,5294	71	0,3379	0,6789	<,0001
Isobutyrate	3-Hydroxybutyrate	0,6380	71	0,4755	0,7584	<,0001
Isobutyrate	3-Hydroxyphenylacetate	0,1331	71	-0,1034	0,3554	0,2683
Isobutyrate	3-Phenylpropionate	0,1038	71	-0,1327	0,3291	0,3891
Isobutyrate	4-Hydroxybutyrate	0,5073	71	0,3108	0,6623	<,0001
Isobutyrate	Acetate	0,2678	71	0,0368	0,4716	0,0240
Isobutyrate	Acetoacetate	0,5498	71	0,3631	0,6941	<,0001
Isobutyrate	Acetone	0,5038	71	0,3065	0,6596	<,0001
Isobutyrate	Adipate	0,1787	71	-0,0570	0,3955	0,1359
Isobutyrate	Alanine	0,5382	71	0,3487	0,6854	<,0001
Isobutyrate	Allantoin	0,0088	71	-0,2249	0,2416	0,9418
Isobutyrate	Aspartate	0,5990	71	0,4251	0,7303	<,0001
Isobutyrate	Benzoate	0,0401	71	-0,1950	0,2709	0,7396
Isobutyrate	Butyrate	0,1671	71	-0,0689	0,3854	0,1637
Isobutyrate	Cadaverine	0,4155	71	0,2017	0,5915	0,0003
Isobutyrate	Caffeine	0,0226	71	-0,2119	0,2545	0,8519
Isobutyrate	Carnitine	0,5911	71	0,4151	0,7245	<,0001
Isobutyrate	Choline	0,8143	71	0,7172	0,8803	<,0001
Isobutyrate	Dimethylamine	0,6060	71	0,4340	0,7353	<,0001
Isobutyrate	Ethanol	0,6838	71	0,5360	0,7909	<,0001
Isobutyrate	Ferulate	0,1524	71	-0,0839	0,3725	0,2045
Isobutyrate	Formate	0,0454	71	-0,1899	0,2758	0,7070
Isobutyrate	Fumarate	0,0508	71	-0,1846	0,2808	0,6737
Isobutyrate	Glucose	0,5995	71	0,4257	0,7306	<,0001
Isobutyrate	Glutamate	0,7047	71	0,5642	0,8056	<,0001
Isobutyrate	Glycerol	0,6924	71	0,5476	0,7970	<,0001
Isobutyrate	Glycine	0,6571	71	0,5005	0,7720	<,0001
Isobutyrate	Histidine	0,1715	71	-0,0644	0,3892	0,1528
Isobutyrate	Hypoxanthine	0,2556	71	0,0237	0,4614	0,0314
Isobutyrate	Imidazole	0,2262	71	-0,0075	0,4365	0,0578
Isoleucine	1,3-Dihydroxyacetone	0,4748	71	0,2716	0,6375	<,0001
Isoleucine	2-Phenylpropionate	0,7111	71	0,5728	0,8100	<,0001
Isoleucine	3-Hydroxybutyrate	0,8101	71	0,7112	0,8775	<,0001
Isoleucine	3-Hydroxyphenylacetate	0,3428	71	0,1190	0,5334	0,0034
Isoleucine	3-Phenylpropionate	-0,0221	71	-0,2541	0,2123	0,8547
Isoleucine	4-Hydroxybutyrate	0,8545	71	0,7758	0,9070	<,0001
Isoleucine	Acetate	0,3777	71	0,1583	0,5615	0,0012
Isoleucine	Acetoacetate	0,8172	71	0,7214	0,8823	<,0001
Isoleucine	Acetone	0,6727	71	0,5212	0,7831	<,0001
Isoleucine	Adipate	0,3946	71	0,1776	0,5750	0,0007
Isoleucine	Alanine	0,7773	71	0,6646	0,8555	<,0001
Isoleucine	Allantoin	-0,0983	71	-0,3242	0,1382	0,4148
Isoleucine	Aspartate	0,5735	71	0,3928	0,7116	<,0001
Isoleucine	Benzoate	0,1113	71	-0,1252	0,3359	0,3554
Isoleucine	Butyrate	0,3620	71	0,1406	0,5490	0,0019
Isoleucine	Cadaverine	0,6263	71	0,4603	0,7500	<,0001
Isoleucine	Caffeine	0,0155	71	-0,2186	0,2479	0,8981
Isoleucine	Carnitine	0,8182	71	0,7228	0,8829	<,0001
Isoleucine	Choline	0,7181	71	0,5823	0,8149	<,0001
Isoleucine	Dimethylamine	0,6211	71	0,4535	0,7462	<,0001
Isoleucine	Ethanol	0,9228	71	0,8786	0,9513	<,0001
Isoleucine	Ferulate	0,3216	71	0,0955	0,5162	0,0062
Isoleucine	Formate	0,3226	71	0,0966	0,5170	0,0061
Isoleucine	Fumarate	-0,0629	71	-0,2919	0,1729	0,6022
Isoleucine	Glucose	0,7864	71	0,6774	0,8616	<,0001
Isoleucine	Glutamate	0,8362	71	0,7491	0,8949	<,0001
Isoleucine	Glycerol	0,7893	71	0,6815	0,8636	<,0001
Isoleucine	Glycine	0,8566	71	0,7790	0,9084	<,0001
Isoleucine	Histidine	0,2444	71	0,0118	0,4520	0,0399
Isoleucine	Hypoxanthine	0,4070	71	0,1919	0,5848	0,0004
Isoleucine	Imidazole	0,2709	71	0,0402	0,4743	0,0223
Isoleucine	Isobutyrate	0,6546	71	0,4972	0,7702	<,0001
Isopropanol	1,3-Dihydroxyacetone	0,4015	71	0,1856	0,5804	0,0005
Isopropanol	2-Phenylpropionate	0,5185	71	0,3244	0,6707	<,0001
Isopropanol	3-Hydroxybutyrate	0,8801	71	0,8140	0,9238	<,0001
Isopropanol	3-Hydroxyphenylacetate	0,3606	71	0,1390	0,5479	0,0020
Isopropanol	3-Phenylpropionate	-0,0861	71	-0,3131	0,1502	0,4754
Isopropanol	4-Hydroxybutyrate	0,6284	71	0,4630	0,7515	<,0001
Isopropanol	Acetate	0,4390	71	0,2291	0,6098	0,0001
Isopropanol	Acetoacetate	0,7336	71	0,6036	0,8256	<,0001
Isopropanol	Acetone	0,7151	71	0,5783	0,8128	<,0001
Isopropanol	Adipate	0,5677	71	0,3854	0,7073	<,0001
Isopropanol	Alanine	0,7432	71	0,6168	0,8322	<,0001
Isopropanol	Allantoin	0,0234	71	-0,2111	0,2553	0,8467
Isopropanol	Aspartate	0,5164	71	0,3219	0,6691	<,0001
Isopropanol	Benzoate	0,1828	71	-0,0527	0,3991	0,1270
Isopropanol	Butyrate	0,5045	71	0,3074	0,6601	<,0001
Isopropanol	Cadaverine	0,3824	71	0,1637	0,5652	0,0010
Isopropanol	Caffeine	0,0207	71	-0,2136	0,2528	0,8640
Isopropanol	Carnitine	0,7394	71	0,6116	0,8296	<,0001
Isopropanol	Choline	0,5941	71	0,4189	0,7267	<,0001
Isopropanol	Dimethylamine	0,6697	71	0,5172	0,7810	<,0001
Isopropanol	Ethanol	0,8132	71	0,7157	0,8796	<,0001
Isopropanol	Ferulate	0,3261	71	0,1005	0,5199	0,0055
Isopropanol	Formate	0,2575	71	0,0257	0,4630	0,0302
Isopropanol	Fumarate	0,0788	71	-0,1574	0,3065	0,5135
Isopropanol	Glucose	0,6753	71	0,5247	0,7849	<,0001
Isopropanol	Glutamate	0,6008	71	0,4274	0,7316	<,0001
Isopropanol	Glycerol	0,5981	71	0,4240	0,7296	<,0001
Isopropanol	Glycine	0,7326	71	0,6023	0,8249	<,0001
Isopropanol	Histidine	0,3075	71	0,0800	0,5046	0,0091
Isopropanol	Hypoxanthine	0,4140	71	0,2001	0,5903	0,0003
Isopropanol	Imidazole	0,2835	71	0,0537	0,4847	0,0166
Isopropanol	Isobutyrate	0,5318	71	0,3408	0,6807	<,0001
Isopropanol	Isoleucine	0,7835	71	0,6733	0,8597	<,0001
Isovalerate	1,3-Dihydroxyacetone	0,2025	71	-0,0323	0,4162	0,0903
Isovalerate	2-Phenylpropionate	0,5684	71	0,3863	0,7078	<,0001
Isovalerate	3-Hydroxybutyrate	0,6894	71	0,5435	0,7949	<,0001
Isovalerate	3-Hydroxyphenylacetate	0,4409	71	0,2314	0,6113	0,0001
Isovalerate	3-Phenylpropionate	0,1140	71	-0,1226	0,3383	0,3440
Isovalerate	4-Hydroxybutyrate	0,5314	71	0,3403	0,6804	<,0001
Isovalerate	Acetate	0,6914	71	0,5462	0,7963	<,0001
Isovalerate	Acetoacetate	0,6790	71	0,5296	0,7876	<,0001
Isovalerate	Acetone	0,6202	71	0,4523	0,7456	<,0001
Isovalerate	Adipate	0,4325	71	0,2215	0,6048	0,0002
Isovalerate	Alanine	0,6221	71	0,4548	0,7470	<,0001
Isovalerate	Allantoin	0,0280	71	-0,2067	0,2596	0,8168
Isovalerate	Aspartate	0,3204	71	0,0941	0,5152	0,0064
Isovalerate	Benzoate	0,2826	71	0,0528	0,4840	0,0169
Isovalerate	Butyrate	0,4393	71	0,2296	0,6101	0,0001
Isovalerate	Cadaverine	0,2703	71	0,0395	0,4737	0,0226
Isovalerate	Caffeine	0,0992	71	-0,1372	0,3250	0,4103
Isovalerate	Carnitine	0,6742	71	0,5232	0,7842	<,0001
Isovalerate	Choline	0,5032	71	0,3058	0,6591	<,0001
Isovalerate	Dimethylamine	0,4331	71	0,2223	0,6053	0,0002
Isovalerate	Ethanol	0,7031	71	0,5620	0,8044	<,0001
Isovalerate	Ferulate	0,5715	71	0,3903	0,7101	<,0001
Isovalerate	Formate	0,3501	71	0,1272	0,5393	0,0028
Isovalerate	Fumarate	0,2054	71	-0,0294	0,4186	0,0858
Isovalerate	Glucose	0,6894	71	0,5435	0,7949	<,0001
Isovalerate	Glutamate	0,6612	71	0,5059	0,7749	<,0001
Isovalerate	Glycerol	0,4285	71	0,2169	0,6017	0,0002
Isovalerate	Glycine	0,6293	71	0,4641	0,7521	<,0001
Isovalerate	Histidine	0,4796	71	0,2773	0,6411	<,0001
Isovalerate	Hypoxanthine	0,6728	71	0,5213	0,7832	<,0001
Isovalerate	Imidazole	0,5705	71	0,3889	0,7094	<,0001
Isovalerate	Isobutyrate	0,4907	71	0,2907	0,6497	<,0001
Isovalerate	Isoleucine	0,7135	71	0,5761	0,8117	<,0001
Isovalerate	Isopropanol	0,6265	71	0,4605	0,7502	<,0001
Lactate	1,3-Dihydroxyacetone	0,0478	71	-0,1876	0,2780	0,6921
Lactate	2-Phenylpropionate	0,4601	71	0,2541	0,6262	<,0001
Lactate	3-Hydroxybutyrate	0,2736	71	0,0431	0,4765	0,0209
Lactate	3-Hydroxyphenylacetate	0,1522	71	-0,0840	0,3723	0,2050
Lactate	3-Phenylpropionate	0,0434	71	-0,1918	0,2739	0,7193
Lactate	4-Hydroxybutyrate	0,3656	71	0,1446	0,5518	0,0017
Lactate	Acetate	0,0257	71	-0,2088	0,2575	0,8315
Lactate	Acetoacetate	0,3887	71	0,1709	0,5703	0,0008
Lactate	Acetone	0,3403	71	0,1162	0,5314	0,0037
Lactate	Adipate	0,2181	71	-0,0160	0,4296	0,0676
Lactate	Alanine	0,6144	71	0,4449	0,7414	<,0001
Lactate	Allantoin	-0,0205	71	-0,2526	0,2139	0,8656
Lactate	Aspartate	0,1122	71	-0,1244	0,3367	0,3516
Lactate	Benzoate	-0,0191	71	-0,2513	0,2152	0,8744
Lactate	Butyrate	0,2209	71	-0,0131	0,4319	0,0642
Lactate	Cadaverine	0,7179	71	0,5820	0,8147	<,0001
Lactate	Caffeine	-0,0272	71	-0,2588	0,2074	0,8220
Lactate	Carnitine	0,2754	71	0,0449	0,4780	0,0201
Lactate	Choline	0,4275	71	0,2157	0,6009	0,0002
Lactate	Dimethylamine	0,1304	71	-0,1061	0,3530	0,2783
Lactate	Ethanol	0,3374	71	0,1129	0,5290	0,0040
Lactate	Ferulate	0,1566	71	-0,0796	0,3761	0,1922
Lactate	Formate	-0,0758	71	-0,3037	0,1604	0,5299
Lactate	Fumarate	-0,0500	71	-0,2801	0,1854	0,6787
Lactate	Glucose	0,3411	71	0,1171	0,5320	0,0036
Lactate	Glutamate	0,4098	71	0,1952	0,5870	0,0004
Lactate	Glycerol	0,2733	71	0,0427	0,4762	0,0211
Lactate	Glycine	0,3362	71	0,1116	0,5281	0,0042
Lactate	Histidine	0,0657	71	-0,1702	0,2945	0,5863
Lactate	Hypoxanthine	0,0913	71	-0,1451	0,3178	0,4491
Lactate	Imidazole	0,0359	71	-0,1991	0,2669	0,7666
Lactate	Isobutyrate	0,4954	71	0,2964	0,6532	<,0001
Lactate	Isoleucine	0,3903	71	0,1728	0,5716	0,0008
Lactate	Isopropanol	0,2867	71	0,0572	0,4874	0,0153
Lactate	Isovalerate	0,1002	71	-0,1363	0,3259	0,4057
Leucine	1,3-Dihydroxyacetone	-0,1378	71	-0,3596	0,0987	0,2517
Leucine	2-Phenylpropionate	0,6122	71	0,4420	0,7398	<,0001
Leucine	3-Hydroxybutyrate	0,4832	71	0,2816	0,6439	<,0001
Leucine	3-Hydroxyphenylacetate	0,3926	71	0,1753	0,5734	0,0007
Leucine	3-Phenylpropionate	-0,0771	71	-0,3049	0,1591	0,5229
Leucine	4-Hydroxybutyrate	0,6363	71	0,4733	0,7572	<,0001
Leucine	Acetate	0,2493	71	0,0170	0,4561	0,0360
Leucine	Acetoacetate	0,5828	71	0,4045	0,7184	<,0001
Leucine	Acetone	0,6649	71	0,5108	0,7776	<,0001
Leucine	Adipate	0,3643	71	0,1432	0,5508	0,0018
Leucine	Alanine	0,7571	71	0,6361	0,8417	<,0001
Leucine	Allantoin	-0,1251	71	-0,3482	0,1115	0,2987
Leucine	Aspartate	-0,0346	71	-0,2658	0,2003	0,7744
Leucine	Benzoate	0,2659	71	0,0347	0,4700	0,0250
Leucine	Butyrate	0,3663	71	0,1455	0,5524	0,0017
Leucine	Cadaverine	0,5737	71	0,3930	0,7117	<,0001
Leucine	Caffeine	-0,1264	71	-0,3494	0,1102	0,2935
Leucine	Carnitine	0,5362	71	0,3462	0,6840	<,0001
Leucine	Choline	0,1678	71	-0,0682	0,3860	0,1620
Leucine	Dimethylamine	0,1477	71	-0,0887	0,3683	0,2190
Leucine	Ethanol	0,5102	71	0,3143	0,6644	<,0001
Leucine	Ferulate	0,2873	71	0,0579	0,4879	0,0151
Leucine	Formate	0,2287	71	-0,0049	0,4386	0,0551
Leucine	Fumarate	-0,1113	71	-0,3359	0,1253	0,3556
Leucine	Glucose	0,5580	71	0,3734	0,7002	<,0001
Leucine	Glutamate	0,6959	71	0,5523	0,7994	<,0001
Leucine	Glycerol	0,2136	71	-0,0207	0,4257	0,0736
Leucine	Glycine	0,3801	71	0,1611	0,5635	0,0011
Leucine	Histidine	0,3226	71	0,0965	0,5170	0,0061
Leucine	Hypoxanthine	0,3309	71	0,1057	0,5237	0,0048
Leucine	Imidazole	0,2565	71	0,0247	0,4622	0,0308
Leucine	Isobutyrate	0,2755	71	0,0451	0,4781	0,0201
Leucine	Isoleucine	0,6253	71	0,4589	0,7493	<,0001
Leucine	Isopropanol	0,5510	71	0,3646	0,6950	<,0001
Leucine	Isovalerate	0,4839	71	0,2825	0,6444	<,0001
Leucine	Lactate	0,4671	71	0,2624	0,6316	<,0001
Lysine	1,3-Dihydroxyacetone	0,0753	71	-0,1608	0,3033	0,5323
Lysine	2-Phenylpropionate	0,5464	71	0,3589	0,6916	<,0001
Lysine	3-Hydroxybutyrate	0,4441	71	0,2351	0,6138	0,0001
Lysine	3-Hydroxyphenylacetate	0,1018	71	-0,1347	0,3273	0,3984
Lysine	3-Phenylpropionate	0,0662	71	-0,1697	0,2950	0,5832
Lysine	4-Hydroxybutyrate	0,7763	71	0,6632	0,8548	<,0001
Lysine	Acetate	0,0688	71	-0,1672	0,2974	0,5684
Lysine	Acetoacetate	0,5544	71	0,3688	0,6975	<,0001
Lysine	Acetone	0,4750	71	0,2718	0,6376	<,0001
Lysine	Adipate	0,1602	71	-0,0760	0,3793	0,1821
Lysine	Alanine	0,6559	71	0,4989	0,7712	<,0001
Lysine	Allantoin	-0,1590	71	-0,3783	0,0772	0,1854
Lysine	Aspartate	0,2107	71	-0,0238	0,4232	0,0777
Lysine	Benzoate	0,0140	71	-0,2200	0,2465	0,9074
Lysine	Butyrate	0,1758	71	-0,0599	0,3930	0,1424
Lysine	Cadaverine	0,9567	71	0,9313	0,9729	<,0001
Lysine	Caffeine	-0,0738	71	-0,3019	0,1623	0,5409
Lysine	Carnitine	0,4978	71	0,2992	0,6550	<,0001
Lysine	Choline	0,3969	71	0,1803	0,5768	0,0006
Lysine	Dimethylamine	0,1900	71	-0,0453	0,4054	0,1125
Lysine	Ethanol	0,5521	71	0,3660	0,6958	<,0001
Lysine	Ferulate	0,1053	71	-0,1312	0,3305	0,3821
Lysine	Formate	0,3420	71	0,1181	0,5328	0,0035
Lysine	Fumarate	-0,1676	71	-0,3858	0,0684	0,1625
Lysine	Glucose	0,4865	71	0,2856	0,6464	<,0001
Lysine	Glutamate	0,6490	71	0,4899	0,7663	<,0001
Lysine	Glycerol	0,4368	71	0,2266	0,6082	0,0001
Lysine	Glycine	0,4715	71	0,2676	0,6349	<,0001
Lysine	Histidine	0,0377	71	-0,1973	0,2686	0,7549
Lysine	Hypoxanthine	0,1290	71	-0,1075	0,3518	0,2835
Lysine	Imidazole	0,0965	71	-0,1400	0,3225	0,4235
Lysine	Isobutyrate	0,4402	71	0,2306	0,6108	0,0001
Lysine	Isoleucine	0,6809	71	0,5321	0,7889	<,0001
Lysine	Isopropanol	0,4416	71	0,2322	0,6118	0,0001
Lysine	Isovalerate	0,3848	71	0,1664	0,5672	0,0009
Lysine	Lactate	0,6936	71	0,5492	0,7978	<,0001
Lysine	Leucine	0,6160	71	0,4469	0,7426	<,0001
Maltose	1,3-Dihydroxyacetone	0,4336	71	0,2229	0,6057	0,0002
Maltose	2-Phenylpropionate	0,6596	71	0,5038	0,7738	<,0001
Maltose	3-Hydroxybutyrate	0,5341	71	0,3436	0,6824	<,0001
Maltose	3-Hydroxyphenylacetate	0,2641	71	0,0328	0,4685	0,0261
Maltose	3-Phenylpropionate	0,0394	71	-0,1957	0,2702	0,7446
Maltose	4-Hydroxybutyrate	0,6972	71	0,5540	0,8003	<,0001
Maltose	Acetate	0,2381	71	0,0051	0,4466	0,0455
Maltose	Acetoacetate	0,6054	71	0,4333	0,7349	<,0001
Maltose	Acetone	0,4833	71	0,2817	0,6440	<,0001
Maltose	Adipate	0,2389	71	0,0060	0,4473	0,0448
Maltose	Alanine	0,5808	71	0,4019	0,7169	<,0001
Maltose	Allantoin	-0,0338	71	-0,2651	0,2011	0,7794
Maltose	Aspartate	0,3456	71	0,1222	0,5357	0,0032
Maltose	Benzoate	0,0191	71	-0,2152	0,2513	0,8744
Maltose	Butyrate	0,2024	71	-0,0325	0,4160	0,0905
Maltose	Cadaverine	0,5359	71	0,3458	0,6837	<,0001
Maltose	Caffeine	0,0393	71	-0,1958	0,2701	0,7451
Maltose	Carnitine	0,6464	71	0,4864	0,7644	<,0001
Maltose	Choline	0,5819	71	0,4033	0,7177	<,0001
Maltose	Dimethylamine	0,3998	71	0,1836	0,5791	0,0006
Maltose	Ethanol	0,6845	71	0,5370	0,7914	<,0001
Maltose	Ferulate	0,2689	71	0,0380	0,4726	0,0233
Maltose	Formate	0,3998	71	0,1836	0,5791	0,0006
Maltose	Fumarate	-0,0243	71	-0,2561	0,2102	0,8406
Maltose	Glucose	0,6021	71	0,4291	0,7325	<,0001
Maltose	Glutamate	0,6223	71	0,4551	0,7471	<,0001
Maltose	Glycerol	0,6851	71	0,5378	0,7919	<,0001
Maltose	Glycine	0,7333	71	0,6031	0,8254	<,0001
Maltose	Histidine	0,1944	71	-0,0407	0,4092	0,1042
Maltose	Hypoxanthine	0,3187	71	0,0922	0,5138	0,0068
Maltose	Imidazole	0,2099	71	-0,0246	0,4226	0,0789
Maltose	Isobutyrate	0,4960	71	0,2970	0,6536	<,0001
Maltose	Isoleucine	0,8052	71	0,7042	0,8743	<,0001
Maltose	Isopropanol	0,4926	71	0,2930	0,6511	<,0001
Maltose	Isovalerate	0,5257	71	0,3332	0,6761	<,0001
Maltose	Lactate	0,3560	71	0,1338	0,5441	0,0023
Maltose	Leucine	0,4728	71	0,2692	0,6360	<,0001
Maltose	Lysine	0,5897	71	0,4133	0,7235	<,0001
Methanol	1,3-Dihydroxyacetone	0,8747	71	0,8059	0,9202	<,0001
Methanol	2-Phenylpropionate	0,4922	71	0,2925	0,6508	<,0001
Methanol	3-Hydroxybutyrate	0,7612	71	0,6419	0,8445	<,0001
Methanol	3-Hydroxyphenylacetate	0,2816	71	0,0517	0,4832	0,0173
Methanol	3-Phenylpropionate	-0,0587	71	-0,2880	0,1771	0,6270
Methanol	4-Hydroxybutyrate	0,5723	71	0,3913	0,7107	<,0001
Methanol	Acetate	0,2558	71	0,0239	0,4616	0,0313
Methanol	Acetoacetate	0,6082	71	0,4369	0,7369	<,0001
Methanol	Acetone	0,4632	71	0,2578	0,6286	<,0001
Methanol	Adipate	0,2574	71	0,0257	0,4629	0,0302
Methanol	Alanine	0,4884	71	0,2879	0,6479	<,0001
Methanol	Allantoin	0,0367	71	-0,1983	0,2678	0,7610
Methanol	Aspartate	0,8291	71	0,7387	0,8902	<,0001
Methanol	Benzoate	0,1326	71	-0,1039	0,3549	0,2704
Methanol	Butyrate	0,1987	71	-0,0363	0,4129	0,0967
Methanol	Cadaverine	0,2248	71	-0,0090	0,4353	0,0595
Methanol	Caffeine	0,0891	71	-0,1472	0,3159	0,4598
Methanol	Carnitine	0,7239	71	0,5903	0,8189	<,0001
Methanol	Choline	0,8035	71	0,7018	0,8732	<,0001
Methanol	Dimethylamine	0,8252	71	0,7330	0,8876	<,0001
Methanol	Ethanol	0,7818	71	0,6708	0,8585	<,0001
Methanol	Ferulate	0,2572	71	0,0254	0,4627	0,0304
Methanol	Formate	0,1695	71	-0,0664	0,3875	0,1575
Methanol	Fumarate	0,0951	71	-0,1413	0,3213	0,4301
Methanol	Glucose	0,6491	71	0,4899	0,7663	<,0001
Methanol	Glutamate	0,5129	71	0,3176	0,6665	<,0001
Methanol	Glycerol	0,8944	71	0,8354	0,9330	<,0001
Methanol	Glycine	0,9307	71	0,8908	0,9563	<,0001
Methanol	Histidine	0,2545	71	0,0225	0,4604	0,0322
Methanol	Hypoxanthine	0,3365	71	0,1120	0,5283	0,0041
Methanol	Imidazole	0,2625	71	0,0311	0,4672	0,0270
Methanol	Isobutyrate	0,6120	71	0,4418	0,7397	<,0001
Methanol	Isoleucine	0,7358	71	0,6067	0,8271	<,0001
Methanol	Isopropanol	0,6378	71	0,4752	0,7582	<,0001
Methanol	Isovalerate	0,4737	71	0,2703	0,6367	<,0001
Methanol	Lactate	0,1516	71	-0,0847	0,3717	0,2071
Methanol	Leucine	0,1491	71	-0,0872	0,3696	0,2145
Methanol	Lysine	0,2846	71	0,0549	0,4856	0,0162
Methanol	Maltose	0,5995	71	0,4258	0,7306	<,0001
Methylamine	1,3-Dihydroxyacetone	0,4848	71	0,2835	0,6451	<,0001
Methylamine	2-Phenylpropionate	0,5090	71	0,3129	0,6635	<,0001
Methylamine	3-Hydroxybutyrate	0,6532	71	0,4954	0,7693	<,0001
Methylamine	3-Hydroxyphenylacetate	0,4358	71	0,2254	0,6073	0,0001
Methylamine	3-Phenylpropionate	-0,0061	71	-0,2391	0,2275	0,9597
Methylamine	4-Hydroxybutyrate	0,3320	71	0,1070	0,5247	0,0047
Methylamine	Acetate	0,4088	71	0,1940	0,5862	0,0004
Methylamine	Acetoacetate	0,5802	71	0,4012	0,7165	<,0001
Methylamine	Acetone	0,5265	71	0,3343	0,6767	<,0001
Methylamine	Adipate	0,5553	71	0,3699	0,6981	<,0001
Methylamine	Alanine	0,6541	71	0,4966	0,7699	<,0001
Methylamine	Allantoin	0,0732	71	-0,1629	0,3013	0,5442
Methylamine	Aspartate	0,5164	71	0,3218	0,6691	<,0001
Methylamine	Benzoate	0,2163	71	-0,0179	0,4280	0,0700
Methylamine	Butyrate	0,5307	71	0,3395	0,6799	<,0001
Methylamine	Cadaverine	0,1717	71	-0,0641	0,3894	0,1521
Methylamine	Caffeine	0,0254	71	-0,2092	0,2571	0,8338
Methylamine	Carnitine	0,5834	71	0,4053	0,7189	<,0001
Methylamine	Choline	0,5437	71	0,3555	0,6896	<,0001
Methylamine	Dimethylamine	0,7020	71	0,5605	0,8037	<,0001
Methylamine	Ethanol	0,6395	71	0,4774	0,7595	<,0001
Methylamine	Ferulate	0,3542	71	0,1318	0,5427	0,0024
Methylamine	Formate	-0,0602	71	-0,2895	0,1756	0,6179
Methylamine	Fumarate	0,1093	71	-0,1272	0,3341	0,3640
Methylamine	Glucose	0,6046	71	0,4322	0,7343	<,0001
Methylamine	Glutamate	0,4714	71	0,2675	0,6349	<,0001
Methylamine	Glycerol	0,5267	71	0,3346	0,6769	<,0001
Methylamine	Glycine	0,6531	71	0,4952	0,7692	<,0001
Methylamine	Histidine	0,3551	71	0,1328	0,5434	0,0024
Methylamine	Hypoxanthine	0,3800	71	0,1610	0,5634	0,0011
Methylamine	Imidazole	0,2399	71	0,0070	0,4482	0,0439
Methylamine	Isobutyrate	0,4483	71	0,2401	0,6171	<,0001
Methylamine	Isoleucine	0,5949	71	0,4199	0,7273	<,0001
Methylamine	Isopropanol	0,6595	71	0,5036	0,7737	<,0001
Methylamine	Isovalerate	0,4550	71	0,2481	0,6223	<,0001
Methylamine	Lactate	0,2731	71	0,0425	0,4761	0,0212
Methylamine	Leucine	0,4258	71	0,2137	0,5996	0,0002
Methylamine	Lysine	0,2306	71	-0,0028	0,4402	0,0530
Methylamine	Maltose	0,3919	71	0,1746	0,5728	0,0007
Methylamine	Methanol	0,6224	71	0,4552	0,7472	<,0001
Nicotinate	1,3-Dihydroxyacetone	0,0962	71	-0,1403	0,3222	0,4251
Nicotinate	2-Phenylpropionate	0,4284	71	0,2168	0,6016	0,0002
Nicotinate	3-Hydroxybutyrate	0,3771	71	0,1577	0,5611	0,0012
Nicotinate	3-Hydroxyphenylacetate	0,5800	71	0,4010	0,7164	<,0001
Nicotinate	3-Phenylpropionate	-0,1300	71	-0,3526	0,1066	0,2801
Nicotinate	4-Hydroxybutyrate	0,2037	71	-0,0311	0,4172	0,0884
Nicotinate	Acetate	0,4833	71	0,2818	0,6440	<,0001
Nicotinate	Acetoacetate	0,5870	71	0,4099	0,7215	<,0001
Nicotinate	Acetone	0,4458	71	0,2372	0,6151	<,0001
Nicotinate	Adipate	0,3868	71	0,1687	0,5688	0,0009
Nicotinate	Alanine	0,4100	71	0,1954	0,5871	0,0004
Nicotinate	Allantoin	0,3590	71	0,1372	0,5466	0,0021
Nicotinate	Aspartate	0,1213	71	-0,1153	0,3448	0,3138
Nicotinate	Benzoate	0,2636	71	0,0323	0,4681	0,0263
Nicotinate	Butyrate	0,4008	71	0,1848	0,5799	0,0005
Nicotinate	Cadaverine	-0,0809	71	-0,3084	0,1553	0,5024
Nicotinate	Caffeine	0,1689	71	-0,0671	0,3869	0,1592
Nicotinate	Carnitine	0,5233	71	0,3303	0,6743	<,0001
Nicotinate	Choline	0,3060	71	0,0783	0,5034	0,0095
Nicotinate	Dimethylamine	0,2878	71	0,0585	0,4884	0,0149
Nicotinate	Ethanol	0,3479	71	0,1247	0,5376	0,0029
Nicotinate	Ferulate	0,6563	71	0,4994	0,7715	<,0001
Nicotinate	Formate	0,3844	71	0,1660	0,5669	0,0009
Nicotinate	Fumarate	0,5143	71	0,3194	0,6675	<,0001
Nicotinate	Glucose	0,4953	71	0,2962	0,6531	<,0001
Nicotinate	Glutamate	0,3635	71	0,1423	0,5502	0,0018
Nicotinate	Glycerol	0,1280	71	-0,1086	0,3508	0,2876
Nicotinate	Glycine	0,4673	71	0,2626	0,6317	<,0001
Nicotinate	Histidine	0,6311	71	0,4664	0,7534	<,0001
Nicotinate	Hypoxanthine	0,9273	71	0,8857	0,9542	<,0001
Nicotinate	Imidazole	0,8037	71	0,7021	0,8733	<,0001
Nicotinate	Isobutyrate	0,2316	71	-0,0018	0,4410	0,0520
Nicotinate	Isoleucine	0,3213	71	0,0951	0,5159	0,0063
Nicotinate	Isopropanol	0,3182	71	0,0917	0,5134	0,0069
Nicotinate	Isovalerate	0,6152	71	0,4459	0,7420	<,0001
Nicotinate	Lactate	0,0167	71	-0,2174	0,2490	0,8900
Nicotinate	Leucine	0,1932	71	-0,0420	0,4081	0,1065
Nicotinate	Lysine	0,0466	71	-0,1888	0,2769	0,6998
Nicotinate	Maltose	0,2652	71	0,0340	0,4695	0,0254
Nicotinate	Methanol	0,3315	71	0,1064	0,5243	0,0047
Nicotinate	Methylamine	0,3226	71	0,0966	0,5170	0,0061
N-nitrosodimethylamine	1,3-Dihydroxyacetone	0,5340	71	0,3435	0,6823	<,0001
N-nitrosodimethylamine	2-Phenylpropionate	0,6246	71	0,4580	0,7488	<,0001
N-nitrosodimethylamine	3-Hydroxybutyrate	0,8019	71	0,6994	0,8720	<,0001
N-nitrosodimethylamine	3-Hydroxyphenylacetate	0,3925	71	0,1752	0,5733	0,0007
N-nitrosodimethylamine	3-Phenylpropionate	-0,1415	71	-0,3629	0,0949	0,2390
N-nitrosodimethylamine	4-Hydroxybutyrate	0,6904	71	0,5449	0,7956	<,0001
N-nitrosodimethylamine	Acetate	0,3088	71	0,0814	0,5057	0,0088
N-nitrosodimethylamine	Acetoacetate	0,8469	71	0,7647	0,9020	<,0001
N-nitrosodimethylamine	Acetone	0,6421	71	0,4808	0,7614	<,0001
N-nitrosodimethylamine	Adipate	0,2679	71	0,0369	0,4718	0,0239
N-nitrosodimethylamine	Alanine	0,6211	71	0,4535	0,7463	<,0001
N-nitrosodimethylamine	Allantoin	0,0385	71	-0,1966	0,2694	0,7499
N-nitrosodimethylamine	Aspartate	0,6112	71	0,4407	0,7391	<,0001
N-nitrosodimethylamine	Benzoate	0,2611	71	0,0296	0,4660	0,0278
N-nitrosodimethylamine	Butyrate	0,2516	71	0,0194	0,4580	0,0343
N-nitrosodimethylamine	Cadaverine	0,3686	71	0,1480	0,5542	0,0016
N-nitrosodimethylamine	Caffeine	0,1042	71	-0,1324	0,3295	0,3874
N-nitrosodimethylamine	Carnitine	0,8120	71	0,7139	0,8788	<,0001
N-nitrosodimethylamine	Choline	0,6451	71	0,4848	0,7635	<,0001
N-nitrosodimethylamine	Dimethylamine	0,7159	71	0,5793	0,8133	<,0001
N-nitrosodimethylamine	Ethanol	0,8328	71	0,7440	0,8927	<,0001
N-nitrosodimethylamine	Ferulate	0,2992	71	0,0709	0,4978	0,0113
N-nitrosodimethylamine	Formate	0,1770	71	-0,0587	0,3940	0,1398
N-nitrosodimethylamine	Fumarate	0,0182	71	-0,2161	0,2504	0,8805
N-nitrosodimethylamine	Glucose	0,7101	71	0,5714	0,8093	<,0001
N-nitrosodimethylamine	Glutamate	0,6802	71	0,5312	0,7884	<,0001
N-nitrosodimethylamine	Glycerol	0,6984	71	0,5556	0,8011	<,0001
N-nitrosodimethylamine	Glycine	0,7750	71	0,6612	0,8539	<,0001
N-nitrosodimethylamine	Histidine	0,3256	71	0,0998	0,5194	0,0056
N-nitrosodimethylamine	Hypoxanthine	0,4104	71	0,1958	0,5874	0,0004
N-nitrosodimethylamine	Imidazole	0,2692	71	0,0383	0,4728	0,0232
N-nitrosodimethylamine	Isobutyrate	0,5087	71	0,3124	0,6633	<,0001
N-nitrosodimethylamine	Isoleucine	0,7889	71	0,6810	0,8633	<,0001
N-nitrosodimethylamine	Isopropanol	0,7143	71	0,5772	0,8122	<,0001
N-nitrosodimethylamine	Isovalerate	0,5310	71	0,3398	0,6801	<,0001
N-nitrosodimethylamine	Lactate	0,2305	71	-0,0030	0,4401	0,0532
N-nitrosodimethylamine	Leucine	0,5435	71	0,3553	0,6894	<,0001
N-nitrosodimethylamine	Lysine	0,4335	71	0,2227	0,6056	0,0002
N-nitrosodimethylamine	Maltose	0,5234	71	0,3305	0,6744	<,0001
N-nitrosodimethylamine	Methanol	0,7445	71	0,6187	0,8331	<,0001
N-nitrosodimethylamine	Methylamine	0,6245	71	0,4579	0,7487	<,0001
N-nitrosodimethylamine	Nicotinate	0,3438	71	0,1202	0,5343	0,0033
N-Phenylacetylglycine	1,3-Dihydroxyacetone	0,0048	71	-0,2288	0,2378	0,9683
N-Phenylacetylglycine	2-Phenylpropionate	0,5328	71	0,3420	0,6814	<,0001
N-Phenylacetylglycine	3-Hydroxybutyrate	0,3172	71	0,0906	0,5126	0,0070
N-Phenylacetylglycine	3-Hydroxyphenylacetate	0,8737	71	0,8044	0,9196	<,0001
N-Phenylacetylglycine	3-Phenylpropionate	-0,0074	71	-0,2403	0,2263	0,9511
N-Phenylacetylglycine	4-Hydroxybutyrate	0,2127	71	-0,0217	0,4249	0,0749
N-Phenylacetylglycine	Acetate	0,4750	71	0,2718	0,6376	<,0001
N-Phenylacetylglycine	Acetoacetate	0,4175	71	0,2041	0,5930	0,0003
N-Phenylacetylglycine	Acetone	0,6001	71	0,4264	0,7310	<,0001
N-Phenylacetylglycine	Adipate	0,4925	71	0,2928	0,6510	<,0001
N-Phenylacetylglycine	Alanine	0,6320	71	0,4677	0,7541	<,0001
N-Phenylacetylglycine	Allantoin	0,1598	71	-0,0764	0,3789	0,1833
N-Phenylacetylglycine	Aspartate	-0,0308	71	-0,2622	0,2040	0,7988
N-Phenylacetylglycine	Benzoate	0,6277	71	0,4621	0,7510	<,0001
N-Phenylacetylglycine	Butyrate	0,4640	71	0,2587	0,6292	<,0001
N-Phenylacetylglycine	Cadaverine	0,2723	71	0,0416	0,4754	0,0216
N-Phenylacetylglycine	Caffeine	0,1497	71	-0,0867	0,3700	0,2129
N-Phenylacetylglycine	Carnitine	0,4014	71	0,1855	0,5804	0,0005
N-Phenylacetylglycine	Choline	0,2131	71	-0,0213	0,4252	0,0744
N-Phenylacetylglycine	Dimethylamine	0,1373	71	-0,0992	0,3591	0,2537
N-Phenylacetylglycine	Ethanol	0,3394	71	0,1152	0,5307	0,0038
N-Phenylacetylglycine	Ferulate	0,8858	71	0,8225	0,9274	<,0001
N-Phenylacetylglycine	Formate	0,0549	71	-0,1807	0,2846	0,6493
N-Phenylacetylglycine	Fumarate	0,3617	71	0,1402	0,5487	0,0019
N-Phenylacetylglycine	Glucose	0,5255	71	0,3330	0,6759	<,0001
N-Phenylacetylglycine	Glutamate	0,3896	71	0,1719	0,5710	0,0008
N-Phenylacetylglycine	Glycerol	0,0728	71	-0,1632	0,3010	0,5460
N-Phenylacetylglycine	Glycine	0,4596	71	0,2535	0,6258	<,0001
N-Phenylacetylglycine	Histidine	0,7492	71	0,6251	0,8363	<,0001
N-Phenylacetylglycine	Hypoxanthine	0,6184	71	0,4500	0,7443	<,0001
N-Phenylacetylglycine	Imidazole	0,5352	71	0,3449	0,6832	<,0001
N-Phenylacetylglycine	Isobutyrate	0,2311	71	-0,0023	0,4406	0,0525
N-Phenylacetylglycine	Isoleucine	0,4073	71	0,1923	0,5850	0,0004
N-Phenylacetylglycine	Isopropanol	0,3933	71	0,1762	0,5740	0,0007
N-Phenylacetylglycine	Isovalerate	0,4806	71	0,2785	0,6419	<,0001
N-Phenylacetylglycine	Lactate	0,3757	71	0,1560	0,5599	0,0012
N-Phenylacetylglycine	Leucine	0,4788	71	0,2764	0,6405	<,0001
N-Phenylacetylglycine	Lysine	0,2874	71	0,0580	0,4880	0,0151
N-Phenylacetylglycine	Maltose	0,3449	71	0,1213	0,5351	0,0032
N-Phenylacetylglycine	Methanol	0,2624	71	0,0310	0,4671	0,0271
N-Phenylacetylglycine	Methylamine	0,4228	71	0,2103	0,5972	0,0002
N-Phenylacetylglycine	Nicotinate	0,5096	71	0,3136	0,6640	<,0001
N-Phenylacetylglycine	N-nitrosodimethylamine	0,3110	71	0,0838	0,5075	0,0083
Ornithine	1,3-Dihydroxyacetone	0,5079	71	0,3115	0,6627	<,0001
Ornithine	2-Phenylpropionate	0,5812	71	0,4025	0,7172	<,0001
Ornithine	3-Hydroxybutyrate	0,8318	71	0,7426	0,8920	<,0001
Ornithine	3-Hydroxyphenylacetate	0,4227	71	0,2101	0,5971	0,0002
Ornithine	3-Phenylpropionate	-0,1407	71	-0,3622	0,0957	0,2417
Ornithine	4-Hydroxybutyrate	0,7488	71	0,6247	0,8361	<,0001
Ornithine	Acetate	0,3227	71	0,0967	0,5171	0,0060
Ornithine	Acetoacetate	0,8113	71	0,7129	0,8783	<,0001
Ornithine	Acetone	0,7066	71	0,5668	0,8069	<,0001
Ornithine	Adipate	0,3440	71	0,1203	0,5344	0,0033
Ornithine	Alanine	0,7320	71	0,6014	0,8245	<,0001
Ornithine	Allantoin	0,0057	71	-0,2279	0,2387	0,9622
Ornithine	Aspartate	0,5903	71	0,4140	0,7239	<,0001
Ornithine	Benzoate	0,2817	71	0,0518	0,4832	0,0173
Ornithine	Butyrate	0,3162	71	0,0895	0,5117	0,0072
Ornithine	Cadaverine	0,5154	71	0,3206	0,6683	<,0001
Ornithine	Caffeine	0,0447	71	-0,1906	0,2752	0,7111
Ornithine	Carnitine	0,8031	71	0,7012	0,8729	<,0001
Ornithine	Choline	0,6311	71	0,4665	0,7535	<,0001
Ornithine	Dimethylamine	0,6748	71	0,5240	0,7846	<,0001
Ornithine	Ethanol	0,8176	71	0,7220	0,8825	<,0001
Ornithine	Ferulate	0,3903	71	0,1727	0,5715	0,0008
Ornithine	Formate	0,2895	71	0,0603	0,4898	0,0143
Ornithine	Fumarate	0,1242	71	-0,1123	0,3475	0,3019
Ornithine	Glucose	0,7267	71	0,5942	0,8209	<,0001
Ornithine	Glutamate	0,6857	71	0,5386	0,7923	<,0001
Ornithine	Glycerol	0,6956	71	0,5519	0,7992	<,0001
Ornithine	Glycine	0,8307	71	0,7410	0,8913	<,0001
Ornithine	Histidine	0,3760	71	0,1564	0,5602	0,0012
Ornithine	Hypoxanthine	0,4687	71	0,2644	0,6328	<,0001
Ornithine	Imidazole	0,3467	71	0,1234	0,5366	0,0031
Ornithine	Isobutyrate	0,5125	71	0,3171	0,6661	<,0001
Ornithine	Isoleucine	0,8170	71	0,7211	0,8821	<,0001
Ornithine	Isopropanol	0,7848	71	0,6751	0,8606	<,0001
Ornithine	Isovalerate	0,6165	71	0,4475	0,7429	<,0001
Ornithine	Lactate	0,3425	71	0,1186	0,5332	0,0035
Ornithine	Leucine	0,5502	71	0,3636	0,6944	<,0001
Ornithine	Lysine	0,5875	71	0,4104	0,7218	<,0001
Ornithine	Maltose	0,5742	71	0,3936	0,7121	<,0001
Ornithine	Methanol	0,7595	71	0,6395	0,8434	<,0001
Ornithine	Methylamine	0,5990	71	0,4251	0,7303	<,0001
Ornithine	Nicotinate	0,4046	71	0,1891	0,5829	0,0005
Ornithine	N-nitrosodimethylamine	0,8436	71	0,7599	0,8998	<,0001
Ornithine	N-Phenylacetylglycine	0,4262	71	0,2142	0,5999	0,0002
Phenylacetate	1,3-Dihydroxyacetone	0,4291	71	0,2176	0,6022	0,0002
Phenylacetate	2-Phenylpropionate	0,7001	71	0,5579	0,8023	<,0001
Phenylacetate	3-Hydroxybutyrate	0,5698	71	0,3881	0,7089	<,0001
Phenylacetate	3-Hydroxyphenylacetate	0,5670	71	0,3846	0,7068	<,0001
Phenylacetate	3-Phenylpropionate	0,0472	71	-0,1882	0,2774	0,6960
Phenylacetate	4-Hydroxybutyrate	0,5858	71	0,4083	0,7206	<,0001
Phenylacetate	Acetate	0,4512	71	0,2435	0,6193	<,0001
Phenylacetate	Acetoacetate	0,6470	71	0,4872	0,7648	<,0001
Phenylacetate	Acetone	0,6148	71	0,4454	0,7417	<,0001
Phenylacetate	Adipate	0,3353	71	0,1107	0,5274	0,0043
Phenylacetate	Alanine	0,6809	71	0,5322	0,7889	<,0001
Phenylacetate	Allantoin	0,0293	71	-0,2055	0,2608	0,8087
Phenylacetate	Aspartate	0,3936	71	0,1765	0,5742	0,0007
Phenylacetate	Benzoate	0,3878	71	0,1699	0,5696	0,0008
Phenylacetate	Butyrate	0,3189	71	0,0925	0,5140	0,0067
Phenylacetate	Cadaverine	0,4584	71	0,2521	0,6249	<,0001
Phenylacetate	Caffeine	0,0865	71	-0,1498	0,3135	0,4732
Phenylacetate	Carnitine	0,7033	71	0,5622	0,8046	<,0001
Phenylacetate	Choline	0,5676	71	0,3854	0,7073	<,0001
Phenylacetate	Dimethylamine	0,4324	71	0,2214	0,6047	0,0002
Phenylacetate	Ethanol	0,6741	71	0,5230	0,7841	<,0001
Phenylacetate	Ferulate	0,6277	71	0,4621	0,7510	<,0001
Phenylacetate	Formate	0,1729	71	-0,0629	0,3905	0,1493
Phenylacetate	Fumarate	0,1363	71	-0,1002	0,3582	0,2569
Phenylacetate	Glucose	0,7830	71	0,6726	0,8593	<,0001
Phenylacetate	Glutamate	0,6590	71	0,5030	0,7734	<,0001
Phenylacetate	Glycerol	0,5783	71	0,3988	0,7151	<,0001
Phenylacetate	Glycine	0,8086	71	0,7091	0,8766	<,0001
Phenylacetate	Histidine	0,5445	71	0,3565	0,6901	<,0001
Phenylacetate	Hypoxanthine	0,5683	71	0,3862	0,7077	<,0001
Phenylacetate	Imidazole	0,4935	71	0,2941	0,6518	<,0001
Phenylacetate	Isobutyrate	0,4861	71	0,2852	0,6461	<,0001
Phenylacetate	Isoleucine	0,7484	71	0,6241	0,8358	<,0001
Phenylacetate	Isopropanol	0,5151	71	0,3203	0,6682	<,0001
Phenylacetate	Isovalerate	0,6987	71	0,5561	0,8014	<,0001
Phenylacetate	Lactate	0,3624	71	0,1410	0,5493	0,0019
Phenylacetate	Leucine	0,4700	71	0,2658	0,6338	<,0001
Phenylacetate	Lysine	0,5191	71	0,3252	0,6711	<,0001
Phenylacetate	Maltose	0,6649	71	0,5108	0,7776	<,0001
Phenylacetate	Methanol	0,6762	71	0,5259	0,7856	<,0001
Phenylacetate	Methylamine	0,5477	71	0,3605	0,6925	<,0001
Phenylacetate	Nicotinate	0,5207	71	0,3271	0,6723	<,0001
Phenylacetate	N-nitrosodimethylamine	0,6106	71	0,4400	0,7387	<,0001
Phenylacetate	N-Phenylacetylglycine	0,6723	71	0,5206	0,7828	<,0001
Phenylacetate	Ornithine	0,6894	71	0,5436	0,7949	<,0001
Phenylalanine	1,3-Dihydroxyacetone	-0,0807	71	-0,3082	0,1555	0,5033
Phenylalanine	2-Phenylpropionate	0,4407	71	0,2312	0,6112	0,0001
Phenylalanine	3-Hydroxybutyrate	0,2966	71	0,0680	0,4956	0,0120
Phenylalanine	3-Hydroxyphenylacetate	0,7028	71	0,5616	0,8043	<,0001
Phenylalanine	3-Phenylpropionate	0,1084	71	-0,1282	0,3333	0,3683
Phenylalanine	4-Hydroxybutyrate	0,1982	71	-0,0368	0,4124	0,0975
Phenylalanine	Acetate	0,4201	71	0,2071	0,5951	0,0003
Phenylalanine	Acetoacetate	0,4491	71	0,2411	0,6177	<,0001
Phenylalanine	Acetone	0,5765	71	0,3965	0,7138	<,0001
Phenylalanine	Adipate	0,3981	71	0,1817	0,5778	0,0006
Phenylalanine	Alanine	0,5400	71	0,3508	0,6867	<,0001
Phenylalanine	Allantoin	0,2415	71	0,0087	0,4495	0,0425
Phenylalanine	Aspartate	-0,0989	71	-0,3248	0,1375	0,4117
Phenylalanine	Benzoate	0,6196	71	0,4516	0,7452	<,0001
Phenylalanine	Butyrate	0,3911	71	0,1737	0,5722	0,0007
Phenylalanine	Cadaverine	0,3235	71	0,0976	0,5177	0,0059
Phenylalanine	Caffeine	0,2827	71	0,0529	0,4841	0,0169
Phenylalanine	Carnitine	0,4022	71	0,1864	0,5810	0,0005
Phenylalanine	Choline	0,1887	71	-0,0466	0,4042	0,1150
Phenylalanine	Dimethylamine	0,1242	71	-0,1124	0,3474	0,3022
Phenylalanine	Ethanol	0,2949	71	0,0662	0,4942	0,0125
Phenylalanine	Ferulate	0,7141	71	0,5769	0,8121	<,0001
Phenylalanine	Formate	0,1412	71	-0,0953	0,3625	0,2403
Phenylalanine	Fumarate	0,4489	71	0,2408	0,6175	<,0001
Phenylalanine	Glucose	0,4398	71	0,2301	0,6104	0,0001
Phenylalanine	Glutamate	0,3415	71	0,1176	0,5324	0,0036
Phenylalanine	Glycerol	0,0182	71	-0,2160	0,2504	0,8804
Phenylalanine	Glycine	0,3370	71	0,1126	0,5287	0,0041
Phenylalanine	Histidine	0,7428	71	0,6163	0,8320	<,0001
Phenylalanine	Hypoxanthine	0,5591	71	0,3747	0,7010	<,0001
Phenylalanine	Imidazole	0,4661	71	0,2612	0,6308	<,0001
Phenylalanine	Isobutyrate	0,2598	71	0,0282	0,4649	0,0287
Phenylalanine	Isoleucine	0,3286	71	0,1032	0,5219	0,0051
Phenylalanine	Isopropanol	0,3891	71	0,1714	0,5706	0,0008
Phenylalanine	Isovalerate	0,4173	71	0,2038	0,5929	0,0003
Phenylalanine	Lactate	0,4468	71	0,2384	0,6159	<,0001
Phenylalanine	Leucine	0,5188	71	0,3248	0,6709	<,0001
Phenylalanine	Lysine	0,3666	71	0,1457	0,5526	0,0017
Phenylalanine	Maltose	0,3422	71	0,1183	0,5329	0,0035
Phenylalanine	Methanol	0,1361	71	-0,1004	0,3580	0,2579
Phenylalanine	Methylamine	0,3769	71	0,1574	0,5609	0,0012
Phenylalanine	Nicotinate	0,4142	71	0,2003	0,5905	0,0003
Phenylalanine	N-nitrosodimethylamine	0,3459	71	0,1225	0,5360	0,0031
Phenylalanine	N-Phenylacetylglycine	0,7886	71	0,6805	0,8631	<,0001
Phenylalanine	Ornithine	0,4074	71	0,1923	0,5851	0,0004
Phenylalanine	Phenylacetate	0,4934	71	0,2939	0,6517	<,0001
Pimelate	1,3-Dihydroxyacetone	-0,1148	71	-0,3390	0,1218	0,3405
Pimelate	2-Phenylpropionate	0,5086	71	0,3123	0,6632	<,0001
Pimelate	3-Hydroxybutyrate	0,4244	71	0,2121	0,5984	0,0002
Pimelate	3-Hydroxyphenylacetate	0,4325	71	0,2216	0,6048	0,0002
Pimelate	3-Phenylpropionate	-0,0347	71	-0,2658	0,2003	0,7741
Pimelate	4-Hydroxybutyrate	0,4354	71	0,2250	0,6071	0,0001
Pimelate	Acetate	0,2422	71	0,0094	0,4500	0,0419
Pimelate	Acetoacetate	0,4481	71	0,2399	0,6169	<,0001
Pimelate	Acetone	0,5450	71	0,3571	0,6905	<,0001
Pimelate	Adipate	0,5938	71	0,4185	0,7265	<,0001
Pimelate	Alanine	0,6919	71	0,5468	0,7966	<,0001
Pimelate	Allantoin	-0,1534	71	-0,3734	0,0828	0,2014
Pimelate	Aspartate	-0,0718	71	-0,3001	0,1642	0,5517
Pimelate	Benzoate	0,1924	71	-0,0429	0,4074	0,1080
Pimelate	Butyrate	0,6125	71	0,4425	0,7401	<,0001
Pimelate	Cadaverine	0,3324	71	0,1074	0,5250	0,0046
Pimelate	Caffeine	-0,0079	71	-0,2408	0,2258	0,9478
Pimelate	Carnitine	0,3973	71	0,1808	0,5771	0,0006
Pimelate	Choline	0,0648	71	-0,1711	0,2936	0,5915
Pimelate	Dimethylamine	0,1465	71	-0,0899	0,3672	0,2228
Pimelate	Ethanol	0,3537	71	0,1313	0,5423	0,0025
Pimelate	Ferulate	0,3027	71	0,0747	0,5007	0,0103
Pimelate	Formate	0,2440	71	0,0113	0,4516	0,0403
Pimelate	Fumarate	-0,1298	71	-0,3525	0,1067	0,2805
Pimelate	Glucose	0,3323	71	0,1073	0,5249	0,0046
Pimelate	Glutamate	0,4147	71	0,2008	0,5908	0,0003
Pimelate	Glycerol	0,1024	71	-0,1341	0,3279	0,3954
Pimelate	Glycine	0,2980	71	0,0695	0,4967	0,0116
Pimelate	Histidine	0,2110	71	-0,0234	0,4235	0,0773
Pimelate	Hypoxanthine	0,3367	71	0,1122	0,5285	0,0041
Pimelate	Imidazole	0,2272	71	-0,0065	0,4373	0,0567
Pimelate	Isobutyrate	0,1075	71	-0,1290	0,3325	0,3722
Pimelate	Isoleucine	0,4386	71	0,2287	0,6095	0,0001
Pimelate	Isopropanol	0,5092	71	0,3131	0,6637	<,0001
Pimelate	Isovalerate	0,3971	71	0,1805	0,5770	0,0006
Pimelate	Lactate	0,3016	71	0,0735	0,4997	0,0106
Pimelate	Leucine	0,7005	71	0,5585	0,8026	<,0001
Pimelate	Lysine	0,4001	71	0,1839	0,5793	0,0005
Pimelate	Maltose	0,3200	71	0,0937	0,5148	0,0065
Pimelate	Methanol	0,0944	71	-0,1420	0,3206	0,4337
Pimelate	Methylamine	0,4443	71	0,2354	0,6139	0,0001
Pimelate	Nicotinate	0,2349	71	0,0017	0,4439	0,0487
Pimelate	N-nitrosodimethylamine	0,3915	71	0,1741	0,5725	0,0007
Pimelate	N-Phenylacetylglycine	0,4485	71	0,2403	0,6172	<,0001
Pimelate	Ornithine	0,4730	71	0,2694	0,6361	<,0001
Pimelate	Phenylacetate	0,3404	71	0,1163	0,5315	0,0037
Pimelate	Phenylalanine	0,4638	71	0,2584	0,6290	<,0001
Proline	1,3-Dihydroxyacetone	0,7199	71	0,5848	0,8161	<,0001
Proline	2-Phenylpropionate	0,2693	71	0,0385	0,4729	0,0231
Proline	3-Hydroxybutyrate	0,4968	71	0,2980	0,6542	<,0001
Proline	3-Hydroxyphenylacetate	0,0874	71	-0,1489	0,3143	0,4685
Proline	3-Phenylpropionate	-0,0895	71	-0,3162	0,1469	0,4582
Proline	4-Hydroxybutyrate	0,4346	71	0,2240	0,6064	0,0002
Proline	Acetate	0,0930	71	-0,1434	0,3194	0,4405
Proline	Acetoacetate	0,5403	71	0,3513	0,6870	<,0001
Proline	Acetone	0,1213	71	-0,1153	0,3449	0,3136
Proline	Adipate	0,1037	71	-0,1329	0,3290	0,3896
Proline	Alanine	0,2453	71	0,0128	0,4527	0,0392
Proline	Allantoin	0,0205	71	-0,2138	0,2526	0,8651
Proline	Aspartate	0,7298	71	0,5984	0,8230	<,0001
Proline	Benzoate	-0,0838	71	-0,3110	0,1525	0,4874
Proline	Butyrate	0,1185	71	-0,1181	0,3423	0,3251
Proline	Cadaverine	0,2316	71	-0,0018	0,4411	0,0520
Proline	Caffeine	0,1830	71	-0,0526	0,3992	0,1267
Proline	Carnitine	0,4041	71	0,1886	0,5825	0,0005
Proline	Choline	0,6979	71	0,5549	0,8008	<,0001
Proline	Dimethylamine	0,5929	71	0,4173	0,7258	<,0001
Proline	Ethanol	0,5569	71	0,3719	0,6993	<,0001
Proline	Ferulate	0,1104	71	-0,1262	0,3350	0,3596
Proline	Formate	-0,0509	71	-0,2808	0,1846	0,6735
Proline	Fumarate	0,0196	71	-0,2147	0,2517	0,8712
Proline	Glucose	0,3426	71	0,1188	0,5333	0,0034
Proline	Glutamate	0,4579	71	0,2514	0,6245	<,0001
Proline	Glycerol	0,7287	71	0,5968	0,8222	<,0001
Proline	Glycine	0,5736	71	0,3928	0,7117	<,0001
Proline	Histidine	0,0141	71	-0,2200	0,2466	0,9073
Proline	Hypoxanthine	0,1678	71	-0,0681	0,3860	0,1618
Proline	Imidazole	0,0253	71	-0,2092	0,2571	0,8340
Proline	Isobutyrate	0,5014	71	0,3036	0,6577	<,0001
Proline	Isoleucine	0,5385	71	0,3490	0,6856	<,0001
Proline	Isopropanol	0,4223	71	0,2096	0,5968	0,0002
Proline	Isovalerate	0,2740	71	0,0434	0,4768	0,0208
Proline	Lactate	0,1640	71	-0,0720	0,3827	0,1716
Proline	Leucine	0,0390	71	-0,1961	0,2699	0,7467
Proline	Lysine	0,2525	71	0,0204	0,4587	0,0337
Proline	Maltose	0,2785	71	0,0483	0,4806	0,0187
Proline	Methanol	0,7017	71	0,5601	0,8035	<,0001
Proline	Methylamine	0,3751	71	0,1554	0,5595	0,0013
Proline	Nicotinate	0,2028	71	-0,0320	0,4164	0,0898
Proline	N-nitrosodimethylamine	0,6177	71	0,4492	0,7438	<,0001
Proline	N-Phenylacetylglycine	-0,0062	71	-0,2391	0,2275	0,9593
Proline	Ornithine	0,5959	71	0,4212	0,7280	<,0001
Proline	Phenylacetate	0,4100	71	0,1954	0,5872	0,0004
Proline	Phenylalanine	-0,0604	71	-0,2897	0,1753	0,6165
Proline	Pimelate	-0,0025	71	-0,2357	0,2309	0,9833
Propionate	1,3-Dihydroxyacetone	0,1082	71	-0,1283	0,3331	0,3689
Propionate	2-Phenylpropionate	0,5615	71	0,3776	0,7027	<,0001
Propionate	3-Hydroxybutyrate	0,6673	71	0,5141	0,7793	<,0001
Propionate	3-Hydroxyphenylacetate	0,3667	71	0,1458	0,5527	0,0017
Propionate	3-Phenylpropionate	-0,1352	71	-0,3572	0,1013	0,2609
Propionate	4-Hydroxybutyrate	0,5396	71	0,3504	0,6865	<,0001
Propionate	Acetate	0,3731	71	0,1532	0,5579	0,0014
Propionate	Acetoacetate	0,6583	71	0,5022	0,7729	<,0001
Propionate	Acetone	0,7683	71	0,6518	0,8494	<,0001
Propionate	Adipate	0,3979	71	0,1815	0,5776	0,0006
Propionate	Alanine	0,6717	71	0,5198	0,7824	<,0001
Propionate	Allantoin	-0,0111	71	-0,2438	0,2228	0,9269
Propionate	Aspartate	0,2327	71	-0,0006	0,4420	0,0508
Propionate	Benzoate	0,3208	71	0,0946	0,5155	0,0064
Propionate	Butyrate	0,3732	71	0,1532	0,5579	0,0013
Propionate	Cadaverine	0,2762	71	0,0458	0,4786	0,0197
Propionate	Caffeine	-0,0376	71	-0,2686	0,1974	0,7553
Propionate	Carnitine	0,6547	71	0,4974	0,7704	<,0001
Propionate	Choline	0,3119	71	0,0847	0,5082	0,0081
Propionate	Dimethylamine	0,4546	71	0,2476	0,6219	<,0001
Propionate	Ethanol	0,6105	71	0,4398	0,7386	<,0001
Propionate	Ferulate	0,2842	71	0,0545	0,4853	0,0163
Propionate	Formate	0,2376	71	0,0046	0,4462	0,0460
Propionate	Fumarate	0,0232	71	-0,2113	0,2551	0,8480
Propionate	Glucose	0,5669	71	0,3845	0,7067	<,0001
Propionate	Glutamate	0,5851	71	0,4074	0,7201	<,0001
Propionate	Glycerol	0,3077	71	0,0801	0,5047	0,0091
Propionate	Glycine	0,4901	71	0,2900	0,6492	<,0001
Propionate	Histidine	0,3398	71	0,1157	0,5310	0,0037
Propionate	Hypoxanthine	0,3761	71	0,1565	0,5602	0,0012
Propionate	Imidazole	0,2985	71	0,0701	0,4972	0,0115
Propionate	Isobutyrate	0,3686	71	0,1480	0,5542	0,0016
Propionate	Isoleucine	0,5634	71	0,3801	0,7042	<,0001
Propionate	Isopropanol	0,6894	71	0,5435	0,7948	<,0001
Propionate	Isovalerate	0,4592	71	0,2530	0,6255	<,0001
Propionate	Lactate	0,2540	71	0,0220	0,4600	0,0326
Propionate	Leucine	0,6727	71	0,5212	0,7831	<,0001
Propionate	Lysine	0,3589	71	0,1371	0,5465	0,0021
Propionate	Maltose	0,3488	71	0,1257	0,5383	0,0029
Propionate	Methanol	0,3657	71	0,1447	0,5519	0,0017
Propionate	Methylamine	0,5858	71	0,4083	0,7206	<,0001
Propionate	Nicotinate	0,2831	71	0,0533	0,4844	0,0168
Propionate	N-nitrosodimethylamine	0,7234	71	0,5895	0,8185	<,0001
Propionate	N-Phenylacetylglycine	0,3828	71	0,1641	0,5656	0,0010
Propionate	Ornithine	0,6958	71	0,5521	0,7993	<,0001
Propionate	Phenylacetate	0,3722	71	0,1521	0,5572	0,0014
Propionate	Phenylalanine	0,4750	71	0,2718	0,6376	<,0001
Propionate	Pimelate	0,6755	71	0,5249	0,7850	<,0001
Propionate	Proline	0,1549	71	-0,0813	0,3747	0,1971
Ribose	1,3-Dihydroxyacetone	0,4391	71	0,2293	0,6099	0,0001
Ribose	2-Phenylpropionate	0,5738	71	0,3931	0,7118	<,0001
Ribose	3-Hydroxybutyrate	0,5213	71	0,3279	0,6728	<,0001
Ribose	3-Hydroxyphenylacetate	0,2808	71	0,0509	0,4825	0,0177
Ribose	3-Phenylpropionate	0,0082	71	-0,2255	0,2411	0,9456
Ribose	4-Hydroxybutyrate	0,5324	71	0,3415	0,6811	<,0001
Ribose	Acetate	0,2282	71	-0,0054	0,4382	0,0556
Ribose	Acetoacetate	0,6078	71	0,4364	0,7367	<,0001
Ribose	Acetone	0,5382	71	0,3486	0,6854	<,0001
Ribose	Adipate	0,2172	71	-0,0170	0,4288	0,0688
Ribose	Alanine	0,5917	71	0,4158	0,7249	<,0001
Ribose	Allantoin	-0,0327	71	-0,2640	0,2021	0,7866
Ribose	Aspartate	0,4565	71	0,2498	0,6234	<,0001
Ribose	Benzoate	0,1240	71	-0,1125	0,3473	0,3027
Ribose	Butyrate	0,2307	71	-0,0028	0,4403	0,0529
Ribose	Cadaverine	0,5156	71	0,3209	0,6685	<,0001
Ribose	Caffeine	0,0533	71	-0,1823	0,2831	0,6588
Ribose	Carnitine	0,6227	71	0,4556	0,7474	<,0001
Ribose	Choline	0,7014	71	0,5596	0,8032	<,0001
Ribose	Dimethylamine	0,4665	71	0,2617	0,6311	<,0001
Ribose	Ethanol	0,5945	71	0,4194	0,7270	<,0001
Ribose	Ferulate	0,2937	71	0,0649	0,4932	0,0129
Ribose	Formate	0,0521	71	-0,1835	0,2819	0,6663
Ribose	Fumarate	0,0260	71	-0,2086	0,2577	0,8296
Ribose	Glucose	0,6823	71	0,5341	0,7899	<,0001
Ribose	Glutamate	0,7127	71	0,5750	0,8111	<,0001
Ribose	Glycerol	0,6136	71	0,4439	0,7409	<,0001
Ribose	Glycine	0,6964	71	0,5529	0,7998	<,0001
Ribose	Histidine	0,2615	71	0,0300	0,4664	0,0276
Ribose	Hypoxanthine	0,3507	71	0,1278	0,5398	0,0027
Ribose	Imidazole	0,2760	71	0,0456	0,4785	0,0198
Ribose	Isobutyrate	0,8220	71	0,7284	0,8855	<,0001
Ribose	Isoleucine	0,6780	71	0,5282	0,7868	<,0001
Ribose	Isopropanol	0,4613	71	0,2554	0,6271	<,0001
Ribose	Isovalerate	0,4144	71	0,2005	0,5906	0,0003
Ribose	Lactate	0,5767	71	0,3968	0,7139	<,0001
Ribose	Leucine	0,3700	71	0,1496	0,5553	0,0015
Ribose	Lysine	0,5300	71	0,3385	0,6793	<,0001
Ribose	Maltose	0,5628	71	0,3792	0,7037	<,0001
Ribose	Methanol	0,6297	71	0,4647	0,7525	<,0001
Ribose	Methylamine	0,5307	71	0,3394	0,6798	<,0001
Ribose	Nicotinate	0,3151	71	0,0882	0,5108	0,0074
Ribose	N-nitrosodimethylamine	0,5318	71	0,3407	0,6806	<,0001
Ribose	N-Phenylacetylglycine	0,4019	71	0,1861	0,5808	0,0005
Ribose	Ornithine	0,5723	71	0,3912	0,7107	<,0001
Ribose	Phenylacetate	0,6440	71	0,4833	0,7627	<,0001
Ribose	Phenylalanine	0,3520	71	0,1293	0,5409	0,0026
Ribose	Pimelate	0,2245	71	-0,0093	0,4350	0,0598
Ribose	Proline	0,5607	71	0,3766	0,7021	<,0001
Ribose	Propionate	0,3311	71	0,1060	0,5239	0,0048
Serine	1,3-Dihydroxyacetone	0,8377	71	0,7512	0,8959	<,0001
Serine	2-Phenylpropionate	0,3087	71	0,0812	0,5056	0,0088
Serine	3-Hydroxybutyrate	0,4665	71	0,2617	0,6311	<,0001
Serine	3-Hydroxyphenylacetate	0,1851	71	-0,0504	0,4011	0,1223
Serine	3-Phenylpropionate	-0,0772	71	-0,3050	0,1590	0,5224
Serine	4-Hydroxybutyrate	0,4785	71	0,2760	0,6403	<,0001
Serine	Acetate	0,0930	71	-0,1434	0,3194	0,4403
Serine	Acetoacetate	0,4409	71	0,2314	0,6113	0,0001
Serine	Acetone	0,1855	71	-0,0500	0,4014	0,1214
Serine	Adipate	0,1181	71	-0,1185	0,3420	0,3267
Serine	Alanine	0,2274	71	-0,0062	0,4375	0,0565
Serine	Allantoin	0,0781	71	-0,1581	0,3059	0,5173
Serine	Aspartate	0,6357	71	0,4725	0,7568	<,0001
Serine	Benzoate	-0,0408	71	-0,2715	0,1944	0,7357
Serine	Butyrate	0,0710	71	-0,1650	0,2994	0,5561
Serine	Cadaverine	0,2755	71	0,0451	0,4781	0,0201
Serine	Caffeine	0,1386	71	-0,0979	0,3602	0,2492
Serine	Carnitine	0,4159	71	0,2022	0,5917	0,0003
Serine	Choline	0,6573	71	0,5008	0,7722	<,0001
Serine	Dimethylamine	0,5249	71	0,3323	0,6755	<,0001
Serine	Ethanol	0,5412	71	0,3524	0,6877	<,0001
Serine	Ferulate	0,1703	71	-0,0657	0,3881	0,1557
Serine	Formate	0,0636	71	-0,1722	0,2926	0,5981
Serine	Fumarate	0,0903	71	-0,1460	0,3170	0,4537
Serine	Glucose	0,3596	71	0,1379	0,5470	0,0021
Serine	Glutamate	0,3847	71	0,1663	0,5671	0,0009
Serine	Glycerol	0,7892	71	0,6813	0,8635	<,0001
Serine	Glycine	0,6813	71	0,5326	0,7891	<,0001
Serine	Histidine	0,0851	71	-0,1512	0,3122	0,4802
Serine	Hypoxanthine	0,1166	71	-0,1199	0,3407	0,3327
Serine	Imidazole	0,0058	71	-0,2278	0,2388	0,9614
Serine	Isobutyrate	0,4480	71	0,2397	0,6168	<,0001
Serine	Isoleucine	0,5888	71	0,4121	0,7228	<,0001
Serine	Isopropanol	0,4098	71	0,1951	0,5870	0,0004
Serine	Isovalerate	0,2374	71	0,0043	0,4460	0,0462
Serine	Lactate	0,1706	71	-0,0653	0,3884	0,1550
Serine	Leucine	0,0564	71	-0,1793	0,2859	0,6407
Serine	Lysine	0,2767	71	0,0464	0,4790	0,0195
Serine	Maltose	0,5230	71	0,3299	0,6740	<,0001
Serine	Methanol	0,8105	71	0,7117	0,8778	<,0001
Serine	Methylamine	0,3638	71	0,1426	0,5504	0,0018
Serine	Nicotinate	0,1349	71	-0,1016	0,3569	0,2621
Serine	N-nitrosodimethylamine	0,5694	71	0,3876	0,7086	<,0001
Serine	N-Phenylacetylglycine	0,1414	71	-0,0951	0,3627	0,2396
Serine	Ornithine	0,6090	71	0,4379	0,7375	<,0001
Serine	Phenylacetate	0,5384	71	0,3489	0,6856	<,0001
Serine	Phenylalanine	0,0336	71	-0,2013	0,2648	0,7809
Serine	Pimelate	0,0052	71	-0,2284	0,2382	0,9658
Serine	Proline	0,8299	71	0,7399	0,8908	<,0001
Serine	Propionate	0,1271	71	-0,1095	0,3500	0,2909
Serine	Ribose	0,5655	71	0,3827	0,7057	<,0001
Succinate	1,3-Dihydroxyacetone	0,0632	71	-0,1726	0,2922	0,6003
Succinate	2-Phenylpropionate	0,3355	71	0,1109	0,5275	0,0042
Succinate	3-Hydroxybutyrate	0,2596	71	0,0280	0,4647	0,0288
Succinate	3-Hydroxyphenylacetate	0,0069	71	-0,2268	0,2398	0,9544
Succinate	3-Phenylpropionate	-0,0005	71	-0,2338	0,2329	0,9968
Succinate	4-Hydroxybutyrate	0,3401	71	0,1160	0,5313	0,0037
Succinate	Acetate	0,0594	71	-0,1763	0,2887	0,6225
Succinate	Acetoacetate	0,3266	71	0,1010	0,5203	0,0054
Succinate	Acetone	0,4346	71	0,2240	0,6064	0,0002
Succinate	Adipate	0,0482	71	-0,1872	0,2784	0,6896
Succinate	Alanine	0,3809	71	0,1620	0,5641	0,0010
Succinate	Allantoin	-0,0618	71	-0,2909	0,1740	0,6086
Succinate	Aspartate	0,1374	71	-0,0991	0,3592	0,2533
Succinate	Benzoate	0,0129	71	-0,2211	0,2454	0,9152
Succinate	Butyrate	0,0730	71	-0,1630	0,3012	0,5449
Succinate	Cadaverine	0,4214	71	0,2087	0,5961	0,0003
Succinate	Caffeine	-0,0150	71	-0,2475	0,2190	0,9009
Succinate	Carnitine	0,3560	71	0,1338	0,5441	0,0023
Succinate	Choline	0,4508	71	0,2430	0,6190	<,0001
Succinate	Dimethylamine	0,1515	71	-0,0848	0,3717	0,2072
Succinate	Ethanol	0,3067	71	0,0790	0,5039	0,0093
Succinate	Ferulate	0,0504	71	-0,1851	0,2804	0,6763
Succinate	Formate	-0,0674	71	-0,2960	0,1686	0,5767
Succinate	Fumarate	-0,0543	71	-0,2840	0,1813	0,6531
Succinate	Glucose	0,4467	71	0,2382	0,6158	<,0001
Succinate	Glutamate	0,6004	71	0,4269	0,7313	<,0001
Succinate	Glycerol	0,3127	71	0,0857	0,5089	0,0079
Succinate	Glycine	0,2937	71	0,0649	0,4932	0,0129
Succinate	Histidine	0,0788	71	-0,1574	0,3065	0,5134
Succinate	Hypoxanthine	0,1051	71	-0,1315	0,3303	0,3832
Succinate	Imidazole	0,0919	71	-0,1445	0,3184	0,4460
Succinate	Isobutyrate	0,8242	71	0,7315	0,8869	<,0001
Succinate	Isoleucine	0,3815	71	0,1627	0,5646	0,0010
Succinate	Isopropanol	0,2371	71	0,0040	0,4457	0,0465
Succinate	Isovalerate	0,2142	71	-0,0201	0,4262	0,0728
Succinate	Lactate	0,5753	71	0,3950	0,7129	<,0001
Succinate	Leucine	0,3129	71	0,0858	0,5090	0,0079
Succinate	Lysine	0,4065	71	0,1914	0,5844	0,0004
Succinate	Maltose	0,3005	71	0,0722	0,4988	0,0109
Succinate	Methanol	0,2153	71	-0,0190	0,4271	0,0714
Succinate	Methylamine	0,2196	71	-0,0144	0,4308	0,0658
Succinate	Nicotinate	0,0584	71	-0,1773	0,2878	0,6286
Succinate	N-nitrosodimethylamine	0,2190	71	-0,0151	0,4303	0,0666
Succinate	N-Phenylacetylglycine	0,1927	71	-0,0425	0,4077	0,1073
Succinate	Ornithine	0,2309	71	-0,0025	0,4405	0,0527
Succinate	Phenylacetate	0,2718	71	0,0411	0,4750	0,0218
Succinate	Phenylalanine	0,2529	71	0,0209	0,4591	0,0333
Succinate	Pimelate	0,1487	71	-0,0876	0,3692	0,2157
Succinate	Proline	0,2569	71	0,0251	0,4624	0,0306
Succinate	Propionate	0,2586	71	0,0269	0,4639	0,0294
Succinate	Ribose	0,7734	71	0,6590	0,8528	<,0001
Succinate	Serine	0,2057	71	-0,0290	0,4189	0,0853
Trimethylamine	1,3-Dihydroxyacetone	0,1004	71	-0,1361	0,3261	0,4048
Trimethylamine	2-Phenylpropionate	0,5837	71	0,4057	0,7191	<,0001
Trimethylamine	3-Hydroxybutyrate	0,6707	71	0,5185	0,7817	<,0001
Trimethylamine	3-Hydroxyphenylacetate	0,4795	71	0,2772	0,6411	<,0001
Trimethylamine	3-Phenylpropionate	-0,1459	71	-0,3667	0,0905	0,2247
Trimethylamine	4-Hydroxybutyrate	0,7002	71	0,5581	0,8024	<,0001
Trimethylamine	Acetate	0,3393	71	0,1151	0,5306	0,0038
Trimethylamine	Acetoacetate	0,7441	71	0,6181	0,8328	<,0001
Trimethylamine	Acetone	0,9098	71	0,8588	0,9429	<,0001
Trimethylamine	Adipate	0,3697	71	0,1492	0,5551	0,0015
Trimethylamine	Alanine	0,7650	71	0,6472	0,8471	<,0001
Trimethylamine	Allantoin	0,0136	71	-0,2204	0,2461	0,9103
Trimethylamine	Aspartate	0,2080	71	-0,0266	0,4209	0,0817
Trimethylamine	Benzoate	0,3738	71	0,1539	0,5584	0,0013
Trimethylamine	Butyrate	0,3158	71	0,0891	0,5115	0,0073
Trimethylamine	Cadaverine	0,4847	71	0,2835	0,6451	<,0001
Trimethylamine	Caffeine	-0,0220	71	-0,2540	0,2124	0,8557
Trimethylamine	Carnitine	0,8569	71	0,7794	0,9086	<,0001
Trimethylamine	Choline	0,3900	71	0,1724	0,5713	0,0008
Trimethylamine	Dimethylamine	0,4379	71	0,2279	0,6090	0,0001
Trimethylamine	Ethanol	0,6237	71	0,4569	0,7481	<,0001
Trimethylamine	Ferulate	0,4202	71	0,2072	0,5951	0,0003
Trimethylamine	Formate	0,4463	71	0,2378	0,6155	<,0001
Trimethylamine	Fumarate	0,0709	71	-0,1651	0,2993	0,5568
Trimethylamine	Glucose	0,7834	71	0,6732	0,8596	<,0001
Trimethylamine	Glutamate	0,6408	71	0,4791	0,7604	<,0001
Trimethylamine	Glycerol	0,3649	71	0,1439	0,5513	0,0018
Trimethylamine	Glycine	0,7026	71	0,5613	0,8041	<,0001
Trimethylamine	Histidine	0,4966	71	0,2979	0,6542	<,0001
Trimethylamine	Hypoxanthine	0,5535	71	0,3677	0,6969	<,0001
Trimethylamine	Imidazole	0,5150	71	0,3202	0,6680	<,0001
Trimethylamine	Isobutyrate	0,4710	71	0,2670	0,6346	<,0001
Trimethylamine	Isoleucine	0,6891	71	0,5432	0,7947	<,0001
Trimethylamine	Isopropanol	0,6818	71	0,5334	0,7895	<,0001
Trimethylamine	Isovalerate	0,5508	71	0,3643	0,6948	<,0001
Trimethylamine	Lactate	0,4261	71	0,2140	0,5998	0,0002
Trimethylamine	Leucine	0,6626	71	0,5078	0,7760	<,0001
Trimethylamine	Lysine	0,5628	71	0,3793	0,7037	<,0001
Trimethylamine	Maltose	0,5438	71	0,3556	0,6896	<,0001
Trimethylamine	Methanol	0,4908	71	0,2907	0,6497	<,0001
Trimethylamine	Methylamine	0,4854	71	0,2843	0,6456	<,0001
Trimethylamine	Nicotinate	0,4220	71	0,2093	0,5966	0,0002
Trimethylamine	N-nitrosodimethylamine	0,6602	71	0,5046	0,7742	<,0001
Trimethylamine	N-Phenylacetylglycine	0,5648	71	0,3818	0,7052	<,0001
Trimethylamine	Ornithine	0,7236	71	0,5899	0,8187	<,0001
Trimethylamine	Phenylacetate	0,6209	71	0,4532	0,7461	<,0001
Trimethylamine	Phenylalanine	0,5775	71	0,3978	0,7145	<,0001
Trimethylamine	Pimelate	0,5395	71	0,3503	0,6864	<,0001
Trimethylamine	Proline	0,1398	71	-0,0967	0,3613	0,2449
Trimethylamine	Propionate	0,6801	71	0,5311	0,7883	<,0001
Trimethylamine	Ribose	0,5430	71	0,3547	0,6891	<,0001
Trimethylamine	Serine	0,2123	71	-0,0221	0,4245	0,0756
Trimethylamine	Succinate	0,3642	71	0,1431	0,5507	0,0018
Tyrosine	1,3-Dihydroxyacetone	0,0055	71	-0,2281	0,2385	0,9636
Tyrosine	2-Phenylpropionate	0,2803	71	0,0503	0,4821	0,0179
Tyrosine	3-Hydroxybutyrate	0,1876	71	-0,0478	0,4032	0,1172
Tyrosine	3-Hydroxyphenylacetate	0,5909	71	0,4147	0,7243	<,0001
Tyrosine	3-Phenylpropionate	0,1594	71	-0,0768	0,3786	0,1842
Tyrosine	4-Hydroxybutyrate	0,1185	71	-0,1181	0,3423	0,3251
Tyrosine	Acetate	0,4557	71	0,2489	0,6228	<,0001
Tyrosine	Acetoacetate	0,2895	71	0,0602	0,4897	0,0143
Tyrosine	Acetone	0,4390	71	0,2292	0,6099	0,0001
Tyrosine	Adipate	0,3797	71	0,1606	0,5631	0,0011
Tyrosine	Alanine	0,3442	71	0,1206	0,5346	0,0033
Tyrosine	Allantoin	0,4238	71	0,2114	0,5980	0,0002
Tyrosine	Aspartate	-0,0207	71	-0,2528	0,2137	0,8642
Tyrosine	Benzoate	0,4672	71	0,2625	0,6317	<,0001
Tyrosine	Butyrate	0,3072	71	0,0796	0,5044	0,0092
Tyrosine	Cadaverine	0,1362	71	-0,1003	0,3581	0,2573
Tyrosine	Caffeine	0,2712	71	0,0404	0,4744	0,0222
Tyrosine	Carnitine	0,2711	71	0,0404	0,4744	0,0222
Tyrosine	Choline	0,1711	71	-0,0648	0,3889	0,1537
Tyrosine	Dimethylamine	0,0817	71	-0,1546	0,3091	0,4985
Tyrosine	Ethanol	0,2148	71	-0,0195	0,4267	0,0721
Tyrosine	Ferulate	0,7365	71	0,6076	0,8276	<,0001
Tyrosine	Formate	0,1877	71	-0,0476	0,4034	0,1169
Tyrosine	Fumarate	0,7484	71	0,6240	0,8357	<,0001
Tyrosine	Glucose	0,3319	71	0,1068	0,5245	0,0047
Tyrosine	Glutamate	0,1814	71	-0,0542	0,3979	0,1300
Tyrosine	Glycerol	0,0274	71	-0,2072	0,2591	0,8204
Tyrosine	Glycine	0,3138	71	0,0868	0,5098	0,0077
Tyrosine	Histidine	0,7482	71	0,6238	0,8356	<,0001
Tyrosine	Hypoxanthine	0,5046	71	0,3075	0,6602	<,0001
Tyrosine	Imidazole	0,4613	71	0,2555	0,6271	<,0001
Tyrosine	Isobutyrate	0,1716	71	-0,0643	0,3893	0,1525
Tyrosine	Isoleucine	0,2548	71	0,0228	0,4607	0,0320
Tyrosine	Isopropanol	0,2924	71	0,0634	0,4921	0,0133
Tyrosine	Isovalerate	0,4385	71	0,2286	0,6095	0,0001
Tyrosine	Lactate	0,1918	71	-0,0435	0,4069	0,1092
Tyrosine	Leucine	0,2350	71	0,0018	0,4440	0,0485
Tyrosine	Lysine	0,1608	71	-0,0753	0,3799	0,1803
Tyrosine	Maltose	0,2859	71	0,0564	0,4868	0,0156
Tyrosine	Methanol	0,2109	71	-0,0236	0,4234	0,0775
Tyrosine	Methylamine	0,2513	71	0,0191	0,4578	0,0345
Tyrosine	Nicotinate	0,4898	71	0,2896	0,6490	<,0001
Tyrosine	N-nitrosodimethylamine	0,1580	71	-0,0782	0,3774	0,1882
Tyrosine	N-Phenylacetylglycine	0,7437	71	0,6176	0,8326	<,0001
Tyrosine	Ornithine	0,3090	71	0,0816	0,5059	0,0087
Tyrosine	Phenylacetate	0,4753	71	0,2722	0,6379	<,0001
Tyrosine	Phenylalanine	0,7310	71	0,6001	0,8238	<,0001
Tyrosine	Pimelate	0,1573	71	-0,0789	0,3767	0,1903
Tyrosine	Proline	-0,0524	71	-0,2823	0,1831	0,6640
Tyrosine	Propionate	0,2295	71	-0,0041	0,4392	0,0542
Tyrosine	Ribose	0,2217	71	-0,0123	0,4326	0,0632
Tyrosine	Serine	0,1347	71	-0,1018	0,3568	0,2626
Tyrosine	Succinate	0,0911	71	-0,1453	0,3177	0,4498
Tyrosine	Trimethylamine	0,3687	71	0,1481	0,5543	0,0016
Uracil	1,3-Dihydroxyacetone	0,0072	71	-0,2265	0,2401	0,9525
Uracil	2-Phenylpropionate	0,3857	71	0,1675	0,5679	0,0009
Uracil	3-Hydroxybutyrate	0,3513	71	0,1286	0,5403	0,0027
Uracil	3-Hydroxyphenylacetate	0,7348	71	0,6052	0,8264	<,0001
Uracil	3-Phenylpropionate	-0,1085	71	-0,3334	0,1280	0,3676
Uracil	4-Hydroxybutyrate	0,1576	71	-0,0786	0,3771	0,1892
Uracil	Acetate	0,4862	71	0,2853	0,6462	<,0001
Uracil	Acetoacetate	0,5688	71	0,3868	0,7081	<,0001
Uracil	Acetone	0,5676	71	0,3853	0,7073	<,0001
Uracil	Adipate	0,3945	71	0,1776	0,5749	0,0007
Uracil	Alanine	0,4547	71	0,2477	0,6221	<,0001
Uracil	Allantoin	0,3782	71	0,1589	0,5619	0,0011
Uracil	Aspartate	0,0133	71	-0,2207	0,2458	0,9126
Uracil	Benzoate	0,5564	71	0,3712	0,6989	<,0001
Uracil	Butyrate	0,3892	71	0,1714	0,5707	0,0008
Uracil	Cadaverine	0,0012	71	-0,2322	0,2344	0,9921
Uracil	Caffeine	0,2435	71	0,0108	0,4512	0,0407
Uracil	Carnitine	0,5213	71	0,3278	0,6727	<,0001
Uracil	Choline	0,2303	71	-0,0032	0,4400	0,0533
Uracil	Dimethylamine	0,2371	71	0,0040	0,4457	0,0465
Uracil	Ethanol	0,3070	71	0,0794	0,5042	0,0092
Uracil	Ferulate	0,8121	71	0,7141	0,8789	<,0001
Uracil	Formate	0,2996	71	0,0713	0,4981	0,0111
Uracil	Fumarate	0,6515	71	0,4931	0,7680	<,0001
Uracil	Glucose	0,5154	71	0,3206	0,6683	<,0001
Uracil	Glutamate	0,3538	71	0,1313	0,5423	0,0025
Uracil	Glycerol	0,0307	71	-0,2040	0,2622	0,7991
Uracil	Glycine	0,4415	71	0,2321	0,6118	0,0001
Uracil	Histidine	0,8319	71	0,7427	0,8921	<,0001
Uracil	Hypoxanthine	0,9084	71	0,8566	0,9420	<,0001
Uracil	Imidazole	0,7557	71	0,6342	0,8408	<,0001
Uracil	Isobutyrate	0,2168	71	-0,0174	0,4284	0,0693
Uracil	Isoleucine	0,3122	71	0,0851	0,5085	0,0080
Uracil	Isopropanol	0,3733	71	0,1533	0,5580	0,0013
Uracil	Isovalerate	0,5833	71	0,4051	0,7188	<,0001
Uracil	Lactate	0,1020	71	-0,1345	0,3275	0,3974
Uracil	Leucine	0,3113	71	0,0841	0,5077	0,0082
Uracil	Lysine	0,0936	71	-0,1428	0,3200	0,4373
Uracil	Maltose	0,2522	71	0,0201	0,4585	0,0339
Uracil	Methanol	0,2794	71	0,0494	0,4814	0,0183
Uracil	Methylamine	0,3560	71	0,1338	0,5441	0,0023
Uracil	Nicotinate	0,8548	71	0,7763	0,9072	<,0001
Uracil	N-nitrosodimethylamine	0,3642	71	0,1430	0,5507	0,0018
Uracil	N-Phenylacetylglycine	0,6996	71	0,5572	0,8020	<,0001
Uracil	Ornithine	0,4599	71	0,2539	0,6260	<,0001
Uracil	Phenylacetate	0,5203	71	0,3267	0,6720	<,0001
Uracil	Phenylalanine	0,7273	71	0,5950	0,8213	<,0001
Uracil	Pimelate	0,3072	71	0,0796	0,5044	0,0092
Uracil	Proline	0,1220	71	-0,1145	0,3455	0,3107
Uracil	Propionate	0,3826	71	0,1639	0,5654	0,0010
Uracil	Ribose	0,3176	71	0,0910	0,5129	0,0070
Uracil	Serine	0,1074	71	-0,1291	0,3324	0,3726
Uracil	Succinate	0,0940	71	-0,1424	0,3203	0,4353
Uracil	Trimethylamine	0,5367	71	0,3468	0,6843	<,0001
Uracil	Tyrosine	0,7054	71	0,5650	0,8060	<,0001
Urea	1,3-Dihydroxyacetone	0,0276	71	-0,2070	0,2593	0,8190
Urea	2-Phenylpropionate	0,0160	71	-0,2182	0,2483	0,8949
Urea	3-Hydroxybutyrate	-0,0034	71	-0,2365	0,2301	0,9778
Urea	3-Hydroxyphenylacetate	0,3029	71	0,0749	0,5008	0,0102
Urea	3-Phenylpropionate	0,0173	71	-0,2169	0,2496	0,8861
Urea	4-Hydroxybutyrate	-0,1607	71	-0,3797	0,0755	0,1807
Urea	Acetate	0,1920	71	-0,0433	0,4071	0,1087
Urea	Acetoacetate	0,1416	71	-0,0949	0,3629	0,2389
Urea	Acetone	0,0726	71	-0,1634	0,3009	0,5471
Urea	Adipate	0,0922	71	-0,1442	0,3186	0,4445
Urea	Alanine	-0,0759	71	-0,3038	0,1603	0,5293
Urea	Allantoin	0,9955	71	0,9927	0,9972	<,0001
Urea	Aspartate	-0,0393	71	-0,2702	0,1958	0,7447
Urea	Benzoate	0,1014	71	-0,1351	0,3270	0,4000
Urea	Butyrate	0,0393	71	-0,1958	0,2701	0,7451
Urea	Cadaverine	-0,1953	71	-0,4099	0,0398	0,1026
Urea	Caffeine	0,1785	71	-0,0572	0,3953	0,1364
Urea	Carnitine	0,0273	71	-0,2073	0,2589	0,8213
Urea	Choline	0,0411	71	-0,1941	0,2718	0,7338
Urea	Dimethylamine	0,0715	71	-0,1646	0,2998	0,5537
Urea	Ethanol	-0,0303	71	-0,2617	0,2045	0,8021
Urea	Ferulate	0,2578	71	0,0261	0,4633	0,0300
Urea	Formate	0,0343	71	-0,2006	0,2655	0,7765
Urea	Fumarate	0,8442	71	0,7607	0,9002	<,0001
Urea	Glucose	0,0034	71	-0,2301	0,2365	0,9775
Urea	Glutamate	-0,1848	71	-0,4008	0,0507	0,1229
Urea	Glycerol	-0,1055	71	-0,3307	0,1310	0,3811
Urea	Glycine	0,0170	71	-0,2171	0,2494	0,8878
Urea	Histidine	0,3204	71	0,0941	0,5152	0,0065
Urea	Hypoxanthine	0,2352	71	0,0020	0,4441	0,0484
Urea	Imidazole	0,1929	71	-0,0423	0,4078	0,1070
Urea	Isobutyrate	0,0091	71	-0,2247	0,2419	0,9398
Urea	Isoleucine	-0,1074	71	-0,3323	0,1292	0,3729
Urea	Isopropanol	0,0222	71	-0,2122	0,2542	0,8541
Urea	Isovalerate	0,0305	71	-0,2043	0,2619	0,8009
Urea	Lactate	-0,0262	71	-0,2579	0,2084	0,8285
Urea	Leucine	-0,1265	71	-0,3495	0,1100	0,2930
Urea	Lysine	-0,1655	71	-0,3840	0,0705	0,1677
Urea	Maltose	-0,0362	71	-0,2672	0,1988	0,7645
Urea	Methanol	0,0389	71	-0,1962	0,2697	0,7475
Urea	Methylamine	0,0652	71	-0,1707	0,2940	0,5893
Urea	Nicotinate	0,3791	71	0,1599	0,5626	0,0011
Urea	N-nitrosodimethylamine	0,0361	71	-0,1989	0,2671	0,7651
Urea	N-Phenylacetylglycine	0,1748	71	-0,0610	0,3921	0,1449
Urea	Ornithine	0,0144	71	-0,2196	0,2469	0,9052
Urea	Phenylacetate	0,0291	71	-0,2056	0,2606	0,8097
Urea	Phenylalanine	0,2802	71	0,0502	0,4820	0,0179
Urea	Pimelate	-0,1499	71	-0,3702	0,0865	0,2122
Urea	Proline	0,0118	71	-0,2221	0,2444	0,9222
Urea	Propionate	-0,0026	71	-0,2358	0,2308	0,9827
Urea	Ribose	-0,0296	71	-0,2611	0,2052	0,8067
Urea	Serine	0,0745	71	-0,1616	0,3026	0,5367
Urea	Succinate	-0,0613	71	-0,2905	0,1745	0,6115
Urea	Trimethylamine	0,0269	71	-0,2077	0,2585	0,8240
Urea	Tyrosine	0,4624	71	0,2568	0,6279	<,0001
Urea	Uracil	0,4231	71	0,2106	0,5974	0,0002
Valerate	1,3-Dihydroxyacetone	-0,0470	71	-0,2773	0,1883	0,6969
Valerate	2-Phenylpropionate	0,5575	71	0,3726	0,6998	<,0001
Valerate	3-Hydroxybutyrate	0,4944	71	0,2952	0,6525	<,0001
Valerate	3-Hydroxyphenylacetate	0,4251	71	0,2129	0,5990	0,0002
Valerate	3-Phenylpropionate	-0,1049	71	-0,3301	0,1316	0,3838
Valerate	4-Hydroxybutyrate	0,4983	71	0,2999	0,6554	<,0001
Valerate	Acetate	0,2264	71	-0,0073	0,4366	0,0577
Valerate	Acetoacetate	0,5301	71	0,3387	0,6794	<,0001
Valerate	Acetone	0,6280	71	0,4625	0,7513	<,0001
Valerate	Adipate	0,5758	71	0,3957	0,7133	<,0001
Valerate	Alanine	0,7201	71	0,5851	0,8162	<,0001
Valerate	Allantoin	-0,1163	71	-0,3403	0,1203	0,3343
Valerate	Aspartate	0,0057	71	-0,2279	0,2387	0,9623
Valerate	Benzoate	0,2027	71	-0,0321	0,4163	0,0901
Valerate	Butyrate	0,5630	71	0,3795	0,7038	<,0001
Valerate	Cadaverine	0,3201	71	0,0939	0,5150	0,0065
Valerate	Caffeine	-0,0178	71	-0,2501	0,2164	0,8829
Valerate	Carnitine	0,5126	71	0,3172	0,6662	<,0001
Valerate	Choline	0,1182	71	-0,1184	0,3421	0,3263
Valerate	Dimethylamine	0,2440	71	0,0113	0,4516	0,0403
Valerate	Ethanol	0,4270	71	0,2151	0,6004	0,0002
Valerate	Ferulate	0,2764	71	0,0460	0,4788	0,0196
Valerate	Formate	0,3276	71	0,1021	0,5211	0,0053
Valerate	Fumarate	-0,1339	71	-0,3560	0,1027	0,2658
Valerate	Glucose	0,3841	71	0,1657	0,5666	0,0009
Valerate	Glutamate	0,4439	71	0,2349	0,6136	0,0001
Valerate	Glycerol	0,1561	71	-0,0801	0,3757	0,1936
Valerate	Glycine	0,3880	71	0,1701	0,5698	0,0008
Valerate	Histidine	0,2245	71	-0,0093	0,4350	0,0598
Valerate	Hypoxanthine	0,3721	71	0,1520	0,5571	0,0014
Valerate	Imidazole	0,2507	71	0,0184	0,4572	0,0350
Valerate	Isobutyrate	0,1386	71	-0,0979	0,3602	0,2491
Valerate	Isoleucine	0,4870	71	0,2862	0,6468	<,0001
Valerate	Isopropanol	0,5734	71	0,3927	0,7115	<,0001
Valerate	Isovalerate	0,3681	71	0,1474	0,5538	0,0016
Valerate	Lactate	0,3028	71	0,0747	0,5007	0,0103
Valerate	Leucine	0,6991	71	0,5566	0,8017	<,0001
Valerate	Lysine	0,3975	71	0,1810	0,5773	0,0006
Valerate	Maltose	0,3593	71	0,1376	0,5468	0,0021
Valerate	Methanol	0,1872	71	-0,0482	0,4029	0,1180
Valerate	Methylamine	0,4855	71	0,2845	0,6457	<,0001
Valerate	Nicotinate	0,2576	71	0,0259	0,4631	0,0301
Valerate	N-nitrosodimethylamine	0,4936	71	0,2941	0,6518	<,0001
Valerate	N-Phenylacetylglycine	0,4334	71	0,2226	0,6054	0,0002
Valerate	Ornithine	0,5355	71	0,3453	0,6834	<,0001
Valerate	Phenylacetate	0,3517	71	0,1290	0,5406	0,0026
Valerate	Phenylalanine	0,4659	71	0,2609	0,6306	<,0001
Valerate	Pimelate	0,9589	71	0,9347	0,9742	<,0001
Valerate	Proline	0,0300	71	-0,2047	0,2615	0,8038
Valerate	Propionate	0,7651	71	0,6473	0,8472	<,0001
Valerate	Ribose	0,2349	71	0,0017	0,4439	0,0486
Valerate	Serine	0,0476	71	-0,1878	0,2778	0,6936
Valerate	Succinate	0,1213	71	-0,1153	0,3448	0,3137
Valerate	Trimethylamine	0,6333	71	0,4693	0,7550	<,0001
Valerate	Tyrosine	0,1443	71	-0,0921	0,3653	0,2299
Valerate	Uracil	0,3419	71	0,1180	0,5327	0,0035
Valerate	Urea	-0,1089	71	-0,3337	0,1276	0,3660
Valine	1,3-Dihydroxyacetone	0,3594	71	0,1376	0,5469	0,0021
Valine	2-Phenylpropionate	0,7158	71	0,5792	0,8133	<,0001
Valine	3-Hydroxybutyrate	0,7734	71	0,6591	0,8528	<,0001
Valine	3-Hydroxyphenylacetate	0,2981	71	0,0696	0,4969	0,0116
Valine	3-Phenylpropionate	-0,0905	71	-0,3171	0,1459	0,4529
Valine	4-Hydroxybutyrate	0,8627	71	0,7881	0,9124	<,0001
Valine	Acetate	0,2956	71	0,0669	0,4948	0,0123
Valine	Acetoacetate	0,7785	71	0,6661	0,8563	<,0001
Valine	Acetone	0,6689	71	0,5161	0,7804	<,0001
Valine	Adipate	0,3260	71	0,1003	0,5198	0,0055
Valine	Alanine	0,7988	71	0,6951	0,8700	<,0001
Valine	Allantoin	-0,1091	71	-0,3339	0,1274	0,3650
Valine	Aspartate	0,4611	71	0,2553	0,6270	<,0001
Valine	Benzoate	0,1248	71	-0,1117	0,3480	0,2997
Valine	Butyrate	0,3005	71	0,0723	0,4988	0,0109
Valine	Cadaverine	0,6707	71	0,5185	0,7817	<,0001
Valine	Caffeine	0,0318	71	-0,2030	0,2631	0,7925
Valine	Carnitine	0,7648	71	0,6470	0,8470	<,0001
Valine	Choline	0,6294	71	0,4642	0,7522	<,0001
Valine	Dimethylamine	0,5523	71	0,3661	0,6959	<,0001
Valine	Ethanol	0,8604	71	0,7846	0,9109	<,0001
Valine	Ferulate	0,2745	71	0,0440	0,4773	0,0205
Valine	Formate	0,3828	71	0,1641	0,5656	0,0010
Valine	Fumarate	-0,0985	71	-0,3244	0,1379	0,4136
Valine	Glucose	0,7342	71	0,6045	0,8260	<,0001
Valine	Glutamate	0,8034	71	0,7016	0,8731	<,0001
Valine	Glycerol	0,6814	71	0,5327	0,7892	<,0001
Valine	Glycine	0,7561	71	0,6348	0,8411	<,0001
Valine	Histidine	0,2320	71	-0,0014	0,4414	0,0516
Valine	Hypoxanthine	0,3580	71	0,1360	0,5457	0,0022
Valine	Imidazole	0,2871	71	0,0577	0,4877	0,0152
Valine	Isobutyrate	0,5795	71	0,4003	0,7160	<,0001
Valine	Isoleucine	0,9138	71	0,8649	0,9456	<,0001
Valine	Isopropanol	0,7360	71	0,6069	0,8272	<,0001
Valine	Isovalerate	0,6202	71	0,4523	0,7456	<,0001
Valine	Lactate	0,5027	71	0,3052	0,6588	<,0001
Valine	Leucine	0,7048	71	0,5642	0,8056	<,0001
Valine	Lysine	0,7587	71	0,6385	0,8429	<,0001
Valine	Maltose	0,7680	71	0,6514	0,8492	<,0001
Valine	Methanol	0,6021	71	0,4291	0,7325	<,0001
Valine	Methylamine	0,5317	71	0,3406	0,6806	<,0001
Valine	Nicotinate	0,2655	71	0,0344	0,4697	0,0252
Valine	N-nitrosodimethylamine	0,7553	71	0,6337	0,8405	<,0001
Valine	N-Phenylacetylglycine	0,3872	71	0,1691	0,5691	0,0009
Valine	Ornithine	0,7835	71	0,6733	0,8597	<,0001
Valine	Phenylacetate	0,6662	71	0,5126	0,7785	<,0001
Valine	Phenylalanine	0,4056	71	0,1903	0,5837	0,0004
Valine	Pimelate	0,4883	71	0,2877	0,6478	<,0001
Valine	Proline	0,3980	71	0,1816	0,5777	0,0006
Valine	Propionate	0,6539	71	0,4963	0,7697	<,0001
Valine	Ribose	0,5874	71	0,4104	0,7218	<,0001
Valine	Serine	0,4382	71	0,2283	0,6092	0,0001
Valine	Succinate	0,3678	71	0,1471	0,5536	0,0016
Valine	Trimethylamine	0,7156	71	0,5789	0,8131	<,0001
Valine	Tyrosine	0,2381	71	0,0051	0,4466	0,0455
Valine	Uracil	0,2779	71	0,0477	0,4801	0,0189
Valine	Urea	-0,1164	71	-0,3404	0,1202	0,3339
Valine	Valerate	0,5457	71	0,3580	0,6910	<,0001
Xanthine	1,3-Dihydroxyacetone	0,0397	71	-0,1955	0,2705	0,7426
Xanthine	2-Phenylpropionate	0,3357	71	0,1111	0,5277	0,0042
Xanthine	3-Hydroxybutyrate	0,3352	71	0,1106	0,5273	0,0043
Xanthine	3-Hydroxyphenylacetate	0,5001	71	0,3021	0,6568	<,0001
Xanthine	3-Phenylpropionate	-0,1494	71	-0,3698	0,0869	0,2136
Xanthine	4-Hydroxybutyrate	0,1705	71	-0,0654	0,3884	0,1551
Xanthine	Acetate	0,4006	71	0,1845	0,5797	0,0005
Xanthine	Acetoacetate	0,5670	71	0,3846	0,7068	<,0001
Xanthine	Acetone	0,4398	71	0,2300	0,6104	0,0001
Xanthine	Adipate	0,2248	71	-0,0090	0,4353	0,0594
Xanthine	Alanine	0,3083	71	0,0808	0,5053	0,0089
Xanthine	Allantoin	0,2289	71	-0,0047	0,4387	0,0549
Xanthine	Aspartate	0,0592	71	-0,1765	0,2885	0,6239
Xanthine	Benzoate	0,4467	71	0,2382	0,6158	<,0001
Xanthine	Butyrate	0,2533	71	0,0212	0,4594	0,0331
Xanthine	Cadaverine	-0,0483	71	-0,2785	0,1871	0,6892
Xanthine	Caffeine	0,2118	71	-0,0226	0,4241	0,0762
Xanthine	Carnitine	0,5227	71	0,3296	0,6738	<,0001
Xanthine	Choline	0,2118	71	-0,0226	0,4242	0,0762
Xanthine	Dimethylamine	0,2404	71	0,0075	0,4486	0,0434
Xanthine	Ethanol	0,2977	71	0,0692	0,4965	0,0117
Xanthine	Ferulate	0,6262	71	0,4602	0,7500	<,0001
Xanthine	Formate	0,3903	71	0,1727	0,5715	0,0008
Xanthine	Fumarate	0,4376	71	0,2275	0,6088	0,0001
Xanthine	Glucose	0,4526	71	0,2452	0,6204	<,0001
Xanthine	Glutamate	0,3341	71	0,1093	0,5264	0,0044
Xanthine	Glycerol	0,0437	71	-0,1916	0,2742	0,7174
Xanthine	Glycine	0,3746	71	0,1548	0,5590	0,0013
Xanthine	Histidine	0,6653	71	0,5114	0,7779	<,0001
Xanthine	Hypoxanthine	0,8704	71	0,7995	0,9174	<,0001
Xanthine	Imidazole	0,7308	71	0,5997	0,8237	<,0001
Xanthine	Isobutyrate	0,1400	71	-0,0965	0,3615	0,2443
Xanthine	Isoleucine	0,2466	71	0,0141	0,4538	0,0381
Xanthine	Isopropanol	0,2722	71	0,0416	0,4754	0,0216
Xanthine	Isovalerate	0,5505	71	0,3640	0,6946	<,0001
Xanthine	Lactate	-0,0075	71	-0,2404	0,2262	0,9503
Xanthine	Leucine	0,1838	71	-0,0517	0,4000	0,1249
Xanthine	Lysine	0,0897	71	-0,1467	0,3164	0,4570
Xanthine	Maltose	0,1973	71	-0,0377	0,4117	0,0990
Xanthine	Methanol	0,2441	71	0,0114	0,4516	0,0403
Xanthine	Methylamine	0,2419	71	0,0091	0,4498	0,0421
Xanthine	Nicotinate	0,8479	71	0,7661	0,9026	<,0001
Xanthine	N-nitrosodimethylamine	0,3705	71	0,1502	0,5558	0,0015
Xanthine	N-Phenylacetylglycine	0,4102	71	0,1956	0,5873	0,0004
Xanthine	Ornithine	0,4399	71	0,2302	0,6105	0,0001
Xanthine	Phenylacetate	0,4351	71	0,2246	0,6068	0,0001
Xanthine	Phenylalanine	0,5062	71	0,3095	0,6614	<,0001
Xanthine	Pimelate	0,2238	71	-0,0100	0,4344	0,0606
Xanthine	Proline	0,1897	71	-0,0457	0,4050	0,1132
Xanthine	Propionate	0,3554	71	0,1331	0,5436	0,0024
Xanthine	Ribose	0,2239	71	-0,0100	0,4345	0,0606
Xanthine	Serine	0,0840	71	-0,1523	0,3112	0,4862
Xanthine	Succinate	-0,0042	71	-0,2372	0,2294	0,9725
Xanthine	Trimethylamine	0,4322	71	0,2212	0,6046	0,0002
Xanthine	Tyrosine	0,4223	71	0,2097	0,5968	0,0002
Xanthine	Uracil	0,8610	71	0,7855	0,9113	<,0001
Xanthine	Urea	0,2665	71	0,0354	0,4705	0,0247
Xanthine	Valerate	0,2816	71	0,0516	0,4831	0,0174
Xanthine	Valine	0,2509	71	0,0187	0,4574	0,0348

## Sheet: Duodenum
Supplementary Data 5
Pairwise Correlations - Duodenal fluid
Variable1	by Variable2	Correlation	Sample Count	Lower 95%	Upper 95%	Signif Prob
2-Phenylpropionate	1,3-Dihydroxyacetone	0,8602	67	0,7814	0,9119	<,0001
3-Hydroxybutyrate	1,3-Dihydroxyacetone	0,8373	67	0,7474	0,8971	<,0001
3-Hydroxybutyrate	2-Phenylpropionate	0,9329	67	0,8927	0,9583	<,0001
3-Hydroxyphenylacetate	1,3-Dihydroxyacetone	0,8610	67	0,7827	0,9125	<,0001
3-Hydroxyphenylacetate	2-Phenylpropionate	0,9389	67	0,9021	0,9621	<,0001
3-Hydroxyphenylacetate	3-Hydroxybutyrate	0,8676	67	0,7926	0,9167	<,0001
3-Phenylpropionate	1,3-Dihydroxyacetone	0,7983	67	0,6906	0,8714	<,0001
3-Phenylpropionate	2-Phenylpropionate	0,9512	67	0,9216	0,9698	<,0001
3-Phenylpropionate	3-Hydroxybutyrate	0,9055	67	0,8502	0,9410	<,0001
3-Phenylpropionate	3-Hydroxyphenylacetate	0,9396	67	0,9032	0,9626	<,0001
4-Hydroxybutyrate	1,3-Dihydroxyacetone	0,8455	67	0,7596	0,9024	<,0001
4-Hydroxybutyrate	2-Phenylpropionate	0,9312	67	0,8901	0,9573	<,0001
4-Hydroxybutyrate	3-Hydroxybutyrate	0,8854	67	0,8195	0,9282	<,0001
4-Hydroxybutyrate	3-Hydroxyphenylacetate	0,9541	67	0,9262	0,9716	<,0001
4-Hydroxybutyrate	3-Phenylpropionate	0,8936	67	0,8320	0,9335	<,0001
Acetate	1,3-Dihydroxyacetone	0,0096	67	-0,2312	0,2492	0,9386
Acetate	2-Phenylpropionate	0,1587	67	-0,0847	0,3843	0,1995
Acetate	3-Hydroxybutyrate	0,1184	67	-0,1254	0,3487	0,3400
Acetate	3-Hydroxyphenylacetate	0,1630	67	-0,0804	0,3880	0,1876
Acetate	3-Phenylpropionate	0,0664	67	-0,1766	0,3018	0,5932
Acetate	4-Hydroxybutyrate	0,2423	67	0,0022	0,4560	0,0482
Acetoacetate	1,3-Dihydroxyacetone	0,6699	67	0,5121	0,7840	<,0001
Acetoacetate	2-Phenylpropionate	0,8505	67	0,7670	0,9057	<,0001
Acetoacetate	3-Hydroxybutyrate	0,7991	67	0,6916	0,8719	<,0001
Acetoacetate	3-Hydroxyphenylacetate	0,8727	67	0,8003	0,9201	<,0001
Acetoacetate	3-Phenylpropionate	0,7965	67	0,6880	0,8702	<,0001
Acetoacetate	4-Hydroxybutyrate	0,9340	67	0,8944	0,9590	<,0001
Acetoacetate	Acetate	0,5051	67	0,3014	0,6646	<,0001
Acetone	1,3-Dihydroxyacetone	0,7930	67	0,6828	0,8679	<,0001
Acetone	2-Phenylpropionate	0,9376	67	0,9002	0,9613	<,0001
Acetone	3-Hydroxybutyrate	0,8781	67	0,8084	0,9235	<,0001
Acetone	3-Hydroxyphenylacetate	0,9634	67	0,9410	0,9774	<,0001
Acetone	3-Phenylpropionate	0,9098	67	0,8568	0,9437	<,0001
Acetone	4-Hydroxybutyrate	0,9494	67	0,9187	0,9687	<,0001
Acetone	Acetate	0,3085	67	0,0737	0,5108	0,0111
Acetone	Acetoacetate	0,9322	67	0,8917	0,9579	<,0001
Adipate	1,3-Dihydroxyacetone	0,7194	67	0,5793	0,8182	<,0001
Adipate	2-Phenylpropionate	0,8861	67	0,8206	0,9287	<,0001
Adipate	3-Hydroxybutyrate	0,8242	67	0,7282	0,8885	<,0001
Adipate	3-Hydroxyphenylacetate	0,9362	67	0,8979	0,9604	<,0001
Adipate	3-Phenylpropionate	0,8687	67	0,7943	0,9175	<,0001
Adipate	4-Hydroxybutyrate	0,9441	67	0,9104	0,9654	<,0001
Adipate	Acetate	0,4149	67	0,1941	0,5958	0,0005
Adipate	Acetoacetate	0,9723	67	0,9551	0,9829	<,0001
Adipate	Acetone	0,9675	67	0,9474	0,9799	<,0001
Alanine	1,3-Dihydroxyacetone	0,6624	67	0,5020	0,7787	<,0001
Alanine	2-Phenylpropionate	0,8253	67	0,7297	0,8892	<,0001
Alanine	3-Hydroxybutyrate	0,7718	67	0,6526	0,8538	<,0001
Alanine	3-Hydroxyphenylacetate	0,8049	67	0,7000	0,8758	<,0001
Alanine	3-Phenylpropionate	0,7620	67	0,6387	0,8472	<,0001
Alanine	4-Hydroxybutyrate	0,8365	67	0,7463	0,8966	<,0001
Alanine	Acetate	0,4251	67	0,2059	0,6036	0,0003
Alanine	Acetoacetate	0,8799	67	0,8112	0,9247	<,0001
Alanine	Acetone	0,8721	67	0,7993	0,9196	<,0001
Alanine	Adipate	0,8669	67	0,7915	0,9163	<,0001
Allantoin	1,3-Dihydroxyacetone	0,2309	67	-0,0099	0,4463	0,0601
Allantoin	2-Phenylpropionate	0,3732	67	0,1461	0,5630	0,0019
Allantoin	3-Hydroxybutyrate	0,4196	67	0,1994	0,5994	0,0004
Allantoin	3-Hydroxyphenylacetate	0,1810	67	-0,0619	0,4037	0,1427
Allantoin	3-Phenylpropionate	0,3589	67	0,1299	0,5516	0,0029
Allantoin	4-Hydroxybutyrate	0,1585	67	-0,0849	0,3841	0,2001
Allantoin	Acetate	0,0006	67	-0,2396	0,2408	0,9961
Allantoin	Acetoacetate	0,1813	67	-0,0616	0,4039	0,1420
Allantoin	Acetone	0,1869	67	-0,0558	0,4088	0,1299
Allantoin	Adipate	0,1777	67	-0,0653	0,4008	0,1503
Allantoin	Alanine	0,2553	67	0,0161	0,4669	0,0370
Aspartate	1,3-Dihydroxyacetone	0,8589	67	0,7795	0,9111	<,0001
Aspartate	2-Phenylpropionate	0,9550	67	0,9275	0,9722	<,0001
Aspartate	3-Hydroxybutyrate	0,9146	67	0,8642	0,9468	<,0001
Aspartate	3-Hydroxyphenylacetate	0,9614	67	0,9377	0,9762	<,0001
Aspartate	3-Phenylpropionate	0,9243	67	0,8793	0,9529	<,0001
Aspartate	4-Hydroxybutyrate	0,9825	67	0,9716	0,9892	<,0001
Aspartate	Acetate	0,1971	67	-0,0452	0,4175	0,1099
Aspartate	Acetoacetate	0,9048	67	0,8491	0,9406	<,0001
Aspartate	Acetone	0,9571	67	0,9310	0,9735	<,0001
Aspartate	Adipate	0,9298	67	0,8879	0,9564	<,0001
Aspartate	Alanine	0,8289	67	0,7351	0,8916	<,0001
Aspartate	Allantoin	0,1945	67	-0,0479	0,4153	0,1147
Benzoate	1,3-Dihydroxyacetone	0,6959	67	0,5472	0,8020	<,0001
Benzoate	2-Phenylpropionate	0,9031	67	0,8466	0,9395	<,0001
Benzoate	3-Hydroxybutyrate	0,8378	67	0,7482	0,8974	<,0001
Benzoate	3-Hydroxyphenylacetate	0,9272	67	0,8838	0,9547	<,0001
Benzoate	3-Phenylpropionate	0,9720	67	0,9548	0,9828	<,0001
Benzoate	4-Hydroxybutyrate	0,8589	67	0,7795	0,9111	<,0001
Benzoate	Acetate	0,0870	67	-0,1565	0,3205	0,4841
Benzoate	Acetoacetate	0,7984	67	0,6907	0,8715	<,0001
Benzoate	Acetone	0,8994	67	0,8408	0,9371	<,0001
Benzoate	Adipate	0,8815	67	0,8136	0,9257	<,0001
Benzoate	Alanine	0,7540	67	0,6274	0,8418	<,0001
Benzoate	Allantoin	0,3211	67	0,0876	0,5211	0,0081
Benzoate	Aspartate	0,8826	67	0,8152	0,9264	<,0001
Butyrate	1,3-Dihydroxyacetone	0,6039	67	0,4254	0,7372	<,0001
Butyrate	2-Phenylpropionate	0,8019	67	0,6958	0,8738	<,0001
Butyrate	3-Hydroxybutyrate	0,7357	67	0,6019	0,8294	<,0001
Butyrate	3-Hydroxyphenylacetate	0,8045	67	0,6994	0,8755	<,0001
Butyrate	3-Phenylpropionate	0,7274	67	0,5903	0,8237	<,0001
Butyrate	4-Hydroxybutyrate	0,8469	67	0,7617	0,9034	<,0001
Butyrate	Acetate	0,6096	67	0,4328	0,7413	<,0001
Butyrate	Acetoacetate	0,9636	67	0,9413	0,9775	<,0001
Butyrate	Acetone	0,9037	67	0,8475	0,9399	<,0001
Butyrate	Adipate	0,9322	67	0,8917	0,9579	<,0001
Butyrate	Alanine	0,8724	67	0,7998	0,9198	<,0001
Butyrate	Allantoin	0,2153	67	-0,0262	0,4331	0,0801
Butyrate	Aspartate	0,8267	67	0,7319	0,8902	<,0001
Butyrate	Benzoate	0,7267	67	0,5893	0,8232	<,0001
Cadaverine	1,3-Dihydroxyacetone	0,8343	67	0,7430	0,8951	<,0001
Cadaverine	2-Phenylpropionate	0,9249	67	0,8803	0,9533	<,0001
Cadaverine	3-Hydroxybutyrate	0,8600	67	0,7812	0,9119	<,0001
Cadaverine	3-Hydroxyphenylacetate	0,9121	67	0,8605	0,9452	<,0001
Cadaverine	3-Phenylpropionate	0,9242	67	0,8792	0,9529	<,0001
Cadaverine	4-Hydroxybutyrate	0,9051	67	0,8496	0,9408	<,0001
Cadaverine	Acetate	0,1426	67	-0,1011	0,3701	0,2498
Cadaverine	Acetoacetate	0,8052	67	0,7004	0,8760	<,0001
Cadaverine	Acetone	0,8844	67	0,8179	0,9275	<,0001
Cadaverine	Adipate	0,8584	67	0,7788	0,9108	<,0001
Cadaverine	Alanine	0,7753	67	0,6575	0,8561	<,0001
Cadaverine	Allantoin	0,2289	67	-0,0120	0,4447	0,0624
Cadaverine	Aspartate	0,9248	67	0,8801	0,9533	<,0001
Cadaverine	Benzoate	0,8789	67	0,8096	0,9240	<,0001
Cadaverine	Butyrate	0,7373	67	0,6040	0,8304	<,0001
Caffeine	1,3-Dihydroxyacetone	0,8796	67	0,8107	0,9245	<,0001
Caffeine	2-Phenylpropionate	0,9513	67	0,9218	0,9699	<,0001
Caffeine	3-Hydroxybutyrate	0,8794	67	0,8104	0,9243	<,0001
Caffeine	3-Hydroxyphenylacetate	0,9821	67	0,9709	0,9890	<,0001
Caffeine	3-Phenylpropionate	0,9550	67	0,9276	0,9722	<,0001
Caffeine	4-Hydroxybutyrate	0,9332	67	0,8932	0,9585	<,0001
Caffeine	Acetate	0,0629	67	-0,1800	0,2986	0,6131
Caffeine	Acetoacetate	0,8098	67	0,7072	0,8790	<,0001
Caffeine	Acetone	0,9382	67	0,9010	0,9617	<,0001
Caffeine	Adipate	0,8810	67	0,8129	0,9254	<,0001
Caffeine	Alanine	0,7743	67	0,6562	0,8554	<,0001
Caffeine	Allantoin	0,1982	67	-0,0441	0,4185	0,1079
Caffeine	Aspartate	0,9517	67	0,9224	0,9702	<,0001
Caffeine	Benzoate	0,9312	67	0,8901	0,9573	<,0001
Caffeine	Butyrate	0,7278	67	0,5909	0,8240	<,0001
Caffeine	Cadaverine	0,9172	67	0,8684	0,9485	<,0001
Carnitine	1,3-Dihydroxyacetone	0,6878	67	0,5362	0,7964	<,0001
Carnitine	2-Phenylpropionate	0,8239	67	0,7278	0,8883	<,0001
Carnitine	3-Hydroxybutyrate	0,8148	67	0,7144	0,8823	<,0001
Carnitine	3-Hydroxyphenylacetate	0,8203	67	0,7225	0,8860	<,0001
Carnitine	3-Phenylpropionate	0,7543	67	0,6279	0,8420	<,0001
Carnitine	4-Hydroxybutyrate	0,9048	67	0,8492	0,9406	<,0001
Carnitine	Acetate	0,4037	67	0,1810	0,5870	0,0007
Carnitine	Acetoacetate	0,9512	67	0,9216	0,9698	<,0001
Carnitine	Acetone	0,8745	67	0,8030	0,9212	<,0001
Carnitine	Adipate	0,9046	67	0,8489	0,9405	<,0001
Carnitine	Alanine	0,8554	67	0,7743	0,9089	<,0001
Carnitine	Allantoin	0,2309	67	-0,0099	0,4463	0,0602
Carnitine	Aspartate	0,8694	67	0,7953	0,9179	<,0001
Carnitine	Benzoate	0,7259	67	0,5883	0,8227	<,0001
Carnitine	Butyrate	0,9168	67	0,8676	0,9482	<,0001
Carnitine	Cadaverine	0,7919	67	0,6813	0,8672	<,0001
Carnitine	Caffeine	0,7551	67	0,6290	0,8425	<,0001
Choline	1,3-Dihydroxyacetone	0,8264	67	0,7313	0,8899	<,0001
Choline	2-Phenylpropionate	0,9154	67	0,8655	0,9473	<,0001
Choline	3-Hydroxybutyrate	0,8655	67	0,7894	0,9154	<,0001
Choline	3-Hydroxyphenylacetate	0,9503	67	0,9201	0,9693	<,0001
Choline	3-Phenylpropionate	0,9036	67	0,8474	0,9398	<,0001
Choline	4-Hydroxybutyrate	0,9537	67	0,9255	0,9714	<,0001
Choline	Acetate	0,1686	67	-0,0746	0,3929	0,1725
Choline	Acetoacetate	0,8837	67	0,8169	0,9271	<,0001
Choline	Acetone	0,9360	67	0,8976	0,9603	<,0001
Choline	Adipate	0,9185	67	0,8703	0,9493	<,0001
Choline	Alanine	0,8268	67	0,7319	0,8902	<,0001
Choline	Allantoin	0,1473	67	-0,0963	0,3743	0,2343
Choline	Aspartate	0,9468	67	0,9147	0,9671	<,0001
Choline	Benzoate	0,8812	67	0,8131	0,9255	<,0001
Choline	Butyrate	0,8029	67	0,6972	0,8745	<,0001
Choline	Cadaverine	0,9181	67	0,8697	0,9490	<,0001
Choline	Caffeine	0,9366	67	0,8985	0,9607	<,0001
Choline	Carnitine	0,8661	67	0,7904	0,9158	<,0001
Dimethylamine	1,3-Dihydroxyacetone	0,3851	67	0,1597	0,5724	0,0013
Dimethylamine	2-Phenylpropionate	0,3492	67	0,1190	0,5438	0,0038
Dimethylamine	3-Hydroxybutyrate	0,4092	67	0,1874	0,5913	0,0006
Dimethylamine	3-Hydroxyphenylacetate	0,1394	67	-0,1043	0,3673	0,2606
Dimethylamine	3-Phenylpropionate	0,3052	67	0,0701	0,5082	0,0120
Dimethylamine	4-Hydroxybutyrate	0,1330	67	-0,1108	0,3616	0,2835
Dimethylamine	Acetate	-0,0819	67	-0,3159	0,1614	0,5098
Dimethylamine	Acetoacetate	0,0179	67	-0,2233	0,2570	0,8858
Dimethylamine	Acetone	0,1274	67	-0,1163	0,3567	0,3041
Dimethylamine	Adipate	0,0273	67	-0,2143	0,2658	0,8263
Dimethylamine	Alanine	0,1637	67	-0,0796	0,3886	0,1856
Dimethylamine	Allantoin	0,4669	67	0,2554	0,6358	<,0001
Dimethylamine	Aspartate	0,2103	67	-0,0315	0,4289	0,0876
Dimethylamine	Benzoate	0,1812	67	-0,0616	0,4039	0,1421
Dimethylamine	Butyrate	0,0218	67	-0,2196	0,2606	0,8611
Dimethylamine	Cadaverine	0,3040	67	0,0688	0,5072	0,0124
Dimethylamine	Caffeine	0,2396	67	-0,0007	0,4537	0,0508
Dimethylamine	Carnitine	0,0563	67	-0,1864	0,2926	0,6507
Dimethylamine	Choline	0,1371	67	-0,1066	0,3653	0,2685
Ethanol	1,3-Dihydroxyacetone	0,8112	67	0,7092	0,8800	<,0001
Ethanol	2-Phenylpropionate	0,9371	67	0,8993	0,9610	<,0001
Ethanol	3-Hydroxybutyrate	0,9151	67	0,8650	0,9471	<,0001
Ethanol	3-Hydroxyphenylacetate	0,9447	67	0,9112	0,9657	<,0001
Ethanol	3-Phenylpropionate	0,9128	67	0,8615	0,9457	<,0001
Ethanol	4-Hydroxybutyrate	0,9433	67	0,9091	0,9649	<,0001
Ethanol	Acetate	0,1925	67	-0,0500	0,4136	0,1186
Ethanol	Acetoacetate	0,8792	67	0,8101	0,9243	<,0001
Ethanol	Acetone	0,9659	67	0,9449	0,9790	<,0001
Ethanol	Adipate	0,9199	67	0,8725	0,9502	<,0001
Ethanol	Alanine	0,8444	67	0,7579	0,9017	<,0001
Ethanol	Allantoin	0,1858	67	-0,0569	0,4078	0,1322
Ethanol	Aspartate	0,9648	67	0,9431	0,9783	<,0001
Ethanol	Benzoate	0,8884	67	0,8240	0,9301	<,0001
Ethanol	Butyrate	0,8209	67	0,7233	0,8863	<,0001
Ethanol	Cadaverine	0,8872	67	0,8222	0,9294	<,0001
Ethanol	Caffeine	0,9391	67	0,9025	0,9622	<,0001
Ethanol	Carnitine	0,8532	67	0,7710	0,9074	<,0001
Ethanol	Choline	0,9346	67	0,8954	0,9594	<,0001
Ethanol	Dimethylamine	0,1811	67	-0,0618	0,4037	0,1426
Ferulate	1,3-Dihydroxyacetone	0,9076	67	0,8534	0,9423	<,0001
Ferulate	2-Phenylpropionate	0,9611	67	0,9373	0,9760	<,0001
Ferulate	3-Hydroxybutyrate	0,8876	67	0,8229	0,9296	<,0001
Ferulate	3-Hydroxyphenylacetate	0,9589	67	0,9337	0,9746	<,0001
Ferulate	3-Phenylpropionate	0,9167	67	0,8676	0,9482	<,0001
Ferulate	4-Hydroxybutyrate	0,9333	67	0,8934	0,9586	<,0001
Ferulate	Acetate	0,1318	67	-0,1119	0,3606	0,2875
Ferulate	Acetoacetate	0,8316	67	0,7391	0,8934	<,0001
Ferulate	Acetone	0,9270	67	0,8835	0,9546	<,0001
Ferulate	Adipate	0,8750	67	0,8038	0,9215	<,0001
Ferulate	Alanine	0,7956	67	0,6866	0,8696	<,0001
Ferulate	Allantoin	0,2848	67	0,0478	0,4914	0,0195
Ferulate	Aspartate	0,9506	67	0,9206	0,9694	<,0001
Ferulate	Benzoate	0,8660	67	0,7902	0,9157	<,0001
Ferulate	Butyrate	0,7711	67	0,6516	0,8533	<,0001
Ferulate	Cadaverine	0,9088	67	0,8553	0,9431	<,0001
Ferulate	Caffeine	0,9606	67	0,9364	0,9757	<,0001
Ferulate	Carnitine	0,8081	67	0,7047	0,8779	<,0001
Ferulate	Choline	0,9242	67	0,8792	0,9529	<,0001
Ferulate	Dimethylamine	0,3010	67	0,0655	0,5047	0,0133
Ferulate	Ethanol	0,9158	67	0,8662	0,9476	<,0001
Formate	1,3-Dihydroxyacetone	0,7484	67	0,6196	0,8380	<,0001
Formate	2-Phenylpropionate	0,9375	67	0,8999	0,9612	<,0001
Formate	3-Hydroxybutyrate	0,8713	67	0,7981	0,9191	<,0001
Formate	3-Hydroxyphenylacetate	0,9436	67	0,9095	0,9650	<,0001
Formate	3-Phenylpropionate	0,9699	67	0,9514	0,9815	<,0001
Formate	4-Hydroxybutyrate	0,8881	67	0,8236	0,9299	<,0001
Formate	Acetate	0,0893	67	-0,1542	0,3226	0,4725
Formate	Acetoacetate	0,8145	67	0,7139	0,8821	<,0001
Formate	Acetone	0,9333	67	0,8933	0,9586	<,0001
Formate	Adipate	0,8829	67	0,8157	0,9266	<,0001
Formate	Alanine	0,7858	67	0,6725	0,8631	<,0001
Formate	Allantoin	0,2791	67	0,0417	0,4867	0,0222
Formate	Aspartate	0,9183	67	0,8700	0,9491	<,0001
Formate	Benzoate	0,9785	67	0,9651	0,9868	<,0001
Formate	Butyrate	0,7445	67	0,6142	0,8353	<,0001
Formate	Cadaverine	0,8782	67	0,8086	0,9236	<,0001
Formate	Caffeine	0,9631	67	0,9404	0,9772	<,0001
Formate	Carnitine	0,7396	67	0,6073	0,8320	<,0001
Formate	Choline	0,9029	67	0,8462	0,9393	<,0001
Formate	Dimethylamine	0,2236	67	-0,0175	0,4402	0,0689
Formate	Ethanol	0,9313	67	0,8903	0,9574	<,0001
Formate	Ferulate	0,9028	67	0,8460	0,9393	<,0001
Fumarate	1,3-Dihydroxyacetone	0,6444	67	0,4782	0,7661	<,0001
Fumarate	2-Phenylpropionate	0,8581	67	0,7783	0,9106	<,0001
Fumarate	3-Hydroxybutyrate	0,8161	67	0,7163	0,8831	<,0001
Fumarate	3-Hydroxyphenylacetate	0,7809	67	0,6655	0,8598	<,0001
Fumarate	3-Phenylpropionate	0,8781	67	0,8083	0,9235	<,0001
Fumarate	4-Hydroxybutyrate	0,7220	67	0,5829	0,8200	<,0001
Fumarate	Acetate	0,0518	67	-0,1908	0,2884	0,6771
Fumarate	Acetoacetate	0,6703	67	0,5127	0,7843	<,0001
Fumarate	Acetone	0,7766	67	0,6594	0,8569	<,0001
Fumarate	Adipate	0,7321	67	0,5968	0,8269	<,0001
Fumarate	Alanine	0,6867	67	0,5348	0,7957	<,0001
Fumarate	Allantoin	0,6276	67	0,4561	0,7541	<,0001
Fumarate	Aspartate	0,7630	67	0,6401	0,8478	<,0001
Fumarate	Benzoate	0,8872	67	0,8222	0,9293	<,0001
Fumarate	Butyrate	0,6315	67	0,4613	0,7569	<,0001
Fumarate	Cadaverine	0,7981	67	0,6902	0,8713	<,0001
Fumarate	Caffeine	0,8080	67	0,7045	0,8778	<,0001
Fumarate	Carnitine	0,6294	67	0,4585	0,7554	<,0001
Fumarate	Choline	0,7392	67	0,6067	0,8317	<,0001
Fumarate	Dimethylamine	0,3925	67	0,1681	0,5782	0,0010
Fumarate	Ethanol	0,7692	67	0,6489	0,8520	<,0001
Fumarate	Ferulate	0,7939	67	0,6841	0,8685	<,0001
Fumarate	Formate	0,8714	67	0,7983	0,9192	<,0001
Glucose	1,3-Dihydroxyacetone	0,5741	67	0,3872	0,7156	<,0001
Glucose	2-Phenylpropionate	0,8738	67	0,8019	0,9207	<,0001
Glucose	3-Hydroxybutyrate	0,8125	67	0,7111	0,8808	<,0001
Glucose	3-Hydroxyphenylacetate	0,8317	67	0,7392	0,8934	<,0001
Glucose	3-Phenylpropionate	0,8662	67	0,7905	0,9159	<,0001
Glucose	4-Hydroxybutyrate	0,8561	67	0,7753	0,9093	<,0001
Glucose	Acetate	0,2407	67	0,0006	0,4547	0,0497
Glucose	Acetoacetate	0,8753	67	0,8041	0,9217	<,0001
Glucose	Acetone	0,8861	67	0,8206	0,9287	<,0001
Glucose	Adipate	0,8690	67	0,7947	0,9177	<,0001
Glucose	Alanine	0,7991	67	0,6916	0,8719	<,0001
Glucose	Allantoin	0,2926	67	0,0563	0,4978	0,0163
Glucose	Aspartate	0,8761	67	0,8054	0,9222	<,0001
Glucose	Benzoate	0,8852	67	0,8192	0,9281	<,0001
Glucose	Butyrate	0,8229	67	0,7262	0,8876	<,0001
Glucose	Cadaverine	0,7790	67	0,6628	0,8586	<,0001
Glucose	Caffeine	0,8271	67	0,7324	0,8904	<,0001
Glucose	Carnitine	0,8086	67	0,7054	0,8782	<,0001
Glucose	Choline	0,8326	67	0,7405	0,8940	<,0001
Glucose	Dimethylamine	0,1375	67	-0,1062	0,3656	0,2673
Glucose	Ethanol	0,8766	67	0,8061	0,9225	<,0001
Glucose	Ferulate	0,7984	67	0,6907	0,8715	<,0001
Glucose	Formate	0,9155	67	0,8656	0,9474	<,0001
Glucose	Fumarate	0,8043	67	0,6992	0,8754	<,0001
Glutamate	1,3-Dihydroxyacetone	0,8097	67	0,7071	0,8790	<,0001
Glutamate	2-Phenylpropionate	0,9073	67	0,8530	0,9422	<,0001
Glutamate	3-Hydroxybutyrate	0,8442	67	0,7576	0,9016	<,0001
Glutamate	3-Hydroxyphenylacetate	0,9622	67	0,9390	0,9767	<,0001
Glutamate	3-Phenylpropionate	0,9012	67	0,8436	0,9383	<,0001
Glutamate	4-Hydroxybutyrate	0,9510	67	0,9212	0,9697	<,0001
Glutamate	Acetate	0,2485	67	0,0088	0,4612	0,0426
Glutamate	Acetoacetate	0,8988	67	0,8399	0,9368	<,0001
Glutamate	Acetone	0,9581	67	0,9325	0,9741	<,0001
Glutamate	Adipate	0,9541	67	0,9262	0,9716	<,0001
Glutamate	Alanine	0,8312	67	0,7384	0,8931	<,0001
Glutamate	Allantoin	0,1221	67	-0,1217	0,3520	0,3251
Glutamate	Aspartate	0,9604	67	0,9362	0,9756	<,0001
Glutamate	Benzoate	0,8910	67	0,8280	0,9318	<,0001
Glutamate	Butyrate	0,8387	67	0,7495	0,8980	<,0001
Glutamate	Cadaverine	0,9039	67	0,8477	0,9400	<,0001
Glutamate	Caffeine	0,9324	67	0,8919	0,9580	<,0001
Glutamate	Carnitine	0,8306	67	0,7375	0,8927	<,0001
Glutamate	Choline	0,9410	67	0,9054	0,9634	<,0001
Glutamate	Dimethylamine	0,1069	67	-0,1368	0,3384	0,3893
Glutamate	Ethanol	0,9378	67	0,9004	0,9614	<,0001
Glutamate	Ferulate	0,9216	67	0,8751	0,9512	<,0001
Glutamate	Formate	0,9007	67	0,8429	0,9380	<,0001
Glutamate	Fumarate	0,7331	67	0,5983	0,8276	<,0001
Glutamate	Glucose	0,8238	67	0,7276	0,8883	<,0001
Glycerol	1,3-Dihydroxyacetone	0,8726	67	0,8001	0,9200	<,0001
Glycerol	2-Phenylpropionate	0,9380	67	0,9008	0,9616	<,0001
Glycerol	3-Hydroxybutyrate	0,8943	67	0,8331	0,9339	<,0001
Glycerol	3-Hydroxyphenylacetate	0,9802	67	0,9680	0,9878	<,0001
Glycerol	3-Phenylpropionate	0,9262	67	0,8822	0,9541	<,0001
Glycerol	4-Hydroxybutyrate	0,9849	67	0,9755	0,9908	<,0001
Glycerol	Acetate	0,1555	67	-0,0880	0,3814	0,2090
Glycerol	Acetoacetate	0,8903	67	0,8270	0,9313	<,0001
Glycerol	Acetone	0,9544	67	0,9266	0,9718	<,0001
Glycerol	Adipate	0,9320	67	0,8914	0,9578	<,0001
Glycerol	Alanine	0,8109	67	0,7088	0,8798	<,0001
Glycerol	Allantoin	0,1491	67	-0,0945	0,3758	0,2285
Glycerol	Aspartate	0,9824	67	0,9714	0,9892	<,0001
Glycerol	Benzoate	0,8981	67	0,8388	0,9363	<,0001
Glycerol	Butyrate	0,7958	67	0,6869	0,8697	<,0001
Glycerol	Cadaverine	0,9242	67	0,8792	0,9529	<,0001
Glycerol	Caffeine	0,9703	67	0,9519	0,9817	<,0001
Glycerol	Carnitine	0,8551	67	0,7739	0,9087	<,0001
Glycerol	Choline	0,9617	67	0,9382	0,9763	<,0001
Glycerol	Dimethylamine	0,1484	67	-0,0952	0,3752	0,2308
Glycerol	Ethanol	0,9586	67	0,9333	0,9744	<,0001
Glycerol	Ferulate	0,9474	67	0,9155	0,9674	<,0001
Glycerol	Formate	0,9230	67	0,8774	0,9521	<,0001
Glycerol	Fumarate	0,7520	67	0,6246	0,8404	<,0001
Glycerol	Glucose	0,8359	67	0,7453	0,8961	<,0001
Glycerol	Glutamate	0,9607	67	0,9366	0,9757	<,0001
Glycine	1,3-Dihydroxyacetone	0,0439	67	-0,1984	0,2811	0,7243
Glycine	2-Phenylpropionate	0,2150	67	-0,0265	0,4329	0,0805
Glycine	3-Hydroxybutyrate	0,1674	67	-0,0759	0,3918	0,1758
Glycine	3-Hydroxyphenylacetate	0,1881	67	-0,0546	0,4098	0,1275
Glycine	3-Phenylpropionate	0,0754	67	-0,1678	0,3100	0,5442
Glycine	4-Hydroxybutyrate	0,3253	67	0,0923	0,5245	0,0072
Glycine	Acetate	0,7869	67	0,6740	0,8638	<,0001
Glycine	Acetoacetate	0,5974	67	0,4170	0,7325	<,0001
Glycine	Acetone	0,3426	67	0,1115	0,5385	0,0045
Glycine	Adipate	0,4555	67	0,2418	0,6271	0,0001
Glycine	Alanine	0,4990	67	0,2940	0,6601	<,0001
Glycine	Allantoin	0,1219	67	-0,1218	0,3519	0,3256
Glycine	Aspartate	0,2581	67	0,0191	0,4692	0,0350
Glycine	Benzoate	0,0932	67	-0,1504	0,3261	0,4531
Glycine	Butyrate	0,6985	67	0,5507	0,8038	<,0001
Glycine	Cadaverine	0,1604	67	-0,0830	0,3857	0,1949
Glycine	Caffeine	0,0639	67	-0,1791	0,2995	0,6075
Glycine	Carnitine	0,5957	67	0,4148	0,7312	<,0001
Glycine	Choline	0,2356	67	-0,0049	0,4503	0,0549
Glycine	Dimethylamine	-0,1834	67	-0,4058	0,0594	0,1373
Glycine	Ethanol	0,2153	67	-0,0263	0,4331	0,0802
Glycine	Ferulate	0,1858	67	-0,0569	0,4079	0,1321
Glycine	Formate	0,0874	67	-0,1561	0,3209	0,4817
Glycine	Fumarate	0,0964	67	-0,1473	0,3290	0,4379
Glycine	Glucose	0,3416	67	0,1105	0,5377	0,0047
Glycine	Glutamate	0,2741	67	0,0363	0,4825	0,0248
Glycine	Glycerol	0,2011	67	-0,0411	0,4209	0,1028
Histidine	1,3-Dihydroxyacetone	0,7242	67	0,5859	0,8215	<,0001
Histidine	2-Phenylpropionate	0,9155	67	0,8657	0,9474	<,0001
Histidine	3-Hydroxybutyrate	0,8559	67	0,7750	0,9092	<,0001
Histidine	3-Hydroxyphenylacetate	0,9362	67	0,8979	0,9604	<,0001
Histidine	3-Phenylpropionate	0,9813	67	0,9697	0,9885	<,0001
Histidine	4-Hydroxybutyrate	0,8709	67	0,7975	0,9189	<,0001
Histidine	Acetate	0,0647	67	-0,1783	0,3002	0,6031
Histidine	Acetoacetate	0,7945	67	0,6850	0,8689	<,0001
Histidine	Acetone	0,9041	67	0,8481	0,9402	<,0001
Histidine	Adipate	0,8778	67	0,8079	0,9233	<,0001
Histidine	Alanine	0,7509	67	0,6231	0,8397	<,0001
Histidine	Allantoin	0,3093	67	0,0747	0,5115	0,0109
Histidine	Aspartate	0,8981	67	0,8389	0,9363	<,0001
Histidine	Benzoate	0,9961	67	0,9937	0,9976	<,0001
Histidine	Butyrate	0,7166	67	0,5754	0,8163	<,0001
Histidine	Cadaverine	0,8840	67	0,8174	0,9273	<,0001
Histidine	Caffeine	0,9466	67	0,9142	0,9669	<,0001
Histidine	Carnitine	0,7233	67	0,5847	0,8209	<,0001
Histidine	Choline	0,8905	67	0,8273	0,9315	<,0001
Histidine	Dimethylamine	0,2060	67	-0,0360	0,4252	0,0944
Histidine	Ethanol	0,9020	67	0,8448	0,9388	<,0001
Histidine	Ferulate	0,8812	67	0,8130	0,9255	<,0001
Histidine	Formate	0,9852	67	0,9760	0,9909	<,0001
Histidine	Fumarate	0,8744	67	0,8029	0,9212	<,0001
Histidine	Glucose	0,8861	67	0,8205	0,9286	<,0001
Histidine	Glutamate	0,8973	67	0,8376	0,9358	<,0001
Histidine	Glycerol	0,9110	67	0,8587	0,9445	<,0001
Histidine	Glycine	0,0630	67	-0,1799	0,2987	0,6123
Hypoxanthine	1,3-Dihydroxyacetone	0,7400	67	0,6078	0,8323	<,0001
Hypoxanthine	2-Phenylpropionate	0,9340	67	0,8945	0,9591	<,0001
Hypoxanthine	3-Hydroxybutyrate	0,8626	67	0,7850	0,9135	<,0001
Hypoxanthine	3-Hydroxyphenylacetate	0,9449	67	0,9116	0,9659	<,0001
Hypoxanthine	3-Phenylpropionate	0,9774	67	0,9634	0,9861	<,0001
Hypoxanthine	4-Hydroxybutyrate	0,8868	67	0,8217	0,9291	<,0001
Hypoxanthine	Acetate	0,0953	67	-0,1483	0,3280	0,4432
Hypoxanthine	Acetoacetate	0,8142	67	0,7135	0,8819	<,0001
Hypoxanthine	Acetone	0,9258	67	0,8816	0,9539	<,0001
Hypoxanthine	Adipate	0,8866	67	0,8213	0,9290	<,0001
Hypoxanthine	Alanine	0,7763	67	0,6590	0,8567	<,0001
Hypoxanthine	Allantoin	0,2877	67	0,0510	0,4938	0,0182
Hypoxanthine	Aspartate	0,9149	67	0,8647	0,9470	<,0001
Hypoxanthine	Benzoate	0,9898	67	0,9834	0,9937	<,0001
Hypoxanthine	Butyrate	0,7426	67	0,6114	0,8340	<,0001
Hypoxanthine	Cadaverine	0,8896	67	0,8259	0,9309	<,0001
Hypoxanthine	Caffeine	0,9602	67	0,9358	0,9754	<,0001
Hypoxanthine	Carnitine	0,7371	67	0,6039	0,8303	<,0001
Hypoxanthine	Choline	0,9007	67	0,8428	0,9380	<,0001
Hypoxanthine	Dimethylamine	0,2183	67	-0,0231	0,4356	0,0760
Hypoxanthine	Ethanol	0,9203	67	0,8731	0,9504	<,0001
Hypoxanthine	Ferulate	0,8988	67	0,8399	0,9368	<,0001
Hypoxanthine	Formate	0,9968	67	0,9948	0,9980	<,0001
Hypoxanthine	Fumarate	0,8781	67	0,8084	0,9235	<,0001
Hypoxanthine	Glucose	0,9097	67	0,8567	0,9437	<,0001
Hypoxanthine	Glutamate	0,9036	67	0,8473	0,9398	<,0001
Hypoxanthine	Glycerol	0,9221	67	0,8759	0,9515	<,0001
Hypoxanthine	Glycine	0,0909	67	-0,1526	0,3241	0,4643
Hypoxanthine	Histidine	0,9938	67	0,9898	0,9962	<,0001
Imidazole	1,3-Dihydroxyacetone	0,6977	67	0,5496	0,8033	<,0001
Imidazole	2-Phenylpropionate	0,8987	67	0,8397	0,9367	<,0001
Imidazole	3-Hydroxybutyrate	0,8364	67	0,7461	0,8965	<,0001
Imidazole	3-Hydroxyphenylacetate	0,9214	67	0,8749	0,9511	<,0001
Imidazole	3-Phenylpropionate	0,9738	67	0,9575	0,9838	<,0001
Imidazole	4-Hydroxybutyrate	0,8489	67	0,7646	0,9046	<,0001
Imidazole	Acetate	0,0593	67	-0,1835	0,2953	0,6335
Imidazole	Acetoacetate	0,7772	67	0,6603	0,8574	<,0001
Imidazole	Acetone	0,8857	67	0,8200	0,9284	<,0001
Imidazole	Adipate	0,8667	67	0,7912	0,9162	<,0001
Imidazole	Alanine	0,7369	67	0,6036	0,8302	<,0001
Imidazole	Allantoin	0,3266	67	0,0938	0,5256	0,0070
Imidazole	Aspartate	0,8757	67	0,8048	0,9220	<,0001
Imidazole	Benzoate	0,9985	67	0,9975	0,9991	<,0001
Imidazole	Butyrate	0,7000	67	0,5527	0,8049	<,0001
Imidazole	Cadaverine	0,8784	67	0,8088	0,9237	<,0001
Imidazole	Caffeine	0,9299	67	0,8880	0,9564	<,0001
Imidazole	Carnitine	0,7056	67	0,5604	0,8088	<,0001
Imidazole	Choline	0,8748	67	0,8034	0,9214	<,0001
Imidazole	Dimethylamine	0,1990	67	-0,0433	0,4192	0,1065
Imidazole	Ethanol	0,8820	67	0,8143	0,9260	<,0001
Imidazole	Ferulate	0,8625	67	0,7850	0,9135	<,0001
Imidazole	Formate	0,9749	67	0,9593	0,9845	<,0001
Imidazole	Fumarate	0,8862	67	0,8207	0,9287	<,0001
Imidazole	Glucose	0,8705	67	0,7970	0,9187	<,0001
Imidazole	Glutamate	0,8850	67	0,8188	0,9279	<,0001
Imidazole	Glycerol	0,8926	67	0,8304	0,9328	<,0001
Imidazole	Glycine	0,0539	67	-0,1887	0,2904	0,6646
Imidazole	Histidine	0,9969	67	0,9949	0,9981	<,0001
Imidazole	Hypoxanthine	0,9871	67	0,9791	0,9921	<,0001
Isobutyrate	1,3-Dihydroxyacetone	0,5386	67	0,3427	0,6896	<,0001
Isobutyrate	2-Phenylpropionate	0,6755	67	0,5196	0,7879	<,0001
Isobutyrate	3-Hydroxybutyrate	0,6798	67	0,5254	0,7909	<,0001
Isobutyrate	3-Hydroxyphenylacetate	0,6076	67	0,4302	0,7398	<,0001
Isobutyrate	3-Phenylpropionate	0,5729	67	0,3857	0,7147	<,0001
Isobutyrate	4-Hydroxybutyrate	0,6795	67	0,5250	0,7906	<,0001
Isobutyrate	Acetate	0,6608	67	0,5000	0,7776	<,0001
Isobutyrate	Acetoacetate	0,8124	67	0,7109	0,8807	<,0001
Isobutyrate	Acetone	0,7178	67	0,5771	0,8171	<,0001
Isobutyrate	Adipate	0,7506	67	0,6227	0,8395	<,0001
Isobutyrate	Alanine	0,7901	67	0,6787	0,8660	<,0001
Isobutyrate	Allantoin	0,3922	67	0,1678	0,5780	0,0010
Isobutyrate	Aspartate	0,6715	67	0,5142	0,7851	<,0001
Isobutyrate	Benzoate	0,5333	67	0,3362	0,6857	<,0001
Isobutyrate	Butyrate	0,8588	67	0,7794	0,9111	<,0001
Isobutyrate	Cadaverine	0,5504	67	0,3574	0,6983	<,0001
Isobutyrate	Caffeine	0,5536	67	0,3615	0,7007	<,0001
Isobutyrate	Carnitine	0,7690	67	0,6486	0,8518	<,0001
Isobutyrate	Choline	0,6104	67	0,4338	0,7419	<,0001
Isobutyrate	Dimethylamine	0,3233	67	0,0900	0,5229	0,0076
Isobutyrate	Ethanol	0,6553	67	0,4926	0,7737	<,0001
Isobutyrate	Ferulate	0,6360	67	0,4672	0,7601	<,0001
Isobutyrate	Formate	0,5726	67	0,3853	0,7145	<,0001
Isobutyrate	Fumarate	0,5426	67	0,3478	0,6926	<,0001
Isobutyrate	Glucose	0,6680	67	0,5096	0,7827	<,0001
Isobutyrate	Glutamate	0,6530	67	0,4896	0,7721	<,0001
Isobutyrate	Glycerol	0,6111	67	0,4347	0,7423	<,0001
Isobutyrate	Glycine	0,6870	67	0,5351	0,7959	<,0001
Isobutyrate	Histidine	0,5349	67	0,3381	0,6868	<,0001
Isobutyrate	Hypoxanthine	0,5624	67	0,3725	0,7071	<,0001
Isobutyrate	Imidazole	0,5134	67	0,3116	0,6708	<,0001
Isoleucine	1,3-Dihydroxyacetone	0,6551	67	0,4923	0,7736	<,0001
Isoleucine	2-Phenylpropionate	0,8228	67	0,7261	0,8876	<,0001
Isoleucine	3-Hydroxybutyrate	0,8520	67	0,7692	0,9067	<,0001
Isoleucine	3-Hydroxyphenylacetate	0,8250	67	0,7293	0,8890	<,0001
Isoleucine	3-Phenylpropionate	0,7729	67	0,6542	0,8545	<,0001
Isoleucine	4-Hydroxybutyrate	0,9053	67	0,8499	0,9409	<,0001
Isoleucine	Acetate	0,3656	67	0,1375	0,5569	0,0023
Isoleucine	Acetoacetate	0,9330	67	0,8929	0,9584	<,0001
Isoleucine	Acetone	0,8970	67	0,8372	0,9356	<,0001
Isoleucine	Adipate	0,9023	67	0,8452	0,9390	<,0001
Isoleucine	Alanine	0,8328	67	0,7407	0,8941	<,0001
Isoleucine	Allantoin	0,1823	67	-0,0606	0,4048	0,1399
Isoleucine	Aspartate	0,8883	67	0,8239	0,9301	<,0001
Isoleucine	Benzoate	0,7545	67	0,6282	0,8421	<,0001
Isoleucine	Butyrate	0,8760	67	0,8052	0,9222	<,0001
Isoleucine	Cadaverine	0,7765	67	0,6592	0,8569	<,0001
Isoleucine	Caffeine	0,7774	67	0,6606	0,8575	<,0001
Isoleucine	Carnitine	0,9467	67	0,9145	0,9670	<,0001
Isoleucine	Choline	0,8651	67	0,7888	0,9151	<,0001
Isoleucine	Dimethylamine	0,0275	67	-0,2141	0,2659	0,8253
Isoleucine	Ethanol	0,9116	67	0,8596	0,9449	<,0001
Isoleucine	Ferulate	0,7902	67	0,6788	0,8660	<,0001
Isoleucine	Formate	0,7882	67	0,6760	0,8647	<,0001
Isoleucine	Fumarate	0,6464	67	0,4809	0,7675	<,0001
Isoleucine	Glucose	0,8462	67	0,7607	0,9029	<,0001
Isoleucine	Glutamate	0,8466	67	0,7612	0,9032	<,0001
Isoleucine	Glycerol	0,8743	67	0,8027	0,9211	<,0001
Isoleucine	Glycine	0,4687	67	0,2574	0,6371	<,0001
Isoleucine	Histidine	0,7578	67	0,6327	0,8443	<,0001
Isoleucine	Hypoxanthine	0,7757	67	0,6581	0,8564	<,0001
Isoleucine	Imidazole	0,7377	67	0,6047	0,8307	<,0001
Isoleucine	Isobutyrate	0,7184	67	0,5780	0,8176	<,0001
Isopropanol	1,3-Dihydroxyacetone	0,8400	67	0,7514	0,8989	<,0001
Isopropanol	2-Phenylpropionate	0,9702	67	0,9518	0,9816	<,0001
Isopropanol	3-Hydroxybutyrate	0,9359	67	0,8975	0,9603	<,0001
Isopropanol	3-Hydroxyphenylacetate	0,9371	67	0,8993	0,9610	<,0001
Isopropanol	3-Phenylpropionate	0,9629	67	0,9402	0,9771	<,0001
Isopropanol	4-Hydroxybutyrate	0,9061	67	0,8512	0,9414	<,0001
Isopropanol	Acetate	0,1631	67	-0,0803	0,3881	0,1874
Isopropanol	Acetoacetate	0,8316	67	0,7390	0,8933	<,0001
Isopropanol	Acetone	0,9402	67	0,9042	0,9629	<,0001
Isopropanol	Adipate	0,8831	67	0,8160	0,9267	<,0001
Isopropanol	Alanine	0,8223	67	0,7253	0,8872	<,0001
Isopropanol	Allantoin	0,3560	67	0,1267	0,5493	0,0031
Isopropanol	Aspartate	0,9399	67	0,9038	0,9628	<,0001
Isopropanol	Benzoate	0,9221	67	0,8760	0,9516	<,0001
Isopropanol	Butyrate	0,7865	67	0,6736	0,8636	<,0001
Isopropanol	Cadaverine	0,9381	67	0,9010	0,9616	<,0001
Isopropanol	Caffeine	0,9492	67	0,9184	0,9686	<,0001
Isopropanol	Carnitine	0,8052	67	0,7004	0,8760	<,0001
Isopropanol	Choline	0,9144	67	0,8639	0,9467	<,0001
Isopropanol	Dimethylamine	0,3926	67	0,1683	0,5783	0,0010
Isopropanol	Ethanol	0,9388	67	0,9021	0,9621	<,0001
Isopropanol	Ferulate	0,9431	67	0,9088	0,9648	<,0001
Isopropanol	Formate	0,9468	67	0,9147	0,9671	<,0001
Isopropanol	Fumarate	0,8797	67	0,8108	0,9245	<,0001
Isopropanol	Glucose	0,8543	67	0,7726	0,9081	<,0001
Isopropanol	Glutamate	0,9105	67	0,8579	0,9442	<,0001
Isopropanol	Glycerol	0,9291	67	0,8868	0,9559	<,0001
Isopropanol	Glycine	0,1739	67	-0,0692	0,3975	0,1592
Isopropanol	Histidine	0,9305	67	0,8890	0,9569	<,0001
Isopropanol	Hypoxanthine	0,9437	67	0,9097	0,9651	<,0001
Isopropanol	Imidazole	0,9191	67	0,8712	0,9496	<,0001
Isopropanol	Isobutyrate	0,6733	67	0,5167	0,7863	<,0001
Isopropanol	Isoleucine	0,8191	67	0,7206	0,8851	<,0001
Isovalerate	1,3-Dihydroxyacetone	0,5599	67	0,3694	0,7053	<,0001
Isovalerate	2-Phenylpropionate	0,6763	67	0,5207	0,7884	<,0001
Isovalerate	3-Hydroxybutyrate	0,7036	67	0,5577	0,8074	<,0001
Isovalerate	3-Hydroxyphenylacetate	0,5010	67	0,2965	0,6616	<,0001
Isovalerate	3-Phenylpropionate	0,5801	67	0,3949	0,7200	<,0001
Isovalerate	4-Hydroxybutyrate	0,5541	67	0,3621	0,7010	<,0001
Isovalerate	Acetate	0,3684	67	0,1406	0,5591	0,0022
Isovalerate	Acetoacetate	0,5803	67	0,3952	0,7201	<,0001
Isovalerate	Acetone	0,5909	67	0,4087	0,7278	<,0001
Isovalerate	Adipate	0,5544	67	0,3625	0,7012	<,0001
Isovalerate	Alanine	0,6381	67	0,4700	0,7616	<,0001
Isovalerate	Allantoin	0,5104	67	0,3079	0,6686	<,0001
Isovalerate	Aspartate	0,5987	67	0,4188	0,7335	<,0001
Isovalerate	Benzoate	0,4740	67	0,2639	0,6412	<,0001
Isovalerate	Butyrate	0,6444	67	0,4783	0,7661	<,0001
Isovalerate	Cadaverine	0,6570	67	0,4950	0,7749	<,0001
Isovalerate	Caffeine	0,4947	67	0,2888	0,6568	<,0001
Isovalerate	Carnitine	0,6292	67	0,4582	0,7553	<,0001
Isovalerate	Choline	0,5308	67	0,3330	0,6838	<,0001
Isovalerate	Dimethylamine	0,5853	67	0,4015	0,7237	<,0001
Isovalerate	Ethanol	0,5741	67	0,3872	0,7156	<,0001
Isovalerate	Ferulate	0,5960	67	0,4153	0,7315	<,0001
Isovalerate	Formate	0,4990	67	0,2940	0,6601	<,0001
Isovalerate	Fumarate	0,6240	67	0,4515	0,7516	<,0001
Isovalerate	Glucose	0,5284	67	0,3301	0,6820	<,0001
Isovalerate	Glutamate	0,5424	67	0,3475	0,6924	<,0001
Isovalerate	Glycerol	0,5179	67	0,3171	0,6742	<,0001
Isovalerate	Glycine	0,4127	67	0,1915	0,5941	0,0005
Isovalerate	Histidine	0,4772	67	0,2677	0,6437	<,0001
Isovalerate	Hypoxanthine	0,4950	67	0,2892	0,6571	<,0001
Isovalerate	Imidazole	0,4675	67	0,2560	0,6362	<,0001
Isovalerate	Isobutyrate	0,7110	67	0,5678	0,8125	<,0001
Isovalerate	Isoleucine	0,5749	67	0,3884	0,7162	<,0001
Isovalerate	Isopropanol	0,7093	67	0,5655	0,8113	<,0001
Lactate	1,3-Dihydroxyacetone	0,7993	67	0,6919	0,8721	<,0001
Lactate	2-Phenylpropionate	0,9329	67	0,8928	0,9584	<,0001
Lactate	3-Hydroxybutyrate	0,9501	67	0,9197	0,9691	<,0001
Lactate	3-Hydroxyphenylacetate	0,8698	67	0,7958	0,9181	<,0001
Lactate	3-Phenylpropionate	0,8828	67	0,8155	0,9265	<,0001
Lactate	4-Hydroxybutyrate	0,9207	67	0,8737	0,9506	<,0001
Lactate	Acetate	0,2904	67	0,0539	0,4960	0,0171
Lactate	Acetoacetate	0,8895	67	0,8257	0,9308	<,0001
Lactate	Acetone	0,9068	67	0,8523	0,9419	<,0001
Lactate	Adipate	0,8810	67	0,8127	0,9253	<,0001
Lactate	Alanine	0,8485	67	0,7640	0,9044	<,0001
Lactate	Allantoin	0,4126	67	0,1914	0,5940	0,0005
Lactate	Aspartate	0,9332	67	0,8933	0,9586	<,0001
Lactate	Benzoate	0,8304	67	0,7372	0,8926	<,0001
Lactate	Butyrate	0,8417	67	0,7539	0,8999	<,0001
Lactate	Cadaverine	0,8575	67	0,7774	0,9102	<,0001
Lactate	Caffeine	0,8606	67	0,7821	0,9122	<,0001
Lactate	Carnitine	0,8736	67	0,8017	0,9206	<,0001
Lactate	Choline	0,8668	67	0,7913	0,9162	<,0001
Lactate	Dimethylamine	0,3450	67	0,1142	0,5404	0,0042
Lactate	Ethanol	0,9010	67	0,8434	0,9382	<,0001
Lactate	Ferulate	0,8876	67	0,8229	0,9296	<,0001
Lactate	Formate	0,8603	67	0,7816	0,9120	<,0001
Lactate	Fumarate	0,8195	67	0,7212	0,8854	<,0001
Lactate	Glucose	0,8641	67	0,7873	0,9145	<,0001
Lactate	Glutamate	0,8728	67	0,8004	0,9201	<,0001
Lactate	Glycerol	0,8986	67	0,8396	0,9366	<,0001
Lactate	Glycine	0,3658	67	0,1377	0,5571	0,0023
Lactate	Histidine	0,8376	67	0,7479	0,8973	<,0001
Lactate	Hypoxanthine	0,8554	67	0,7743	0,9089	<,0001
Lactate	Imidazole	0,8192	67	0,7208	0,8852	<,0001
Lactate	Isobutyrate	0,7789	67	0,6627	0,8585	<,0001
Lactate	Isoleucine	0,8850	67	0,8188	0,9279	<,0001
Lactate	Isopropanol	0,9225	67	0,8766	0,9518	<,0001
Lactate	Isovalerate	0,7365	67	0,6030	0,8299	<,0001
Leucine	1,3-Dihydroxyacetone	0,5717	67	0,3843	0,7139	<,0001
Leucine	2-Phenylpropionate	0,7453	67	0,6152	0,8359	<,0001
Leucine	3-Hydroxybutyrate	0,7315	67	0,5960	0,8265	<,0001
Leucine	3-Hydroxyphenylacetate	0,7385	67	0,6057	0,8312	<,0001
Leucine	3-Phenylpropionate	0,6704	67	0,5127	0,7843	<,0001
Leucine	4-Hydroxybutyrate	0,8315	67	0,7388	0,8933	<,0001
Leucine	Acetate	0,4929	67	0,2867	0,6555	<,0001
Leucine	Acetoacetate	0,8991	67	0,8404	0,9369	<,0001
Leucine	Acetone	0,8126	67	0,7112	0,8809	<,0001
Leucine	Adipate	0,8545	67	0,7729	0,9083	<,0001
Leucine	Alanine	0,8448	67	0,7585	0,9020	<,0001
Leucine	Allantoin	0,1138	67	-0,1299	0,3446	0,3591
Leucine	Aspartate	0,8267	67	0,7318	0,8901	<,0001
Leucine	Benzoate	0,6582	67	0,4965	0,7758	<,0001
Leucine	Butyrate	0,8661	67	0,7903	0,9158	<,0001
Leucine	Cadaverine	0,7638	67	0,6412	0,8483	<,0001
Leucine	Caffeine	0,6717	67	0,5145	0,7852	<,0001
Leucine	Carnitine	0,8997	67	0,8414	0,9374	<,0001
Leucine	Choline	0,8067	67	0,7027	0,8770	<,0001
Leucine	Dimethylamine	0,0697	67	-0,1734	0,3048	0,5750
Leucine	Ethanol	0,8127	67	0,7113	0,8809	<,0001
Leucine	Ferulate	0,7223	67	0,5833	0,8202	<,0001
Leucine	Formate	0,6724	67	0,5155	0,7857	<,0001
Leucine	Fumarate	0,5765	67	0,3903	0,7174	<,0001
Leucine	Glucose	0,7732	67	0,6546	0,8547	<,0001
Leucine	Glutamate	0,8232	67	0,7267	0,8879	<,0001
Leucine	Glycerol	0,7788	67	0,6625	0,8584	<,0001
Leucine	Glycine	0,5834	67	0,3992	0,7224	<,0001
Leucine	Histidine	0,6521	67	0,4884	0,7714	<,0001
Leucine	Hypoxanthine	0,6718	67	0,5146	0,7853	<,0001
Leucine	Imidazole	0,6414	67	0,4743	0,7639	<,0001
Leucine	Isobutyrate	0,7350	67	0,6009	0,8289	<,0001
Leucine	Isoleucine	0,8986	67	0,8397	0,9367	<,0001
Leucine	Isopropanol	0,7465	67	0,6169	0,8367	<,0001
Leucine	Isovalerate	0,6452	67	0,4793	0,7666	<,0001
Leucine	Lactate	0,8248	67	0,7291	0,8889	<,0001
Lysine	1,3-Dihydroxyacetone	0,8125	67	0,7111	0,8808	<,0001
Lysine	2-Phenylpropionate	0,9136	67	0,8628	0,9462	<,0001
Lysine	3-Hydroxybutyrate	0,8445	67	0,7581	0,9018	<,0001
Lysine	3-Hydroxyphenylacetate	0,9606	67	0,9365	0,9757	<,0001
Lysine	3-Phenylpropionate	0,9034	67	0,8469	0,9397	<,0001
Lysine	4-Hydroxybutyrate	0,9575	67	0,9315	0,9737	<,0001
Lysine	Acetate	0,2361	67	-0,0044	0,4507	0,0544
Lysine	Acetoacetate	0,8890	67	0,8249	0,9305	<,0001
Lysine	Acetone	0,9422	67	0,9074	0,9642	<,0001
Lysine	Adipate	0,9383	67	0,9012	0,9617	<,0001
Lysine	Alanine	0,8161	67	0,7163	0,8832	<,0001
Lysine	Allantoin	0,0675	67	-0,1755	0,3028	0,5872
Lysine	Aspartate	0,9659	67	0,9450	0,9790	<,0001
Lysine	Benzoate	0,8897	67	0,8260	0,9309	<,0001
Lysine	Butyrate	0,8066	67	0,7026	0,8769	<,0001
Lysine	Cadaverine	0,9372	67	0,8994	0,9610	<,0001
Lysine	Caffeine	0,9432	67	0,9089	0,9648	<,0001
Lysine	Carnitine	0,8311	67	0,7383	0,8931	<,0001
Lysine	Choline	0,9529	67	0,9242	0,9709	<,0001
Lysine	Dimethylamine	0,1416	67	-0,1021	0,3692	0,2531
Lysine	Ethanol	0,9463	67	0,9138	0,9667	<,0001
Lysine	Ferulate	0,9180	67	0,8695	0,9489	<,0001
Lysine	Formate	0,9070	67	0,8525	0,9420	<,0001
Lysine	Fumarate	0,7236	67	0,5851	0,8211	<,0001
Lysine	Glucose	0,8355	67	0,7447	0,8959	<,0001
Lysine	Glutamate	0,9695	67	0,9507	0,9812	<,0001
Lysine	Glycerol	0,9699	67	0,9513	0,9814	<,0001
Lysine	Glycine	0,2287	67	-0,0122	0,4445	0,0627
Lysine	Histidine	0,8989	67	0,8401	0,9368	<,0001
Lysine	Hypoxanthine	0,9109	67	0,8585	0,9444	<,0001
Lysine	Imidazole	0,8850	67	0,8188	0,9279	<,0001
Lysine	Isobutyrate	0,6084	67	0,4312	0,7404	<,0001
Lysine	Isoleucine	0,8495	67	0,7654	0,9050	<,0001
Lysine	Isopropanol	0,9120	67	0,8602	0,9452	<,0001
Lysine	Isovalerate	0,5214	67	0,3214	0,6768	<,0001
Lysine	Lactate	0,8562	67	0,7755	0,9094	<,0001
Lysine	Leucine	0,8270	67	0,7322	0,8903	<,0001
Maltose	1,3-Dihydroxyacetone	0,3998	67	0,1765	0,5839	0,0008
Maltose	2-Phenylpropionate	0,7500	67	0,6218	0,8390	<,0001
Maltose	3-Hydroxybutyrate	0,7217	67	0,5825	0,8198	<,0001
Maltose	3-Hydroxyphenylacetate	0,7208	67	0,5812	0,8192	<,0001
Maltose	3-Phenylpropionate	0,7836	67	0,6694	0,8616	<,0001
Maltose	4-Hydroxybutyrate	0,7748	67	0,6568	0,8557	<,0001
Maltose	Acetate	0,3018	67	0,0664	0,5054	0,0131
Maltose	Acetoacetate	0,8501	67	0,7663	0,9054	<,0001
Maltose	Acetone	0,7756	67	0,6579	0,8562	<,0001
Maltose	Adipate	0,8280	67	0,7338	0,8910	<,0001
Maltose	Alanine	0,7348	67	0,6006	0,8287	<,0001
Maltose	Allantoin	0,3259	67	0,0929	0,5250	0,0071
Maltose	Aspartate	0,7734	67	0,6549	0,8548	<,0001
Maltose	Benzoate	0,8291	67	0,7354	0,8917	<,0001
Maltose	Butyrate	0,7853	67	0,6718	0,8627	<,0001
Maltose	Cadaverine	0,6961	67	0,5474	0,8022	<,0001
Maltose	Caffeine	0,6842	67	0,5313	0,7939	<,0001
Maltose	Carnitine	0,7993	67	0,6919	0,8720	<,0001
Maltose	Choline	0,7473	67	0,6180	0,8372	<,0001
Maltose	Dimethylamine	0,0213	67	-0,2200	0,2602	0,8640
Maltose	Ethanol	0,7643	67	0,6419	0,8487	<,0001
Maltose	Ferulate	0,6573	67	0,4953	0,7751	<,0001
Maltose	Formate	0,8038	67	0,6985	0,8751	<,0001
Maltose	Fumarate	0,7315	67	0,5961	0,8265	<,0001
Maltose	Glucose	0,9399	67	0,9038	0,9628	<,0001
Maltose	Glutamate	0,7432	67	0,6122	0,8344	<,0001
Maltose	Glycerol	0,7379	67	0,6049	0,8309	<,0001
Maltose	Glycine	0,4304	67	0,2122	0,6078	0,0003
Maltose	Histidine	0,8169	67	0,7175	0,8837	<,0001
Maltose	Hypoxanthine	0,8148	67	0,7145	0,8823	<,0001
Maltose	Imidazole	0,8155	67	0,7155	0,8828	<,0001
Maltose	Isobutyrate	0,6307	67	0,4602	0,7563	<,0001
Maltose	Isoleucine	0,8209	67	0,7233	0,8863	<,0001
Maltose	Isopropanol	0,7363	67	0,6027	0,8298	<,0001
Maltose	Isovalerate	0,4675	67	0,2561	0,6363	<,0001
Maltose	Lactate	0,7923	67	0,6819	0,8674	<,0001
Maltose	Leucine	0,7780	67	0,6614	0,8579	<,0001
Maltose	Lysine	0,7487	67	0,6201	0,8382	<,0001
Methanol	1,3-Dihydroxyacetone	0,8892	67	0,8253	0,9307	<,0001
Methanol	2-Phenylpropionate	0,9430	67	0,9086	0,9647	<,0001
Methanol	3-Hydroxybutyrate	0,8758	67	0,8050	0,9221	<,0001
Methanol	3-Hydroxyphenylacetate	0,9669	67	0,9465	0,9796	<,0001
Methanol	3-Phenylpropionate	0,9440	67	0,9102	0,9653	<,0001
Methanol	4-Hydroxybutyrate	0,9212	67	0,8745	0,9510	<,0001
Methanol	Acetate	0,0432	67	-0,1991	0,2805	0,7286
Methanol	Acetoacetate	0,7924	67	0,6820	0,8675	<,0001
Methanol	Acetone	0,9208	67	0,8739	0,9507	<,0001
Methanol	Adipate	0,8630	67	0,7857	0,9138	<,0001
Methanol	Alanine	0,7832	67	0,6688	0,8614	<,0001
Methanol	Allantoin	0,2153	67	-0,0263	0,4331	0,0802
Methanol	Aspartate	0,9407	67	0,9050	0,9633	<,0001
Methanol	Benzoate	0,9168	67	0,8676	0,9482	<,0001
Methanol	Butyrate	0,7083	67	0,5641	0,8106	<,0001
Methanol	Cadaverine	0,9009	67	0,8432	0,9381	<,0001
Methanol	Caffeine	0,9903	67	0,9842	0,9940	<,0001
Methanol	Carnitine	0,7409	67	0,6091	0,8329	<,0001
Methanol	Choline	0,9215	67	0,8749	0,9511	<,0001
Methanol	Dimethylamine	0,2590	67	0,0201	0,4700	0,0343
Methanol	Ethanol	0,9266	67	0,8830	0,9544	<,0001
Methanol	Ferulate	0,9475	67	0,9157	0,9675	<,0001
Methanol	Formate	0,9528	67	0,9241	0,9708	<,0001
Methanol	Fumarate	0,8055	67	0,7010	0,8762	<,0001
Methanol	Glucose	0,8176	67	0,7185	0,8842	<,0001
Methanol	Glutamate	0,9154	67	0,8655	0,9473	<,0001
Methanol	Glycerol	0,9588	67	0,9336	0,9745	<,0001
Methanol	Glycine	0,0492	67	-0,1933	0,2860	0,6924
Methanol	Histidine	0,9337	67	0,8940	0,9588	<,0001
Methanol	Hypoxanthine	0,9482	67	0,9168	0,9680	<,0001
Methanol	Imidazole	0,9158	67	0,8661	0,9476	<,0001
Methanol	Isobutyrate	0,5594	67	0,3687	0,7049	<,0001
Methanol	Isoleucine	0,7552	67	0,6292	0,8426	<,0001
Methanol	Isopropanol	0,9340	67	0,8945	0,9591	<,0001
Methanol	Isovalerate	0,4828	67	0,2744	0,6478	<,0001
Methanol	Lactate	0,8563	67	0,7756	0,9094	<,0001
Methanol	Leucine	0,6512	67	0,4872	0,7709	<,0001
Methanol	Lysine	0,9268	67	0,8833	0,9545	<,0001
Methanol	Maltose	0,6694	67	0,5115	0,7836	<,0001
Methylamine	1,3-Dihydroxyacetone	0,7660	67	0,6444	0,8499	<,0001
Methylamine	2-Phenylpropionate	0,8891	67	0,8251	0,9306	<,0001
Methylamine	3-Hydroxybutyrate	0,8847	67	0,8183	0,9277	<,0001
Methylamine	3-Hydroxyphenylacetate	0,8006	67	0,6939	0,8730	<,0001
Methylamine	3-Phenylpropionate	0,8307	67	0,7376	0,8927	<,0001
Methylamine	4-Hydroxybutyrate	0,8331	67	0,7413	0,8943	<,0001
Methylamine	Acetate	0,2957	67	0,0598	0,5004	0,0151
Methylamine	Acetoacetate	0,8034	67	0,6978	0,8748	<,0001
Methylamine	Acetone	0,8290	67	0,7352	0,8917	<,0001
Methylamine	Adipate	0,8133	67	0,7122	0,8813	<,0001
Methylamine	Alanine	0,7742	67	0,6560	0,8554	<,0001
Methylamine	Allantoin	0,4083	67	0,1864	0,5906	0,0006
Methylamine	Aspartate	0,8538	67	0,7719	0,9078	<,0001
Methylamine	Benzoate	0,7641	67	0,6416	0,8486	<,0001
Methylamine	Butyrate	0,7708	67	0,6512	0,8531	<,0001
Methylamine	Cadaverine	0,8167	67	0,7172	0,8836	<,0001
Methylamine	Caffeine	0,8023	67	0,6963	0,8741	<,0001
Methylamine	Carnitine	0,7796	67	0,6636	0,8589	<,0001
Methylamine	Choline	0,7965	67	0,6880	0,8702	<,0001
Methylamine	Dimethylamine	0,4437	67	0,2278	0,6180	0,0002
Methylamine	Ethanol	0,8203	67	0,7224	0,8859	<,0001
Methylamine	Ferulate	0,8286	67	0,7346	0,8914	<,0001
Methylamine	Formate	0,7916	67	0,6809	0,8670	<,0001
Methylamine	Fumarate	0,7516	67	0,6240	0,8401	<,0001
Methylamine	Glucose	0,7628	67	0,6398	0,8477	<,0001
Methylamine	Glutamate	0,8114	67	0,7095	0,8801	<,0001
Methylamine	Glycerol	0,8176	67	0,7186	0,8842	<,0001
Methylamine	Glycine	0,3274	67	0,0946	0,5262	0,0068
Methylamine	Histidine	0,7766	67	0,6594	0,8570	<,0001
Methylamine	Hypoxanthine	0,7889	67	0,6770	0,8652	<,0001
Methylamine	Imidazole	0,7605	67	0,6365	0,8461	<,0001
Methylamine	Isobutyrate	0,7685	67	0,6480	0,8515	<,0001
Methylamine	Isoleucine	0,7645	67	0,6423	0,8488	<,0001
Methylamine	Isopropanol	0,8784	67	0,8088	0,9237	<,0001
Methylamine	Isovalerate	0,7564	67	0,6308	0,8434	<,0001
Methylamine	Lactate	0,8834	67	0,8165	0,9269	<,0001
Methylamine	Leucine	0,7360	67	0,6023	0,8295	<,0001
Methylamine	Lysine	0,8011	67	0,6945	0,8733	<,0001
Methylamine	Maltose	0,6842	67	0,5313	0,7939	<,0001
Methylamine	Methanol	0,8059	67	0,7014	0,8764	<,0001
Nicotinate	1,3-Dihydroxyacetone	0,7323	67	0,5972	0,8271	<,0001
Nicotinate	2-Phenylpropionate	0,9007	67	0,8428	0,9380	<,0001
Nicotinate	3-Hydroxybutyrate	0,8375	67	0,7477	0,8972	<,0001
Nicotinate	3-Hydroxyphenylacetate	0,9456	67	0,9127	0,9663	<,0001
Nicotinate	3-Phenylpropionate	0,9740	67	0,9580	0,9840	<,0001
Nicotinate	4-Hydroxybutyrate	0,8732	67	0,8010	0,9204	<,0001
Nicotinate	Acetate	0,0691	67	-0,1740	0,3042	0,5786
Nicotinate	Acetoacetate	0,7943	67	0,6847	0,8688	<,0001
Nicotinate	Acetone	0,9017	67	0,8444	0,9386	<,0001
Nicotinate	Adipate	0,8846	67	0,8183	0,9277	<,0001
Nicotinate	Alanine	0,7419	67	0,6105	0,8336	<,0001
Nicotinate	Allantoin	0,2707	67	0,0326	0,4797	0,0267
Nicotinate	Aspartate	0,8917	67	0,8291	0,9322	<,0001
Nicotinate	Benzoate	0,9935	67	0,9894	0,9960	<,0001
Nicotinate	Butyrate	0,7125	67	0,5698	0,8135	<,0001
Nicotinate	Cadaverine	0,8864	67	0,8209	0,9288	<,0001
Nicotinate	Caffeine	0,9484	67	0,9171	0,9680	<,0001
Nicotinate	Carnitine	0,7230	67	0,5842	0,8207	<,0001
Nicotinate	Choline	0,8961	67	0,8359	0,9351	<,0001
Nicotinate	Dimethylamine	0,1653	67	-0,0780	0,3900	0,1812
Nicotinate	Ethanol	0,8928	67	0,8308	0,9329	<,0001
Nicotinate	Ferulate	0,8791	67	0,8099	0,9241	<,0001
Nicotinate	Formate	0,9738	67	0,9576	0,9839	<,0001
Nicotinate	Fumarate	0,8508	67	0,7675	0,9059	<,0001
Nicotinate	Glucose	0,8547	67	0,7733	0,9084	<,0001
Nicotinate	Glutamate	0,9043	67	0,8484	0,9403	<,0001
Nicotinate	Glycerol	0,9180	67	0,8695	0,9489	<,0001
Nicotinate	Glycine	0,0593	67	-0,1835	0,2953	0,6337
Nicotinate	Histidine	0,9953	67	0,9924	0,9971	<,0001
Nicotinate	Hypoxanthine	0,9854	67	0,9763	0,9910	<,0001
Nicotinate	Imidazole	0,9944	67	0,9910	0,9966	<,0001
Nicotinate	Isobutyrate	0,5146	67	0,3131	0,6718	<,0001
Nicotinate	Isoleucine	0,7502	67	0,6221	0,8392	<,0001
Nicotinate	Isopropanol	0,9183	67	0,8700	0,9491	<,0001
Nicotinate	Isovalerate	0,4410	67	0,2246	0,6160	0,0002
Nicotinate	Lactate	0,8184	67	0,7197	0,8847	<,0001
Nicotinate	Leucine	0,6438	67	0,4775	0,7656	<,0001
Nicotinate	Lysine	0,9060	67	0,8510	0,9413	<,0001
Nicotinate	Maltose	0,7933	67	0,6833	0,8681	<,0001
Nicotinate	Methanol	0,9339	67	0,8943	0,9590	<,0001
Nicotinate	Methylamine	0,7572	67	0,6320	0,8439	<,0001
N-nitrosodimethylamine	1,3-Dihydroxyacetone	0,8481	67	0,7634	0,9041	<,0001
N-nitrosodimethylamine	2-Phenylpropionate	0,9089	67	0,8554	0,9432	<,0001
N-nitrosodimethylamine	3-Hydroxybutyrate	0,8631	67	0,7858	0,9138	<,0001
N-nitrosodimethylamine	3-Hydroxyphenylacetate	0,9463	67	0,9138	0,9667	<,0001
N-nitrosodimethylamine	3-Phenylpropionate	0,8737	67	0,8017	0,9207	<,0001
N-nitrosodimethylamine	4-Hydroxybutyrate	0,9621	67	0,9389	0,9766	<,0001
N-nitrosodimethylamine	Acetate	0,1826	67	-0,0603	0,4050	0,1392
N-nitrosodimethylamine	Acetoacetate	0,8806	67	0,8122	0,9251	<,0001
N-nitrosodimethylamine	Acetone	0,9224	67	0,8764	0,9517	<,0001
N-nitrosodimethylamine	Adipate	0,8969	67	0,8371	0,9356	<,0001
N-nitrosodimethylamine	Alanine	0,8224	67	0,7255	0,8873	<,0001
N-nitrosodimethylamine	Allantoin	0,1391	67	-0,1046	0,3670	0,2617
N-nitrosodimethylamine	Aspartate	0,9730	67	0,9563	0,9834	<,0001
N-nitrosodimethylamine	Benzoate	0,8353	67	0,7445	0,8958	<,0001
N-nitrosodimethylamine	Butyrate	0,7937	67	0,6839	0,8684	<,0001
N-nitrosodimethylamine	Cadaverine	0,8939	67	0,8324	0,9336	<,0001
N-nitrosodimethylamine	Caffeine	0,9237	67	0,8783	0,9525	<,0001
N-nitrosodimethylamine	Carnitine	0,8568	67	0,7764	0,9098	<,0001
N-nitrosodimethylamine	Choline	0,9310	67	0,8898	0,9572	<,0001
N-nitrosodimethylamine	Dimethylamine	0,1631	67	-0,0802	0,3881	0,1872
N-nitrosodimethylamine	Ethanol	0,9253	67	0,8809	0,9536	<,0001
N-nitrosodimethylamine	Ferulate	0,9419	67	0,9068	0,9640	<,0001
N-nitrosodimethylamine	Formate	0,8689	67	0,7945	0,9176	<,0001
N-nitrosodimethylamine	Fumarate	0,7106	67	0,5672	0,8122	<,0001
N-nitrosodimethylamine	Glucose	0,8226	67	0,7258	0,8875	<,0001
N-nitrosodimethylamine	Glutamate	0,9432	67	0,9089	0,9648	<,0001
N-nitrosodimethylamine	Glycerol	0,9621	67	0,9389	0,9766	<,0001
N-nitrosodimethylamine	Glycine	0,2624	67	0,0237	0,4728	0,0319
N-nitrosodimethylamine	Histidine	0,8491	67	0,7649	0,9048	<,0001
N-nitrosodimethylamine	Hypoxanthine	0,8667	67	0,7912	0,9162	<,0001
N-nitrosodimethylamine	Imidazole	0,8279	67	0,7335	0,8909	<,0001
N-nitrosodimethylamine	Isobutyrate	0,6315	67	0,4613	0,7569	<,0001
N-nitrosodimethylamine	Isoleucine	0,8635	67	0,7865	0,9141	<,0001
N-nitrosodimethylamine	Isopropanol	0,8958	67	0,8354	0,9349	<,0001
N-nitrosodimethylamine	Isovalerate	0,5392	67	0,3434	0,6900	<,0001
N-nitrosodimethylamine	Lactate	0,8968	67	0,8368	0,9355	<,0001
N-nitrosodimethylamine	Leucine	0,8315	67	0,7388	0,8933	<,0001
N-nitrosodimethylamine	Lysine	0,9448	67	0,9114	0,9658	<,0001
N-nitrosodimethylamine	Maltose	0,7230	67	0,5842	0,8206	<,0001
N-nitrosodimethylamine	Methanol	0,9122	67	0,8605	0,9453	<,0001
N-nitrosodimethylamine	Methylamine	0,7902	67	0,6788	0,8660	<,0001
N-nitrosodimethylamine	Nicotinate	0,8502	67	0,7666	0,9055	<,0001
N-Phenylacetylglycine	1,3-Dihydroxyacetone	0,8962	67	0,8359	0,9351	<,0001
N-Phenylacetylglycine	2-Phenylpropionate	0,9525	67	0,9236	0,9706	<,0001
N-Phenylacetylglycine	3-Hydroxybutyrate	0,8944	67	0,8332	0,9339	<,0001
N-Phenylacetylglycine	3-Hydroxyphenylacetate	0,9800	67	0,9675	0,9877	<,0001
N-Phenylacetylglycine	3-Phenylpropionate	0,9248	67	0,8800	0,9532	<,0001
N-Phenylacetylglycine	4-Hydroxybutyrate	0,9786	67	0,9652	0,9868	<,0001
N-Phenylacetylglycine	Acetate	0,1668	67	-0,0765	0,3913	0,1774
N-Phenylacetylglycine	Acetoacetate	0,8843	67	0,8178	0,9275	<,0001
N-Phenylacetylglycine	Acetone	0,9512	67	0,9216	0,9698	<,0001
N-Phenylacetylglycine	Adipate	0,9231	67	0,8774	0,9521	<,0001
N-Phenylacetylglycine	Alanine	0,8356	67	0,7448	0,8959	<,0001
N-Phenylacetylglycine	Allantoin	0,1846	67	-0,0582	0,4068	0,1347
N-Phenylacetylglycine	Aspartate	0,9748	67	0,9592	0,9845	<,0001
N-Phenylacetylglycine	Benzoate	0,8882	67	0,8237	0,9300	<,0001
N-Phenylacetylglycine	Butyrate	0,8069	67	0,7030	0,8771	<,0001
N-Phenylacetylglycine	Cadaverine	0,9282	67	0,8854	0,9554	<,0001
N-Phenylacetylglycine	Caffeine	0,9721	67	0,9549	0,9828	<,0001
N-Phenylacetylglycine	Carnitine	0,8637	67	0,7867	0,9142	<,0001
N-Phenylacetylglycine	Choline	0,9656	67	0,9445	0,9788	<,0001
N-Phenylacetylglycine	Dimethylamine	0,1982	67	-0,0441	0,4185	0,1078
N-Phenylacetylglycine	Ethanol	0,9510	67	0,9212	0,9697	<,0001
N-Phenylacetylglycine	Ferulate	0,9669	67	0,9466	0,9796	<,0001
N-Phenylacetylglycine	Formate	0,9154	67	0,8656	0,9473	<,0001
N-Phenylacetylglycine	Fumarate	0,7532	67	0,6264	0,8412	<,0001
N-Phenylacetylglycine	Glucose	0,8209	67	0,7233	0,8863	<,0001
N-Phenylacetylglycine	Glutamate	0,9548	67	0,9272	0,9721	<,0001
N-Phenylacetylglycine	Glycerol	0,9878	67	0,9801	0,9925	<,0001
N-Phenylacetylglycine	Glycine	0,2225	67	-0,0187	0,4393	0,0703
N-Phenylacetylglycine	Histidine	0,9017	67	0,8444	0,9386	<,0001
N-Phenylacetylglycine	Hypoxanthine	0,9144	67	0,8639	0,9467	<,0001
N-Phenylacetylglycine	Imidazole	0,8830	67	0,8159	0,9267	<,0001
N-Phenylacetylglycine	Isobutyrate	0,6385	67	0,4704	0,7618	<,0001
N-Phenylacetylglycine	Isoleucine	0,8535	67	0,7715	0,9077	<,0001
N-Phenylacetylglycine	Isopropanol	0,9364	67	0,8982	0,9605	<,0001
N-Phenylacetylglycine	Isovalerate	0,5497	67	0,3566	0,6978	<,0001
N-Phenylacetylglycine	Lactate	0,8974	67	0,8377	0,9359	<,0001
N-Phenylacetylglycine	Leucine	0,7788	67	0,6625	0,8584	<,0001
N-Phenylacetylglycine	Lysine	0,9627	67	0,9398	0,9770	<,0001
N-Phenylacetylglycine	Maltose	0,7122	67	0,5695	0,8133	<,0001
N-Phenylacetylglycine	Methanol	0,9617	67	0,9382	0,9764	<,0001
N-Phenylacetylglycine	Methylamine	0,8363	67	0,7459	0,8964	<,0001
N-Phenylacetylglycine	Nicotinate	0,9080	67	0,8540	0,9426	<,0001
N-Phenylacetylglycine	N-nitrosodimethylamine	0,9561	67	0,9293	0,9729	<,0001
Ornithine	1,3-Dihydroxyacetone	0,7545	67	0,6281	0,8421	<,0001
Ornithine	2-Phenylpropionate	0,8764	67	0,8058	0,9224	<,0001
Ornithine	3-Hydroxybutyrate	0,8388	67	0,7497	0,8981	<,0001
Ornithine	3-Hydroxyphenylacetate	0,9157	67	0,8660	0,9475	<,0001
Ornithine	3-Phenylpropionate	0,8699	67	0,7961	0,9183	<,0001
Ornithine	4-Hydroxybutyrate	0,8826	67	0,8153	0,9264	<,0001
Ornithine	Acetate	0,2502	67	0,0107	0,4626	0,0411
Ornithine	Acetoacetate	0,8584	67	0,7787	0,9108	<,0001
Ornithine	Acetone	0,9408	67	0,9051	0,9633	<,0001
Ornithine	Adipate	0,9156	67	0,8658	0,9474	<,0001
Ornithine	Alanine	0,8264	67	0,7314	0,8899	<,0001
Ornithine	Allantoin	0,1858	67	-0,0569	0,4078	0,1322
Ornithine	Aspartate	0,8983	67	0,8392	0,9364	<,0001
Ornithine	Benzoate	0,8685	67	0,7939	0,9173	<,0001
Ornithine	Butyrate	0,8214	67	0,7241	0,8867	<,0001
Ornithine	Cadaverine	0,8850	67	0,8188	0,9279	<,0001
Ornithine	Caffeine	0,8866	67	0,8212	0,9289	<,0001
Ornithine	Carnitine	0,8095	67	0,7067	0,8788	<,0001
Ornithine	Choline	0,9077	67	0,8537	0,9424	<,0001
Ornithine	Dimethylamine	0,1683	67	-0,0750	0,3926	0,1734
Ornithine	Ethanol	0,9101	67	0,8573	0,9439	<,0001
Ornithine	Ferulate	0,8814	67	0,8133	0,9256	<,0001
Ornithine	Formate	0,8781	67	0,8084	0,9235	<,0001
Ornithine	Fumarate	0,7822	67	0,6674	0,8607	<,0001
Ornithine	Glucose	0,7964	67	0,6878	0,8701	<,0001
Ornithine	Glutamate	0,9414	67	0,9061	0,9637	<,0001
Ornithine	Glycerol	0,9022	67	0,8451	0,9389	<,0001
Ornithine	Glycine	0,2709	67	0,0328	0,4799	0,0266
Ornithine	Histidine	0,8646	67	0,7880	0,9148	<,0001
Ornithine	Hypoxanthine	0,8750	67	0,8038	0,9215	<,0001
Ornithine	Imidazole	0,8599	67	0,7811	0,9118	<,0001
Ornithine	Isobutyrate	0,6395	67	0,4717	0,7626	<,0001
Ornithine	Isoleucine	0,8405	67	0,7521	0,8992	<,0001
Ornithine	Isopropanol	0,9182	67	0,8698	0,9491	<,0001
Ornithine	Isovalerate	0,5874	67	0,4042	0,7253	<,0001
Ornithine	Lactate	0,8506	67	0,7671	0,9057	<,0001
Ornithine	Leucine	0,8124	67	0,7110	0,8808	<,0001
Ornithine	Lysine	0,9151	67	0,8651	0,9471	<,0001
Ornithine	Maltose	0,7103	67	0,5667	0,8119	<,0001
Ornithine	Methanol	0,8640	67	0,7872	0,9144	<,0001
Ornithine	Methylamine	0,7816	67	0,6665	0,8603	<,0001
Ornithine	Nicotinate	0,8691	67	0,7948	0,9177	<,0001
Ornithine	N-nitrosodimethylamine	0,8831	67	0,8160	0,9267	<,0001
Ornithine	N-Phenylacetylglycine	0,8957	67	0,8352	0,9348	<,0001
Phenylacetate	1,3-Dihydroxyacetone	0,8385	67	0,7491	0,8978	<,0001
Phenylacetate	2-Phenylpropionate	0,9506	67	0,9206	0,9694	<,0001
Phenylacetate	3-Hydroxybutyrate	0,8897	67	0,8261	0,9310	<,0001
Phenylacetate	3-Hydroxyphenylacetate	0,8952	67	0,8345	0,9345	<,0001
Phenylacetate	3-Phenylpropionate	0,8979	67	0,8385	0,9362	<,0001
Phenylacetate	4-Hydroxybutyrate	0,8896	67	0,8259	0,9309	<,0001
Phenylacetate	Acetate	0,1784	67	-0,0645	0,4014	0,1485
Phenylacetate	Acetoacetate	0,8249	67	0,7291	0,8889	<,0001
Phenylacetate	Acetone	0,8870	67	0,8220	0,9292	<,0001
Phenylacetate	Adipate	0,8447	67	0,7584	0,9019	<,0001
Phenylacetate	Alanine	0,8357	67	0,7450	0,8960	<,0001
Phenylacetate	Allantoin	0,4419	67	0,2257	0,6167	0,0002
Phenylacetate	Aspartate	0,9048	67	0,8491	0,9406	<,0001
Phenylacetate	Benzoate	0,8610	67	0,7826	0,9125	<,0001
Phenylacetate	Butyrate	0,7756	67	0,6580	0,8563	<,0001
Phenylacetate	Cadaverine	0,9162	67	0,8667	0,9478	<,0001
Phenylacetate	Caffeine	0,9016	67	0,8442	0,9386	<,0001
Phenylacetate	Carnitine	0,8156	67	0,7156	0,8829	<,0001
Phenylacetate	Choline	0,8801	67	0,8115	0,9248	<,0001
Phenylacetate	Dimethylamine	0,3914	67	0,1669	0,5773	0,0011
Phenylacetate	Ethanol	0,8680	67	0,7932	0,9170	<,0001
Phenylacetate	Ferulate	0,9307	67	0,8894	0,9570	<,0001
Phenylacetate	Formate	0,8824	67	0,8150	0,9263	<,0001
Phenylacetate	Fumarate	0,8908	67	0,8276	0,9316	<,0001
Phenylacetate	Glucose	0,8209	67	0,7233	0,8863	<,0001
Phenylacetate	Glutamate	0,8520	67	0,7693	0,9067	<,0001
Phenylacetate	Glycerol	0,8921	67	0,8297	0,9325	<,0001
Phenylacetate	Glycine	0,2694	67	0,0312	0,4786	0,0275
Phenylacetate	Histidine	0,8600	67	0,7812	0,9119	<,0001
Phenylacetate	Hypoxanthine	0,8817	67	0,8138	0,9258	<,0001
Phenylacetate	Imidazole	0,8521	67	0,7694	0,9067	<,0001
Phenylacetate	Isobutyrate	0,6727	67	0,5159	0,7859	<,0001
Phenylacetate	Isoleucine	0,7854	67	0,6720	0,8628	<,0001
Phenylacetate	Isopropanol	0,9500	67	0,9196	0,9691	<,0001
Phenylacetate	Isovalerate	0,7176	67	0,5769	0,8170	<,0001
Phenylacetate	Lactate	0,9227	67	0,8768	0,9519	<,0001
Phenylacetate	Leucine	0,7458	67	0,6159	0,8362	<,0001
Phenylacetate	Lysine	0,8640	67	0,7872	0,9144	<,0001
Phenylacetate	Maltose	0,7104	67	0,5670	0,8121	<,0001
Phenylacetate	Methanol	0,8942	67	0,8328	0,9338	<,0001
Phenylacetate	Methylamine	0,8460	67	0,7603	0,9027	<,0001
Phenylacetate	Nicotinate	0,8481	67	0,7634	0,9041	<,0001
Phenylacetate	N-nitrosodimethylamine	0,8858	67	0,8201	0,9285	<,0001
Phenylacetate	N-Phenylacetylglycine	0,9087	67	0,8551	0,9430	<,0001
Phenylacetate	Ornithine	0,8661	67	0,7903	0,9158	<,0001
Phenylalanine	1,3-Dihydroxyacetone	0,7094	67	0,5655	0,8113	<,0001
Phenylalanine	2-Phenylpropionate	0,9265	67	0,8828	0,9543	<,0001
Phenylalanine	3-Hydroxybutyrate	0,8651	67	0,7888	0,9151	<,0001
Phenylalanine	3-Hydroxyphenylacetate	0,9202	67	0,8729	0,9503	<,0001
Phenylalanine	3-Phenylpropionate	0,9729	67	0,9561	0,9833	<,0001
Phenylalanine	4-Hydroxybutyrate	0,8820	67	0,8144	0,9260	<,0001
Phenylalanine	Acetate	0,1340	67	-0,1097	0,3625	0,2796
Phenylalanine	Acetoacetate	0,8373	67	0,7475	0,8971	<,0001
Phenylalanine	Acetone	0,9049	67	0,8493	0,9406	<,0001
Phenylalanine	Adipate	0,8955	67	0,8350	0,9347	<,0001
Phenylalanine	Alanine	0,7963	67	0,6876	0,8701	<,0001
Phenylalanine	Allantoin	0,3828	67	0,1570	0,5705	0,0014
Phenylalanine	Aspartate	0,9006	67	0,8427	0,9379	<,0001
Phenylalanine	Benzoate	0,9847	67	0,9752	0,9906	<,0001
Phenylalanine	Butyrate	0,7713	67	0,6519	0,8534	<,0001
Phenylalanine	Cadaverine	0,9089	67	0,8554	0,9432	<,0001
Phenylalanine	Caffeine	0,9175	67	0,8687	0,9486	<,0001
Phenylalanine	Carnitine	0,7900	67	0,6785	0,8659	<,0001
Phenylalanine	Choline	0,8948	67	0,8338	0,9342	<,0001
Phenylalanine	Dimethylamine	0,2256	67	-0,0155	0,4419	0,0664
Phenylalanine	Ethanol	0,8915	67	0,8288	0,9321	<,0001
Phenylalanine	Ferulate	0,8803	67	0,8117	0,9249	<,0001
Phenylalanine	Formate	0,9619	67	0,9386	0,9765	<,0001
Phenylalanine	Fumarate	0,9052	67	0,8498	0,9409	<,0001
Phenylalanine	Glucose	0,9030	67	0,8463	0,9394	<,0001
Phenylalanine	Glutamate	0,8924	67	0,8301	0,9327	<,0001
Phenylalanine	Glycerol	0,9033	67	0,8468	0,9396	<,0001
Phenylalanine	Glycine	0,1873	67	-0,0554	0,4091	0,1290
Phenylalanine	Histidine	0,9797	67	0,9671	0,9875	<,0001
Phenylalanine	Hypoxanthine	0,9745	67	0,9587	0,9843	<,0001
Phenylalanine	Imidazole	0,9814	67	0,9699	0,9886	<,0001
Phenylalanine	Isobutyrate	0,5930	67	0,4113	0,7293	<,0001
Phenylalanine	Isoleucine	0,7954	67	0,6863	0,8695	<,0001
Phenylalanine	Isopropanol	0,9393	67	0,9027	0,9623	<,0001
Phenylalanine	Isovalerate	0,5694	67	0,3813	0,7122	<,0001
Phenylalanine	Lactate	0,8752	67	0,8041	0,9217	<,0001
Phenylalanine	Leucine	0,7202	67	0,5804	0,8188	<,0001
Phenylalanine	Lysine	0,8955	67	0,8349	0,9347	<,0001
Phenylalanine	Maltose	0,8624	67	0,7848	0,9134	<,0001
Phenylalanine	Methanol	0,9015	67	0,8440	0,9385	<,0001
Phenylalanine	Methylamine	0,7998	67	0,6927	0,8724	<,0001
Phenylalanine	Nicotinate	0,9732	67	0,9566	0,9835	<,0001
Phenylalanine	N-nitrosodimethylamine	0,8554	67	0,7742	0,9088	<,0001
Phenylalanine	N-Phenylacetylglycine	0,8995	67	0,8409	0,9372	<,0001
Phenylalanine	Ornithine	0,8749	67	0,8036	0,9215	<,0001
Phenylalanine	Phenylacetate	0,9061	67	0,8512	0,9414	<,0001
Pimelate	1,3-Dihydroxyacetone	0,6297	67	0,4589	0,7556	<,0001
Pimelate	2-Phenylpropionate	0,8148	67	0,7144	0,8823	<,0001
Pimelate	3-Hydroxybutyrate	0,7577	67	0,6326	0,8442	<,0001
Pimelate	3-Hydroxyphenylacetate	0,8450	67	0,7587	0,9021	<,0001
Pimelate	3-Phenylpropionate	0,7650	67	0,6429	0,8492	<,0001
Pimelate	4-Hydroxybutyrate	0,8902	67	0,8269	0,9313	<,0001
Pimelate	Acetate	0,5990	67	0,4191	0,7337	<,0001
Pimelate	Acetoacetate	0,9847	67	0,9751	0,9906	<,0001
Pimelate	Acetone	0,9157	67	0,8660	0,9475	<,0001
Pimelate	Adipate	0,9701	67	0,9516	0,9816	<,0001
Pimelate	Alanine	0,8698	67	0,7958	0,9182	<,0001
Pimelate	Allantoin	0,1781	67	-0,0649	0,4011	0,1494
Pimelate	Aspartate	0,8616	67	0,7835	0,9129	<,0001
Pimelate	Benzoate	0,7740	67	0,6557	0,8552	<,0001
Pimelate	Butyrate	0,9774	67	0,9633	0,9861	<,0001
Pimelate	Cadaverine	0,7770	67	0,6600	0,8572	<,0001
Pimelate	Caffeine	0,7699	67	0,6499	0,8525	<,0001
Pimelate	Carnitine	0,9180	67	0,8696	0,9490	<,0001
Pimelate	Choline	0,8415	67	0,7536	0,8998	<,0001
Pimelate	Dimethylamine	0,0044	67	-0,2361	0,2443	0,9720
Pimelate	Ethanol	0,8450	67	0,7589	0,9021	<,0001
Pimelate	Ferulate	0,7934	67	0,6835	0,8682	<,0001
Pimelate	Formate	0,7770	67	0,6600	0,8572	<,0001
Pimelate	Fumarate	0,6432	67	0,4767	0,7652	<,0001
Pimelate	Glucose	0,8253	67	0,7297	0,8892	<,0001
Pimelate	Glutamate	0,8852	67	0,8192	0,9281	<,0001
Pimelate	Glycerol	0,8487	67	0,7643	0,9045	<,0001
Pimelate	Glycine	0,6346	67	0,4653	0,7591	<,0001
Pimelate	Histidine	0,7652	67	0,6432	0,8493	<,0001
Pimelate	Hypoxanthine	0,7813	67	0,6660	0,8601	<,0001
Pimelate	Imidazole	0,7528	67	0,6257	0,8409	<,0001
Pimelate	Isobutyrate	0,8376	67	0,7478	0,8973	<,0001
Pimelate	Isoleucine	0,8942	67	0,8329	0,9338	<,0001
Pimelate	Isopropanol	0,8039	67	0,6986	0,8751	<,0001
Pimelate	Isovalerate	0,5935	67	0,4121	0,7297	<,0001
Pimelate	Lactate	0,8557	67	0,7747	0,9090	<,0001
Pimelate	Leucine	0,8811	67	0,8130	0,9254	<,0001
Pimelate	Lysine	0,8636	67	0,7865	0,9141	<,0001
Pimelate	Maltose	0,8120	67	0,7103	0,8804	<,0001
Pimelate	Methanol	0,7505	67	0,6225	0,8394	<,0001
Pimelate	Methylamine	0,7876	67	0,6751	0,8643	<,0001
Pimelate	Nicotinate	0,7703	67	0,6505	0,8527	<,0001
Pimelate	N-nitrosodimethylamine	0,8306	67	0,7375	0,8927	<,0001
Pimelate	N-Phenylacetylglycine	0,8460	67	0,7603	0,9028	<,0001
Pimelate	Ornithine	0,8492	67	0,7651	0,9049	<,0001
Pimelate	Phenylacetate	0,7843	67	0,6704	0,8621	<,0001
Pimelate	Phenylalanine	0,8080	67	0,7045	0,8778	<,0001
Proline	1,3-Dihydroxyacetone	0,8812	67	0,8130	0,9255	<,0001
Proline	2-Phenylpropionate	0,9362	67	0,8979	0,9604	<,0001
Proline	3-Hydroxybutyrate	0,8661	67	0,7903	0,9158	<,0001
Proline	3-Hydroxyphenylacetate	0,9853	67	0,9761	0,9910	<,0001
Proline	3-Phenylpropionate	0,9544	67	0,9266	0,9718	<,0001
Proline	4-Hydroxybutyrate	0,9327	67	0,8925	0,9582	<,0001
Proline	Acetate	0,0564	67	-0,1864	0,2926	0,6506
Proline	Acetoacetate	0,8079	67	0,7044	0,8778	<,0001
Proline	Acetone	0,9302	67	0,8885	0,9567	<,0001
Proline	Adipate	0,8879	67	0,8233	0,9298	<,0001
Proline	Alanine	0,7599	67	0,6358	0,8457	<,0001
Proline	Allantoin	0,1790	67	-0,0640	0,4019	0,1472
Proline	Aspartate	0,9466	67	0,9143	0,9669	<,0001
Proline	Benzoate	0,9346	67	0,8954	0,9594	<,0001
Proline	Butyrate	0,7216	67	0,5824	0,8197	<,0001
Proline	Cadaverine	0,9220	67	0,8758	0,9515	<,0001
Proline	Caffeine	0,9944	67	0,9908	0,9965	<,0001
Proline	Carnitine	0,7544	67	0,6280	0,8420	<,0001
Proline	Choline	0,9398	67	0,9036	0,9627	<,0001
Proline	Dimethylamine	0,2094	67	-0,0324	0,4281	0,0890
Proline	Ethanol	0,9295	67	0,8875	0,9562	<,0001
Proline	Ferulate	0,9509	67	0,9210	0,9696	<,0001
Proline	Formate	0,9525	67	0,9237	0,9707	<,0001
Proline	Fumarate	0,7947	67	0,6853	0,8690	<,0001
Proline	Glucose	0,8075	67	0,7039	0,8775	<,0001
Proline	Glutamate	0,9411	67	0,9057	0,9635	<,0001
Proline	Glycerol	0,9730	67	0,9564	0,9834	<,0001
Proline	Glycine	0,0573	67	-0,1855	0,2935	0,6450
Proline	Histidine	0,9480	67	0,9165	0,9678	<,0001
Proline	Hypoxanthine	0,9545	67	0,9268	0,9719	<,0001
Proline	Imidazole	0,9344	67	0,8951	0,9593	<,0001
Proline	Isobutyrate	0,5383	67	0,3424	0,6894	<,0001
Proline	Isoleucine	0,7673	67	0,6462	0,8507	<,0001
Proline	Isopropanol	0,9372	67	0,8995	0,9611	<,0001
Proline	Isovalerate	0,4725	67	0,2620	0,6401	<,0001
Proline	Lactate	0,8457	67	0,7598	0,9025	<,0001
Proline	Leucine	0,6689	67	0,5108	0,7833	<,0001
Proline	Lysine	0,9495	67	0,9189	0,9688	<,0001
Proline	Maltose	0,6816	67	0,5278	0,7921	<,0001
Proline	Methanol	0,9872	67	0,9792	0,9921	<,0001
Proline	Methylamine	0,7881	67	0,6759	0,8646	<,0001
Proline	Nicotinate	0,9563	67	0,9296	0,9730	<,0001
Proline	N-nitrosodimethylamine	0,9217	67	0,8752	0,9513	<,0001
Proline	N-Phenylacetylglycine	0,9714	67	0,9537	0,9824	<,0001
Proline	Ornithine	0,8892	67	0,8253	0,9306	<,0001
Proline	Phenylacetate	0,8865	67	0,8211	0,9289	<,0001
Proline	Phenylalanine	0,9191	67	0,8713	0,9497	<,0001
Proline	Pimelate	0,7732	67	0,6545	0,8547	<,0001
Propionate	1,3-Dihydroxyacetone	0,4402	67	0,2237	0,6154	0,0002
Propionate	2-Phenylpropionate	0,6409	67	0,4736	0,7636	<,0001
Propionate	3-Hydroxybutyrate	0,5803	67	0,3951	0,7201	<,0001
Propionate	3-Hydroxyphenylacetate	0,6203	67	0,4466	0,7489	<,0001
Propionate	3-Phenylpropionate	0,5300	67	0,3320	0,6832	<,0001
Propionate	4-Hydroxybutyrate	0,7124	67	0,5697	0,8134	<,0001
Propionate	Acetate	0,8134	67	0,7123	0,8814	<,0001
Propionate	Acetoacetate	0,8856	67	0,8198	0,9284	<,0001
Propionate	Acetone	0,7526	67	0,6255	0,8408	<,0001
Propionate	Adipate	0,8110	67	0,7088	0,8798	<,0001
Propionate	Alanine	0,7837	67	0,6696	0,8617	<,0001
Propionate	Allantoin	0,1359	67	-0,1079	0,3642	0,2729
Propionate	Aspartate	0,6842	67	0,5313	0,7939	<,0001
Propionate	Benzoate	0,5271	67	0,3284	0,6810	<,0001
Propionate	Butyrate	0,9304	67	0,8889	0,9568	<,0001
Propionate	Cadaverine	0,5669	67	0,3782	0,7104	<,0001
Propionate	Caffeine	0,5429	67	0,3481	0,6928	<,0001
Propionate	Carnitine	0,7987	67	0,6911	0,8717	<,0001
Propionate	Choline	0,6310	67	0,4606	0,7565	<,0001
Propionate	Dimethylamine	0,0288	67	-0,2129	0,2671	0,8172
Propionate	Ethanol	0,6648	67	0,5053	0,7804	<,0001
Propionate	Ferulate	0,6011	67	0,4218	0,7352	<,0001
Propionate	Formate	0,5648	67	0,3756	0,7088	<,0001
Propionate	Fumarate	0,4543	67	0,2403	0,6262	0,0001
Propionate	Glucose	0,7089	67	0,5648	0,8110	<,0001
Propionate	Glutamate	0,6861	67	0,5339	0,7952	<,0001
Propionate	Glycerol	0,6316	67	0,4615	0,7570	<,0001
Propionate	Glycine	0,7938	67	0,6840	0,8684	<,0001
Propionate	Histidine	0,5193	67	0,3188	0,6753	<,0001
Propionate	Hypoxanthine	0,5596	67	0,3690	0,7050	<,0001
Propionate	Imidazole	0,4979	67	0,2927	0,6593	<,0001
Propionate	Isobutyrate	0,8942	67	0,8329	0,9338	<,0001
Propionate	Isoleucine	0,7710	67	0,6514	0,8532	<,0001
Propionate	Isopropanol	0,6163	67	0,4414	0,7460	<,0001
Propionate	Isovalerate	0,5992	67	0,4193	0,7338	<,0001
Propionate	Lactate	0,7297	67	0,5936	0,8253	<,0001
Propionate	Leucine	0,8151	67	0,7149	0,8825	<,0001
Propionate	Lysine	0,6696	67	0,5117	0,7838	<,0001
Propionate	Maltose	0,6878	67	0,5361	0,7964	<,0001
Propionate	Methanol	0,5289	67	0,3308	0,6824	<,0001
Propionate	Methylamine	0,6848	67	0,5321	0,7943	<,0001
Propionate	Nicotinate	0,5083	67	0,3054	0,6671	<,0001
Propionate	N-nitrosodimethylamine	0,6499	67	0,4855	0,7699	<,0001
Propionate	N-Phenylacetylglycine	0,6373	67	0,4689	0,7610	<,0001
Propionate	Ornithine	0,6542	67	0,4912	0,7729	<,0001
Propionate	Phenylacetate	0,6200	67	0,4463	0,7487	<,0001
Propionate	Phenylalanine	0,5795	67	0,3942	0,7195	<,0001
Propionate	Pimelate	0,9174	67	0,8686	0,9486	<,0001
Propionate	Proline	0,5285	67	0,3302	0,6821	<,0001
Ribose	1,3-Dihydroxyacetone	0,7162	67	0,5749	0,8160	<,0001
Ribose	2-Phenylpropionate	0,9234	67	0,8779	0,9523	<,0001
Ribose	3-Hydroxybutyrate	0,8655	67	0,7894	0,9154	<,0001
Ribose	3-Hydroxyphenylacetate	0,9068	67	0,8522	0,9418	<,0001
Ribose	3-Phenylpropionate	0,9345	67	0,8953	0,9594	<,0001
Ribose	4-Hydroxybutyrate	0,8883	67	0,8239	0,9301	<,0001
Ribose	Acetate	0,1229	67	-0,1209	0,3527	0,3219
Ribose	Acetoacetate	0,8255	67	0,7300	0,8893	<,0001
Ribose	Acetone	0,9207	67	0,8737	0,9506	<,0001
Ribose	Adipate	0,8737	67	0,8017	0,9207	<,0001
Ribose	Alanine	0,7783	67	0,6618	0,8581	<,0001
Ribose	Allantoin	0,2400	67	-0,0002	0,4540	0,0504
Ribose	Aspartate	0,9294	67	0,8872	0,9561	<,0001
Ribose	Benzoate	0,9347	67	0,8955	0,9595	<,0001
Ribose	Butyrate	0,7582	67	0,6333	0,8446	<,0001
Ribose	Cadaverine	0,8518	67	0,7689	0,9065	<,0001
Ribose	Caffeine	0,9249	67	0,8802	0,9533	<,0001
Ribose	Carnitine	0,7446	67	0,6142	0,8354	<,0001
Ribose	Choline	0,8803	67	0,8117	0,9249	<,0001
Ribose	Dimethylamine	0,2252	67	-0,0158	0,4416	0,0669
Ribose	Ethanol	0,9384	67	0,9014	0,9618	<,0001
Ribose	Ferulate	0,8757	67	0,8048	0,9220	<,0001
Ribose	Formate	0,9701	67	0,9516	0,9816	<,0001
Ribose	Fumarate	0,8331	67	0,7412	0,8943	<,0001
Ribose	Glucose	0,9478	67	0,9161	0,9677	<,0001
Ribose	Glutamate	0,8996	67	0,8412	0,9373	<,0001
Ribose	Glycerol	0,9041	67	0,8481	0,9402	<,0001
Ribose	Glycine	0,1380	67	-0,1057	0,3661	0,2653
Ribose	Histidine	0,9465	67	0,9141	0,9669	<,0001
Ribose	Hypoxanthine	0,9643	67	0,9424	0,9780	<,0001
Ribose	Imidazole	0,9303	67	0,8887	0,9567	<,0001
Ribose	Isobutyrate	0,6043	67	0,4259	0,7375	<,0001
Ribose	Isoleucine	0,8052	67	0,7005	0,8760	<,0001
Ribose	Isopropanol	0,9196	67	0,8721	0,9500	<,0001
Ribose	Isovalerate	0,5249	67	0,3258	0,6794	<,0001
Ribose	Lactate	0,8715	67	0,7984	0,9192	<,0001
Ribose	Leucine	0,7272	67	0,5901	0,8236	<,0001
Ribose	Lysine	0,9042	67	0,8482	0,9402	<,0001
Ribose	Maltose	0,8368	67	0,7467	0,8968	<,0001
Ribose	Methanol	0,9193	67	0,8715	0,9497	<,0001
Ribose	Methylamine	0,7987	67	0,6910	0,8717	<,0001
Ribose	Nicotinate	0,9216	67	0,8751	0,9512	<,0001
Ribose	N-nitrosodimethylamine	0,8724	67	0,7997	0,9198	<,0001
Ribose	N-Phenylacetylglycine	0,8901	67	0,8267	0,9312	<,0001
Ribose	Ornithine	0,8534	67	0,7713	0,9076	<,0001
Ribose	Phenylacetate	0,8470	67	0,7618	0,9034	<,0001
Ribose	Phenylalanine	0,9247	67	0,8799	0,9532	<,0001
Ribose	Pimelate	0,7829	67	0,6683	0,8611	<,0001
Ribose	Proline	0,9121	67	0,8603	0,9452	<,0001
Ribose	Propionate	0,6145	67	0,4391	0,7447	<,0001
Serine	1,3-Dihydroxyacetone	0,9152	67	0,8652	0,9472	<,0001
Serine	2-Phenylpropionate	0,9253	67	0,8809	0,9536	<,0001
Serine	3-Hydroxybutyrate	0,8773	67	0,8073	0,9230	<,0001
Serine	3-Hydroxyphenylacetate	0,9707	67	0,9527	0,9820	<,0001
Serine	3-Phenylpropionate	0,9051	67	0,8497	0,9408	<,0001
Serine	4-Hydroxybutyrate	0,9695	67	0,9506	0,9812	<,0001
Serine	Acetate	0,1211	67	-0,1226	0,3511	0,3288
Serine	Acetoacetate	0,8469	67	0,7617	0,9034	<,0001
Serine	Acetone	0,9294	67	0,8872	0,9561	<,0001
Serine	Adipate	0,8985	67	0,8395	0,9366	<,0001
Serine	Alanine	0,7834	67	0,6690	0,8615	<,0001
Serine	Allantoin	0,1104	67	-0,1333	0,3416	0,3737
Serine	Aspartate	0,9718	67	0,9543	0,9826	<,0001
Serine	Benzoate	0,8588	67	0,7794	0,9111	<,0001
Serine	Butyrate	0,7562	67	0,6305	0,8432	<,0001
Serine	Cadaverine	0,9289	67	0,8864	0,9558	<,0001
Serine	Caffeine	0,9650	67	0,9436	0,9784	<,0001
Serine	Carnitine	0,8211	67	0,7237	0,8865	<,0001
Serine	Choline	0,9511	67	0,9214	0,9697	<,0001
Serine	Dimethylamine	0,1868	67	-0,0559	0,4087	0,1301
Serine	Ethanol	0,9401	67	0,9040	0,9629	<,0001
Serine	Ferulate	0,9523	67	0,9234	0,9705	<,0001
Serine	Formate	0,8872	67	0,8222	0,9293	<,0001
Serine	Fumarate	0,7108	67	0,5675	0,8123	<,0001
Serine	Glucose	0,7700	67	0,6501	0,8525	<,0001
Serine	Glutamate	0,9558	67	0,9288	0,9727	<,0001
Serine	Glycerol	0,9891	67	0,9823	0,9933	<,0001
Serine	Glycine	0,1545	67	-0,0890	0,3806	0,2120
Serine	Histidine	0,8764	67	0,8058	0,9224	<,0001
Serine	Hypoxanthine	0,8871	67	0,8220	0,9293	<,0001
Serine	Imidazole	0,8565	67	0,7759	0,9096	<,0001
Serine	Isobutyrate	0,5805	67	0,3954	0,7202	<,0001
Serine	Isoleucine	0,8273	67	0,7327	0,8906	<,0001
Serine	Isopropanol	0,9148	67	0,8646	0,9469	<,0001
Serine	Isovalerate	0,5188	67	0,3183	0,6749	<,0001
Serine	Lactate	0,8709	67	0,7975	0,9189	<,0001
Serine	Leucine	0,7551	67	0,6290	0,8425	<,0001
Serine	Lysine	0,9653	67	0,9440	0,9786	<,0001
Serine	Maltose	0,6537	67	0,4905	0,7726	<,0001
Serine	Methanol	0,9562	67	0,9295	0,9729	<,0001
Serine	Methylamine	0,8084	67	0,7052	0,8781	<,0001
Serine	Nicotinate	0,8873	67	0,8224	0,9294	<,0001
Serine	N-nitrosodimethylamine	0,9582	67	0,9327	0,9742	<,0001
Serine	N-Phenylacetylglycine	0,9863	67	0,9778	0,9916	<,0001
Serine	Ornithine	0,8889	67	0,8248	0,9304	<,0001
Serine	Phenylacetate	0,8754	67	0,8043	0,9217	<,0001
Serine	Phenylalanine	0,8632	67	0,7860	0,9139	<,0001
Serine	Pimelate	0,8092	67	0,7063	0,8786	<,0001
Serine	Proline	0,9712	67	0,9534	0,9822	<,0001
Serine	Propionate	0,5892	67	0,4065	0,7266	<,0001
Serine	Ribose	0,8698	67	0,7958	0,9182	<,0001
Succinate	1,3-Dihydroxyacetone	0,8676	67	0,7925	0,9167	<,0001
Succinate	2-Phenylpropionate	0,9603	67	0,9359	0,9755	<,0001
Succinate	3-Hydroxybutyrate	0,9306	67	0,8891	0,9569	<,0001
Succinate	3-Hydroxyphenylacetate	0,9602	67	0,9359	0,9755	<,0001
Succinate	3-Phenylpropionate	0,9681	67	0,9485	0,9803	<,0001
Succinate	4-Hydroxybutyrate	0,9364	67	0,8982	0,9606	<,0001
Succinate	Acetate	0,1465	67	-0,0971	0,3736	0,2368
Succinate	Acetoacetate	0,8379	67	0,7482	0,8974	<,0001
Succinate	Acetone	0,9483	67	0,9170	0,9680	<,0001
Succinate	Adipate	0,8963	67	0,8361	0,9352	<,0001
Succinate	Alanine	0,8006	67	0,6938	0,8729	<,0001
Succinate	Allantoin	0,2854	67	0,0485	0,4919	0,0192
Succinate	Aspartate	0,9584	67	0,9329	0,9743	<,0001
Succinate	Benzoate	0,9243	67	0,8793	0,9529	<,0001
Succinate	Butyrate	0,7690	67	0,6487	0,8519	<,0001
Succinate	Cadaverine	0,9252	67	0,8807	0,9535	<,0001
Succinate	Caffeine	0,9713	67	0,9536	0,9823	<,0001
Succinate	Carnitine	0,7967	67	0,6882	0,8704	<,0001
Succinate	Choline	0,9220	67	0,8757	0,9515	<,0001
Succinate	Dimethylamine	0,3006	67	0,0650	0,5044	0,0135
Succinate	Ethanol	0,9545	67	0,9268	0,9719	<,0001
Succinate	Ferulate	0,9446	67	0,9112	0,9657	<,0001
Succinate	Formate	0,9507	67	0,9207	0,9695	<,0001
Succinate	Fumarate	0,8318	67	0,7393	0,8935	<,0001
Succinate	Glucose	0,8375	67	0,7478	0,8972	<,0001
Succinate	Glutamate	0,9279	67	0,8850	0,9552	<,0001
Succinate	Glycerol	0,9656	67	0,9445	0,9788	<,0001
Succinate	Glycine	0,1300	67	-0,1137	0,3590	0,2943
Succinate	Histidine	0,9382	67	0,9010	0,9617	<,0001
Succinate	Hypoxanthine	0,9483	67	0,9170	0,9680	<,0001
Succinate	Imidazole	0,9221	67	0,8758	0,9515	<,0001
Succinate	Isobutyrate	0,6367	67	0,4680	0,7605	<,0001
Succinate	Isoleucine	0,8330	67	0,7410	0,8942	<,0001
Succinate	Isopropanol	0,9745	67	0,9588	0,9843	<,0001
Succinate	Isovalerate	0,6067	67	0,4290	0,7392	<,0001
Succinate	Lactate	0,9146	67	0,8643	0,9468	<,0001
Succinate	Leucine	0,7139	67	0,5717	0,8144	<,0001
Succinate	Lysine	0,9282	67	0,8855	0,9554	<,0001
Succinate	Maltose	0,7206	67	0,5810	0,8190	<,0001
Succinate	Methanol	0,9621	67	0,9389	0,9766	<,0001
Succinate	Methylamine	0,8574	67	0,7773	0,9102	<,0001
Succinate	Nicotinate	0,9341	67	0,8946	0,9591	<,0001
Succinate	N-nitrosodimethylamine	0,9163	67	0,8669	0,9479	<,0001
Succinate	N-Phenylacetylglycine	0,9567	67	0,9302	0,9732	<,0001
Succinate	Ornithine	0,9009	67	0,8431	0,9381	<,0001
Succinate	Phenylacetate	0,9127	67	0,8614	0,9456	<,0001
Succinate	Phenylalanine	0,9251	67	0,8806	0,9535	<,0001
Succinate	Pimelate	0,8081	67	0,7047	0,8779	<,0001
Succinate	Proline	0,9654	67	0,9441	0,9786	<,0001
Succinate	Propionate	0,6036	67	0,4250	0,7370	<,0001
Succinate	Ribose	0,9222	67	0,8761	0,9516	<,0001
Succinate	Serine	0,9523	67	0,9233	0,9705	<,0001
Trimethylamine	1,3-Dihydroxyacetone	0,3262	67	0,0933	0,5253	0,0071
Trimethylamine	2-Phenylpropionate	0,2703	67	0,0322	0,4794	0,0270
Trimethylamine	3-Hydroxybutyrate	0,3555	67	0,1261	0,5489	0,0032
Trimethylamine	3-Hydroxyphenylacetate	0,0702	67	-0,1729	0,3053	0,5722
Trimethylamine	3-Phenylpropionate	0,2538	67	0,0145	0,4657	0,0382
Trimethylamine	4-Hydroxybutyrate	0,1190	67	-0,1247	0,3493	0,3373
Trimethylamine	Acetate	-0,0985	67	-0,3309	0,1451	0,4278
Trimethylamine	Acetoacetate	0,0049	67	-0,2356	0,2448	0,9687
Trimethylamine	Acetone	0,0671	67	-0,1759	0,3025	0,5893
Trimethylamine	Adipate	-0,0101	67	-0,2497	0,2306	0,9350
Trimethylamine	Alanine	0,0769	67	-0,1663	0,3114	0,5360
Trimethylamine	Allantoin	0,5336	67	0,3365	0,6859	<,0001
Trimethylamine	Aspartate	0,1495	67	-0,0941	0,3762	0,2272
Trimethylamine	Benzoate	0,1091	67	-0,1347	0,3403	0,3797
Trimethylamine	Butyrate	0,0268	67	-0,2148	0,2653	0,8296
Trimethylamine	Cadaverine	0,2947	67	0,0586	0,4995	0,0155
Trimethylamine	Caffeine	0,1368	67	-0,1069	0,3650	0,2697
Trimethylamine	Carnitine	0,1079	67	-0,1358	0,3393	0,3847
Trimethylamine	Choline	0,0963	67	-0,1473	0,3289	0,4383
Trimethylamine	Dimethylamine	0,7755	67	0,6578	0,8562	<,0001
Trimethylamine	Ethanol	0,0937	67	-0,1499	0,3266	0,4508
Trimethylamine	Ferulate	0,2120	67	-0,0298	0,4303	0,0851
Trimethylamine	Formate	0,1088	67	-0,1349	0,3401	0,3809
Trimethylamine	Fumarate	0,3744	67	0,1475	0,5639	0,0018
Trimethylamine	Glucose	0,0699	67	-0,1732	0,3050	0,5742
Trimethylamine	Glutamate	0,0461	67	-0,1962	0,2832	0,7108
Trimethylamine	Glycerol	0,0955	67	-0,1481	0,3281	0,4422
Trimethylamine	Glycine	-0,0761	67	-0,3107	0,1671	0,5403
Trimethylamine	Histidine	0,1191	67	-0,1247	0,3493	0,3371
Trimethylamine	Hypoxanthine	0,1174	67	-0,1263	0,3478	0,3439
Trimethylamine	Imidazole	0,1200	67	-0,1238	0,3501	0,3336
Trimethylamine	Isobutyrate	0,2218	67	-0,0195	0,4386	0,0713
Trimethylamine	Isoleucine	0,0398	67	-0,2023	0,2774	0,7490
Trimethylamine	Isopropanol	0,3176	67	0,0838	0,5183	0,0088
Trimethylamine	Isovalerate	0,6025	67	0,4236	0,7362	<,0001
Trimethylamine	Lactate	0,3212	67	0,0877	0,5212	0,0081
Trimethylamine	Leucine	0,0643	67	-0,1787	0,2999	0,6053
Trimethylamine	Lysine	0,0565	67	-0,1863	0,2927	0,6500
Trimethylamine	Maltose	0,0209	67	-0,2204	0,2598	0,8669
Trimethylamine	Methanol	0,1477	67	-0,0959	0,3746	0,2330
Trimethylamine	Methylamine	0,3578	67	0,1286	0,5507	0,0030
Trimethylamine	Nicotinate	0,0849	67	-0,1585	0,3186	0,4944
Trimethylamine	N-nitrosodimethylamine	0,1094	67	-0,1343	0,3407	0,3780
Trimethylamine	N-Phenylacetylglycine	0,1362	67	-0,1075	0,3645	0,2716
Trimethylamine	Ornithine	0,1299	67	-0,1139	0,3589	0,2948
Trimethylamine	Phenylacetate	0,3581	67	0,1289	0,5509	0,0029
Trimethylamine	Phenylalanine	0,1853	67	-0,0575	0,4074	0,1333
Trimethylamine	Pimelate	-0,0142	67	-0,2535	0,2268	0,9095
Trimethylamine	Proline	0,1219	67	-0,1219	0,3518	0,3257
Trimethylamine	Propionate	-0,0124	67	-0,2518	0,2285	0,9209
Trimethylamine	Ribose	0,1124	67	-0,1314	0,3433	0,3652
Trimethylamine	Serine	0,1300	67	-0,1138	0,3590	0,2944
Trimethylamine	Succinate	0,2352	67	-0,0053	0,4500	0,0554
Tyrosine	1,3-Dihydroxyacetone	0,6829	67	0,5296	0,7930	<,0001
Tyrosine	2-Phenylpropionate	0,9280	67	0,8851	0,9553	<,0001
Tyrosine	3-Hydroxybutyrate	0,8565	67	0,7760	0,9096	<,0001
Tyrosine	3-Hydroxyphenylacetate	0,9246	67	0,8797	0,9531	<,0001
Tyrosine	3-Phenylpropionate	0,9638	67	0,9416	0,9777	<,0001
Tyrosine	4-Hydroxybutyrate	0,8905	67	0,8272	0,9314	<,0001
Tyrosine	Acetate	0,1683	67	-0,0749	0,3926	0,1734
Tyrosine	Acetoacetate	0,8619	67	0,7841	0,9131	<,0001
Tyrosine	Acetone	0,9249	67	0,8802	0,9533	<,0001
Tyrosine	Adipate	0,9145	67	0,8642	0,9468	<,0001
Tyrosine	Alanine	0,8053	67	0,7006	0,8760	<,0001
Tyrosine	Allantoin	0,3371	67	0,1054	0,5340	0,0053
Tyrosine	Aspartate	0,9088	67	0,8553	0,9431	<,0001
Tyrosine	Benzoate	0,9839	67	0,9738	0,9901	<,0001
Tyrosine	Butyrate	0,7983	67	0,6905	0,8714	<,0001
Tyrosine	Cadaverine	0,8863	67	0,8209	0,9288	<,0001
Tyrosine	Caffeine	0,9203	67	0,8731	0,9504	<,0001
Tyrosine	Carnitine	0,7962	67	0,6874	0,8700	<,0001
Tyrosine	Choline	0,8997	67	0,8413	0,9373	<,0001
Tyrosine	Dimethylamine	0,1829	67	-0,0599	0,4053	0,1384
Tyrosine	Ethanol	0,9087	67	0,8552	0,9431	<,0001
Tyrosine	Ferulate	0,8803	67	0,8118	0,9250	<,0001
Tyrosine	Formate	0,9751	67	0,9597	0,9847	<,0001
Tyrosine	Fumarate	0,8880	67	0,8235	0,9299	<,0001
Tyrosine	Glucose	0,9405	67	0,9046	0,9631	<,0001
Tyrosine	Glutamate	0,8996	67	0,8411	0,9372	<,0001
Tyrosine	Glycerol	0,9064	67	0,8516	0,9416	<,0001
Tyrosine	Glycine	0,2128	67	-0,0289	0,4310	0,0838
Tyrosine	Histidine	0,9812	67	0,9695	0,9885	<,0001
Tyrosine	Hypoxanthine	0,9830	67	0,9724	0,9896	<,0001
Tyrosine	Imidazole	0,9786	67	0,9653	0,9868	<,0001
Tyrosine	Isobutyrate	0,6147	67	0,4394	0,7449	<,0001
Tyrosine	Isoleucine	0,8156	67	0,7156	0,8828	<,0001
Tyrosine	Isopropanol	0,9313	67	0,8903	0,9573	<,0001
Tyrosine	Isovalerate	0,5340	67	0,3370	0,6862	<,0001
Tyrosine	Lactate	0,8720	67	0,7992	0,9196	<,0001
Tyrosine	Leucine	0,7367	67	0,6033	0,8300	<,0001
Tyrosine	Lysine	0,9055	67	0,8503	0,9411	<,0001
Tyrosine	Maltose	0,8884	67	0,8241	0,9301	<,0001
Tyrosine	Methanol	0,9051	67	0,8496	0,9408	<,0001
Tyrosine	Methylamine	0,7974	67	0,6892	0,8708	<,0001
Tyrosine	Nicotinate	0,9714	67	0,9537	0,9824	<,0001
Tyrosine	N-nitrosodimethylamine	0,8617	67	0,7836	0,9129	<,0001
Tyrosine	N-Phenylacetylglycine	0,8990	67	0,8402	0,9369	<,0001
Tyrosine	Ornithine	0,8803	67	0,8118	0,9249	<,0001
Tyrosine	Phenylacetate	0,8851	67	0,8191	0,9280	<,0001
Tyrosine	Phenylalanine	0,9890	67	0,9821	0,9933	<,0001
Tyrosine	Pimelate	0,8326	67	0,7404	0,8940	<,0001
Tyrosine	Proline	0,9175	67	0,8688	0,9486	<,0001
Tyrosine	Propionate	0,6235	67	0,4509	0,7512	<,0001
Tyrosine	Ribose	0,9514	67	0,9219	0,9700	<,0001
Tyrosine	Serine	0,8605	67	0,7819	0,9121	<,0001
Tyrosine	Succinate	0,9216	67	0,8751	0,9512	<,0001
Tyrosine	Trimethylamine	0,1149	67	-0,1289	0,3456	0,3545
Uracil	1,3-Dihydroxyacetone	0,6169	67	0,4422	0,7465	<,0001
Uracil	2-Phenylpropionate	0,8850	67	0,8189	0,9280	<,0001
Uracil	3-Hydroxybutyrate	0,8212	67	0,7238	0,8866	<,0001
Uracil	3-Hydroxyphenylacetate	0,8496	67	0,7657	0,9051	<,0001
Uracil	3-Phenylpropionate	0,9365	67	0,8983	0,9606	<,0001
Uracil	4-Hydroxybutyrate	0,7883	67	0,6761	0,8647	<,0001
Uracil	Acetate	0,0905	67	-0,1530	0,3237	0,4662
Uracil	Acetoacetate	0,7492	67	0,6207	0,8385	<,0001
Uracil	Acetone	0,8554	67	0,7743	0,9089	<,0001
Uracil	Adipate	0,8146	67	0,7142	0,8822	<,0001
Uracil	Alanine	0,7414	67	0,6099	0,8333	<,0001
Uracil	Allantoin	0,4333	67	0,2155	0,6100	0,0002
Uracil	Aspartate	0,8303	67	0,7371	0,8925	<,0001
Uracil	Benzoate	0,9666	67	0,9460	0,9794	<,0001
Uracil	Butyrate	0,6979	67	0,5499	0,8034	<,0001
Uracil	Cadaverine	0,8270	67	0,7322	0,8903	<,0001
Uracil	Caffeine	0,8727	67	0,8002	0,9200	<,0001
Uracil	Carnitine	0,6717	67	0,5145	0,7852	<,0001
Uracil	Choline	0,8066	67	0,7025	0,8769	<,0001
Uracil	Dimethylamine	0,2702	67	0,0321	0,4793	0,0270
Uracil	Ethanol	0,8475	67	0,7625	0,9037	<,0001
Uracil	Ferulate	0,8143	67	0,7137	0,8820	<,0001
Uracil	Formate	0,9609	67	0,9370	0,9759	<,0001
Uracil	Fumarate	0,9441	67	0,9103	0,9654	<,0001
Uracil	Glucose	0,9142	67	0,8636	0,9465	<,0001
Uracil	Glutamate	0,8102	67	0,7077	0,8793	<,0001
Uracil	Glycerol	0,8200	67	0,7220	0,8857	<,0001
Uracil	Glycine	0,0998	67	-0,1439	0,3320	0,4217
Uracil	Histidine	0,9587	67	0,9335	0,9745	<,0001
Uracil	Hypoxanthine	0,9656	67	0,9445	0,9788	<,0001
Uracil	Imidazole	0,9625	67	0,9395	0,9769	<,0001
Uracil	Isobutyrate	0,5472	67	0,3534	0,6959	<,0001
Uracil	Isoleucine	0,7173	67	0,5764	0,8168	<,0001
Uracil	Isopropanol	0,9059	67	0,8509	0,9413	<,0001
Uracil	Isovalerate	0,5350	67	0,3383	0,6869	<,0001
Uracil	Lactate	0,8288	67	0,7349	0,8915	<,0001
Uracil	Leucine	0,6297	67	0,4589	0,7556	<,0001
Uracil	Lysine	0,8115	67	0,7097	0,8802	<,0001
Uracil	Maltose	0,8411	67	0,7530	0,8996	<,0001
Uracil	Methanol	0,8645	67	0,7879	0,9148	<,0001
Uracil	Methylamine	0,7524	67	0,6252	0,8407	<,0001
Uracil	Nicotinate	0,9362	67	0,8980	0,9604	<,0001
Uracil	N-nitrosodimethylamine	0,7715	67	0,6522	0,8536	<,0001
Uracil	N-Phenylacetylglycine	0,8095	67	0,7067	0,8788	<,0001
Uracil	Ornithine	0,8210	67	0,7235	0,8864	<,0001
Uracil	Phenylacetate	0,8643	67	0,7876	0,9146	<,0001
Uracil	Phenylalanine	0,9609	67	0,9369	0,9758	<,0001
Uracil	Pimelate	0,7188	67	0,5785	0,8178	<,0001
Uracil	Proline	0,8601	67	0,7814	0,9119	<,0001
Uracil	Propionate	0,5247	67	0,3255	0,6793	<,0001
Uracil	Ribose	0,9349	67	0,8958	0,9596	<,0001
Uracil	Serine	0,7666	67	0,6452	0,8502	<,0001
Uracil	Succinate	0,8811	67	0,8130	0,9255	<,0001
Uracil	Trimethylamine	0,1964	67	-0,0460	0,4169	0,1113
Uracil	Tyrosine	0,9659	67	0,9449	0,9789	<,0001
Urea	1,3-Dihydroxyacetone	.	67	.	.	.
Urea	2-Phenylpropionate	.	67	.	.	.
Urea	3-Hydroxybutyrate	.	67	.	.	.
Urea	3-Hydroxyphenylacetate	.	67	.	.	.
Urea	3-Phenylpropionate	.	67	.	.	.
Urea	4-Hydroxybutyrate	.	67	.	.	.
Urea	Acetate	.	67	.	.	.
Urea	Acetoacetate	.	67	.	.	.
Urea	Acetone	.	67	.	.	.
Urea	Adipate	.	67	.	.	.
Urea	Alanine	.	67	.	.	.
Urea	Allantoin	.	67	.	.	.
Urea	Aspartate	.	67	.	.	.
Urea	Benzoate	.	67	.	.	.
Urea	Butyrate	.	67	.	.	.
Urea	Cadaverine	.	67	.	.	.
Urea	Caffeine	.	67	.	.	.
Urea	Carnitine	.	67	.	.	.
Urea	Choline	.	67	.	.	.
Urea	Dimethylamine	.	67	.	.	.
Urea	Ethanol	.	67	.	.	.
Urea	Ferulate	.	67	.	.	.
Urea	Formate	.	67	.	.	.
Urea	Fumarate	.	67	.	.	.
Urea	Glucose	.	67	.	.	.
Urea	Glutamate	.	67	.	.	.
Urea	Glycerol	.	67	.	.	.
Urea	Glycine	.	67	.	.	.
Urea	Histidine	.	67	.	.	.
Urea	Hypoxanthine	.	67	.	.	.
Urea	Imidazole	.	67	.	.	.
Urea	Isobutyrate	.	67	.	.	.
Urea	Isoleucine	.	67	.	.	.
Urea	Isopropanol	.	67	.	.	.
Urea	Isovalerate	.	67	.	.	.
Urea	Lactate	.	67	.	.	.
Urea	Leucine	.	67	.	.	.
Urea	Lysine	.	67	.	.	.
Urea	Maltose	.	67	.	.	.
Urea	Methanol	.	67	.	.	.
Urea	Methylamine	.	67	.	.	.
Urea	Nicotinate	.	67	.	.	.
Urea	N-nitrosodimethylamine	.	67	.	.	.
Urea	N-Phenylacetylglycine	.	67	.	.	.
Urea	Ornithine	.	67	.	.	.
Urea	Phenylacetate	.	67	.	.	.
Urea	Phenylalanine	.	67	.	.	.
Urea	Pimelate	.	67	.	.	.
Urea	Proline	.	67	.	.	.
Urea	Propionate	.	67	.	.	.
Urea	Ribose	.	67	.	.	.
Urea	Serine	.	67	.	.	.
Urea	Succinate	.	67	.	.	.
Urea	Trimethylamine	.	67	.	.	.
Urea	Tyrosine	.	67	.	.	.
Urea	Uracil	.	67	.	.	.
Valerate	1,3-Dihydroxyacetone	0,5683	67	0,3799	0,7114	<,0001
Valerate	2-Phenylpropionate	0,7733	67	0,6547	0,8547	<,0001
Valerate	3-Hydroxybutyrate	0,7173	67	0,5764	0,8167	<,0001
Valerate	3-Hydroxyphenylacetate	0,7832	67	0,6688	0,8614	<,0001
Valerate	3-Phenylpropionate	0,6949	67	0,5457	0,8013	<,0001
Valerate	4-Hydroxybutyrate	0,8494	67	0,7654	0,9050	<,0001
Valerate	Acetate	0,6268	67	0,4551	0,7535	<,0001
Valerate	Acetoacetate	0,9706	67	0,9524	0,9819	<,0001
Valerate	Acetone	0,8903	67	0,8270	0,9314	<,0001
Valerate	Adipate	0,9330	67	0,8929	0,9584	<,0001
Valerate	Alanine	0,8604	67	0,7818	0,9121	<,0001
Valerate	Allantoin	0,1639	67	-0,0794	0,3888	0,1851
Valerate	Aspartate	0,8230	67	0,7264	0,8877	<,0001
Valerate	Benzoate	0,7024	67	0,5561	0,8066	<,0001
Valerate	Butyrate	0,9852	67	0,9760	0,9909	<,0001
Valerate	Cadaverine	0,7093	67	0,5654	0,8113	<,0001
Valerate	Caffeine	0,7067	67	0,5618	0,8095	<,0001
Valerate	Carnitine	0,9041	67	0,8481	0,9401	<,0001
Valerate	Choline	0,7849	67	0,6713	0,8625	<,0001
Valerate	Dimethylamine	-0,0153	67	-0,2546	0,2257	0,9022
Valerate	Ethanol	0,8126	67	0,7112	0,8809	<,0001
Valerate	Ferulate	0,7415	67	0,6100	0,8333	<,0001
Valerate	Formate	0,7253	67	0,5874	0,8222	<,0001
Valerate	Fumarate	0,5997	67	0,4199	0,7341	<,0001
Valerate	Glucose	0,8200	67	0,7220	0,8857	<,0001
Valerate	Glutamate	0,8357	67	0,7450	0,8960	<,0001
Valerate	Glycerol	0,7934	67	0,6834	0,8681	<,0001
Valerate	Glycine	0,7057	67	0,5604	0,8088	<,0001
Valerate	Histidine	0,6937	67	0,5442	0,8005	<,0001
Valerate	Hypoxanthine	0,7214	67	0,5820	0,8196	<,0001
Valerate	Imidazole	0,6760	67	0,5203	0,7882	<,0001
Valerate	Isobutyrate	0,8602	67	0,7814	0,9120	<,0001
Valerate	Isoleucine	0,8885	67	0,8241	0,9302	<,0001
Valerate	Isopropanol	0,7570	67	0,6316	0,8438	<,0001
Valerate	Isovalerate	0,6070	67	0,4294	0,7394	<,0001
Valerate	Lactate	0,8339	67	0,7424	0,8948	<,0001
Valerate	Leucine	0,8750	67	0,8037	0,9215	<,0001
Valerate	Lysine	0,8042	67	0,6991	0,8753	<,0001
Valerate	Maltose	0,7921	67	0,6816	0,8673	<,0001
Valerate	Methanol	0,6876	67	0,5359	0,7963	<,0001
Valerate	Methylamine	0,7569	67	0,6315	0,8437	<,0001
Valerate	Nicotinate	0,6892	67	0,5381	0,7974	<,0001
Valerate	N-nitrosodimethylamine	0,7901	67	0,6788	0,8660	<,0001
Valerate	N-Phenylacetylglycine	0,7874	67	0,6748	0,8641	<,0001
Valerate	Ornithine	0,8095	67	0,7067	0,8788	<,0001
Valerate	Phenylacetate	0,7447	67	0,6143	0,8354	<,0001
Valerate	Phenylalanine	0,7441	67	0,6136	0,8351	<,0001
Valerate	Pimelate	0,9822	67	0,9710	0,9890	<,0001
Valerate	Proline	0,7000	67	0,5527	0,8049	<,0001
Valerate	Propionate	0,9464	67	0,9140	0,9668	<,0001
Valerate	Ribose	0,7530	67	0,6261	0,8411	<,0001
Valerate	Serine	0,7478	67	0,6187	0,8375	<,0001
Valerate	Succinate	0,7542	67	0,6277	0,8419	<,0001
Valerate	Trimethylamine	-0,0246	67	-0,2632	0,2169	0,8436
Valerate	Tyrosine	0,7798	67	0,6640	0,8591	<,0001
Valerate	Uracil	0,6740	67	0,5176	0,7868	<,0001
Valerate	Urea	.	67	.	.	.
Valine	1,3-Dihydroxyacetone	0,7929	67	0,6827	0,8678	<,0001
Valine	2-Phenylpropionate	0,9412	67	0,9057	0,9635	<,0001
Valine	3-Hydroxybutyrate	0,9081	67	0,8542	0,9427	<,0001
Valine	3-Hydroxyphenylacetate	0,9533	67	0,9248	0,9711	<,0001
Valine	3-Phenylpropionate	0,9237	67	0,8783	0,9525	<,0001
Valine	4-Hydroxybutyrate	0,9726	67	0,9556	0,9831	<,0001
Valine	Acetate	0,2651	67	0,0266	0,4751	0,0302
Valine	Acetoacetate	0,9269	67	0,8834	0,9546	<,0001
Valine	Acetone	0,9705	67	0,9523	0,9818	<,0001
Valine	Adipate	0,9520	67	0,9229	0,9703	<,0001
Valine	Alanine	0,8815	67	0,8135	0,9257	<,0001
Valine	Allantoin	0,2031	67	-0,0391	0,4226	0,0994
Valine	Aspartate	0,9726	67	0,9556	0,9831	<,0001
Valine	Benzoate	0,9047	67	0,8489	0,9405	<,0001
Valine	Butyrate	0,8594	67	0,7802	0,9114	<,0001
Valine	Cadaverine	0,9059	67	0,8509	0,9413	<,0001
Valine	Caffeine	0,9373	67	0,8997	0,9611	<,0001
Valine	Carnitine	0,8907	67	0,8275	0,9316	<,0001
Valine	Choline	0,9492	67	0,9184	0,9686	<,0001
Valine	Dimethylamine	0,1645	67	-0,0788	0,3893	0,1834
Valine	Ethanol	0,9770	67	0,9627	0,9858	<,0001
Valine	Ferulate	0,9182	67	0,8698	0,9491	<,0001
Valine	Formate	0,9324	67	0,8919	0,9580	<,0001
Valine	Fumarate	0,7820	67	0,6671	0,8606	<,0001
Valine	Glucose	0,8997	67	0,8413	0,9373	<,0001
Valine	Glutamate	0,9471	67	0,9151	0,9673	<,0001
Valine	Glycerol	0,9697	67	0,9511	0,9813	<,0001
Valine	Glycine	0,2959	67	0,0600	0,5006	0,0150
Valine	Histidine	0,9135	67	0,8626	0,9461	<,0001
Valine	Hypoxanthine	0,9286	67	0,8860	0,9556	<,0001
Valine	Imidazole	0,8958	67	0,8353	0,9348	<,0001
Valine	Isobutyrate	0,6933	67	0,5436	0,8002	<,0001
Valine	Isoleucine	0,9239	67	0,8787	0,9527	<,0001
Valine	Isopropanol	0,9371	67	0,8994	0,9610	<,0001
Valine	Isovalerate	0,5889	67	0,4062	0,7264	<,0001
Valine	Lactate	0,9305	67	0,8890	0,9568	<,0001
Valine	Leucine	0,8474	67	0,7624	0,9037	<,0001
Valine	Lysine	0,9588	67	0,9335	0,9745	<,0001
Valine	Maltose	0,8188	67	0,7203	0,8850	<,0001
Valine	Methanol	0,9240	67	0,8788	0,9527	<,0001
Valine	Methylamine	0,8391	67	0,7501	0,8983	<,0001
Valine	Nicotinate	0,9081	67	0,8543	0,9427	<,0001
Valine	N-nitrosodimethylamine	0,9419	67	0,9069	0,9640	<,0001
Valine	N-Phenylacetylglycine	0,9638	67	0,9416	0,9777	<,0001
Valine	Ornithine	0,9120	67	0,8602	0,9451	<,0001
Valine	Phenylacetate	0,8973	67	0,8376	0,9358	<,0001
Valine	Phenylalanine	0,9212	67	0,8745	0,9510	<,0001
Valine	Pimelate	0,8937	67	0,8321	0,9335	<,0001
Valine	Proline	0,9309	67	0,8896	0,9571	<,0001
Valine	Propionate	0,7188	67	0,5785	0,8178	<,0001
Valine	Ribose	0,9302	67	0,8886	0,9567	<,0001
Valine	Serine	0,9428	67	0,9082	0,9645	<,0001
Valine	Succinate	0,9531	67	0,9246	0,9710	<,0001
Valine	Trimethylamine	0,1170	67	-0,1268	0,3474	0,3458
Valine	Tyrosine	0,9336	67	0,8938	0,9588	<,0001
Valine	Uracil	0,8601	67	0,7814	0,9119	<,0001
Valine	Urea	.	67	.	.	.
Valine	Valerate	0,8557	67	0,7747	0,9091	<,0001
Xanthine	1,3-Dihydroxyacetone	0,7111	67	0,5679	0,8125	<,0001
Xanthine	2-Phenylpropionate	0,9125	67	0,8610	0,9455	<,0001
Xanthine	3-Hydroxybutyrate	0,8487	67	0,7643	0,9045	<,0001
Xanthine	3-Hydroxyphenylacetate	0,9415	67	0,9063	0,9638	<,0001
Xanthine	3-Phenylpropionate	0,9729	67	0,9562	0,9833	<,0001
Xanthine	4-Hydroxybutyrate	0,8774	67	0,8074	0,9231	<,0001
Xanthine	Acetate	0,1095	67	-0,1342	0,3408	0,3776
Xanthine	Acetoacetate	0,8211	67	0,7237	0,8865	<,0001
Xanthine	Acetone	0,9173	67	0,8684	0,9485	<,0001
Xanthine	Adipate	0,9001	67	0,8420	0,9376	<,0001
Xanthine	Alanine	0,7709	67	0,6512	0,8531	<,0001
Xanthine	Allantoin	0,3104	67	0,0758	0,5124	0,0106
Xanthine	Aspartate	0,9003	67	0,8422	0,9377	<,0001
Xanthine	Benzoate	0,9981	67	0,9969	0,9988	<,0001
Xanthine	Butyrate	0,7502	67	0,6221	0,8392	<,0001
Xanthine	Cadaverine	0,8807	67	0,8123	0,9252	<,0001
Xanthine	Caffeine	0,9406	67	0,9048	0,9632	<,0001
Xanthine	Carnitine	0,7462	67	0,6165	0,8365	<,0001
Xanthine	Choline	0,8925	67	0,8303	0,9328	<,0001
Xanthine	Dimethylamine	0,1705	67	-0,0727	0,3945	0,1678
Xanthine	Ethanol	0,9034	67	0,8470	0,9397	<,0001
Xanthine	Ferulate	0,8818	67	0,8140	0,9259	<,0001
Xanthine	Formate	0,9821	67	0,9710	0,9890	<,0001
Xanthine	Fumarate	0,8792	67	0,8101	0,9243	<,0001
Xanthine	Glucose	0,8930	67	0,8310	0,9331	<,0001
Xanthine	Glutamate	0,9085	67	0,8548	0,9429	<,0001
Xanthine	Glycerol	0,9134	67	0,8624	0,9460	<,0001
Xanthine	Glycine	0,1203	67	-0,1235	0,3504	0,3323
Xanthine	Histidine	0,9960	67	0,9934	0,9975	<,0001
Xanthine	Hypoxanthine	0,9916	67	0,9862	0,9948	<,0001
Xanthine	Imidazole	0,9956	67	0,9928	0,9973	<,0001
Xanthine	Isobutyrate	0,5612	67	0,3710	0,7062	<,0001
Xanthine	Isoleucine	0,7760	67	0,6586	0,8566	<,0001
Xanthine	Isopropanol	0,9295	67	0,8874	0,9562	<,0001
Xanthine	Isovalerate	0,4832	67	0,2749	0,6482	<,0001
Xanthine	Lactate	0,8461	67	0,7604	0,9028	<,0001
Xanthine	Leucine	0,6794	67	0,5248	0,7906	<,0001
Xanthine	Lysine	0,9024	67	0,8454	0,9390	<,0001
Xanthine	Maltose	0,8323	67	0,7400	0,8938	<,0001
Xanthine	Methanol	0,9250	67	0,8804	0,9534	<,0001
Xanthine	Methylamine	0,7760	67	0,6585	0,8565	<,0001
Xanthine	Nicotinate	0,9935	67	0,9895	0,9960	<,0001
Xanthine	N-nitrosodimethylamine	0,8566	67	0,7760	0,9096	<,0001
Xanthine	N-Phenylacetylglycine	0,9027	67	0,8460	0,9393	<,0001
Xanthine	Ornithine	0,8809	67	0,8127	0,9253	<,0001
Xanthine	Phenylacetate	0,8679	67	0,7930	0,9169	<,0001
Xanthine	Phenylalanine	0,9836	67	0,9733	0,9899	<,0001
Xanthine	Pimelate	0,7968	67	0,6883	0,8704	<,0001
Xanthine	Proline	0,9427	67	0,9081	0,9645	<,0001
Xanthine	Propionate	0,5556	67	0,3640	0,7021	<,0001
Xanthine	Ribose	0,9417	67	0,9066	0,9639	<,0001
Xanthine	Serine	0,8746	67	0,8031	0,9213	<,0001
Xanthine	Succinate	0,9347	67	0,8956	0,9595	<,0001
Xanthine	Trimethylamine	0,0923	67	-0,1512	0,3253	0,4574
Xanthine	Tyrosine	0,9858	67	0,9769	0,9913	<,0001
Xanthine	Uracil	0,9611	67	0,9373	0,9760	<,0001
Xanthine	Urea	.	67	.	.	.
Xanthine	Valerate	0,7298	67	0,5936	0,8253	<,0001
Xanthine	Valine	0,9191	67	0,8712	0,9497	<,0001

## Sheet: Summary
Supplementary Data 5
Summary
	Sample number
RUM	71
DUO	67
In total 60 metabolites
