# Supplementary material for: Cow’s microbiome from antepartum to postpartum: A long-term study covering two physiological challenges
Source: Front Microbiol. 2022 Nov 16;13:1000750. doi: 10.3389/fmicb.2022.1000750 (PMC9709127; doi:10.3389/fmicb.2022.1000750)
Supplement: Supplementary file 6 [file Table_6.XLSX]

## Sheet: Combination table (p≤0.0500)
Supplementary Data 6
In this table the multiple correlation output of genera and metabolites in RUM and DUO is listed, whereby only significant ones are considered (p<0.05).
Each combination case was listed and counted across all time points. The more frequent the combination is significantly correlating the more meaningful it may be to the rumen ecosystem.								Statistics
Metabolite (Variable1)	Genus (Variable2)	Variable1	Variable2	Combination	COUNT_Combination	COUNT_Repeats of this metabolite	COUNT_Repeats of this genus	Correlation	Sample Count	Lower 95%	Upper 95%	Signif Prob	Matrix	Time point
Formate	Uncl. Succinivibrionaceae	Metabolite	Bacteria	FormateUncl. Succinivibrionaceae	4	178	216	0,9997	6	0,9967	10000	<,0001	DUO	-42
Formate	Uncl. Succinivibrionaceae	Metabolite	Bacteria	FormateUncl. Succinivibrionaceae	4	178	216	0,9842	7	0,8930	0,9978	<,0001	DUO	12hL
Formate	Uncl. Succinivibrionaceae	Metabolite	Bacteria	FormateUncl. Succinivibrionaceae	4	178	216	0,9887	4	0,5546	0,9998	0,0113	DUO	+118
Formate	Uncl. Succinivibrionaceae	Metabolite	Bacteria	FormateUncl. Succinivibrionaceae	4	178	216	0,7698	7	0,0398	0,9640	0,0429	RUM	-42
Choline	Uncl. Succinivibrionaceae	Metabolite	Bacteria	CholineUncl. Succinivibrionaceae	4	173	216	0,9998	6	0,9984	10000	<,0001	DUO	-42
Choline	Uncl. Succinivibrionaceae	Metabolite	Bacteria	CholineUncl. Succinivibrionaceae	4	173	216	0,9623	7	0,7602	0,9946	0,0005	DUO	12hL
Choline	Uncl. Succinivibrionaceae	Metabolite	Bacteria	CholineUncl. Succinivibrionaceae	4	173	216	0,9742	5	0,6543	0,9984	0,0050	RUM	+14
Choline	Uncl. Succinivibrionaceae	Metabolite	Bacteria	CholineUncl. Succinivibrionaceae	4	173	216	0,9940	4	0,7365	0,9999	0,0060	DUO	+118
Fumarate	Uncl. Succinivibrionaceae	Metabolite	Bacteria	FumarateUncl. Succinivibrionaceae	4	166	216	10000	4	0,9996	10000	<,0001	DUO	72hL
Fumarate	Uncl. Succinivibrionaceae	Metabolite	Bacteria	FumarateUncl. Succinivibrionaceae	4	166	216	0,9873	6	0,8845	0,9987	0,0002	DUO	-42
Fumarate	Uncl. Succinivibrionaceae	Metabolite	Bacteria	FumarateUncl. Succinivibrionaceae	4	166	216	0,9605	7	0,7499	0,9943	0,0006	DUO	12hL
Fumarate	Uncl. Succinivibrionaceae	Metabolite	Bacteria	FumarateUncl. Succinivibrionaceae	4	166	216	0,8694	6	0,1965	0,9856	0,0245	RUM	72hC
Proline	Uncl. Succinivibrionaceae	Metabolite	Bacteria	ProlineUncl. Succinivibrionaceae	6	165	216	10000	6	0,9999	10000	<,0001	DUO	-42
Proline	Uncl. Succinivibrionaceae	Metabolite	Bacteria	ProlineUncl. Succinivibrionaceae	6	165	216	0,9924	7	0,9474	0,9989	<,0001	DUO	24hC
Proline	Uncl. Succinivibrionaceae	Metabolite	Bacteria	ProlineUncl. Succinivibrionaceae	6	165	216	0,9845	7	0,8951	0,9978	<,0001	DUO	12hL
Proline	Uncl. Succinivibrionaceae	Metabolite	Bacteria	ProlineUncl. Succinivibrionaceae	6	165	216	0,9996	4	0,9808	10000	0,0004	DUO	+118
Proline	Uncl. Succinivibrionaceae	Metabolite	Bacteria	ProlineUncl. Succinivibrionaceae	6	165	216	0,9498	5	0,4170	0,9968	0,0134	RUM	+14
Proline	Uncl. Succinivibrionaceae	Metabolite	Bacteria	ProlineUncl. Succinivibrionaceae	6	165	216	0,8893	6	0,2793	0,9879	0,0177	RUM	+118
Aspartate	Uncl. Succinivibrionaceae	Metabolite	Bacteria	AspartateUncl. Succinivibrionaceae	7	159	216	0,9996	6	0,9963	10000	<,0001	DUO	-42
Aspartate	Uncl. Succinivibrionaceae	Metabolite	Bacteria	AspartateUncl. Succinivibrionaceae	7	159	216	0,9865	7	0,9078	0,9981	<,0001	DUO	12hL
Aspartate	Uncl. Succinivibrionaceae	Metabolite	Bacteria	AspartateUncl. Succinivibrionaceae	7	159	216	0,9943	4	0,7490	0,9999	0,0057	DUO	+118
Aspartate	Uncl. Succinivibrionaceae	Metabolite	Bacteria	AspartateUncl. Succinivibrionaceae	7	159	216	0,9696	5	0,6046	0,9981	0,0063	RUM	+14
Aspartate	Uncl. Succinivibrionaceae	Metabolite	Bacteria	AspartateUncl. Succinivibrionaceae	7	159	216	0,9579	5	0,4887	0,9973	0,0103	RUM	24hL
Aspartate	Uncl. Succinivibrionaceae	Metabolite	Bacteria	AspartateUncl. Succinivibrionaceae	7	159	216	0,8839	6	0,2560	0,9873	0,0194	RUM	72hL
Aspartate	Uncl. Succinivibrionaceae	Metabolite	Bacteria	AspartateUncl. Succinivibrionaceae	7	159	216	0,8566	6	0,1477	0,9841	0,0294	RUM	+118
Ribose	Uncl. Succinivibrionaceae	Metabolite	Bacteria	RiboseUncl. Succinivibrionaceae	7	158	216	0,9998	6	0,9979	10000	<,0001	DUO	-42
Ribose	Uncl. Succinivibrionaceae	Metabolite	Bacteria	RiboseUncl. Succinivibrionaceae	7	158	216	0,9856	7	0,9023	0,9980	<,0001	DUO	12hL
Ribose	Uncl. Succinivibrionaceae	Metabolite	Bacteria	RiboseUncl. Succinivibrionaceae	7	158	216	0,9891	5	0,8383	0,9993	0,0014	RUM	24hL
Ribose	Uncl. Succinivibrionaceae	Metabolite	Bacteria	RiboseUncl. Succinivibrionaceae	7	158	216	0,9842	5	0,7746	0,9990	0,0024	RUM	+14
Ribose	Uncl. Succinivibrionaceae	Metabolite	Bacteria	RiboseUncl. Succinivibrionaceae	7	158	216	0,9807	5	0,7310	0,9988	0,0032	DUO	12hC
Ribose	Uncl. Succinivibrionaceae	Metabolite	Bacteria	RiboseUncl. Succinivibrionaceae	7	158	216	0,9953	4	0,7893	0,9999	0,0047	DUO	+118
Ribose	Uncl. Succinivibrionaceae	Metabolite	Bacteria	RiboseUncl. Succinivibrionaceae	7	158	216	0,7992	7	0,1159	0,9690	0,0310	DUO	24hC
1,3-Dihydroxyacetone	Uncl. Succinivibrionaceae	Metabolite	Bacteria	1,3-DihydroxyacetoneUncl. Succinivibrionaceae	6	154	216	0,9999	6	0,9995	10000	<,0001	DUO	-42
Isopropanol	Uncl. Succinivibrionaceae	Metabolite	Bacteria	IsopropanolUncl. Succinivibrionaceae	4	154	216	0,9990	6	0,9906	0,9999	<,0001	DUO	-42
Isopropanol	Uncl. Succinivibrionaceae	Metabolite	Bacteria	IsopropanolUncl. Succinivibrionaceae	4	154	216	0,9913	7	0,9399	0,9988	<,0001	DUO	12hL
1,3-Dihydroxyacetone	Uncl. Succinivibrionaceae	Metabolite	Bacteria	1,3-DihydroxyacetoneUncl. Succinivibrionaceae	6	154	216	0,9753	7	0,8368	0,9965	0,0002	DUO	12hL
1,3-Dihydroxyacetone	Uncl. Succinivibrionaceae	Metabolite	Bacteria	1,3-DihydroxyacetoneUncl. Succinivibrionaceae	6	154	216	0,8888	7	0,4104	0,9835	0,0075	DUO	24hC
Isopropanol	Uncl. Succinivibrionaceae	Metabolite	Bacteria	IsopropanolUncl. Succinivibrionaceae	4	154	216	0,9851	4	0,4498	0,9997	0,0149	DUO	+118
1,3-Dihydroxyacetone	Uncl. Succinivibrionaceae	Metabolite	Bacteria	1,3-DihydroxyacetoneUncl. Succinivibrionaceae	6	154	216	0,8785	6	0,2331	0,9866	0,0213	RUM	+118
Isopropanol	Uncl. Succinivibrionaceae	Metabolite	Bacteria	IsopropanolUncl. Succinivibrionaceae	4	154	216	0,9313	5	0,2752	0,9956	0,0214	RUM	24hL
1,3-Dihydroxyacetone	Uncl. Succinivibrionaceae	Metabolite	Bacteria	1,3-DihydroxyacetoneUncl. Succinivibrionaceae	6	154	216	-0,8169	7	-0,9720	-0,1658	0,0249	DUO	+100
1,3-Dihydroxyacetone	Uncl. Succinivibrionaceae	Metabolite	Bacteria	1,3-DihydroxyacetoneUncl. Succinivibrionaceae	6	154	216	0,9198	5	0,1992	0,9948	0,0269	DUO	12hC
Lactate	Uncl. Succinivibrionaceae	Metabolite	Bacteria	LactateUncl. Succinivibrionaceae	5	153	216	0,9980	6	0,9807	0,9998	<,0001	DUO	-42
Lactate	Uncl. Succinivibrionaceae	Metabolite	Bacteria	LactateUncl. Succinivibrionaceae	5	153	216	0,9990	5	0,9843	0,9999	<,0001	RUM	+14
Lactate	Uncl. Succinivibrionaceae	Metabolite	Bacteria	LactateUncl. Succinivibrionaceae	5	153	216	0,9880	7	0,9176	0,9983	<,0001	DUO	12hL
Lactate	Uncl. Succinivibrionaceae	Metabolite	Bacteria	LactateUncl. Succinivibrionaceae	5	153	216	0,9949	5	0,9216	0,9997	0,0004	RUM	24hL
Lactate	Uncl. Succinivibrionaceae	Metabolite	Bacteria	LactateUncl. Succinivibrionaceae	5	153	216	0,9680	6	0,7293	0,9966	0,0015	RUM	72hL
Serine	Uncl. Succinivibrionaceae	Metabolite	Bacteria	SerineUncl. Succinivibrionaceae	6	152	216	10000	6	0,9998	10000	<,0001	DUO	-42
Serine	Uncl. Succinivibrionaceae	Metabolite	Bacteria	SerineUncl. Succinivibrionaceae	6	152	216	0,9834	7	0,8879	0,9976	<,0001	DUO	12hL
Serine	Uncl. Succinivibrionaceae	Metabolite	Bacteria	SerineUncl. Succinivibrionaceae	6	152	216	0,9964	4	0,8354	0,9999	0,0036	DUO	+118
Serine	Uncl. Succinivibrionaceae	Metabolite	Bacteria	SerineUncl. Succinivibrionaceae	6	152	216	-0,8619	7	-0,9793	-0,3101	0,0126	DUO	+100
Serine	Uncl. Succinivibrionaceae	Metabolite	Bacteria	SerineUncl. Succinivibrionaceae	6	152	216	0,8889	6	0,2774	0,9878	0,0178	RUM	+118
Serine	Uncl. Succinivibrionaceae	Metabolite	Bacteria	SerineUncl. Succinivibrionaceae	6	152	216	0,8516	6	0,1297	0,9835	0,0314	RUM	72hC
Cadaverine	Uncl. Succinivibrionaceae	Metabolite	Bacteria	CadaverineUncl. Succinivibrionaceae	4	143	216	0,9950	6	0,9533	0,9995	<,0001	DUO	-42
Uracil	Uncl. Succinivibrionaceae	Metabolite	Bacteria	UracilUncl. Succinivibrionaceae	4	143	216	0,9959	6	0,9608	0,9996	<,0001	DUO	-42
Cadaverine	Uncl. Succinivibrionaceae	Metabolite	Bacteria	CadaverineUncl. Succinivibrionaceae	4	143	216	0,9817	7	0,8768	0,9974	<,0001	DUO	12hL
Uracil	Uncl. Succinivibrionaceae	Metabolite	Bacteria	UracilUncl. Succinivibrionaceae	4	143	216	0,9806	7	0,8699	0,9972	<,0001	DUO	12hL
Cadaverine	Uncl. Succinivibrionaceae	Metabolite	Bacteria	CadaverineUncl. Succinivibrionaceae	4	143	216	0,9984	5	0,9746	0,9999	<,0001	RUM	24hL
Cadaverine	Uncl. Succinivibrionaceae	Metabolite	Bacteria	CadaverineUncl. Succinivibrionaceae	4	143	216	0,9456	6	0,5761	0,9942	0,0044	RUM	72hL
Uracil	Uncl. Succinivibrionaceae	Metabolite	Bacteria	UracilUncl. Succinivibrionaceae	4	143	216	0,9849	4	0,4452	0,9997	0,0151	DUO	72hL
Uracil	Uncl. Succinivibrionaceae	Metabolite	Bacteria	UracilUncl. Succinivibrionaceae	4	143	216	0,9613	4	0,0028	0,9992	0,0387	DUO	+118
Lysine	Uncl. Succinivibrionaceae	Metabolite	Bacteria	LysineUncl. Succinivibrionaceae	5	140	216	0,9979	6	0,9804	0,9998	<,0001	DUO	-42
Succinate	Uncl. Succinivibrionaceae	Metabolite	Bacteria	SuccinateUncl. Succinivibrionaceae	6	140	216	0,9997	6	0,9975	10000	<,0001	DUO	-42
Succinate	Uncl. Succinivibrionaceae	Metabolite	Bacteria	SuccinateUncl. Succinivibrionaceae	6	140	216	0,9999	5	0,9977	10000	<,0001	RUM	+14
Lysine	Uncl. Succinivibrionaceae	Metabolite	Bacteria	LysineUncl. Succinivibrionaceae	5	140	216	0,9947	7	0,9628	0,9992	<,0001	DUO	12hL
Succinate	Uncl. Succinivibrionaceae	Metabolite	Bacteria	SuccinateUncl. Succinivibrionaceae	6	140	216	0,9936	7	0,9554	0,9991	<,0001	DUO	12hL
Lysine	Uncl. Succinivibrionaceae	Metabolite	Bacteria	LysineUncl. Succinivibrionaceae	5	140	216	0,9923	5	0,8842	0,9995	0,0008	RUM	24hL
Succinate	Uncl. Succinivibrionaceae	Metabolite	Bacteria	SuccinateUncl. Succinivibrionaceae	6	140	216	0,9797	5	0,7187	0,9987	0,0035	DUO	12hC
Lysine	Uncl. Succinivibrionaceae	Metabolite	Bacteria	LysineUncl. Succinivibrionaceae	5	140	216	0,9369	6	0,5228	0,9932	0,0059	RUM	72hL
Succinate	Uncl. Succinivibrionaceae	Metabolite	Bacteria	SuccinateUncl. Succinivibrionaceae	6	140	216	0,9932	4	0,7056	0,9999	0,0068	DUO	+118
Allantoin	Uncl. Succinivibrionaceae	Metabolite	Bacteria	AllantoinUncl. Succinivibrionaceae	3	140	216	0,8583	7	0,2976	0,9787	0,0134	DUO	12hL
Succinate	Uncl. Succinivibrionaceae	Metabolite	Bacteria	SuccinateUncl. Succinivibrionaceae	6	140	216	-0,8356	7	-0,9751	-0,2226	0,0192	DUO	+100
Lysine	Uncl. Succinivibrionaceae	Metabolite	Bacteria	LysineUncl. Succinivibrionaceae	5	140	216	0,9754	4	0,2292	0,9995	0,0246	DUO	+118
Allantoin	Uncl. Succinivibrionaceae	Metabolite	Bacteria	AllantoinUncl. Succinivibrionaceae	3	140	216	0,8678	6	0,1900	0,9854	0,0251	RUM	72hC
Allantoin	Uncl. Succinivibrionaceae	Metabolite	Bacteria	AllantoinUncl. Succinivibrionaceae	3	140	216	0,8959	5	0,0650	0,9932	0,0397	DUO	12hC
4-Hydroxybutyrate	Uncl. Succinivibrionaceae	Metabolite	Bacteria	4-HydroxybutyrateUncl. Succinivibrionaceae	5	139	216	0,9999	6	0,9995	10000	<,0001	DUO	-42
4-Hydroxybutyrate	Uncl. Succinivibrionaceae	Metabolite	Bacteria	4-HydroxybutyrateUncl. Succinivibrionaceae	5	139	216	0,9872	7	0,9125	0,9982	<,0001	DUO	12hL
4-Hydroxybutyrate	Uncl. Succinivibrionaceae	Metabolite	Bacteria	4-HydroxybutyrateUncl. Succinivibrionaceae	5	139	216	0,9091	6	0,3718	0,9901	0,0120	RUM	72hL
4-Hydroxybutyrate	Uncl. Succinivibrionaceae	Metabolite	Bacteria	4-HydroxybutyrateUncl. Succinivibrionaceae	5	139	216	0,9742	4	0,2057	0,9995	0,0258	DUO	+118
Trimethylamine	Uncl. Succinivibrionaceae	Metabolite	Bacteria	TrimethylamineUncl. Succinivibrionaceae	1	139	216	0,8884	5	0,0284	0,9926	0,0440	RUM	24hL
4-Hydroxybutyrate	Uncl. Succinivibrionaceae	Metabolite	Bacteria	4-HydroxybutyrateUncl. Succinivibrionaceae	5	139	216	0,7580	7	0,0116	0,9620	0,0483	DUO	24hC
Pimelate	Uncl. Succinivibrionaceae	Metabolite	Bacteria	PimelateUncl. Succinivibrionaceae	3	137	216	0,9939	6	0,9432	0,9994	<,0001	DUO	-42
Pimelate	Uncl. Succinivibrionaceae	Metabolite	Bacteria	PimelateUncl. Succinivibrionaceae	3	137	216	0,9904	7	0,9341	0,9986	<,0001	DUO	12hL
Pimelate	Uncl. Succinivibrionaceae	Metabolite	Bacteria	PimelateUncl. Succinivibrionaceae	3	137	216	0,9862	4	0,4823	0,9997	0,0138	DUO	72hL
N-nitrosodimethylamine	Uncl. Succinivibrionaceae	Metabolite	Bacteria	N-nitrosodimethylamineUncl. Succinivibrionaceae	4	136	216	0,9990	6	0,9906	0,9999	<,0001	DUO	-42
N-nitrosodimethylamine	Uncl. Succinivibrionaceae	Metabolite	Bacteria	N-nitrosodimethylamineUncl. Succinivibrionaceae	4	136	216	0,9796	7	0,8637	0,9971	0,0001	DUO	12hL
N-nitrosodimethylamine	Uncl. Succinivibrionaceae	Metabolite	Bacteria	N-nitrosodimethylamineUncl. Succinivibrionaceae	4	136	216	0,9985	4	0,9278	10000	0,0015	DUO	+118
N-nitrosodimethylamine	Uncl. Succinivibrionaceae	Metabolite	Bacteria	N-nitrosodimethylamineUncl. Succinivibrionaceae	4	136	216	0,9179	6	0,4167	0,9911	0,0098	RUM	72hC
Phenylacetate	Uncl. Succinivibrionaceae	Metabolite	Bacteria	PhenylacetateUncl. Succinivibrionaceae	3	134	216	0,9938	6	0,9416	0,9993	<,0001	DUO	-42
Phenylacetate	Uncl. Succinivibrionaceae	Metabolite	Bacteria	PhenylacetateUncl. Succinivibrionaceae	3	134	216	0,9874	7	0,9137	0,9982	<,0001	DUO	12hL
Phenylacetate	Uncl. Succinivibrionaceae	Metabolite	Bacteria	PhenylacetateUncl. Succinivibrionaceae	3	134	216	0,9167	6	0,4107	0,9910	0,0101	RUM	72hL
Caffeine	Uncl. Succinivibrionaceae	Metabolite	Bacteria	CaffeineUncl. Succinivibrionaceae	5	133	216	10000	6	0,9999	10000	<,0001	DUO	-42
Hypoxanthine	Uncl. Succinivibrionaceae	Metabolite	Bacteria	HypoxanthineUncl. Succinivibrionaceae	3	133	216	0,9999	6	0,9995	10000	<,0001	DUO	-42
Valerate	Uncl. Succinivibrionaceae	Metabolite	Bacteria	ValerateUncl. Succinivibrionaceae	2	133	216	0,9930	6	0,9345	0,9993	<,0001	DUO	-42
Caffeine	Uncl. Succinivibrionaceae	Metabolite	Bacteria	CaffeineUncl. Succinivibrionaceae	5	133	216	0,9872	7	0,9124	0,9982	<,0001	DUO	12hL
Hypoxanthine	Uncl. Succinivibrionaceae	Metabolite	Bacteria	HypoxanthineUncl. Succinivibrionaceae	3	133	216	0,9870	7	0,9111	0,9982	<,0001	DUO	12hL
Valerate	Uncl. Succinivibrionaceae	Metabolite	Bacteria	ValerateUncl. Succinivibrionaceae	2	133	216	0,9918	7	0,9432	0,9988	<,0001	DUO	12hL
Caffeine	Uncl. Succinivibrionaceae	Metabolite	Bacteria	CaffeineUncl. Succinivibrionaceae	5	133	216	0,9993	4	0,9671	10000	0,0007	DUO	+118
Caffeine	Uncl. Succinivibrionaceae	Metabolite	Bacteria	CaffeineUncl. Succinivibrionaceae	5	133	216	0,9545	6	0,6344	0,9952	0,0031	RUM	24hC
Hypoxanthine	Uncl. Succinivibrionaceae	Metabolite	Bacteria	HypoxanthineUncl. Succinivibrionaceae	3	133	216	0,9909	4	0,6248	0,9998	0,0091	DUO	+118
Caffeine	Uncl. Succinivibrionaceae	Metabolite	Bacteria	CaffeineUncl. Succinivibrionaceae	5	133	216	0,7935	7	0,1006	0,9681	0,0332	RUM	-42
Acetone	Uncl. Succinivibrionaceae	Metabolite	Bacteria	AcetoneUncl. Succinivibrionaceae	2	132	216	0,9975	6	0,9764	0,9997	<,0001	DUO	-42
Acetone	Uncl. Succinivibrionaceae	Metabolite	Bacteria	AcetoneUncl. Succinivibrionaceae	2	132	216	0,9777	7	0,8517	0,9968	0,0001	DUO	12hL
Benzoate	Uncl. Succinivibrionaceae	Metabolite	Bacteria	BenzoateUncl. Succinivibrionaceae	2	131	216	0,9996	6	0,9958	10000	<,0001	DUO	-42
Valine	Uncl. Succinivibrionaceae	Metabolite	Bacteria	ValineUncl. Succinivibrionaceae	4	131	216	0,9997	6	0,9972	10000	<,0001	DUO	-42
Valine	Uncl. Succinivibrionaceae	Metabolite	Bacteria	ValineUncl. Succinivibrionaceae	4	131	216	0,9951	7	0,9655	0,9993	<,0001	DUO	12hL
Benzoate	Uncl. Succinivibrionaceae	Metabolite	Bacteria	BenzoateUncl. Succinivibrionaceae	2	131	216	0,9798	7	0,8648	0,9971	0,0001	DUO	12hL
Valine	Uncl. Succinivibrionaceae	Metabolite	Bacteria	ValineUncl. Succinivibrionaceae	4	131	216	0,9045	6	0,3495	0,9896	0,0132	RUM	72hL
Valine	Uncl. Succinivibrionaceae	Metabolite	Bacteria	ValineUncl. Succinivibrionaceae	4	131	216	0,9153	5	0,1719	0,9945	0,0292	RUM	24hL
Alanine	Uncl. Succinivibrionaceae	Metabolite	Bacteria	AlanineUncl. Succinivibrionaceae	4	130	216	0,9947	6	0,9497	0,9994	<,0001	DUO	-42
Carnitine	Uncl. Succinivibrionaceae	Metabolite	Bacteria	CarnitineUncl. Succinivibrionaceae	2	130	216	10000	6	0,9997	10000	<,0001	DUO	-42
Glycerol	Uncl. Succinivibrionaceae	Metabolite	Bacteria	GlycerolUncl. Succinivibrionaceae	4	130	216	10000	6	0,9999	10000	<,0001	DUO	-42
Imidazole	Uncl. Succinivibrionaceae	Metabolite	Bacteria	ImidazoleUncl. Succinivibrionaceae	5	130	216	0,9999	6	0,9992	10000	<,0001	DUO	-42
Leucine	Uncl. Succinivibrionaceae	Metabolite	Bacteria	LeucineUncl. Succinivibrionaceae	3	130	216	0,9949	6	0,9518	0,9995	<,0001	DUO	-42
Glycerol	Uncl. Succinivibrionaceae	Metabolite	Bacteria	GlycerolUncl. Succinivibrionaceae	4	130	216	0,9826	7	0,8826	0,9975	<,0001	DUO	12hL
Imidazole	Uncl. Succinivibrionaceae	Metabolite	Bacteria	ImidazoleUncl. Succinivibrionaceae	5	130	216	0,9815	7	0,8754	0,9974	<,0001	DUO	12hL
Alanine	Uncl. Succinivibrionaceae	Metabolite	Bacteria	AlanineUncl. Succinivibrionaceae	4	130	216	0,9765	7	0,8441	0,9967	0,0002	DUO	12hL
Carnitine	Uncl. Succinivibrionaceae	Metabolite	Bacteria	CarnitineUncl. Succinivibrionaceae	2	130	216	0,9688	7	0,7975	0,9955	0,0003	DUO	12hL
Leucine	Uncl. Succinivibrionaceae	Metabolite	Bacteria	LeucineUncl. Succinivibrionaceae	3	130	216	0,9640	7	0,7696	0,9948	0,0005	DUO	12hL
Alanine	Uncl. Succinivibrionaceae	Metabolite	Bacteria	AlanineUncl. Succinivibrionaceae	4	130	216	0,9748	6	0,7813	0,9973	0,0009	RUM	72hL
Imidazole	Uncl. Succinivibrionaceae	Metabolite	Bacteria	ImidazoleUncl. Succinivibrionaceae	5	130	216	0,9972	4	0,8689	0,9999	0,0028	DUO	+118
Glycerol	Uncl. Succinivibrionaceae	Metabolite	Bacteria	GlycerolUncl. Succinivibrionaceae	4	130	216	0,9965	4	0,8386	0,9999	0,0035	DUO	+118
Glycerol	Uncl. Succinivibrionaceae	Metabolite	Bacteria	GlycerolUncl. Succinivibrionaceae	4	130	216	0,9399	6	0,5411	0,9936	0,0053	RUM	72hL
Leucine	Uncl. Succinivibrionaceae	Metabolite	Bacteria	LeucineUncl. Succinivibrionaceae	3	130	216	0,9714	5	0,6234	0,9982	0,0058	RUM	24hL
Alanine	Uncl. Succinivibrionaceae	Metabolite	Bacteria	AlanineUncl. Succinivibrionaceae	4	130	216	0,9623	5	0,5298	0,9976	0,0087	RUM	24hL
Imidazole	Uncl. Succinivibrionaceae	Metabolite	Bacteria	ImidazoleUncl. Succinivibrionaceae	5	130	216	0,9703	4	0,1371	0,9994	0,0297	DUO	72hL
Dimethylamine	Uncl. Succinivibrionaceae	Metabolite	Bacteria	DimethylamineUncl. Succinivibrionaceae	1	130	216	0,8022	7	0,1241	0,9695	0,0299	RUM	-42
Imidazole	Uncl. Succinivibrionaceae	Metabolite	Bacteria	ImidazoleUncl. Succinivibrionaceae	5	130	216	0,7674	7	0,0340	0,9636	0,0440	RUM	-42
Ethanol	Uncl. Succinivibrionaceae	Metabolite	Bacteria	EthanolUncl. Succinivibrionaceae	3	129	216	0,9998	6	0,9979	10000	<,0001	DUO	-42
Ethanol	Uncl. Succinivibrionaceae	Metabolite	Bacteria	EthanolUncl. Succinivibrionaceae	3	129	216	0,9839	7	0,8911	0,9977	<,0001	DUO	12hL
Ethanol	Uncl. Succinivibrionaceae	Metabolite	Bacteria	EthanolUncl. Succinivibrionaceae	3	129	216	0,9078	5	0,1284	0,9940	0,0331	RUM	24hL
2-Phenylpropionate	Uncl. Succinivibrionaceae	Metabolite	Bacteria	2-PhenylpropionateUncl. Succinivibrionaceae	4	127	216	0,9984	6	0,9843	0,9998	<,0001	DUO	-42
N-Phenylacetylglycine	Uncl. Succinivibrionaceae	Metabolite	Bacteria	N-PhenylacetylglycineUncl. Succinivibrionaceae	3	127	216	10000	6	0,9999	10000	<,0001	DUO	-42
2-Phenylpropionate	Uncl. Succinivibrionaceae	Metabolite	Bacteria	2-PhenylpropionateUncl. Succinivibrionaceae	4	127	216	0,9879	7	0,9169	0,9983	<,0001	DUO	12hL
N-Phenylacetylglycine	Uncl. Succinivibrionaceae	Metabolite	Bacteria	N-PhenylacetylglycineUncl. Succinivibrionaceae	3	127	216	0,9884	7	0,9205	0,9984	<,0001	DUO	12hL
Glycine	Uncl. Succinivibrionaceae	Metabolite	Bacteria	GlycineUncl. Succinivibrionaceae	2	127	216	0,9632	6	0,6946	0,9961	0,0020	RUM	72hL
N-Phenylacetylglycine	Uncl. Succinivibrionaceae	Metabolite	Bacteria	N-PhenylacetylglycineUncl. Succinivibrionaceae	3	127	216	0,9836	4	0,4115	0,9997	0,0164	DUO	+118
2-Phenylpropionate	Uncl. Succinivibrionaceae	Metabolite	Bacteria	2-PhenylpropionateUncl. Succinivibrionaceae	4	127	216	0,9791	4	0,3051	0,9996	0,0209	DUO	+118
2-Phenylpropionate	Uncl. Succinivibrionaceae	Metabolite	Bacteria	2-PhenylpropionateUncl. Succinivibrionaceae	4	127	216	-0,8244	7	-0,9732	-0,1881	0,0225	DUO	+100
Glycine	Uncl. Succinivibrionaceae	Metabolite	Bacteria	GlycineUncl. Succinivibrionaceae	2	127	216	0,8255	6	0,0421	0,9803	0,0430	DUO	-42
Butyrate	Uncl. Succinivibrionaceae	Metabolite	Bacteria	ButyrateUncl. Succinivibrionaceae	3	126	216	0,9970	6	0,9713	0,9997	<,0001	DUO	-42
Phenylalanine	Uncl. Succinivibrionaceae	Metabolite	Bacteria	PhenylalanineUncl. Succinivibrionaceae	3	126	216	0,9990	6	0,9902	0,9999	<,0001	DUO	-42
Butyrate	Uncl. Succinivibrionaceae	Metabolite	Bacteria	ButyrateUncl. Succinivibrionaceae	3	126	216	0,9901	7	0,9316	0,9986	<,0001	DUO	12hL
Phenylalanine	Uncl. Succinivibrionaceae	Metabolite	Bacteria	PhenylalanineUncl. Succinivibrionaceae	3	126	216	0,9820	7	0,8788	0,9974	<,0001	DUO	12hL
Butyrate	Uncl. Succinivibrionaceae	Metabolite	Bacteria	ButyrateUncl. Succinivibrionaceae	3	126	216	-0,9254	6	-0,9920	-0,4573	0,0081	RUM	+126
Phenylalanine	Uncl. Succinivibrionaceae	Metabolite	Bacteria	PhenylalanineUncl. Succinivibrionaceae	3	126	216	0,9681	4	0,1002	0,9994	0,0319	DUO	+118
Ferulate	Uncl. Succinivibrionaceae	Metabolite	Bacteria	FerulateUncl. Succinivibrionaceae	3	124	216	0,9928	6	0,9327	0,9992	<,0001	DUO	-42
Maltose	Uncl. Succinivibrionaceae	Metabolite	Bacteria	MaltoseUncl. Succinivibrionaceae	3	124	216	0,9950	6	0,9531	0,9995	<,0001	DUO	-42
Ferulate	Uncl. Succinivibrionaceae	Metabolite	Bacteria	FerulateUncl. Succinivibrionaceae	3	124	216	0,9892	7	0,9260	0,9985	<,0001	DUO	12hL
Maltose	Uncl. Succinivibrionaceae	Metabolite	Bacteria	MaltoseUncl. Succinivibrionaceae	3	124	216	0,9838	7	0,8906	0,9977	<,0001	DUO	12hL
Ferulate	Uncl. Succinivibrionaceae	Metabolite	Bacteria	FerulateUncl. Succinivibrionaceae	3	124	216	0,9999	4	0,9950	10000	<,0001	DUO	+118
Maltose	Uncl. Succinivibrionaceae	Metabolite	Bacteria	MaltoseUncl. Succinivibrionaceae	3	124	216	0,9615	6	0,6822	0,9959	0,0022	RUM	72hL
Nicotinate	Uncl. Succinivibrionaceae	Metabolite	Bacteria	NicotinateUncl. Succinivibrionaceae	3	123	216	10000	6	10000	10000	<,0001	DUO	-42
Nicotinate	Uncl. Succinivibrionaceae	Metabolite	Bacteria	NicotinateUncl. Succinivibrionaceae	3	123	216	0,9831	7	0,8860	0,9976	<,0001	DUO	12hL
Nicotinate	Uncl. Succinivibrionaceae	Metabolite	Bacteria	NicotinateUncl. Succinivibrionaceae	3	123	216	0,9958	4	0,8100	0,9999	0,0042	DUO	+118
3-Phenylpropionate	Uncl. Succinivibrionaceae	Metabolite	Bacteria	3-PhenylpropionateUncl. Succinivibrionaceae	5	121	216	0,9996	6	0,9957	10000	<,0001	DUO	-42
3-Phenylpropionate	Uncl. Succinivibrionaceae	Metabolite	Bacteria	3-PhenylpropionateUncl. Succinivibrionaceae	5	121	216	0,9856	7	0,9023	0,9980	<,0001	DUO	12hL
3-Phenylpropionate	Uncl. Succinivibrionaceae	Metabolite	Bacteria	3-PhenylpropionateUncl. Succinivibrionaceae	5	121	216	0,8994	6	0,3253	0,9890	0,0147	RUM	72hL
3-Phenylpropionate	Uncl. Succinivibrionaceae	Metabolite	Bacteria	3-PhenylpropionateUncl. Succinivibrionaceae	5	121	216	-0,8489	7	-0,9772	-0,2656	0,0157	DUO	+100
3-Phenylpropionate	Uncl. Succinivibrionaceae	Metabolite	Bacteria	3-PhenylpropionateUncl. Succinivibrionaceae	5	121	216	0,9338	5	0,2929	0,9957	0,0202	DUO	12hC
Methylamine	Uncl. Succinivibrionaceae	Metabolite	Bacteria	MethylamineUncl. Succinivibrionaceae	6	120	216	0,9972	6	0,9738	0,9997	<,0001	DUO	-42
Methylamine	Uncl. Succinivibrionaceae	Metabolite	Bacteria	MethylamineUncl. Succinivibrionaceae	6	120	216	0,9719	7	0,8164	0,9960	0,0003	DUO	12hL
Methylamine	Uncl. Succinivibrionaceae	Metabolite	Bacteria	MethylamineUncl. Succinivibrionaceae	6	120	216	-0,8369	7	-0,9753	-0,2268	0,0189	DUO	+100
Methylamine	Uncl. Succinivibrionaceae	Metabolite	Bacteria	MethylamineUncl. Succinivibrionaceae	6	120	216	0,8239	7	0,1866	0,9732	0,0227	RUM	-42
Methylamine	Uncl. Succinivibrionaceae	Metabolite	Bacteria	MethylamineUncl. Succinivibrionaceae	6	120	216	-0,8740	6	-0,9861	-0,2147	0,0228	RUM	+126
Methylamine	Uncl. Succinivibrionaceae	Metabolite	Bacteria	MethylamineUncl. Succinivibrionaceae	6	120	216	0,9134	5	0,1605	0,9944	0,0302	RUM	24hL
Isovalerate	Uncl. Succinivibrionaceae	Metabolite	Bacteria	IsovalerateUncl. Succinivibrionaceae	3	119	216	0,9845	6	0,8600	0,9984	0,0004	DUO	-42
Isovalerate	Uncl. Succinivibrionaceae	Metabolite	Bacteria	IsovalerateUncl. Succinivibrionaceae	3	119	216	0,9321	7	0,6007	0,9901	0,0022	DUO	12hL
Isovalerate	Uncl. Succinivibrionaceae	Metabolite	Bacteria	IsovalerateUncl. Succinivibrionaceae	3	119	216	-0,7895	7	-0,9674	-0,0900	0,0347	DUO	+100
Methanol	Uncl. Succinivibrionaceae	Metabolite	Bacteria	MethanolUncl. Succinivibrionaceae	5	118	216	10000	6	0,9998	10000	<,0001	DUO	-42
Methanol	Uncl. Succinivibrionaceae	Metabolite	Bacteria	MethanolUncl. Succinivibrionaceae	5	118	216	0,9854	7	0,9005	0,9979	<,0001	DUO	12hL
Methanol	Uncl. Succinivibrionaceae	Metabolite	Bacteria	MethanolUncl. Succinivibrionaceae	5	118	216	0,9838	4	0,4179	0,9997	0,0162	DUO	+118
Methanol	Uncl. Succinivibrionaceae	Metabolite	Bacteria	MethanolUncl. Succinivibrionaceae	5	118	216	0,8782	6	0,2319	0,9866	0,0214	RUM	+118
Methanol	Uncl. Succinivibrionaceae	Metabolite	Bacteria	MethanolUncl. Succinivibrionaceae	5	118	216	0,8009	7	0,1206	0,9693	0,0304	RUM	-42
Histidine	Uncl. Succinivibrionaceae	Metabolite	Bacteria	HistidineUncl. Succinivibrionaceae	5	116	216	0,9999	6	0,9994	10000	<,0001	DUO	-42
Tyrosine	Uncl. Succinivibrionaceae	Metabolite	Bacteria	TyrosineUncl. Succinivibrionaceae	2	116	216	0,9994	6	0,9941	0,9999	<,0001	DUO	-42
Histidine	Uncl. Succinivibrionaceae	Metabolite	Bacteria	HistidineUncl. Succinivibrionaceae	5	116	216	0,9828	7	0,8843	0,9976	<,0001	DUO	12hL
Tyrosine	Uncl. Succinivibrionaceae	Metabolite	Bacteria	TyrosineUncl. Succinivibrionaceae	2	116	216	0,9846	7	0,8957	0,9978	<,0001	DUO	12hL
Histidine	Uncl. Succinivibrionaceae	Metabolite	Bacteria	HistidineUncl. Succinivibrionaceae	5	116	216	0,9985	4	0,9293	10000	0,0015	DUO	+118
Histidine	Uncl. Succinivibrionaceae	Metabolite	Bacteria	HistidineUncl. Succinivibrionaceae	5	116	216	0,9231	5	0,2202	0,9950	0,0253	DUO	12hC
Histidine	Uncl. Succinivibrionaceae	Metabolite	Bacteria	HistidineUncl. Succinivibrionaceae	5	116	216	-0,8036	7	-0,9698	-0,1279	0,0295	DUO	+100
Acetoacetate	Uncl. Succinivibrionaceae	Metabolite	Bacteria	AcetoacetateUncl. Succinivibrionaceae	2	115	216	0,9982	6	0,9824	0,9998	<,0001	DUO	-42
Acetoacetate	Uncl. Succinivibrionaceae	Metabolite	Bacteria	AcetoacetateUncl. Succinivibrionaceae	2	115	216	0,9936	7	0,9557	0,9991	<,0001	DUO	12hL
Glutamate	Uncl. Succinivibrionaceae	Metabolite	Bacteria	GlutamateUncl. Succinivibrionaceae	3	114	216	0,9987	6	0,9880	0,9999	<,0001	DUO	-42
Xanthine	Uncl. Succinivibrionaceae	Metabolite	Bacteria	XanthineUncl. Succinivibrionaceae	2	114	216	0,9988	6	0,9888	0,9999	<,0001	DUO	-42
Xanthine	Uncl. Succinivibrionaceae	Metabolite	Bacteria	XanthineUncl. Succinivibrionaceae	2	114	216	0,9802	7	0,8674	0,9972	0,0001	DUO	12hL
Glutamate	Uncl. Succinivibrionaceae	Metabolite	Bacteria	GlutamateUncl. Succinivibrionaceae	3	114	216	0,9683	7	0,7948	0,9955	0,0003	DUO	12hL
Glutamate	Uncl. Succinivibrionaceae	Metabolite	Bacteria	GlutamateUncl. Succinivibrionaceae	3	114	216	0,7682	7	0,0359	0,9637	0,0437	DUO	24hC
3-Hydroxybutyrate	Uncl. Succinivibrionaceae	Metabolite	Bacteria	3-HydroxybutyrateUncl. Succinivibrionaceae	4	112	216	0,9968	6	0,9695	0,9997	<,0001	DUO	-42
3-Hydroxybutyrate	Uncl. Succinivibrionaceae	Metabolite	Bacteria	3-HydroxybutyrateUncl. Succinivibrionaceae	4	112	216	0,9682	7	0,7944	0,9955	0,0003	DUO	12hL
3-Hydroxybutyrate	Uncl. Succinivibrionaceae	Metabolite	Bacteria	3-HydroxybutyrateUncl. Succinivibrionaceae	4	112	216	-0,8923	7	-0,9841	-0,4246	0,0069	DUO	+100
3-Hydroxybutyrate	Uncl. Succinivibrionaceae	Metabolite	Bacteria	3-HydroxybutyrateUncl. Succinivibrionaceae	4	112	216	0,8452	6	0,1070	0,9827	0,0341	RUM	72hC
Glucose	Uncl. Succinivibrionaceae	Metabolite	Bacteria	GlucoseUncl. Succinivibrionaceae	3	110	216	0,9971	6	0,9720	0,9997	<,0001	DUO	-42
Glucose	Uncl. Succinivibrionaceae	Metabolite	Bacteria	GlucoseUncl. Succinivibrionaceae	3	110	216	0,9836	7	0,8894	0,9977	<,0001	DUO	12hL
Ornithine	Uncl. Succinivibrionaceae	Metabolite	Bacteria	OrnithineUncl. Succinivibrionaceae	4	110	216	0,9841	6	0,8573	0,9983	0,0004	DUO	-42
Ornithine	Uncl. Succinivibrionaceae	Metabolite	Bacteria	OrnithineUncl. Succinivibrionaceae	4	110	216	0,9203	7	0,5448	0,9884	0,0033	DUO	12hL
Ornithine	Uncl. Succinivibrionaceae	Metabolite	Bacteria	OrnithineUncl. Succinivibrionaceae	4	110	216	0,9456	6	0,5764	0,9942	0,0044	RUM	72hL
Ornithine	Uncl. Succinivibrionaceae	Metabolite	Bacteria	OrnithineUncl. Succinivibrionaceae	4	110	216	0,8973	6	0,3156	0,9888	0,0153	RUM	+118
Glucose	Uncl. Succinivibrionaceae	Metabolite	Bacteria	GlucoseUncl. Succinivibrionaceae	3	110	216	0,8183	6	0,0201	0,9794	0,0465	RUM	72hL
Adipate	Uncl. Succinivibrionaceae	Metabolite	Bacteria	AdipateUncl. Succinivibrionaceae	3	109	216	0,9929	6	0,9336	0,9993	<,0001	DUO	-42
Isoleucine	Uncl. Succinivibrionaceae	Metabolite	Bacteria	IsoleucineUncl. Succinivibrionaceae	4	109	216	0,9997	6	0,9975	10000	<,0001	DUO	-42
Adipate	Uncl. Succinivibrionaceae	Metabolite	Bacteria	AdipateUncl. Succinivibrionaceae	3	109	216	0,9914	7	0,9406	0,9988	<,0001	DUO	12hL
Propionate	Uncl. Succinivibrionaceae	Metabolite	Bacteria	PropionateUncl. Succinivibrionaceae	3	109	216	0,9878	6	0,8884	0,9987	0,0002	DUO	-42
Isoleucine	Uncl. Succinivibrionaceae	Metabolite	Bacteria	IsoleucineUncl. Succinivibrionaceae	4	109	216	0,9523	7	0,7044	0,9931	0,0009	DUO	12hL
Adipate	Uncl. Succinivibrionaceae	Metabolite	Bacteria	AdipateUncl. Succinivibrionaceae	3	109	216	-0,9430	6	-0,9939	-0,5601	0,0048	RUM	+126
Propionate	Uncl. Succinivibrionaceae	Metabolite	Bacteria	PropionateUncl. Succinivibrionaceae	3	109	216	0,8508	7	0,2720	0,9775	0,0152	DUO	24hC
Propionate	Uncl. Succinivibrionaceae	Metabolite	Bacteria	PropionateUncl. Succinivibrionaceae	3	109	216	0,7824	7	0,0715	0,9662	0,0376	DUO	12hL
Isoleucine	Uncl. Succinivibrionaceae	Metabolite	Bacteria	IsoleucineUncl. Succinivibrionaceae	4	109	216	0,8990	5	0,0810	0,9934	0,0379	RUM	24hL
Isoleucine	Uncl. Succinivibrionaceae	Metabolite	Bacteria	IsoleucineUncl. Succinivibrionaceae	4	109	216	0,8346	6	0,0714	0,9814	0,0388	RUM	72hL
Isobutyrate	Uncl. Succinivibrionaceae	Metabolite	Bacteria	IsobutyrateUncl. Succinivibrionaceae	4	103	216	0,9918	6	0,9235	0,9991	0,0001	DUO	-42
Isobutyrate	Uncl. Succinivibrionaceae	Metabolite	Bacteria	IsobutyrateUncl. Succinivibrionaceae	4	103	216	0,9872	5	0,8128	0,9992	0,0017	RUM	+14
Isobutyrate	Uncl. Succinivibrionaceae	Metabolite	Bacteria	IsobutyrateUncl. Succinivibrionaceae	4	103	216	0,8908	7	0,4183	0,9839	0,0071	DUO	12hL
Isobutyrate	Uncl. Succinivibrionaceae	Metabolite	Bacteria	IsobutyrateUncl. Succinivibrionaceae	4	103	216	0,9618	4	0,0092	0,9992	0,0382	DUO	72hL
3-Hydroxyphenylacetate	Uncl. Succinivibrionaceae	Metabolite	Bacteria	3-HydroxyphenylacetateUncl. Succinivibrionaceae	2	101	216	0,9976	6	0,9774	0,9998	<,0001	DUO	-42
3-Hydroxyphenylacetate	Uncl. Succinivibrionaceae	Metabolite	Bacteria	3-HydroxyphenylacetateUncl. Succinivibrionaceae	2	101	216	0,9862	7	0,9061	0,9980	<,0001	DUO	12hL
Urea	Uncl. Succinivibrionaceae	Metabolite	Bacteria	UreaUncl. Succinivibrionaceae	1	65	216	0,8557	6	0,1444	0,9839	0,0297	RUM	72hC
Formate	SR1_genera_incertae_sedis	Metabolite	Bacteria	FormateSR1_genera_incertae_sedis	4	178	211	0,9997	6	0,9967	10000	<,0001	DUO	-42
Formate	SR1_genera_incertae_sedis	Metabolite	Bacteria	FormateSR1_genera_incertae_sedis	4	178	211	0,9990	7	0,9927	0,9999	<,0001	DUO	12hL
Formate	SR1_genera_incertae_sedis	Metabolite	Bacteria	FormateSR1_genera_incertae_sedis	4	178	211	0,9994	6	0,9945	0,9999	<,0001	DUO	+126
Formate	SR1_genera_incertae_sedis	Metabolite	Bacteria	FormateSR1_genera_incertae_sedis	4	178	211	-0,9252	5	-0,9952	-0,2339	0,0243	RUM	+100
Choline	SR1_genera_incertae_sedis	Metabolite	Bacteria	CholineSR1_genera_incertae_sedis	4	173	211	0,9998	6	0,9984	10000	<,0001	DUO	-42
Choline	SR1_genera_incertae_sedis	Metabolite	Bacteria	CholineSR1_genera_incertae_sedis	4	173	211	0,9784	7	0,8563	0,9969	0,0001	DUO	12hL
Choline	SR1_genera_incertae_sedis	Metabolite	Bacteria	CholineSR1_genera_incertae_sedis	4	173	211	0,9742	5	0,6543	0,9984	0,0050	RUM	+14
Choline	SR1_genera_incertae_sedis	Metabolite	Bacteria	CholineSR1_genera_incertae_sedis	4	173	211	0,8869	6	0,2689	0,9876	0,0185	DUO	+126
Fumarate	SR1_genera_incertae_sedis	Metabolite	Bacteria	FumarateSR1_genera_incertae_sedis	7	166	211	0,9845	7	0,8946	0,9978	<,0001	DUO	12hL
Fumarate	SR1_genera_incertae_sedis	Metabolite	Bacteria	FumarateSR1_genera_incertae_sedis	7	166	211	10000	4	0,9996	10000	<,0001	DUO	72hL
Fumarate	SR1_genera_incertae_sedis	Metabolite	Bacteria	FumarateSR1_genera_incertae_sedis	7	166	211	0,9985	6	0,9853	0,9998	<,0001	DUO	+126
Fumarate	SR1_genera_incertae_sedis	Metabolite	Bacteria	FumarateSR1_genera_incertae_sedis	7	166	211	0,9873	6	0,8845	0,9987	0,0002	DUO	-42
Fumarate	SR1_genera_incertae_sedis	Metabolite	Bacteria	FumarateSR1_genera_incertae_sedis	7	166	211	0,8694	6	0,1965	0,9856	0,0245	RUM	72hC
Fumarate	SR1_genera_incertae_sedis	Metabolite	Bacteria	FumarateSR1_genera_incertae_sedis	7	166	211	-0,8948	5	-0,9931	-0,0593	0,0403	RUM	+100
Fumarate	SR1_genera_incertae_sedis	Metabolite	Bacteria	FumarateSR1_genera_incertae_sedis	7	166	211	0,8173	6	0,0170	0,9793	0,0470	RUM	+126
Proline	SR1_genera_incertae_sedis	Metabolite	Bacteria	ProlineSR1_genera_incertae_sedis	5	165	211	10000	6	0,9999	10000	<,0001	DUO	-42
Proline	SR1_genera_incertae_sedis	Metabolite	Bacteria	ProlineSR1_genera_incertae_sedis	5	165	211	0,9998	7	0,9985	10000	<,0001	DUO	12hL
Proline	SR1_genera_incertae_sedis	Metabolite	Bacteria	ProlineSR1_genera_incertae_sedis	5	165	211	0,9999	6	0,9993	10000	<,0001	DUO	+126
Proline	SR1_genera_incertae_sedis	Metabolite	Bacteria	ProlineSR1_genera_incertae_sedis	5	165	211	0,9498	5	0,4170	0,9968	0,0134	RUM	+14
Proline	SR1_genera_incertae_sedis	Metabolite	Bacteria	ProlineSR1_genera_incertae_sedis	5	165	211	0,8342	6	0,0701	0,9814	0,0390	RUM	72hL
Aspartate	SR1_genera_incertae_sedis	Metabolite	Bacteria	AspartateSR1_genera_incertae_sedis	6	159	211	0,9996	6	0,9963	10000	<,0001	DUO	-42
Aspartate	SR1_genera_incertae_sedis	Metabolite	Bacteria	AspartateSR1_genera_incertae_sedis	6	159	211	0,9981	7	0,9863	0,9997	<,0001	DUO	12hL
Aspartate	SR1_genera_incertae_sedis	Metabolite	Bacteria	AspartateSR1_genera_incertae_sedis	6	159	211	0,9696	5	0,6046	0,9981	0,0063	RUM	+14
Aspartate	SR1_genera_incertae_sedis	Metabolite	Bacteria	AspartateSR1_genera_incertae_sedis	6	159	211	0,9275	6	0,4691	0,9922	0,0077	DUO	+126
Aspartate	SR1_genera_incertae_sedis	Metabolite	Bacteria	AspartateSR1_genera_incertae_sedis	6	159	211	0,9610	5	0,5175	0,9975	0,0092	RUM	24hL
Aspartate	SR1_genera_incertae_sedis	Metabolite	Bacteria	AspartateSR1_genera_incertae_sedis	6	159	211	0,8420	6	0,0963	0,9823	0,0355	RUM	72hL
Ribose	SR1_genera_incertae_sedis	Metabolite	Bacteria	RiboseSR1_genera_incertae_sedis	7	158	211	0,9998	6	0,9979	10000	<,0001	DUO	-42
Ribose	SR1_genera_incertae_sedis	Metabolite	Bacteria	RiboseSR1_genera_incertae_sedis	7	158	211	0,9996	7	0,9968	0,9999	<,0001	DUO	12hL
Ribose	SR1_genera_incertae_sedis	Metabolite	Bacteria	RiboseSR1_genera_incertae_sedis	7	158	211	0,9887	6	0,8964	0,9988	0,0002	DUO	+126
Ribose	SR1_genera_incertae_sedis	Metabolite	Bacteria	RiboseSR1_genera_incertae_sedis	7	158	211	0,9877	5	0,8201	0,9992	0,0016	RUM	24hL
Ribose	SR1_genera_incertae_sedis	Metabolite	Bacteria	RiboseSR1_genera_incertae_sedis	7	158	211	0,9842	5	0,7746	0,9990	0,0024	RUM	+14
Ribose	SR1_genera_incertae_sedis	Metabolite	Bacteria	RiboseSR1_genera_incertae_sedis	7	158	211	0,9807	5	0,7310	0,9988	0,0032	DUO	12hC
Ribose	SR1_genera_incertae_sedis	Metabolite	Bacteria	RiboseSR1_genera_incertae_sedis	7	158	211	0,8146	6	0,0090	0,9790	0,0484	RUM	72hL
1,3-Dihydroxyacetone	SR1_genera_incertae_sedis	Metabolite	Bacteria	1,3-DihydroxyacetoneSR1_genera_incertae_sedis	4	154	211	0,9999	6	0,9995	10000	<,0001	DUO	-42
Isopropanol	SR1_genera_incertae_sedis	Metabolite	Bacteria	IsopropanolSR1_genera_incertae_sedis	4	154	211	0,9990	6	0,9906	0,9999	<,0001	DUO	-42
1,3-Dihydroxyacetone	SR1_genera_incertae_sedis	Metabolite	Bacteria	1,3-DihydroxyacetoneSR1_genera_incertae_sedis	4	154	211	0,9888	7	0,9229	0,9984	<,0001	DUO	12hL
Isopropanol	SR1_genera_incertae_sedis	Metabolite	Bacteria	IsopropanolSR1_genera_incertae_sedis	4	154	211	0,9954	7	0,9680	0,9994	<,0001	DUO	12hL
Isopropanol	SR1_genera_incertae_sedis	Metabolite	Bacteria	IsopropanolSR1_genera_incertae_sedis	4	154	211	0,9925	6	0,9306	0,9992	<,0001	DUO	+126
1,3-Dihydroxyacetone	SR1_genera_incertae_sedis	Metabolite	Bacteria	1,3-DihydroxyacetoneSR1_genera_incertae_sedis	4	154	211	0,9857	6	0,8704	0,9985	0,0003	DUO	+126
Isopropanol	SR1_genera_incertae_sedis	Metabolite	Bacteria	IsopropanolSR1_genera_incertae_sedis	4	154	211	0,9320	5	0,2797	0,9956	0,0211	RUM	24hL
1,3-Dihydroxyacetone	SR1_genera_incertae_sedis	Metabolite	Bacteria	1,3-DihydroxyacetoneSR1_genera_incertae_sedis	4	154	211	0,9198	5	0,1992	0,9948	0,0269	DUO	12hC
Lactate	SR1_genera_incertae_sedis	Metabolite	Bacteria	LactateSR1_genera_incertae_sedis	5	153	211	0,9980	6	0,9807	0,9998	<,0001	DUO	-42
Lactate	SR1_genera_incertae_sedis	Metabolite	Bacteria	LactateSR1_genera_incertae_sedis	5	153	211	0,9990	5	0,9843	0,9999	<,0001	RUM	+14
Lactate	SR1_genera_incertae_sedis	Metabolite	Bacteria	LactateSR1_genera_incertae_sedis	5	153	211	0,9882	7	0,9195	0,9983	<,0001	DUO	12hL
Lactate	SR1_genera_incertae_sedis	Metabolite	Bacteria	LactateSR1_genera_incertae_sedis	5	153	211	0,9939	5	0,9067	0,9996	0,0006	RUM	24hL
Lactate	SR1_genera_incertae_sedis	Metabolite	Bacteria	LactateSR1_genera_incertae_sedis	5	153	211	0,8565	6	0,1476	0,9841	0,0294	DUO	+126
Serine	SR1_genera_incertae_sedis	Metabolite	Bacteria	SerineSR1_genera_incertae_sedis	5	152	211	10000	6	0,9998	10000	<,0001	DUO	-42
Serine	SR1_genera_incertae_sedis	Metabolite	Bacteria	SerineSR1_genera_incertae_sedis	5	152	211	0,9992	7	0,9946	0,9999	<,0001	DUO	12hL
Serine	SR1_genera_incertae_sedis	Metabolite	Bacteria	SerineSR1_genera_incertae_sedis	5	152	211	0,9721	6	0,7604	0,9971	0,0012	DUO	+126
Serine	SR1_genera_incertae_sedis	Metabolite	Bacteria	SerineSR1_genera_incertae_sedis	5	152	211	0,8516	6	0,1297	0,9835	0,0314	RUM	72hC
Serine	SR1_genera_incertae_sedis	Metabolite	Bacteria	SerineSR1_genera_incertae_sedis	5	152	211	0,8430	6	0,0994	0,9824	0,0351	RUM	72hL
Cadaverine	SR1_genera_incertae_sedis	Metabolite	Bacteria	CadaverineSR1_genera_incertae_sedis	4	143	211	0,9950	6	0,9533	0,9995	<,0001	DUO	-42
Uracil	SR1_genera_incertae_sedis	Metabolite	Bacteria	UracilSR1_genera_incertae_sedis	4	143	211	0,9959	6	0,9608	0,9996	<,0001	DUO	-42
Cadaverine	SR1_genera_incertae_sedis	Metabolite	Bacteria	CadaverineSR1_genera_incertae_sedis	4	143	211	0,9806	7	0,8700	0,9972	<,0001	DUO	12hL
Uracil	SR1_genera_incertae_sedis	Metabolite	Bacteria	UracilSR1_genera_incertae_sedis	4	143	211	0,9972	7	0,9800	0,9996	<,0001	DUO	12hL
Uracil	SR1_genera_incertae_sedis	Metabolite	Bacteria	UracilSR1_genera_incertae_sedis	4	143	211	0,9984	6	0,9847	0,9998	<,0001	DUO	+126
Cadaverine	SR1_genera_incertae_sedis	Metabolite	Bacteria	CadaverineSR1_genera_incertae_sedis	4	143	211	0,9977	5	0,9640	0,9999	0,0001	RUM	24hL
Cadaverine	SR1_genera_incertae_sedis	Metabolite	Bacteria	CadaverineSR1_genera_incertae_sedis	4	143	211	0,9398	6	0,5403	0,9936	0,0053	DUO	+126
Uracil	SR1_genera_incertae_sedis	Metabolite	Bacteria	UracilSR1_genera_incertae_sedis	4	143	211	0,9849	4	0,4452	0,9997	0,0151	DUO	72hL
Lysine	SR1_genera_incertae_sedis	Metabolite	Bacteria	LysineSR1_genera_incertae_sedis	4	140	211	0,9979	6	0,9804	0,9998	<,0001	DUO	-42
Succinate	SR1_genera_incertae_sedis	Metabolite	Bacteria	SuccinateSR1_genera_incertae_sedis	5	140	211	0,9997	6	0,9975	10000	<,0001	DUO	-42
Succinate	SR1_genera_incertae_sedis	Metabolite	Bacteria	SuccinateSR1_genera_incertae_sedis	5	140	211	0,9999	5	0,9977	10000	<,0001	RUM	+14
Succinate	SR1_genera_incertae_sedis	Metabolite	Bacteria	SuccinateSR1_genera_incertae_sedis	5	140	211	0,9955	7	0,9683	0,9994	<,0001	DUO	12hL
Succinate	SR1_genera_incertae_sedis	Metabolite	Bacteria	SuccinateSR1_genera_incertae_sedis	5	140	211	0,9953	6	0,9557	0,9995	<,0001	DUO	+126
Lysine	SR1_genera_incertae_sedis	Metabolite	Bacteria	LysineSR1_genera_incertae_sedis	4	140	211	0,9805	7	0,8694	0,9972	0,0001	DUO	12hL
Lysine	SR1_genera_incertae_sedis	Metabolite	Bacteria	LysineSR1_genera_incertae_sedis	4	140	211	0,9920	5	0,8790	0,9995	0,0009	RUM	24hL
Succinate	SR1_genera_incertae_sedis	Metabolite	Bacteria	SuccinateSR1_genera_incertae_sedis	5	140	211	0,9797	5	0,7187	0,9987	0,0035	DUO	12hC
Allantoin	SR1_genera_incertae_sedis	Metabolite	Bacteria	AllantoinSR1_genera_incertae_sedis	3	140	211	0,8907	7	0,4181	0,9838	0,0071	DUO	12hL
Lysine	SR1_genera_incertae_sedis	Metabolite	Bacteria	LysineSR1_genera_incertae_sedis	4	140	211	0,9192	6	0,4238	0,9913	0,0095	DUO	+126
Allantoin	SR1_genera_incertae_sedis	Metabolite	Bacteria	AllantoinSR1_genera_incertae_sedis	3	140	211	0,8678	6	0,1900	0,9854	0,0251	RUM	72hC
Allantoin	SR1_genera_incertae_sedis	Metabolite	Bacteria	AllantoinSR1_genera_incertae_sedis	3	140	211	0,8959	5	0,0650	0,9932	0,0397	DUO	12hC
4-Hydroxybutyrate	SR1_genera_incertae_sedis	Metabolite	Bacteria	4-HydroxybutyrateSR1_genera_incertae_sedis	3	139	211	0,9999	6	0,9995	10000	<,0001	DUO	-42
4-Hydroxybutyrate	SR1_genera_incertae_sedis	Metabolite	Bacteria	4-HydroxybutyrateSR1_genera_incertae_sedis	3	139	211	0,9989	7	0,9923	0,9998	<,0001	DUO	12hL
Trimethylamine	SR1_genera_incertae_sedis	Metabolite	Bacteria	TrimethylamineSR1_genera_incertae_sedis	2	139	211	0,8707	6	0,2017	0,9857	0,0240	RUM	72hL
4-Hydroxybutyrate	SR1_genera_incertae_sedis	Metabolite	Bacteria	4-HydroxybutyrateSR1_genera_incertae_sedis	3	139	211	0,8447	6	0,1054	0,9826	0,0343	DUO	+126
Trimethylamine	SR1_genera_incertae_sedis	Metabolite	Bacteria	TrimethylamineSR1_genera_incertae_sedis	2	139	211	0,8847	5	0,0110	0,9924	0,0462	RUM	24hL
Pimelate	SR1_genera_incertae_sedis	Metabolite	Bacteria	PimelateSR1_genera_incertae_sedis	3	137	211	0,9939	6	0,9432	0,9994	<,0001	DUO	-42
Pimelate	SR1_genera_incertae_sedis	Metabolite	Bacteria	PimelateSR1_genera_incertae_sedis	3	137	211	0,9534	7	0,7103	0,9933	0,0009	DUO	12hL
Pimelate	SR1_genera_incertae_sedis	Metabolite	Bacteria	PimelateSR1_genera_incertae_sedis	3	137	211	0,9862	4	0,4823	0,9997	0,0138	DUO	72hL
N-nitrosodimethylamine	SR1_genera_incertae_sedis	Metabolite	Bacteria	N-nitrosodimethylamineSR1_genera_incertae_sedis	5	136	211	0,9990	6	0,9906	0,9999	<,0001	DUO	-42
N-nitrosodimethylamine	SR1_genera_incertae_sedis	Metabolite	Bacteria	N-nitrosodimethylamineSR1_genera_incertae_sedis	5	136	211	0,9909	7	0,9369	0,9987	<,0001	DUO	12hL
N-nitrosodimethylamine	SR1_genera_incertae_sedis	Metabolite	Bacteria	N-nitrosodimethylamineSR1_genera_incertae_sedis	5	136	211	0,9179	6	0,4167	0,9911	0,0098	RUM	72hC
N-nitrosodimethylamine	SR1_genera_incertae_sedis	Metabolite	Bacteria	N-nitrosodimethylamineSR1_genera_incertae_sedis	5	136	211	0,8946	6	0,3031	0,9885	0,0161	DUO	+126
N-nitrosodimethylamine	SR1_genera_incertae_sedis	Metabolite	Bacteria	N-nitrosodimethylamineSR1_genera_incertae_sedis	5	136	211	0,8785	6	0,2333	0,9866	0,0212	RUM	72hL
Phenylacetate	SR1_genera_incertae_sedis	Metabolite	Bacteria	PhenylacetateSR1_genera_incertae_sedis	3	134	211	0,9938	6	0,9416	0,9993	<,0001	DUO	-42
Phenylacetate	SR1_genera_incertae_sedis	Metabolite	Bacteria	PhenylacetateSR1_genera_incertae_sedis	3	134	211	0,9918	7	0,9429	0,9988	<,0001	DUO	12hL
Phenylacetate	SR1_genera_incertae_sedis	Metabolite	Bacteria	PhenylacetateSR1_genera_incertae_sedis	3	134	211	0,9336	6	0,5038	0,9929	0,0065	DUO	+126
Caffeine	SR1_genera_incertae_sedis	Metabolite	Bacteria	CaffeineSR1_genera_incertae_sedis	5	133	211	10000	6	0,9999	10000	<,0001	DUO	-42
Hypoxanthine	SR1_genera_incertae_sedis	Metabolite	Bacteria	HypoxanthineSR1_genera_incertae_sedis	3	133	211	0,9999	6	0,9995	10000	<,0001	DUO	-42
Valerate	SR1_genera_incertae_sedis	Metabolite	Bacteria	ValerateSR1_genera_incertae_sedis	2	133	211	0,9930	6	0,9345	0,9993	<,0001	DUO	-42
Caffeine	SR1_genera_incertae_sedis	Metabolite	Bacteria	CaffeineSR1_genera_incertae_sedis	5	133	211	0,9993	7	0,9949	0,9999	<,0001	DUO	12hL
Hypoxanthine	SR1_genera_incertae_sedis	Metabolite	Bacteria	HypoxanthineSR1_genera_incertae_sedis	3	133	211	0,9992	7	0,9940	0,9999	<,0001	DUO	12hL
Caffeine	SR1_genera_incertae_sedis	Metabolite	Bacteria	CaffeineSR1_genera_incertae_sedis	5	133	211	0,9999	6	0,9988	10000	<,0001	DUO	+126
Hypoxanthine	SR1_genera_incertae_sedis	Metabolite	Bacteria	HypoxanthineSR1_genera_incertae_sedis	3	133	211	0,9987	6	0,9877	0,9999	<,0001	DUO	+126
Valerate	SR1_genera_incertae_sedis	Metabolite	Bacteria	ValerateSR1_genera_incertae_sedis	2	133	211	0,9687	7	0,7972	0,9955	0,0003	DUO	12hL
Caffeine	SR1_genera_incertae_sedis	Metabolite	Bacteria	CaffeineSR1_genera_incertae_sedis	5	133	211	0,9545	6	0,6344	0,9952	0,0031	RUM	24hC
Caffeine	SR1_genera_incertae_sedis	Metabolite	Bacteria	CaffeineSR1_genera_incertae_sedis	5	133	211	0,8131	6	0,0046	0,9788	0,0491	RUM	72hL
Acetone	SR1_genera_incertae_sedis	Metabolite	Bacteria	AcetoneSR1_genera_incertae_sedis	3	132	211	0,9975	6	0,9764	0,9997	<,0001	DUO	-42
Acetone	SR1_genera_incertae_sedis	Metabolite	Bacteria	AcetoneSR1_genera_incertae_sedis	3	132	211	0,9891	7	0,9250	0,9985	<,0001	DUO	12hL
Acetone	SR1_genera_incertae_sedis	Metabolite	Bacteria	AcetoneSR1_genera_incertae_sedis	3	132	211	0,9564	6	0,6474	0,9954	0,0028	DUO	+126
Benzoate	SR1_genera_incertae_sedis	Metabolite	Bacteria	BenzoateSR1_genera_incertae_sedis	4	131	211	0,9996	6	0,9958	10000	<,0001	DUO	-42
Valine	SR1_genera_incertae_sedis	Metabolite	Bacteria	ValineSR1_genera_incertae_sedis	4	131	211	0,9997	6	0,9972	10000	<,0001	DUO	-42
Benzoate	SR1_genera_incertae_sedis	Metabolite	Bacteria	BenzoateSR1_genera_incertae_sedis	4	131	211	0,9994	7	0,9959	0,9999	<,0001	DUO	12hL
Valine	SR1_genera_incertae_sedis	Metabolite	Bacteria	ValineSR1_genera_incertae_sedis	4	131	211	0,9928	7	0,9498	0,9990	<,0001	DUO	12hL
Benzoate	SR1_genera_incertae_sedis	Metabolite	Bacteria	BenzoateSR1_genera_incertae_sedis	4	131	211	0,9973	6	0,9748	0,9997	<,0001	DUO	+126
Valine	SR1_genera_incertae_sedis	Metabolite	Bacteria	ValineSR1_genera_incertae_sedis	4	131	211	0,9116	6	0,3847	0,9904	0,0114	DUO	+126
Valine	SR1_genera_incertae_sedis	Metabolite	Bacteria	ValineSR1_genera_incertae_sedis	4	131	211	0,9194	5	0,1964	0,9948	0,0272	RUM	24hL
Benzoate	SR1_genera_incertae_sedis	Metabolite	Bacteria	BenzoateSR1_genera_incertae_sedis	4	131	211	-0,8310	6	-0,9810	-0,0597	0,0404	RUM	12hL
Alanine	SR1_genera_incertae_sedis	Metabolite	Bacteria	AlanineSR1_genera_incertae_sedis	3	130	211	0,9947	6	0,9497	0,9994	<,0001	DUO	-42
Carnitine	SR1_genera_incertae_sedis	Metabolite	Bacteria	CarnitineSR1_genera_incertae_sedis	3	130	211	10000	6	0,9997	10000	<,0001	DUO	-42
Glycerol	SR1_genera_incertae_sedis	Metabolite	Bacteria	GlycerolSR1_genera_incertae_sedis	3	130	211	10000	6	0,9999	10000	<,0001	DUO	-42
Imidazole	SR1_genera_incertae_sedis	Metabolite	Bacteria	ImidazoleSR1_genera_incertae_sedis	4	130	211	0,9999	6	0,9992	10000	<,0001	DUO	-42
Leucine	SR1_genera_incertae_sedis	Metabolite	Bacteria	LeucineSR1_genera_incertae_sedis	3	130	211	0,9949	6	0,9518	0,9995	<,0001	DUO	-42
Carnitine	SR1_genera_incertae_sedis	Metabolite	Bacteria	CarnitineSR1_genera_incertae_sedis	3	130	211	0,9924	7	0,9475	0,9989	<,0001	DUO	12hL
Glycerol	SR1_genera_incertae_sedis	Metabolite	Bacteria	GlycerolSR1_genera_incertae_sedis	3	130	211	0,9998	7	0,9985	10000	<,0001	DUO	12hL
Imidazole	SR1_genera_incertae_sedis	Metabolite	Bacteria	ImidazoleSR1_genera_incertae_sedis	4	130	211	0,9997	7	0,9982	10000	<,0001	DUO	12hL
Imidazole	SR1_genera_incertae_sedis	Metabolite	Bacteria	ImidazoleSR1_genera_incertae_sedis	4	130	211	0,9999	6	0,9994	10000	<,0001	DUO	+126
Alanine	SR1_genera_incertae_sedis	Metabolite	Bacteria	AlanineSR1_genera_incertae_sedis	3	130	211	0,9484	7	0,6835	0,9926	0,0011	DUO	12hL
Leucine	SR1_genera_incertae_sedis	Metabolite	Bacteria	LeucineSR1_genera_incertae_sedis	3	130	211	0,9303	7	0,5917	0,9899	0,0024	DUO	12hL
Glycerol	SR1_genera_incertae_sedis	Metabolite	Bacteria	GlycerolSR1_genera_incertae_sedis	3	130	211	0,9504	6	0,6073	0,9947	0,0036	DUO	+126
Leucine	SR1_genera_incertae_sedis	Metabolite	Bacteria	LeucineSR1_genera_incertae_sedis	3	130	211	0,9710	5	0,6191	0,9982	0,0059	RUM	24hL
Alanine	SR1_genera_incertae_sedis	Metabolite	Bacteria	AlanineSR1_genera_incertae_sedis	3	130	211	0,9594	5	0,5021	0,9974	0,0098	RUM	24hL
Dimethylamine	SR1_genera_incertae_sedis	Metabolite	Bacteria	DimethylamineSR1_genera_incertae_sedis	1	130	211	0,8676	6	0,1892	0,9854	0,0252	RUM	72hL
Imidazole	SR1_genera_incertae_sedis	Metabolite	Bacteria	ImidazoleSR1_genera_incertae_sedis	4	130	211	0,9703	4	0,1371	0,9994	0,0297	DUO	72hL
Carnitine	SR1_genera_incertae_sedis	Metabolite	Bacteria	CarnitineSR1_genera_incertae_sedis	3	130	211	0,8366	6	0,0780	0,9817	0,0379	RUM	72hL
Ethanol	SR1_genera_incertae_sedis	Metabolite	Bacteria	EthanolSR1_genera_incertae_sedis	5	129	211	0,9998	6	0,9979	10000	<,0001	DUO	-42
Ethanol	SR1_genera_incertae_sedis	Metabolite	Bacteria	EthanolSR1_genera_incertae_sedis	5	129	211	0,9964	7	0,9750	0,9995	<,0001	DUO	12hL
Ethanol	SR1_genera_incertae_sedis	Metabolite	Bacteria	EthanolSR1_genera_incertae_sedis	5	129	211	0,9773	6	0,8016	0,9976	0,0008	DUO	+126
Ethanol	SR1_genera_incertae_sedis	Metabolite	Bacteria	EthanolSR1_genera_incertae_sedis	5	129	211	0,9115	6	0,3840	0,9904	0,0114	RUM	72hL
Ethanol	SR1_genera_incertae_sedis	Metabolite	Bacteria	EthanolSR1_genera_incertae_sedis	5	129	211	0,9120	5	0,1524	0,9943	0,0309	RUM	24hL
2-Phenylpropionate	SR1_genera_incertae_sedis	Metabolite	Bacteria	2-PhenylpropionateSR1_genera_incertae_sedis	4	127	211	0,9984	6	0,9843	0,9998	<,0001	DUO	-42
N-Phenylacetylglycine	SR1_genera_incertae_sedis	Metabolite	Bacteria	N-PhenylacetylglycineSR1_genera_incertae_sedis	3	127	211	10000	6	0,9999	10000	<,0001	DUO	-42
2-Phenylpropionate	SR1_genera_incertae_sedis	Metabolite	Bacteria	2-PhenylpropionateSR1_genera_incertae_sedis	4	127	211	0,9957	7	0,9698	0,9994	<,0001	DUO	12hL
N-Phenylacetylglycine	SR1_genera_incertae_sedis	Metabolite	Bacteria	N-PhenylacetylglycineSR1_genera_incertae_sedis	3	127	211	0,9983	7	0,9883	0,9998	<,0001	DUO	12hL
2-Phenylpropionate	SR1_genera_incertae_sedis	Metabolite	Bacteria	2-PhenylpropionateSR1_genera_incertae_sedis	4	127	211	0,9684	6	0,7324	0,9967	0,0015	DUO	+126
N-Phenylacetylglycine	SR1_genera_incertae_sedis	Metabolite	Bacteria	N-PhenylacetylglycineSR1_genera_incertae_sedis	3	127	211	0,9389	6	0,5351	0,9935	0,0055	DUO	+126
2-Phenylpropionate	SR1_genera_incertae_sedis	Metabolite	Bacteria	2-PhenylpropionateSR1_genera_incertae_sedis	4	127	211	0,8515	6	0,1292	0,9834	0,0315	RUM	72hL
Glycine	SR1_genera_incertae_sedis	Metabolite	Bacteria	GlycineSR1_genera_incertae_sedis	1	127	211	0,8255	6	0,0421	0,9803	0,0430	DUO	-42
Butyrate	SR1_genera_incertae_sedis	Metabolite	Bacteria	ButyrateSR1_genera_incertae_sedis	2	126	211	0,9970	6	0,9713	0,9997	<,0001	DUO	-42
Phenylalanine	SR1_genera_incertae_sedis	Metabolite	Bacteria	PhenylalanineSR1_genera_incertae_sedis	3	126	211	0,9990	6	0,9902	0,9999	<,0001	DUO	-42
Phenylalanine	SR1_genera_incertae_sedis	Metabolite	Bacteria	PhenylalanineSR1_genera_incertae_sedis	3	126	211	0,9996	7	0,9973	0,9999	<,0001	DUO	12hL
Butyrate	SR1_genera_incertae_sedis	Metabolite	Bacteria	ButyrateSR1_genera_incertae_sedis	2	126	211	0,9675	7	0,7903	0,9954	0,0004	DUO	12hL
Phenylalanine	SR1_genera_incertae_sedis	Metabolite	Bacteria	PhenylalanineSR1_genera_incertae_sedis	3	126	211	0,9328	6	0,4990	0,9928	0,0066	DUO	+126
Ferulate	SR1_genera_incertae_sedis	Metabolite	Bacteria	FerulateSR1_genera_incertae_sedis	4	124	211	0,9928	6	0,9327	0,9992	<,0001	DUO	-42
Maltose	SR1_genera_incertae_sedis	Metabolite	Bacteria	MaltoseSR1_genera_incertae_sedis	3	124	211	0,9950	6	0,9531	0,9995	<,0001	DUO	-42
Ferulate	SR1_genera_incertae_sedis	Metabolite	Bacteria	FerulateSR1_genera_incertae_sedis	4	124	211	0,9960	7	0,9719	0,9994	<,0001	DUO	12hL
Maltose	SR1_genera_incertae_sedis	Metabolite	Bacteria	MaltoseSR1_genera_incertae_sedis	3	124	211	0,9997	7	0,9981	10000	<,0001	DUO	12hL
Ferulate	SR1_genera_incertae_sedis	Metabolite	Bacteria	FerulateSR1_genera_incertae_sedis	4	124	211	0,9727	6	0,7654	0,9971	0,0011	DUO	+126
Ferulate	SR1_genera_incertae_sedis	Metabolite	Bacteria	FerulateSR1_genera_incertae_sedis	4	124	211	0,8918	6	0,2903	0,9882	0,0169	RUM	72hL
Maltose	SR1_genera_incertae_sedis	Metabolite	Bacteria	MaltoseSR1_genera_incertae_sedis	3	124	211	0,8558	6	0,1447	0,9840	0,0297	RUM	+118
Nicotinate	SR1_genera_incertae_sedis	Metabolite	Bacteria	NicotinateSR1_genera_incertae_sedis	3	123	211	10000	6	10000	10000	<,0001	DUO	-42
Nicotinate	SR1_genera_incertae_sedis	Metabolite	Bacteria	NicotinateSR1_genera_incertae_sedis	3	123	211	0,9999	7	0,9995	10000	<,0001	DUO	12hL
Nicotinate	SR1_genera_incertae_sedis	Metabolite	Bacteria	NicotinateSR1_genera_incertae_sedis	3	123	211	0,9999	6	0,9995	10000	<,0001	DUO	+126
3-Phenylpropionate	SR1_genera_incertae_sedis	Metabolite	Bacteria	3-PhenylpropionateSR1_genera_incertae_sedis	4	121	211	0,9996	6	0,9957	10000	<,0001	DUO	-42
3-Phenylpropionate	SR1_genera_incertae_sedis	Metabolite	Bacteria	3-PhenylpropionateSR1_genera_incertae_sedis	4	121	211	0,9990	7	0,9927	0,9999	<,0001	DUO	12hL
3-Phenylpropionate	SR1_genera_incertae_sedis	Metabolite	Bacteria	3-PhenylpropionateSR1_genera_incertae_sedis	4	121	211	0,9960	6	0,9626	0,9996	<,0001	DUO	+126
3-Phenylpropionate	SR1_genera_incertae_sedis	Metabolite	Bacteria	3-PhenylpropionateSR1_genera_incertae_sedis	4	121	211	0,9338	5	0,2929	0,9957	0,0202	DUO	12hC
Methylamine	SR1_genera_incertae_sedis	Metabolite	Bacteria	MethylamineSR1_genera_incertae_sedis	5	120	211	0,9972	6	0,9738	0,9997	<,0001	DUO	-42
Methylamine	SR1_genera_incertae_sedis	Metabolite	Bacteria	MethylamineSR1_genera_incertae_sedis	5	120	211	0,9538	7	0,7127	0,9934	0,0009	DUO	12hL
Methylamine	SR1_genera_incertae_sedis	Metabolite	Bacteria	MethylamineSR1_genera_incertae_sedis	5	120	211	0,8877	6	0,2723	0,9877	0,0182	DUO	+126
Methylamine	SR1_genera_incertae_sedis	Metabolite	Bacteria	MethylamineSR1_genera_incertae_sedis	5	120	211	0,9092	5	0,1361	0,9941	0,0324	RUM	24hL
Methylamine	SR1_genera_incertae_sedis	Metabolite	Bacteria	MethylamineSR1_genera_incertae_sedis	5	120	211	0,8403	6	0,0905	0,9821	0,0362	RUM	72hL
Isovalerate	SR1_genera_incertae_sedis	Metabolite	Bacteria	IsovalerateSR1_genera_incertae_sedis	2	119	211	0,9845	6	0,8600	0,9984	0,0004	DUO	-42
Isovalerate	SR1_genera_incertae_sedis	Metabolite	Bacteria	IsovalerateSR1_genera_incertae_sedis	2	119	211	0,8697	7	0,3382	0,9806	0,0110	DUO	12hL
Methanol	SR1_genera_incertae_sedis	Metabolite	Bacteria	MethanolSR1_genera_incertae_sedis	3	118	211	10000	6	0,9998	10000	<,0001	DUO	-42
Methanol	SR1_genera_incertae_sedis	Metabolite	Bacteria	MethanolSR1_genera_incertae_sedis	3	118	211	0,9983	7	0,9880	0,9998	<,0001	DUO	12hL
Methanol	SR1_genera_incertae_sedis	Metabolite	Bacteria	MethanolSR1_genera_incertae_sedis	3	118	211	0,9991	6	0,9916	0,9999	<,0001	DUO	+126
Histidine	SR1_genera_incertae_sedis	Metabolite	Bacteria	HistidineSR1_genera_incertae_sedis	4	116	211	0,9999	6	0,9994	10000	<,0001	DUO	-42
Tyrosine	SR1_genera_incertae_sedis	Metabolite	Bacteria	TyrosineSR1_genera_incertae_sedis	3	116	211	0,9994	6	0,9941	0,9999	<,0001	DUO	-42
Histidine	SR1_genera_incertae_sedis	Metabolite	Bacteria	HistidineSR1_genera_incertae_sedis	4	116	211	0,9999	7	0,9995	10000	<,0001	DUO	12hL
Tyrosine	SR1_genera_incertae_sedis	Metabolite	Bacteria	TyrosineSR1_genera_incertae_sedis	3	116	211	0,9997	7	0,9981	10000	<,0001	DUO	12hL
Histidine	SR1_genera_incertae_sedis	Metabolite	Bacteria	HistidineSR1_genera_incertae_sedis	4	116	211	0,9998	6	0,9977	10000	<,0001	DUO	+126
Tyrosine	SR1_genera_incertae_sedis	Metabolite	Bacteria	TyrosineSR1_genera_incertae_sedis	3	116	211	0,9343	6	0,5077	0,9930	0,0063	DUO	+126
Histidine	SR1_genera_incertae_sedis	Metabolite	Bacteria	HistidineSR1_genera_incertae_sedis	4	116	211	0,9231	5	0,2202	0,9950	0,0253	DUO	12hC
Acetoacetate	SR1_genera_incertae_sedis	Metabolite	Bacteria	AcetoacetateSR1_genera_incertae_sedis	3	115	211	0,9982	6	0,9824	0,9998	<,0001	DUO	-42
Acetoacetate	SR1_genera_incertae_sedis	Metabolite	Bacteria	AcetoacetateSR1_genera_incertae_sedis	3	115	211	0,9793	7	0,8615	0,9971	0,0001	DUO	12hL
Acetoacetate	SR1_genera_incertae_sedis	Metabolite	Bacteria	AcetoacetateSR1_genera_incertae_sedis	3	115	211	0,8849	6	0,2602	0,9874	0,0191	RUM	72hL
Glutamate	SR1_genera_incertae_sedis	Metabolite	Bacteria	GlutamateSR1_genera_incertae_sedis	4	114	211	0,9987	6	0,9880	0,9999	<,0001	DUO	-42
Xanthine	SR1_genera_incertae_sedis	Metabolite	Bacteria	XanthineSR1_genera_incertae_sedis	3	114	211	0,9988	6	0,9888	0,9999	<,0001	DUO	-42
Glutamate	SR1_genera_incertae_sedis	Metabolite	Bacteria	GlutamateSR1_genera_incertae_sedis	4	114	211	0,9845	7	0,8950	0,9978	<,0001	DUO	12hL
Xanthine	SR1_genera_incertae_sedis	Metabolite	Bacteria	XanthineSR1_genera_incertae_sedis	3	114	211	0,9997	7	0,9980	10000	<,0001	DUO	12hL
Xanthine	SR1_genera_incertae_sedis	Metabolite	Bacteria	XanthineSR1_genera_incertae_sedis	3	114	211	0,9951	6	0,9534	0,9995	<,0001	DUO	+126
Glutamate	SR1_genera_incertae_sedis	Metabolite	Bacteria	GlutamateSR1_genera_incertae_sedis	4	114	211	0,9355	6	0,5149	0,9931	0,0061	DUO	+126
Glutamate	SR1_genera_incertae_sedis	Metabolite	Bacteria	GlutamateSR1_genera_incertae_sedis	4	114	211	0,8969	6	0,3136	0,9888	0,0154	RUM	72hL
3-Hydroxybutyrate	SR1_genera_incertae_sedis	Metabolite	Bacteria	3-HydroxybutyrateSR1_genera_incertae_sedis	4	112	211	0,9968	6	0,9695	0,9997	<,0001	DUO	-42
3-Hydroxybutyrate	SR1_genera_incertae_sedis	Metabolite	Bacteria	3-HydroxybutyrateSR1_genera_incertae_sedis	4	112	211	0,9870	7	0,9115	0,9982	<,0001	DUO	12hL
3-Hydroxybutyrate	SR1_genera_incertae_sedis	Metabolite	Bacteria	3-HydroxybutyrateSR1_genera_incertae_sedis	4	112	211	0,9475	6	0,5884	0,9944	0,0041	DUO	+126
3-Hydroxybutyrate	SR1_genera_incertae_sedis	Metabolite	Bacteria	3-HydroxybutyrateSR1_genera_incertae_sedis	4	112	211	0,8452	6	0,1070	0,9827	0,0341	RUM	72hC
Glucose	SR1_genera_incertae_sedis	Metabolite	Bacteria	GlucoseSR1_genera_incertae_sedis	4	110	211	0,9971	6	0,9720	0,9997	<,0001	DUO	-42
Glucose	SR1_genera_incertae_sedis	Metabolite	Bacteria	GlucoseSR1_genera_incertae_sedis	4	110	211	0,9997	7	0,9977	10000	<,0001	DUO	12hL
Ornithine	SR1_genera_incertae_sedis	Metabolite	Bacteria	OrnithineSR1_genera_incertae_sedis	3	110	211	0,9841	6	0,8573	0,9983	0,0004	DUO	-42
Ornithine	SR1_genera_incertae_sedis	Metabolite	Bacteria	OrnithineSR1_genera_incertae_sedis	3	110	211	0,9433	7	0,6568	0,9918	0,0014	DUO	12hL
Ornithine	SR1_genera_incertae_sedis	Metabolite	Bacteria	OrnithineSR1_genera_incertae_sedis	3	110	211	0,9465	6	0,5823	0,9943	0,0042	DUO	+126
Glucose	SR1_genera_incertae_sedis	Metabolite	Bacteria	GlucoseSR1_genera_incertae_sedis	4	110	211	0,8767	6	0,2259	0,9864	0,0219	RUM	72hL
Glucose	SR1_genera_incertae_sedis	Metabolite	Bacteria	GlucoseSR1_genera_incertae_sedis	4	110	211	0,8575	6	0,1511	0,9842	0,0290	DUO	+126
Adipate	SR1_genera_incertae_sedis	Metabolite	Bacteria	AdipateSR1_genera_incertae_sedis	2	109	211	0,9929	6	0,9336	0,9993	<,0001	DUO	-42
Isoleucine	SR1_genera_incertae_sedis	Metabolite	Bacteria	IsoleucineSR1_genera_incertae_sedis	4	109	211	0,9997	6	0,9975	10000	<,0001	DUO	-42
Adipate	SR1_genera_incertae_sedis	Metabolite	Bacteria	AdipateSR1_genera_incertae_sedis	2	109	211	0,9894	7	0,9270	0,9985	<,0001	DUO	12hL
Propionate	SR1_genera_incertae_sedis	Metabolite	Bacteria	PropionateSR1_genera_incertae_sedis	1	109	211	0,9878	6	0,8884	0,9987	0,0002	DUO	-42
Isoleucine	SR1_genera_incertae_sedis	Metabolite	Bacteria	IsoleucineSR1_genera_incertae_sedis	4	109	211	0,9676	7	0,7909	0,9954	0,0004	DUO	12hL
Isoleucine	SR1_genera_incertae_sedis	Metabolite	Bacteria	IsoleucineSR1_genera_incertae_sedis	4	109	211	0,9036	5	0,1055	0,9937	0,0354	RUM	24hL
Isoleucine	SR1_genera_incertae_sedis	Metabolite	Bacteria	IsoleucineSR1_genera_incertae_sedis	4	109	211	0,8378	6	0,0820	0,9818	0,0373	RUM	72hL
Isobutyrate	SR1_genera_incertae_sedis	Metabolite	Bacteria	IsobutyrateSR1_genera_incertae_sedis	4	103	211	0,9918	6	0,9235	0,9991	0,0001	DUO	-42
Isobutyrate	SR1_genera_incertae_sedis	Metabolite	Bacteria	IsobutyrateSR1_genera_incertae_sedis	4	103	211	0,9872	5	0,8128	0,9992	0,0017	RUM	+14
Isobutyrate	SR1_genera_incertae_sedis	Metabolite	Bacteria	IsobutyrateSR1_genera_incertae_sedis	4	103	211	0,7864	7	0,0817	0,9669	0,0360	DUO	12hL
Isobutyrate	SR1_genera_incertae_sedis	Metabolite	Bacteria	IsobutyrateSR1_genera_incertae_sedis	4	103	211	0,9618	4	0,0092	0,9992	0,0382	DUO	72hL
3-Hydroxyphenylacetate	SR1_genera_incertae_sedis	Metabolite	Bacteria	3-HydroxyphenylacetateSR1_genera_incertae_sedis	4	101	211	0,9976	6	0,9774	0,9998	<,0001	DUO	-42
3-Hydroxyphenylacetate	SR1_genera_incertae_sedis	Metabolite	Bacteria	3-HydroxyphenylacetateSR1_genera_incertae_sedis	4	101	211	0,9991	7	0,9938	0,9999	<,0001	DUO	12hL
3-Hydroxyphenylacetate	SR1_genera_incertae_sedis	Metabolite	Bacteria	3-HydroxyphenylacetateSR1_genera_incertae_sedis	4	101	211	0,9829	6	0,8473	0,9982	0,0004	DUO	+126
3-Hydroxyphenylacetate	SR1_genera_incertae_sedis	Metabolite	Bacteria	3-HydroxyphenylacetateSR1_genera_incertae_sedis	4	101	211	0,8741	6	0,2153	0,9861	0,0228	RUM	72hL
Urea	SR1_genera_incertae_sedis	Metabolite	Bacteria	UreaSR1_genera_incertae_sedis	1	65	211	0,8557	6	0,1444	0,9839	0,0297	RUM	72hC
Formate	Ruminobacter	Metabolite	Bacteria	FormateRuminobacter	4	178	202	0,9979	6	0,9797	0,9998	<,0001	DUO	+126
Formate	Ruminobacter	Metabolite	Bacteria	FormateRuminobacter	4	178	202	0,9439	6	0,5654	0,9940	0,0046	DUO	-42
Formate	Ruminobacter	Metabolite	Bacteria	FormateRuminobacter	4	178	202	-0,9038	6	-0,9895	-0,3462	0,0134	RUM	12hL
Formate	Ruminobacter	Metabolite	Bacteria	FormateRuminobacter	4	178	202	0,8486	7	0,2648	0,9772	0,0157	DUO	12hL
Choline	Ruminobacter	Metabolite	Bacteria	CholineRuminobacter	3	173	202	0,9474	6	0,5878	0,9944	0,0041	DUO	-42
Choline	Ruminobacter	Metabolite	Bacteria	CholineRuminobacter	3	173	202	0,8756	6	0,2214	0,9863	0,0222	DUO	+126
Choline	Ruminobacter	Metabolite	Bacteria	CholineRuminobacter	3	173	202	0,8057	7	0,1339	0,9701	0,0287	DUO	12hL
Fumarate	Ruminobacter	Metabolite	Bacteria	FumarateRuminobacter	4	166	202	0,9960	6	0,9621	0,9996	<,0001	DUO	+126
Fumarate	Ruminobacter	Metabolite	Bacteria	FumarateRuminobacter	4	166	202	0,9293	6	0,4788	0,9924	0,0073	DUO	-42
Fumarate	Ruminobacter	Metabolite	Bacteria	FumarateRuminobacter	4	166	202	0,8997	6	0,3269	0,9891	0,0146	RUM	24hC
Fumarate	Ruminobacter	Metabolite	Bacteria	FumarateRuminobacter	4	166	202	0,8162	7	0,1640	0,9719	0,0251	DUO	12hL
Proline	Ruminobacter	Metabolite	Bacteria	ProlineRuminobacter	5	165	202	0,9986	6	0,9868	0,9999	<,0001	DUO	+126
Proline	Ruminobacter	Metabolite	Bacteria	ProlineRuminobacter	5	165	202	0,9414	7	0,6471	0,9915	0,0015	DUO	24hC
Proline	Ruminobacter	Metabolite	Bacteria	ProlineRuminobacter	5	165	202	0,9465	6	0,5819	0,9943	0,0042	DUO	-42
Proline	Ruminobacter	Metabolite	Bacteria	ProlineRuminobacter	5	165	202	0,8588	7	0,2994	0,9788	0,0133	DUO	12hL
Proline	Ruminobacter	Metabolite	Bacteria	ProlineRuminobacter	5	165	202	0,8473	6	0,1145	0,9830	0,0332	RUM	+118
Aspartate	Ruminobacter	Metabolite	Bacteria	AspartateRuminobacter	4	159	202	0,9411	6	0,5483	0,9937	0,0051	DUO	-42
Aspartate	Ruminobacter	Metabolite	Bacteria	AspartateRuminobacter	4	159	202	0,9189	6	0,4220	0,9912	0,0096	DUO	+126
Aspartate	Ruminobacter	Metabolite	Bacteria	AspartateRuminobacter	4	159	202	0,8609	7	0,3065	0,9792	0,0128	DUO	12hL
Aspartate	Ruminobacter	Metabolite	Bacteria	AspartateRuminobacter	4	159	202	0,9030	6	0,3423	0,9895	0,0137	RUM	+118
Ribose	Ruminobacter	Metabolite	Bacteria	RiboseRuminobacter	6	158	202	0,9843	6	0,8583	0,9984	0,0004	DUO	+126
Ribose	Ruminobacter	Metabolite	Bacteria	RiboseRuminobacter	6	158	202	0,9885	5	0,8314	0,9993	0,0015	RUM	24hL
Ribose	Ruminobacter	Metabolite	Bacteria	RiboseRuminobacter	6	158	202	0,9466	6	0,5824	0,9943	0,0042	DUO	-42
Ribose	Ruminobacter	Metabolite	Bacteria	RiboseRuminobacter	6	158	202	0,8579	7	0,2961	0,9787	0,0135	DUO	12hL
Ribose	Ruminobacter	Metabolite	Bacteria	RiboseRuminobacter	6	158	202	0,8565	7	0,2914	0,9785	0,0138	DUO	24hC
Ribose	Ruminobacter	Metabolite	Bacteria	RiboseRuminobacter	6	158	202	0,9310	5	0,2731	0,9955	0,0215	DUO	12hC
Isopropanol	Ruminobacter	Metabolite	Bacteria	IsopropanolRuminobacter	4	154	202	0,9892	6	0,9012	0,9989	0,0002	DUO	+126
1,3-Dihydroxyacetone	Ruminobacter	Metabolite	Bacteria	1,3-DihydroxyacetoneRuminobacter	6	154	202	0,9816	6	0,8361	0,9981	0,0005	DUO	+126
Isopropanol	Ruminobacter	Metabolite	Bacteria	IsopropanolRuminobacter	4	154	202	0,9469	6	0,5848	0,9943	0,0041	DUO	-42
1,3-Dihydroxyacetone	Ruminobacter	Metabolite	Bacteria	1,3-DihydroxyacetoneRuminobacter	6	154	202	0,9458	6	0,5778	0,9942	0,0043	DUO	-42
1,3-Dihydroxyacetone	Ruminobacter	Metabolite	Bacteria	1,3-DihydroxyacetoneRuminobacter	6	154	202	0,9012	7	0,4608	0,9855	0,0056	DUO	24hC
Isopropanol	Ruminobacter	Metabolite	Bacteria	IsopropanolRuminobacter	4	154	202	0,8268	7	0,1955	0,9736	0,0218	DUO	12hL
1,3-Dihydroxyacetone	Ruminobacter	Metabolite	Bacteria	1,3-DihydroxyacetoneRuminobacter	6	154	202	0,9288	5	0,2579	0,9954	0,0225	DUO	12hC
1,3-Dihydroxyacetone	Ruminobacter	Metabolite	Bacteria	1,3-DihydroxyacetoneRuminobacter	6	154	202	0,8212	7	0,1785	0,9727	0,0235	DUO	12hL
1,3-Dihydroxyacetone	Ruminobacter	Metabolite	Bacteria	1,3-DihydroxyacetoneRuminobacter	6	154	202	0,8600	6	0,1604	0,9845	0,0280	RUM	+118
Isopropanol	Ruminobacter	Metabolite	Bacteria	IsopropanolRuminobacter	4	154	202	0,8921	5	0,0463	0,9929	0,0418	RUM	24hL
Lactate	Ruminobacter	Metabolite	Bacteria	LactateRuminobacter	4	153	202	0,9869	5	0,8087	0,9992	0,0018	RUM	24hL
Lactate	Ruminobacter	Metabolite	Bacteria	LactateRuminobacter	4	153	202	0,9454	6	0,5751	0,9942	0,0044	DUO	-42
Lactate	Ruminobacter	Metabolite	Bacteria	LactateRuminobacter	4	153	202	0,8126	7	0,1534	0,9713	0,0263	DUO	12hL
Lactate	Ruminobacter	Metabolite	Bacteria	LactateRuminobacter	4	153	202	0,8433	6	0,1005	0,9825	0,0349	DUO	+126
Serine	Ruminobacter	Metabolite	Bacteria	SerineRuminobacter	4	152	202	0,9656	6	0,7122	0,9964	0,0018	DUO	+126
Serine	Ruminobacter	Metabolite	Bacteria	SerineRuminobacter	4	152	202	0,9462	6	0,5798	0,9943	0,0043	DUO	-42
Serine	Ruminobacter	Metabolite	Bacteria	SerineRuminobacter	4	152	202	0,8653	7	0,3223	0,9799	0,0119	DUO	12hL
Serine	Ruminobacter	Metabolite	Bacteria	SerineRuminobacter	4	152	202	0,8654	6	0,1810	0,9851	0,0259	RUM	+118
Uracil	Ruminobacter	Metabolite	Bacteria	UracilRuminobacter	3	143	202	0,9962	6	0,9644	0,9996	<,0001	DUO	+126
Cadaverine	Ruminobacter	Metabolite	Bacteria	CadaverineRuminobacter	5	143	202	0,9609	6	0,6781	0,9959	0,0023	DUO	-42
Cadaverine	Ruminobacter	Metabolite	Bacteria	CadaverineRuminobacter	5	143	202	0,9828	5	0,7564	0,9989	0,0027	RUM	24hL
Uracil	Ruminobacter	Metabolite	Bacteria	UracilRuminobacter	3	143	202	0,9360	6	0,5179	0,9932	0,0060	DUO	-42
Cadaverine	Ruminobacter	Metabolite	Bacteria	CadaverineRuminobacter	5	143	202	0,9325	6	0,4972	0,9928	0,0067	DUO	+126
Cadaverine	Ruminobacter	Metabolite	Bacteria	CadaverineRuminobacter	5	143	202	0,9042	6	0,3481	0,9896	0,0133	RUM	+118
Uracil	Ruminobacter	Metabolite	Bacteria	UracilRuminobacter	3	143	202	0,8438	7	0,2488	0,9764	0,0170	DUO	12hL
Cadaverine	Ruminobacter	Metabolite	Bacteria	CadaverineRuminobacter	5	143	202	0,8126	7	0,1534	0,9713	0,0263	DUO	12hL
Succinate	Ruminobacter	Metabolite	Bacteria	SuccinateRuminobacter	4	140	202	0,9923	6	0,9285	0,9992	<,0001	DUO	+126
Succinate	Ruminobacter	Metabolite	Bacteria	SuccinateRuminobacter	4	140	202	0,9850	5	0,7838	0,9991	0,0022	DUO	12hC
Allantoin	Ruminobacter	Metabolite	Bacteria	AllantoinRuminobacter	2	140	202	0,9477	6	0,5900	0,9944	0,0040	RUM	24hC
Succinate	Ruminobacter	Metabolite	Bacteria	SuccinateRuminobacter	4	140	202	0,9440	6	0,5661	0,9940	0,0046	DUO	-42
Lysine	Ruminobacter	Metabolite	Bacteria	LysineRuminobacter	4	140	202	0,9402	6	0,5430	0,9936	0,0053	DUO	-42
Lysine	Ruminobacter	Metabolite	Bacteria	LysineRuminobacter	4	140	202	0,9693	5	0,6012	0,9981	0,0064	RUM	24hL
Lysine	Ruminobacter	Metabolite	Bacteria	LysineRuminobacter	4	140	202	0,9110	6	0,3816	0,9904	0,0115	DUO	+126
Succinate	Ruminobacter	Metabolite	Bacteria	SuccinateRuminobacter	4	140	202	0,8454	7	0,2540	0,9767	0,0166	DUO	12hL
Lysine	Ruminobacter	Metabolite	Bacteria	LysineRuminobacter	4	140	202	0,8421	7	0,2435	0,9761	0,0174	DUO	12hL
Allantoin	Ruminobacter	Metabolite	Bacteria	AllantoinRuminobacter	2	140	202	0,8974	5	0,0729	0,9933	0,0388	DUO	12hC
4-Hydroxybutyrate	Ruminobacter	Metabolite	Bacteria	4-HydroxybutyrateRuminobacter	4	139	202	0,9450	6	0,5727	0,9941	0,0044	DUO	-42
Trimethylamine	Ruminobacter	Metabolite	Bacteria	TrimethylamineRuminobacter	2	139	202	0,9297	6	0,4810	0,9924	0,0072	DUO	-42
4-Hydroxybutyrate	Ruminobacter	Metabolite	Bacteria	4-HydroxybutyrateRuminobacter	4	139	202	0,8557	7	0,2886	0,9783	0,0140	DUO	12hL
Trimethylamine	Ruminobacter	Metabolite	Bacteria	TrimethylamineRuminobacter	2	139	202	0,9463	5	0,3878	0,9966	0,0148	RUM	24hL
4-Hydroxybutyrate	Ruminobacter	Metabolite	Bacteria	4-HydroxybutyrateRuminobacter	4	139	202	0,8322	6	0,0636	0,9811	0,0399	DUO	+126
4-Hydroxybutyrate	Ruminobacter	Metabolite	Bacteria	4-HydroxybutyrateRuminobacter	4	139	202	0,8259	6	0,0434	0,9804	0,0428	RUM	+118
Pimelate	Ruminobacter	Metabolite	Bacteria	PimelateRuminobacter	5	137	202	0,9256	6	0,4583	0,9920	0,0081	DUO	-42
Pimelate	Ruminobacter	Metabolite	Bacteria	PimelateRuminobacter	5	137	202	-0,8860	6	-0,9875	-0,2651	0,0187	RUM	72hL
Pimelate	Ruminobacter	Metabolite	Bacteria	PimelateRuminobacter	5	137	202	-0,8791	6	-0,9867	-0,2359	0,0210	RUM	24hC
Pimelate	Ruminobacter	Metabolite	Bacteria	PimelateRuminobacter	5	137	202	0,9670	4	0,0842	0,9993	0,0330	DUO	+118
Pimelate	Ruminobacter	Metabolite	Bacteria	PimelateRuminobacter	5	137	202	0,7843	7	0,0762	0,9665	0,0368	DUO	12hL
N-nitrosodimethylamine	Ruminobacter	Metabolite	Bacteria	N-nitrosodimethylamineRuminobacter	4	136	202	0,9435	6	0,5629	0,9940	0,0047	DUO	-42
N-nitrosodimethylamine	Ruminobacter	Metabolite	Bacteria	N-nitrosodimethylamineRuminobacter	4	136	202	0,8586	7	0,2986	0,9788	0,0134	DUO	12hL
N-nitrosodimethylamine	Ruminobacter	Metabolite	Bacteria	N-nitrosodimethylamineRuminobacter	4	136	202	0,8841	6	0,2569	0,9873	0,0194	DUO	+126
N-nitrosodimethylamine	Ruminobacter	Metabolite	Bacteria	N-nitrosodimethylamineRuminobacter	4	136	202	0,8828	6	0,2512	0,9871	0,0198	RUM	72hC
Phenylacetate	Ruminobacter	Metabolite	Bacteria	PhenylacetateRuminobacter	3	134	202	0,9311	6	0,4891	0,9926	0,0070	DUO	-42
Phenylacetate	Ruminobacter	Metabolite	Bacteria	PhenylacetateRuminobacter	3	134	202	0,9249	6	0,4544	0,9919	0,0082	DUO	+126
Phenylacetate	Ruminobacter	Metabolite	Bacteria	PhenylacetateRuminobacter	3	134	202	0,8303	7	0,2061	0,9742	0,0207	DUO	12hL
Caffeine	Ruminobacter	Metabolite	Bacteria	CaffeineRuminobacter	3	133	202	0,9991	6	0,9909	0,9999	<,0001	DUO	+126
Hypoxanthine	Ruminobacter	Metabolite	Bacteria	HypoxanthineRuminobacter	3	133	202	0,9967	6	0,9684	0,9997	<,0001	DUO	+126
Caffeine	Ruminobacter	Metabolite	Bacteria	CaffeineRuminobacter	3	133	202	0,9468	6	0,5836	0,9943	0,0042	DUO	-42
Hypoxanthine	Ruminobacter	Metabolite	Bacteria	HypoxanthineRuminobacter	3	133	202	0,9451	6	0,5733	0,9941	0,0044	DUO	-42
Valerate	Ruminobacter	Metabolite	Bacteria	ValerateRuminobacter	5	133	202	0,9247	6	0,4534	0,9919	0,0083	DUO	-42
Caffeine	Ruminobacter	Metabolite	Bacteria	CaffeineRuminobacter	3	133	202	0,8566	7	0,2917	0,9785	0,0138	DUO	12hL
Hypoxanthine	Ruminobacter	Metabolite	Bacteria	HypoxanthineRuminobacter	3	133	202	0,8536	7	0,2813	0,9780	0,0145	DUO	12hL
Valerate	Ruminobacter	Metabolite	Bacteria	ValerateRuminobacter	5	133	202	-0,8800	6	-0,9868	-0,2394	0,0207	RUM	72hL
Valerate	Ruminobacter	Metabolite	Bacteria	ValerateRuminobacter	5	133	202	0,8036	7	0,1280	0,9698	0,0294	DUO	12hL
Valerate	Ruminobacter	Metabolite	Bacteria	ValerateRuminobacter	5	133	202	-0,8486	6	-0,9831	-0,1189	0,0327	RUM	24hC
Valerate	Ruminobacter	Metabolite	Bacteria	ValerateRuminobacter	5	133	202	0,9565	4	-0,0569	0,9991	0,0435	DUO	+118
Acetone	Ruminobacter	Metabolite	Bacteria	AcetoneRuminobacter	4	132	202	0,9486	6	0,5955	0,9945	0,0039	DUO	+126
Acetone	Ruminobacter	Metabolite	Bacteria	AcetoneRuminobacter	4	132	202	0,9310	6	0,4884	0,9926	0,0070	DUO	-42
Acetone	Ruminobacter	Metabolite	Bacteria	AcetoneRuminobacter	4	132	202	0,9885	4	0,5497	0,9998	0,0115	DUO	+118
Acetone	Ruminobacter	Metabolite	Bacteria	AcetoneRuminobacter	4	132	202	0,8231	7	0,1843	0,9730	0,0229	DUO	12hL
Benzoate	Ruminobacter	Metabolite	Bacteria	BenzoateRuminobacter	4	131	202	0,9948	6	0,9510	0,9995	<,0001	DUO	+126
Valine	Ruminobacter	Metabolite	Bacteria	ValineRuminobacter	3	131	202	0,9424	6	0,5560	0,9938	0,0049	DUO	-42
Benzoate	Ruminobacter	Metabolite	Bacteria	BenzoateRuminobacter	4	131	202	0,9412	6	0,5491	0,9937	0,0051	DUO	-42
Valine	Ruminobacter	Metabolite	Bacteria	ValineRuminobacter	3	131	202	0,9025	6	0,3397	0,9894	0,0138	DUO	+126
Benzoate	Ruminobacter	Metabolite	Bacteria	BenzoateRuminobacter	4	131	202	0,8546	7	0,2849	0,9782	0,0143	DUO	12hL
Valine	Ruminobacter	Metabolite	Bacteria	ValineRuminobacter	3	131	202	0,8441	7	0,2500	0,9765	0,0169	DUO	12hL
Benzoate	Ruminobacter	Metabolite	Bacteria	BenzoateRuminobacter	4	131	202	0,8862	6	0,2658	0,9875	0,0187	DUO	-14
Imidazole	Ruminobacter	Metabolite	Bacteria	ImidazoleRuminobacter	4	130	202	0,9988	6	0,9890	0,9999	<,0001	DUO	+126
Alanine	Ruminobacter	Metabolite	Bacteria	AlanineRuminobacter	4	130	202	0,9960	5	0,9378	0,9997	0,0003	RUM	24hL
Imidazole	Ruminobacter	Metabolite	Bacteria	ImidazoleRuminobacter	4	130	202	-0,9837	6	-0,9983	-0,8534	0,0004	RUM	12hL
Alanine	Ruminobacter	Metabolite	Bacteria	AlanineRuminobacter	4	130	202	0,9980	4	0,9020	10000	0,0020	DUO	+118
Carnitine	Ruminobacter	Metabolite	Bacteria	CarnitineRuminobacter	3	130	202	0,9464	6	0,5816	0,9943	0,0042	DUO	-42
Glycerol	Ruminobacter	Metabolite	Bacteria	GlycerolRuminobacter	4	130	202	0,9455	6	0,5756	0,9942	0,0044	DUO	-42
Imidazole	Ruminobacter	Metabolite	Bacteria	ImidazoleRuminobacter	4	130	202	0,9434	6	0,5623	0,9940	0,0047	DUO	-42
Leucine	Ruminobacter	Metabolite	Bacteria	LeucineRuminobacter	2	130	202	0,9438	6	0,5647	0,9940	0,0047	DUO	-42
Glycerol	Ruminobacter	Metabolite	Bacteria	GlycerolRuminobacter	4	130	202	0,9427	6	0,5583	0,9939	0,0048	DUO	+126
Alanine	Ruminobacter	Metabolite	Bacteria	AlanineRuminobacter	4	130	202	0,9340	6	0,5057	0,9929	0,0064	DUO	-42
Glycerol	Ruminobacter	Metabolite	Bacteria	GlycerolRuminobacter	4	130	202	0,8569	7	0,2927	0,9785	0,0138	DUO	12hL
Imidazole	Ruminobacter	Metabolite	Bacteria	ImidazoleRuminobacter	4	130	202	0,8569	7	0,2927	0,9785	0,0138	DUO	12hL
Leucine	Ruminobacter	Metabolite	Bacteria	LeucineRuminobacter	2	130	202	0,9484	5	0,4048	0,9967	0,0140	RUM	24hL
Glycerol	Ruminobacter	Metabolite	Bacteria	GlycerolRuminobacter	4	130	202	0,9016	6	0,3354	0,9893	0,0141	RUM	+118
Carnitine	Ruminobacter	Metabolite	Bacteria	CarnitineRuminobacter	3	130	202	0,9771	4	0,2635	0,9995	0,0229	DUO	+118
Carnitine	Ruminobacter	Metabolite	Bacteria	CarnitineRuminobacter	3	130	202	0,8200	7	0,1750	0,9725	0,0239	DUO	12hL
Alanine	Ruminobacter	Metabolite	Bacteria	AlanineRuminobacter	4	130	202	0,7624	7	0,0219	0,9627	0,0463	DUO	12hL
Ethanol	Ruminobacter	Metabolite	Bacteria	EthanolRuminobacter	3	129	202	0,9695	6	0,7410	0,9968	0,0014	DUO	+126
Ethanol	Ruminobacter	Metabolite	Bacteria	EthanolRuminobacter	3	129	202	0,9475	6	0,5887	0,9944	0,0041	DUO	-42
Ethanol	Ruminobacter	Metabolite	Bacteria	EthanolRuminobacter	3	129	202	0,8472	7	0,2599	0,9770	0,0161	DUO	12hL
2-Phenylpropionate	Ruminobacter	Metabolite	Bacteria	2-PhenylpropionateRuminobacter	4	127	202	0,9617	6	0,6839	0,9959	0,0022	DUO	+126
2-Phenylpropionate	Ruminobacter	Metabolite	Bacteria	2-PhenylpropionateRuminobacter	4	127	202	0,9464	6	0,5813	0,9943	0,0042	DUO	-42
N-Phenylacetylglycine	Ruminobacter	Metabolite	Bacteria	N-PhenylacetylglycineRuminobacter	3	127	202	0,9454	6	0,5752	0,9942	0,0044	DUO	-42
N-Phenylacetylglycine	Ruminobacter	Metabolite	Bacteria	N-PhenylacetylglycineRuminobacter	3	127	202	0,9296	6	0,4807	0,9924	0,0073	DUO	+126
N-Phenylacetylglycine	Ruminobacter	Metabolite	Bacteria	N-PhenylacetylglycineRuminobacter	3	127	202	0,8476	7	0,2614	0,9770	0,0160	DUO	12hL
2-Phenylpropionate	Ruminobacter	Metabolite	Bacteria	2-PhenylpropionateRuminobacter	4	127	202	0,8419	7	0,2426	0,9761	0,0175	DUO	12hL
2-Phenylpropionate	Ruminobacter	Metabolite	Bacteria	2-PhenylpropionateRuminobacter	4	127	202	-0,8182	7	-0,9722	-0,1698	0,0245	DUO	+100
Phenylalanine	Ruminobacter	Metabolite	Bacteria	PhenylalanineRuminobacter	4	126	202	0,9561	6	0,6451	0,9953	0,0028	DUO	-42
Butyrate	Ruminobacter	Metabolite	Bacteria	ButyrateRuminobacter	4	126	202	0,9280	6	0,4717	0,9923	0,0076	DUO	-42
Phenylalanine	Ruminobacter	Metabolite	Bacteria	PhenylalanineRuminobacter	4	126	202	0,9237	6	0,4481	0,9918	0,0085	DUO	+126
Butyrate	Ruminobacter	Metabolite	Bacteria	ButyrateRuminobacter	4	126	202	-0,9192	6	-0,9913	-0,4237	0,0095	RUM	+126
Phenylalanine	Ruminobacter	Metabolite	Bacteria	PhenylalanineRuminobacter	4	126	202	0,8555	7	0,2880	0,9783	0,0141	DUO	12hL
Phenylalanine	Ruminobacter	Metabolite	Bacteria	PhenylalanineRuminobacter	4	126	202	-0,9822	4	-0,9996	-0,3771	0,0178	DUO	72hL
Butyrate	Ruminobacter	Metabolite	Bacteria	ButyrateRuminobacter	4	126	202	-0,8489	6	-0,9831	-0,1199	0,0325	RUM	72hL
Butyrate	Ruminobacter	Metabolite	Bacteria	ButyrateRuminobacter	4	126	202	0,7808	7	0,0674	0,9659	0,0382	DUO	12hL
Ferulate	Ruminobacter	Metabolite	Bacteria	FerulateRuminobacter	3	124	202	0,9636	6	0,6974	0,9961	0,0020	DUO	+126
Maltose	Ruminobacter	Metabolite	Bacteria	MaltoseRuminobacter	2	124	202	0,9365	6	0,5207	0,9932	0,0059	DUO	-42
Ferulate	Ruminobacter	Metabolite	Bacteria	FerulateRuminobacter	3	124	202	0,9239	6	0,4492	0,9918	0,0085	DUO	-42
Maltose	Ruminobacter	Metabolite	Bacteria	MaltoseRuminobacter	2	124	202	0,8575	7	0,2947	0,9786	0,0136	DUO	12hL
Ferulate	Ruminobacter	Metabolite	Bacteria	FerulateRuminobacter	3	124	202	0,8356	7	0,2226	0,9751	0,0192	DUO	12hL
Nicotinate	Ruminobacter	Metabolite	Bacteria	NicotinateRuminobacter	3	123	202	0,9988	6	0,9882	0,9999	<,0001	DUO	+126
Nicotinate	Ruminobacter	Metabolite	Bacteria	NicotinateRuminobacter	3	123	202	0,9460	6	0,5791	0,9942	0,0043	DUO	-42
Nicotinate	Ruminobacter	Metabolite	Bacteria	NicotinateRuminobacter	3	123	202	0,8606	7	0,3055	0,9791	0,0129	DUO	12hL
3-Phenylpropionate	Ruminobacter	Metabolite	Bacteria	3-PhenylpropionateRuminobacter	4	121	202	0,9931	6	0,9358	0,9993	<,0001	DUO	+126
3-Phenylpropionate	Ruminobacter	Metabolite	Bacteria	3-PhenylpropionateRuminobacter	4	121	202	0,9471	6	0,5857	0,9944	0,0041	DUO	-42
3-Phenylpropionate	Ruminobacter	Metabolite	Bacteria	3-PhenylpropionateRuminobacter	4	121	202	0,9675	5	0,5821	0,9979	0,0070	DUO	12hC
3-Phenylpropionate	Ruminobacter	Metabolite	Bacteria	3-PhenylpropionateRuminobacter	4	121	202	0,8546	7	0,2849	0,9782	0,0143	DUO	12hL
Methylamine	Ruminobacter	Metabolite	Bacteria	MethylamineRuminobacter	5	120	202	0,9524	6	0,6203	0,9949	0,0033	DUO	-42
Methylamine	Ruminobacter	Metabolite	Bacteria	MethylamineRuminobacter	5	120	202	0,9792	5	0,7123	0,9987	0,0036	RUM	24hL
Methylamine	Ruminobacter	Metabolite	Bacteria	MethylamineRuminobacter	5	120	202	0,8717	7	0,3453	0,9809	0,0106	DUO	12hL
Methylamine	Ruminobacter	Metabolite	Bacteria	MethylamineRuminobacter	5	120	202	-0,8909	6	-0,9881	-0,2865	0,0172	RUM	+126
Methylamine	Ruminobacter	Metabolite	Bacteria	MethylamineRuminobacter	5	120	202	0,8796	6	0,2379	0,9868	0,0209	DUO	+126
Isovalerate	Ruminobacter	Metabolite	Bacteria	IsovalerateRuminobacter	1	119	202	0,9705	6	0,7480	0,9969	0,0013	DUO	-42
Methanol	Ruminobacter	Metabolite	Bacteria	MethanolRuminobacter	4	118	202	0,9982	6	0,9827	0,9998	<,0001	DUO	+126
Methanol	Ruminobacter	Metabolite	Bacteria	MethanolRuminobacter	4	118	202	0,9471	6	0,5861	0,9944	0,0041	DUO	-42
Methanol	Ruminobacter	Metabolite	Bacteria	MethanolRuminobacter	4	118	202	0,8579	7	0,2963	0,9787	0,0135	DUO	12hL
Methanol	Ruminobacter	Metabolite	Bacteria	MethanolRuminobacter	4	118	202	-0,9025	5	-0,9936	-0,0994	0,0360	DUO	72hC
Histidine	Ruminobacter	Metabolite	Bacteria	HistidineRuminobacter	4	116	202	0,9984	6	0,9847	0,9998	<,0001	DUO	+126
Tyrosine	Ruminobacter	Metabolite	Bacteria	TyrosineRuminobacter	4	116	202	0,9481	6	0,5925	0,9945	0,0040	DUO	-42
Histidine	Ruminobacter	Metabolite	Bacteria	HistidineRuminobacter	4	116	202	0,9461	6	0,5796	0,9943	0,0043	DUO	-42
Tyrosine	Ruminobacter	Metabolite	Bacteria	TyrosineRuminobacter	4	116	202	0,9251	6	0,4554	0,9919	0,0082	DUO	+126
Histidine	Ruminobacter	Metabolite	Bacteria	HistidineRuminobacter	4	116	202	0,8609	7	0,3066	0,9792	0,0128	DUO	12hL
Tyrosine	Ruminobacter	Metabolite	Bacteria	TyrosineRuminobacter	4	116	202	0,8570	7	0,2930	0,9785	0,0137	DUO	12hL
Tyrosine	Ruminobacter	Metabolite	Bacteria	TyrosineRuminobacter	4	116	202	0,8492	6	0,1211	0,9832	0,0324	RUM	24hC
Histidine	Ruminobacter	Metabolite	Bacteria	HistidineRuminobacter	4	116	202	0,8905	5	0,0385	0,9928	0,0428	DUO	12hC
Acetoacetate	Ruminobacter	Metabolite	Bacteria	AcetoacetateRuminobacter	4	115	202	0,9967	4	0,8449	0,9999	0,0033	DUO	+118
Acetoacetate	Ruminobacter	Metabolite	Bacteria	AcetoacetateRuminobacter	4	115	202	0,9349	6	0,5115	0,9930	0,0062	DUO	-42
Acetoacetate	Ruminobacter	Metabolite	Bacteria	AcetoacetateRuminobacter	4	115	202	0,8190	7	0,1721	0,9724	0,0242	DUO	12hL
Acetoacetate	Ruminobacter	Metabolite	Bacteria	AcetoacetateRuminobacter	4	115	202	0,8622	6	0,1686	0,9847	0,0272	RUM	72hC
Xanthine	Ruminobacter	Metabolite	Bacteria	XanthineRuminobacter	3	114	202	0,9922	6	0,9271	0,9992	<,0001	DUO	+126
Glutamate	Ruminobacter	Metabolite	Bacteria	GlutamateRuminobacter	4	114	202	0,9414	6	0,5499	0,9937	0,0051	DUO	-42
Xanthine	Ruminobacter	Metabolite	Bacteria	XanthineRuminobacter	3	114	202	0,9364	6	0,5200	0,9932	0,0059	DUO	-42
Glutamate	Ruminobacter	Metabolite	Bacteria	GlutamateRuminobacter	4	114	202	0,9285	6	0,4747	0,9923	0,0075	DUO	+126
Xanthine	Ruminobacter	Metabolite	Bacteria	XanthineRuminobacter	3	114	202	0,8555	7	0,2879	0,9783	0,0141	DUO	12hL
Glutamate	Ruminobacter	Metabolite	Bacteria	GlutamateRuminobacter	4	114	202	0,8179	7	0,1688	0,9722	0,0246	DUO	12hL
Glutamate	Ruminobacter	Metabolite	Bacteria	GlutamateRuminobacter	4	114	202	0,7600	7	0,0162	0,9623	0,0474	DUO	24hC
3-Hydroxybutyrate	Ruminobacter	Metabolite	Bacteria	3-HydroxybutyrateRuminobacter	4	112	202	0,9389	6	0,5351	0,9935	0,0055	DUO	+126
3-Hydroxybutyrate	Ruminobacter	Metabolite	Bacteria	3-HydroxybutyrateRuminobacter	4	112	202	0,9299	6	0,4821	0,9925	0,0072	DUO	-42
3-Hydroxybutyrate	Ruminobacter	Metabolite	Bacteria	3-HydroxybutyrateRuminobacter	4	112	202	0,9505	5	0,4231	0,9968	0,0131	DUO	72hC
3-Hydroxybutyrate	Ruminobacter	Metabolite	Bacteria	3-HydroxybutyrateRuminobacter	4	112	202	0,8370	7	0,2271	0,9753	0,0188	DUO	12hL
Ornithine	Ruminobacter	Metabolite	Bacteria	OrnithineRuminobacter	3	110	202	0,9417	6	0,5521	0,9938	0,0050	DUO	+126
Glucose	Ruminobacter	Metabolite	Bacteria	GlucoseRuminobacter	3	110	202	0,9289	6	0,4769	0,9924	0,0074	DUO	-42
Glucose	Ruminobacter	Metabolite	Bacteria	GlucoseRuminobacter	3	110	202	0,8576	7	0,2952	0,9786	0,0136	DUO	12hL
Ornithine	Ruminobacter	Metabolite	Bacteria	OrnithineRuminobacter	3	110	202	0,9023	6	0,3387	0,9894	0,0139	DUO	-42
Ornithine	Ruminobacter	Metabolite	Bacteria	OrnithineRuminobacter	3	110	202	0,9721	4	0,1674	0,9994	0,0279	DUO	+118
Glucose	Ruminobacter	Metabolite	Bacteria	GlucoseRuminobacter	3	110	202	0,8453	6	0,1075	0,9827	0,0340	DUO	+126
Adipate	Ruminobacter	Metabolite	Bacteria	AdipateRuminobacter	5	109	202	0,9993	4	0,9636	10000	0,0007	DUO	+118
Isoleucine	Ruminobacter	Metabolite	Bacteria	IsoleucineRuminobacter	2	109	202	0,9507	6	0,6093	0,9948	0,0036	DUO	-42
Adipate	Ruminobacter	Metabolite	Bacteria	AdipateRuminobacter	5	109	202	-0,9360	6	-0,9931	-0,5175	0,0060	RUM	+126
Propionate	Ruminobacter	Metabolite	Bacteria	PropionateRuminobacter	2	109	202	0,9268	6	0,4650	0,9921	0,0078	DUO	-42
Adipate	Ruminobacter	Metabolite	Bacteria	AdipateRuminobacter	5	109	202	0,9264	6	0,4625	0,9921	0,0079	DUO	-42
Adipate	Ruminobacter	Metabolite	Bacteria	AdipateRuminobacter	5	109	202	0,8386	7	0,2321	0,9756	0,0184	DUO	12hL
Adipate	Ruminobacter	Metabolite	Bacteria	AdipateRuminobacter	5	109	202	-0,8766	6	-0,9864	-0,2252	0,0219	RUM	72hL
Isoleucine	Ruminobacter	Metabolite	Bacteria	IsoleucineRuminobacter	2	109	202	0,7788	7	0,0623	0,9656	0,0391	DUO	12hL
Propionate	Ruminobacter	Metabolite	Bacteria	PropionateRuminobacter	2	109	202	0,9545	4	-0,0798	0,9991	0,0455	DUO	+118
Isobutyrate	Ruminobacter	Metabolite	Bacteria	IsobutyrateRuminobacter	1	103	202	0,9567	6	0,6490	0,9954	0,0028	DUO	-42
3-Hydroxyphenylacetate	Ruminobacter	Metabolite	Bacteria	3-HydroxyphenylacetateRuminobacter	3	101	202	0,9792	6	0,8164	0,9978	0,0006	DUO	+126
3-Hydroxyphenylacetate	Ruminobacter	Metabolite	Bacteria	3-HydroxyphenylacetateRuminobacter	3	101	202	0,9295	6	0,4798	0,9924	0,0073	DUO	-42
3-Hydroxyphenylacetate	Ruminobacter	Metabolite	Bacteria	3-HydroxyphenylacetateRuminobacter	3	101	202	0,8578	7	0,2959	0,9787	0,0135	DUO	12hL
Urea	Ruminobacter	Metabolite	Bacteria	UreaRuminobacter	1	65	202	0,9411	6	0,5486	0,9937	0,0051	RUM	24hC
Formate	Campylobacter	Metabolite	Bacteria	FormateCampylobacter	3	178	177	0,9997	6	0,9967	10000	<,0001	DUO	-42
Formate	Campylobacter	Metabolite	Bacteria	FormateCampylobacter	3	178	177	0,9990	7	0,9927	0,9999	<,0001	DUO	12hL
Formate	Campylobacter	Metabolite	Bacteria	FormateCampylobacter	3	178	177	0,9994	6	0,9945	0,9999	<,0001	DUO	+126
Choline	Campylobacter	Metabolite	Bacteria	CholineCampylobacter	3	173	177	0,9998	6	0,9984	10000	<,0001	DUO	-42
Choline	Campylobacter	Metabolite	Bacteria	CholineCampylobacter	3	173	177	0,9784	7	0,8563	0,9969	0,0001	DUO	12hL
Choline	Campylobacter	Metabolite	Bacteria	CholineCampylobacter	3	173	177	0,8869	6	0,2689	0,9876	0,0185	DUO	+126
Fumarate	Campylobacter	Metabolite	Bacteria	FumarateCampylobacter	4	166	177	0,9845	7	0,8946	0,9978	<,0001	DUO	12hL
Fumarate	Campylobacter	Metabolite	Bacteria	FumarateCampylobacter	4	166	177	10000	4	0,9996	10000	<,0001	DUO	72hL
Fumarate	Campylobacter	Metabolite	Bacteria	FumarateCampylobacter	4	166	177	0,9985	6	0,9853	0,9998	<,0001	DUO	+126
Fumarate	Campylobacter	Metabolite	Bacteria	FumarateCampylobacter	4	166	177	0,9873	6	0,8845	0,9987	0,0002	DUO	-42
Proline	Campylobacter	Metabolite	Bacteria	ProlineCampylobacter	3	165	177	10000	6	0,9999	10000	<,0001	DUO	-42
Proline	Campylobacter	Metabolite	Bacteria	ProlineCampylobacter	3	165	177	0,9998	7	0,9985	10000	<,0001	DUO	12hL
Proline	Campylobacter	Metabolite	Bacteria	ProlineCampylobacter	3	165	177	0,9999	6	0,9993	10000	<,0001	DUO	+126
Aspartate	Campylobacter	Metabolite	Bacteria	AspartateCampylobacter	4	159	177	0,9996	6	0,9963	10000	<,0001	DUO	-42
Aspartate	Campylobacter	Metabolite	Bacteria	AspartateCampylobacter	4	159	177	0,9981	7	0,9863	0,9997	<,0001	DUO	12hL
Aspartate	Campylobacter	Metabolite	Bacteria	AspartateCampylobacter	4	159	177	0,9671	5	0,5784	0,9979	0,0071	RUM	24hL
Aspartate	Campylobacter	Metabolite	Bacteria	AspartateCampylobacter	4	159	177	0,9275	6	0,4691	0,9922	0,0077	DUO	+126
Ribose	Campylobacter	Metabolite	Bacteria	RiboseCampylobacter	5	158	177	0,9998	6	0,9979	10000	<,0001	DUO	-42
Ribose	Campylobacter	Metabolite	Bacteria	RiboseCampylobacter	5	158	177	0,9996	7	0,9968	0,9999	<,0001	DUO	12hL
Ribose	Campylobacter	Metabolite	Bacteria	RiboseCampylobacter	5	158	177	0,9887	6	0,8964	0,9988	0,0002	DUO	+126
Ribose	Campylobacter	Metabolite	Bacteria	RiboseCampylobacter	5	158	177	0,9845	5	0,7778	0,9990	0,0023	RUM	24hL
Ribose	Campylobacter	Metabolite	Bacteria	RiboseCampylobacter	5	158	177	0,9807	5	0,7310	0,9988	0,0032	DUO	12hC
1,3-Dihydroxyacetone	Campylobacter	Metabolite	Bacteria	1,3-DihydroxyacetoneCampylobacter	4	154	177	0,9999	6	0,9995	10000	<,0001	DUO	-42
Isopropanol	Campylobacter	Metabolite	Bacteria	IsopropanolCampylobacter	4	154	177	0,9990	6	0,9906	0,9999	<,0001	DUO	-42
1,3-Dihydroxyacetone	Campylobacter	Metabolite	Bacteria	1,3-DihydroxyacetoneCampylobacter	4	154	177	0,9888	7	0,9229	0,9984	<,0001	DUO	12hL
Isopropanol	Campylobacter	Metabolite	Bacteria	IsopropanolCampylobacter	4	154	177	0,9954	7	0,9680	0,9994	<,0001	DUO	12hL
Isopropanol	Campylobacter	Metabolite	Bacteria	IsopropanolCampylobacter	4	154	177	0,9925	6	0,9306	0,9992	<,0001	DUO	+126
1,3-Dihydroxyacetone	Campylobacter	Metabolite	Bacteria	1,3-DihydroxyacetoneCampylobacter	4	154	177	0,9857	6	0,8704	0,9985	0,0003	DUO	+126
Isopropanol	Campylobacter	Metabolite	Bacteria	IsopropanolCampylobacter	4	154	177	0,9330	5	0,2868	0,9957	0,0206	RUM	24hL
1,3-Dihydroxyacetone	Campylobacter	Metabolite	Bacteria	1,3-DihydroxyacetoneCampylobacter	4	154	177	0,9198	5	0,1992	0,9948	0,0269	DUO	12hC
Lactate	Campylobacter	Metabolite	Bacteria	LactateCampylobacter	4	153	177	0,9980	6	0,9807	0,9998	<,0001	DUO	-42
Lactate	Campylobacter	Metabolite	Bacteria	LactateCampylobacter	4	153	177	0,9882	7	0,9195	0,9983	<,0001	DUO	12hL
Lactate	Campylobacter	Metabolite	Bacteria	LactateCampylobacter	4	153	177	0,9914	5	0,8703	0,9995	0,0010	RUM	24hL
Lactate	Campylobacter	Metabolite	Bacteria	LactateCampylobacter	4	153	177	0,8565	6	0,1476	0,9841	0,0294	DUO	+126
Serine	Campylobacter	Metabolite	Bacteria	SerineCampylobacter	3	152	177	10000	6	0,9998	10000	<,0001	DUO	-42
Serine	Campylobacter	Metabolite	Bacteria	SerineCampylobacter	3	152	177	0,9992	7	0,9946	0,9999	<,0001	DUO	12hL
Serine	Campylobacter	Metabolite	Bacteria	SerineCampylobacter	3	152	177	0,9721	6	0,7604	0,9971	0,0012	DUO	+126
Cadaverine	Campylobacter	Metabolite	Bacteria	CadaverineCampylobacter	4	143	177	0,9950	6	0,9533	0,9995	<,0001	DUO	-42
Uracil	Campylobacter	Metabolite	Bacteria	UracilCampylobacter	4	143	177	0,9959	6	0,9608	0,9996	<,0001	DUO	-42
Cadaverine	Campylobacter	Metabolite	Bacteria	CadaverineCampylobacter	4	143	177	0,9806	7	0,8700	0,9972	<,0001	DUO	12hL
Uracil	Campylobacter	Metabolite	Bacteria	UracilCampylobacter	4	143	177	0,9972	7	0,9800	0,9996	<,0001	DUO	12hL
Uracil	Campylobacter	Metabolite	Bacteria	UracilCampylobacter	4	143	177	0,9984	6	0,9847	0,9998	<,0001	DUO	+126
Cadaverine	Campylobacter	Metabolite	Bacteria	CadaverineCampylobacter	4	143	177	0,9959	5	0,9362	0,9997	0,0003	RUM	24hL
Cadaverine	Campylobacter	Metabolite	Bacteria	CadaverineCampylobacter	4	143	177	0,9398	6	0,5403	0,9936	0,0053	DUO	+126
Uracil	Campylobacter	Metabolite	Bacteria	UracilCampylobacter	4	143	177	0,9849	4	0,4452	0,9997	0,0151	DUO	72hL
Lysine	Campylobacter	Metabolite	Bacteria	LysineCampylobacter	4	140	177	0,9979	6	0,9804	0,9998	<,0001	DUO	-42
Succinate	Campylobacter	Metabolite	Bacteria	SuccinateCampylobacter	5	140	177	0,9997	6	0,9975	10000	<,0001	DUO	-42
Succinate	Campylobacter	Metabolite	Bacteria	SuccinateCampylobacter	5	140	177	0,9955	7	0,9683	0,9994	<,0001	DUO	12hL
Succinate	Campylobacter	Metabolite	Bacteria	SuccinateCampylobacter	5	140	177	0,9953	6	0,9557	0,9995	<,0001	DUO	+126
Lysine	Campylobacter	Metabolite	Bacteria	LysineCampylobacter	4	140	177	0,9805	7	0,8694	0,9972	0,0001	DUO	12hL
Lysine	Campylobacter	Metabolite	Bacteria	LysineCampylobacter	4	140	177	0,9908	5	0,8627	0,9994	0,0011	RUM	24hL
Succinate	Campylobacter	Metabolite	Bacteria	SuccinateCampylobacter	5	140	177	0,9797	5	0,7187	0,9987	0,0035	DUO	12hC
Allantoin	Campylobacter	Metabolite	Bacteria	AllantoinCampylobacter	2	140	177	0,8907	7	0,4181	0,9838	0,0071	DUO	12hL
Lysine	Campylobacter	Metabolite	Bacteria	LysineCampylobacter	4	140	177	0,9192	6	0,4238	0,9913	0,0095	DUO	+126
Succinate	Campylobacter	Metabolite	Bacteria	SuccinateCampylobacter	5	140	177	0,8739	6	0,2142	0,9861	0,0229	RUM	+118
Allantoin	Campylobacter	Metabolite	Bacteria	AllantoinCampylobacter	2	140	177	0,8959	5	0,0650	0,9932	0,0397	DUO	12hC
4-Hydroxybutyrate	Campylobacter	Metabolite	Bacteria	4-HydroxybutyrateCampylobacter	3	139	177	0,9999	6	0,9995	10000	<,0001	DUO	-42
4-Hydroxybutyrate	Campylobacter	Metabolite	Bacteria	4-HydroxybutyrateCampylobacter	3	139	177	0,9989	7	0,9923	0,9998	<,0001	DUO	12hL
4-Hydroxybutyrate	Campylobacter	Metabolite	Bacteria	4-HydroxybutyrateCampylobacter	3	139	177	0,8447	6	0,1054	0,9826	0,0343	DUO	+126
Pimelate	Campylobacter	Metabolite	Bacteria	PimelateCampylobacter	3	137	177	0,9939	6	0,9432	0,9994	<,0001	DUO	-42
Pimelate	Campylobacter	Metabolite	Bacteria	PimelateCampylobacter	3	137	177	0,9534	7	0,7103	0,9933	0,0009	DUO	12hL
Pimelate	Campylobacter	Metabolite	Bacteria	PimelateCampylobacter	3	137	177	0,9862	4	0,4823	0,9997	0,0138	DUO	72hL
N-nitrosodimethylamine	Campylobacter	Metabolite	Bacteria	N-nitrosodimethylamineCampylobacter	3	136	177	0,9990	6	0,9906	0,9999	<,0001	DUO	-42
N-nitrosodimethylamine	Campylobacter	Metabolite	Bacteria	N-nitrosodimethylamineCampylobacter	3	136	177	0,9909	7	0,9369	0,9987	<,0001	DUO	12hL
N-nitrosodimethylamine	Campylobacter	Metabolite	Bacteria	N-nitrosodimethylamineCampylobacter	3	136	177	0,8946	6	0,3031	0,9885	0,0161	DUO	+126
Phenylacetate	Campylobacter	Metabolite	Bacteria	PhenylacetateCampylobacter	3	134	177	0,9938	6	0,9416	0,9993	<,0001	DUO	-42
Phenylacetate	Campylobacter	Metabolite	Bacteria	PhenylacetateCampylobacter	3	134	177	0,9918	7	0,9429	0,9988	<,0001	DUO	12hL
Phenylacetate	Campylobacter	Metabolite	Bacteria	PhenylacetateCampylobacter	3	134	177	0,9336	6	0,5038	0,9929	0,0065	DUO	+126
Caffeine	Campylobacter	Metabolite	Bacteria	CaffeineCampylobacter	4	133	177	10000	6	0,9999	10000	<,0001	DUO	-42
Hypoxanthine	Campylobacter	Metabolite	Bacteria	HypoxanthineCampylobacter	3	133	177	0,9999	6	0,9995	10000	<,0001	DUO	-42
Valerate	Campylobacter	Metabolite	Bacteria	ValerateCampylobacter	2	133	177	0,9930	6	0,9345	0,9993	<,0001	DUO	-42
Caffeine	Campylobacter	Metabolite	Bacteria	CaffeineCampylobacter	4	133	177	0,9993	7	0,9949	0,9999	<,0001	DUO	12hL
Hypoxanthine	Campylobacter	Metabolite	Bacteria	HypoxanthineCampylobacter	3	133	177	0,9992	7	0,9940	0,9999	<,0001	DUO	12hL
Caffeine	Campylobacter	Metabolite	Bacteria	CaffeineCampylobacter	4	133	177	0,9999	6	0,9988	10000	<,0001	DUO	+126
Hypoxanthine	Campylobacter	Metabolite	Bacteria	HypoxanthineCampylobacter	3	133	177	0,9987	6	0,9877	0,9999	<,0001	DUO	+126
Valerate	Campylobacter	Metabolite	Bacteria	ValerateCampylobacter	2	133	177	0,9687	7	0,7972	0,9955	0,0003	DUO	12hL
Caffeine	Campylobacter	Metabolite	Bacteria	CaffeineCampylobacter	4	133	177	0,9545	6	0,6344	0,9952	0,0031	RUM	24hC
Acetone	Campylobacter	Metabolite	Bacteria	AcetoneCampylobacter	3	132	177	0,9975	6	0,9764	0,9997	<,0001	DUO	-42
Acetone	Campylobacter	Metabolite	Bacteria	AcetoneCampylobacter	3	132	177	0,9891	7	0,9250	0,9985	<,0001	DUO	12hL
Acetone	Campylobacter	Metabolite	Bacteria	AcetoneCampylobacter	3	132	177	0,9564	6	0,6474	0,9954	0,0028	DUO	+126
Benzoate	Campylobacter	Metabolite	Bacteria	BenzoateCampylobacter	3	131	177	0,9996	6	0,9958	10000	<,0001	DUO	-42
Valine	Campylobacter	Metabolite	Bacteria	ValineCampylobacter	4	131	177	0,9997	6	0,9972	10000	<,0001	DUO	-42
Benzoate	Campylobacter	Metabolite	Bacteria	BenzoateCampylobacter	3	131	177	0,9994	7	0,9959	0,9999	<,0001	DUO	12hL
Valine	Campylobacter	Metabolite	Bacteria	ValineCampylobacter	4	131	177	0,9928	7	0,9498	0,9990	<,0001	DUO	12hL
Benzoate	Campylobacter	Metabolite	Bacteria	BenzoateCampylobacter	3	131	177	0,9973	6	0,9748	0,9997	<,0001	DUO	+126
Valine	Campylobacter	Metabolite	Bacteria	ValineCampylobacter	4	131	177	0,9116	6	0,3847	0,9904	0,0114	DUO	+126
Valine	Campylobacter	Metabolite	Bacteria	ValineCampylobacter	4	131	177	0,9275	5	0,2491	0,9953	0,0232	RUM	24hL
Alanine	Campylobacter	Metabolite	Bacteria	AlanineCampylobacter	3	130	177	0,9947	6	0,9497	0,9994	<,0001	DUO	-42
Carnitine	Campylobacter	Metabolite	Bacteria	CarnitineCampylobacter	2	130	177	10000	6	0,9997	10000	<,0001	DUO	-42
Glycerol	Campylobacter	Metabolite	Bacteria	GlycerolCampylobacter	3	130	177	10000	6	0,9999	10000	<,0001	DUO	-42
Imidazole	Campylobacter	Metabolite	Bacteria	ImidazoleCampylobacter	4	130	177	0,9999	6	0,9992	10000	<,0001	DUO	-42
Leucine	Campylobacter	Metabolite	Bacteria	LeucineCampylobacter	3	130	177	0,9949	6	0,9518	0,9995	<,0001	DUO	-42
Carnitine	Campylobacter	Metabolite	Bacteria	CarnitineCampylobacter	2	130	177	0,9924	7	0,9475	0,9989	<,0001	DUO	12hL
Glycerol	Campylobacter	Metabolite	Bacteria	GlycerolCampylobacter	3	130	177	0,9998	7	0,9985	10000	<,0001	DUO	12hL
Imidazole	Campylobacter	Metabolite	Bacteria	ImidazoleCampylobacter	4	130	177	0,9997	7	0,9982	10000	<,0001	DUO	12hL
Imidazole	Campylobacter	Metabolite	Bacteria	ImidazoleCampylobacter	4	130	177	0,9999	6	0,9994	10000	<,0001	DUO	+126
Alanine	Campylobacter	Metabolite	Bacteria	AlanineCampylobacter	3	130	177	0,9484	7	0,6835	0,9926	0,0011	DUO	12hL
Leucine	Campylobacter	Metabolite	Bacteria	LeucineCampylobacter	3	130	177	0,9303	7	0,5917	0,9899	0,0024	DUO	12hL
Glycerol	Campylobacter	Metabolite	Bacteria	GlycerolCampylobacter	3	130	177	0,9504	6	0,6073	0,9947	0,0036	DUO	+126
Leucine	Campylobacter	Metabolite	Bacteria	LeucineCampylobacter	3	130	177	0,9698	5	0,6059	0,9981	0,0063	RUM	24hL
Alanine	Campylobacter	Metabolite	Bacteria	AlanineCampylobacter	3	130	177	0,9528	5	0,4429	0,9970	0,0122	RUM	24hL
Imidazole	Campylobacter	Metabolite	Bacteria	ImidazoleCampylobacter	4	130	177	0,9703	4	0,1371	0,9994	0,0297	DUO	72hL
Ethanol	Campylobacter	Metabolite	Bacteria	EthanolCampylobacter	4	129	177	0,9998	6	0,9979	10000	<,0001	DUO	-42
Ethanol	Campylobacter	Metabolite	Bacteria	EthanolCampylobacter	4	129	177	0,9964	7	0,9750	0,9995	<,0001	DUO	12hL
Ethanol	Campylobacter	Metabolite	Bacteria	EthanolCampylobacter	4	129	177	0,9773	6	0,8016	0,9976	0,0008	DUO	+126
Ethanol	Campylobacter	Metabolite	Bacteria	EthanolCampylobacter	4	129	177	0,9206	5	0,2041	0,9948	0,0265	RUM	24hL
2-Phenylpropionate	Campylobacter	Metabolite	Bacteria	2-PhenylpropionateCampylobacter	3	127	177	0,9984	6	0,9843	0,9998	<,0001	DUO	-42
N-Phenylacetylglycine	Campylobacter	Metabolite	Bacteria	N-PhenylacetylglycineCampylobacter	3	127	177	10000	6	0,9999	10000	<,0001	DUO	-42
2-Phenylpropionate	Campylobacter	Metabolite	Bacteria	2-PhenylpropionateCampylobacter	3	127	177	0,9957	7	0,9698	0,9994	<,0001	DUO	12hL
N-Phenylacetylglycine	Campylobacter	Metabolite	Bacteria	N-PhenylacetylglycineCampylobacter	3	127	177	0,9983	7	0,9883	0,9998	<,0001	DUO	12hL
2-Phenylpropionate	Campylobacter	Metabolite	Bacteria	2-PhenylpropionateCampylobacter	3	127	177	0,9684	6	0,7324	0,9967	0,0015	DUO	+126
N-Phenylacetylglycine	Campylobacter	Metabolite	Bacteria	N-PhenylacetylglycineCampylobacter	3	127	177	0,9389	6	0,5351	0,9935	0,0055	DUO	+126
Glycine	Campylobacter	Metabolite	Bacteria	GlycineCampylobacter	1	127	177	0,8255	6	0,0421	0,9803	0,0430	DUO	-42
Butyrate	Campylobacter	Metabolite	Bacteria	ButyrateCampylobacter	2	126	177	0,9970	6	0,9713	0,9997	<,0001	DUO	-42
Phenylalanine	Campylobacter	Metabolite	Bacteria	PhenylalanineCampylobacter	3	126	177	0,9990	6	0,9902	0,9999	<,0001	DUO	-42
Phenylalanine	Campylobacter	Metabolite	Bacteria	PhenylalanineCampylobacter	3	126	177	0,9996	7	0,9973	0,9999	<,0001	DUO	12hL
Butyrate	Campylobacter	Metabolite	Bacteria	ButyrateCampylobacter	2	126	177	0,9675	7	0,7903	0,9954	0,0004	DUO	12hL
Phenylalanine	Campylobacter	Metabolite	Bacteria	PhenylalanineCampylobacter	3	126	177	0,9328	6	0,4990	0,9928	0,0066	DUO	+126
Ferulate	Campylobacter	Metabolite	Bacteria	FerulateCampylobacter	3	124	177	0,9928	6	0,9327	0,9992	<,0001	DUO	-42
Maltose	Campylobacter	Metabolite	Bacteria	MaltoseCampylobacter	2	124	177	0,9950	6	0,9531	0,9995	<,0001	DUO	-42
Ferulate	Campylobacter	Metabolite	Bacteria	FerulateCampylobacter	3	124	177	0,9960	7	0,9719	0,9994	<,0001	DUO	12hL
Maltose	Campylobacter	Metabolite	Bacteria	MaltoseCampylobacter	2	124	177	0,9997	7	0,9981	10000	<,0001	DUO	12hL
Ferulate	Campylobacter	Metabolite	Bacteria	FerulateCampylobacter	3	124	177	0,9727	6	0,7654	0,9971	0,0011	DUO	+126
Nicotinate	Campylobacter	Metabolite	Bacteria	NicotinateCampylobacter	3	123	177	10000	6	10000	10000	<,0001	DUO	-42
Nicotinate	Campylobacter	Metabolite	Bacteria	NicotinateCampylobacter	3	123	177	0,9999	7	0,9995	10000	<,0001	DUO	12hL
Nicotinate	Campylobacter	Metabolite	Bacteria	NicotinateCampylobacter	3	123	177	0,9999	6	0,9995	10000	<,0001	DUO	+126
3-Phenylpropionate	Campylobacter	Metabolite	Bacteria	3-PhenylpropionateCampylobacter	4	121	177	0,9996	6	0,9957	10000	<,0001	DUO	-42
3-Phenylpropionate	Campylobacter	Metabolite	Bacteria	3-PhenylpropionateCampylobacter	4	121	177	0,9990	7	0,9927	0,9999	<,0001	DUO	12hL
3-Phenylpropionate	Campylobacter	Metabolite	Bacteria	3-PhenylpropionateCampylobacter	4	121	177	0,9960	6	0,9626	0,9996	<,0001	DUO	+126
3-Phenylpropionate	Campylobacter	Metabolite	Bacteria	3-PhenylpropionateCampylobacter	4	121	177	0,9338	5	0,2929	0,9957	0,0202	DUO	12hC
Methylamine	Campylobacter	Metabolite	Bacteria	MethylamineCampylobacter	4	120	177	0,9972	6	0,9738	0,9997	<,0001	DUO	-42
Methylamine	Campylobacter	Metabolite	Bacteria	MethylamineCampylobacter	4	120	177	0,9538	7	0,7127	0,9934	0,0009	DUO	12hL
Methylamine	Campylobacter	Metabolite	Bacteria	MethylamineCampylobacter	4	120	177	0,8877	6	0,2723	0,9877	0,0182	DUO	+126
Methylamine	Campylobacter	Metabolite	Bacteria	MethylamineCampylobacter	4	120	177	0,8999	5	0,0856	0,9934	0,0374	RUM	24hL
Isovalerate	Campylobacter	Metabolite	Bacteria	IsovalerateCampylobacter	2	119	177	0,9845	6	0,8600	0,9984	0,0004	DUO	-42
Isovalerate	Campylobacter	Metabolite	Bacteria	IsovalerateCampylobacter	2	119	177	0,8697	7	0,3382	0,9806	0,0110	DUO	12hL
Methanol	Campylobacter	Metabolite	Bacteria	MethanolCampylobacter	3	118	177	10000	6	0,9998	10000	<,0001	DUO	-42
Methanol	Campylobacter	Metabolite	Bacteria	MethanolCampylobacter	3	118	177	0,9983	7	0,9880	0,9998	<,0001	DUO	12hL
Methanol	Campylobacter	Metabolite	Bacteria	MethanolCampylobacter	3	118	177	0,9991	6	0,9916	0,9999	<,0001	DUO	+126
Histidine	Campylobacter	Metabolite	Bacteria	HistidineCampylobacter	4	116	177	0,9999	6	0,9994	10000	<,0001	DUO	-42
Tyrosine	Campylobacter	Metabolite	Bacteria	TyrosineCampylobacter	3	116	177	0,9994	6	0,9941	0,9999	<,0001	DUO	-42
Histidine	Campylobacter	Metabolite	Bacteria	HistidineCampylobacter	4	116	177	0,9999	7	0,9995	10000	<,0001	DUO	12hL
Tyrosine	Campylobacter	Metabolite	Bacteria	TyrosineCampylobacter	3	116	177	0,9997	7	0,9981	10000	<,0001	DUO	12hL
Histidine	Campylobacter	Metabolite	Bacteria	HistidineCampylobacter	4	116	177	0,9998	6	0,9977	10000	<,0001	DUO	+126
Tyrosine	Campylobacter	Metabolite	Bacteria	TyrosineCampylobacter	3	116	177	0,9343	6	0,5077	0,9930	0,0063	DUO	+126
Histidine	Campylobacter	Metabolite	Bacteria	HistidineCampylobacter	4	116	177	0,9231	5	0,2202	0,9950	0,0253	DUO	12hC
Acetoacetate	Campylobacter	Metabolite	Bacteria	AcetoacetateCampylobacter	2	115	177	0,9982	6	0,9824	0,9998	<,0001	DUO	-42
Acetoacetate	Campylobacter	Metabolite	Bacteria	AcetoacetateCampylobacter	2	115	177	0,9793	7	0,8615	0,9971	0,0001	DUO	12hL
Glutamate	Campylobacter	Metabolite	Bacteria	GlutamateCampylobacter	3	114	177	0,9987	6	0,9880	0,9999	<,0001	DUO	-42
Xanthine	Campylobacter	Metabolite	Bacteria	XanthineCampylobacter	3	114	177	0,9988	6	0,9888	0,9999	<,0001	DUO	-42
Glutamate	Campylobacter	Metabolite	Bacteria	GlutamateCampylobacter	3	114	177	0,9845	7	0,8950	0,9978	<,0001	DUO	12hL
Xanthine	Campylobacter	Metabolite	Bacteria	XanthineCampylobacter	3	114	177	0,9997	7	0,9980	10000	<,0001	DUO	12hL
Xanthine	Campylobacter	Metabolite	Bacteria	XanthineCampylobacter	3	114	177	0,9951	6	0,9534	0,9995	<,0001	DUO	+126
Glutamate	Campylobacter	Metabolite	Bacteria	GlutamateCampylobacter	3	114	177	0,9355	6	0,5149	0,9931	0,0061	DUO	+126
3-Hydroxybutyrate	Campylobacter	Metabolite	Bacteria	3-HydroxybutyrateCampylobacter	5	112	177	0,9968	6	0,9695	0,9997	<,0001	DUO	-42
3-Hydroxybutyrate	Campylobacter	Metabolite	Bacteria	3-HydroxybutyrateCampylobacter	5	112	177	0,9870	7	0,9115	0,9982	<,0001	DUO	12hL
3-Hydroxybutyrate	Campylobacter	Metabolite	Bacteria	3-HydroxybutyrateCampylobacter	5	112	177	0,9475	6	0,5884	0,9944	0,0041	DUO	+126
3-Hydroxybutyrate	Campylobacter	Metabolite	Bacteria	3-HydroxybutyrateCampylobacter	5	112	177	-0,8299	6	-0,9808	-0,0561	0,0410	RUM	+118
3-Hydroxybutyrate	Campylobacter	Metabolite	Bacteria	3-HydroxybutyrateCampylobacter	5	112	177	0,8873	5	0,0232	0,9926	0,0446	RUM	24hL
Glucose	Campylobacter	Metabolite	Bacteria	GlucoseCampylobacter	3	110	177	0,9971	6	0,9720	0,9997	<,0001	DUO	-42
Glucose	Campylobacter	Metabolite	Bacteria	GlucoseCampylobacter	3	110	177	0,9997	7	0,9977	10000	<,0001	DUO	12hL
Ornithine	Campylobacter	Metabolite	Bacteria	OrnithineCampylobacter	3	110	177	0,9841	6	0,8573	0,9983	0,0004	DUO	-42
Ornithine	Campylobacter	Metabolite	Bacteria	OrnithineCampylobacter	3	110	177	0,9433	7	0,6568	0,9918	0,0014	DUO	12hL
Ornithine	Campylobacter	Metabolite	Bacteria	OrnithineCampylobacter	3	110	177	0,9465	6	0,5823	0,9943	0,0042	DUO	+126
Glucose	Campylobacter	Metabolite	Bacteria	GlucoseCampylobacter	3	110	177	0,8575	6	0,1511	0,9842	0,0290	DUO	+126
Adipate	Campylobacter	Metabolite	Bacteria	AdipateCampylobacter	2	109	177	0,9929	6	0,9336	0,9993	<,0001	DUO	-42
Isoleucine	Campylobacter	Metabolite	Bacteria	IsoleucineCampylobacter	3	109	177	0,9997	6	0,9975	10000	<,0001	DUO	-42
Adipate	Campylobacter	Metabolite	Bacteria	AdipateCampylobacter	2	109	177	0,9894	7	0,9270	0,9985	<,0001	DUO	12hL
Propionate	Campylobacter	Metabolite	Bacteria	PropionateCampylobacter	1	109	177	0,9878	6	0,8884	0,9987	0,0002	DUO	-42
Isoleucine	Campylobacter	Metabolite	Bacteria	IsoleucineCampylobacter	3	109	177	0,9676	7	0,7909	0,9954	0,0004	DUO	12hL
Isoleucine	Campylobacter	Metabolite	Bacteria	IsoleucineCampylobacter	3	109	177	0,9131	5	0,1586	0,9943	0,0303	RUM	24hL
Isobutyrate	Campylobacter	Metabolite	Bacteria	IsobutyrateCampylobacter	3	103	177	0,9918	6	0,9235	0,9991	0,0001	DUO	-42
Isobutyrate	Campylobacter	Metabolite	Bacteria	IsobutyrateCampylobacter	3	103	177	0,7864	7	0,0817	0,9669	0,0360	DUO	12hL
Isobutyrate	Campylobacter	Metabolite	Bacteria	IsobutyrateCampylobacter	3	103	177	0,9618	4	0,0092	0,9992	0,0382	DUO	72hL
3-Hydroxyphenylacetate	Campylobacter	Metabolite	Bacteria	3-HydroxyphenylacetateCampylobacter	3	101	177	0,9976	6	0,9774	0,9998	<,0001	DUO	-42
3-Hydroxyphenylacetate	Campylobacter	Metabolite	Bacteria	3-HydroxyphenylacetateCampylobacter	3	101	177	0,9991	7	0,9938	0,9999	<,0001	DUO	12hL
3-Hydroxyphenylacetate	Campylobacter	Metabolite	Bacteria	3-HydroxyphenylacetateCampylobacter	3	101	177	0,9829	6	0,8473	0,9982	0,0004	DUO	+126
Formate	Treponema	Metabolite	Bacteria	FormateTreponema	3	178	169	0,9438	6	0,5650	0,9940	0,0046	DUO	-42
Formate	Treponema	Metabolite	Bacteria	FormateTreponema	3	178	169	0,9895	4	0,5797	0,9998	0,0105	DUO	+118
Formate	Treponema	Metabolite	Bacteria	FormateTreponema	3	178	169	-0,8355	6	-0,9815	-0,0742	0,0384	RUM	12hL
Choline	Treponema	Metabolite	Bacteria	CholineTreponema	3	173	169	0,9389	6	0,5350	0,9935	0,0055	DUO	-42
Choline	Treponema	Metabolite	Bacteria	CholineTreponema	3	173	169	0,9835	4	0,4104	0,9997	0,0165	DUO	+118
Choline	Treponema	Metabolite	Bacteria	CholineTreponema	3	173	169	-0,8248	6	-0,9802	-0,0401	0,0433	DUO	-14
Fumarate	Treponema	Metabolite	Bacteria	FumarateTreponema	1	166	169	0,9479	6	0,5909	0,9945	0,0040	DUO	-42
Proline	Treponema	Metabolite	Bacteria	ProlineTreponema	3	165	169	0,9968	4	0,8515	0,9999	0,0032	DUO	+118
Proline	Treponema	Metabolite	Bacteria	ProlineTreponema	3	165	169	0,9415	6	0,5511	0,9938	0,0050	DUO	-42
Proline	Treponema	Metabolite	Bacteria	ProlineTreponema	3	165	169	-0,8885	5	-0,9926	-0,0287	0,0440	DUO	24hL
Aspartate	Treponema	Metabolite	Bacteria	AspartateTreponema	4	159	169	0,9382	6	0,5310	0,9934	0,0056	DUO	-42
Aspartate	Treponema	Metabolite	Bacteria	AspartateTreponema	4	159	169	0,9841	4	0,4247	0,9997	0,0159	DUO	+118
Aspartate	Treponema	Metabolite	Bacteria	AspartateTreponema	4	159	169	0,9417	5	0,3509	0,9962	0,0168	RUM	24hL
Aspartate	Treponema	Metabolite	Bacteria	AspartateTreponema	4	159	169	-0,9306	5	-0,9955	-0,2701	0,0217	DUO	24hL
Ribose	Treponema	Metabolite	Bacteria	RiboseTreponema	4	158	169	0,9446	6	0,5701	0,9941	0,0045	DUO	-42
Ribose	Treponema	Metabolite	Bacteria	RiboseTreponema	4	158	169	0,9662	5	0,5692	0,9979	0,0074	RUM	24hL
Ribose	Treponema	Metabolite	Bacteria	RiboseTreponema	4	158	169	0,9903	4	0,6048	0,9998	0,0097	DUO	+118
Ribose	Treponema	Metabolite	Bacteria	RiboseTreponema	4	158	169	-0,9061	5	-0,9939	-0,1188	0,0341	DUO	24hL
Isopropanol	Treponema	Metabolite	Bacteria	IsopropanolTreponema	3	154	169	0,9841	5	0,7731	0,9990	0,0024	RUM	24hL
1,3-Dihydroxyacetone	Treponema	Metabolite	Bacteria	1,3-DihydroxyacetoneTreponema	3	154	169	-0,9093	7	-0,9867	-0,4956	0,0045	DUO	+100
1,3-Dihydroxyacetone	Treponema	Metabolite	Bacteria	1,3-DihydroxyacetoneTreponema	3	154	169	0,9438	6	0,5651	0,9940	0,0046	DUO	-42
Isopropanol	Treponema	Metabolite	Bacteria	IsopropanolTreponema	3	154	169	0,9443	6	0,5681	0,9941	0,0046	DUO	-42
Isopropanol	Treponema	Metabolite	Bacteria	IsopropanolTreponema	3	154	169	0,9927	4	0,6866	0,9999	0,0073	DUO	+118
1,3-Dihydroxyacetone	Treponema	Metabolite	Bacteria	1,3-DihydroxyacetoneTreponema	3	154	169	0,9687	4	0,1100	0,9994	0,0313	DUO	+118
Lactate	Treponema	Metabolite	Bacteria	LactateTreponema	4	153	169	0,9491	6	0,5987	0,9946	0,0038	DUO	-42
Lactate	Treponema	Metabolite	Bacteria	LactateTreponema	4	153	169	0,9695	5	0,6032	0,9981	0,0064	RUM	24hL
Lactate	Treponema	Metabolite	Bacteria	LactateTreponema	4	153	169	-0,8489	7	-0,9772	-0,2658	0,0157	DUO	+100
Lactate	Treponema	Metabolite	Bacteria	LactateTreponema	4	153	169	-0,8927	5	-0,9929	-0,0493	0,0415	DUO	24hL
Serine	Treponema	Metabolite	Bacteria	SerineTreponema	4	152	169	0,9431	6	0,5606	0,9939	0,0048	DUO	-42
Serine	Treponema	Metabolite	Bacteria	SerineTreponema	4	152	169	0,9887	4	0,5545	0,9998	0,0113	DUO	+118
Serine	Treponema	Metabolite	Bacteria	SerineTreponema	4	152	169	-0,8201	7	-0,9725	-0,1755	0,0239	DUO	+100
Serine	Treponema	Metabolite	Bacteria	SerineTreponema	4	152	169	-0,9183	5	-0,9947	-0,1896	0,0277	DUO	24hL
Cadaverine	Treponema	Metabolite	Bacteria	CadaverineTreponema	3	143	169	0,9721	5	0,6308	0,9982	0,0056	RUM	24hL
Uracil	Treponema	Metabolite	Bacteria	UracilTreponema	3	143	169	0,9362	6	0,5188	0,9932	0,0060	DUO	-42
Cadaverine	Treponema	Metabolite	Bacteria	CadaverineTreponema	3	143	169	0,9279	6	0,4712	0,9923	0,0076	DUO	-42
Uracil	Treponema	Metabolite	Bacteria	UracilTreponema	3	143	169	0,8967	5	0,0690	0,9932	0,0392	DUO	12hC
Cadaverine	Treponema	Metabolite	Bacteria	CadaverineTreponema	3	143	169	-0,8216	6	-0,9798	-0,0301	0,0449	DUO	-14
Uracil	Treponema	Metabolite	Bacteria	UracilTreponema	3	143	169	0,9526	4	-0,1009	0,9990	0,0474	DUO	+118
Lysine	Treponema	Metabolite	Bacteria	LysineTreponema	4	140	169	0,9452	6	0,5741	0,9942	0,0044	DUO	-42
Succinate	Treponema	Metabolite	Bacteria	SuccinateTreponema	4	140	169	0,9438	6	0,5652	0,9940	0,0046	DUO	-42
Lysine	Treponema	Metabolite	Bacteria	LysineTreponema	4	140	169	-0,9721	5	-0,9982	-0,6309	0,0056	DUO	24hL
Succinate	Treponema	Metabolite	Bacteria	SuccinateTreponema	4	140	169	0,9901	4	0,5984	0,9998	0,0099	DUO	+118
Lysine	Treponema	Metabolite	Bacteria	LysineTreponema	4	140	169	0,9541	5	0,4538	0,9971	0,0117	RUM	24hL
Succinate	Treponema	Metabolite	Bacteria	SuccinateTreponema	4	140	169	-0,8487	7	-0,9772	-0,2650	0,0157	DUO	+100
Allantoin	Treponema	Metabolite	Bacteria	AllantoinTreponema	2	140	169	-0,8406	6	-0,9821	-0,0913	0,0361	RUM	72hL
Succinate	Treponema	Metabolite	Bacteria	SuccinateTreponema	4	140	169	-0,9605	4	-0,9992	0,0075	0,0395	DUO	72hL
Lysine	Treponema	Metabolite	Bacteria	LysineTreponema	4	140	169	0,9578	4	-0,0413	0,9991	0,0422	DUO	+118
Allantoin	Treponema	Metabolite	Bacteria	AllantoinTreponema	2	140	169	0,8900	5	0,0362	0,9927	0,0430	DUO	24hL
4-Hydroxybutyrate	Treponema	Metabolite	Bacteria	4-HydroxybutyrateTreponema	3	139	169	0,9399	6	0,5410	0,9936	0,0053	DUO	-42
Trimethylamine	Treponema	Metabolite	Bacteria	TrimethylamineTreponema	4	139	169	-0,9831	4	-0,9997	-0,3989	0,0169	DUO	72hL
Trimethylamine	Treponema	Metabolite	Bacteria	TrimethylamineTreponema	4	139	169	0,8671	6	0,1873	0,9853	0,0253	DUO	+126
Trimethylamine	Treponema	Metabolite	Bacteria	TrimethylamineTreponema	4	139	169	0,9220	5	0,2130	0,9949	0,0258	RUM	24hL
Trimethylamine	Treponema	Metabolite	Bacteria	TrimethylamineTreponema	4	139	169	0,8588	6	0,1561	0,9843	0,0285	DUO	-42
4-Hydroxybutyrate	Treponema	Metabolite	Bacteria	4-HydroxybutyrateTreponema	3	139	169	0,9630	4	0,0257	0,9993	0,0370	DUO	+118
4-Hydroxybutyrate	Treponema	Metabolite	Bacteria	4-HydroxybutyrateTreponema	3	139	169	-0,8822	5	-0,9922	0,0002	0,0477	DUO	24hL
Pimelate	Treponema	Metabolite	Bacteria	PimelateTreponema	3	137	169	0,9311	6	0,4889	0,9926	0,0070	DUO	-42
Pimelate	Treponema	Metabolite	Bacteria	PimelateTreponema	3	137	169	0,9113	5	0,1481	0,9942	0,0313	RUM	24hL
Pimelate	Treponema	Metabolite	Bacteria	PimelateTreponema	3	137	169	-0,8488	6	-0,9831	-0,1198	0,0325	DUO	-14
N-nitrosodimethylamine	Treponema	Metabolite	Bacteria	N-nitrosodimethylamineTreponema	4	136	169	0,9385	6	0,5327	0,9934	0,0056	DUO	-42
N-nitrosodimethylamine	Treponema	Metabolite	Bacteria	N-nitrosodimethylamineTreponema	4	136	169	0,9932	4	0,7057	0,9999	0,0068	DUO	+118
N-nitrosodimethylamine	Treponema	Metabolite	Bacteria	N-nitrosodimethylamineTreponema	4	136	169	-0,9589	5	-0,9974	-0,4977	0,0099	DUO	24hL
N-nitrosodimethylamine	Treponema	Metabolite	Bacteria	N-nitrosodimethylamineTreponema	4	136	169	0,8642	6	0,1761	0,9850	0,0264	RUM	72hC
Phenylacetate	Treponema	Metabolite	Bacteria	PhenylacetateTreponema	2	134	169	0,9177	6	0,4157	0,9911	0,0099	DUO	-42
Phenylacetate	Treponema	Metabolite	Bacteria	PhenylacetateTreponema	2	134	169	0,9031	5	0,1022	0,9936	0,0357	DUO	12hC
Caffeine	Treponema	Metabolite	Bacteria	CaffeineTreponema	5	133	169	0,9992	4	0,9593	10000	0,0008	DUO	+118
Hypoxanthine	Treponema	Metabolite	Bacteria	HypoxanthineTreponema	4	133	169	0,9421	6	0,5547	0,9938	0,0049	DUO	-42
Caffeine	Treponema	Metabolite	Bacteria	CaffeineTreponema	5	133	169	0,9415	6	0,5510	0,9938	0,0050	DUO	-42
Valerate	Treponema	Metabolite	Bacteria	ValerateTreponema	3	133	169	0,9350	6	0,5116	0,9930	0,0062	DUO	-42
Caffeine	Treponema	Metabolite	Bacteria	CaffeineTreponema	5	133	169	0,9133	6	0,3929	0,9906	0,0110	RUM	24hC
Caffeine	Treponema	Metabolite	Bacteria	CaffeineTreponema	5	133	169	-0,9557	5	-0,9972	-0,4683	0,0111	DUO	24hL
Hypoxanthine	Treponema	Metabolite	Bacteria	HypoxanthineTreponema	4	133	169	0,9843	4	0,4296	0,9997	0,0157	DUO	+118
Hypoxanthine	Treponema	Metabolite	Bacteria	HypoxanthineTreponema	4	133	169	-0,8952	6	-0,9886	-0,3059	0,0159	RUM	12hL
Hypoxanthine	Treponema	Metabolite	Bacteria	HypoxanthineTreponema	4	133	169	0,9417	5	0,3512	0,9962	0,0168	DUO	12hC
Valerate	Treponema	Metabolite	Bacteria	ValerateTreponema	3	133	169	0,9343	5	0,2965	0,9958	0,0200	RUM	24hL
Valerate	Treponema	Metabolite	Bacteria	ValerateTreponema	3	133	169	-0,9189	5	-0,9947	-0,1937	0,0274	DUO	24hL
Caffeine	Treponema	Metabolite	Bacteria	CaffeineTreponema	5	133	169	0,8138	6	0,0066	0,9789	0,0488	RUM	72hC
Acetone	Treponema	Metabolite	Bacteria	AcetoneTreponema	2	132	169	0,9317	6	0,4925	0,9927	0,0068	DUO	-42
Acetone	Treponema	Metabolite	Bacteria	AcetoneTreponema	2	132	169	-0,9076	5	-0,9940	-0,1270	0,0333	DUO	24hL
Benzoate	Treponema	Metabolite	Bacteria	BenzoateTreponema	3	131	169	0,9385	6	0,5325	0,9934	0,0056	DUO	-42
Valine	Treponema	Metabolite	Bacteria	ValineTreponema	3	131	169	0,9381	6	0,5303	0,9934	0,0056	DUO	-42
Valine	Treponema	Metabolite	Bacteria	ValineTreponema	3	131	169	-0,8420	6	-0,9823	-0,0961	0,0355	RUM	12hL
Benzoate	Treponema	Metabolite	Bacteria	BenzoateTreponema	3	131	169	-0,9002	5	-0,9935	-0,0874	0,0373	DUO	24hL
Benzoate	Treponema	Metabolite	Bacteria	BenzoateTreponema	3	131	169	0,8925	5	0,0484	0,9929	0,0416	DUO	12hC
Valine	Treponema	Metabolite	Bacteria	ValineTreponema	3	131	169	0,8913	5	0,0422	0,9928	0,0423	RUM	24hL
Imidazole	Treponema	Metabolite	Bacteria	ImidazoleTreponema	3	130	169	0,9990	4	0,9494	10000	0,0010	DUO	+118
Carnitine	Treponema	Metabolite	Bacteria	CarnitineTreponema	3	130	169	0,9421	6	0,5544	0,9938	0,0049	DUO	-42
Glycerol	Treponema	Metabolite	Bacteria	GlycerolTreponema	3	130	169	0,9421	6	0,5545	0,9938	0,0049	DUO	-42
Leucine	Treponema	Metabolite	Bacteria	LeucineTreponema	3	130	169	0,9424	6	0,5566	0,9939	0,0049	DUO	-42
Imidazole	Treponema	Metabolite	Bacteria	ImidazoleTreponema	3	130	169	0,9392	6	0,5368	0,9935	0,0054	DUO	-42
Glycerol	Treponema	Metabolite	Bacteria	GlycerolTreponema	3	130	169	0,9900	4	0,5947	0,9998	0,0100	DUO	+118
Alanine	Treponema	Metabolite	Bacteria	AlanineTreponema	3	130	169	0,9164	6	0,4088	0,9910	0,0102	DUO	-42
Dimethylamine	Treponema	Metabolite	Bacteria	DimethylamineTreponema	1	130	169	-0,9875	4	-0,9997	-0,5176	0,0125	DUO	72hL
Leucine	Treponema	Metabolite	Bacteria	LeucineTreponema	3	130	169	-0,9258	5	-0,9952	-0,2379	0,0240	DUO	24hL
Glycerol	Treponema	Metabolite	Bacteria	GlycerolTreponema	3	130	169	-0,9248	5	-0,9951	-0,2309	0,0245	DUO	24hL
Imidazole	Treponema	Metabolite	Bacteria	ImidazoleTreponema	3	130	169	0,9177	5	0,1862	0,9946	0,0280	DUO	12hC
Alanine	Treponema	Metabolite	Bacteria	AlanineTreponema	3	130	169	0,9134	5	0,1605	0,9944	0,0302	RUM	24hL
Leucine	Treponema	Metabolite	Bacteria	LeucineTreponema	3	130	169	0,9023	5	0,0983	0,9936	0,0361	RUM	24hL
Carnitine	Treponema	Metabolite	Bacteria	CarnitineTreponema	3	130	169	-0,7841	7	-0,9665	-0,0759	0,0369	DUO	+100
Alanine	Treponema	Metabolite	Bacteria	AlanineTreponema	3	130	169	-0,8828	5	-0,9922	-0,0025	0,0473	DUO	24hL
Carnitine	Treponema	Metabolite	Bacteria	CarnitineTreponema	3	130	169	-0,9515	4	-0,9990	0,1119	0,0485	DUO	72hL
Ethanol	Treponema	Metabolite	Bacteria	EthanolTreponema	3	129	169	0,9469	6	0,5847	0,9943	0,0042	DUO	-42
Ethanol	Treponema	Metabolite	Bacteria	EthanolTreponema	3	129	169	-0,8401	6	-0,9821	-0,0898	0,0363	RUM	12hL
Ethanol	Treponema	Metabolite	Bacteria	EthanolTreponema	3	129	169	0,8192	6	0,0227	0,9795	0,0461	RUM	+118
2-Phenylpropionate	Treponema	Metabolite	Bacteria	2-PhenylpropionateTreponema	2	127	169	0,9475	6	0,5883	0,9944	0,0041	DUO	-42
N-Phenylacetylglycine	Treponema	Metabolite	Bacteria	N-PhenylacetylglycineTreponema	4	127	169	0,9412	6	0,5491	0,9937	0,0051	DUO	-42
Glycine	Treponema	Metabolite	Bacteria	GlycineTreponema	2	127	169	-0,9653	5	-0,9978	-0,5593	0,0077	DUO	24hL
Glycine	Treponema	Metabolite	Bacteria	GlycineTreponema	2	127	169	-0,9069	6	-0,9899	-0,3610	0,0126	RUM	12hL
N-Phenylacetylglycine	Treponema	Metabolite	Bacteria	N-PhenylacetylglycineTreponema	4	127	169	-0,8916	6	-0,9881	-0,2894	0,0170	RUM	72hC
2-Phenylpropionate	Treponema	Metabolite	Bacteria	2-PhenylpropionateTreponema	2	127	169	0,9813	4	0,3544	0,9996	0,0187	DUO	+118
N-Phenylacetylglycine	Treponema	Metabolite	Bacteria	N-PhenylacetylglycineTreponema	4	127	169	0,9776	4	0,2735	0,9996	0,0224	DUO	+118
N-Phenylacetylglycine	Treponema	Metabolite	Bacteria	N-PhenylacetylglycineTreponema	4	127	169	-0,8166	6	-0,9792	-0,0151	0,0473	RUM	12hL
Phenylalanine	Treponema	Metabolite	Bacteria	PhenylalanineTreponema	2	126	169	0,9416	6	0,5517	0,9938	0,0050	DUO	-42
Butyrate	Treponema	Metabolite	Bacteria	ButyrateTreponema	2	126	169	0,9289	6	0,4767	0,9924	0,0074	DUO	-42
Phenylalanine	Treponema	Metabolite	Bacteria	PhenylalanineTreponema	2	126	169	-0,8807	6	-0,9869	-0,2424	0,0205	RUM	12hL
Butyrate	Treponema	Metabolite	Bacteria	ButyrateTreponema	2	126	169	0,9123	5	0,1537	0,9943	0,0308	RUM	24hL
Maltose	Treponema	Metabolite	Bacteria	MaltoseTreponema	3	124	169	0,9647	6	0,7055	0,9963	0,0018	RUM	+118
Ferulate	Treponema	Metabolite	Bacteria	FerulateTreponema	3	124	169	0,9980	4	0,9037	10000	0,0020	DUO	+118
Ferulate	Treponema	Metabolite	Bacteria	FerulateTreponema	3	124	169	0,9294	6	0,4797	0,9924	0,0073	DUO	-42
Maltose	Treponema	Metabolite	Bacteria	MaltoseTreponema	3	124	169	0,9294	6	0,4793	0,9924	0,0073	DUO	-42
Ferulate	Treponema	Metabolite	Bacteria	FerulateTreponema	3	124	169	-0,9191	5	-0,9947	-0,1951	0,0273	DUO	24hL
Maltose	Treponema	Metabolite	Bacteria	MaltoseTreponema	3	124	169	-0,9190	5	-0,9947	-0,1944	0,0273	DUO	24hL
Nicotinate	Treponema	Metabolite	Bacteria	NicotinateTreponema	4	123	169	0,9421	6	0,5547	0,9938	0,0049	DUO	-42
Nicotinate	Treponema	Metabolite	Bacteria	NicotinateTreponema	4	123	169	0,9915	4	0,6459	0,9998	0,0085	DUO	+118
Nicotinate	Treponema	Metabolite	Bacteria	NicotinateTreponema	4	123	169	0,9214	5	0,2092	0,9949	0,0261	DUO	12hC
Nicotinate	Treponema	Metabolite	Bacteria	NicotinateTreponema	4	123	169	-0,8339	6	-0,9813	-0,0692	0,0391	RUM	12hL
3-Phenylpropionate	Treponema	Metabolite	Bacteria	3-PhenylpropionateTreponema	3	121	169	0,9435	6	0,5634	0,9940	0,0047	DUO	-42
3-Phenylpropionate	Treponema	Metabolite	Bacteria	3-PhenylpropionateTreponema	3	121	169	-0,8986	7	-0,9851	-0,4503	0,0059	DUO	+100
3-Phenylpropionate	Treponema	Metabolite	Bacteria	3-PhenylpropionateTreponema	3	121	169	-0,9695	4	-0,9994	-0,1231	0,0305	DUO	72hL
Methylamine	Treponema	Metabolite	Bacteria	MethylamineTreponema	2	120	169	0,9567	6	0,6492	0,9954	0,0028	DUO	-42
Methylamine	Treponema	Metabolite	Bacteria	MethylamineTreponema	2	120	169	0,8954	5	0,0623	0,9931	0,0400	RUM	24hL
Isovalerate	Treponema	Metabolite	Bacteria	IsovalerateTreponema	2	119	169	0,9617	6	0,6840	0,9959	0,0022	DUO	-42
Isovalerate	Treponema	Metabolite	Bacteria	IsovalerateTreponema	2	119	169	-0,7960	7	-0,9685	-0,1072	0,0322	DUO	+100
Methanol	Treponema	Metabolite	Bacteria	MethanolTreponema	2	118	169	0,9425	6	0,5567	0,9939	0,0049	DUO	-42
Methanol	Treponema	Metabolite	Bacteria	MethanolTreponema	2	118	169	0,9941	4	0,7409	0,9999	0,0059	DUO	+118
Histidine	Treponema	Metabolite	Bacteria	HistidineTreponema	3	116	169	0,9994	4	0,9720	10000	0,0006	DUO	+118
Tyrosine	Treponema	Metabolite	Bacteria	TyrosineTreponema	3	116	169	0,9462	6	0,5803	0,9943	0,0043	DUO	-42
Histidine	Treponema	Metabolite	Bacteria	HistidineTreponema	3	116	169	0,9436	6	0,5640	0,9940	0,0047	DUO	-42
Tyrosine	Treponema	Metabolite	Bacteria	TyrosineTreponema	3	116	169	0,9265	5	0,2422	0,9952	0,0237	DUO	12hC
Histidine	Treponema	Metabolite	Bacteria	HistidineTreponema	3	116	169	-0,7976	7	-0,9688	-0,1116	0,0316	DUO	+100
Tyrosine	Treponema	Metabolite	Bacteria	TyrosineTreponema	3	116	169	-0,8390	6	-0,9819	-0,0859	0,0368	RUM	72hC
Acetoacetate	Treponema	Metabolite	Bacteria	AcetoacetateTreponema	2	115	169	0,9377	6	0,5276	0,9933	0,0057	DUO	-42
Acetoacetate	Treponema	Metabolite	Bacteria	AcetoacetateTreponema	2	115	169	-0,9586	5	-0,9974	-0,4953	0,0100	DUO	24hL
Glutamate	Treponema	Metabolite	Bacteria	GlutamateTreponema	2	114	169	-0,9843	5	-0,9990	-0,7750	0,0024	DUO	24hL
Xanthine	Treponema	Metabolite	Bacteria	XanthineTreponema	4	114	169	-0,9761	5	-0,9985	-0,6755	0,0044	DUO	24hL
Glutamate	Treponema	Metabolite	Bacteria	GlutamateTreponema	2	114	169	0,9411	6	0,5481	0,9937	0,0051	DUO	-42
Xanthine	Treponema	Metabolite	Bacteria	XanthineTreponema	4	114	169	0,9357	6	0,5160	0,9931	0,0061	DUO	-42
Xanthine	Treponema	Metabolite	Bacteria	XanthineTreponema	4	114	169	0,9019	5	0,0963	0,9936	0,0363	DUO	12hC
Xanthine	Treponema	Metabolite	Bacteria	XanthineTreponema	4	114	169	0,9598	4	-0,0166	0,9992	0,0402	DUO	72hL
3-Hydroxybutyrate	Treponema	Metabolite	Bacteria	3-HydroxybutyrateTreponema	2	112	169	-0,9043	7	-0,9859	-0,4741	0,0052	DUO	+100
3-Hydroxybutyrate	Treponema	Metabolite	Bacteria	3-HydroxybutyrateTreponema	2	112	169	0,9274	6	0,4681	0,9922	0,0077	DUO	-42
Ornithine	Treponema	Metabolite	Bacteria	OrnithineTreponema	3	110	169	-0,9784	5	-0,9986	-0,7029	0,0038	DUO	24hL
Glucose	Treponema	Metabolite	Bacteria	GlucoseTreponema	2	110	169	0,9341	6	0,5067	0,9929	0,0064	DUO	-42
Ornithine	Treponema	Metabolite	Bacteria	OrnithineTreponema	3	110	169	0,9197	6	0,4266	0,9913	0,0094	DUO	-42
Glucose	Treponema	Metabolite	Bacteria	GlucoseTreponema	2	110	169	-0,9275	5	-0,9953	-0,2487	0,0232	DUO	24hL
Ornithine	Treponema	Metabolite	Bacteria	OrnithineTreponema	3	110	169	-0,8144	6	-0,9789	-0,0085	0,0485	DUO	-14
Isoleucine	Treponema	Metabolite	Bacteria	IsoleucineTreponema	3	109	169	0,9463	6	0,5807	0,9943	0,0042	DUO	-42
Isoleucine	Treponema	Metabolite	Bacteria	IsoleucineTreponema	3	109	169	-0,9053	7	-0,9861	-0,4785	0,0050	DUO	+100
Adipate	Treponema	Metabolite	Bacteria	AdipateTreponema	3	109	169	0,9361	6	0,5185	0,9932	0,0060	DUO	-42
Propionate	Treponema	Metabolite	Bacteria	PropionateTreponema	1	109	169	0,9355	6	0,5148	0,9931	0,0061	DUO	-42
Adipate	Treponema	Metabolite	Bacteria	AdipateTreponema	3	109	169	-0,8391	6	-0,9820	-0,0864	0,0367	DUO	-14
Isoleucine	Treponema	Metabolite	Bacteria	IsoleucineTreponema	3	109	169	-0,8826	5	-0,9922	-0,0015	0,0474	DUO	24hL
Adipate	Treponema	Metabolite	Bacteria	AdipateTreponema	3	109	169	-0,8804	5	-0,9921	0,0085	0,0488	DUO	24hL
Isobutyrate	Treponema	Metabolite	Bacteria	IsobutyrateTreponema	3	103	169	0,9709	6	0,7511	0,9969	0,0013	DUO	-42
Isobutyrate	Treponema	Metabolite	Bacteria	IsobutyrateTreponema	3	103	169	0,9282	5	0,2537	0,9954	0,0228	DUO	12hC
Isobutyrate	Treponema	Metabolite	Bacteria	IsobutyrateTreponema	3	103	169	0,8413	6	0,0936	0,9822	0,0358	RUM	72hC
3-Hydroxyphenylacetate	Treponema	Metabolite	Bacteria	3-HydroxyphenylacetateTreponema	3	101	169	0,9303	6	0,4844	0,9925	0,0071	DUO	-42
3-Hydroxyphenylacetate	Treponema	Metabolite	Bacteria	3-HydroxyphenylacetateTreponema	3	101	169	-0,9564	5	-0,9972	-0,4747	0,0109	DUO	24hL
3-Hydroxyphenylacetate	Treponema	Metabolite	Bacteria	3-HydroxyphenylacetateTreponema	3	101	169	0,9733	4	0,1891	0,9995	0,0267	DUO	72hL
Urea	Treponema	Metabolite	Bacteria	UreaTreponema	1	65	169	-0,8581	6	-0,9842	-0,1533	0,0288	RUM	72hL
Formate	Megasphaera	Metabolite	Bacteria	FormateMegasphaera	4	178	158	0,9990	7	0,9927	0,9999	<,0001	DUO	12hL
Formate	Megasphaera	Metabolite	Bacteria	FormateMegasphaera	4	178	158	0,9994	6	0,9945	0,9999	<,0001	DUO	+126
Formate	Megasphaera	Metabolite	Bacteria	FormateMegasphaera	4	178	158	0,9312	7	0,5962	0,9900	0,0023	DUO	24hC
Formate	Megasphaera	Metabolite	Bacteria	FormateMegasphaera	4	178	158	-0,9252	5	-0,9952	-0,2339	0,0243	RUM	+100
Choline	Megasphaera	Metabolite	Bacteria	CholineMegasphaera	5	173	158	0,9784	7	0,8563	0,9969	0,0001	DUO	12hL
Choline	Megasphaera	Metabolite	Bacteria	CholineMegasphaera	5	173	158	0,9826	5	0,7542	0,9989	0,0027	RUM	24hL
Choline	Megasphaera	Metabolite	Bacteria	CholineMegasphaera	5	173	158	0,9742	5	0,6543	0,9984	0,0050	RUM	+14
Choline	Megasphaera	Metabolite	Bacteria	CholineMegasphaera	5	173	158	0,8609	7	0,3065	0,9792	0,0129	DUO	24hC
Choline	Megasphaera	Metabolite	Bacteria	CholineMegasphaera	5	173	158	0,8869	6	0,2689	0,9876	0,0185	DUO	+126
Fumarate	Megasphaera	Metabolite	Bacteria	FumarateMegasphaera	5	166	158	0,9845	7	0,8946	0,9978	<,0001	DUO	12hL
Fumarate	Megasphaera	Metabolite	Bacteria	FumarateMegasphaera	5	166	158	10000	4	0,9996	10000	<,0001	DUO	72hL
Fumarate	Megasphaera	Metabolite	Bacteria	FumarateMegasphaera	5	166	158	0,9985	6	0,9853	0,9998	<,0001	DUO	+126
Fumarate	Megasphaera	Metabolite	Bacteria	FumarateMegasphaera	5	166	158	-0,8948	5	-0,9931	-0,0593	0,0403	RUM	+100
Fumarate	Megasphaera	Metabolite	Bacteria	FumarateMegasphaera	5	166	158	0,8285	6	0,0516	0,9807	0,0416	RUM	+126
Proline	Megasphaera	Metabolite	Bacteria	ProlineMegasphaera	4	165	158	0,9998	7	0,9985	10000	<,0001	DUO	12hL
Proline	Megasphaera	Metabolite	Bacteria	ProlineMegasphaera	4	165	158	0,9999	6	0,9993	10000	<,0001	DUO	+126
Proline	Megasphaera	Metabolite	Bacteria	ProlineMegasphaera	4	165	158	0,9498	5	0,4170	0,9968	0,0134	RUM	+14
Proline	Megasphaera	Metabolite	Bacteria	ProlineMegasphaera	4	165	158	0,9454	5	0,3802	0,9965	0,0152	RUM	24hL
Aspartate	Megasphaera	Metabolite	Bacteria	AspartateMegasphaera	4	159	158	0,9981	7	0,9863	0,9997	<,0001	DUO	12hL
Aspartate	Megasphaera	Metabolite	Bacteria	AspartateMegasphaera	4	159	158	0,9696	5	0,6046	0,9981	0,0063	RUM	+14
Aspartate	Megasphaera	Metabolite	Bacteria	AspartateMegasphaera	4	159	158	0,9275	6	0,4691	0,9922	0,0077	DUO	+126
Aspartate	Megasphaera	Metabolite	Bacteria	AspartateMegasphaera	4	159	158	0,8216	6	0,0301	0,9798	0,0449	RUM	72hL
Ribose	Megasphaera	Metabolite	Bacteria	RiboseMegasphaera	3	158	158	0,9996	7	0,9968	0,9999	<,0001	DUO	12hL
Ribose	Megasphaera	Metabolite	Bacteria	RiboseMegasphaera	3	158	158	0,9887	6	0,8964	0,9988	0,0002	DUO	+126
Ribose	Megasphaera	Metabolite	Bacteria	RiboseMegasphaera	3	158	158	0,9842	5	0,7746	0,9990	0,0024	RUM	+14
1,3-Dihydroxyacetone	Megasphaera	Metabolite	Bacteria	1,3-DihydroxyacetoneMegasphaera	2	154	158	0,9888	7	0,9229	0,9984	<,0001	DUO	12hL
Isopropanol	Megasphaera	Metabolite	Bacteria	IsopropanolMegasphaera	3	154	158	0,9954	7	0,9680	0,9994	<,0001	DUO	12hL
Isopropanol	Megasphaera	Metabolite	Bacteria	IsopropanolMegasphaera	3	154	158	0,9925	6	0,9306	0,9992	<,0001	DUO	+126
1,3-Dihydroxyacetone	Megasphaera	Metabolite	Bacteria	1,3-DihydroxyacetoneMegasphaera	2	154	158	0,9857	6	0,8704	0,9985	0,0003	DUO	+126
Isopropanol	Megasphaera	Metabolite	Bacteria	IsopropanolMegasphaera	3	154	158	0,8398	7	0,2360	0,9758	0,0181	DUO	24hC
Lactate	Megasphaera	Metabolite	Bacteria	LactateMegasphaera	3	153	158	0,9990	5	0,9843	0,9999	<,0001	RUM	+14
Lactate	Megasphaera	Metabolite	Bacteria	LactateMegasphaera	3	153	158	0,9882	7	0,9195	0,9983	<,0001	DUO	12hL
Lactate	Megasphaera	Metabolite	Bacteria	LactateMegasphaera	3	153	158	0,8565	6	0,1476	0,9841	0,0294	DUO	+126
Serine	Megasphaera	Metabolite	Bacteria	SerineMegasphaera	3	152	158	0,9992	7	0,9946	0,9999	<,0001	DUO	12hL
Serine	Megasphaera	Metabolite	Bacteria	SerineMegasphaera	3	152	158	0,9721	6	0,7604	0,9971	0,0012	DUO	+126
Serine	Megasphaera	Metabolite	Bacteria	SerineMegasphaera	3	152	158	0,9149	5	0,1694	0,9945	0,0294	RUM	24hL
Cadaverine	Megasphaera	Metabolite	Bacteria	CadaverineMegasphaera	2	143	158	0,9806	7	0,8700	0,9972	<,0001	DUO	12hL
Uracil	Megasphaera	Metabolite	Bacteria	UracilMegasphaera	4	143	158	0,9972	7	0,9800	0,9996	<,0001	DUO	12hL
Uracil	Megasphaera	Metabolite	Bacteria	UracilMegasphaera	4	143	158	0,9984	6	0,9847	0,9998	<,0001	DUO	+126
Cadaverine	Megasphaera	Metabolite	Bacteria	CadaverineMegasphaera	2	143	158	0,9398	6	0,5403	0,9936	0,0053	DUO	+126
Uracil	Megasphaera	Metabolite	Bacteria	UracilMegasphaera	4	143	158	0,9849	4	0,4452	0,9997	0,0151	DUO	72hL
Uracil	Megasphaera	Metabolite	Bacteria	UracilMegasphaera	4	143	158	0,8341	6	0,0697	0,9814	0,0390	RUM	+126
Succinate	Megasphaera	Metabolite	Bacteria	SuccinateMegasphaera	3	140	158	0,9999	5	0,9977	10000	<,0001	RUM	+14
Succinate	Megasphaera	Metabolite	Bacteria	SuccinateMegasphaera	3	140	158	0,9955	7	0,9683	0,9994	<,0001	DUO	12hL
Succinate	Megasphaera	Metabolite	Bacteria	SuccinateMegasphaera	3	140	158	0,9953	6	0,9557	0,9995	<,0001	DUO	+126
Lysine	Megasphaera	Metabolite	Bacteria	LysineMegasphaera	2	140	158	0,9805	7	0,8694	0,9972	0,0001	DUO	12hL
Allantoin	Megasphaera	Metabolite	Bacteria	AllantoinMegasphaera	1	140	158	0,8907	7	0,4181	0,9838	0,0071	DUO	12hL
Lysine	Megasphaera	Metabolite	Bacteria	LysineMegasphaera	2	140	158	0,9192	6	0,4238	0,9913	0,0095	DUO	+126
4-Hydroxybutyrate	Megasphaera	Metabolite	Bacteria	4-HydroxybutyrateMegasphaera	4	139	158	0,9989	7	0,9923	0,9998	<,0001	DUO	12hL
Trimethylamine	Megasphaera	Metabolite	Bacteria	TrimethylamineMegasphaera	1	139	158	-0,9794	4	-0,9996	-0,3119	0,0206	DUO	+118
4-Hydroxybutyrate	Megasphaera	Metabolite	Bacteria	4-HydroxybutyrateMegasphaera	4	139	158	0,8523	6	0,1322	0,9835	0,0311	RUM	72hL
4-Hydroxybutyrate	Megasphaera	Metabolite	Bacteria	4-HydroxybutyrateMegasphaera	4	139	158	0,8447	6	0,1054	0,9826	0,0343	DUO	+126
4-Hydroxybutyrate	Megasphaera	Metabolite	Bacteria	4-HydroxybutyrateMegasphaera	4	139	158	0,9027	5	0,1004	0,9936	0,0359	RUM	24hL
Pimelate	Megasphaera	Metabolite	Bacteria	PimelateMegasphaera	2	137	158	0,9534	7	0,7103	0,9933	0,0009	DUO	12hL
Pimelate	Megasphaera	Metabolite	Bacteria	PimelateMegasphaera	2	137	158	0,9862	4	0,4823	0,9997	0,0138	DUO	72hL
N-nitrosodimethylamine	Megasphaera	Metabolite	Bacteria	N-nitrosodimethylamineMegasphaera	2	136	158	0,9909	7	0,9369	0,9987	<,0001	DUO	12hL
N-nitrosodimethylamine	Megasphaera	Metabolite	Bacteria	N-nitrosodimethylamineMegasphaera	2	136	158	0,8946	6	0,3031	0,9885	0,0161	DUO	+126
Phenylacetate	Megasphaera	Metabolite	Bacteria	PhenylacetateMegasphaera	3	134	158	0,9918	7	0,9429	0,9988	<,0001	DUO	12hL
Phenylacetate	Megasphaera	Metabolite	Bacteria	PhenylacetateMegasphaera	3	134	158	0,9950	5	0,9223	0,9997	0,0004	RUM	24hL
Phenylacetate	Megasphaera	Metabolite	Bacteria	PhenylacetateMegasphaera	3	134	158	0,9336	6	0,5038	0,9929	0,0065	DUO	+126
Caffeine	Megasphaera	Metabolite	Bacteria	CaffeineMegasphaera	2	133	158	0,9993	7	0,9949	0,9999	<,0001	DUO	12hL
Hypoxanthine	Megasphaera	Metabolite	Bacteria	HypoxanthineMegasphaera	2	133	158	0,9992	7	0,9940	0,9999	<,0001	DUO	12hL
Caffeine	Megasphaera	Metabolite	Bacteria	CaffeineMegasphaera	2	133	158	0,9999	6	0,9988	10000	<,0001	DUO	+126
Hypoxanthine	Megasphaera	Metabolite	Bacteria	HypoxanthineMegasphaera	2	133	158	0,9987	6	0,9877	0,9999	<,0001	DUO	+126
Valerate	Megasphaera	Metabolite	Bacteria	ValerateMegasphaera	2	133	158	0,9687	7	0,7972	0,9955	0,0003	DUO	12hL
Valerate	Megasphaera	Metabolite	Bacteria	ValerateMegasphaera	2	133	158	0,9574	4	-0,0461	0,9991	0,0426	DUO	+118
Acetone	Megasphaera	Metabolite	Bacteria	AcetoneMegasphaera	4	132	158	0,9891	7	0,9250	0,9985	<,0001	DUO	12hL
Acetone	Megasphaera	Metabolite	Bacteria	AcetoneMegasphaera	4	132	158	0,9564	6	0,6474	0,9954	0,0028	DUO	+126
Acetone	Megasphaera	Metabolite	Bacteria	AcetoneMegasphaera	4	132	158	0,9123	7	0,5087	0,9872	0,0042	DUO	24hC
Acetone	Megasphaera	Metabolite	Bacteria	AcetoneMegasphaera	4	132	158	0,8659	6	0,1829	0,9852	0,0258	RUM	+126
Benzoate	Megasphaera	Metabolite	Bacteria	BenzoateMegasphaera	3	131	158	0,9994	7	0,9959	0,9999	<,0001	DUO	12hL
Valine	Megasphaera	Metabolite	Bacteria	ValineMegasphaera	4	131	158	0,9928	7	0,9498	0,9990	<,0001	DUO	12hL
Benzoate	Megasphaera	Metabolite	Bacteria	BenzoateMegasphaera	3	131	158	0,9973	6	0,9748	0,9997	<,0001	DUO	+126
Valine	Megasphaera	Metabolite	Bacteria	ValineMegasphaera	4	131	158	0,9116	6	0,3847	0,9904	0,0114	DUO	+126
Valine	Megasphaera	Metabolite	Bacteria	ValineMegasphaera	4	131	158	0,8198	7	0,1743	0,9725	0,0240	DUO	24hC
Benzoate	Megasphaera	Metabolite	Bacteria	BenzoateMegasphaera	3	131	158	0,8652	6	0,1799	0,9851	0,0260	RUM	+126
Valine	Megasphaera	Metabolite	Bacteria	ValineMegasphaera	4	131	158	0,8549	6	0,1417	0,9839	0,0300	RUM	72hL
Carnitine	Megasphaera	Metabolite	Bacteria	CarnitineMegasphaera	2	130	158	0,9818	7	0,8774	0,9974	<,0001	DUO	24hC
Carnitine	Megasphaera	Metabolite	Bacteria	CarnitineMegasphaera	2	130	158	0,9924	7	0,9475	0,9989	<,0001	DUO	12hL
Glycerol	Megasphaera	Metabolite	Bacteria	GlycerolMegasphaera	4	130	158	0,9998	7	0,9985	10000	<,0001	DUO	12hL
Imidazole	Megasphaera	Metabolite	Bacteria	ImidazoleMegasphaera	3	130	158	0,9997	7	0,9982	10000	<,0001	DUO	12hL
Imidazole	Megasphaera	Metabolite	Bacteria	ImidazoleMegasphaera	3	130	158	0,9999	6	0,9994	10000	<,0001	DUO	+126
Alanine	Megasphaera	Metabolite	Bacteria	AlanineMegasphaera	1	130	158	0,9484	7	0,6835	0,9926	0,0011	DUO	12hL
Leucine	Megasphaera	Metabolite	Bacteria	LeucineMegasphaera	1	130	158	0,9303	7	0,5917	0,9899	0,0024	DUO	12hL
Glycerol	Megasphaera	Metabolite	Bacteria	GlycerolMegasphaera	4	130	158	0,9804	5	0,7265	0,9988	0,0033	RUM	24hL
Glycerol	Megasphaera	Metabolite	Bacteria	GlycerolMegasphaera	4	130	158	0,9504	6	0,6073	0,9947	0,0036	DUO	+126
Imidazole	Megasphaera	Metabolite	Bacteria	ImidazoleMegasphaera	3	130	158	0,9703	4	0,1371	0,9994	0,0297	DUO	72hL
Glycerol	Megasphaera	Metabolite	Bacteria	GlycerolMegasphaera	4	130	158	0,8424	6	0,0976	0,9824	0,0353	RUM	72hL
Dimethylamine	Megasphaera	Metabolite	Bacteria	DimethylamineMegasphaera	1	130	158	-0,7646	7	-0,9631	-0,0271	0,0453	DUO	24hC
Ethanol	Megasphaera	Metabolite	Bacteria	EthanolMegasphaera	3	129	158	0,9964	7	0,9750	0,9995	<,0001	DUO	12hL
Ethanol	Megasphaera	Metabolite	Bacteria	EthanolMegasphaera	3	129	158	0,9773	6	0,8016	0,9976	0,0008	DUO	+126
Ethanol	Megasphaera	Metabolite	Bacteria	EthanolMegasphaera	3	129	158	0,8903	7	0,4165	0,9838	0,0072	DUO	24hC
2-Phenylpropionate	Megasphaera	Metabolite	Bacteria	2-PhenylpropionateMegasphaera	2	127	158	0,9957	7	0,9698	0,9994	<,0001	DUO	12hL
N-Phenylacetylglycine	Megasphaera	Metabolite	Bacteria	N-PhenylacetylglycineMegasphaera	3	127	158	0,9983	7	0,9883	0,9998	<,0001	DUO	12hL
Glycine	Megasphaera	Metabolite	Bacteria	GlycineMegasphaera	2	127	158	0,9935	5	0,9011	0,9996	0,0006	RUM	24hL
2-Phenylpropionate	Megasphaera	Metabolite	Bacteria	2-PhenylpropionateMegasphaera	2	127	158	0,9684	6	0,7324	0,9967	0,0015	DUO	+126
Glycine	Megasphaera	Metabolite	Bacteria	GlycineMegasphaera	2	127	158	0,9982	4	0,9143	10000	0,0018	DUO	+118
N-Phenylacetylglycine	Megasphaera	Metabolite	Bacteria	N-PhenylacetylglycineMegasphaera	3	127	158	0,9643	6	0,7026	0,9962	0,0019	RUM	+126
N-Phenylacetylglycine	Megasphaera	Metabolite	Bacteria	N-PhenylacetylglycineMegasphaera	3	127	158	0,9389	6	0,5351	0,9935	0,0055	DUO	+126
Phenylalanine	Megasphaera	Metabolite	Bacteria	PhenylalanineMegasphaera	4	126	158	0,9996	7	0,9973	0,9999	<,0001	DUO	12hL
Butyrate	Megasphaera	Metabolite	Bacteria	ButyrateMegasphaera	3	126	158	0,9675	7	0,7903	0,9954	0,0004	DUO	12hL
Phenylalanine	Megasphaera	Metabolite	Bacteria	PhenylalanineMegasphaera	4	126	158	0,9328	6	0,4990	0,9928	0,0066	DUO	+126
Butyrate	Megasphaera	Metabolite	Bacteria	ButyrateMegasphaera	3	126	158	0,8934	7	0,4288	0,9843	0,0067	DUO	24hC
Phenylalanine	Megasphaera	Metabolite	Bacteria	PhenylalanineMegasphaera	4	126	158	0,9091	6	0,3720	0,9901	0,0120	RUM	+126
Butyrate	Megasphaera	Metabolite	Bacteria	ButyrateMegasphaera	3	126	158	0,9662	4	0,0710	0,9993	0,0338	DUO	+118
Phenylalanine	Megasphaera	Metabolite	Bacteria	PhenylalanineMegasphaera	4	126	158	0,7865	7	0,0820	0,9669	0,0359	DUO	24hC
Ferulate	Megasphaera	Metabolite	Bacteria	FerulateMegasphaera	4	124	158	0,9960	7	0,9719	0,9994	<,0001	DUO	12hL
Maltose	Megasphaera	Metabolite	Bacteria	MaltoseMegasphaera	4	124	158	0,9997	7	0,9981	10000	<,0001	DUO	12hL
Ferulate	Megasphaera	Metabolite	Bacteria	FerulateMegasphaera	4	124	158	0,9727	6	0,7654	0,9971	0,0011	DUO	+126
Maltose	Megasphaera	Metabolite	Bacteria	MaltoseMegasphaera	4	124	158	0,9882	5	0,8262	0,9993	0,0015	RUM	24hL
Maltose	Megasphaera	Metabolite	Bacteria	MaltoseMegasphaera	4	124	158	0,9664	6	0,7182	0,9965	0,0017	RUM	+126
Ferulate	Megasphaera	Metabolite	Bacteria	FerulateMegasphaera	4	124	158	0,9380	6	0,5296	0,9934	0,0056	RUM	+126
Maltose	Megasphaera	Metabolite	Bacteria	MaltoseMegasphaera	4	124	158	0,8768	6	0,2262	0,9864	0,0218	RUM	72hL
Ferulate	Megasphaera	Metabolite	Bacteria	FerulateMegasphaera	4	124	158	-0,7942	7	-0,9682	-0,1023	0,0329	DUO	+100
Nicotinate	Megasphaera	Metabolite	Bacteria	NicotinateMegasphaera	3	123	158	0,9999	7	0,9995	10000	<,0001	DUO	12hL
Nicotinate	Megasphaera	Metabolite	Bacteria	NicotinateMegasphaera	3	123	158	0,9999	6	0,9995	10000	<,0001	DUO	+126
Nicotinate	Megasphaera	Metabolite	Bacteria	NicotinateMegasphaera	3	123	158	0,8562	7	0,2903	0,9784	0,0139	DUO	24hC
3-Phenylpropionate	Megasphaera	Metabolite	Bacteria	3-PhenylpropionateMegasphaera	2	121	158	0,9990	7	0,9927	0,9999	<,0001	DUO	12hL
3-Phenylpropionate	Megasphaera	Metabolite	Bacteria	3-PhenylpropionateMegasphaera	2	121	158	0,9960	6	0,9626	0,9996	<,0001	DUO	+126
Methylamine	Megasphaera	Metabolite	Bacteria	MethylamineMegasphaera	2	120	158	0,9538	7	0,7127	0,9934	0,0009	DUO	12hL
Methylamine	Megasphaera	Metabolite	Bacteria	MethylamineMegasphaera	2	120	158	0,8877	6	0,2723	0,9877	0,0182	DUO	+126
Isovalerate	Megasphaera	Metabolite	Bacteria	IsovalerateMegasphaera	1	119	158	0,8697	7	0,3382	0,9806	0,0110	DUO	12hL
Methanol	Megasphaera	Metabolite	Bacteria	MethanolMegasphaera	3	118	158	0,9983	7	0,9880	0,9998	<,0001	DUO	12hL
Methanol	Megasphaera	Metabolite	Bacteria	MethanolMegasphaera	3	118	158	0,9991	6	0,9916	0,9999	<,0001	DUO	+126
Methanol	Megasphaera	Metabolite	Bacteria	MethanolMegasphaera	3	118	158	0,9186	5	0,1915	0,9947	0,0276	RUM	24hL
Histidine	Megasphaera	Metabolite	Bacteria	HistidineMegasphaera	3	116	158	0,9999	7	0,9995	10000	<,0001	DUO	12hL
Tyrosine	Megasphaera	Metabolite	Bacteria	TyrosineMegasphaera	4	116	158	0,9997	7	0,9981	10000	<,0001	DUO	12hL
Histidine	Megasphaera	Metabolite	Bacteria	HistidineMegasphaera	3	116	158	0,9998	6	0,9977	10000	<,0001	DUO	+126
Tyrosine	Megasphaera	Metabolite	Bacteria	TyrosineMegasphaera	4	116	158	0,9504	6	0,6071	0,9947	0,0036	RUM	+126
Tyrosine	Megasphaera	Metabolite	Bacteria	TyrosineMegasphaera	4	116	158	0,9343	6	0,5077	0,9930	0,0063	DUO	+126
Histidine	Megasphaera	Metabolite	Bacteria	HistidineMegasphaera	3	116	158	0,9172	6	0,4135	0,9911	0,0100	RUM	+126
Tyrosine	Megasphaera	Metabolite	Bacteria	TyrosineMegasphaera	4	116	158	0,8106	7	0,1477	0,9710	0,0270	DUO	24hC
Acetoacetate	Megasphaera	Metabolite	Bacteria	AcetoacetateMegasphaera	1	115	158	0,9793	7	0,8615	0,9971	0,0001	DUO	12hL
Glutamate	Megasphaera	Metabolite	Bacteria	GlutamateMegasphaera	3	114	158	0,9845	7	0,8950	0,9978	<,0001	DUO	12hL
Xanthine	Megasphaera	Metabolite	Bacteria	XanthineMegasphaera	2	114	158	0,9997	7	0,9980	10000	<,0001	DUO	12hL
Xanthine	Megasphaera	Metabolite	Bacteria	XanthineMegasphaera	2	114	158	0,9951	6	0,9534	0,9995	<,0001	DUO	+126
Glutamate	Megasphaera	Metabolite	Bacteria	GlutamateMegasphaera	3	114	158	0,9596	6	0,6693	0,9957	0,0024	RUM	72hL
Glutamate	Megasphaera	Metabolite	Bacteria	GlutamateMegasphaera	3	114	158	0,9355	6	0,5149	0,9931	0,0061	DUO	+126
3-Hydroxybutyrate	Megasphaera	Metabolite	Bacteria	3-HydroxybutyrateMegasphaera	3	112	158	0,9870	7	0,9115	0,9982	<,0001	DUO	12hL
Acetate	Megasphaera	Metabolite	Bacteria	AcetateMegasphaera	2	112	158	0,9998	4	0,9877	10000	0,0002	DUO	+118
3-Hydroxybutyrate	Megasphaera	Metabolite	Bacteria	3-HydroxybutyrateMegasphaera	3	112	158	0,9475	6	0,5884	0,9944	0,0041	DUO	+126
3-Hydroxybutyrate	Megasphaera	Metabolite	Bacteria	3-HydroxybutyrateMegasphaera	3	112	158	0,8508	7	0,2721	0,9775	0,0152	DUO	24hC
Acetate	Megasphaera	Metabolite	Bacteria	AcetateMegasphaera	2	112	158	0,7814	7	0,0688	0,9660	0,0380	DUO	24hC
Glucose	Megasphaera	Metabolite	Bacteria	GlucoseMegasphaera	2	110	158	0,9997	7	0,9977	10000	<,0001	DUO	12hL
Ornithine	Megasphaera	Metabolite	Bacteria	OrnithineMegasphaera	3	110	158	0,9433	7	0,6568	0,9918	0,0014	DUO	12hL
Ornithine	Megasphaera	Metabolite	Bacteria	OrnithineMegasphaera	3	110	158	0,9465	6	0,5823	0,9943	0,0042	DUO	+126
Ornithine	Megasphaera	Metabolite	Bacteria	OrnithineMegasphaera	3	110	158	0,9757	5	0,6711	0,9985	0,0045	RUM	24hL
Glucose	Megasphaera	Metabolite	Bacteria	GlucoseMegasphaera	2	110	158	0,8575	6	0,1511	0,9842	0,0290	DUO	+126
Adipate	Megasphaera	Metabolite	Bacteria	AdipateMegasphaera	1	109	158	0,9894	7	0,9270	0,9985	<,0001	DUO	12hL
Isoleucine	Megasphaera	Metabolite	Bacteria	IsoleucineMegasphaera	2	109	158	0,9723	7	0,8185	0,9960	0,0002	DUO	24hC
Isoleucine	Megasphaera	Metabolite	Bacteria	IsoleucineMegasphaera	2	109	158	0,9676	7	0,7909	0,9954	0,0004	DUO	12hL
Propionate	Megasphaera	Metabolite	Bacteria	PropionateMegasphaera	1	109	158	0,9586	4	-0,0317	0,9992	0,0414	DUO	+118
Isobutyrate	Megasphaera	Metabolite	Bacteria	IsobutyrateMegasphaera	3	103	158	0,9872	5	0,8128	0,9992	0,0017	RUM	+14
Isobutyrate	Megasphaera	Metabolite	Bacteria	IsobutyrateMegasphaera	3	103	158	0,7864	7	0,0817	0,9669	0,0360	DUO	12hL
Isobutyrate	Megasphaera	Metabolite	Bacteria	IsobutyrateMegasphaera	3	103	158	0,9618	4	0,0092	0,9992	0,0382	DUO	72hL
3-Hydroxyphenylacetate	Megasphaera	Metabolite	Bacteria	3-HydroxyphenylacetateMegasphaera	3	101	158	0,9991	7	0,9938	0,9999	<,0001	DUO	12hL
3-Hydroxyphenylacetate	Megasphaera	Metabolite	Bacteria	3-HydroxyphenylacetateMegasphaera	3	101	158	0,9829	6	0,8473	0,9982	0,0004	DUO	+126
3-Hydroxyphenylacetate	Megasphaera	Metabolite	Bacteria	3-HydroxyphenylacetateMegasphaera	3	101	158	0,8758	6	0,2220	0,9863	0,0222	RUM	+126
Formate	Uncl. Anaeroplasmataceae	Metabolite	Bacteria	FormateUncl. Anaeroplasmataceae	3	178	157	0,9997	6	0,9967	10000	<,0001	DUO	-42
Formate	Uncl. Anaeroplasmataceae	Metabolite	Bacteria	FormateUncl. Anaeroplasmataceae	3	178	157	0,9713	6	0,7543	0,9970	0,0012	DUO	+126
Formate	Uncl. Anaeroplasmataceae	Metabolite	Bacteria	FormateUncl. Anaeroplasmataceae	3	178	157	0,8572	7	0,2937	0,9786	0,0137	RUM	-42
Choline	Uncl. Anaeroplasmataceae	Metabolite	Bacteria	CholineUncl. Anaeroplasmataceae	3	173	157	0,9998	6	0,9984	10000	<,0001	DUO	-42
Choline	Uncl. Anaeroplasmataceae	Metabolite	Bacteria	CholineUncl. Anaeroplasmataceae	3	173	157	0,8495	6	0,1222	0,9832	0,0323	RUM	72hC
Choline	Uncl. Anaeroplasmataceae	Metabolite	Bacteria	CholineUncl. Anaeroplasmataceae	3	173	157	0,8397	6	0,0884	0,9820	0,0365	DUO	+126
Fumarate	Uncl. Anaeroplasmataceae	Metabolite	Bacteria	FumarateUncl. Anaeroplasmataceae	4	166	157	0,9873	6	0,8845	0,9987	0,0002	DUO	-42
Fumarate	Uncl. Anaeroplasmataceae	Metabolite	Bacteria	FumarateUncl. Anaeroplasmataceae	4	166	157	0,9714	6	0,7549	0,9970	0,0012	DUO	+126
Fumarate	Uncl. Anaeroplasmataceae	Metabolite	Bacteria	FumarateUncl. Anaeroplasmataceae	4	166	157	0,8522	6	0,1317	0,9835	0,0312	RUM	24hC
Fumarate	Uncl. Anaeroplasmataceae	Metabolite	Bacteria	FumarateUncl. Anaeroplasmataceae	4	166	157	0,9542	4	-0,0835	0,9991	0,0458	DUO	72hL
Proline	Uncl. Anaeroplasmataceae	Metabolite	Bacteria	ProlineUncl. Anaeroplasmataceae	4	165	157	10000	6	0,9999	10000	<,0001	DUO	-42
Proline	Uncl. Anaeroplasmataceae	Metabolite	Bacteria	ProlineUncl. Anaeroplasmataceae	4	165	157	0,9924	7	0,9474	0,9989	<,0001	DUO	24hC
Proline	Uncl. Anaeroplasmataceae	Metabolite	Bacteria	ProlineUncl. Anaeroplasmataceae	4	165	157	0,9764	6	0,7939	0,9975	0,0008	DUO	+126
Proline	Uncl. Anaeroplasmataceae	Metabolite	Bacteria	ProlineUncl. Anaeroplasmataceae	4	165	157	0,9415	6	0,5511	0,9938	0,0050	RUM	72hC
Aspartate	Uncl. Anaeroplasmataceae	Metabolite	Bacteria	AspartateUncl. Anaeroplasmataceae	5	159	157	0,9996	6	0,9963	10000	<,0001	DUO	-42
Aspartate	Uncl. Anaeroplasmataceae	Metabolite	Bacteria	AspartateUncl. Anaeroplasmataceae	5	159	157	0,9566	5	0,4768	0,9972	0,0108	RUM	24hL
Aspartate	Uncl. Anaeroplasmataceae	Metabolite	Bacteria	AspartateUncl. Anaeroplasmataceae	5	159	157	0,8766	6	0,2253	0,9864	0,0219	DUO	+126
Aspartate	Uncl. Anaeroplasmataceae	Metabolite	Bacteria	AspartateUncl. Anaeroplasmataceae	5	159	157	0,7995	7	0,1167	0,9691	0,0309	RUM	-42
Aspartate	Uncl. Anaeroplasmataceae	Metabolite	Bacteria	AspartateUncl. Anaeroplasmataceae	5	159	157	0,8470	6	0,1135	0,9829	0,0333	RUM	72hC
Ribose	Uncl. Anaeroplasmataceae	Metabolite	Bacteria	RiboseUncl. Anaeroplasmataceae	5	158	157	0,9998	6	0,9979	10000	<,0001	DUO	-42
Ribose	Uncl. Anaeroplasmataceae	Metabolite	Bacteria	RiboseUncl. Anaeroplasmataceae	5	158	157	0,9587	6	0,6631	0,9956	0,0025	DUO	+126
Ribose	Uncl. Anaeroplasmataceae	Metabolite	Bacteria	RiboseUncl. Anaeroplasmataceae	5	158	157	0,9807	5	0,7310	0,9988	0,0032	DUO	12hC
Ribose	Uncl. Anaeroplasmataceae	Metabolite	Bacteria	RiboseUncl. Anaeroplasmataceae	5	158	157	0,9675	5	0,5822	0,9979	0,0070	RUM	24hL
Ribose	Uncl. Anaeroplasmataceae	Metabolite	Bacteria	RiboseUncl. Anaeroplasmataceae	5	158	157	0,7992	7	0,1159	0,9690	0,0310	DUO	24hC
1,3-Dihydroxyacetone	Uncl. Anaeroplasmataceae	Metabolite	Bacteria	1,3-DihydroxyacetoneUncl. Anaeroplasmataceae	6	154	157	0,9999	6	0,9995	10000	<,0001	DUO	-42
Isopropanol	Uncl. Anaeroplasmataceae	Metabolite	Bacteria	IsopropanolUncl. Anaeroplasmataceae	3	154	157	0,9990	6	0,9906	0,9999	<,0001	DUO	-42
1,3-Dihydroxyacetone	Uncl. Anaeroplasmataceae	Metabolite	Bacteria	1,3-DihydroxyacetoneUncl. Anaeroplasmataceae	6	154	157	0,9705	6	0,7482	0,9969	0,0013	DUO	+126
1,3-Dihydroxyacetone	Uncl. Anaeroplasmataceae	Metabolite	Bacteria	1,3-DihydroxyacetoneUncl. Anaeroplasmataceae	6	154	157	0,9635	6	0,6970	0,9961	0,0020	RUM	72hC
Isopropanol	Uncl. Anaeroplasmataceae	Metabolite	Bacteria	IsopropanolUncl. Anaeroplasmataceae	3	154	157	0,9619	6	0,6852	0,9960	0,0022	DUO	+126
Isopropanol	Uncl. Anaeroplasmataceae	Metabolite	Bacteria	IsopropanolUncl. Anaeroplasmataceae	3	154	157	0,9792	5	0,7124	0,9987	0,0036	RUM	24hL
1,3-Dihydroxyacetone	Uncl. Anaeroplasmataceae	Metabolite	Bacteria	1,3-DihydroxyacetoneUncl. Anaeroplasmataceae	6	154	157	0,8888	7	0,4104	0,9835	0,0075	DUO	24hC
1,3-Dihydroxyacetone	Uncl. Anaeroplasmataceae	Metabolite	Bacteria	1,3-DihydroxyacetoneUncl. Anaeroplasmataceae	6	154	157	0,8464	7	0,2573	0,9768	0,0163	RUM	-42
1,3-Dihydroxyacetone	Uncl. Anaeroplasmataceae	Metabolite	Bacteria	1,3-DihydroxyacetoneUncl. Anaeroplasmataceae	6	154	157	0,9198	5	0,1992	0,9948	0,0269	DUO	12hC
Lactate	Uncl. Anaeroplasmataceae	Metabolite	Bacteria	LactateUncl. Anaeroplasmataceae	2	153	157	0,9980	6	0,9807	0,9998	<,0001	DUO	-42
Lactate	Uncl. Anaeroplasmataceae	Metabolite	Bacteria	LactateUncl. Anaeroplasmataceae	2	153	157	0,9723	5	0,6336	0,9982	0,0055	RUM	24hL
Serine	Uncl. Anaeroplasmataceae	Metabolite	Bacteria	SerineUncl. Anaeroplasmataceae	4	152	157	10000	6	0,9998	10000	<,0001	DUO	-42
Serine	Uncl. Anaeroplasmataceae	Metabolite	Bacteria	SerineUncl. Anaeroplasmataceae	4	152	157	0,9644	6	0,7034	0,9962	0,0019	RUM	72hC
Serine	Uncl. Anaeroplasmataceae	Metabolite	Bacteria	SerineUncl. Anaeroplasmataceae	4	152	157	0,9375	6	0,5268	0,9933	0,0057	DUO	+126
Serine	Uncl. Anaeroplasmataceae	Metabolite	Bacteria	SerineUncl. Anaeroplasmataceae	4	152	157	-0,9652	4	-0,9993	-0,0570	0,0348	DUO	72hL
Cadaverine	Uncl. Anaeroplasmataceae	Metabolite	Bacteria	CadaverineUncl. Anaeroplasmataceae	3	143	157	0,9950	6	0,9533	0,9995	<,0001	DUO	-42
Uracil	Uncl. Anaeroplasmataceae	Metabolite	Bacteria	UracilUncl. Anaeroplasmataceae	2	143	157	0,9959	6	0,9608	0,9996	<,0001	DUO	-42
Uracil	Uncl. Anaeroplasmataceae	Metabolite	Bacteria	UracilUncl. Anaeroplasmataceae	2	143	157	0,9710	6	0,7524	0,9969	0,0012	DUO	+126
Cadaverine	Uncl. Anaeroplasmataceae	Metabolite	Bacteria	CadaverineUncl. Anaeroplasmataceae	3	143	157	0,9762	5	0,6769	0,9985	0,0044	RUM	24hL
Cadaverine	Uncl. Anaeroplasmataceae	Metabolite	Bacteria	CadaverineUncl. Anaeroplasmataceae	3	143	157	0,8955	6	0,3073	0,9886	0,0158	DUO	+126
Lysine	Uncl. Anaeroplasmataceae	Metabolite	Bacteria	LysineUncl. Anaeroplasmataceae	3	140	157	0,9979	6	0,9804	0,9998	<,0001	DUO	-42
Succinate	Uncl. Anaeroplasmataceae	Metabolite	Bacteria	SuccinateUncl. Anaeroplasmataceae	3	140	157	0,9997	6	0,9975	10000	<,0001	DUO	-42
Succinate	Uncl. Anaeroplasmataceae	Metabolite	Bacteria	SuccinateUncl. Anaeroplasmataceae	3	140	157	0,9880	6	0,8899	0,9987	0,0002	DUO	+126
Succinate	Uncl. Anaeroplasmataceae	Metabolite	Bacteria	SuccinateUncl. Anaeroplasmataceae	3	140	157	0,9797	5	0,7187	0,9987	0,0035	DUO	12hC
Allantoin	Uncl. Anaeroplasmataceae	Metabolite	Bacteria	AllantoinUncl. Anaeroplasmataceae	3	140	157	0,9330	6	0,5001	0,9928	0,0066	RUM	72hC
Lysine	Uncl. Anaeroplasmataceae	Metabolite	Bacteria	LysineUncl. Anaeroplasmataceae	3	140	157	0,9613	5	0,5201	0,9975	0,0091	RUM	24hL
Allantoin	Uncl. Anaeroplasmataceae	Metabolite	Bacteria	AllantoinUncl. Anaeroplasmataceae	3	140	157	0,9080	6	0,3664	0,9900	0,0123	RUM	24hC
Lysine	Uncl. Anaeroplasmataceae	Metabolite	Bacteria	LysineUncl. Anaeroplasmataceae	3	140	157	0,8692	6	0,1955	0,9855	0,0246	DUO	+126
Allantoin	Uncl. Anaeroplasmataceae	Metabolite	Bacteria	AllantoinUncl. Anaeroplasmataceae	3	140	157	0,8959	5	0,0650	0,9932	0,0397	DUO	12hC
4-Hydroxybutyrate	Uncl. Anaeroplasmataceae	Metabolite	Bacteria	4-HydroxybutyrateUncl. Anaeroplasmataceae	3	139	157	0,9999	6	0,9995	10000	<,0001	DUO	-42
Trimethylamine	Uncl. Anaeroplasmataceae	Metabolite	Bacteria	TrimethylamineUncl. Anaeroplasmataceae	2	139	157	0,9377	5	0,3209	0,9960	0,0185	DUO	24hL
Trimethylamine	Uncl. Anaeroplasmataceae	Metabolite	Bacteria	TrimethylamineUncl. Anaeroplasmataceae	2	139	157	0,9055	5	0,1155	0,9938	0,0344	RUM	24hL
4-Hydroxybutyrate	Uncl. Anaeroplasmataceae	Metabolite	Bacteria	4-HydroxybutyrateUncl. Anaeroplasmataceae	3	139	157	0,7749	7	0,0525	0,9649	0,0407	RUM	-42
4-Hydroxybutyrate	Uncl. Anaeroplasmataceae	Metabolite	Bacteria	4-HydroxybutyrateUncl. Anaeroplasmataceae	3	139	157	0,7580	7	0,0116	0,9620	0,0483	DUO	24hC
Pimelate	Uncl. Anaeroplasmataceae	Metabolite	Bacteria	PimelateUncl. Anaeroplasmataceae	3	137	157	0,9939	6	0,9432	0,9994	<,0001	DUO	-42
Pimelate	Uncl. Anaeroplasmataceae	Metabolite	Bacteria	PimelateUncl. Anaeroplasmataceae	3	137	157	-0,8721	6	-0,9859	-0,2073	0,0235	RUM	24hC
Pimelate	Uncl. Anaeroplasmataceae	Metabolite	Bacteria	PimelateUncl. Anaeroplasmataceae	3	137	157	0,9065	5	0,1208	0,9939	0,0339	RUM	24hL
N-nitrosodimethylamine	Uncl. Anaeroplasmataceae	Metabolite	Bacteria	N-nitrosodimethylamineUncl. Anaeroplasmataceae	2	136	157	0,9990	6	0,9906	0,9999	<,0001	DUO	-42
N-nitrosodimethylamine	Uncl. Anaeroplasmataceae	Metabolite	Bacteria	N-nitrosodimethylamineUncl. Anaeroplasmataceae	2	136	157	0,8414	6	0,0942	0,9822	0,0357	DUO	+126
Phenylacetate	Uncl. Anaeroplasmataceae	Metabolite	Bacteria	PhenylacetateUncl. Anaeroplasmataceae	3	134	157	0,9938	6	0,9416	0,9993	<,0001	DUO	-42
Phenylacetate	Uncl. Anaeroplasmataceae	Metabolite	Bacteria	PhenylacetateUncl. Anaeroplasmataceae	3	134	157	0,8810	6	0,2436	0,9869	0,0204	DUO	+126
Phenylacetate	Uncl. Anaeroplasmataceae	Metabolite	Bacteria	PhenylacetateUncl. Anaeroplasmataceae	3	134	157	-0,8243	6	-0,9802	-0,0385	0,0436	RUM	12hL
Caffeine	Uncl. Anaeroplasmataceae	Metabolite	Bacteria	CaffeineUncl. Anaeroplasmataceae	3	133	157	10000	6	0,9999	10000	<,0001	DUO	-42
Hypoxanthine	Uncl. Anaeroplasmataceae	Metabolite	Bacteria	HypoxanthineUncl. Anaeroplasmataceae	3	133	157	0,9999	6	0,9995	10000	<,0001	DUO	-42
Valerate	Uncl. Anaeroplasmataceae	Metabolite	Bacteria	ValerateUncl. Anaeroplasmataceae	3	133	157	0,9930	6	0,9345	0,9993	<,0001	DUO	-42
Caffeine	Uncl. Anaeroplasmataceae	Metabolite	Bacteria	CaffeineUncl. Anaeroplasmataceae	3	133	157	0,9730	6	0,7674	0,9972	0,0011	DUO	+126
Hypoxanthine	Uncl. Anaeroplasmataceae	Metabolite	Bacteria	HypoxanthineUncl. Anaeroplasmataceae	3	133	157	0,9712	6	0,7535	0,9970	0,0012	DUO	+126
Valerate	Uncl. Anaeroplasmataceae	Metabolite	Bacteria	ValerateUncl. Anaeroplasmataceae	3	133	157	0,9213	5	0,2089	0,9949	0,0262	RUM	24hL
Caffeine	Uncl. Anaeroplasmataceae	Metabolite	Bacteria	CaffeineUncl. Anaeroplasmataceae	3	133	157	0,7990	7	0,1154	0,9690	0,0311	RUM	-42
Valerate	Uncl. Anaeroplasmataceae	Metabolite	Bacteria	ValerateUncl. Anaeroplasmataceae	3	133	157	-0,8503	6	-0,9833	-0,1250	0,0319	RUM	24hC
Hypoxanthine	Uncl. Anaeroplasmataceae	Metabolite	Bacteria	HypoxanthineUncl. Anaeroplasmataceae	3	133	157	0,7961	7	0,1074	0,9685	0,0322	RUM	-42
Acetone	Uncl. Anaeroplasmataceae	Metabolite	Bacteria	AcetoneUncl. Anaeroplasmataceae	2	132	157	0,9975	6	0,9764	0,9997	<,0001	DUO	-42
Acetone	Uncl. Anaeroplasmataceae	Metabolite	Bacteria	AcetoneUncl. Anaeroplasmataceae	2	132	157	0,9191	6	0,4230	0,9913	0,0096	DUO	+126
Benzoate	Uncl. Anaeroplasmataceae	Metabolite	Bacteria	BenzoateUncl. Anaeroplasmataceae	2	131	157	0,9996	6	0,9958	10000	<,0001	DUO	-42
Valine	Uncl. Anaeroplasmataceae	Metabolite	Bacteria	ValineUncl. Anaeroplasmataceae	3	131	157	0,9997	6	0,9972	10000	<,0001	DUO	-42
Benzoate	Uncl. Anaeroplasmataceae	Metabolite	Bacteria	BenzoateUncl. Anaeroplasmataceae	2	131	157	0,9690	6	0,7371	0,9967	0,0014	DUO	+126
Valine	Uncl. Anaeroplasmataceae	Metabolite	Bacteria	ValineUncl. Anaeroplasmataceae	3	131	157	0,8598	6	0,1596	0,9844	0,0281	DUO	+126
Valine	Uncl. Anaeroplasmataceae	Metabolite	Bacteria	ValineUncl. Anaeroplasmataceae	3	131	157	0,9107	5	0,1448	0,9942	0,0316	RUM	24hL
Alanine	Uncl. Anaeroplasmataceae	Metabolite	Bacteria	AlanineUncl. Anaeroplasmataceae	2	130	157	0,9947	6	0,9497	0,9994	<,0001	DUO	-42
Carnitine	Uncl. Anaeroplasmataceae	Metabolite	Bacteria	CarnitineUncl. Anaeroplasmataceae	1	130	157	10000	6	0,9997	10000	<,0001	DUO	-42
Glycerol	Uncl. Anaeroplasmataceae	Metabolite	Bacteria	GlycerolUncl. Anaeroplasmataceae	2	130	157	10000	6	0,9999	10000	<,0001	DUO	-42
Imidazole	Uncl. Anaeroplasmataceae	Metabolite	Bacteria	ImidazoleUncl. Anaeroplasmataceae	3	130	157	0,9999	6	0,9992	10000	<,0001	DUO	-42
Leucine	Uncl. Anaeroplasmataceae	Metabolite	Bacteria	LeucineUncl. Anaeroplasmataceae	2	130	157	0,9949	6	0,9518	0,9995	<,0001	DUO	-42
Imidazole	Uncl. Anaeroplasmataceae	Metabolite	Bacteria	ImidazoleUncl. Anaeroplasmataceae	3	130	157	0,9739	6	0,7743	0,9973	0,0010	DUO	+126
Glycerol	Uncl. Anaeroplasmataceae	Metabolite	Bacteria	GlycerolUncl. Anaeroplasmataceae	2	130	157	0,9068	6	0,3606	0,9899	0,0126	DUO	+126
Dimethylamine	Uncl. Anaeroplasmataceae	Metabolite	Bacteria	DimethylamineUncl. Anaeroplasmataceae	2	130	157	0,8608	7	0,3062	0,9791	0,0129	RUM	-42
Imidazole	Uncl. Anaeroplasmataceae	Metabolite	Bacteria	ImidazoleUncl. Anaeroplasmataceae	3	130	157	0,8451	7	0,2532	0,9766	0,0167	RUM	-42
Leucine	Uncl. Anaeroplasmataceae	Metabolite	Bacteria	LeucineUncl. Anaeroplasmataceae	2	130	157	0,9145	5	0,1671	0,9944	0,0296	RUM	24hL
Alanine	Uncl. Anaeroplasmataceae	Metabolite	Bacteria	AlanineUncl. Anaeroplasmataceae	2	130	157	0,9138	5	0,1624	0,9944	0,0300	RUM	24hL
Dimethylamine	Uncl. Anaeroplasmataceae	Metabolite	Bacteria	DimethylamineUncl. Anaeroplasmataceae	2	130	157	0,8808	5	-0,0067	0,9921	0,0485	DUO	24hL
Ethanol	Uncl. Anaeroplasmataceae	Metabolite	Bacteria	EthanolUncl. Anaeroplasmataceae	3	129	157	0,9998	6	0,9979	10000	<,0001	DUO	-42
Ethanol	Uncl. Anaeroplasmataceae	Metabolite	Bacteria	EthanolUncl. Anaeroplasmataceae	3	129	157	0,9426	6	0,5577	0,9939	0,0048	DUO	+126
Ethanol	Uncl. Anaeroplasmataceae	Metabolite	Bacteria	EthanolUncl. Anaeroplasmataceae	3	129	157	0,8969	5	0,0700	0,9932	0,0391	RUM	24hL
2-Phenylpropionate	Uncl. Anaeroplasmataceae	Metabolite	Bacteria	2-PhenylpropionateUncl. Anaeroplasmataceae	2	127	157	0,9984	6	0,9843	0,9998	<,0001	DUO	-42
N-Phenylacetylglycine	Uncl. Anaeroplasmataceae	Metabolite	Bacteria	N-PhenylacetylglycineUncl. Anaeroplasmataceae	2	127	157	10000	6	0,9999	10000	<,0001	DUO	-42
2-Phenylpropionate	Uncl. Anaeroplasmataceae	Metabolite	Bacteria	2-PhenylpropionateUncl. Anaeroplasmataceae	2	127	157	0,9371	6	0,5244	0,9933	0,0058	DUO	+126
N-Phenylacetylglycine	Uncl. Anaeroplasmataceae	Metabolite	Bacteria	N-PhenylacetylglycineUncl. Anaeroplasmataceae	2	127	157	0,8915	6	0,2890	0,9881	0,0170	DUO	+126
Glycine	Uncl. Anaeroplasmataceae	Metabolite	Bacteria	GlycineUncl. Anaeroplasmataceae	1	127	157	0,8255	6	0,0421	0,9803	0,0430	DUO	-42
Butyrate	Uncl. Anaeroplasmataceae	Metabolite	Bacteria	ButyrateUncl. Anaeroplasmataceae	2	126	157	0,9970	6	0,9713	0,9997	<,0001	DUO	-42
Phenylalanine	Uncl. Anaeroplasmataceae	Metabolite	Bacteria	PhenylalanineUncl. Anaeroplasmataceae	3	126	157	0,9990	6	0,9902	0,9999	<,0001	DUO	-42
Phenylalanine	Uncl. Anaeroplasmataceae	Metabolite	Bacteria	PhenylalanineUncl. Anaeroplasmataceae	3	126	157	0,8798	6	0,2388	0,9868	0,0208	DUO	+126
Butyrate	Uncl. Anaeroplasmataceae	Metabolite	Bacteria	ButyrateUncl. Anaeroplasmataceae	2	126	157	0,9011	5	0,0916	0,9935	0,0368	RUM	24hL
Phenylalanine	Uncl. Anaeroplasmataceae	Metabolite	Bacteria	PhenylalanineUncl. Anaeroplasmataceae	3	126	157	-0,9544	4	-0,9991	0,0813	0,0456	DUO	72hL
Ferulate	Uncl. Anaeroplasmataceae	Metabolite	Bacteria	FerulateUncl. Anaeroplasmataceae	3	124	157	0,9928	6	0,9327	0,9992	<,0001	DUO	-42
Maltose	Uncl. Anaeroplasmataceae	Metabolite	Bacteria	MaltoseUncl. Anaeroplasmataceae	2	124	157	0,9950	6	0,9531	0,9995	<,0001	DUO	-42
Ferulate	Uncl. Anaeroplasmataceae	Metabolite	Bacteria	FerulateUncl. Anaeroplasmataceae	3	124	157	0,9398	6	0,5407	0,9936	0,0053	DUO	+126
Maltose	Uncl. Anaeroplasmataceae	Metabolite	Bacteria	MaltoseUncl. Anaeroplasmataceae	2	124	157	0,9366	6	0,5213	0,9932	0,0059	RUM	+118
Ferulate	Uncl. Anaeroplasmataceae	Metabolite	Bacteria	FerulateUncl. Anaeroplasmataceae	3	124	157	-0,7990	7	-0,9690	-0,1153	0,0311	DUO	+100
Nicotinate	Uncl. Anaeroplasmataceae	Metabolite	Bacteria	NicotinateUncl. Anaeroplasmataceae	3	123	157	10000	6	10000	10000	<,0001	DUO	-42
Nicotinate	Uncl. Anaeroplasmataceae	Metabolite	Bacteria	NicotinateUncl. Anaeroplasmataceae	3	123	157	0,9754	6	0,7859	0,9974	0,0009	DUO	+126
Nicotinate	Uncl. Anaeroplasmataceae	Metabolite	Bacteria	NicotinateUncl. Anaeroplasmataceae	3	123	157	0,8447	7	0,2517	0,9766	0,0168	RUM	-42
3-Phenylpropionate	Uncl. Anaeroplasmataceae	Metabolite	Bacteria	3-PhenylpropionateUncl. Anaeroplasmataceae	3	121	157	0,9996	6	0,9957	10000	<,0001	DUO	-42
3-Phenylpropionate	Uncl. Anaeroplasmataceae	Metabolite	Bacteria	3-PhenylpropionateUncl. Anaeroplasmataceae	3	121	157	0,9815	6	0,8352	0,9981	0,0005	DUO	+126
3-Phenylpropionate	Uncl. Anaeroplasmataceae	Metabolite	Bacteria	3-PhenylpropionateUncl. Anaeroplasmataceae	3	121	157	0,9338	5	0,2929	0,9957	0,0202	DUO	12hC
Methylamine	Uncl. Anaeroplasmataceae	Metabolite	Bacteria	MethylamineUncl. Anaeroplasmataceae	4	120	157	0,9972	6	0,9738	0,9997	<,0001	DUO	-42
Methylamine	Uncl. Anaeroplasmataceae	Metabolite	Bacteria	MethylamineUncl. Anaeroplasmataceae	4	120	157	0,8772	7	0,3659	0,9817	0,0095	RUM	-42
Methylamine	Uncl. Anaeroplasmataceae	Metabolite	Bacteria	MethylamineUncl. Anaeroplasmataceae	4	120	157	0,8633	6	0,1728	0,9849	0,0268	DUO	+126
Methylamine	Uncl. Anaeroplasmataceae	Metabolite	Bacteria	MethylamineUncl. Anaeroplasmataceae	4	120	157	0,8859	5	0,0168	0,9925	0,0454	RUM	24hL
Isovalerate	Uncl. Anaeroplasmataceae	Metabolite	Bacteria	IsovalerateUncl. Anaeroplasmataceae	2	119	157	0,9845	6	0,8600	0,9984	0,0004	DUO	-42
Isovalerate	Uncl. Anaeroplasmataceae	Metabolite	Bacteria	IsovalerateUncl. Anaeroplasmataceae	2	119	157	-0,8478	6	-0,9830	-0,1162	0,0330	RUM	12hL
Methanol	Uncl. Anaeroplasmataceae	Metabolite	Bacteria	MethanolUncl. Anaeroplasmataceae	3	118	157	10000	6	0,9998	10000	<,0001	DUO	-42
Methanol	Uncl. Anaeroplasmataceae	Metabolite	Bacteria	MethanolUncl. Anaeroplasmataceae	3	118	157	0,9829	6	0,8468	0,9982	0,0004	DUO	+126
Methanol	Uncl. Anaeroplasmataceae	Metabolite	Bacteria	MethanolUncl. Anaeroplasmataceae	3	118	157	0,8430	7	0,2462	0,9763	0,0172	RUM	-42
Histidine	Uncl. Anaeroplasmataceae	Metabolite	Bacteria	HistidineUncl. Anaeroplasmataceae	4	116	157	0,9999	6	0,9994	10000	<,0001	DUO	-42
Tyrosine	Uncl. Anaeroplasmataceae	Metabolite	Bacteria	TyrosineUncl. Anaeroplasmataceae	3	116	157	0,9994	6	0,9941	0,9999	<,0001	DUO	-42
Histidine	Uncl. Anaeroplasmataceae	Metabolite	Bacteria	HistidineUncl. Anaeroplasmataceae	4	116	157	0,9726	6	0,7643	0,9971	0,0011	DUO	+126
Tyrosine	Uncl. Anaeroplasmataceae	Metabolite	Bacteria	TyrosineUncl. Anaeroplasmataceae	3	116	157	0,8939	6	0,2999	0,9884	0,0163	DUO	+126
Histidine	Uncl. Anaeroplasmataceae	Metabolite	Bacteria	HistidineUncl. Anaeroplasmataceae	4	116	157	0,9231	5	0,2202	0,9950	0,0253	DUO	12hC
Histidine	Uncl. Anaeroplasmataceae	Metabolite	Bacteria	HistidineUncl. Anaeroplasmataceae	4	116	157	-0,8497	6	-0,9832	-0,1227	0,0322	RUM	12hL
Tyrosine	Uncl. Anaeroplasmataceae	Metabolite	Bacteria	TyrosineUncl. Anaeroplasmataceae	3	116	157	0,8191	6	0,0225	0,9795	0,0461	RUM	24hC
Acetoacetate	Uncl. Anaeroplasmataceae	Metabolite	Bacteria	AcetoacetateUncl. Anaeroplasmataceae	1	115	157	0,9982	6	0,9824	0,9998	<,0001	DUO	-42
Glutamate	Uncl. Anaeroplasmataceae	Metabolite	Bacteria	GlutamateUncl. Anaeroplasmataceae	3	114	157	0,9987	6	0,9880	0,9999	<,0001	DUO	-42
Xanthine	Uncl. Anaeroplasmataceae	Metabolite	Bacteria	XanthineUncl. Anaeroplasmataceae	2	114	157	0,9988	6	0,9888	0,9999	<,0001	DUO	-42
Xanthine	Uncl. Anaeroplasmataceae	Metabolite	Bacteria	XanthineUncl. Anaeroplasmataceae	2	114	157	0,9623	6	0,6884	0,9960	0,0021	DUO	+126
Glutamate	Uncl. Anaeroplasmataceae	Metabolite	Bacteria	GlutamateUncl. Anaeroplasmataceae	3	114	157	0,8805	6	0,2415	0,9869	0,0206	DUO	+126
Glutamate	Uncl. Anaeroplasmataceae	Metabolite	Bacteria	GlutamateUncl. Anaeroplasmataceae	3	114	157	0,7682	7	0,0359	0,9637	0,0437	DUO	24hC
3-Hydroxybutyrate	Uncl. Anaeroplasmataceae	Metabolite	Bacteria	3-HydroxybutyrateUncl. Anaeroplasmataceae	2	112	157	0,9968	6	0,9695	0,9997	<,0001	DUO	-42
3-Hydroxybutyrate	Uncl. Anaeroplasmataceae	Metabolite	Bacteria	3-HydroxybutyrateUncl. Anaeroplasmataceae	2	112	157	0,9178	6	0,4165	0,9911	0,0099	DUO	+126
Glucose	Uncl. Anaeroplasmataceae	Metabolite	Bacteria	GlucoseUncl. Anaeroplasmataceae	1	110	157	0,9971	6	0,9720	0,9997	<,0001	DUO	-42
Ornithine	Uncl. Anaeroplasmataceae	Metabolite	Bacteria	OrnithineUncl. Anaeroplasmataceae	2	110	157	0,9841	6	0,8573	0,9983	0,0004	DUO	-42
Ornithine	Uncl. Anaeroplasmataceae	Metabolite	Bacteria	OrnithineUncl. Anaeroplasmataceae	2	110	157	0,9528	6	0,6232	0,9950	0,0033	DUO	+126
Adipate	Uncl. Anaeroplasmataceae	Metabolite	Bacteria	AdipateUncl. Anaeroplasmataceae	2	109	157	0,9929	6	0,9336	0,9993	<,0001	DUO	-42
Isoleucine	Uncl. Anaeroplasmataceae	Metabolite	Bacteria	IsoleucineUncl. Anaeroplasmataceae	2	109	157	0,9997	6	0,9975	10000	<,0001	DUO	-42
Propionate	Uncl. Anaeroplasmataceae	Metabolite	Bacteria	PropionateUncl. Anaeroplasmataceae	2	109	157	0,9878	6	0,8884	0,9987	0,0002	DUO	-42
Propionate	Uncl. Anaeroplasmataceae	Metabolite	Bacteria	PropionateUncl. Anaeroplasmataceae	2	109	157	0,8508	7	0,2720	0,9775	0,0152	DUO	24hC
Adipate	Uncl. Anaeroplasmataceae	Metabolite	Bacteria	AdipateUncl. Anaeroplasmataceae	2	109	157	-0,8429	6	-0,9824	-0,0993	0,0351	DUO	-14
Isoleucine	Uncl. Anaeroplasmataceae	Metabolite	Bacteria	IsoleucineUncl. Anaeroplasmataceae	2	109	157	0,8973	5	0,0723	0,9933	0,0389	RUM	24hL
Isobutyrate	Uncl. Anaeroplasmataceae	Metabolite	Bacteria	IsobutyrateUncl. Anaeroplasmataceae	2	103	157	0,9918	6	0,9235	0,9991	0,0001	DUO	-42
Isobutyrate	Uncl. Anaeroplasmataceae	Metabolite	Bacteria	IsobutyrateUncl. Anaeroplasmataceae	2	103	157	0,8470	6	0,1134	0,9829	0,0333	RUM	72hC
3-Hydroxyphenylacetate	Uncl. Anaeroplasmataceae	Metabolite	Bacteria	3-HydroxyphenylacetateUncl. Anaeroplasmataceae	2	101	157	0,9976	6	0,9774	0,9998	<,0001	DUO	-42
3-Hydroxyphenylacetate	Uncl. Anaeroplasmataceae	Metabolite	Bacteria	3-HydroxyphenylacetateUncl. Anaeroplasmataceae	2	101	157	0,9468	6	0,5840	0,9943	0,0042	DUO	+126
Urea	Uncl. Anaeroplasmataceae	Metabolite	Bacteria	UreaUncl. Anaeroplasmataceae	2	65	157	0,9417	6	0,5518	0,9938	0,0050	RUM	72hC
Urea	Uncl. Anaeroplasmataceae	Metabolite	Bacteria	UreaUncl. Anaeroplasmataceae	2	65	157	0,9007	6	0,3311	0,9892	0,0143	RUM	24hC
Formate	Pseudobutyrivibrio	Metabolite	Bacteria	FormatePseudobutyrivibrio	3	178	141	0,9827	7	0,8830	0,9975	<,0001	DUO	12hL
Formate	Pseudobutyrivibrio	Metabolite	Bacteria	FormatePseudobutyrivibrio	3	178	141	0,9994	6	0,9945	0,9999	<,0001	DUO	+126
Formate	Pseudobutyrivibrio	Metabolite	Bacteria	FormatePseudobutyrivibrio	3	178	141	-0,9462	6	-0,9943	-0,5803	0,0043	RUM	+126
Formate	Uncl. Actinomycetaceae	Metabolite	Bacteria	FormateUncl. Actinomycetaceae	3	178	141	0,9997	6	0,9967	10000	<,0001	DUO	-42
Formate	Uncl. Actinomycetaceae	Metabolite	Bacteria	FormateUncl. Actinomycetaceae	3	178	141	0,9990	7	0,9927	0,9999	<,0001	DUO	12hL
Formate	Uncl. Actinomycetaceae	Metabolite	Bacteria	FormateUncl. Actinomycetaceae	3	178	141	0,9591	7	0,7420	0,9941	0,0006	RUM	-42
Choline	Uncl. Actinomycetaceae	Metabolite	Bacteria	CholineUncl. Actinomycetaceae	2	173	141	0,9998	6	0,9984	10000	<,0001	DUO	-42
Choline	Uncl. Actinomycetaceae	Metabolite	Bacteria	CholineUncl. Actinomycetaceae	2	173	141	0,9784	7	0,8563	0,9969	0,0001	DUO	12hL
Choline	Pseudobutyrivibrio	Metabolite	Bacteria	CholinePseudobutyrivibrio	3	173	141	0,9608	7	0,7512	0,9944	0,0006	DUO	12hL
Choline	Pseudobutyrivibrio	Metabolite	Bacteria	CholinePseudobutyrivibrio	3	173	141	0,9301	6	0,4837	0,9925	0,0072	RUM	+126
Choline	Pseudobutyrivibrio	Metabolite	Bacteria	CholinePseudobutyrivibrio	3	173	141	0,8869	6	0,2689	0,9876	0,0185	DUO	+126
Fumarate	Uncl. Actinomycetaceae	Metabolite	Bacteria	FumarateUncl. Actinomycetaceae	3	166	141	0,9845	7	0,8946	0,9978	<,0001	DUO	12hL
Fumarate	Pseudobutyrivibrio	Metabolite	Bacteria	FumaratePseudobutyrivibrio	4	166	141	10000	4	0,9996	10000	<,0001	DUO	72hL
Fumarate	Uncl. Actinomycetaceae	Metabolite	Bacteria	FumarateUncl. Actinomycetaceae	3	166	141	10000	4	0,9996	10000	<,0001	DUO	72hL
Fumarate	Pseudobutyrivibrio	Metabolite	Bacteria	FumaratePseudobutyrivibrio	4	166	141	0,9985	6	0,9853	0,9998	<,0001	DUO	+126
Fumarate	Uncl. Actinomycetaceae	Metabolite	Bacteria	FumarateUncl. Actinomycetaceae	3	166	141	0,9873	6	0,8845	0,9987	0,0002	DUO	-42
Fumarate	Pseudobutyrivibrio	Metabolite	Bacteria	FumaratePseudobutyrivibrio	4	166	141	0,9586	7	0,7390	0,9941	0,0007	DUO	12hL
Fumarate	Pseudobutyrivibrio	Metabolite	Bacteria	FumaratePseudobutyrivibrio	4	166	141	-0,9626	5	-0,9976	-0,5327	0,0086	DUO	12hC
Proline	Uncl. Actinomycetaceae	Metabolite	Bacteria	ProlineUncl. Actinomycetaceae	3	165	141	10000	6	0,9999	10000	<,0001	DUO	-42
Proline	Pseudobutyrivibrio	Metabolite	Bacteria	ProlinePseudobutyrivibrio	3	165	141	0,9830	7	0,8850	0,9976	<,0001	DUO	12hL
Proline	Uncl. Actinomycetaceae	Metabolite	Bacteria	ProlineUncl. Actinomycetaceae	3	165	141	0,9998	7	0,9985	10000	<,0001	DUO	12hL
Proline	Pseudobutyrivibrio	Metabolite	Bacteria	ProlinePseudobutyrivibrio	3	165	141	0,9999	6	0,9993	10000	<,0001	DUO	+126
Proline	Pseudobutyrivibrio	Metabolite	Bacteria	ProlinePseudobutyrivibrio	3	165	141	0,9623	6	0,6879	0,9960	0,0021	RUM	+126
Proline	Uncl. Actinomycetaceae	Metabolite	Bacteria	ProlineUncl. Actinomycetaceae	3	165	141	0,8039	7	0,1287	0,9698	0,0294	RUM	-42
Aspartate	Uncl. Actinomycetaceae	Metabolite	Bacteria	AspartateUncl. Actinomycetaceae	3	159	141	0,9996	6	0,9963	10000	<,0001	DUO	-42
Aspartate	Pseudobutyrivibrio	Metabolite	Bacteria	AspartatePseudobutyrivibrio	3	159	141	0,9851	7	0,8986	0,9979	<,0001	DUO	12hL
Aspartate	Uncl. Actinomycetaceae	Metabolite	Bacteria	AspartateUncl. Actinomycetaceae	3	159	141	0,9981	7	0,9863	0,9997	<,0001	DUO	12hL
Aspartate	Pseudobutyrivibrio	Metabolite	Bacteria	AspartatePseudobutyrivibrio	3	159	141	0,9451	6	0,5733	0,9941	0,0044	RUM	+126
Aspartate	Pseudobutyrivibrio	Metabolite	Bacteria	AspartatePseudobutyrivibrio	3	159	141	0,9275	6	0,4691	0,9922	0,0077	DUO	+126
Aspartate	Uncl. Actinomycetaceae	Metabolite	Bacteria	AspartateUncl. Actinomycetaceae	3	159	141	0,8742	7	0,3545	0,9813	0,0101	RUM	-42
Ribose	Uncl. Actinomycetaceae	Metabolite	Bacteria	RiboseUncl. Actinomycetaceae	2	158	141	0,9998	6	0,9979	10000	<,0001	DUO	-42
Ribose	Pseudobutyrivibrio	Metabolite	Bacteria	RibosePseudobutyrivibrio	3	158	141	0,9841	7	0,8926	0,9977	<,0001	DUO	12hL
Ribose	Uncl. Actinomycetaceae	Metabolite	Bacteria	RiboseUncl. Actinomycetaceae	2	158	141	0,9996	7	0,9968	0,9999	<,0001	DUO	12hL
Ribose	Pseudobutyrivibrio	Metabolite	Bacteria	RibosePseudobutyrivibrio	3	158	141	0,9887	6	0,8964	0,9988	0,0002	DUO	+126
Ribose	Pseudobutyrivibrio	Metabolite	Bacteria	RibosePseudobutyrivibrio	3	158	141	0,9874	5	0,8159	0,9992	0,0017	RUM	24hL
1,3-Dihydroxyacetone	Uncl. Actinomycetaceae	Metabolite	Bacteria	1,3-DihydroxyacetoneUncl. Actinomycetaceae	3	154	141	0,9999	6	0,9995	10000	<,0001	DUO	-42
Isopropanol	Uncl. Actinomycetaceae	Metabolite	Bacteria	IsopropanolUncl. Actinomycetaceae	2	154	141	0,9990	6	0,9906	0,9999	<,0001	DUO	-42
1,3-Dihydroxyacetone	Uncl. Actinomycetaceae	Metabolite	Bacteria	1,3-DihydroxyacetoneUncl. Actinomycetaceae	3	154	141	0,9888	7	0,9229	0,9984	<,0001	DUO	12hL
Isopropanol	Pseudobutyrivibrio	Metabolite	Bacteria	IsopropanolPseudobutyrivibrio	4	154	141	0,9902	7	0,9327	0,9986	<,0001	DUO	12hL
Isopropanol	Uncl. Actinomycetaceae	Metabolite	Bacteria	IsopropanolUncl. Actinomycetaceae	2	154	141	0,9954	7	0,9680	0,9994	<,0001	DUO	12hL
Isopropanol	Pseudobutyrivibrio	Metabolite	Bacteria	IsopropanolPseudobutyrivibrio	4	154	141	0,9925	6	0,9306	0,9992	<,0001	DUO	+126
1,3-Dihydroxyacetone	Pseudobutyrivibrio	Metabolite	Bacteria	1,3-DihydroxyacetonePseudobutyrivibrio	3	154	141	0,9738	7	0,8277	0,9963	0,0002	DUO	12hL
1,3-Dihydroxyacetone	Pseudobutyrivibrio	Metabolite	Bacteria	1,3-DihydroxyacetonePseudobutyrivibrio	3	154	141	0,9857	6	0,8704	0,9985	0,0003	DUO	+126
1,3-Dihydroxyacetone	Pseudobutyrivibrio	Metabolite	Bacteria	1,3-DihydroxyacetonePseudobutyrivibrio	3	154	141	0,9818	6	0,8374	0,9981	0,0005	RUM	+126
1,3-Dihydroxyacetone	Uncl. Actinomycetaceae	Metabolite	Bacteria	1,3-DihydroxyacetoneUncl. Actinomycetaceae	3	154	141	0,8727	7	0,3492	0,9810	0,0103	RUM	-42
Isopropanol	Pseudobutyrivibrio	Metabolite	Bacteria	IsopropanolPseudobutyrivibrio	4	154	141	0,8332	6	0,0667	0,9812	0,0394	RUM	+126
Isopropanol	Pseudobutyrivibrio	Metabolite	Bacteria	IsopropanolPseudobutyrivibrio	4	154	141	0,8865	5	0,0194	0,9925	0,0451	RUM	24hL
Lactate	Uncl. Actinomycetaceae	Metabolite	Bacteria	LactateUncl. Actinomycetaceae	2	153	141	0,9980	6	0,9807	0,9998	<,0001	DUO	-42
Lactate	Pseudobutyrivibrio	Metabolite	Bacteria	LactatePseudobutyrivibrio	4	153	141	0,9871	7	0,9117	0,9982	<,0001	DUO	12hL
Lactate	Uncl. Actinomycetaceae	Metabolite	Bacteria	LactateUncl. Actinomycetaceae	2	153	141	0,9882	7	0,9195	0,9983	<,0001	DUO	12hL
Lactate	Pseudobutyrivibrio	Metabolite	Bacteria	LactatePseudobutyrivibrio	4	153	141	0,9856	5	0,7928	0,9991	0,0021	RUM	24hL
Lactate	Pseudobutyrivibrio	Metabolite	Bacteria	LactatePseudobutyrivibrio	4	153	141	-0,9347	5	-0,9958	-0,2993	0,0198	DUO	12hC
Lactate	Pseudobutyrivibrio	Metabolite	Bacteria	LactatePseudobutyrivibrio	4	153	141	0,8565	6	0,1476	0,9841	0,0294	DUO	+126
Serine	Uncl. Actinomycetaceae	Metabolite	Bacteria	SerineUncl. Actinomycetaceae	2	152	141	10000	6	0,9998	10000	<,0001	DUO	-42
Serine	Pseudobutyrivibrio	Metabolite	Bacteria	SerinePseudobutyrivibrio	3	152	141	0,9818	7	0,8777	0,9974	<,0001	DUO	12hL
Serine	Uncl. Actinomycetaceae	Metabolite	Bacteria	SerineUncl. Actinomycetaceae	2	152	141	0,9992	7	0,9946	0,9999	<,0001	DUO	12hL
Serine	Pseudobutyrivibrio	Metabolite	Bacteria	SerinePseudobutyrivibrio	3	152	141	0,9910	6	0,9163	0,9991	0,0001	RUM	+126
Serine	Pseudobutyrivibrio	Metabolite	Bacteria	SerinePseudobutyrivibrio	3	152	141	0,9721	6	0,7604	0,9971	0,0012	DUO	+126
Cadaverine	Uncl. Actinomycetaceae	Metabolite	Bacteria	CadaverineUncl. Actinomycetaceae	2	143	141	0,9950	6	0,9533	0,9995	<,0001	DUO	-42
Uracil	Uncl. Actinomycetaceae	Metabolite	Bacteria	UracilUncl. Actinomycetaceae	4	143	141	0,9959	6	0,9608	0,9996	<,0001	DUO	-42
Cadaverine	Pseudobutyrivibrio	Metabolite	Bacteria	CadaverinePseudobutyrivibrio	5	143	141	0,9809	7	0,8716	0,9973	<,0001	DUO	12hL
Cadaverine	Uncl. Actinomycetaceae	Metabolite	Bacteria	CadaverineUncl. Actinomycetaceae	2	143	141	0,9806	7	0,8700	0,9972	<,0001	DUO	12hL
Uracil	Uncl. Actinomycetaceae	Metabolite	Bacteria	UracilUncl. Actinomycetaceae	4	143	141	0,9972	7	0,9800	0,9996	<,0001	DUO	12hL
Uracil	Pseudobutyrivibrio	Metabolite	Bacteria	UracilPseudobutyrivibrio	5	143	141	0,9984	6	0,9847	0,9998	<,0001	DUO	+126
Uracil	Pseudobutyrivibrio	Metabolite	Bacteria	UracilPseudobutyrivibrio	5	143	141	0,9790	7	0,8597	0,9970	0,0001	DUO	12hL
Uracil	Pseudobutyrivibrio	Metabolite	Bacteria	UracilPseudobutyrivibrio	5	143	141	0,9237	7	0,5608	0,9889	0,0030	DUO	24hC
Cadaverine	Pseudobutyrivibrio	Metabolite	Bacteria	CadaverinePseudobutyrivibrio	5	143	141	0,9814	5	0,7396	0,9988	0,0030	RUM	24hL
Cadaverine	Pseudobutyrivibrio	Metabolite	Bacteria	CadaverinePseudobutyrivibrio	5	143	141	0,9398	6	0,5403	0,9936	0,0053	DUO	+126
Uracil	Pseudobutyrivibrio	Metabolite	Bacteria	UracilPseudobutyrivibrio	5	143	141	-0,9667	5	-0,9979	-0,5741	0,0073	DUO	12hC
Uracil	Pseudobutyrivibrio	Metabolite	Bacteria	UracilPseudobutyrivibrio	5	143	141	0,9849	4	0,4452	0,9997	0,0151	DUO	72hL
Uracil	Uncl. Actinomycetaceae	Metabolite	Bacteria	UracilUncl. Actinomycetaceae	4	143	141	0,9849	4	0,4452	0,9997	0,0151	DUO	72hL
Cadaverine	Pseudobutyrivibrio	Metabolite	Bacteria	CadaverinePseudobutyrivibrio	5	143	141	-0,7953	7	-0,9684	-0,1052	0,0325	DUO	24hC
Cadaverine	Pseudobutyrivibrio	Metabolite	Bacteria	CadaverinePseudobutyrivibrio	5	143	141	0,9516	4	-0,1114	0,9990	0,0484	DUO	+118
Uracil	Uncl. Actinomycetaceae	Metabolite	Bacteria	UracilUncl. Actinomycetaceae	4	143	141	0,7550	7	0,0044	0,9614	0,0498	RUM	-42
Lysine	Uncl. Actinomycetaceae	Metabolite	Bacteria	LysineUncl. Actinomycetaceae	3	140	141	0,9979	6	0,9804	0,9998	<,0001	DUO	-42
Succinate	Uncl. Actinomycetaceae	Metabolite	Bacteria	SuccinateUncl. Actinomycetaceae	2	140	141	0,9997	6	0,9975	10000	<,0001	DUO	-42
Lysine	Pseudobutyrivibrio	Metabolite	Bacteria	LysinePseudobutyrivibrio	3	140	141	0,9944	7	0,9611	0,9992	<,0001	DUO	12hL
Succinate	Pseudobutyrivibrio	Metabolite	Bacteria	SuccinatePseudobutyrivibrio	2	140	141	0,9926	7	0,9488	0,9990	<,0001	DUO	12hL
Succinate	Uncl. Actinomycetaceae	Metabolite	Bacteria	SuccinateUncl. Actinomycetaceae	2	140	141	0,9955	7	0,9683	0,9994	<,0001	DUO	12hL
Succinate	Pseudobutyrivibrio	Metabolite	Bacteria	SuccinatePseudobutyrivibrio	2	140	141	0,9953	6	0,9557	0,9995	<,0001	DUO	+126
Lysine	Uncl. Actinomycetaceae	Metabolite	Bacteria	LysineUncl. Actinomycetaceae	3	140	141	0,9805	7	0,8694	0,9972	0,0001	DUO	12hL
Lysine	Pseudobutyrivibrio	Metabolite	Bacteria	LysinePseudobutyrivibrio	3	140	141	0,9684	5	0,5915	0,9980	0,0067	RUM	24hL
Allantoin	Uncl. Actinomycetaceae	Metabolite	Bacteria	AllantoinUncl. Actinomycetaceae	1	140	141	0,8907	7	0,4181	0,9838	0,0071	DUO	12hL
Lysine	Pseudobutyrivibrio	Metabolite	Bacteria	LysinePseudobutyrivibrio	3	140	141	0,9192	6	0,4238	0,9913	0,0095	DUO	+126
Allantoin	Pseudobutyrivibrio	Metabolite	Bacteria	AllantoinPseudobutyrivibrio	2	140	141	0,8561	7	0,2900	0,9784	0,0139	DUO	12hL
Lysine	Uncl. Actinomycetaceae	Metabolite	Bacteria	LysineUncl. Actinomycetaceae	3	140	141	0,8485	7	0,2643	0,9772	0,0158	RUM	-42
Allantoin	Pseudobutyrivibrio	Metabolite	Bacteria	AllantoinPseudobutyrivibrio	2	140	141	0,8062	7	0,1352	0,9702	0,0285	DUO	24hC
4-Hydroxybutyrate	Uncl. Actinomycetaceae	Metabolite	Bacteria	4-HydroxybutyrateUncl. Actinomycetaceae	3	139	141	0,9999	6	0,9995	10000	<,0001	DUO	-42
4-Hydroxybutyrate	Pseudobutyrivibrio	Metabolite	Bacteria	4-HydroxybutyratePseudobutyrivibrio	2	139	141	0,9858	7	0,9033	0,9980	<,0001	DUO	12hL
4-Hydroxybutyrate	Uncl. Actinomycetaceae	Metabolite	Bacteria	4-HydroxybutyrateUncl. Actinomycetaceae	3	139	141	0,9989	7	0,9923	0,9998	<,0001	DUO	12hL
4-Hydroxybutyrate	Uncl. Actinomycetaceae	Metabolite	Bacteria	4-HydroxybutyrateUncl. Actinomycetaceae	3	139	141	0,8872	7	0,4042	0,9833	0,0077	RUM	-42
Trimethylamine	Pseudobutyrivibrio	Metabolite	Bacteria	TrimethylaminePseudobutyrivibrio	1	139	141	0,9440	5	0,3691	0,9964	0,0158	RUM	24hL
Trimethylamine	Uncl. Actinomycetaceae	Metabolite	Bacteria	TrimethylamineUncl. Actinomycetaceae	1	139	141	-0,9794	4	-0,9996	-0,3119	0,0206	DUO	+118
4-Hydroxybutyrate	Pseudobutyrivibrio	Metabolite	Bacteria	4-HydroxybutyratePseudobutyrivibrio	2	139	141	0,8447	6	0,1054	0,9826	0,0343	DUO	+126
Pimelate	Uncl. Actinomycetaceae	Metabolite	Bacteria	PimelateUncl. Actinomycetaceae	3	137	141	0,9939	6	0,9432	0,9994	<,0001	DUO	-42
Pimelate	Pseudobutyrivibrio	Metabolite	Bacteria	PimelatePseudobutyrivibrio	3	137	141	0,9912	7	0,9393	0,9988	<,0001	DUO	12hL
Pimelate	Uncl. Actinomycetaceae	Metabolite	Bacteria	PimelateUncl. Actinomycetaceae	3	137	141	0,9534	7	0,7103	0,9933	0,0009	DUO	12hL
Pimelate	Pseudobutyrivibrio	Metabolite	Bacteria	PimelatePseudobutyrivibrio	3	137	141	0,9862	4	0,4823	0,9997	0,0138	DUO	72hL
Pimelate	Uncl. Actinomycetaceae	Metabolite	Bacteria	PimelateUncl. Actinomycetaceae	3	137	141	0,9862	4	0,4823	0,9997	0,0138	DUO	72hL
Pimelate	Pseudobutyrivibrio	Metabolite	Bacteria	PimelatePseudobutyrivibrio	3	137	141	-0,9032	5	-0,9937	-0,1030	0,0356	RUM	+14
N-nitrosodimethylamine	Uncl. Actinomycetaceae	Metabolite	Bacteria	N-nitrosodimethylamineUncl. Actinomycetaceae	2	136	141	0,9990	6	0,9906	0,9999	<,0001	DUO	-42
N-nitrosodimethylamine	Uncl. Actinomycetaceae	Metabolite	Bacteria	N-nitrosodimethylamineUncl. Actinomycetaceae	2	136	141	0,9909	7	0,9369	0,9987	<,0001	DUO	12hL
N-nitrosodimethylamine	Pseudobutyrivibrio	Metabolite	Bacteria	N-nitrosodimethylaminePseudobutyrivibrio	2	136	141	0,9782	7	0,8551	0,9969	0,0001	DUO	12hL
N-nitrosodimethylamine	Pseudobutyrivibrio	Metabolite	Bacteria	N-nitrosodimethylaminePseudobutyrivibrio	2	136	141	0,8946	6	0,3031	0,9885	0,0161	DUO	+126
Phenylacetate	Uncl. Actinomycetaceae	Metabolite	Bacteria	PhenylacetateUncl. Actinomycetaceae	2	134	141	0,9938	6	0,9416	0,9993	<,0001	DUO	-42
Phenylacetate	Pseudobutyrivibrio	Metabolite	Bacteria	PhenylacetatePseudobutyrivibrio	2	134	141	0,9863	7	0,9066	0,9981	<,0001	DUO	12hL
Phenylacetate	Uncl. Actinomycetaceae	Metabolite	Bacteria	PhenylacetateUncl. Actinomycetaceae	2	134	141	0,9918	7	0,9429	0,9988	<,0001	DUO	12hL
Phenylacetate	Pseudobutyrivibrio	Metabolite	Bacteria	PhenylacetatePseudobutyrivibrio	2	134	141	0,9336	6	0,5038	0,9929	0,0065	DUO	+126
Caffeine	Uncl. Actinomycetaceae	Metabolite	Bacteria	CaffeineUncl. Actinomycetaceae	4	133	141	10000	6	0,9999	10000	<,0001	DUO	-42
Hypoxanthine	Uncl. Actinomycetaceae	Metabolite	Bacteria	HypoxanthineUncl. Actinomycetaceae	3	133	141	0,9999	6	0,9995	10000	<,0001	DUO	-42
Valerate	Uncl. Actinomycetaceae	Metabolite	Bacteria	ValerateUncl. Actinomycetaceae	3	133	141	0,9930	6	0,9345	0,9993	<,0001	DUO	-42
Caffeine	Pseudobutyrivibrio	Metabolite	Bacteria	CaffeinePseudobutyrivibrio	3	133	141	0,9858	7	0,9031	0,9980	<,0001	DUO	12hL
Caffeine	Uncl. Actinomycetaceae	Metabolite	Bacteria	CaffeineUncl. Actinomycetaceae	4	133	141	0,9993	7	0,9949	0,9999	<,0001	DUO	12hL
Hypoxanthine	Pseudobutyrivibrio	Metabolite	Bacteria	HypoxanthinePseudobutyrivibrio	2	133	141	0,9856	7	0,9017	0,9980	<,0001	DUO	12hL
Hypoxanthine	Uncl. Actinomycetaceae	Metabolite	Bacteria	HypoxanthineUncl. Actinomycetaceae	3	133	141	0,9992	7	0,9940	0,9999	<,0001	DUO	12hL
Valerate	Pseudobutyrivibrio	Metabolite	Bacteria	ValeratePseudobutyrivibrio	1	133	141	0,9919	7	0,9441	0,9989	<,0001	DUO	12hL
Caffeine	Pseudobutyrivibrio	Metabolite	Bacteria	CaffeinePseudobutyrivibrio	3	133	141	0,9999	6	0,9988	10000	<,0001	DUO	+126
Hypoxanthine	Pseudobutyrivibrio	Metabolite	Bacteria	HypoxanthinePseudobutyrivibrio	2	133	141	0,9987	6	0,9877	0,9999	<,0001	DUO	+126
Valerate	Uncl. Actinomycetaceae	Metabolite	Bacteria	ValerateUncl. Actinomycetaceae	3	133	141	0,9687	7	0,7972	0,9955	0,0003	DUO	12hL
Caffeine	Uncl. Actinomycetaceae	Metabolite	Bacteria	CaffeineUncl. Actinomycetaceae	4	133	141	0,9545	6	0,6344	0,9952	0,0031	RUM	24hC
Hypoxanthine	Uncl. Actinomycetaceae	Metabolite	Bacteria	HypoxanthineUncl. Actinomycetaceae	3	133	141	0,8926	7	0,4256	0,9841	0,0068	RUM	-42
Caffeine	Uncl. Actinomycetaceae	Metabolite	Bacteria	CaffeineUncl. Actinomycetaceae	4	133	141	0,8645	7	0,3192	0,9797	0,0121	RUM	-42
Caffeine	Pseudobutyrivibrio	Metabolite	Bacteria	CaffeinePseudobutyrivibrio	3	133	141	-0,9025	5	-0,9936	-0,0995	0,0360	DUO	12hC
Valerate	Uncl. Actinomycetaceae	Metabolite	Bacteria	ValerateUncl. Actinomycetaceae	3	133	141	0,9574	4	-0,0461	0,9991	0,0426	DUO	+118
Acetone	Uncl. Actinomycetaceae	Metabolite	Bacteria	AcetoneUncl. Actinomycetaceae	2	132	141	0,9975	6	0,9764	0,9997	<,0001	DUO	-42
Acetone	Uncl. Actinomycetaceae	Metabolite	Bacteria	AcetoneUncl. Actinomycetaceae	2	132	141	0,9891	7	0,9250	0,9985	<,0001	DUO	12hL
Acetone	Pseudobutyrivibrio	Metabolite	Bacteria	AcetonePseudobutyrivibrio	2	132	141	0,9763	7	0,8431	0,9966	0,0002	DUO	12hL
Acetone	Pseudobutyrivibrio	Metabolite	Bacteria	AcetonePseudobutyrivibrio	2	132	141	0,9564	6	0,6474	0,9954	0,0028	DUO	+126
Benzoate	Uncl. Actinomycetaceae	Metabolite	Bacteria	BenzoateUncl. Actinomycetaceae	2	131	141	0,9996	6	0,9958	10000	<,0001	DUO	-42
Valine	Uncl. Actinomycetaceae	Metabolite	Bacteria	ValineUncl. Actinomycetaceae	3	131	141	0,9997	6	0,9972	10000	<,0001	DUO	-42
Benzoate	Uncl. Actinomycetaceae	Metabolite	Bacteria	BenzoateUncl. Actinomycetaceae	2	131	141	0,9994	7	0,9959	0,9999	<,0001	DUO	12hL
Valine	Pseudobutyrivibrio	Metabolite	Bacteria	ValinePseudobutyrivibrio	2	131	141	0,9943	7	0,9600	0,9992	<,0001	DUO	12hL
Valine	Uncl. Actinomycetaceae	Metabolite	Bacteria	ValineUncl. Actinomycetaceae	3	131	141	0,9928	7	0,9498	0,9990	<,0001	DUO	12hL
Benzoate	Pseudobutyrivibrio	Metabolite	Bacteria	BenzoatePseudobutyrivibrio	2	131	141	0,9973	6	0,9748	0,9997	<,0001	DUO	+126
Benzoate	Pseudobutyrivibrio	Metabolite	Bacteria	BenzoatePseudobutyrivibrio	2	131	141	0,9780	7	0,8538	0,9969	0,0001	DUO	12hL
Valine	Pseudobutyrivibrio	Metabolite	Bacteria	ValinePseudobutyrivibrio	2	131	141	0,9116	6	0,3847	0,9904	0,0114	DUO	+126
Valine	Uncl. Actinomycetaceae	Metabolite	Bacteria	ValineUncl. Actinomycetaceae	3	131	141	0,8311	7	0,2084	0,9743	0,0205	RUM	-42
Alanine	Uncl. Actinomycetaceae	Metabolite	Bacteria	AlanineUncl. Actinomycetaceae	2	130	141	0,9947	6	0,9497	0,9994	<,0001	DUO	-42
Carnitine	Uncl. Actinomycetaceae	Metabolite	Bacteria	CarnitineUncl. Actinomycetaceae	2	130	141	10000	6	0,9997	10000	<,0001	DUO	-42
Glycerol	Uncl. Actinomycetaceae	Metabolite	Bacteria	GlycerolUncl. Actinomycetaceae	2	130	141	10000	6	0,9999	10000	<,0001	DUO	-42
Imidazole	Uncl. Actinomycetaceae	Metabolite	Bacteria	ImidazoleUncl. Actinomycetaceae	4	130	141	0,9999	6	0,9992	10000	<,0001	DUO	-42
Leucine	Uncl. Actinomycetaceae	Metabolite	Bacteria	LeucineUncl. Actinomycetaceae	2	130	141	0,9949	6	0,9518	0,9995	<,0001	DUO	-42
Carnitine	Uncl. Actinomycetaceae	Metabolite	Bacteria	CarnitineUncl. Actinomycetaceae	2	130	141	0,9924	7	0,9475	0,9989	<,0001	DUO	12hL
Glycerol	Pseudobutyrivibrio	Metabolite	Bacteria	GlycerolPseudobutyrivibrio	3	130	141	0,9809	7	0,8721	0,9973	<,0001	DUO	12hL
Glycerol	Uncl. Actinomycetaceae	Metabolite	Bacteria	GlycerolUncl. Actinomycetaceae	2	130	141	0,9998	7	0,9985	10000	<,0001	DUO	12hL
Imidazole	Uncl. Actinomycetaceae	Metabolite	Bacteria	ImidazoleUncl. Actinomycetaceae	4	130	141	0,9997	7	0,9982	10000	<,0001	DUO	12hL
Imidazole	Pseudobutyrivibrio	Metabolite	Bacteria	ImidazolePseudobutyrivibrio	4	130	141	0,9999	6	0,9994	10000	<,0001	DUO	+126
Imidazole	Pseudobutyrivibrio	Metabolite	Bacteria	ImidazolePseudobutyrivibrio	4	130	141	0,9798	7	0,8647	0,9971	0,0001	DUO	12hL
Alanine	Pseudobutyrivibrio	Metabolite	Bacteria	AlaninePseudobutyrivibrio	2	130	141	0,9768	7	0,8465	0,9967	0,0002	DUO	12hL
Alanine	Pseudobutyrivibrio	Metabolite	Bacteria	AlaninePseudobutyrivibrio	2	130	141	0,9970	5	0,9528	0,9998	0,0002	RUM	24hL
Carnitine	Pseudobutyrivibrio	Metabolite	Bacteria	CarnitinePseudobutyrivibrio	1	130	141	0,9668	7	0,7862	0,9953	0,0004	DUO	12hL
Leucine	Pseudobutyrivibrio	Metabolite	Bacteria	LeucinePseudobutyrivibrio	2	130	141	0,9646	7	0,7733	0,9949	0,0004	DUO	12hL
Dimethylamine	Uncl. Actinomycetaceae	Metabolite	Bacteria	DimethylamineUncl. Actinomycetaceae	1	130	141	0,9627	7	0,7623	0,9947	0,0005	RUM	-42
Imidazole	Uncl. Actinomycetaceae	Metabolite	Bacteria	ImidazoleUncl. Actinomycetaceae	4	130	141	0,9617	7	0,7566	0,9945	0,0005	RUM	-42
Alanine	Uncl. Actinomycetaceae	Metabolite	Bacteria	AlanineUncl. Actinomycetaceae	2	130	141	0,9484	7	0,6835	0,9926	0,0011	DUO	12hL
Leucine	Uncl. Actinomycetaceae	Metabolite	Bacteria	LeucineUncl. Actinomycetaceae	2	130	141	0,9303	7	0,5917	0,9899	0,0024	DUO	12hL
Glycerol	Pseudobutyrivibrio	Metabolite	Bacteria	GlycerolPseudobutyrivibrio	3	130	141	0,9504	6	0,6073	0,9947	0,0036	DUO	+126
Dimethylamine	Pseudobutyrivibrio	Metabolite	Bacteria	DimethylaminePseudobutyrivibrio	2	130	141	-0,9704	5	-0,9981	-0,6124	0,0061	RUM	+14
Imidazole	Pseudobutyrivibrio	Metabolite	Bacteria	ImidazolePseudobutyrivibrio	4	130	141	-0,9659	5	-0,9978	-0,5657	0,0075	DUO	12hC
Glycerol	Pseudobutyrivibrio	Metabolite	Bacteria	GlycerolPseudobutyrivibrio	3	130	141	0,9189	6	0,4220	0,9912	0,0096	RUM	+126
Leucine	Pseudobutyrivibrio	Metabolite	Bacteria	LeucinePseudobutyrivibrio	2	130	141	0,9490	5	0,4101	0,9967	0,0137	RUM	24hL
Dimethylamine	Pseudobutyrivibrio	Metabolite	Bacteria	DimethylaminePseudobutyrivibrio	2	130	141	-0,8808	6	-0,9869	-0,2428	0,0205	DUO	-42
Imidazole	Pseudobutyrivibrio	Metabolite	Bacteria	ImidazolePseudobutyrivibrio	4	130	141	0,9703	4	0,1371	0,9994	0,0297	DUO	72hL
Imidazole	Uncl. Actinomycetaceae	Metabolite	Bacteria	ImidazoleUncl. Actinomycetaceae	4	130	141	0,9703	4	0,1371	0,9994	0,0297	DUO	72hL
Ethanol	Uncl. Actinomycetaceae	Metabolite	Bacteria	EthanolUncl. Actinomycetaceae	3	129	141	0,9998	6	0,9979	10000	<,0001	DUO	-42
Ethanol	Pseudobutyrivibrio	Metabolite	Bacteria	EthanolPseudobutyrivibrio	2	129	141	0,9825	7	0,8818	0,9975	<,0001	DUO	12hL
Ethanol	Uncl. Actinomycetaceae	Metabolite	Bacteria	EthanolUncl. Actinomycetaceae	3	129	141	0,9964	7	0,9750	0,9995	<,0001	DUO	12hL
Ethanol	Pseudobutyrivibrio	Metabolite	Bacteria	EthanolPseudobutyrivibrio	2	129	141	0,9773	6	0,8016	0,9976	0,0008	DUO	+126
Ethanol	Uncl. Actinomycetaceae	Metabolite	Bacteria	EthanolUncl. Actinomycetaceae	3	129	141	0,7696	7	0,0393	0,9640	0,0430	RUM	-42
2-Phenylpropionate	Uncl. Actinomycetaceae	Metabolite	Bacteria	2-PhenylpropionateUncl. Actinomycetaceae	2	127	141	0,9984	6	0,9843	0,9998	<,0001	DUO	-42
N-Phenylacetylglycine	Uncl. Actinomycetaceae	Metabolite	Bacteria	N-PhenylacetylglycineUncl. Actinomycetaceae	2	127	141	10000	6	0,9999	10000	<,0001	DUO	-42
2-Phenylpropionate	Pseudobutyrivibrio	Metabolite	Bacteria	2-PhenylpropionatePseudobutyrivibrio	3	127	141	0,9866	7	0,9087	0,9981	<,0001	DUO	12hL
2-Phenylpropionate	Uncl. Actinomycetaceae	Metabolite	Bacteria	2-PhenylpropionateUncl. Actinomycetaceae	2	127	141	0,9957	7	0,9698	0,9994	<,0001	DUO	12hL
N-Phenylacetylglycine	Pseudobutyrivibrio	Metabolite	Bacteria	N-PhenylacetylglycinePseudobutyrivibrio	4	127	141	0,9871	7	0,9118	0,9982	<,0001	DUO	12hL
N-Phenylacetylglycine	Uncl. Actinomycetaceae	Metabolite	Bacteria	N-PhenylacetylglycineUncl. Actinomycetaceae	2	127	141	0,9983	7	0,9883	0,9998	<,0001	DUO	12hL
2-Phenylpropionate	Pseudobutyrivibrio	Metabolite	Bacteria	2-PhenylpropionatePseudobutyrivibrio	3	127	141	0,9684	6	0,7324	0,9967	0,0015	DUO	+126
Glycine	Uncl. Actinomycetaceae	Metabolite	Bacteria	GlycineUncl. Actinomycetaceae	2	127	141	0,9982	4	0,9143	10000	0,0018	DUO	+118
2-Phenylpropionate	Pseudobutyrivibrio	Metabolite	Bacteria	2-PhenylpropionatePseudobutyrivibrio	3	127	141	-0,9804	5	-0,9988	-0,7266	0,0033	DUO	12hC
N-Phenylacetylglycine	Pseudobutyrivibrio	Metabolite	Bacteria	N-PhenylacetylglycinePseudobutyrivibrio	4	127	141	0,9389	6	0,5351	0,9935	0,0055	DUO	+126
Glycine	Pseudobutyrivibrio	Metabolite	Bacteria	GlycinePseudobutyrivibrio	1	127	141	0,8401	7	0,2370	0,9758	0,0180	DUO	24hC
N-Phenylacetylglycine	Pseudobutyrivibrio	Metabolite	Bacteria	N-PhenylacetylglycinePseudobutyrivibrio	4	127	141	-0,9113	5	-0,9942	-0,1481	0,0313	DUO	12hC
N-Phenylacetylglycine	Pseudobutyrivibrio	Metabolite	Bacteria	N-PhenylacetylglycinePseudobutyrivibrio	4	127	141	0,8275	6	0,0486	0,9806	0,0421	RUM	12hL
Glycine	Uncl. Actinomycetaceae	Metabolite	Bacteria	GlycineUncl. Actinomycetaceae	2	127	141	0,8255	6	0,0421	0,9803	0,0430	DUO	-42
Butyrate	Uncl. Actinomycetaceae	Metabolite	Bacteria	ButyrateUncl. Actinomycetaceae	3	126	141	0,9970	6	0,9713	0,9997	<,0001	DUO	-42
Phenylalanine	Uncl. Actinomycetaceae	Metabolite	Bacteria	PhenylalanineUncl. Actinomycetaceae	2	126	141	0,9990	6	0,9902	0,9999	<,0001	DUO	-42
Butyrate	Pseudobutyrivibrio	Metabolite	Bacteria	ButyratePseudobutyrivibrio	1	126	141	0,9902	7	0,9325	0,9986	<,0001	DUO	12hL
Phenylalanine	Uncl. Actinomycetaceae	Metabolite	Bacteria	PhenylalanineUncl. Actinomycetaceae	2	126	141	0,9996	7	0,9973	0,9999	<,0001	DUO	12hL
Phenylalanine	Pseudobutyrivibrio	Metabolite	Bacteria	PhenylalaninePseudobutyrivibrio	2	126	141	0,9803	7	0,8683	0,9972	0,0001	DUO	12hL
Butyrate	Uncl. Actinomycetaceae	Metabolite	Bacteria	ButyrateUncl. Actinomycetaceae	3	126	141	0,9675	7	0,7903	0,9954	0,0004	DUO	12hL
Phenylalanine	Pseudobutyrivibrio	Metabolite	Bacteria	PhenylalaninePseudobutyrivibrio	2	126	141	0,9328	6	0,4990	0,9928	0,0066	DUO	+126
Butyrate	Uncl. Actinomycetaceae	Metabolite	Bacteria	ButyrateUncl. Actinomycetaceae	3	126	141	0,9662	4	0,0710	0,9993	0,0338	DUO	+118
Ferulate	Uncl. Actinomycetaceae	Metabolite	Bacteria	FerulateUncl. Actinomycetaceae	2	124	141	0,9928	6	0,9327	0,9992	<,0001	DUO	-42
Maltose	Uncl. Actinomycetaceae	Metabolite	Bacteria	MaltoseUncl. Actinomycetaceae	3	124	141	0,9950	6	0,9531	0,9995	<,0001	DUO	-42
Ferulate	Pseudobutyrivibrio	Metabolite	Bacteria	FerulatePseudobutyrivibrio	3	124	141	0,9880	7	0,9181	0,9983	<,0001	DUO	12hL
Ferulate	Uncl. Actinomycetaceae	Metabolite	Bacteria	FerulateUncl. Actinomycetaceae	2	124	141	0,9960	7	0,9719	0,9994	<,0001	DUO	12hL
Maltose	Pseudobutyrivibrio	Metabolite	Bacteria	MaltosePseudobutyrivibrio	2	124	141	0,9822	7	0,8804	0,9975	<,0001	DUO	12hL
Maltose	Uncl. Actinomycetaceae	Metabolite	Bacteria	MaltoseUncl. Actinomycetaceae	3	124	141	0,9997	7	0,9981	10000	<,0001	DUO	12hL
Ferulate	Pseudobutyrivibrio	Metabolite	Bacteria	FerulatePseudobutyrivibrio	3	124	141	0,9727	6	0,7654	0,9971	0,0011	DUO	+126
Ferulate	Pseudobutyrivibrio	Metabolite	Bacteria	FerulatePseudobutyrivibrio	3	124	141	-0,9676	5	-0,9979	-0,5827	0,0070	DUO	12hC
Maltose	Uncl. Actinomycetaceae	Metabolite	Bacteria	MaltoseUncl. Actinomycetaceae	3	124	141	0,8414	7	0,2413	0,9760	0,0176	RUM	-42
Maltose	Pseudobutyrivibrio	Metabolite	Bacteria	MaltosePseudobutyrivibrio	2	124	141	-0,9395	5	-0,9961	-0,3342	0,0177	DUO	12hC
Nicotinate	Uncl. Actinomycetaceae	Metabolite	Bacteria	NicotinateUncl. Actinomycetaceae	3	123	141	10000	6	10000	10000	<,0001	DUO	-42
Nicotinate	Pseudobutyrivibrio	Metabolite	Bacteria	NicotinatePseudobutyrivibrio	2	123	141	0,9815	7	0,8756	0,9974	<,0001	DUO	12hL
Nicotinate	Uncl. Actinomycetaceae	Metabolite	Bacteria	NicotinateUncl. Actinomycetaceae	3	123	141	0,9999	7	0,9995	10000	<,0001	DUO	12hL
Nicotinate	Pseudobutyrivibrio	Metabolite	Bacteria	NicotinatePseudobutyrivibrio	2	123	141	0,9999	6	0,9995	10000	<,0001	DUO	+126
Nicotinate	Uncl. Actinomycetaceae	Metabolite	Bacteria	NicotinateUncl. Actinomycetaceae	3	123	141	0,9403	7	0,6414	0,9914	0,0016	RUM	-42
3-Phenylpropionate	Uncl. Actinomycetaceae	Metabolite	Bacteria	3-PhenylpropionateUncl. Actinomycetaceae	2	121	141	0,9996	6	0,9957	10000	<,0001	DUO	-42
3-Phenylpropionate	Pseudobutyrivibrio	Metabolite	Bacteria	3-PhenylpropionatePseudobutyrivibrio	3	121	141	0,9842	7	0,8927	0,9978	<,0001	DUO	12hL
3-Phenylpropionate	Uncl. Actinomycetaceae	Metabolite	Bacteria	3-PhenylpropionateUncl. Actinomycetaceae	2	121	141	0,9990	7	0,9927	0,9999	<,0001	DUO	12hL
3-Phenylpropionate	Pseudobutyrivibrio	Metabolite	Bacteria	3-PhenylpropionatePseudobutyrivibrio	3	121	141	0,9960	6	0,9626	0,9996	<,0001	DUO	+126
3-Phenylpropionate	Pseudobutyrivibrio	Metabolite	Bacteria	3-PhenylpropionatePseudobutyrivibrio	3	121	141	-0,9109	6	-0,9904	-0,3812	0,0115	RUM	+126
Methylamine	Uncl. Actinomycetaceae	Metabolite	Bacteria	MethylamineUncl. Actinomycetaceae	3	120	141	0,9972	6	0,9738	0,9997	<,0001	DUO	-42
Methylamine	Uncl. Actinomycetaceae	Metabolite	Bacteria	MethylamineUncl. Actinomycetaceae	3	120	141	0,9764	7	0,8439	0,9966	0,0002	RUM	-42
Methylamine	Pseudobutyrivibrio	Metabolite	Bacteria	MethylaminePseudobutyrivibrio	3	120	141	0,9719	7	0,8160	0,9960	0,0003	DUO	12hL
Methylamine	Uncl. Actinomycetaceae	Metabolite	Bacteria	MethylamineUncl. Actinomycetaceae	3	120	141	0,9538	7	0,7127	0,9934	0,0009	DUO	12hL
Methylamine	Pseudobutyrivibrio	Metabolite	Bacteria	MethylaminePseudobutyrivibrio	3	120	141	0,9795	5	0,7163	0,9987	0,0035	RUM	24hL
Methylamine	Pseudobutyrivibrio	Metabolite	Bacteria	MethylaminePseudobutyrivibrio	3	120	141	0,8877	6	0,2723	0,9877	0,0182	DUO	+126
Isovalerate	Uncl. Actinomycetaceae	Metabolite	Bacteria	IsovalerateUncl. Actinomycetaceae	2	119	141	0,9845	6	0,8600	0,9984	0,0004	DUO	-42
Isovalerate	Pseudobutyrivibrio	Metabolite	Bacteria	IsovaleratePseudobutyrivibrio	2	119	141	0,9341	7	0,6102	0,9904	0,0021	DUO	12hL
Isovalerate	Uncl. Actinomycetaceae	Metabolite	Bacteria	IsovalerateUncl. Actinomycetaceae	2	119	141	0,8697	7	0,3382	0,9806	0,0110	DUO	12hL
Isovalerate	Pseudobutyrivibrio	Metabolite	Bacteria	IsovaleratePseudobutyrivibrio	2	119	141	-0,8131	7	-0,9714	-0,1549	0,0262	DUO	24hC
Methanol	Uncl. Actinomycetaceae	Metabolite	Bacteria	MethanolUncl. Actinomycetaceae	3	118	141	10000	6	0,9998	10000	<,0001	DUO	-42
Methanol	Pseudobutyrivibrio	Metabolite	Bacteria	MethanolPseudobutyrivibrio	2	118	141	0,9839	7	0,8910	0,9977	<,0001	DUO	12hL
Methanol	Uncl. Actinomycetaceae	Metabolite	Bacteria	MethanolUncl. Actinomycetaceae	3	118	141	0,9983	7	0,9880	0,9998	<,0001	DUO	12hL
Methanol	Pseudobutyrivibrio	Metabolite	Bacteria	MethanolPseudobutyrivibrio	2	118	141	0,9991	6	0,9916	0,9999	<,0001	DUO	+126
Methanol	Uncl. Actinomycetaceae	Metabolite	Bacteria	MethanolUncl. Actinomycetaceae	3	118	141	0,8701	7	0,3395	0,9806	0,0109	RUM	-42
Histidine	Uncl. Actinomycetaceae	Metabolite	Bacteria	HistidineUncl. Actinomycetaceae	3	116	141	0,9999	6	0,9994	10000	<,0001	DUO	-42
Tyrosine	Uncl. Actinomycetaceae	Metabolite	Bacteria	TyrosineUncl. Actinomycetaceae	2	116	141	0,9994	6	0,9941	0,9999	<,0001	DUO	-42
Histidine	Pseudobutyrivibrio	Metabolite	Bacteria	HistidinePseudobutyrivibrio	2	116	141	0,9812	7	0,8738	0,9973	<,0001	DUO	12hL
Histidine	Uncl. Actinomycetaceae	Metabolite	Bacteria	HistidineUncl. Actinomycetaceae	3	116	141	0,9999	7	0,9995	10000	<,0001	DUO	12hL
Tyrosine	Pseudobutyrivibrio	Metabolite	Bacteria	TyrosinePseudobutyrivibrio	2	116	141	0,9831	7	0,8856	0,9976	<,0001	DUO	12hL
Tyrosine	Uncl. Actinomycetaceae	Metabolite	Bacteria	TyrosineUncl. Actinomycetaceae	2	116	141	0,9997	7	0,9981	10000	<,0001	DUO	12hL
Histidine	Pseudobutyrivibrio	Metabolite	Bacteria	HistidinePseudobutyrivibrio	2	116	141	0,9998	6	0,9977	10000	<,0001	DUO	+126
Tyrosine	Pseudobutyrivibrio	Metabolite	Bacteria	TyrosinePseudobutyrivibrio	2	116	141	0,9343	6	0,5077	0,9930	0,0063	DUO	+126
Histidine	Uncl. Actinomycetaceae	Metabolite	Bacteria	HistidineUncl. Actinomycetaceae	3	116	141	0,8049	7	0,1316	0,9700	0,0290	RUM	-42
Acetoacetate	Uncl. Actinomycetaceae	Metabolite	Bacteria	AcetoacetateUncl. Actinomycetaceae	2	115	141	0,9982	6	0,9824	0,9998	<,0001	DUO	-42
Acetoacetate	Pseudobutyrivibrio	Metabolite	Bacteria	AcetoacetatePseudobutyrivibrio	1	115	141	0,9934	7	0,9540	0,9991	<,0001	DUO	12hL
Acetoacetate	Uncl. Actinomycetaceae	Metabolite	Bacteria	AcetoacetateUncl. Actinomycetaceae	2	115	141	0,9793	7	0,8615	0,9971	0,0001	DUO	12hL
Glutamate	Uncl. Actinomycetaceae	Metabolite	Bacteria	GlutamateUncl. Actinomycetaceae	2	114	141	0,9987	6	0,9880	0,9999	<,0001	DUO	-42
Xanthine	Uncl. Actinomycetaceae	Metabolite	Bacteria	XanthineUncl. Actinomycetaceae	3	114	141	0,9988	6	0,9888	0,9999	<,0001	DUO	-42
Glutamate	Uncl. Actinomycetaceae	Metabolite	Bacteria	GlutamateUncl. Actinomycetaceae	2	114	141	0,9845	7	0,8950	0,9978	<,0001	DUO	12hL
Xanthine	Uncl. Actinomycetaceae	Metabolite	Bacteria	XanthineUncl. Actinomycetaceae	3	114	141	0,9997	7	0,9980	10000	<,0001	DUO	12hL
Xanthine	Pseudobutyrivibrio	Metabolite	Bacteria	XanthinePseudobutyrivibrio	2	114	141	0,9951	6	0,9534	0,9995	<,0001	DUO	+126
Xanthine	Pseudobutyrivibrio	Metabolite	Bacteria	XanthinePseudobutyrivibrio	2	114	141	0,9784	7	0,8564	0,9969	0,0001	DUO	12hL
Glutamate	Pseudobutyrivibrio	Metabolite	Bacteria	GlutamatePseudobutyrivibrio	2	114	141	0,9667	7	0,7854	0,9952	0,0004	DUO	12hL
Glutamate	Pseudobutyrivibrio	Metabolite	Bacteria	GlutamatePseudobutyrivibrio	2	114	141	0,9355	6	0,5149	0,9931	0,0061	DUO	+126
Xanthine	Uncl. Actinomycetaceae	Metabolite	Bacteria	XanthineUncl. Actinomycetaceae	3	114	141	0,8279	7	0,1988	0,9738	0,0215	RUM	-42
3-Hydroxybutyrate	Uncl. Actinomycetaceae	Metabolite	Bacteria	3-HydroxybutyrateUncl. Actinomycetaceae	2	112	141	0,9968	6	0,9695	0,9997	<,0001	DUO	-42
3-Hydroxybutyrate	Uncl. Actinomycetaceae	Metabolite	Bacteria	3-HydroxybutyrateUncl. Actinomycetaceae	2	112	141	0,9870	7	0,9115	0,9982	<,0001	DUO	12hL
Acetate	Uncl. Actinomycetaceae	Metabolite	Bacteria	AcetateUncl. Actinomycetaceae	1	112	141	0,9998	4	0,9877	10000	0,0002	DUO	+118
3-Hydroxybutyrate	Pseudobutyrivibrio	Metabolite	Bacteria	3-HydroxybutyratePseudobutyrivibrio	2	112	141	0,9665	7	0,7844	0,9952	0,0004	DUO	12hL
3-Hydroxybutyrate	Pseudobutyrivibrio	Metabolite	Bacteria	3-HydroxybutyratePseudobutyrivibrio	2	112	141	0,9475	6	0,5884	0,9944	0,0041	DUO	+126
Acetate	Pseudobutyrivibrio	Metabolite	Bacteria	AcetatePseudobutyrivibrio	1	112	141	-0,9450	5	-0,9965	-0,3773	0,0154	DUO	72hC
Glucose	Uncl. Actinomycetaceae	Metabolite	Bacteria	GlucoseUncl. Actinomycetaceae	2	110	141	0,9971	6	0,9720	0,9997	<,0001	DUO	-42
Glucose	Pseudobutyrivibrio	Metabolite	Bacteria	GlucosePseudobutyrivibrio	3	110	141	0,9821	7	0,8792	0,9975	<,0001	DUO	12hL
Glucose	Uncl. Actinomycetaceae	Metabolite	Bacteria	GlucoseUncl. Actinomycetaceae	2	110	141	0,9997	7	0,9977	10000	<,0001	DUO	12hL
Ornithine	Uncl. Actinomycetaceae	Metabolite	Bacteria	OrnithineUncl. Actinomycetaceae	3	110	141	0,9841	6	0,8573	0,9983	0,0004	DUO	-42
Glucose	Pseudobutyrivibrio	Metabolite	Bacteria	GlucosePseudobutyrivibrio	3	110	141	-0,9923	5	-0,9995	-0,8831	0,0008	DUO	12hC
Ornithine	Uncl. Actinomycetaceae	Metabolite	Bacteria	OrnithineUncl. Actinomycetaceae	3	110	141	0,9433	7	0,6568	0,9918	0,0014	DUO	12hL
Ornithine	Pseudobutyrivibrio	Metabolite	Bacteria	OrnithinePseudobutyrivibrio	2	110	141	0,9184	7	0,5364	0,9881	0,0035	DUO	12hL
Ornithine	Pseudobutyrivibrio	Metabolite	Bacteria	OrnithinePseudobutyrivibrio	2	110	141	0,9465	6	0,5823	0,9943	0,0042	DUO	+126
Glucose	Pseudobutyrivibrio	Metabolite	Bacteria	GlucosePseudobutyrivibrio	3	110	141	0,8575	6	0,1511	0,9842	0,0290	DUO	+126
Ornithine	Uncl. Actinomycetaceae	Metabolite	Bacteria	OrnithineUncl. Actinomycetaceae	3	110	141	0,8018	7	0,1230	0,9695	0,0301	RUM	-42
Adipate	Uncl. Actinomycetaceae	Metabolite	Bacteria	AdipateUncl. Actinomycetaceae	2	109	141	0,9929	6	0,9336	0,9993	<,0001	DUO	-42
Isoleucine	Uncl. Actinomycetaceae	Metabolite	Bacteria	IsoleucineUncl. Actinomycetaceae	2	109	141	0,9997	6	0,9975	10000	<,0001	DUO	-42
Adipate	Pseudobutyrivibrio	Metabolite	Bacteria	AdipatePseudobutyrivibrio	1	109	141	0,9906	7	0,9353	0,9987	<,0001	DUO	12hL
Adipate	Uncl. Actinomycetaceae	Metabolite	Bacteria	AdipateUncl. Actinomycetaceae	2	109	141	0,9894	7	0,9270	0,9985	<,0001	DUO	12hL
Propionate	Uncl. Actinomycetaceae	Metabolite	Bacteria	PropionateUncl. Actinomycetaceae	2	109	141	0,9878	6	0,8884	0,9987	0,0002	DUO	-42
Propionate	Pseudobutyrivibrio	Metabolite	Bacteria	PropionatePseudobutyrivibrio	2	109	141	-0,9954	5	-0,9997	-0,9293	0,0004	RUM	+14
Isoleucine	Uncl. Actinomycetaceae	Metabolite	Bacteria	IsoleucineUncl. Actinomycetaceae	2	109	141	0,9676	7	0,7909	0,9954	0,0004	DUO	12hL
Isoleucine	Pseudobutyrivibrio	Metabolite	Bacteria	IsoleucinePseudobutyrivibrio	1	109	141	0,9508	7	0,6962	0,9929	0,0010	DUO	12hL
Propionate	Pseudobutyrivibrio	Metabolite	Bacteria	PropionatePseudobutyrivibrio	2	109	141	0,7878	7	0,0854	0,9671	0,0354	DUO	12hL
Propionate	Uncl. Actinomycetaceae	Metabolite	Bacteria	PropionateUncl. Actinomycetaceae	2	109	141	0,9586	4	-0,0317	0,9992	0,0414	DUO	+118
Isobutyrate	Uncl. Actinomycetaceae	Metabolite	Bacteria	IsobutyrateUncl. Actinomycetaceae	3	103	141	0,9918	6	0,9235	0,9991	0,0001	DUO	-42
Isobutyrate	Pseudobutyrivibrio	Metabolite	Bacteria	IsobutyratePseudobutyrivibrio	2	103	141	0,8946	7	0,4339	0,9845	0,0065	DUO	12hL
Isobutyrate	Uncl. Actinomycetaceae	Metabolite	Bacteria	IsobutyrateUncl. Actinomycetaceae	3	103	141	0,7864	7	0,0817	0,9669	0,0360	DUO	12hL
Isobutyrate	Pseudobutyrivibrio	Metabolite	Bacteria	IsobutyratePseudobutyrivibrio	2	103	141	0,9618	4	0,0092	0,9992	0,0382	DUO	72hL
Isobutyrate	Uncl. Actinomycetaceae	Metabolite	Bacteria	IsobutyrateUncl. Actinomycetaceae	3	103	141	0,9618	4	0,0092	0,9992	0,0382	DUO	72hL
3-Hydroxyphenylacetate	Uncl. Actinomycetaceae	Metabolite	Bacteria	3-HydroxyphenylacetateUncl. Actinomycetaceae	2	101	141	0,9976	6	0,9774	0,9998	<,0001	DUO	-42
3-Hydroxyphenylacetate	Pseudobutyrivibrio	Metabolite	Bacteria	3-HydroxyphenylacetatePseudobutyrivibrio	2	101	141	0,9848	7	0,8966	0,9978	<,0001	DUO	12hL
3-Hydroxyphenylacetate	Uncl. Actinomycetaceae	Metabolite	Bacteria	3-HydroxyphenylacetateUncl. Actinomycetaceae	2	101	141	0,9991	7	0,9938	0,9999	<,0001	DUO	12hL
3-Hydroxyphenylacetate	Pseudobutyrivibrio	Metabolite	Bacteria	3-HydroxyphenylacetatePseudobutyrivibrio	2	101	141	0,9829	6	0,8473	0,9982	0,0004	DUO	+126
Formate	Olsenella	Metabolite	Bacteria	FormateOlsenella	2	178	139	0,9588	7	0,7404	0,9941	0,0006	DUO	+100
Formate	Olsenella	Metabolite	Bacteria	FormateOlsenella	2	178	139	0,9371	6	0,5241	0,9933	0,0058	RUM	+118
Choline	Olsenella	Metabolite	Bacteria	CholineOlsenella	2	173	139	0,8247	7	0,1890	0,9733	0,0224	DUO	+100
Choline	Olsenella	Metabolite	Bacteria	CholineOlsenella	2	173	139	0,9067	5	0,1222	0,9939	0,0337	DUO	12hC
Fumarate	Olsenella	Metabolite	Bacteria	FumarateOlsenella	3	166	139	0,9177	6	0,4159	0,9911	0,0099	RUM	-14
Fumarate	Olsenella	Metabolite	Bacteria	FumarateOlsenella	3	166	139	0,9316	5	0,2772	0,9956	0,0212	DUO	72hC
Fumarate	Olsenella	Metabolite	Bacteria	FumarateOlsenella	3	166	139	0,7834	7	0,0740	0,9664	0,0372	DUO	+100
Proline	Olsenella	Metabolite	Bacteria	ProlineOlsenella	2	165	139	0,9756	5	0,6702	0,9985	0,0046	DUO	72hC
Proline	Olsenella	Metabolite	Bacteria	ProlineOlsenella	2	165	139	0,8612	6	0,1648	0,9846	0,0276	RUM	+126
Aspartate	Olsenella	Metabolite	Bacteria	AspartateOlsenella	3	159	139	0,9799	5	0,7206	0,9987	0,0034	DUO	+14
Aspartate	Olsenella	Metabolite	Bacteria	AspartateOlsenella	3	159	139	0,8494	6	0,1217	0,9832	0,0323	RUM	+126
Aspartate	Olsenella	Metabolite	Bacteria	AspartateOlsenella	3	159	139	0,9049	5	0,1123	0,9938	0,0347	DUO	24hL
Ribose	Olsenella	Metabolite	Bacteria	RiboseOlsenella	1	158	139	0,9799	5	0,7205	0,9987	0,0034	DUO	+14
1,3-Dihydroxyacetone	Olsenella	Metabolite	Bacteria	1,3-DihydroxyacetoneOlsenella	1	154	139	0,9864	5	0,8023	0,9991	0,0019	DUO	72hC
Isopropanol	Olsenella	Metabolite	Bacteria	IsopropanolOlsenella	4	154	139	0,9264	7	0,5732	0,9893	0,0027	DUO	+100
Isopropanol	Olsenella	Metabolite	Bacteria	IsopropanolOlsenella	4	154	139	0,8460	6	0,1100	0,9828	0,0337	DUO	-14
Isopropanol	Olsenella	Metabolite	Bacteria	IsopropanolOlsenella	4	154	139	-0,8979	5	-0,9933	-0,0755	0,0385	RUM	24hL
Isopropanol	Olsenella	Metabolite	Bacteria	IsopropanolOlsenella	4	154	139	0,8910	5	0,0409	0,9928	0,0425	RUM	+14
Lactate	Olsenella	Metabolite	Bacteria	LactateOlsenella	5	153	139	0,9904	5	0,8565	0,9994	0,0011	RUM	+100
Lactate	Olsenella	Metabolite	Bacteria	LactateOlsenella	5	153	139	0,9608	6	0,6778	0,9959	0,0023	RUM	+118
Lactate	Olsenella	Metabolite	Bacteria	LactateOlsenella	5	153	139	0,8392	7	0,2341	0,9757	0,0182	DUO	+100
Lactate	Olsenella	Metabolite	Bacteria	LactateOlsenella	5	153	139	0,8726	6	0,2092	0,9859	0,0233	DUO	-14
Lactate	Olsenella	Metabolite	Bacteria	LactateOlsenella	5	153	139	0,8538	6	0,1376	0,9837	0,0305	RUM	-14
Serine	Olsenella	Metabolite	Bacteria	SerineOlsenella	2	152	139	0,9817	5	0,7424	0,9988	0,0030	DUO	+14
Serine	Olsenella	Metabolite	Bacteria	SerineOlsenella	2	152	139	0,8262	6	0,0444	0,9804	0,0427	DUO	-14
Cadaverine	Olsenella	Metabolite	Bacteria	CadaverineOlsenella	3	143	139	0,9887	5	0,8329	0,9993	0,0014	RUM	+100
Cadaverine	Olsenella	Metabolite	Bacteria	CadaverineOlsenella	3	143	139	0,9238	7	0,5612	0,9889	0,0030	DUO	+100
Uracil	Olsenella	Metabolite	Bacteria	UracilOlsenella	3	143	139	0,9081	7	0,4906	0,9865	0,0047	DUO	+100
Cadaverine	Olsenella	Metabolite	Bacteria	CadaverineOlsenella	3	143	139	0,9362	5	0,3100	0,9959	0,0192	DUO	12hC
Uracil	Olsenella	Metabolite	Bacteria	UracilOlsenella	3	143	139	0,9073	5	0,1255	0,9939	0,0334	RUM	+14
Uracil	Olsenella	Metabolite	Bacteria	UracilOlsenella	3	143	139	0,8384	6	0,0841	0,9819	0,0370	RUM	-14
Succinate	Olsenella	Metabolite	Bacteria	SuccinateOlsenella	3	140	139	-0,9824	6	-0,9982	-0,8425	0,0005	RUM	72hC
Allantoin	Olsenella	Metabolite	Bacteria	AllantoinOlsenella	4	140	139	-0,9991	4	-10000	-0,9556	0,0009	DUO	72hL
Allantoin	Olsenella	Metabolite	Bacteria	AllantoinOlsenella	4	140	139	0,9721	5	0,6313	0,9982	0,0056	DUO	72hC
Lysine	Olsenella	Metabolite	Bacteria	LysineOlsenella	3	140	139	0,9560	5	0,4710	0,9972	0,0110	RUM	+100
Lysine	Olsenella	Metabolite	Bacteria	LysineOlsenella	3	140	139	0,9292	5	0,2606	0,9954	0,0224	DUO	24hL
Allantoin	Olsenella	Metabolite	Bacteria	AllantoinOlsenella	4	140	139	0,8560	6	0,1456	0,9840	0,0296	RUM	-14
Succinate	Olsenella	Metabolite	Bacteria	SuccinateOlsenella	3	140	139	0,7988	7	0,1147	0,9690	0,0312	DUO	+100
Allantoin	Olsenella	Metabolite	Bacteria	AllantoinOlsenella	4	140	139	0,8513	6	0,1284	0,9834	0,0315	RUM	72hL
Lysine	Olsenella	Metabolite	Bacteria	LysineOlsenella	3	140	139	0,9016	5	0,0947	0,9936	0,0365	DUO	12hC
Succinate	Olsenella	Metabolite	Bacteria	SuccinateOlsenella	3	140	139	0,8952	5	0,0614	0,9931	0,0401	DUO	+14
Trimethylamine	Olsenella	Metabolite	Bacteria	TrimethylamineOlsenella	3	139	139	0,9615	7	0,7554	0,9945	0,0005	DUO	+100
Trimethylamine	Olsenella	Metabolite	Bacteria	TrimethylamineOlsenella	3	139	139	-0,9003	7	-0,9853	-0,4573	0,0057	DUO	12hL
4-Hydroxybutyrate	Olsenella	Metabolite	Bacteria	4-HydroxybutyrateOlsenella	3	139	139	0,9262	5	0,2403	0,9952	0,0238	DUO	+14
Trimethylamine	Olsenella	Metabolite	Bacteria	TrimethylamineOlsenella	3	139	139	0,8671	6	0,1874	0,9853	0,0253	DUO	-14
4-Hydroxybutyrate	Olsenella	Metabolite	Bacteria	4-HydroxybutyrateOlsenella	3	139	139	0,8554	6	0,1433	0,9839	0,0299	DUO	-14
4-Hydroxybutyrate	Olsenella	Metabolite	Bacteria	4-HydroxybutyrateOlsenella	3	139	139	0,7808	7	0,0675	0,9659	0,0382	DUO	+100
Pimelate	Olsenella	Metabolite	Bacteria	PimelateOlsenella	3	137	139	0,9859	5	0,7960	0,9991	0,0020	DUO	+14
Pimelate	Olsenella	Metabolite	Bacteria	PimelateOlsenella	3	137	139	0,8564	6	0,1469	0,9840	0,0295	RUM	+118
Pimelate	Olsenella	Metabolite	Bacteria	PimelateOlsenella	3	137	139	0,8929	5	0,0500	0,9929	0,0414	RUM	+14
N-nitrosodimethylamine	Olsenella	Metabolite	Bacteria	N-nitrosodimethylamineOlsenella	1	136	139	0,9331	5	0,2874	0,9957	0,0206	DUO	24hL
Phenylacetate	Olsenella	Metabolite	Bacteria	PhenylacetateOlsenella	2	134	139	0,9105	7	0,5009	0,9869	0,0044	DUO	+100
Phenylacetate	Olsenella	Metabolite	Bacteria	PhenylacetateOlsenella	2	134	139	0,8942	5	0,0565	0,9930	0,0406	DUO	72hC
Hypoxanthine	Olsenella	Metabolite	Bacteria	HypoxanthineOlsenella	3	133	139	0,9587	7	0,7396	0,9941	0,0007	DUO	+100
Valerate	Olsenella	Metabolite	Bacteria	ValerateOlsenella	3	133	139	0,9902	5	0,8538	0,9994	0,0012	DUO	+14
Valerate	Olsenella	Metabolite	Bacteria	ValerateOlsenella	3	133	139	0,9513	5	0,4295	0,9969	0,0128	RUM	+14
Caffeine	Olsenella	Metabolite	Bacteria	CaffeineOlsenella	1	133	139	0,8375	7	0,2288	0,9754	0,0187	DUO	+100
Valerate	Olsenella	Metabolite	Bacteria	ValerateOlsenella	3	133	139	0,9279	5	0,2518	0,9953	0,0230	DUO	24hL
Hypoxanthine	Olsenella	Metabolite	Bacteria	HypoxanthineOlsenella	3	133	139	0,8987	5	0,0793	0,9933	0,0381	DUO	72hC
Hypoxanthine	Olsenella	Metabolite	Bacteria	HypoxanthineOlsenella	3	133	139	0,8918	5	0,0446	0,9929	0,0420	RUM	+14
Acetone	Olsenella	Metabolite	Bacteria	AcetoneOlsenella	2	132	139	0,9970	5	0,9525	0,9998	0,0002	DUO	+14
Acetone	Olsenella	Metabolite	Bacteria	AcetoneOlsenella	2	132	139	0,9931	4	0,7035	0,9999	0,0069	DUO	72hL
Benzoate	Olsenella	Metabolite	Bacteria	BenzoateOlsenella	3	131	139	0,9559	7	0,7239	0,9937	0,0008	DUO	+100
Benzoate	Olsenella	Metabolite	Bacteria	BenzoateOlsenella	3	131	139	0,9337	6	0,5045	0,9929	0,0064	RUM	-14
Benzoate	Olsenella	Metabolite	Bacteria	BenzoateOlsenella	3	131	139	0,9025	5	0,0993	0,9936	0,0360	DUO	72hC
Valine	Olsenella	Metabolite	Bacteria	ValineOlsenella	1	131	139	0,8305	6	0,0579	0,9809	0,0407	DUO	-14
Glycerol	Olsenella	Metabolite	Bacteria	GlycerolOlsenella	1	130	139	0,9852	5	0,7868	0,9991	0,0022	DUO	+14
Carnitine	Olsenella	Metabolite	Bacteria	CarnitineOlsenella	3	130	139	0,9164	7	0,5273	0,9878	0,0037	DUO	+100
Imidazole	Olsenella	Metabolite	Bacteria	ImidazoleOlsenella	1	130	139	0,9155	7	0,5228	0,9876	0,0038	DUO	+100
Alanine	Olsenella	Metabolite	Bacteria	AlanineOlsenella	2	130	139	0,9435	6	0,5634	0,9940	0,0047	RUM	-14
Leucine	Olsenella	Metabolite	Bacteria	LeucineOlsenella	2	130	139	0,9068	7	0,4846	0,9863	0,0048	DUO	+100
Leucine	Olsenella	Metabolite	Bacteria	LeucineOlsenella	2	130	139	0,9702	5	0,6104	0,9981	0,0062	DUO	+14
Dimethylamine	Olsenella	Metabolite	Bacteria	DimethylamineOlsenella	4	130	139	0,8524	7	0,2774	0,9778	0,0148	DUO	+100
Dimethylamine	Olsenella	Metabolite	Bacteria	DimethylamineOlsenella	4	130	139	0,8972	6	0,3151	0,9888	0,0153	DUO	-14
Dimethylamine	Olsenella	Metabolite	Bacteria	DimethylamineOlsenella	4	130	139	-0,9313	5	-0,9956	-0,2751	0,0214	RUM	24hL
Alanine	Olsenella	Metabolite	Bacteria	AlanineOlsenella	2	130	139	0,9279	5	0,2519	0,9953	0,0230	DUO	+14
Carnitine	Olsenella	Metabolite	Bacteria	CarnitineOlsenella	3	130	139	0,9245	5	0,2291	0,9951	0,0246	DUO	+14
Carnitine	Olsenella	Metabolite	Bacteria	CarnitineOlsenella	3	130	139	0,8488	6	0,1198	0,9831	0,0325	DUO	-14
Dimethylamine	Olsenella	Metabolite	Bacteria	DimethylamineOlsenella	4	130	139	0,8847	5	0,0109	0,9924	0,0462	DUO	72hC
Ethanol	Olsenella	Metabolite	Bacteria	EthanolOlsenella	2	129	139	0,9665	5	0,5719	0,9979	0,0073	DUO	+14
Ethanol	Olsenella	Metabolite	Bacteria	EthanolOlsenella	2	129	139	0,8265	6	0,0453	0,9804	0,0426	DUO	-14
Glycine	Olsenella	Metabolite	Bacteria	GlycineOlsenella	6	127	139	0,9809	6	0,8300	0,9980	0,0005	DUO	+126
Glycine	Olsenella	Metabolite	Bacteria	GlycineOlsenella	6	127	139	0,9658	5	0,5648	0,9978	0,0076	DUO	+14
N-Phenylacetylglycine	Olsenella	Metabolite	Bacteria	N-PhenylacetylglycineOlsenella	4	127	139	0,9270	6	0,4660	0,9921	0,0078	DUO	-14
N-Phenylacetylglycine	Olsenella	Metabolite	Bacteria	N-PhenylacetylglycineOlsenella	4	127	139	0,9415	5	0,3498	0,9962	0,0168	RUM	+100
Glycine	Olsenella	Metabolite	Bacteria	GlycineOlsenella	6	127	139	0,9815	4	0,3604	0,9996	0,0185	DUO	+118
N-Phenylacetylglycine	Olsenella	Metabolite	Bacteria	N-PhenylacetylglycineOlsenella	4	127	139	0,8303	7	0,2060	0,9742	0,0208	DUO	+100
Glycine	Olsenella	Metabolite	Bacteria	GlycineOlsenella	6	127	139	0,8012	7	0,1213	0,9694	0,0303	DUO	+100
Glycine	Olsenella	Metabolite	Bacteria	GlycineOlsenella	6	127	139	0,9130	5	0,1581	0,9943	0,0304	DUO	72hC
N-Phenylacetylglycine	Olsenella	Metabolite	Bacteria	N-PhenylacetylglycineOlsenella	4	127	139	-0,8819	5	-0,9922	0,0017	0,0479	RUM	24hL
Glycine	Olsenella	Metabolite	Bacteria	GlycineOlsenella	6	127	139	0,8818	5	-0,0019	0,9922	0,0479	DUO	24hL
Butyrate	Olsenella	Metabolite	Bacteria	ButyrateOlsenella	1	126	139	0,9839	5	0,7708	0,9990	0,0024	DUO	+14
Phenylalanine	Olsenella	Metabolite	Bacteria	PhenylalanineOlsenella	3	126	139	0,9562	5	0,4724	0,9972	0,0109	RUM	+100
Phenylalanine	Olsenella	Metabolite	Bacteria	PhenylalanineOlsenella	3	126	139	0,8531	7	0,2798	0,9779	0,0147	DUO	+100
Phenylalanine	Olsenella	Metabolite	Bacteria	PhenylalanineOlsenella	3	126	139	-0,8887	5	-0,9927	-0,0297	0,0438	RUM	24hL
Maltose	Olsenella	Metabolite	Bacteria	MaltoseOlsenella	1	124	139	0,9927	5	0,8892	0,9995	0,0007	DUO	+14
Ferulate	Olsenella	Metabolite	Bacteria	FerulateOlsenella	2	124	139	0,9007	5	0,0900	0,9935	0,0370	DUO	24hL
Ferulate	Olsenella	Metabolite	Bacteria	FerulateOlsenella	2	124	139	0,7681	7	0,0358	0,9637	0,0437	DUO	24hC
Nicotinate	Olsenella	Metabolite	Bacteria	NicotinateOlsenella	3	123	139	-0,9367	5	-0,9959	-0,3137	0,0189	DUO	24hL
Nicotinate	Olsenella	Metabolite	Bacteria	NicotinateOlsenella	3	123	139	0,9280	5	0,2525	0,9953	0,0229	DUO	+14
Nicotinate	Olsenella	Metabolite	Bacteria	NicotinateOlsenella	3	123	139	0,9190	5	0,1940	0,9947	0,0273	RUM	+14
Isovalerate	Olsenella	Metabolite	Bacteria	IsovalerateOlsenella	3	119	139	0,8453	7	0,2539	0,9767	0,0166	DUO	+100
Isovalerate	Olsenella	Metabolite	Bacteria	IsovalerateOlsenella	3	119	139	0,8620	6	0,1677	0,9847	0,0273	RUM	12hL
Isovalerate	Olsenella	Metabolite	Bacteria	IsovalerateOlsenella	3	119	139	0,8132	6	0,0049	0,9788	0,0491	DUO	-14
Methanol	Olsenella	Metabolite	Bacteria	MethanolOlsenella	2	118	139	-0,8268	6	-0,9805	-0,0463	0,0424	DUO	-14
Methanol	Olsenella	Metabolite	Bacteria	MethanolOlsenella	2	118	139	0,7572	7	0,0097	0,9618	0,0487	DUO	+100
Histidine	Olsenella	Metabolite	Bacteria	HistidineOlsenella	3	116	139	0,9526	5	0,4405	0,9970	0,0123	DUO	72hC
Tyrosine	Olsenella	Metabolite	Bacteria	TyrosineOlsenella	3	116	139	0,9006	6	0,3308	0,9892	0,0143	RUM	-14
Tyrosine	Olsenella	Metabolite	Bacteria	TyrosineOlsenella	3	116	139	-0,9447	5	-0,9965	-0,3751	0,0155	RUM	24hL
Histidine	Olsenella	Metabolite	Bacteria	HistidineOlsenella	3	116	139	0,8907	6	0,2853	0,9880	0,0173	RUM	12hL
Tyrosine	Olsenella	Metabolite	Bacteria	TyrosineOlsenella	3	116	139	0,9399	5	0,3375	0,9961	0,0175	RUM	+100
Histidine	Olsenella	Metabolite	Bacteria	HistidineOlsenella	3	116	139	0,9515	4	-0,1118	0,9990	0,0485	DUO	72hL
Acetoacetate	Olsenella	Metabolite	Bacteria	AcetoacetateOlsenella	2	115	139	0,9871	5	0,8116	0,9992	0,0018	DUO	+14
Acetoacetate	Olsenella	Metabolite	Bacteria	AcetoacetateOlsenella	2	115	139	0,9374	5	0,3190	0,9960	0,0186	DUO	24hL
Xanthine	Olsenella	Metabolite	Bacteria	XanthineOlsenella	3	114	139	0,9780	5	0,6986	0,9986	0,0039	RUM	+14
Glutamate	Olsenella	Metabolite	Bacteria	GlutamateOlsenella	2	114	139	0,9635	5	0,5415	0,9977	0,0083	DUO	+14
Xanthine	Olsenella	Metabolite	Bacteria	XanthineOlsenella	3	114	139	0,9529	5	0,4431	0,9970	0,0122	DUO	+14
Glutamate	Olsenella	Metabolite	Bacteria	GlutamateOlsenella	2	114	139	0,9278	5	0,2509	0,9953	0,0230	DUO	24hL
Xanthine	Olsenella	Metabolite	Bacteria	XanthineOlsenella	3	114	139	0,8927	5	0,0490	0,9929	0,0415	DUO	24hL
Acetate	Olsenella	Metabolite	Bacteria	AcetateOlsenella	5	112	139	0,9937	5	0,9043	0,9996	0,0006	DUO	+14
Acetate	Olsenella	Metabolite	Bacteria	AcetateOlsenella	5	112	139	0,9786	6	0,8118	0,9978	0,0007	DUO	+126
Acetate	Olsenella	Metabolite	Bacteria	AcetateOlsenella	5	112	139	0,9451	7	0,6663	0,9921	0,0013	DUO	+100
3-Hydroxybutyrate	Olsenella	Metabolite	Bacteria	3-HydroxybutyrateOlsenella	1	112	139	0,9076	6	0,3646	0,9900	0,0124	DUO	-14
Acetate	Olsenella	Metabolite	Bacteria	AcetateOlsenella	5	112	139	0,9467	5	0,3908	0,9966	0,0147	DUO	24hL
Acetate	Olsenella	Metabolite	Bacteria	AcetateOlsenella	5	112	139	0,9675	4	0,0911	0,9993	0,0325	DUO	+118
Glucose	Olsenella	Metabolite	Bacteria	GlucoseOlsenella	2	110	139	0,9918	5	0,8767	0,9995	0,0009	DUO	+14
Ornithine	Olsenella	Metabolite	Bacteria	OrnithineOlsenella	2	110	139	0,9535	5	0,4490	0,9970	0,0119	DUO	24hL
Ornithine	Olsenella	Metabolite	Bacteria	OrnithineOlsenella	2	110	139	0,9298	5	0,2645	0,9955	0,0221	DUO	+14
Glucose	Olsenella	Metabolite	Bacteria	GlucoseOlsenella	2	110	139	0,9074	5	0,1261	0,9939	0,0333	DUO	24hL
Adipate	Olsenella	Metabolite	Bacteria	AdipateOlsenella	2	109	139	0,9888	5	0,8350	0,9993	0,0014	RUM	+14
Propionate	Olsenella	Metabolite	Bacteria	PropionateOlsenella	2	109	139	0,9883	5	0,8274	0,9993	0,0015	DUO	+14
Adipate	Olsenella	Metabolite	Bacteria	AdipateOlsenella	2	109	139	0,9875	5	0,8173	0,9992	0,0017	DUO	+14
Isoleucine	Olsenella	Metabolite	Bacteria	IsoleucineOlsenella	3	109	139	0,9686	5	0,5935	0,9980	0,0067	DUO	+14
Isoleucine	Olsenella	Metabolite	Bacteria	IsoleucineOlsenella	3	109	139	0,9177	6	0,4158	0,9911	0,0099	DUO	-14
Isoleucine	Olsenella	Metabolite	Bacteria	IsoleucineOlsenella	3	109	139	-0,9769	4	-0,9995	-0,2590	0,0231	DUO	72hL
Propionate	Olsenella	Metabolite	Bacteria	PropionateOlsenella	2	109	139	0,8425	6	0,0977	0,9824	0,0353	RUM	12hL
3-Hydroxyphenylacetate	Olsenella	Metabolite	Bacteria	3-HydroxyphenylacetateOlsenella	1	101	139	0,9399	5	0,3377	0,9961	0,0175	DUO	24hL
Urea	Olsenella	Metabolite	Bacteria	UreaOlsenella	2	65	139	0,8673	6	0,1881	0,9853	0,0253	RUM	-14
Urea	Olsenella	Metabolite	Bacteria	UreaOlsenella	2	65	139	0,8152	6	0,0107	0,9790	0,0481	RUM	72hL
Formate	Uncl. Bacteria	Metabolite	Bacteria	FormateUncl. Bacteria	1	178	134	0,9696	6	0,7414	0,9968	0,0014	DUO	-42
Choline	Uncl. Bacteria	Metabolite	Bacteria	CholineUncl. Bacteria	3	173	134	0,9701	6	0,7457	0,9969	0,0013	DUO	-42
Choline	Uncl. Bacteria	Metabolite	Bacteria	CholineUncl. Bacteria	3	173	134	0,9579	6	0,6575	0,9955	0,0026	RUM	72hC
Choline	Uncl. Bacteria	Metabolite	Bacteria	CholineUncl. Bacteria	3	173	134	-0,8152	6	-0,9790	-0,0108	0,0481	RUM	24hC
Fumarate	Uncl. Bacteria	Metabolite	Bacteria	FumarateUncl. Bacteria	1	166	134	0,9638	6	0,6987	0,9962	0,0019	DUO	-42
Proline	Uncl. Bacteria	Metabolite	Bacteria	ProlineUncl. Bacteria	3	165	134	0,9699	6	0,7438	0,9968	0,0013	DUO	-42
Proline	Uncl. Bacteria	Metabolite	Bacteria	ProlineUncl. Bacteria	3	165	134	-0,9817	5	-0,9988	-0,7431	0,0030	DUO	24hL
Proline	Uncl. Bacteria	Metabolite	Bacteria	ProlineUncl. Bacteria	3	165	134	0,9154	6	0,4036	0,9908	0,0104	RUM	72hC
Aspartate	Uncl. Bacteria	Metabolite	Bacteria	AspartateUncl. Bacteria	4	159	134	0,9675	6	0,7262	0,9966	0,0016	DUO	-42
Aspartate	Uncl. Bacteria	Metabolite	Bacteria	AspartateUncl. Bacteria	4	159	134	0,9708	5	0,6173	0,9982	0,0060	RUM	24hL
Aspartate	Uncl. Bacteria	Metabolite	Bacteria	AspartateUncl. Bacteria	4	159	134	-0,9549	5	-0,9971	-0,4613	0,0114	DUO	24hL
Aspartate	Uncl. Bacteria	Metabolite	Bacteria	AspartateUncl. Bacteria	4	159	134	0,9012	6	0,3335	0,9892	0,0142	RUM	72hC
Ribose	Uncl. Bacteria	Metabolite	Bacteria	RiboseUncl. Bacteria	5	158	134	0,9700	6	0,7443	0,9968	0,0013	DUO	-42
Ribose	Uncl. Bacteria	Metabolite	Bacteria	RiboseUncl. Bacteria	5	158	134	0,9730	5	0,6415	0,9983	0,0053	RUM	24hL
Ribose	Uncl. Bacteria	Metabolite	Bacteria	RiboseUncl. Bacteria	5	158	134	-0,9302	6	-0,9925	-0,4841	0,0071	RUM	+118
Ribose	Uncl. Bacteria	Metabolite	Bacteria	RiboseUncl. Bacteria	5	158	134	-0,9638	5	-0,9977	-0,5448	0,0082	DUO	24hL
Ribose	Uncl. Bacteria	Metabolite	Bacteria	RiboseUncl. Bacteria	5	158	134	-0,8395	6	-0,9820	-0,0878	0,0366	RUM	24hC
1,3-Dihydroxyacetone	Uncl. Bacteria	Metabolite	Bacteria	1,3-DihydroxyacetoneUncl. Bacteria	3	154	134	0,9909	6	0,9158	0,9990	0,0001	RUM	72hC
1,3-Dihydroxyacetone	Uncl. Bacteria	Metabolite	Bacteria	1,3-DihydroxyacetoneUncl. Bacteria	3	154	134	0,9695	6	0,7407	0,9968	0,0014	DUO	-42
Isopropanol	Uncl. Bacteria	Metabolite	Bacteria	IsopropanolUncl. Bacteria	3	154	134	0,9689	6	0,7360	0,9967	0,0014	DUO	-42
Isopropanol	Uncl. Bacteria	Metabolite	Bacteria	IsopropanolUncl. Bacteria	3	154	134	0,9027	5	0,1002	0,9936	0,0359	RUM	24hL
1,3-Dihydroxyacetone	Uncl. Bacteria	Metabolite	Bacteria	1,3-DihydroxyacetoneUncl. Bacteria	3	154	134	-0,9001	5	-0,9934	-0,0866	0,0373	DUO	24hL
Isopropanol	Uncl. Bacteria	Metabolite	Bacteria	IsopropanolUncl. Bacteria	3	154	134	-0,8167	6	-0,9792	-0,0152	0,0473	RUM	24hC
Lactate	Uncl. Bacteria	Metabolite	Bacteria	LactateUncl. Bacteria	3	153	134	0,9718	6	0,7580	0,9970	0,0012	DUO	-42
Lactate	Uncl. Bacteria	Metabolite	Bacteria	LactateUncl. Bacteria	3	153	134	0,9829	5	0,7579	0,9989	0,0027	RUM	24hL
Lactate	Uncl. Bacteria	Metabolite	Bacteria	LactateUncl. Bacteria	3	153	134	-0,9186	5	-0,9947	-0,1919	0,0275	DUO	24hL
Serine	Uncl. Bacteria	Metabolite	Bacteria	SerineUncl. Bacteria	3	152	134	0,9700	6	0,7449	0,9968	0,0013	DUO	-42
Serine	Uncl. Bacteria	Metabolite	Bacteria	SerineUncl. Bacteria	3	152	134	-0,9851	5	-0,9991	-0,7852	0,0022	DUO	24hL
Serine	Uncl. Bacteria	Metabolite	Bacteria	SerineUncl. Bacteria	3	152	134	0,9025	6	0,3400	0,9894	0,0138	RUM	72hC
Cadaverine	Uncl. Bacteria	Metabolite	Bacteria	CadaverineUncl. Bacteria	2	143	134	0,9792	6	0,8166	0,9978	0,0006	DUO	-42
Cadaverine	Uncl. Bacteria	Metabolite	Bacteria	CadaverineUncl. Bacteria	2	143	134	0,9904	5	0,8563	0,9994	0,0011	RUM	24hL
Uracil	Uncl. Bacteria	Metabolite	Bacteria	UracilUncl. Bacteria	1	143	134	0,9685	6	0,7334	0,9967	0,0015	DUO	-42
Lysine	Uncl. Bacteria	Metabolite	Bacteria	LysineUncl. Bacteria	3	140	134	-0,9969	5	-0,9998	-0,9516	0,0002	DUO	24hL
Succinate	Uncl. Bacteria	Metabolite	Bacteria	SuccinateUncl. Bacteria	1	140	134	0,9699	6	0,7436	0,9968	0,0013	DUO	-42
Lysine	Uncl. Bacteria	Metabolite	Bacteria	LysineUncl. Bacteria	3	140	134	0,9680	6	0,7293	0,9966	0,0015	DUO	-42
Lysine	Uncl. Bacteria	Metabolite	Bacteria	LysineUncl. Bacteria	3	140	134	0,9870	5	0,8105	0,9992	0,0018	RUM	24hL
Allantoin	Uncl. Bacteria	Metabolite	Bacteria	AllantoinUncl. Bacteria	2	140	134	0,8802	6	0,2405	0,9868	0,0207	RUM	72hC
Allantoin	Uncl. Bacteria	Metabolite	Bacteria	AllantoinUncl. Bacteria	2	140	134	0,9522	4	-0,1043	0,9990	0,0478	DUO	72hL
4-Hydroxybutyrate	Uncl. Bacteria	Metabolite	Bacteria	4-HydroxybutyrateUncl. Bacteria	2	139	134	0,9701	6	0,7453	0,9968	0,0013	DUO	-42
4-Hydroxybutyrate	Uncl. Bacteria	Metabolite	Bacteria	4-HydroxybutyrateUncl. Bacteria	2	139	134	-0,9823	5	-0,9989	-0,7505	0,0028	DUO	24hL
Trimethylamine	Uncl. Bacteria	Metabolite	Bacteria	TrimethylamineUncl. Bacteria	1	139	134	0,8711	6	0,2030	0,9858	0,0239	DUO	-42
Pimelate	Uncl. Bacteria	Metabolite	Bacteria	PimelateUncl. Bacteria	1	137	134	0,9593	6	0,6674	0,9957	0,0024	DUO	-42
N-nitrosodimethylamine	Uncl. Bacteria	Metabolite	Bacteria	N-nitrosodimethylamineUncl. Bacteria	3	136	134	0,9645	6	0,7036	0,9962	0,0019	DUO	-42
N-nitrosodimethylamine	Uncl. Bacteria	Metabolite	Bacteria	N-nitrosodimethylamineUncl. Bacteria	3	136	134	-0,9628	5	-0,9976	-0,5353	0,0086	DUO	24hL
N-nitrosodimethylamine	Uncl. Bacteria	Metabolite	Bacteria	N-nitrosodimethylamineUncl. Bacteria	3	136	134	-0,8843	6	-0,9873	-0,2578	0,0193	RUM	+118
Phenylacetate	Uncl. Bacteria	Metabolite	Bacteria	PhenylacetateUncl. Bacteria	3	134	134	0,9599	6	0,6709	0,9957	0,0024	DUO	-42
Phenylacetate	Uncl. Bacteria	Metabolite	Bacteria	PhenylacetateUncl. Bacteria	3	134	134	-0,8743	6	-0,9861	-0,2161	0,0227	RUM	+118
Phenylacetate	Uncl. Bacteria	Metabolite	Bacteria	PhenylacetateUncl. Bacteria	3	134	134	-0,8531	6	-0,9836	-0,1352	0,0308	RUM	24hC
Caffeine	Uncl. Bacteria	Metabolite	Bacteria	CaffeineUncl. Bacteria	2	133	134	0,9704	6	0,7475	0,9969	0,0013	DUO	-42
Hypoxanthine	Uncl. Bacteria	Metabolite	Bacteria	HypoxanthineUncl. Bacteria	3	133	134	0,9698	6	0,7431	0,9968	0,0014	DUO	-42
Valerate	Uncl. Bacteria	Metabolite	Bacteria	ValerateUncl. Bacteria	2	133	134	0,9569	6	0,6506	0,9954	0,0027	DUO	-42
Valerate	Uncl. Bacteria	Metabolite	Bacteria	ValerateUncl. Bacteria	2	133	134	-0,9743	5	-0,9984	-0,6554	0,0049	DUO	24hL
Caffeine	Uncl. Bacteria	Metabolite	Bacteria	CaffeineUncl. Bacteria	2	133	134	-0,9411	5	-0,9962	-0,3465	0,0170	DUO	24hL
Hypoxanthine	Uncl. Bacteria	Metabolite	Bacteria	HypoxanthineUncl. Bacteria	3	133	134	-0,8972	5	-0,9932	-0,0718	0,0389	DUO	24hL
Hypoxanthine	Uncl. Bacteria	Metabolite	Bacteria	HypoxanthineUncl. Bacteria	3	133	134	-0,7692	7	-0,9639	-0,0385	0,0432	DUO	+100
Acetone	Uncl. Bacteria	Metabolite	Bacteria	AcetoneUncl. Bacteria	2	132	134	0,9620	6	0,6860	0,9960	0,0021	DUO	-42
Acetone	Uncl. Bacteria	Metabolite	Bacteria	AcetoneUncl. Bacteria	2	132	134	-0,9792	5	-0,9987	-0,7125	0,0036	DUO	24hL
Valine	Uncl. Bacteria	Metabolite	Bacteria	ValineUncl. Bacteria	3	131	134	0,9695	6	0,7412	0,9968	0,0014	DUO	-42
Benzoate	Uncl. Bacteria	Metabolite	Bacteria	BenzoateUncl. Bacteria	3	131	134	0,9686	6	0,7341	0,9967	0,0015	DUO	-42
Valine	Uncl. Bacteria	Metabolite	Bacteria	ValineUncl. Bacteria	3	131	134	-0,9617	5	-0,9976	-0,5245	0,0089	DUO	24hL
Valine	Uncl. Bacteria	Metabolite	Bacteria	ValineUncl. Bacteria	3	131	134	0,9331	5	0,2874	0,9957	0,0206	RUM	24hL
Benzoate	Uncl. Bacteria	Metabolite	Bacteria	BenzoateUncl. Bacteria	3	131	134	-0,9328	5	-0,9957	-0,2855	0,0207	DUO	24hL
Benzoate	Uncl. Bacteria	Metabolite	Bacteria	BenzoateUncl. Bacteria	3	131	134	-0,7946	7	-0,9683	-0,1035	0,0327	DUO	+100
Leucine	Uncl. Bacteria	Metabolite	Bacteria	LeucineUncl. Bacteria	3	130	134	0,9707	6	0,7497	0,9969	0,0013	DUO	-42
Carnitine	Uncl. Bacteria	Metabolite	Bacteria	CarnitineUncl. Bacteria	2	130	134	0,9695	6	0,7410	0,9968	0,0014	DUO	-42
Glycerol	Uncl. Bacteria	Metabolite	Bacteria	GlycerolUncl. Bacteria	3	130	134	0,9694	6	0,7398	0,9968	0,0014	DUO	-42
Imidazole	Uncl. Bacteria	Metabolite	Bacteria	ImidazoleUncl. Bacteria	1	130	134	0,9690	6	0,7374	0,9967	0,0014	DUO	-42
Glycerol	Uncl. Bacteria	Metabolite	Bacteria	GlycerolUncl. Bacteria	3	130	134	-0,9885	5	-0,9993	-0,8311	0,0015	DUO	24hL
Leucine	Uncl. Bacteria	Metabolite	Bacteria	LeucineUncl. Bacteria	3	130	134	-0,9855	5	-0,9991	-0,7909	0,0021	DUO	24hL
Alanine	Uncl. Bacteria	Metabolite	Bacteria	AlanineUncl. Bacteria	3	130	134	0,9592	6	0,6664	0,9957	0,0025	DUO	-42
Leucine	Uncl. Bacteria	Metabolite	Bacteria	LeucineUncl. Bacteria	3	130	134	0,9833	5	0,7627	0,9989	0,0026	RUM	24hL
Alanine	Uncl. Bacteria	Metabolite	Bacteria	AlanineUncl. Bacteria	3	130	134	0,9482	5	0,4032	0,9967	0,0141	RUM	24hL
Carnitine	Uncl. Bacteria	Metabolite	Bacteria	CarnitineUncl. Bacteria	2	130	134	-0,8478	6	-0,9830	-0,1163	0,0330	RUM	+118
Alanine	Uncl. Bacteria	Metabolite	Bacteria	AlanineUncl. Bacteria	3	130	134	-0,8347	6	-0,9814	-0,0716	0,0387	RUM	24hC
Glycerol	Uncl. Bacteria	Metabolite	Bacteria	GlycerolUncl. Bacteria	3	130	134	-0,8206	6	-0,9797	-0,0272	0,0454	RUM	24hC
Ethanol	Uncl. Bacteria	Metabolite	Bacteria	EthanolUncl. Bacteria	4	129	134	0,9710	6	0,7525	0,9969	0,0012	DUO	-42
Ethanol	Uncl. Bacteria	Metabolite	Bacteria	EthanolUncl. Bacteria	4	129	134	-0,9144	6	-0,9907	-0,3989	0,0107	RUM	24hC
Ethanol	Uncl. Bacteria	Metabolite	Bacteria	EthanolUncl. Bacteria	4	129	134	-0,9405	5	-0,9962	-0,3421	0,0173	DUO	24hL
Ethanol	Uncl. Bacteria	Metabolite	Bacteria	EthanolUncl. Bacteria	4	129	134	0,9373	5	0,3180	0,9960	0,0187	RUM	24hL
2-Phenylpropionate	Uncl. Bacteria	Metabolite	Bacteria	2-PhenylpropionateUncl. Bacteria	4	127	134	0,9718	6	0,7580	0,9970	0,0012	DUO	-42
N-Phenylacetylglycine	Uncl. Bacteria	Metabolite	Bacteria	N-PhenylacetylglycineUncl. Bacteria	1	127	134	0,9696	6	0,7416	0,9968	0,0014	DUO	-42
2-Phenylpropionate	Uncl. Bacteria	Metabolite	Bacteria	2-PhenylpropionateUncl. Bacteria	4	127	134	-0,9655	6	-0,9964	-0,7109	0,0018	RUM	24hC
Glycine	Uncl. Bacteria	Metabolite	Bacteria	GlycineUncl. Bacteria	2	127	134	-0,9388	6	-0,9935	-0,5346	0,0055	RUM	24hC
Glycine	Uncl. Bacteria	Metabolite	Bacteria	GlycineUncl. Bacteria	2	127	134	-0,9215	6	-0,9915	-0,4363	0,0090	RUM	+118
2-Phenylpropionate	Uncl. Bacteria	Metabolite	Bacteria	2-PhenylpropionateUncl. Bacteria	4	127	134	0,8913	5	0,0422	0,9928	0,0423	RUM	24hL
2-Phenylpropionate	Uncl. Bacteria	Metabolite	Bacteria	2-PhenylpropionateUncl. Bacteria	4	127	134	-0,8867	5	-0,9925	-0,0202	0,0450	DUO	24hL
Phenylalanine	Uncl. Bacteria	Metabolite	Bacteria	PhenylalanineUncl. Bacteria	2	126	134	0,9747	6	0,7810	0,9973	0,0009	DUO	-42
Butyrate	Uncl. Bacteria	Metabolite	Bacteria	ButyrateUncl. Bacteria	3	126	134	0,9585	6	0,6618	0,9956	0,0025	DUO	-42
Phenylalanine	Uncl. Bacteria	Metabolite	Bacteria	PhenylalanineUncl. Bacteria	2	126	134	-0,9852	4	-0,9997	-0,4535	0,0148	DUO	72hL
Butyrate	Uncl. Bacteria	Metabolite	Bacteria	ButyrateUncl. Bacteria	3	126	134	-0,9451	5	-0,9965	-0,3781	0,0153	DUO	24hL
Butyrate	Uncl. Bacteria	Metabolite	Bacteria	ButyrateUncl. Bacteria	3	126	134	-0,8479	6	-0,9830	-0,1166	0,0329	RUM	24hC
Maltose	Uncl. Bacteria	Metabolite	Bacteria	MaltoseUncl. Bacteria	2	124	134	0,9689	6	0,7361	0,9967	0,0014	DUO	-42
Ferulate	Uncl. Bacteria	Metabolite	Bacteria	FerulateUncl. Bacteria	2	124	134	-0,9884	5	-0,9993	-0,8292	0,0015	DUO	24hL
Ferulate	Uncl. Bacteria	Metabolite	Bacteria	FerulateUncl. Bacteria	2	124	134	0,9597	6	0,6699	0,9957	0,0024	DUO	-42
Maltose	Uncl. Bacteria	Metabolite	Bacteria	MaltoseUncl. Bacteria	2	124	134	-0,9841	5	-0,9990	-0,7729	0,0024	DUO	24hL
Nicotinate	Uncl. Bacteria	Metabolite	Bacteria	NicotinateUncl. Bacteria	1	123	134	0,9698	6	0,7431	0,9968	0,0014	DUO	-42
3-Phenylpropionate	Uncl. Bacteria	Metabolite	Bacteria	3-PhenylpropionateUncl. Bacteria	1	121	134	0,9710	6	0,7519	0,9969	0,0013	DUO	-42
Methylamine	Uncl. Bacteria	Metabolite	Bacteria	MethylamineUncl. Bacteria	1	120	134	0,9773	6	0,8009	0,9976	0,0008	DUO	-42
Isovalerate	Uncl. Bacteria	Metabolite	Bacteria	IsovalerateUncl. Bacteria	1	119	134	0,9729	6	0,7667	0,9971	0,0011	DUO	-42
Methanol	Uncl. Bacteria	Metabolite	Bacteria	MethanolUncl. Bacteria	1	118	134	0,9704	6	0,7478	0,9969	0,0013	DUO	-42
Tyrosine	Uncl. Bacteria	Metabolite	Bacteria	TyrosineUncl. Bacteria	1	116	134	0,9728	6	0,7660	0,9971	0,0011	DUO	-42
Histidine	Uncl. Bacteria	Metabolite	Bacteria	HistidineUncl. Bacteria	1	116	134	0,9703	6	0,7472	0,9969	0,0013	DUO	-42
Acetoacetate	Uncl. Bacteria	Metabolite	Bacteria	AcetoacetateUncl. Bacteria	2	115	134	-0,9932	5	-0,9996	-0,8966	0,0007	DUO	24hL
Acetoacetate	Uncl. Bacteria	Metabolite	Bacteria	AcetoacetateUncl. Bacteria	2	115	134	0,9638	6	0,6988	0,9962	0,0019	DUO	-42
Glutamate	Uncl. Bacteria	Metabolite	Bacteria	GlutamateUncl. Bacteria	3	114	134	0,9691	6	0,7377	0,9967	0,0014	DUO	-42
Xanthine	Uncl. Bacteria	Metabolite	Bacteria	XanthineUncl. Bacteria	2	114	134	0,9653	6	0,7100	0,9963	0,0018	DUO	-42
Glutamate	Uncl. Bacteria	Metabolite	Bacteria	GlutamateUncl. Bacteria	3	114	134	-0,9631	5	-0,9977	-0,5382	0,0085	DUO	24hL
Xanthine	Uncl. Bacteria	Metabolite	Bacteria	XanthineUncl. Bacteria	2	114	134	-0,9552	5	-0,9971	-0,4638	0,0113	DUO	24hL
Glutamate	Uncl. Bacteria	Metabolite	Bacteria	GlutamateUncl. Bacteria	3	114	134	0,9346	5	0,2983	0,9958	0,0199	DUO	12hC
3-Hydroxybutyrate	Uncl. Bacteria	Metabolite	Bacteria	3-HydroxybutyrateUncl. Bacteria	3	112	134	0,9596	6	0,6689	0,9957	0,0024	DUO	-42
Acetate	Uncl. Bacteria	Metabolite	Bacteria	AcetateUncl. Bacteria	2	112	134	-0,8619	6	-0,9847	-0,1674	0,0273	RUM	24hC
Acetate	Uncl. Bacteria	Metabolite	Bacteria	AcetateUncl. Bacteria	2	112	134	-0,9168	5	-0,9946	-0,1804	0,0285	DUO	24hL
3-Hydroxybutyrate	Uncl. Bacteria	Metabolite	Bacteria	3-HydroxybutyrateUncl. Bacteria	3	112	134	0,9060	5	0,1181	0,9938	0,0341	RUM	24hL
3-Hydroxybutyrate	Uncl. Bacteria	Metabolite	Bacteria	3-HydroxybutyrateUncl. Bacteria	3	112	134	0,8831	5	0,0037	0,9923	0,0471	DUO	72hC
Ornithine	Uncl. Bacteria	Metabolite	Bacteria	OrnithineUncl. Bacteria	2	110	134	-0,9938	5	-0,9996	-0,9060	0,0006	DUO	24hL
Glucose	Uncl. Bacteria	Metabolite	Bacteria	GlucoseUncl. Bacteria	3	110	134	-0,9869	5	-0,9992	-0,8087	0,0018	DUO	24hL
Glucose	Uncl. Bacteria	Metabolite	Bacteria	GlucoseUncl. Bacteria	3	110	134	0,9569	6	0,6508	0,9954	0,0027	DUO	-42
Ornithine	Uncl. Bacteria	Metabolite	Bacteria	OrnithineUncl. Bacteria	2	110	134	0,9380	6	0,5299	0,9934	0,0056	DUO	-42
Glucose	Uncl. Bacteria	Metabolite	Bacteria	GlucoseUncl. Bacteria	3	110	134	-0,9142	6	-0,9907	-0,3979	0,0107	RUM	24hC
Isoleucine	Uncl. Bacteria	Metabolite	Bacteria	IsoleucineUncl. Bacteria	4	109	134	0,9728	6	0,7658	0,9971	0,0011	DUO	-42
Propionate	Uncl. Bacteria	Metabolite	Bacteria	PropionateUncl. Bacteria	1	109	134	0,9627	6	0,6909	0,9961	0,0021	DUO	-42
Adipate	Uncl. Bacteria	Metabolite	Bacteria	AdipateUncl. Bacteria	4	109	134	0,9596	6	0,6694	0,9957	0,0024	DUO	-42
Adipate	Uncl. Bacteria	Metabolite	Bacteria	AdipateUncl. Bacteria	4	109	134	-0,9675	5	-0,9979	-0,5817	0,0070	DUO	24hL
Isoleucine	Uncl. Bacteria	Metabolite	Bacteria	IsoleucineUncl. Bacteria	4	109	134	-0,9594	5	-0,9974	-0,5021	0,0098	DUO	24hL
Isoleucine	Uncl. Bacteria	Metabolite	Bacteria	IsoleucineUncl. Bacteria	4	109	134	-0,9093	6	-0,9902	-0,3729	0,0120	RUM	24hC
Adipate	Uncl. Bacteria	Metabolite	Bacteria	AdipateUncl. Bacteria	4	109	134	-0,8955	6	-0,9886	-0,3072	0,0158	DUO	-14
Isoleucine	Uncl. Bacteria	Metabolite	Bacteria	IsoleucineUncl. Bacteria	4	109	134	0,9231	5	0,2202	0,9950	0,0253	RUM	24hL
Adipate	Uncl. Bacteria	Metabolite	Bacteria	AdipateUncl. Bacteria	4	109	134	-0,8610	6	-0,9846	-0,1640	0,0276	RUM	24hC
Isobutyrate	Uncl. Bacteria	Metabolite	Bacteria	IsobutyrateUncl. Bacteria	2	103	134	0,9763	6	0,7932	0,9975	0,0008	DUO	-42
Isobutyrate	Uncl. Bacteria	Metabolite	Bacteria	IsobutyrateUncl. Bacteria	2	103	134	0,8521	6	0,1315	0,9835	0,0312	RUM	72hC
3-Hydroxyphenylacetate	Uncl. Bacteria	Metabolite	Bacteria	3-HydroxyphenylacetateUncl. Bacteria	3	101	134	0,9554	6	0,6401	0,9953	0,0029	DUO	-42
3-Hydroxyphenylacetate	Uncl. Bacteria	Metabolite	Bacteria	3-HydroxyphenylacetateUncl. Bacteria	3	101	134	-0,9317	5	-0,9956	-0,2776	0,0212	RUM	+100
3-Hydroxyphenylacetate	Uncl. Bacteria	Metabolite	Bacteria	3-HydroxyphenylacetateUncl. Bacteria	3	101	134	-0,9293	5	-0,9954	-0,2610	0,0223	DUO	24hL
Urea	Uncl. Bacteria	Metabolite	Bacteria	UreaUncl. Bacteria	1	65	134	0,8918	6	0,2906	0,9882	0,0169	RUM	72hC
Formate	Lachnospiracea_incertae_sedis	Metabolite	Bacteria	FormateLachnospiracea_incertae_sedis	2	178	131	0,9452	7	0,6668	0,9921	0,0013	DUO	+100
Formate	Lachnospiracea_incertae_sedis	Metabolite	Bacteria	FormateLachnospiracea_incertae_sedis	2	178	131	0,9103	6	0,3779	0,9903	0,0117	RUM	24hC
Choline	Lachnospiracea_incertae_sedis	Metabolite	Bacteria	CholineLachnospiracea_incertae_sedis	1	173	131	0,8267	6	0,0460	0,9805	0,0424	RUM	72hL
Fumarate	Lachnospiracea_incertae_sedis	Metabolite	Bacteria	FumarateLachnospiracea_incertae_sedis	1	166	131	0,8564	7	0,2910	0,9784	0,0139	DUO	+100
Proline	Lachnospiracea_incertae_sedis	Metabolite	Bacteria	ProlineLachnospiracea_incertae_sedis	2	165	131	0,9620	5	0,5268	0,9976	0,0089	DUO	24hL
Proline	Lachnospiracea_incertae_sedis	Metabolite	Bacteria	ProlineLachnospiracea_incertae_sedis	2	165	131	0,8162	7	0,1639	0,9719	0,0251	DUO	+100
Aspartate	Lachnospiracea_incertae_sedis	Metabolite	Bacteria	AspartateLachnospiracea_incertae_sedis	4	159	131	0,9613	5	0,5206	0,9975	0,0091	DUO	24hL
Aspartate	Lachnospiracea_incertae_sedis	Metabolite	Bacteria	AspartateLachnospiracea_incertae_sedis	4	159	131	0,9015	6	0,3349	0,9893	0,0141	RUM	24hC
Aspartate	Lachnospiracea_incertae_sedis	Metabolite	Bacteria	AspartateLachnospiracea_incertae_sedis	4	159	131	0,9022	5	0,0976	0,9936	0,0362	DUO	12hC
Aspartate	Lachnospiracea_incertae_sedis	Metabolite	Bacteria	AspartateLachnospiracea_incertae_sedis	4	159	131	0,8947	5	0,0590	0,9931	0,0404	RUM	+14
Ribose	Lachnospiracea_incertae_sedis	Metabolite	Bacteria	RiboseLachnospiracea_incertae_sedis	2	158	131	0,9976	5	0,9618	0,9998	0,0001	DUO	24hL
Ribose	Lachnospiracea_incertae_sedis	Metabolite	Bacteria	RiboseLachnospiracea_incertae_sedis	2	158	131	0,9217	5	0,2113	0,9949	0,0260	RUM	+14
Isopropanol	Lachnospiracea_incertae_sedis	Metabolite	Bacteria	IsopropanolLachnospiracea_incertae_sedis	1	154	131	0,8351	7	0,2209	0,9750	0,0194	DUO	+100
1,3-Dihydroxyacetone	Lachnospiracea_incertae_sedis	Metabolite	Bacteria	1,3-DihydroxyacetoneLachnospiracea_incertae_sedis	1	154	131	0,9039	5	0,1068	0,9937	0,0352	DUO	24hL
Lactate	Lachnospiracea_incertae_sedis	Metabolite	Bacteria	LactateLachnospiracea_incertae_sedis	3	153	131	0,9859	5	0,7968	0,9991	0,0020	DUO	24hL
Lactate	Lachnospiracea_incertae_sedis	Metabolite	Bacteria	LactateLachnospiracea_incertae_sedis	3	153	131	0,9262	5	0,2404	0,9952	0,0238	RUM	+14
Lactate	Lachnospiracea_incertae_sedis	Metabolite	Bacteria	LactateLachnospiracea_incertae_sedis	3	153	131	0,8281	6	0,0504	0,9806	0,0418	RUM	72hL
Serine	Lachnospiracea_incertae_sedis	Metabolite	Bacteria	SerineLachnospiracea_incertae_sedis	1	152	131	0,9797	5	0,7189	0,9987	0,0034	DUO	24hL
Uracil	Lachnospiracea_incertae_sedis	Metabolite	Bacteria	UracilLachnospiracea_incertae_sedis	3	143	131	0,9504	7	0,6942	0,9929	0,0010	DUO	+100
Uracil	Lachnospiracea_incertae_sedis	Metabolite	Bacteria	UracilLachnospiracea_incertae_sedis	3	143	131	0,9716	6	0,7570	0,9970	0,0012	RUM	+126
Uracil	Lachnospiracea_incertae_sedis	Metabolite	Bacteria	UracilLachnospiracea_incertae_sedis	3	143	131	0,8778	6	0,2302	0,9865	0,0215	RUM	24hC
Cadaverine	Lachnospiracea_incertae_sedis	Metabolite	Bacteria	CadaverineLachnospiracea_incertae_sedis	2	143	131	0,7940	7	0,1019	0,9682	0,0330	DUO	+100
Cadaverine	Lachnospiracea_incertae_sedis	Metabolite	Bacteria	CadaverineLachnospiracea_incertae_sedis	2	143	131	-0,8991	5	-0,9934	-0,0813	0,0379	DUO	+14
Succinate	Lachnospiracea_incertae_sedis	Metabolite	Bacteria	SuccinateLachnospiracea_incertae_sedis	5	140	131	0,9829	6	0,8472	0,9982	0,0004	RUM	72hL
Allantoin	Lachnospiracea_incertae_sedis	Metabolite	Bacteria	AllantoinLachnospiracea_incertae_sedis	2	140	131	0,9863	4	0,4837	0,9997	0,0137	DUO	+118
Lysine	Lachnospiracea_incertae_sedis	Metabolite	Bacteria	LysineLachnospiracea_incertae_sedis	3	140	131	0,9407	5	0,3433	0,9962	0,0172	DUO	24hL
Succinate	Lachnospiracea_incertae_sedis	Metabolite	Bacteria	SuccinateLachnospiracea_incertae_sedis	5	140	131	0,9404	5	0,3410	0,9962	0,0173	RUM	+14
Succinate	Lachnospiracea_incertae_sedis	Metabolite	Bacteria	SuccinateLachnospiracea_incertae_sedis	5	140	131	0,8658	6	0,1823	0,9851	0,0258	RUM	24hC
Allantoin	Lachnospiracea_incertae_sedis	Metabolite	Bacteria	AllantoinLachnospiracea_incertae_sedis	2	140	131	-0,9153	5	-0,9945	-0,1714	0,0292	DUO	24hL
Lysine	Lachnospiracea_incertae_sedis	Metabolite	Bacteria	LysineLachnospiracea_incertae_sedis	3	140	131	-0,8530	6	-0,9836	-0,1345	0,0308	RUM	+118
Succinate	Lachnospiracea_incertae_sedis	Metabolite	Bacteria	SuccinateLachnospiracea_incertae_sedis	5	140	131	0,8950	5	0,0607	0,9931	0,0402	DUO	12hC
Succinate	Lachnospiracea_incertae_sedis	Metabolite	Bacteria	SuccinateLachnospiracea_incertae_sedis	5	140	131	0,8315	6	0,0613	0,9810	0,0402	RUM	+126
Lysine	Lachnospiracea_incertae_sedis	Metabolite	Bacteria	LysineLachnospiracea_incertae_sedis	3	140	131	0,8158	6	0,0126	0,9791	0,0478	RUM	72hL
Trimethylamine	Lachnospiracea_incertae_sedis	Metabolite	Bacteria	TrimethylamineLachnospiracea_incertae_sedis	2	139	131	0,9486	6	0,5957	0,9945	0,0039	RUM	+126
4-Hydroxybutyrate	Lachnospiracea_incertae_sedis	Metabolite	Bacteria	4-HydroxybutyrateLachnospiracea_incertae_sedis	3	139	131	0,8918	7	0,4223	0,9840	0,0070	DUO	+100
4-Hydroxybutyrate	Lachnospiracea_incertae_sedis	Metabolite	Bacteria	4-HydroxybutyrateLachnospiracea_incertae_sedis	3	139	131	0,9550	5	0,4624	0,9971	0,0114	DUO	24hL
Trimethylamine	Lachnospiracea_incertae_sedis	Metabolite	Bacteria	TrimethylamineLachnospiracea_incertae_sedis	2	139	131	0,8617	7	0,3095	0,9793	0,0127	DUO	+100
4-Hydroxybutyrate	Lachnospiracea_incertae_sedis	Metabolite	Bacteria	4-HydroxybutyrateLachnospiracea_incertae_sedis	3	139	131	-0,8268	6	-0,9805	-0,0462	0,0424	DUO	+126
Pimelate	Lachnospiracea_incertae_sedis	Metabolite	Bacteria	PimelateLachnospiracea_incertae_sedis	3	137	131	0,9307	5	0,2706	0,9955	0,0217	RUM	24hL
Pimelate	Lachnospiracea_incertae_sedis	Metabolite	Bacteria	PimelateLachnospiracea_incertae_sedis	3	137	131	-0,8759	6	-0,9863	-0,2224	0,0222	DUO	+126
Pimelate	Lachnospiracea_incertae_sedis	Metabolite	Bacteria	PimelateLachnospiracea_incertae_sedis	3	137	131	0,9001	5	0,0865	0,9934	0,0373	DUO	24hL
N-nitrosodimethylamine	Lachnospiracea_incertae_sedis	Metabolite	Bacteria	N-nitrosodimethylamineLachnospiracea_incertae_sedis	3	136	131	0,9440	5	0,3692	0,9964	0,0158	DUO	24hL
N-nitrosodimethylamine	Lachnospiracea_incertae_sedis	Metabolite	Bacteria	N-nitrosodimethylamineLachnospiracea_incertae_sedis	3	136	131	-0,8273	6	-0,9805	-0,0478	0,0422	DUO	+126
N-nitrosodimethylamine	Lachnospiracea_incertae_sedis	Metabolite	Bacteria	N-nitrosodimethylamineLachnospiracea_incertae_sedis	3	136	131	0,8249	6	0,0405	0,9802	0,0433	RUM	24hC
Phenylacetate	Lachnospiracea_incertae_sedis	Metabolite	Bacteria	PhenylacetateLachnospiracea_incertae_sedis	2	134	131	0,9493	6	0,5998	0,9946	0,0038	RUM	+126
Phenylacetate	Lachnospiracea_incertae_sedis	Metabolite	Bacteria	PhenylacetateLachnospiracea_incertae_sedis	2	134	131	0,8852	7	0,3964	0,9830	0,0081	DUO	+100
Hypoxanthine	Lachnospiracea_incertae_sedis	Metabolite	Bacteria	HypoxanthineLachnospiracea_incertae_sedis	5	133	131	0,9723	7	0,8186	0,9960	0,0002	DUO	+100
Caffeine	Lachnospiracea_incertae_sedis	Metabolite	Bacteria	CaffeineLachnospiracea_incertae_sedis	3	133	131	0,9000	7	0,4560	0,9853	0,0058	DUO	+100
Caffeine	Lachnospiracea_incertae_sedis	Metabolite	Bacteria	CaffeineLachnospiracea_incertae_sedis	3	133	131	0,9641	5	0,5473	0,9977	0,0081	DUO	24hL
Hypoxanthine	Lachnospiracea_incertae_sedis	Metabolite	Bacteria	HypoxanthineLachnospiracea_incertae_sedis	5	133	131	0,9110	6	0,3815	0,9904	0,0115	RUM	+126
Valerate	Lachnospiracea_incertae_sedis	Metabolite	Bacteria	ValerateLachnospiracea_incertae_sedis	1	133	131	-0,8801	6	-0,9868	-0,2399	0,0207	DUO	+126
Caffeine	Lachnospiracea_incertae_sedis	Metabolite	Bacteria	CaffeineLachnospiracea_incertae_sedis	3	133	131	0,8798	6	0,2384	0,9868	0,0208	RUM	72hC
Hypoxanthine	Lachnospiracea_incertae_sedis	Metabolite	Bacteria	HypoxanthineLachnospiracea_incertae_sedis	5	133	131	-0,9073	5	-0,9939	-0,1252	0,0334	RUM	+100
Hypoxanthine	Lachnospiracea_incertae_sedis	Metabolite	Bacteria	HypoxanthineLachnospiracea_incertae_sedis	5	133	131	0,8381	6	0,0831	0,9818	0,0372	RUM	24hC
Hypoxanthine	Lachnospiracea_incertae_sedis	Metabolite	Bacteria	HypoxanthineLachnospiracea_incertae_sedis	5	133	131	0,8838	5	0,0070	0,9923	0,0467	DUO	24hL
Acetone	Lachnospiracea_incertae_sedis	Metabolite	Bacteria	AcetoneLachnospiracea_incertae_sedis	2	132	131	0,9620	6	0,6862	0,9960	0,0021	RUM	+126
Acetone	Lachnospiracea_incertae_sedis	Metabolite	Bacteria	AcetoneLachnospiracea_incertae_sedis	2	132	131	0,9841	5	0,7726	0,9990	0,0024	DUO	24hL
Benzoate	Lachnospiracea_incertae_sedis	Metabolite	Bacteria	BenzoateLachnospiracea_incertae_sedis	4	131	131	0,9813	7	0,8746	0,9973	<,0001	DUO	+100
Benzoate	Lachnospiracea_incertae_sedis	Metabolite	Bacteria	BenzoateLachnospiracea_incertae_sedis	4	131	131	0,9866	5	0,8057	0,9992	0,0019	DUO	24hL
Benzoate	Lachnospiracea_incertae_sedis	Metabolite	Bacteria	BenzoateLachnospiracea_incertae_sedis	4	131	131	0,9458	6	0,5774	0,9942	0,0043	RUM	+126
Valine	Lachnospiracea_incertae_sedis	Metabolite	Bacteria	ValineLachnospiracea_incertae_sedis	1	131	131	0,9401	5	0,3387	0,9961	0,0175	DUO	24hL
Benzoate	Lachnospiracea_incertae_sedis	Metabolite	Bacteria	BenzoateLachnospiracea_incertae_sedis	4	131	131	0,8704	6	0,2006	0,9857	0,0241	DUO	-14
Leucine	Lachnospiracea_incertae_sedis	Metabolite	Bacteria	LeucineLachnospiracea_incertae_sedis	3	130	131	0,9586	7	0,7389	0,9941	0,0007	DUO	+100
Imidazole	Lachnospiracea_incertae_sedis	Metabolite	Bacteria	ImidazoleLachnospiracea_incertae_sedis	3	130	131	0,9551	7	0,7197	0,9936	0,0008	DUO	+100
Glycerol	Lachnospiracea_incertae_sedis	Metabolite	Bacteria	GlycerolLachnospiracea_incertae_sedis	2	130	131	0,9818	5	0,7443	0,9989	0,0029	DUO	24hL
Carnitine	Lachnospiracea_incertae_sedis	Metabolite	Bacteria	CarnitineLachnospiracea_incertae_sedis	3	130	131	0,9377	6	0,5276	0,9933	0,0057	RUM	+126
Leucine	Lachnospiracea_incertae_sedis	Metabolite	Bacteria	LeucineLachnospiracea_incertae_sedis	3	130	131	0,9693	5	0,6014	0,9981	0,0064	DUO	24hL
Dimethylamine	Lachnospiracea_incertae_sedis	Metabolite	Bacteria	DimethylamineLachnospiracea_incertae_sedis	1	130	131	0,9159	6	0,4065	0,9909	0,0103	RUM	24hC
Glycerol	Lachnospiracea_incertae_sedis	Metabolite	Bacteria	GlycerolLachnospiracea_incertae_sedis	2	130	131	0,9275	5	0,2488	0,9953	0,0232	DUO	12hC
Alanine	Lachnospiracea_incertae_sedis	Metabolite	Bacteria	AlanineLachnospiracea_incertae_sedis	2	130	131	-0,8625	6	-0,9848	-0,1697	0,0271	DUO	+126
Carnitine	Lachnospiracea_incertae_sedis	Metabolite	Bacteria	CarnitineLachnospiracea_incertae_sedis	3	130	131	-0,8574	6	-0,9841	-0,1505	0,0291	DUO	+126
Leucine	Lachnospiracea_incertae_sedis	Metabolite	Bacteria	LeucineLachnospiracea_incertae_sedis	3	130	131	-0,8525	6	-0,9836	-0,1327	0,0310	DUO	+126
Imidazole	Lachnospiracea_incertae_sedis	Metabolite	Bacteria	ImidazoleLachnospiracea_incertae_sedis	3	130	131	0,8360	6	0,0759	0,9816	0,0382	RUM	24hC
Imidazole	Lachnospiracea_incertae_sedis	Metabolite	Bacteria	ImidazoleLachnospiracea_incertae_sedis	3	130	131	0,8189	6	0,0217	0,9795	0,0462	RUM	+126
Carnitine	Lachnospiracea_incertae_sedis	Metabolite	Bacteria	CarnitineLachnospiracea_incertae_sedis	3	130	131	0,7616	7	0,0200	0,9626	0,0466	DUO	+100
Alanine	Lachnospiracea_incertae_sedis	Metabolite	Bacteria	AlanineLachnospiracea_incertae_sedis	2	130	131	0,7565	7	0,0079	0,9617	0,0491	DUO	+100
Ethanol	Lachnospiracea_incertae_sedis	Metabolite	Bacteria	EthanolLachnospiracea_incertae_sedis	2	129	131	0,9974	5	0,9593	0,9998	0,0002	DUO	24hL
Ethanol	Lachnospiracea_incertae_sedis	Metabolite	Bacteria	EthanolLachnospiracea_incertae_sedis	2	129	131	0,8795	5	-0,0124	0,9920	0,0493	DUO	12hC
N-Phenylacetylglycine	Lachnospiracea_incertae_sedis	Metabolite	Bacteria	N-PhenylacetylglycineLachnospiracea_incertae_sedis	5	127	131	0,9388	6	0,5343	0,9935	0,0055	RUM	+126
Glycine	Lachnospiracea_incertae_sedis	Metabolite	Bacteria	GlycineLachnospiracea_incertae_sedis	2	127	131	0,8771	7	0,3655	0,9817	0,0095	DUO	+100
2-Phenylpropionate	Lachnospiracea_incertae_sedis	Metabolite	Bacteria	2-PhenylpropionateLachnospiracea_incertae_sedis	1	127	131	0,9541	5	0,4542	0,9971	0,0117	DUO	24hL
N-Phenylacetylglycine	Lachnospiracea_incertae_sedis	Metabolite	Bacteria	N-PhenylacetylglycineLachnospiracea_incertae_sedis	5	127	131	-0,8728	6	-0,9860	-0,2101	0,0232	RUM	72hC
N-Phenylacetylglycine	Lachnospiracea_incertae_sedis	Metabolite	Bacteria	N-PhenylacetylglycineLachnospiracea_incertae_sedis	5	127	131	0,9219	5	0,2123	0,9949	0,0259	DUO	24hL
Glycine	Lachnospiracea_incertae_sedis	Metabolite	Bacteria	GlycineLachnospiracea_incertae_sedis	2	127	131	0,8317	6	0,0620	0,9811	0,0401	RUM	+126
N-Phenylacetylglycine	Lachnospiracea_incertae_sedis	Metabolite	Bacteria	N-PhenylacetylglycineLachnospiracea_incertae_sedis	5	127	131	0,7589	7	0,0136	0,9621	0,0479	DUO	+100
N-Phenylacetylglycine	Lachnospiracea_incertae_sedis	Metabolite	Bacteria	N-PhenylacetylglycineLachnospiracea_incertae_sedis	5	127	131	0,8785	5	-0,0168	0,9919	0,0499	RUM	+100
Phenylalanine	Lachnospiracea_incertae_sedis	Metabolite	Bacteria	PhenylalanineLachnospiracea_incertae_sedis	2	126	131	0,9279	6	0,4713	0,9923	0,0076	RUM	+126
Butyrate	Lachnospiracea_incertae_sedis	Metabolite	Bacteria	ButyrateLachnospiracea_incertae_sedis	2	126	131	0,9514	5	0,4306	0,9969	0,0128	DUO	24hL
Butyrate	Lachnospiracea_incertae_sedis	Metabolite	Bacteria	ButyrateLachnospiracea_incertae_sedis	2	126	131	-0,8765	6	-0,9864	-0,2248	0,0219	DUO	+126
Phenylalanine	Lachnospiracea_incertae_sedis	Metabolite	Bacteria	PhenylalanineLachnospiracea_incertae_sedis	2	126	131	0,8250	7	0,1899	0,9733	0,0223	DUO	+100
Maltose	Lachnospiracea_incertae_sedis	Metabolite	Bacteria	MaltoseLachnospiracea_incertae_sedis	3	124	131	0,9865	5	0,8035	0,9991	0,0019	DUO	24hL
Ferulate	Lachnospiracea_incertae_sedis	Metabolite	Bacteria	FerulateLachnospiracea_incertae_sedis	2	124	131	0,9575	6	0,6545	0,9955	0,0027	RUM	+126
Ferulate	Lachnospiracea_incertae_sedis	Metabolite	Bacteria	FerulateLachnospiracea_incertae_sedis	2	124	131	0,9724	5	0,6339	0,9982	0,0055	DUO	24hL
Maltose	Lachnospiracea_incertae_sedis	Metabolite	Bacteria	MaltoseLachnospiracea_incertae_sedis	3	124	131	0,9064	6	0,3588	0,9898	0,0127	RUM	+126
Maltose	Lachnospiracea_incertae_sedis	Metabolite	Bacteria	MaltoseLachnospiracea_incertae_sedis	3	124	131	-0,8645	6	-0,9850	-0,1774	0,0263	DUO	+126
Nicotinate	Lachnospiracea_incertae_sedis	Metabolite	Bacteria	NicotinateLachnospiracea_incertae_sedis	1	123	131	0,9482	6	0,5930	0,9945	0,0040	RUM	24hC
3-Phenylpropionate	Lachnospiracea_incertae_sedis	Metabolite	Bacteria	3-PhenylpropionateLachnospiracea_incertae_sedis	1	121	131	0,9166	5	0,1797	0,9946	0,0285	DUO	12hC
Methanol	Lachnospiracea_incertae_sedis	Metabolite	Bacteria	MethanolLachnospiracea_incertae_sedis	1	118	131	-0,9629	4	-0,9992	-0,0241	0,0371	DUO	72hL
Histidine	Lachnospiracea_incertae_sedis	Metabolite	Bacteria	HistidineLachnospiracea_incertae_sedis	1	116	131	0,9585	6	0,6612	0,9956	0,0026	RUM	+126
Tyrosine	Lachnospiracea_incertae_sedis	Metabolite	Bacteria	TyrosineLachnospiracea_incertae_sedis	1	116	131	0,9272	6	0,4671	0,9922	0,0078	RUM	+126
Acetoacetate	Lachnospiracea_incertae_sedis	Metabolite	Bacteria	AcetoacetateLachnospiracea_incertae_sedis	3	115	131	-0,8870	6	-0,9876	-0,2692	0,0184	DUO	+126
Acetoacetate	Lachnospiracea_incertae_sedis	Metabolite	Bacteria	AcetoacetateLachnospiracea_incertae_sedis	3	115	131	0,8453	6	0,1075	0,9827	0,0340	RUM	24hC
Acetoacetate	Lachnospiracea_incertae_sedis	Metabolite	Bacteria	AcetoacetateLachnospiracea_incertae_sedis	3	115	131	0,9046	5	0,1104	0,9938	0,0349	DUO	24hL
Xanthine	Lachnospiracea_incertae_sedis	Metabolite	Bacteria	XanthineLachnospiracea_incertae_sedis	5	114	131	0,9278	6	0,4703	0,9922	0,0076	RUM	+126
Xanthine	Lachnospiracea_incertae_sedis	Metabolite	Bacteria	XanthineLachnospiracea_incertae_sedis	5	114	131	0,9508	5	0,4252	0,9968	0,0130	DUO	24hL
Xanthine	Lachnospiracea_incertae_sedis	Metabolite	Bacteria	XanthineLachnospiracea_incertae_sedis	5	114	131	0,8398	7	0,2361	0,9758	0,0181	DUO	+100
Xanthine	Lachnospiracea_incertae_sedis	Metabolite	Bacteria	XanthineLachnospiracea_incertae_sedis	5	114	131	0,8845	6	0,2585	0,9873	0,0192	RUM	24hC
Glutamate	Lachnospiracea_incertae_sedis	Metabolite	Bacteria	GlutamateLachnospiracea_incertae_sedis	1	114	131	0,9347	5	0,2990	0,9958	0,0198	DUO	24hL
Xanthine	Lachnospiracea_incertae_sedis	Metabolite	Bacteria	XanthineLachnospiracea_incertae_sedis	5	114	131	0,8266	6	0,0457	0,9804	0,0425	RUM	+118
Acetate	Lachnospiracea_incertae_sedis	Metabolite	Bacteria	AcetateLachnospiracea_incertae_sedis	1	112	131	0,9645	7	0,7728	0,9949	0,0004	DUO	+100
3-Hydroxybutyrate	Lachnospiracea_incertae_sedis	Metabolite	Bacteria	3-HydroxybutyrateLachnospiracea_incertae_sedis	1	112	131	-0,9589	4	-0,9992	0,0279	0,0411	DUO	72hL
Glucose	Lachnospiracea_incertae_sedis	Metabolite	Bacteria	GlucoseLachnospiracea_incertae_sedis	4	110	131	0,9728	5	0,6388	0,9983	0,0054	DUO	24hL
Glucose	Lachnospiracea_incertae_sedis	Metabolite	Bacteria	GlucoseLachnospiracea_incertae_sedis	4	110	131	0,9864	4	0,4861	0,9997	0,0136	DUO	72hL
Glucose	Lachnospiracea_incertae_sedis	Metabolite	Bacteria	GlucoseLachnospiracea_incertae_sedis	4	110	131	0,8813	6	0,2450	0,9870	0,0203	RUM	+126
Ornithine	Lachnospiracea_incertae_sedis	Metabolite	Bacteria	OrnithineLachnospiracea_incertae_sedis	3	110	131	0,9232	5	0,2207	0,9950	0,0253	DUO	24hL
Ornithine	Lachnospiracea_incertae_sedis	Metabolite	Bacteria	OrnithineLachnospiracea_incertae_sedis	3	110	131	0,9141	5	0,1643	0,9944	0,0298	RUM	24hL
Ornithine	Lachnospiracea_incertae_sedis	Metabolite	Bacteria	OrnithineLachnospiracea_incertae_sedis	3	110	131	0,7821	7	0,0707	0,9661	0,0377	DUO	+100
Glucose	Lachnospiracea_incertae_sedis	Metabolite	Bacteria	GlucoseLachnospiracea_incertae_sedis	4	110	131	-0,8299	6	-0,9809	-0,0563	0,0409	DUO	+126
Isoleucine	Lachnospiracea_incertae_sedis	Metabolite	Bacteria	IsoleucineLachnospiracea_incertae_sedis	3	109	131	0,9937	5	0,9044	0,9996	0,0006	DUO	24hL
Isoleucine	Lachnospiracea_incertae_sedis	Metabolite	Bacteria	IsoleucineLachnospiracea_incertae_sedis	3	109	131	0,9720	5	0,6304	0,9982	0,0056	DUO	12hC
Isoleucine	Lachnospiracea_incertae_sedis	Metabolite	Bacteria	IsoleucineLachnospiracea_incertae_sedis	3	109	131	-0,8920	6	-0,9882	-0,2913	0,0169	DUO	+126
Propionate	Lachnospiracea_incertae_sedis	Metabolite	Bacteria	PropionateLachnospiracea_incertae_sedis	2	109	131	-0,8779	6	-0,9866	-0,2306	0,0215	DUO	+126
Propionate	Lachnospiracea_incertae_sedis	Metabolite	Bacteria	PropionateLachnospiracea_incertae_sedis	2	109	131	0,8604	6	0,1618	0,9845	0,0279	RUM	+126
Adipate	Lachnospiracea_incertae_sedis	Metabolite	Bacteria	AdipateLachnospiracea_incertae_sedis	2	109	131	-0,8586	6	-0,9843	-0,1552	0,0286	DUO	+126
Adipate	Lachnospiracea_incertae_sedis	Metabolite	Bacteria	AdipateLachnospiracea_incertae_sedis	2	109	131	0,9114	5	0,1489	0,9942	0,0312	DUO	24hL
Isobutyrate	Lachnospiracea_incertae_sedis	Metabolite	Bacteria	IsobutyrateLachnospiracea_incertae_sedis	4	103	131	-0,9027	6	-0,9894	-0,3411	0,0137	DUO	+126
Isobutyrate	Lachnospiracea_incertae_sedis	Metabolite	Bacteria	IsobutyrateLachnospiracea_incertae_sedis	4	103	131	0,9008	6	0,3317	0,9892	0,0143	RUM	72hL
Isobutyrate	Lachnospiracea_incertae_sedis	Metabolite	Bacteria	IsobutyrateLachnospiracea_incertae_sedis	4	103	131	0,8821	6	0,2484	0,9871	0,0200	RUM	24hC
Isobutyrate	Lachnospiracea_incertae_sedis	Metabolite	Bacteria	IsobutyrateLachnospiracea_incertae_sedis	4	103	131	0,9207	5	0,2048	0,9948	0,0265	RUM	+14
3-Hydroxyphenylacetate	Lachnospiracea_incertae_sedis	Metabolite	Bacteria	3-HydroxyphenylacetateLachnospiracea_incertae_sedis	2	101	131	0,9113	6	0,3831	0,9904	0,0114	RUM	+126
3-Hydroxyphenylacetate	Lachnospiracea_incertae_sedis	Metabolite	Bacteria	3-HydroxyphenylacetateLachnospiracea_incertae_sedis	2	101	131	0,8999	5	0,0855	0,9934	0,0374	DUO	24hL
Formate	Uncl. Erysipelotrichaceae	Metabolite	Bacteria	FormateUncl. Erysipelotrichaceae	2	178	127	0,9916	7	0,9417	0,9988	<,0001	DUO	12hL
Formate	Uncl. Erysipelotrichaceae	Metabolite	Bacteria	FormateUncl. Erysipelotrichaceae	2	178	127	-0,9423	5	-0,9963	-0,3558	0,0165	RUM	+100
Choline	Uncl. Erysipelotrichaceae	Metabolite	Bacteria	CholineUncl. Erysipelotrichaceae	3	173	127	0,9695	7	0,8022	0,9957	0,0003	DUO	12hL
Choline	Uncl. Erysipelotrichaceae	Metabolite	Bacteria	CholineUncl. Erysipelotrichaceae	3	173	127	0,8541	7	0,2831	0,9781	0,0144	RUM	-42
Choline	Uncl. Erysipelotrichaceae	Metabolite	Bacteria	CholineUncl. Erysipelotrichaceae	3	173	127	-0,8521	6	-0,9835	-0,1315	0,0312	RUM	72hC
Fumarate	Uncl. Erysipelotrichaceae	Metabolite	Bacteria	FumarateUncl. Erysipelotrichaceae	4	166	127	0,9702	7	0,8062	0,9958	0,0003	DUO	12hL
Fumarate	Uncl. Erysipelotrichaceae	Metabolite	Bacteria	FumarateUncl. Erysipelotrichaceae	4	166	127	0,9966	4	0,8426	0,9999	0,0034	DUO	72hL
Fumarate	Uncl. Erysipelotrichaceae	Metabolite	Bacteria	FumarateUncl. Erysipelotrichaceae	4	166	127	0,8271	7	0,1962	0,9737	0,0217	DUO	24hC
Fumarate	Uncl. Erysipelotrichaceae	Metabolite	Bacteria	FumarateUncl. Erysipelotrichaceae	4	166	127	-0,8887	5	-0,9927	-0,0299	0,0438	RUM	+100
Proline	Uncl. Erysipelotrichaceae	Metabolite	Bacteria	ProlineUncl. Erysipelotrichaceae	2	165	127	0,9920	7	0,9443	0,9989	<,0001	DUO	12hL
Proline	Uncl. Erysipelotrichaceae	Metabolite	Bacteria	ProlineUncl. Erysipelotrichaceae	2	165	127	0,8505	6	0,1256	0,9833	0,0319	RUM	-14
Aspartate	Uncl. Erysipelotrichaceae	Metabolite	Bacteria	AspartateUncl. Erysipelotrichaceae	2	159	127	0,9925	7	0,9483	0,9989	<,0001	DUO	12hL
Aspartate	Uncl. Erysipelotrichaceae	Metabolite	Bacteria	AspartateUncl. Erysipelotrichaceae	2	159	127	-0,9040	6	-0,9896	-0,3469	0,0134	RUM	72hC
Ribose	Uncl. Erysipelotrichaceae	Metabolite	Bacteria	RiboseUncl. Erysipelotrichaceae	3	158	127	0,9929	7	0,9505	0,9990	<,0001	DUO	12hL
Ribose	Uncl. Erysipelotrichaceae	Metabolite	Bacteria	RiboseUncl. Erysipelotrichaceae	3	158	127	0,9882	5	0,8263	0,9993	0,0015	RUM	24hL
Ribose	Uncl. Erysipelotrichaceae	Metabolite	Bacteria	RiboseUncl. Erysipelotrichaceae	3	158	127	0,8018	7	0,1231	0,9695	0,0301	RUM	-42
1,3-Dihydroxyacetone	Uncl. Erysipelotrichaceae	Metabolite	Bacteria	1,3-DihydroxyacetoneUncl. Erysipelotrichaceae	1	154	127	0,9816	7	0,8762	0,9974	<,0001	DUO	12hL
Isopropanol	Uncl. Erysipelotrichaceae	Metabolite	Bacteria	IsopropanolUncl. Erysipelotrichaceae	2	154	127	0,9946	7	0,9625	0,9992	<,0001	DUO	12hL
Isopropanol	Uncl. Erysipelotrichaceae	Metabolite	Bacteria	IsopropanolUncl. Erysipelotrichaceae	2	154	127	0,9144	5	0,1661	0,9944	0,0297	RUM	24hL
Lactate	Uncl. Erysipelotrichaceae	Metabolite	Bacteria	LactateUncl. Erysipelotrichaceae	3	153	127	0,9904	7	0,9339	0,9986	<,0001	DUO	12hL
[truncated: 5,806 more rows]

## Sheet: Most frequent repeats (≥5 rep.)
Supplementary Data 6
Most frequent repeats (≥ 5 repeats)
Sum+	Sum-		Ribose - Uncl. Succinivibrionaceae		Aspartate - Uncl. Succinivibrionaceae		1,3-Dihydroxyacetone - Uncl. Succinivibrionaceae		Methylamine - Uncl. Succinivibrionaceae		Proline - Uncl. Succinivibrionaceae		Serine - Uncl. Succinivibrionaceae		Succinate - Uncl. Succinivibrionaceae		3-Phenylpropionate - Uncl. Succinivibrionaceae		4-Hydroxybutyrate - Uncl. Succinivibrionaceae		Histidine - Uncl. Succinivibrionaceae		Caffeine - Uncl. Succinivibrionaceae		Imidazole - Uncl. Succinivibrionaceae		Lactate - Uncl. Succinivibrionaceae		Lysine - Uncl. Succinivibrionaceae		Methanol - Uncl. Succinivibrionaceae		Fumarate - SR1 genera i.s.		Ribose - SR1 genera i.s.		Aspartate - SR1 genera i.s.		Caffeine - SR1 genera i.s.		Ethanol - SR1 genera i.s.		Succinate - SR1 genera i.s.		Proline - SR1 genera i.s.		Serine - SR1 genera i.s.		Methylamine - SR1 genera i.s.
50	0	-42		+		+		+	+	+		+		+		+		+		+		+	+	+	+	+		+		+	+	+		+		+		+		+		+		+		+		+
12	2	-14
17	2	12hC		+				+								+		+				+														+								+
24	4	24hC		+				+				+								+			+																+
20	1	72hC											+																				+														+
21	0	+14	+		+						+				+												+								+		+						+		+
17	8	+100						+		-				-		-		-				-											+
44	2	12hL		+		+		+		+		+		+		+		+		+		+		+		+		+		+		+		+		+		+		+		+		+		+		+
30	3	24hL	+		+				+																		+		+						+		+				+								+
25	5	72hL			+												+		+							+	+		+					+	+		+		+		+				+		+		+
37	2	+118		+	+	+	+				+	+	+	+		+				+		+		+		+				+	+	+
36	4	+126							-																								+	+		+		+		+		+		+		+		+
			RUM	DUO	RUM	DUO	RUM	DUO	RUM	DUO	RUM	DUO	RUM	DUO	RUM	DUO	RUM	DUO	RUM	DUO	RUM	DUO	RUM	DUO	RUM	DUO	RUM	DUO	RUM	DUO	RUM	DUO	RUM	DUO	RUM	DUO	RUM	DUO	RUM	DUO	RUM	DUO	RUM	DUO	RUM	DUO	RUM	DUO	RUM
		Total repeats	7		7		6		6		6		6		6		5		5		5		5		5		5		5		5		7		7		6		5		5		5		5		5		5
[truncated: 91 more columns]

## Sheet: Dedublicate table
Supplementary Data 6
How to understand this table:
In this table all significant combinations between metabolite and genus were concatinated. Afterwards, all dublicate combinations were deleted.
The metabolites and genera were then counted across the complete list, in order to make a statement how broad the interactions of a metabolite or genus are.
E.g. Choline (metabolite) covered 86 out of 102 total genera and hence correlated with the respective genus at least once significantly throughout the complete trial phase.
E.g. Turicibacter (genus) correalted with 5 different metabolites across the complete trial phase, at least once.
Metabolite (Variable1)	Genus (Variable2)	Variable1	Variable2	Concatination	COUNT Metabolite	COUNT Bacterium
Choline	Bacteroides	Metabolite	Bacteria	CholineBacteroides	86	60
Choline	Unclassified Anaeroplasmataceae	Metabolite	Bacteria	CholineUnclassified Anaeroplasmataceae	86	59
Choline	Unclassified Actinomycetaceae	Metabolite	Bacteria	CholineUnclassified Actinomycetaceae	86	59
Choline	Fusobacterium	Metabolite	Bacteria	CholineFusobacterium	86	59
Choline	SR1_genera_incertae_sedis	Metabolite	Bacteria	CholineSR1_genera_incertae_sedis	86	59
Choline	Unclassified Succinivibrionaceae	Metabolite	Bacteria	CholineUnclassified Succinivibrionaceae	86	59
Choline	Megasphaera	Metabolite	Bacteria	CholineMegasphaera	86	59
Choline	Unclassified Erysipelotrichaceae	Metabolite	Bacteria	CholineUnclassified Erysipelotrichaceae	86	59
Choline	Pseudobutyrivibrio	Metabolite	Bacteria	CholinePseudobutyrivibrio	86	59
Choline	Unclassified Bacteria	Metabolite	Bacteria	CholineUnclassified Bacteria	86	59
Choline	Treponema	Metabolite	Bacteria	CholineTreponema	86	59
Choline	Porphyromonas	Metabolite	Bacteria	CholinePorphyromonas	86	58
Choline	Unclassified Neisseriaceae	Metabolite	Bacteria	CholineUnclassified Neisseriaceae	86	58
Choline	Unclassified Spirochaetales	Metabolite	Bacteria	CholineUnclassified Spirochaetales	86	58
Choline	Unclassified Subdivision5_genera_incertae_sedis	Metabolite	Bacteria	CholineUnclassified Subdivision5_genera_incertae_sedis	86	57
Choline	Ruminobacter	Metabolite	Bacteria	CholineRuminobacter	86	57
Choline	Asteroleplasma	Metabolite	Bacteria	CholineAsteroleplasma	86	57
Choline	Lachnospiracea_incertae_sedis	Metabolite	Bacteria	CholineLachnospiracea_incertae_sedis	86	57
Choline	Campylobacter	Metabolite	Bacteria	CholineCampylobacter	86	56
Choline	Saccharibacteria_genera_incertae_sedis	Metabolite	Bacteria	CholineSaccharibacteria_genera_incertae_sedis	86	56
Choline	Unclassified Spirochaetia	Metabolite	Bacteria	CholineUnclassified Spirochaetia	86	56
Choline	Unclassified Mollicutes	Metabolite	Bacteria	CholineUnclassified Mollicutes	86	56
Choline	Eisenbergiella	Metabolite	Bacteria	CholineEisenbergiella	86	56
Choline	Olsenella	Metabolite	Bacteria	CholineOlsenella	86	56
Choline	Unclassified Bifidobacteriaceae	Metabolite	Bacteria	CholineUnclassified Bifidobacteriaceae	86	55
Choline	Unclassified Alphaproteobacteria	Metabolite	Bacteria	CholineUnclassified Alphaproteobacteria	86	54
Choline	Unclassified Clostridiaceae 1	Metabolite	Bacteria	CholineUnclassified Clostridiaceae 1	86	54
Choline	Dialister	Metabolite	Bacteria	CholineDialister	86	54
Choline	Streptococcus	Metabolite	Bacteria	CholineStreptococcus	86	54
Choline	Unclassified Lachnospiraceae	Metabolite	Bacteria	CholineUnclassified Lachnospiraceae	86	54
Choline	Unclassified Burkholderiales	Metabolite	Bacteria	CholineUnclassified Burkholderiales	86	53
Choline	Roseburia	Metabolite	Bacteria	CholineRoseburia	86	53
Choline	Succiniclasticum	Metabolite	Bacteria	CholineSucciniclasticum	86	51
Choline	Anaerovibrio	Metabolite	Bacteria	CholineAnaerovibrio	86	51
Choline	Sharpea	Metabolite	Bacteria	CholineSharpea	86	50
Choline	Unclassified Acidaminococcaceae	Metabolite	Bacteria	CholineUnclassified Acidaminococcaceae	86	50
Choline	Fibrobacter	Metabolite	Bacteria	CholineFibrobacter	86	50
Choline	Catenisphaera	Metabolite	Bacteria	CholineCatenisphaera	86	50
Choline	Acidaminococcus	Metabolite	Bacteria	CholineAcidaminococcus	86	49
Choline	Denitrobacterium	Metabolite	Bacteria	CholineDenitrobacterium	86	48
Choline	Lactobacillus	Metabolite	Bacteria	CholineLactobacillus	86	48
Choline	Pseudoscardovia	Metabolite	Bacteria	CholinePseudoscardovia	86	48
Choline	Unclassified Coriobacteriaceae	Metabolite	Bacteria	CholineUnclassified Coriobacteriaceae	86	48
Choline	Unclassified Bacteroidia	Metabolite	Bacteria	CholineUnclassified Bacteroidia	86	47
Choline	Unclassified Gammaproteobacteria	Metabolite	Bacteria	CholineUnclassified Gammaproteobacteria	86	47
Choline	Unclassified Betaproteobacteria	Metabolite	Bacteria	CholineUnclassified Betaproteobacteria	86	47
Choline	Bifidobacterium	Metabolite	Bacteria	CholineBifidobacterium	86	46
Choline	Schwartzia	Metabolite	Bacteria	CholineSchwartzia	86	46
Choline	Unclassified SR1_genera_incertae_sedis	Metabolite	Bacteria	CholineUnclassified SR1_genera_incertae_sedis	86	46
Choline	Unclassified Prevotellaceae	Metabolite	Bacteria	CholineUnclassified Prevotellaceae	86	46
Choline	Unclassified Ruminococcaceae	Metabolite	Bacteria	CholineUnclassified Ruminococcaceae	86	46
Choline	Unclassified Clostridiales_Incertae Sedis XIII	Metabolite	Bacteria	CholineUnclassified Clostridiales_Incertae Sedis XIII	86	45
Choline	Unclassified Streptococcaceae	Metabolite	Bacteria	CholineUnclassified Streptococcaceae	86	45
Choline	Anaeroplasma	Metabolite	Bacteria	CholineAnaeroplasma	86	44
Choline	Butyrivibrio	Metabolite	Bacteria	CholineButyrivibrio	86	44
Choline	Unclassified Selenomonadales	Metabolite	Bacteria	CholineUnclassified Selenomonadales	86	44
Choline	Unclassified Bacteroidales	Metabolite	Bacteria	CholineUnclassified Bacteroidales	86	41
Choline	Prevotella	Metabolite	Bacteria	CholinePrevotella	86	41
Choline	Selenomonas	Metabolite	Bacteria	CholineSelenomonas	86	40
Choline	Allisonella	Metabolite	Bacteria	CholineAllisonella	86	40
Choline	Unclassified Bacteroidetes	Metabolite	Bacteria	CholineUnclassified Bacteroidetes	86	39
Choline	Unclassified Clostridia	Metabolite	Bacteria	CholineUnclassified Clostridia	86	38
Choline	Clostridium sensu stricto	Metabolite	Bacteria	CholineClostridium sensu stricto	86	38
Choline	Succinivibrio	Metabolite	Bacteria	CholineSuccinivibrio	86	38
Choline	Unclassified Firmicutes	Metabolite	Bacteria	CholineUnclassified Firmicutes	86	38
Choline	Unclassified Clostridiales	Metabolite	Bacteria	CholineUnclassified Clostridiales	86	36
Choline	Unclassified Porphyromonadaceae	Metabolite	Bacteria	CholineUnclassified Porphyromonadaceae	86	35
Choline	Unclassified Saccharibacteria_genera_incertae_sedis	Metabolite	Bacteria	CholineUnclassified Saccharibacteria_genera_incertae_sedis	86	35
Choline	Unclassified Deltaproteobacteria	Metabolite	Bacteria	CholineUnclassified Deltaproteobacteria	86	35
Choline	Unclassified Marinilabiliaceae	Metabolite	Bacteria	CholineUnclassified Marinilabiliaceae	86	33
Choline	Unclassified Erysipelotrichales	Metabolite	Bacteria	CholineUnclassified Erysipelotrichales	86	33
Choline	Unclassified Anaeroplasmatales	Metabolite	Bacteria	CholineUnclassified Anaeroplasmatales	86	33
Choline	Unclassified Lentisphaerae	Metabolite	Bacteria	CholineUnclassified Lentisphaerae	86	31
Choline	Unclassified Peptostreptococcaceae	Metabolite	Bacteria	CholineUnclassified Peptostreptococcaceae	86	30
Choline	Anaerovorax	Metabolite	Bacteria	CholineAnaerovorax	86	30
Choline	Ruminococcus	Metabolite	Bacteria	CholineRuminococcus	86	28
Choline	Succinimonas	Metabolite	Bacteria	CholineSuccinimonas	86	26
Choline	Unclassified Synergistaceae	Metabolite	Bacteria	CholineUnclassified Synergistaceae	86	23
Choline	Peptostreptococcus	Metabolite	Bacteria	CholinePeptostreptococcus	86	22
Choline	Anaerofustis	Metabolite	Bacteria	CholineAnaerofustis	86	20
Choline	Unclassified Enterobacteriaceae	Metabolite	Bacteria	CholineUnclassified Enterobacteriaceae	86	19
Choline	Lampropedia	Metabolite	Bacteria	CholineLampropedia	86	18
Choline	Unclassified Clostridiales_Incertae Sedis XI	Metabolite	Bacteria	CholineUnclassified Clostridiales_Incertae Sedis XI	86	17
Choline	Enterococcus	Metabolite	Bacteria	CholineEnterococcus	86	15
Choline	Romboutsia	Metabolite	Bacteria	CholineRomboutsia	86	15
Choline	Weissella	Metabolite	Bacteria	CholineWeissella	86	11
Formate	Bacteroides	Metabolite	Bacteria	FormateBacteroides	84	60
Formate	Unclassified Anaeroplasmataceae	Metabolite	Bacteria	FormateUnclassified Anaeroplasmataceae	84	59
Formate	Unclassified Actinomycetaceae	Metabolite	Bacteria	FormateUnclassified Actinomycetaceae	84	59
Formate	Fusobacterium	Metabolite	Bacteria	FormateFusobacterium	84	59
Formate	SR1_genera_incertae_sedis	Metabolite	Bacteria	FormateSR1_genera_incertae_sedis	84	59
Formate	Unclassified Succinivibrionaceae	Metabolite	Bacteria	FormateUnclassified Succinivibrionaceae	84	59
Formate	Megasphaera	Metabolite	Bacteria	FormateMegasphaera	84	59
Formate	Pseudobutyrivibrio	Metabolite	Bacteria	FormatePseudobutyrivibrio	84	59
Formate	Unclassified Erysipelotrichaceae	Metabolite	Bacteria	FormateUnclassified Erysipelotrichaceae	84	59
Formate	Unclassified Bacteria	Metabolite	Bacteria	FormateUnclassified Bacteria	84	59
Formate	Treponema	Metabolite	Bacteria	FormateTreponema	84	59
Formate	Porphyromonas	Metabolite	Bacteria	FormatePorphyromonas	84	58
Formate	Unclassified Spirochaetales	Metabolite	Bacteria	FormateUnclassified Spirochaetales	84	58
Formate	Unclassified Neisseriaceae	Metabolite	Bacteria	FormateUnclassified Neisseriaceae	84	58
Formate	Unclassified Subdivision5_genera_incertae_sedis	Metabolite	Bacteria	FormateUnclassified Subdivision5_genera_incertae_sedis	84	57
Formate	Ruminobacter	Metabolite	Bacteria	FormateRuminobacter	84	57
Formate	Lachnospiracea_incertae_sedis	Metabolite	Bacteria	FormateLachnospiracea_incertae_sedis	84	57
Formate	Asteroleplasma	Metabolite	Bacteria	FormateAsteroleplasma	84	57
Formate	Campylobacter	Metabolite	Bacteria	FormateCampylobacter	84	56
Formate	Saccharibacteria_genera_incertae_sedis	Metabolite	Bacteria	FormateSaccharibacteria_genera_incertae_sedis	84	56
Formate	Unclassified Spirochaetia	Metabolite	Bacteria	FormateUnclassified Spirochaetia	84	56
Formate	Eisenbergiella	Metabolite	Bacteria	FormateEisenbergiella	84	56
Formate	Unclassified Mollicutes	Metabolite	Bacteria	FormateUnclassified Mollicutes	84	56
Formate	Olsenella	Metabolite	Bacteria	FormateOlsenella	84	56
Formate	Unclassified Bifidobacteriaceae	Metabolite	Bacteria	FormateUnclassified Bifidobacteriaceae	84	55
Formate	Dialister	Metabolite	Bacteria	FormateDialister	84	54
Formate	Streptococcus	Metabolite	Bacteria	FormateStreptococcus	84	54
Formate	Unclassified Clostridiaceae 1	Metabolite	Bacteria	FormateUnclassified Clostridiaceae 1	84	54
Formate	Unclassified Alphaproteobacteria	Metabolite	Bacteria	FormateUnclassified Alphaproteobacteria	84	54
Formate	Unclassified Lachnospiraceae	Metabolite	Bacteria	FormateUnclassified Lachnospiraceae	84	54
Formate	Roseburia	Metabolite	Bacteria	FormateRoseburia	84	53
Formate	Unclassified Burkholderiales	Metabolite	Bacteria	FormateUnclassified Burkholderiales	84	53
Formate	Anaerovibrio	Metabolite	Bacteria	FormateAnaerovibrio	84	51
Formate	Succiniclasticum	Metabolite	Bacteria	FormateSucciniclasticum	84	51
Formate	Unclassified Acidaminococcaceae	Metabolite	Bacteria	FormateUnclassified Acidaminococcaceae	84	50
Formate	Sharpea	Metabolite	Bacteria	FormateSharpea	84	50
Formate	Unclassified Desulfobulbaceae	Metabolite	Bacteria	FormateUnclassified Desulfobulbaceae	84	50
Formate	Fibrobacter	Metabolite	Bacteria	FormateFibrobacter	84	50
Formate	Acidaminococcus	Metabolite	Bacteria	FormateAcidaminococcus	84	49
Formate	Unclassified Spirochaetaceae	Metabolite	Bacteria	FormateUnclassified Spirochaetaceae	84	49
Formate	Lactobacillus	Metabolite	Bacteria	FormateLactobacillus	84	48
Formate	Pseudoscardovia	Metabolite	Bacteria	FormatePseudoscardovia	84	48
Formate	Unclassified Coriobacteriaceae	Metabolite	Bacteria	FormateUnclassified Coriobacteriaceae	84	48
Formate	Denitrobacterium	Metabolite	Bacteria	FormateDenitrobacterium	84	48
Formate	Unclassified Betaproteobacteria	Metabolite	Bacteria	FormateUnclassified Betaproteobacteria	84	47
Formate	Unclassified Gammaproteobacteria	Metabolite	Bacteria	FormateUnclassified Gammaproteobacteria	84	47
Formate	Unclassified Bacteroidia	Metabolite	Bacteria	FormateUnclassified Bacteroidia	84	47
Formate	Corynebacterium	Metabolite	Bacteria	FormateCorynebacterium	84	47
Formate	Schwartzia	Metabolite	Bacteria	FormateSchwartzia	84	46
Formate	Unclassified SR1_genera_incertae_sedis	Metabolite	Bacteria	FormateUnclassified SR1_genera_incertae_sedis	84	46
Formate	Unclassified Ruminococcaceae	Metabolite	Bacteria	FormateUnclassified Ruminococcaceae	84	46
Formate	Unclassified Streptococcaceae	Metabolite	Bacteria	FormateUnclassified Streptococcaceae	84	45
Formate	Unclassified Clostridiales_Incertae Sedis XIII	Metabolite	Bacteria	FormateUnclassified Clostridiales_Incertae Sedis XIII	84	45
Formate	Unclassified Selenomonadales	Metabolite	Bacteria	FormateUnclassified Selenomonadales	84	44
Formate	Anaeroplasma	Metabolite	Bacteria	FormateAnaeroplasma	84	44
Formate	Butyrivibrio	Metabolite	Bacteria	FormateButyrivibrio	84	44
Formate	Syntrophococcus	Metabolite	Bacteria	FormateSyntrophococcus	84	44
Formate	Unclassified Bacteroidales	Metabolite	Bacteria	FormateUnclassified Bacteroidales	84	41
Formate	Prevotella	Metabolite	Bacteria	FormatePrevotella	84	41
Formate	Selenomonas	Metabolite	Bacteria	FormateSelenomonas	84	40
Formate	Allisonella	Metabolite	Bacteria	FormateAllisonella	84	40
Formate	Unclassified Bacteroidetes	Metabolite	Bacteria	FormateUnclassified Bacteroidetes	84	39
Formate	Unclassified Clostridia	Metabolite	Bacteria	FormateUnclassified Clostridia	84	38
Formate	Clostridium sensu stricto	Metabolite	Bacteria	FormateClostridium sensu stricto	84	38
Formate	Unclassified Firmicutes	Metabolite	Bacteria	FormateUnclassified Firmicutes	84	38
Formate	Unclassified Clostridiales	Metabolite	Bacteria	FormateUnclassified Clostridiales	84	36
Formate	Unclassified Deltaproteobacteria	Metabolite	Bacteria	FormateUnclassified Deltaproteobacteria	84	35
Formate	Unclassified Saccharibacteria_genera_incertae_sedis	Metabolite	Bacteria	FormateUnclassified Saccharibacteria_genera_incertae_sedis	84	35
Formate	Unclassified Veillonellaceae	Metabolite	Bacteria	FormateUnclassified Veillonellaceae	84	35
Formate	Unclassified Anaeroplasmatales	Metabolite	Bacteria	FormateUnclassified Anaeroplasmatales	84	33
Formate	Unclassified Lentisphaerae	Metabolite	Bacteria	FormateUnclassified Lentisphaerae	84	31
Formate	Unclassified Proteobacteria	Metabolite	Bacteria	FormateUnclassified Proteobacteria	84	31
Formate	Unclassified Peptostreptococcaceae	Metabolite	Bacteria	FormateUnclassified Peptostreptococcaceae	84	30
Formate	Anaerovorax	Metabolite	Bacteria	FormateAnaerovorax	84	30
Formate	Succinimonas	Metabolite	Bacteria	FormateSuccinimonas	84	26
Formate	Peptostreptococcus	Metabolite	Bacteria	FormatePeptostreptococcus	84	22
Formate	Anaerofustis	Metabolite	Bacteria	FormateAnaerofustis	84	20
Formate	Unclassified Enterobacteriaceae	Metabolite	Bacteria	FormateUnclassified Enterobacteriaceae	84	19
Formate	Lampropedia	Metabolite	Bacteria	FormateLampropedia	84	18
Formate	Unclassified Clostridiales_Incertae Sedis XI	Metabolite	Bacteria	FormateUnclassified Clostridiales_Incertae Sedis XI	84	17
Formate	Unclassified Eubacteriaceae	Metabolite	Bacteria	FormateUnclassified Eubacteriaceae	84	17
Formate	Enterococcus	Metabolite	Bacteria	FormateEnterococcus	84	15
Formate	Romboutsia	Metabolite	Bacteria	FormateRomboutsia	84	15
Formate	Weissella	Metabolite	Bacteria	FormateWeissella	84	11
Proline	Bacteroides	Metabolite	Bacteria	ProlineBacteroides	81	60
Proline	Unclassified Anaeroplasmataceae	Metabolite	Bacteria	ProlineUnclassified Anaeroplasmataceae	81	59
Proline	Unclassified Actinomycetaceae	Metabolite	Bacteria	ProlineUnclassified Actinomycetaceae	81	59
Proline	Fusobacterium	Metabolite	Bacteria	ProlineFusobacterium	81	59
Proline	SR1_genera_incertae_sedis	Metabolite	Bacteria	ProlineSR1_genera_incertae_sedis	81	59
Proline	Unclassified Succinivibrionaceae	Metabolite	Bacteria	ProlineUnclassified Succinivibrionaceae	81	59
Proline	Megasphaera	Metabolite	Bacteria	ProlineMegasphaera	81	59
Proline	Pseudobutyrivibrio	Metabolite	Bacteria	ProlinePseudobutyrivibrio	81	59
Proline	Unclassified Erysipelotrichaceae	Metabolite	Bacteria	ProlineUnclassified Erysipelotrichaceae	81	59
Proline	Unclassified Bacteria	Metabolite	Bacteria	ProlineUnclassified Bacteria	81	59
Proline	Treponema	Metabolite	Bacteria	ProlineTreponema	81	59
Proline	Porphyromonas	Metabolite	Bacteria	ProlinePorphyromonas	81	58
Proline	Unclassified Neisseriaceae	Metabolite	Bacteria	ProlineUnclassified Neisseriaceae	81	58
Proline	Unclassified Spirochaetales	Metabolite	Bacteria	ProlineUnclassified Spirochaetales	81	58
Proline	Unclassified Subdivision5_genera_incertae_sedis	Metabolite	Bacteria	ProlineUnclassified Subdivision5_genera_incertae_sedis	81	57
Proline	Asteroleplasma	Metabolite	Bacteria	ProlineAsteroleplasma	81	57
Proline	Ruminobacter	Metabolite	Bacteria	ProlineRuminobacter	81	57
Proline	Lachnospiracea_incertae_sedis	Metabolite	Bacteria	ProlineLachnospiracea_incertae_sedis	81	57
Proline	Campylobacter	Metabolite	Bacteria	ProlineCampylobacter	81	56
Proline	Unclassified Spirochaetia	Metabolite	Bacteria	ProlineUnclassified Spirochaetia	81	56
Proline	Unclassified Mollicutes	Metabolite	Bacteria	ProlineUnclassified Mollicutes	81	56
Proline	Saccharibacteria_genera_incertae_sedis	Metabolite	Bacteria	ProlineSaccharibacteria_genera_incertae_sedis	81	56
Proline	Eisenbergiella	Metabolite	Bacteria	ProlineEisenbergiella	81	56
Proline	Olsenella	Metabolite	Bacteria	ProlineOlsenella	81	56
Proline	Unclassified Bifidobacteriaceae	Metabolite	Bacteria	ProlineUnclassified Bifidobacteriaceae	81	55
Proline	Unclassified Alphaproteobacteria	Metabolite	Bacteria	ProlineUnclassified Alphaproteobacteria	81	54
Proline	Dialister	Metabolite	Bacteria	ProlineDialister	81	54
Proline	Unclassified Clostridiaceae 1	Metabolite	Bacteria	ProlineUnclassified Clostridiaceae 1	81	54
Proline	Streptococcus	Metabolite	Bacteria	ProlineStreptococcus	81	54
Proline	Unclassified Lachnospiraceae	Metabolite	Bacteria	ProlineUnclassified Lachnospiraceae	81	54
Proline	Unclassified Burkholderiales	Metabolite	Bacteria	ProlineUnclassified Burkholderiales	81	53
Proline	Roseburia	Metabolite	Bacteria	ProlineRoseburia	81	53
Proline	Anaerovibrio	Metabolite	Bacteria	ProlineAnaerovibrio	81	51
Proline	Succiniclasticum	Metabolite	Bacteria	ProlineSucciniclasticum	81	51
Proline	Unclassified Acidaminococcaceae	Metabolite	Bacteria	ProlineUnclassified Acidaminococcaceae	81	50
Proline	Fibrobacter	Metabolite	Bacteria	ProlineFibrobacter	81	50
Proline	Catenisphaera	Metabolite	Bacteria	ProlineCatenisphaera	81	50
Proline	Sharpea	Metabolite	Bacteria	ProlineSharpea	81	50
Proline	Unclassified Desulfobulbaceae	Metabolite	Bacteria	ProlineUnclassified Desulfobulbaceae	81	50
Proline	Unclassified Spirochaetaceae	Metabolite	Bacteria	ProlineUnclassified Spirochaetaceae	81	49
Proline	Acidaminococcus	Metabolite	Bacteria	ProlineAcidaminococcus	81	49
Proline	Denitrobacterium	Metabolite	Bacteria	ProlineDenitrobacterium	81	48
Proline	Pseudoscardovia	Metabolite	Bacteria	ProlinePseudoscardovia	81	48
Proline	Unclassified Coriobacteriaceae	Metabolite	Bacteria	ProlineUnclassified Coriobacteriaceae	81	48
Proline	Lactobacillus	Metabolite	Bacteria	ProlineLactobacillus	81	48
Proline	Unclassified Gammaproteobacteria	Metabolite	Bacteria	ProlineUnclassified Gammaproteobacteria	81	47
Proline	Unclassified Betaproteobacteria	Metabolite	Bacteria	ProlineUnclassified Betaproteobacteria	81	47
Proline	Corynebacterium	Metabolite	Bacteria	ProlineCorynebacterium	81	47
Proline	Unclassified Bacteroidia	Metabolite	Bacteria	ProlineUnclassified Bacteroidia	81	47
Proline	Schwartzia	Metabolite	Bacteria	ProlineSchwartzia	81	46
Proline	Unclassified Prevotellaceae	Metabolite	Bacteria	ProlineUnclassified Prevotellaceae	81	46
Proline	Unclassified SR1_genera_incertae_sedis	Metabolite	Bacteria	ProlineUnclassified SR1_genera_incertae_sedis	81	46
Proline	Unclassified Ruminococcaceae	Metabolite	Bacteria	ProlineUnclassified Ruminococcaceae	81	46
Proline	Unclassified Streptococcaceae	Metabolite	Bacteria	ProlineUnclassified Streptococcaceae	81	45
Proline	Unclassified Selenomonadales	Metabolite	Bacteria	ProlineUnclassified Selenomonadales	81	44
Proline	Anaeroplasma	Metabolite	Bacteria	ProlineAnaeroplasma	81	44
Proline	Butyrivibrio	Metabolite	Bacteria	ProlineButyrivibrio	81	44
Proline	Prevotella	Metabolite	Bacteria	ProlinePrevotella	81	41
Proline	Unclassified Bacteroidales	Metabolite	Bacteria	ProlineUnclassified Bacteroidales	81	41
Proline	Selenomonas	Metabolite	Bacteria	ProlineSelenomonas	81	40
Proline	Unclassified Bacteroidetes	Metabolite	Bacteria	ProlineUnclassified Bacteroidetes	81	39
Proline	Unclassified Clostridia	Metabolite	Bacteria	ProlineUnclassified Clostridia	81	38
Proline	Clostridium sensu stricto	Metabolite	Bacteria	ProlineClostridium sensu stricto	81	38
Proline	Unclassified Clostridiales	Metabolite	Bacteria	ProlineUnclassified Clostridiales	81	36
Proline	Unclassified Porphyromonadaceae	Metabolite	Bacteria	ProlineUnclassified Porphyromonadaceae	81	35
Proline	Unclassified Deltaproteobacteria	Metabolite	Bacteria	ProlineUnclassified Deltaproteobacteria	81	35
Proline	Unclassified Saccharibacteria_genera_incertae_sedis	Metabolite	Bacteria	ProlineUnclassified Saccharibacteria_genera_incertae_sedis	81	35
Proline	Unclassified Marinilabiliaceae	Metabolite	Bacteria	ProlineUnclassified Marinilabiliaceae	81	33
Proline	Unclassified Anaeroplasmatales	Metabolite	Bacteria	ProlineUnclassified Anaeroplasmatales	81	33
Proline	Unclassified Erysipelotrichales	Metabolite	Bacteria	ProlineUnclassified Erysipelotrichales	81	33
Proline	Unclassified Lentisphaerae	Metabolite	Bacteria	ProlineUnclassified Lentisphaerae	81	31
Proline	Unclassified Proteobacteria	Metabolite	Bacteria	ProlineUnclassified Proteobacteria	81	31
Proline	Anaerovorax	Metabolite	Bacteria	ProlineAnaerovorax	81	30
Proline	Unclassified Elusimicrobia	Metabolite	Bacteria	ProlineUnclassified Elusimicrobia	81	30
Proline	Ruminococcus	Metabolite	Bacteria	ProlineRuminococcus	81	28
Proline	Succinimonas	Metabolite	Bacteria	ProlineSuccinimonas	81	26
Proline	Unclassified Acetobacteraceae	Metabolite	Bacteria	ProlineUnclassified Acetobacteraceae	81	25
Proline	Anaerofustis	Metabolite	Bacteria	ProlineAnaerofustis	81	20
Proline	Lampropedia	Metabolite	Bacteria	ProlineLampropedia	81	18
Proline	Unclassified Clostridiales_Incertae Sedis XI	Metabolite	Bacteria	ProlineUnclassified Clostridiales_Incertae Sedis XI	81	17
Proline	Bavariicoccus	Metabolite	Bacteria	ProlineBavariicoccus	81	13
Phenylacetate	Bacteroides	Metabolite	Bacteria	PhenylacetateBacteroides	79	60
Phenylacetate	Unclassified Anaeroplasmataceae	Metabolite	Bacteria	PhenylacetateUnclassified Anaeroplasmataceae	79	59
Phenylacetate	Unclassified Actinomycetaceae	Metabolite	Bacteria	PhenylacetateUnclassified Actinomycetaceae	79	59
Phenylacetate	Fusobacterium	Metabolite	Bacteria	PhenylacetateFusobacterium	79	59
Phenylacetate	SR1_genera_incertae_sedis	Metabolite	Bacteria	PhenylacetateSR1_genera_incertae_sedis	79	59
Phenylacetate	Unclassified Succinivibrionaceae	Metabolite	Bacteria	PhenylacetateUnclassified Succinivibrionaceae	79	59
Phenylacetate	Megasphaera	Metabolite	Bacteria	PhenylacetateMegasphaera	79	59
Phenylacetate	Pseudobutyrivibrio	Metabolite	Bacteria	PhenylacetatePseudobutyrivibrio	79	59
Phenylacetate	Unclassified Erysipelotrichaceae	Metabolite	Bacteria	PhenylacetateUnclassified Erysipelotrichaceae	79	59
Phenylacetate	Unclassified Bacteria	Metabolite	Bacteria	PhenylacetateUnclassified Bacteria	79	59
Phenylacetate	Treponema	Metabolite	Bacteria	PhenylacetateTreponema	79	59
Phenylacetate	Porphyromonas	Metabolite	Bacteria	PhenylacetatePorphyromonas	79	58
Phenylacetate	Unclassified Neisseriaceae	Metabolite	Bacteria	PhenylacetateUnclassified Neisseriaceae	79	58
Phenylacetate	Unclassified Spirochaetales	Metabolite	Bacteria	PhenylacetateUnclassified Spirochaetales	79	58
Phenylacetate	Unclassified Subdivision5_genera_incertae_sedis	Metabolite	Bacteria	PhenylacetateUnclassified Subdivision5_genera_incertae_sedis	79	57
Phenylacetate	Lachnospiracea_incertae_sedis	Metabolite	Bacteria	PhenylacetateLachnospiracea_incertae_sedis	79	57
Phenylacetate	Asteroleplasma	Metabolite	Bacteria	PhenylacetateAsteroleplasma	79	57
Phenylacetate	Ruminobacter	Metabolite	Bacteria	PhenylacetateRuminobacter	79	57
Phenylacetate	Campylobacter	Metabolite	Bacteria	PhenylacetateCampylobacter	79	56
Phenylacetate	Saccharibacteria_genera_incertae_sedis	Metabolite	Bacteria	PhenylacetateSaccharibacteria_genera_incertae_sedis	79	56
Phenylacetate	Unclassified Spirochaetia	Metabolite	Bacteria	PhenylacetateUnclassified Spirochaetia	79	56
Phenylacetate	Unclassified Mollicutes	Metabolite	Bacteria	PhenylacetateUnclassified Mollicutes	79	56
Phenylacetate	Eisenbergiella	Metabolite	Bacteria	PhenylacetateEisenbergiella	79	56
Phenylacetate	Olsenella	Metabolite	Bacteria	PhenylacetateOlsenella	79	56
Phenylacetate	Unclassified Bifidobacteriaceae	Metabolite	Bacteria	PhenylacetateUnclassified Bifidobacteriaceae	79	55
Phenylacetate	Streptococcus	Metabolite	Bacteria	PhenylacetateStreptococcus	79	54
Phenylacetate	Dialister	Metabolite	Bacteria	PhenylacetateDialister	79	54
Phenylacetate	Unclassified Clostridiaceae 1	Metabolite	Bacteria	PhenylacetateUnclassified Clostridiaceae 1	79	54
Phenylacetate	Unclassified Alphaproteobacteria	Metabolite	Bacteria	PhenylacetateUnclassified Alphaproteobacteria	79	54
Phenylacetate	Unclassified Lachnospiraceae	Metabolite	Bacteria	PhenylacetateUnclassified Lachnospiraceae	79	54
Phenylacetate	Roseburia	Metabolite	Bacteria	PhenylacetateRoseburia	79	53
Phenylacetate	Unclassified Burkholderiales	Metabolite	Bacteria	PhenylacetateUnclassified Burkholderiales	79	53
Phenylacetate	Anaerovibrio	Metabolite	Bacteria	PhenylacetateAnaerovibrio	79	51
Phenylacetate	Succiniclasticum	Metabolite	Bacteria	PhenylacetateSucciniclasticum	79	51
Phenylacetate	Unclassified Acidaminococcaceae	Metabolite	Bacteria	PhenylacetateUnclassified Acidaminococcaceae	79	50
Phenylacetate	Sharpea	Metabolite	Bacteria	PhenylacetateSharpea	79	50
Phenylacetate	Unclassified Spirochaetaceae	Metabolite	Bacteria	PhenylacetateUnclassified Spirochaetaceae	79	49
Phenylacetate	Acidaminococcus	Metabolite	Bacteria	PhenylacetateAcidaminococcus	79	49
Phenylacetate	Lactobacillus	Metabolite	Bacteria	PhenylacetateLactobacillus	79	48
Phenylacetate	Denitrobacterium	Metabolite	Bacteria	PhenylacetateDenitrobacterium	79	48
Phenylacetate	Unclassified Coriobacteriaceae	Metabolite	Bacteria	PhenylacetateUnclassified Coriobacteriaceae	79	48
Phenylacetate	Pseudoscardovia	Metabolite	Bacteria	PhenylacetatePseudoscardovia	79	48
Phenylacetate	Corynebacterium	Metabolite	Bacteria	PhenylacetateCorynebacterium	79	47
Phenylacetate	Unclassified Betaproteobacteria	Metabolite	Bacteria	PhenylacetateUnclassified Betaproteobacteria	79	47
Phenylacetate	Unclassified Gammaproteobacteria	Metabolite	Bacteria	PhenylacetateUnclassified Gammaproteobacteria	79	47
Phenylacetate	Unclassified Bacteroidia	Metabolite	Bacteria	PhenylacetateUnclassified Bacteroidia	79	47
Phenylacetate	Schwartzia	Metabolite	Bacteria	PhenylacetateSchwartzia	79	46
Phenylacetate	Bifidobacterium	Metabolite	Bacteria	PhenylacetateBifidobacterium	79	46
Phenylacetate	Unclassified SR1_genera_incertae_sedis	Metabolite	Bacteria	PhenylacetateUnclassified SR1_genera_incertae_sedis	79	46
Phenylacetate	Unclassified Streptococcaceae	Metabolite	Bacteria	PhenylacetateUnclassified Streptococcaceae	79	45
Phenylacetate	Syntrophococcus	Metabolite	Bacteria	PhenylacetateSyntrophococcus	79	44
Phenylacetate	Unclassified Selenomonadales	Metabolite	Bacteria	PhenylacetateUnclassified Selenomonadales	79	44
Phenylacetate	Butyrivibrio	Metabolite	Bacteria	PhenylacetateButyrivibrio	79	44
Phenylacetate	Anaeroplasma	Metabolite	Bacteria	PhenylacetateAnaeroplasma	79	44
Phenylacetate	Unclassified Bacteroidales	Metabolite	Bacteria	PhenylacetateUnclassified Bacteroidales	79	41
Phenylacetate	Allisonella	Metabolite	Bacteria	PhenylacetateAllisonella	79	40
Phenylacetate	Selenomonas	Metabolite	Bacteria	PhenylacetateSelenomonas	79	40
Phenylacetate	Succinivibrio	Metabolite	Bacteria	PhenylacetateSuccinivibrio	79	38
Phenylacetate	Unclassified Firmicutes	Metabolite	Bacteria	PhenylacetateUnclassified Firmicutes	79	38
Phenylacetate	Clostridium sensu stricto	Metabolite	Bacteria	PhenylacetateClostridium sensu stricto	79	38
Phenylacetate	Unclassified Actinobacteria	Metabolite	Bacteria	PhenylacetateUnclassified Actinobacteria	79	38
Phenylacetate	Unclassified Clostridia	Metabolite	Bacteria	PhenylacetateUnclassified Clostridia	79	38
Phenylacetate	Unclassified Saccharibacteria_genera_incertae_sedis	Metabolite	Bacteria	PhenylacetateUnclassified Saccharibacteria_genera_incertae_sedis	79	35
Phenylacetate	Unclassified Veillonellaceae	Metabolite	Bacteria	PhenylacetateUnclassified Veillonellaceae	79	35
Phenylacetate	Unclassified Marinilabiliaceae	Metabolite	Bacteria	PhenylacetateUnclassified Marinilabiliaceae	79	33
Phenylacetate	Unclassified Anaeroplasmatales	Metabolite	Bacteria	PhenylacetateUnclassified Anaeroplasmatales	79	33
Phenylacetate	Unclassified Erysipelotrichales	Metabolite	Bacteria	PhenylacetateUnclassified Erysipelotrichales	79	33
Phenylacetate	Unclassified Lentisphaerae	Metabolite	Bacteria	PhenylacetateUnclassified Lentisphaerae	79	31
Phenylacetate	Unclassified Proteobacteria	Metabolite	Bacteria	PhenylacetateUnclassified Proteobacteria	79	31
Phenylacetate	Unclassified Peptostreptococcaceae	Metabolite	Bacteria	PhenylacetateUnclassified Peptostreptococcaceae	79	30
Phenylacetate	Anaerovorax	Metabolite	Bacteria	PhenylacetateAnaerovorax	79	30
Phenylacetate	Ruminococcus	Metabolite	Bacteria	PhenylacetateRuminococcus	79	28
Phenylacetate	Unclassified Acetobacteraceae	Metabolite	Bacteria	PhenylacetateUnclassified Acetobacteraceae	79	25
Phenylacetate	Unclassified Synergistaceae	Metabolite	Bacteria	PhenylacetateUnclassified Synergistaceae	79	23
Phenylacetate	Peptostreptococcus	Metabolite	Bacteria	PhenylacetatePeptostreptococcus	79	22
Phenylacetate	Unclassified Eubacteriaceae	Metabolite	Bacteria	PhenylacetateUnclassified Eubacteriaceae	79	17
Phenylacetate	Unclassified Anaerolineaceae	Metabolite	Bacteria	PhenylacetateUnclassified Anaerolineaceae	79	13
Phenylacetate	Turicibacter	Metabolite	Bacteria	PhenylacetateTuricibacter	79	5
Phenylacetate	Pseudomonas	Metabolite	Bacteria	PhenylacetatePseudomonas	79	2
1,3-Dihydroxyacetone	Bacteroides	Metabolite	Bacteria	1,3-DihydroxyacetoneBacteroides	77	60
Aspartate	Bacteroides	Metabolite	Bacteria	AspartateBacteroides	77	60
Valerate	Bacteroides	Metabolite	Bacteria	ValerateBacteroides	77	60
1,3-Dihydroxyacetone	Unclassified Anaeroplasmataceae	Metabolite	Bacteria	1,3-DihydroxyacetoneUnclassified Anaeroplasmataceae	77	59
1,3-Dihydroxyacetone	Unclassified Actinomycetaceae	Metabolite	Bacteria	1,3-DihydroxyacetoneUnclassified Actinomycetaceae	77	59
1,3-Dihydroxyacetone	Fusobacterium	Metabolite	Bacteria	1,3-DihydroxyacetoneFusobacterium	77	59
1,3-Dihydroxyacetone	SR1_genera_incertae_sedis	Metabolite	Bacteria	1,3-DihydroxyacetoneSR1_genera_incertae_sedis	77	59
1,3-Dihydroxyacetone	Unclassified Succinivibrionaceae	Metabolite	Bacteria	1,3-DihydroxyacetoneUnclassified Succinivibrionaceae	77	59
Aspartate	Unclassified Anaeroplasmataceae	Metabolite	Bacteria	AspartateUnclassified Anaeroplasmataceae	77	59
Aspartate	Unclassified Actinomycetaceae	Metabolite	Bacteria	AspartateUnclassified Actinomycetaceae	77	59
Aspartate	Fusobacterium	Metabolite	Bacteria	AspartateFusobacterium	77	59
Aspartate	SR1_genera_incertae_sedis	Metabolite	Bacteria	AspartateSR1_genera_incertae_sedis	77	59
Aspartate	Unclassified Succinivibrionaceae	Metabolite	Bacteria	AspartateUnclassified Succinivibrionaceae	77	59
Valerate	Unclassified Anaeroplasmataceae	Metabolite	Bacteria	ValerateUnclassified Anaeroplasmataceae	77	59
Valerate	Unclassified Actinomycetaceae	Metabolite	Bacteria	ValerateUnclassified Actinomycetaceae	77	59
Valerate	Fusobacterium	Metabolite	Bacteria	ValerateFusobacterium	77	59
Valerate	SR1_genera_incertae_sedis	Metabolite	Bacteria	ValerateSR1_genera_incertae_sedis	77	59
Valerate	Unclassified Succinivibrionaceae	Metabolite	Bacteria	ValerateUnclassified Succinivibrionaceae	77	59
1,3-Dihydroxyacetone	Megasphaera	Metabolite	Bacteria	1,3-DihydroxyacetoneMegasphaera	77	59
1,3-Dihydroxyacetone	Unclassified Erysipelotrichaceae	Metabolite	Bacteria	1,3-DihydroxyacetoneUnclassified Erysipelotrichaceae	77	59
Aspartate	Megasphaera	Metabolite	Bacteria	AspartateMegasphaera	77	59
Aspartate	Pseudobutyrivibrio	Metabolite	Bacteria	AspartatePseudobutyrivibrio	77	59
Aspartate	Unclassified Erysipelotrichaceae	Metabolite	Bacteria	AspartateUnclassified Erysipelotrichaceae	77	59
Valerate	Pseudobutyrivibrio	Metabolite	Bacteria	ValeratePseudobutyrivibrio	77	59
Valerate	Unclassified Erysipelotrichaceae	Metabolite	Bacteria	ValerateUnclassified Erysipelotrichaceae	77	59
1,3-Dihydroxyacetone	Unclassified Bacteria	Metabolite	Bacteria	1,3-DihydroxyacetoneUnclassified Bacteria	77	59
1,3-Dihydroxyacetone	Pseudobutyrivibrio	Metabolite	Bacteria	1,3-DihydroxyacetonePseudobutyrivibrio	77	59
Valerate	Megasphaera	Metabolite	Bacteria	ValerateMegasphaera	77	59
Aspartate	Unclassified Bacteria	Metabolite	Bacteria	AspartateUnclassified Bacteria	77	59
Valerate	Unclassified Bacteria	Metabolite	Bacteria	ValerateUnclassified Bacteria	77	59
1,3-Dihydroxyacetone	Treponema	Metabolite	Bacteria	1,3-DihydroxyacetoneTreponema	77	59
Aspartate	Treponema	Metabolite	Bacteria	AspartateTreponema	77	59
Valerate	Treponema	Metabolite	Bacteria	ValerateTreponema	77	59
1,3-Dihydroxyacetone	Porphyromonas	Metabolite	Bacteria	1,3-DihydroxyacetonePorphyromonas	77	58
Aspartate	Porphyromonas	Metabolite	Bacteria	AspartatePorphyromonas	77	58
Valerate	Porphyromonas	Metabolite	Bacteria	ValeratePorphyromonas	77	58
Aspartate	Unclassified Neisseriaceae	Metabolite	Bacteria	AspartateUnclassified Neisseriaceae	77	58
Aspartate	Unclassified Spirochaetales	Metabolite	Bacteria	AspartateUnclassified Spirochaetales	77	58
Valerate	Unclassified Neisseriaceae	Metabolite	Bacteria	ValerateUnclassified Neisseriaceae	77	58
1,3-Dihydroxyacetone	Unclassified Spirochaetales	Metabolite	Bacteria	1,3-DihydroxyacetoneUnclassified Spirochaetales	77	58
1,3-Dihydroxyacetone	Unclassified Neisseriaceae	Metabolite	Bacteria	1,3-DihydroxyacetoneUnclassified Neisseriaceae	77	58
Valerate	Unclassified Spirochaetales	Metabolite	Bacteria	ValerateUnclassified Spirochaetales	77	58
1,3-Dihydroxyacetone	Unclassified Subdivision5_genera_incertae_sedis	Metabolite	Bacteria	1,3-DihydroxyacetoneUnclassified Subdivision5_genera_incertae_sedis	77	57
Aspartate	Unclassified Subdivision5_genera_incertae_sedis	Metabolite	Bacteria	AspartateUnclassified Subdivision5_genera_incertae_sedis	77	57
Valerate	Unclassified Subdivision5_genera_incertae_sedis	Metabolite	Bacteria	ValerateUnclassified Subdivision5_genera_incertae_sedis	77	57
1,3-Dihydroxyacetone	Ruminobacter	Metabolite	Bacteria	1,3-DihydroxyacetoneRuminobacter	77	57
1,3-Dihydroxyacetone	Asteroleplasma	Metabolite	Bacteria	1,3-DihydroxyacetoneAsteroleplasma	77	57
Valerate	Asteroleplasma	Metabolite	Bacteria	ValerateAsteroleplasma	77	57
Aspartate	Ruminobacter	Metabolite	Bacteria	AspartateRuminobacter	77	57
Aspartate	Asteroleplasma	Metabolite	Bacteria	AspartateAsteroleplasma	77	57
Valerate	Ruminobacter	Metabolite	Bacteria	ValerateRuminobacter	77	57
Aspartate	Lachnospiracea_incertae_sedis	Metabolite	Bacteria	AspartateLachnospiracea_incertae_sedis	77	57
Valerate	Lachnospiracea_incertae_sedis	Metabolite	Bacteria	ValerateLachnospiracea_incertae_sedis	77	57
1,3-Dihydroxyacetone	Lachnospiracea_incertae_sedis	Metabolite	Bacteria	1,3-DihydroxyacetoneLachnospiracea_incertae_sedis	77	57
1,3-Dihydroxyacetone	Campylobacter	Metabolite	Bacteria	1,3-DihydroxyacetoneCampylobacter	77	56
Aspartate	Campylobacter	Metabolite	Bacteria	AspartateCampylobacter	77	56
Valerate	Campylobacter	Metabolite	Bacteria	ValerateCampylobacter	77	56
1,3-Dihydroxyacetone	Saccharibacteria_genera_incertae_sedis	Metabolite	Bacteria	1,3-DihydroxyacetoneSaccharibacteria_genera_incertae_sedis	77	56
1,3-Dihydroxyacetone	Unclassified Spirochaetia	Metabolite	Bacteria	1,3-DihydroxyacetoneUnclassified Spirochaetia	77	56
Aspartate	Saccharibacteria_genera_incertae_sedis	Metabolite	Bacteria	AspartateSaccharibacteria_genera_incertae_sedis	77	56
Aspartate	Unclassified Spirochaetia	Metabolite	Bacteria	AspartateUnclassified Spirochaetia	77	56
Aspartate	Unclassified Mollicutes	Metabolite	Bacteria	AspartateUnclassified Mollicutes	77	56
Valerate	Unclassified Mollicutes	Metabolite	Bacteria	ValerateUnclassified Mollicutes	77	56
Valerate	Saccharibacteria_genera_incertae_sedis	Metabolite	Bacteria	ValerateSaccharibacteria_genera_incertae_sedis	77	56
Valerate	Unclassified Spirochaetia	Metabolite	Bacteria	ValerateUnclassified Spirochaetia	77	56
1,3-Dihydroxyacetone	Eisenbergiella	Metabolite	Bacteria	1,3-DihydroxyacetoneEisenbergiella	77	56
1,3-Dihydroxyacetone	Unclassified Mollicutes	Metabolite	Bacteria	1,3-DihydroxyacetoneUnclassified Mollicutes	77	56
Valerate	Olsenella	Metabolite	Bacteria	ValerateOlsenella	77	56
1,3-Dihydroxyacetone	Olsenella	Metabolite	Bacteria	1,3-DihydroxyacetoneOlsenella	77	56
Aspartate	Olsenella	Metabolite	Bacteria	AspartateOlsenella	77	56
Aspartate	Eisenbergiella	Metabolite	Bacteria	AspartateEisenbergiella	77	56
Valerate	Eisenbergiella	Metabolite	Bacteria	ValerateEisenbergiella	77	56
1,3-Dihydroxyacetone	Unclassified Bifidobacteriaceae	Metabolite	Bacteria	1,3-DihydroxyacetoneUnclassified Bifidobacteriaceae	77	55
Aspartate	Unclassified Bifidobacteriaceae	Metabolite	Bacteria	AspartateUnclassified Bifidobacteriaceae	77	55
Valerate	Unclassified Bifidobacteriaceae	Metabolite	Bacteria	ValerateUnclassified Bifidobacteriaceae	77	55
Aspartate	Unclassified Lachnospiraceae	Metabolite	Bacteria	AspartateUnclassified Lachnospiraceae	77	54
1,3-Dihydroxyacetone	Dialister	Metabolite	Bacteria	1,3-DihydroxyacetoneDialister	77	54
1,3-Dihydroxyacetone	Streptococcus	Metabolite	Bacteria	1,3-DihydroxyacetoneStreptococcus	77	54
1,3-Dihydroxyacetone	Unclassified Clostridiaceae 1	Metabolite	Bacteria	1,3-DihydroxyacetoneUnclassified Clostridiaceae 1	77	54
Aspartate	Streptococcus	Metabolite	Bacteria	AspartateStreptococcus	77	54
1,3-Dihydroxyacetone	Unclassified Alphaproteobacteria	Metabolite	Bacteria	1,3-DihydroxyacetoneUnclassified Alphaproteobacteria	77	54
Aspartate	Unclassified Alphaproteobacteria	Metabolite	Bacteria	AspartateUnclassified Alphaproteobacteria	77	54
Aspartate	Dialister	Metabolite	Bacteria	AspartateDialister	77	54
1,3-Dihydroxyacetone	Unclassified Lachnospiraceae	Metabolite	Bacteria	1,3-DihydroxyacetoneUnclassified Lachnospiraceae	77	54
Aspartate	Unclassified Clostridiaceae 1	Metabolite	Bacteria	AspartateUnclassified Clostridiaceae 1	77	54
Valerate	Unclassified Lachnospiraceae	Metabolite	Bacteria	ValerateUnclassified Lachnospiraceae	77	54
Valerate	Streptococcus	Metabolite	Bacteria	ValerateStreptococcus	77	54
Valerate	Unclassified Clostridiaceae 1	Metabolite	Bacteria	ValerateUnclassified Clostridiaceae 1	77	54
Valerate	Unclassified Alphaproteobacteria	Metabolite	Bacteria	ValerateUnclassified Alphaproteobacteria	77	54
Valerate	Dialister	Metabolite	Bacteria	ValerateDialister	77	54
1,3-Dihydroxyacetone	Unclassified Burkholderiales	Metabolite	Bacteria	1,3-DihydroxyacetoneUnclassified Burkholderiales	77	53
Aspartate	Unclassified Burkholderiales	Metabolite	Bacteria	AspartateUnclassified Burkholderiales	77	53
Aspartate	Roseburia	Metabolite	Bacteria	AspartateRoseburia	77	53
1,3-Dihydroxyacetone	Roseburia	Metabolite	Bacteria	1,3-DihydroxyacetoneRoseburia	77	53
Valerate	Roseburia	Metabolite	Bacteria	ValerateRoseburia	77	53
Aspartate	Anaerovibrio	Metabolite	Bacteria	AspartateAnaerovibrio	77	51
1,3-Dihydroxyacetone	Anaerovibrio	Metabolite	Bacteria	1,3-DihydroxyacetoneAnaerovibrio	77	51
Valerate	Succiniclasticum	Metabolite	Bacteria	ValerateSucciniclasticum	77	51
Aspartate	Succiniclasticum	Metabolite	Bacteria	AspartateSucciniclasticum	77	51
1,3-Dihydroxyacetone	Catenisphaera	Metabolite	Bacteria	1,3-DihydroxyacetoneCatenisphaera	77	50
1,3-Dihydroxyacetone	Unclassified Acidaminococcaceae	Metabolite	Bacteria	1,3-DihydroxyacetoneUnclassified Acidaminococcaceae	77	50
1,3-Dihydroxyacetone	Unclassified Desulfobulbaceae	Metabolite	Bacteria	1,3-DihydroxyacetoneUnclassified Desulfobulbaceae	77	50
Aspartate	Unclassified Desulfobulbaceae	Metabolite	Bacteria	AspartateUnclassified Desulfobulbaceae	77	50
Aspartate	Catenisphaera	Metabolite	Bacteria	AspartateCatenisphaera	77	50
1,3-Dihydroxyacetone	Sharpea	Metabolite	Bacteria	1,3-DihydroxyacetoneSharpea	77	50
Aspartate	Fibrobacter	Metabolite	Bacteria	AspartateFibrobacter	77	50
Aspartate	Sharpea	Metabolite	Bacteria	AspartateSharpea	77	50
Aspartate	Unclassified Acidaminococcaceae	Metabolite	Bacteria	AspartateUnclassified Acidaminococcaceae	77	50
Valerate	Unclassified Desulfobulbaceae	Metabolite	Bacteria	ValerateUnclassified Desulfobulbaceae	77	50
Valerate	Catenisphaera	Metabolite	Bacteria	ValerateCatenisphaera	77	50
Valerate	Sharpea	Metabolite	Bacteria	ValerateSharpea	77	50
Valerate	Unclassified Acidaminococcaceae	Metabolite	Bacteria	ValerateUnclassified Acidaminococcaceae	77	50
Valerate	Fibrobacter	Metabolite	Bacteria	ValerateFibrobacter	77	50
Aspartate	Unclassified Spirochaetaceae	Metabolite	Bacteria	AspartateUnclassified Spirochaetaceae	77	49
1,3-Dihydroxyacetone	Unclassified Spirochaetaceae	Metabolite	Bacteria	1,3-DihydroxyacetoneUnclassified Spirochaetaceae	77	49
Aspartate	Acidaminococcus	Metabolite	Bacteria	AspartateAcidaminococcus	77	49
1,3-Dihydroxyacetone	Acidaminococcus	Metabolite	Bacteria	1,3-DihydroxyacetoneAcidaminococcus	77	49
Valerate	Acidaminococcus	Metabolite	Bacteria	ValerateAcidaminococcus	77	49
Valerate	Unclassified Spirochaetaceae	Metabolite	Bacteria	ValerateUnclassified Spirochaetaceae	77	49
1,3-Dihydroxyacetone	Denitrobacterium	Metabolite	Bacteria	1,3-DihydroxyacetoneDenitrobacterium	77	48
Aspartate	Lactobacillus	Metabolite	Bacteria	AspartateLactobacillus	77	48
Valerate	Denitrobacterium	Metabolite	Bacteria	ValerateDenitrobacterium	77	48
1,3-Dihydroxyacetone	Unclassified Coriobacteriaceae	Metabolite	Bacteria	1,3-DihydroxyacetoneUnclassified Coriobacteriaceae	77	48
Aspartate	Pseudoscardovia	Metabolite	Bacteria	AspartatePseudoscardovia	77	48
Aspartate	Unclassified Coriobacteriaceae	Metabolite	Bacteria	AspartateUnclassified Coriobacteriaceae	77	48
Valerate	Unclassified Coriobacteriaceae	Metabolite	Bacteria	ValerateUnclassified Coriobacteriaceae	77	48
1,3-Dihydroxyacetone	Pseudoscardovia	Metabolite	Bacteria	1,3-DihydroxyacetonePseudoscardovia	77	48
Valerate	Pseudoscardovia	Metabolite	Bacteria	ValeratePseudoscardovia	77	48
Valerate	Lactobacillus	Metabolite	Bacteria	ValerateLactobacillus	77	48
Aspartate	Denitrobacterium	Metabolite	Bacteria	AspartateDenitrobacterium	77	48
Aspartate	Corynebacterium	Metabolite	Bacteria	AspartateCorynebacterium	77	47
Aspartate	Unclassified Gammaproteobacteria	Metabolite	Bacteria	AspartateUnclassified Gammaproteobacteria	77	47
1,3-Dihydroxyacetone	Unclassified Betaproteobacteria	Metabolite	Bacteria	1,3-DihydroxyacetoneUnclassified Betaproteobacteria	77	47
Valerate	Corynebacterium	Metabolite	Bacteria	ValerateCorynebacterium	77	47
Aspartate	Unclassified Betaproteobacteria	Metabolite	Bacteria	AspartateUnclassified Betaproteobacteria	77	47
Valerate	Unclassified Bacteroidia	Metabolite	Bacteria	ValerateUnclassified Bacteroidia	77	47
1,3-Dihydroxyacetone	Unclassified Bacteroidia	Metabolite	Bacteria	1,3-DihydroxyacetoneUnclassified Bacteroidia	77	47
1,3-Dihydroxyacetone	Corynebacterium	Metabolite	Bacteria	1,3-DihydroxyacetoneCorynebacterium	77	47
Valerate	Unclassified Gammaproteobacteria	Metabolite	Bacteria	ValerateUnclassified Gammaproteobacteria	77	47
Aspartate	Unclassified Bacteroidia	Metabolite	Bacteria	AspartateUnclassified Bacteroidia	77	47
1,3-Dihydroxyacetone	Unclassified Gammaproteobacteria	Metabolite	Bacteria	1,3-DihydroxyacetoneUnclassified Gammaproteobacteria	77	47
Valerate	Bifidobacterium	Metabolite	Bacteria	ValerateBifidobacterium	77	46
1,3-Dihydroxyacetone	Schwartzia	Metabolite	Bacteria	1,3-DihydroxyacetoneSchwartzia	77	46
Valerate	Unclassified Prevotellaceae	Metabolite	Bacteria	ValerateUnclassified Prevotellaceae	77	46
Valerate	Unclassified SR1_genera_incertae_sedis	Metabolite	Bacteria	ValerateUnclassified SR1_genera_incertae_sedis	77	46
Aspartate	Schwartzia	Metabolite	Bacteria	AspartateSchwartzia	77	46
Aspartate	Bifidobacterium	Metabolite	Bacteria	AspartateBifidobacterium	77	46
1,3-Dihydroxyacetone	Unclassified SR1_genera_incertae_sedis	Metabolite	Bacteria	1,3-DihydroxyacetoneUnclassified SR1_genera_incertae_sedis	77	46
Valerate	Unclassified Ruminococcaceae	Metabolite	Bacteria	ValerateUnclassified Ruminococcaceae	77	46
Aspartate	Unclassified Ruminococcaceae	Metabolite	Bacteria	AspartateUnclassified Ruminococcaceae	77	46
Aspartate	Unclassified SR1_genera_incertae_sedis	Metabolite	Bacteria	AspartateUnclassified SR1_genera_incertae_sedis	77	46
Valerate	Schwartzia	Metabolite	Bacteria	ValerateSchwartzia	77	46
Aspartate	Unclassified Prevotellaceae	Metabolite	Bacteria	AspartateUnclassified Prevotellaceae	77	46
1,3-Dihydroxyacetone	Unclassified Streptococcaceae	Metabolite	Bacteria	1,3-DihydroxyacetoneUnclassified Streptococcaceae	77	45
Valerate	Unclassified Streptococcaceae	Metabolite	Bacteria	ValerateUnclassified Streptococcaceae	77	45
Valerate	Unclassified Clostridiales_Incertae Sedis XIII	Metabolite	Bacteria	ValerateUnclassified Clostridiales_Incertae Sedis XIII	77	45
Aspartate	Unclassified Clostridiales_Incertae Sedis XIII	Metabolite	Bacteria	AspartateUnclassified Clostridiales_Incertae Sedis XIII	77	45
1,3-Dihydroxyacetone	Unclassified Clostridiales_Incertae Sedis XIII	Metabolite	Bacteria	1,3-DihydroxyacetoneUnclassified Clostridiales_Incertae Sedis XIII	77	45
Aspartate	Syntrophococcus	Metabolite	Bacteria	AspartateSyntrophococcus	77	44
1,3-Dihydroxyacetone	Anaeroplasma	Metabolite	Bacteria	1,3-DihydroxyacetoneAnaeroplasma	77	44
1,3-Dihydroxyacetone	Unclassified Selenomonadales	Metabolite	Bacteria	1,3-DihydroxyacetoneUnclassified Selenomonadales	77	44
Aspartate	Anaeroplasma	Metabolite	Bacteria	AspartateAnaeroplasma	77	44
1,3-Dihydroxyacetone	Butyrivibrio	Metabolite	Bacteria	1,3-DihydroxyacetoneButyrivibrio	77	44
1,3-Dihydroxyacetone	Syntrophococcus	Metabolite	Bacteria	1,3-DihydroxyacetoneSyntrophococcus	77	44
Valerate	Anaeroplasma	Metabolite	Bacteria	ValerateAnaeroplasma	77	44
1,3-Dihydroxyacetone	Prevotella	Metabolite	Bacteria	1,3-DihydroxyacetonePrevotella	77	41
Aspartate	Prevotella	Metabolite	Bacteria	AspartatePrevotella	77	41
1,3-Dihydroxyacetone	Unclassified Bacteroidales	Metabolite	Bacteria	1,3-DihydroxyacetoneUnclassified Bacteroidales	77	41
Valerate	Prevotella	Metabolite	Bacteria	ValeratePrevotella	77	41
Aspartate	Unclassified Bacteroidales	Metabolite	Bacteria	AspartateUnclassified Bacteroidales	77	41
Aspartate	Selenomonas	Metabolite	Bacteria	AspartateSelenomonas	77	40
Valerate	Allisonella	Metabolite	Bacteria	ValerateAllisonella	77	40
Valerate	Selenomonas	Metabolite	Bacteria	ValerateSelenomonas	77	40
1,3-Dihydroxyacetone	Allisonella	Metabolite	Bacteria	1,3-DihydroxyacetoneAllisonella	77	40
Valerate	Unclassified Bacteroidetes	Metabolite	Bacteria	ValerateUnclassified Bacteroidetes	77	39
1,3-Dihydroxyacetone	Unclassified Bacteroidetes	Metabolite	Bacteria	1,3-DihydroxyacetoneUnclassified Bacteroidetes	77	39
Aspartate	Unclassified Bacteroidetes	Metabolite	Bacteria	AspartateUnclassified Bacteroidetes	77	39
Valerate	Unclassified Actinobacteria	Metabolite	Bacteria	ValerateUnclassified Actinobacteria	77	38
Valerate	Unclassified Clostridia	Metabolite	Bacteria	ValerateUnclassified Clostridia	77	38
Aspartate	Succinivibrio	Metabolite	Bacteria	AspartateSuccinivibrio	77	38
1,3-Dihydroxyacetone	Unclassified Clostridia	Metabolite	Bacteria	1,3-DihydroxyacetoneUnclassified Clostridia	77	38
1,3-Dihydroxyacetone	Clostridium sensu stricto	Metabolite	Bacteria	1,3-DihydroxyacetoneClostridium sensu stricto	77	38
1,3-Dihydroxyacetone	Unclassified Actinobacteria	Metabolite	Bacteria	1,3-DihydroxyacetoneUnclassified Actinobacteria	77	38
Valerate	Clostridium sensu stricto	Metabolite	Bacteria	ValerateClostridium sensu stricto	77	38
Valerate	Succinivibrio	Metabolite	Bacteria	ValerateSuccinivibrio	77	38
Aspartate	Unclassified Clostridia	Metabolite	Bacteria	AspartateUnclassified Clostridia	77	38
1,3-Dihydroxyacetone	Succinivibrio	Metabolite	Bacteria	1,3-DihydroxyacetoneSuccinivibrio	77	38
Aspartate	Unclassified Clostridiales	Metabolite	Bacteria	AspartateUnclassified Clostridiales	77	36
1,3-Dihydroxyacetone	Unclassified Clostridiales	Metabolite	Bacteria	1,3-DihydroxyacetoneUnclassified Clostridiales	77	36
Valerate	Unclassified Clostridiales	Metabolite	Bacteria	ValerateUnclassified Clostridiales	77	36
1,3-Dihydroxyacetone	Unclassified Porphyromonadaceae	Metabolite	Bacteria	1,3-DihydroxyacetoneUnclassified Porphyromonadaceae	77	35
Aspartate	Unclassified Porphyromonadaceae	Metabolite	Bacteria	AspartateUnclassified Porphyromonadaceae	77	35
Aspartate	Unclassified Deltaproteobacteria	Metabolite	Bacteria	AspartateUnclassified Deltaproteobacteria	77	35
1,3-Dihydroxyacetone	Unclassified Deltaproteobacteria	Metabolite	Bacteria	1,3-DihydroxyacetoneUnclassified Deltaproteobacteria	77	35
Valerate	Unclassified Veillonellaceae	Metabolite	Bacteria	ValerateUnclassified Veillonellaceae	77	35
Valerate	Unclassified Saccharibacteria_genera_incertae_sedis	Metabolite	Bacteria	ValerateUnclassified Saccharibacteria_genera_incertae_sedis	77	35
Valerate	Unclassified Porphyromonadaceae	Metabolite	Bacteria	ValerateUnclassified Porphyromonadaceae	77	35
Aspartate	Unclassified Saccharibacteria_genera_incertae_sedis	Metabolite	Bacteria	AspartateUnclassified Saccharibacteria_genera_incertae_sedis	77	35
Valerate	Unclassified Deltaproteobacteria	Metabolite	Bacteria	ValerateUnclassified Deltaproteobacteria	77	35
1,3-Dihydroxyacetone	Unclassified Marinilabiliaceae	Metabolite	Bacteria	1,3-DihydroxyacetoneUnclassified Marinilabiliaceae	77	33
1,3-Dihydroxyacetone	Unclassified Anaeroplasmatales	Metabolite	Bacteria	1,3-DihydroxyacetoneUnclassified Anaeroplasmatales	77	33
Aspartate	Unclassified Anaeroplasmatales	Metabolite	Bacteria	AspartateUnclassified Anaeroplasmatales	77	33
Aspartate	Unclassified Erysipelotrichales	Metabolite	Bacteria	AspartateUnclassified Erysipelotrichales	77	33
Aspartate	Unclassified Marinilabiliaceae	Metabolite	Bacteria	AspartateUnclassified Marinilabiliaceae	77	33
1,3-Dihydroxyacetone	Unclassified Erysipelotrichales	Metabolite	Bacteria	1,3-DihydroxyacetoneUnclassified Erysipelotrichales	77	33
Valerate	Unclassified Anaeroplasmatales	Metabolite	Bacteria	ValerateUnclassified Anaeroplasmatales	77	33
1,3-Dihydroxyacetone	Unclassified Lentisphaerae	Metabolite	Bacteria	1,3-DihydroxyacetoneUnclassified Lentisphaerae	77	31
Valerate	Unclassified Proteobacteria	Metabolite	Bacteria	ValerateUnclassified Proteobacteria	77	31
Aspartate	Unclassified Lentisphaerae	Metabolite	Bacteria	AspartateUnclassified Lentisphaerae	77	31
Aspartate	Unclassified Elusimicrobia	Metabolite	Bacteria	AspartateUnclassified Elusimicrobia	77	30
Valerate	Anaerovorax	Metabolite	Bacteria	ValerateAnaerovorax	77	30
Valerate	Unclassified Coriobacteriales	Metabolite	Bacteria	ValerateUnclassified Coriobacteriales	77	28
Aspartate	Unclassified Coriobacteriales	Metabolite	Bacteria	AspartateUnclassified Coriobacteriales	77	28
Valerate	Ruminococcus	Metabolite	Bacteria	ValerateRuminococcus	77	28
1,3-Dihydroxyacetone	Succinimonas	Metabolite	Bacteria	1,3-DihydroxyacetoneSuccinimonas	77	26
Aspartate	Succinimonas	Metabolite	Bacteria	AspartateSuccinimonas	77	26
Valerate	Succinimonas	Metabolite	Bacteria	ValerateSuccinimonas	77	26
1,3-Dihydroxyacetone	Unclassified Acetobacteraceae	Metabolite	Bacteria	1,3-DihydroxyacetoneUnclassified Acetobacteraceae	77	25
Aspartate	Unclassified Acetobacteraceae	Metabolite	Bacteria	AspartateUnclassified Acetobacteraceae	77	25
1,3-Dihydroxyacetone	Unclassified Synergistaceae	Metabolite	Bacteria	1,3-DihydroxyacetoneUnclassified Synergistaceae	77	23
Aspartate	Anaerofustis	Metabolite	Bacteria	AspartateAnaerofustis	77	20
1,3-Dihydroxyacetone	Anaerofustis	Metabolite	Bacteria	1,3-DihydroxyacetoneAnaerofustis	77	20
Valerate	Unclassified Enterobacteriaceae	Metabolite	Bacteria	ValerateUnclassified Enterobacteriaceae	77	19
1,3-Dihydroxyacetone	Lampropedia	Metabolite	Bacteria	1,3-DihydroxyacetoneLampropedia	77	18
Aspartate	Lampropedia	Metabolite	Bacteria	AspartateLampropedia	77	18
Valerate	Lampropedia	Metabolite	Bacteria	ValerateLampropedia	77	18
Valerate	Unclassified Eubacteriaceae	Metabolite	Bacteria	ValerateUnclassified Eubacteriaceae	77	17
1,3-Dihydroxyacetone	Bavariicoccus	Metabolite	Bacteria	1,3-DihydroxyacetoneBavariicoccus	77	13
1,3-Dihydroxyacetone	Unclassified Anaerolineaceae	Metabolite	Bacteria	1,3-DihydroxyacetoneUnclassified Anaerolineaceae	77	13
Valerate	Weissella	Metabolite	Bacteria	ValerateWeissella	77	11
1,3-Dihydroxyacetone	Unclassified Actinomycetales	Metabolite	Bacteria	1,3-DihydroxyacetoneUnclassified Actinomycetales	77	4
Serine	Bacteroides	Metabolite	Bacteria	SerineBacteroides	76	60
Isopropanol	Bacteroides	Metabolite	Bacteria	IsopropanolBacteroides	76	60
Valine	Bacteroides	Metabolite	Bacteria	ValineBacteroides	76	60
Fumarate	Bacteroides	Metabolite	Bacteria	FumarateBacteroides	76	60
Serine	Unclassified Anaeroplasmataceae	Metabolite	Bacteria	SerineUnclassified Anaeroplasmataceae	76	59
Serine	Unclassified Actinomycetaceae	Metabolite	Bacteria	SerineUnclassified Actinomycetaceae	76	59
Serine	Fusobacterium	Metabolite	Bacteria	SerineFusobacterium	76	59
Serine	SR1_genera_incertae_sedis	Metabolite	Bacteria	SerineSR1_genera_incertae_sedis	76	59
Serine	Unclassified Succinivibrionaceae	Metabolite	Bacteria	SerineUnclassified Succinivibrionaceae	76	59
Isopropanol	Unclassified Anaeroplasmataceae	Metabolite	Bacteria	IsopropanolUnclassified Anaeroplasmataceae	76	59
Isopropanol	Unclassified Actinomycetaceae	Metabolite	Bacteria	IsopropanolUnclassified Actinomycetaceae	76	59
Isopropanol	Fusobacterium	Metabolite	Bacteria	IsopropanolFusobacterium	76	59
Isopropanol	SR1_genera_incertae_sedis	Metabolite	Bacteria	IsopropanolSR1_genera_incertae_sedis	76	59
Isopropanol	Unclassified Succinivibrionaceae	Metabolite	Bacteria	IsopropanolUnclassified Succinivibrionaceae	76	59
Valine	Unclassified Anaeroplasmataceae	Metabolite	Bacteria	ValineUnclassified Anaeroplasmataceae	76	59
Valine	Unclassified Actinomycetaceae	Metabolite	Bacteria	ValineUnclassified Actinomycetaceae	76	59
Valine	Fusobacterium	Metabolite	Bacteria	ValineFusobacterium	76	59
Valine	SR1_genera_incertae_sedis	Metabolite	Bacteria	ValineSR1_genera_incertae_sedis	76	59
Valine	Unclassified Succinivibrionaceae	Metabolite	Bacteria	ValineUnclassified Succinivibrionaceae	76	59
Serine	Megasphaera	Metabolite	Bacteria	SerineMegasphaera	76	59
Serine	Pseudobutyrivibrio	Metabolite	Bacteria	SerinePseudobutyrivibrio	76	59
Serine	Unclassified Erysipelotrichaceae	Metabolite	Bacteria	SerineUnclassified Erysipelotrichaceae	76	59
Fumarate	Megasphaera	Metabolite	Bacteria	FumarateMegasphaera	76	59
Fumarate	Unclassified Actinomycetaceae	Metabolite	Bacteria	FumarateUnclassified Actinomycetaceae	76	59
Fumarate	SR1_genera_incertae_sedis	Metabolite	Bacteria	FumarateSR1_genera_incertae_sedis	76	59
Isopropanol	Megasphaera	Metabolite	Bacteria	IsopropanolMegasphaera	76	59
Isopropanol	Pseudobutyrivibrio	Metabolite	Bacteria	IsopropanolPseudobutyrivibrio	76	59
Isopropanol	Unclassified Erysipelotrichaceae	Metabolite	Bacteria	IsopropanolUnclassified Erysipelotrichaceae	76	59
Valine	Megasphaera	Metabolite	Bacteria	ValineMegasphaera	76	59
Valine	Pseudobutyrivibrio	Metabolite	Bacteria	ValinePseudobutyrivibrio	76	59
Valine	Unclassified Erysipelotrichaceae	Metabolite	Bacteria	ValineUnclassified Erysipelotrichaceae	76	59
Fumarate	Pseudobutyrivibrio	Metabolite	Bacteria	FumaratePseudobutyrivibrio	76	59
Fumarate	Unclassified Succinivibrionaceae	Metabolite	Bacteria	FumarateUnclassified Succinivibrionaceae	76	59
Fumarate	Unclassified Anaeroplasmataceae	Metabolite	Bacteria	FumarateUnclassified Anaeroplasmataceae	76	59
Fumarate	Fusobacterium	Metabolite	Bacteria	FumarateFusobacterium	76	59
Fumarate	Unclassified Erysipelotrichaceae	Metabolite	Bacteria	FumarateUnclassified Erysipelotrichaceae	76	59
Serine	Unclassified Bacteria	Metabolite	Bacteria	SerineUnclassified Bacteria	76	59
Isopropanol	Unclassified Bacteria	Metabolite	Bacteria	IsopropanolUnclassified Bacteria	76	59
Valine	Unclassified Bacteria	Metabolite	Bacteria	ValineUnclassified Bacteria	76	59
Fumarate	Unclassified Bacteria	Metabolite	Bacteria	FumarateUnclassified Bacteria	76	59
Isopropanol	Treponema	Metabolite	Bacteria	IsopropanolTreponema	76	59
Fumarate	Treponema	Metabolite	Bacteria	FumarateTreponema	76	59
Serine	Treponema	Metabolite	Bacteria	SerineTreponema	76	59
Valine	Treponema	Metabolite	Bacteria	ValineTreponema	76	59
Serine	Porphyromonas	Metabolite	Bacteria	SerinePorphyromonas	76	58
Isopropanol	Porphyromonas	Metabolite	Bacteria	IsopropanolPorphyromonas	76	58
Valine	Porphyromonas	Metabolite	Bacteria	ValinePorphyromonas	76	58
Fumarate	Porphyromonas	Metabolite	Bacteria	FumaratePorphyromonas	76	58
Serine	Unclassified Spirochaetales	Metabolite	Bacteria	SerineUnclassified Spirochaetales	76	58
Serine	Unclassified Neisseriaceae	Metabolite	Bacteria	SerineUnclassified Neisseriaceae	76	58
Fumarate	Unclassified Neisseriaceae	Metabolite	Bacteria	FumarateUnclassified Neisseriaceae	76	58
Isopropanol	Unclassified Neisseriaceae	Metabolite	Bacteria	IsopropanolUnclassified Neisseriaceae	76	58
Isopropanol	Unclassified Spirochaetales	Metabolite	Bacteria	IsopropanolUnclassified Spirochaetales	76	58
Fumarate	Unclassified Spirochaetales	Metabolite	Bacteria	FumarateUnclassified Spirochaetales	76	58
Valine	Unclassified Neisseriaceae	Metabolite	Bacteria	ValineUnclassified Neisseriaceae	76	58
Valine	Unclassified Spirochaetales	Metabolite	Bacteria	ValineUnclassified Spirochaetales	76	58
Serine	Unclassified Subdivision5_genera_incertae_sedis	Metabolite	Bacteria	SerineUnclassified Subdivision5_genera_incertae_sedis	76	57
Isopropanol	Unclassified Subdivision5_genera_incertae_sedis	Metabolite	Bacteria	IsopropanolUnclassified Subdivision5_genera_incertae_sedis	76	57
Valine	Unclassified Subdivision5_genera_incertae_sedis	Metabolite	Bacteria	ValineUnclassified Subdivision5_genera_incertae_sedis	76	57
Fumarate	Ruminobacter	Metabolite	Bacteria	FumarateRuminobacter	76	57
Fumarate	Unclassified Subdivision5_genera_incertae_sedis	Metabolite	Bacteria	FumarateUnclassified Subdivision5_genera_incertae_sedis	76	57
Isopropanol	Ruminobacter	Metabolite	Bacteria	IsopropanolRuminobacter	76	57
Serine	Ruminobacter	Metabolite	Bacteria	SerineRuminobacter	76	57
Fumarate	Asteroleplasma	Metabolite	Bacteria	FumarateAsteroleplasma	76	57
Serine	Lachnospiracea_incertae_sedis	Metabolite	Bacteria	SerineLachnospiracea_incertae_sedis	76	57
Valine	Asteroleplasma	Metabolite	Bacteria	ValineAsteroleplasma	76	57
Valine	Ruminobacter	Metabolite	Bacteria	ValineRuminobacter	76	57
Serine	Asteroleplasma	Metabolite	Bacteria	SerineAsteroleplasma	76	57
Isopropanol	Asteroleplasma	Metabolite	Bacteria	IsopropanolAsteroleplasma	76	57
Fumarate	Lachnospiracea_incertae_sedis	Metabolite	Bacteria	FumarateLachnospiracea_incertae_sedis	76	57
Valine	Lachnospiracea_incertae_sedis	Metabolite	Bacteria	ValineLachnospiracea_incertae_sedis	76	57
Isopropanol	Lachnospiracea_incertae_sedis	Metabolite	Bacteria	IsopropanolLachnospiracea_incertae_sedis	76	57
Serine	Campylobacter	Metabolite	Bacteria	SerineCampylobacter	76	56
Isopropanol	Campylobacter	Metabolite	Bacteria	IsopropanolCampylobacter	76	56
Valine	Campylobacter	Metabolite	Bacteria	ValineCampylobacter	76	56
Serine	Saccharibacteria_genera_incertae_sedis	Metabolite	Bacteria	SerineSaccharibacteria_genera_incertae_sedis	76	56
Serine	Unclassified Spirochaetia	Metabolite	Bacteria	SerineUnclassified Spirochaetia	76	56
Fumarate	Campylobacter	Metabolite	Bacteria	FumarateCampylobacter	76	56
Fumarate	Saccharibacteria_genera_incertae_sedis	Metabolite	Bacteria	FumarateSaccharibacteria_genera_incertae_sedis	76	56
Fumarate	Unclassified Spirochaetia	Metabolite	Bacteria	FumarateUnclassified Spirochaetia	76	56
Isopropanol	Saccharibacteria_genera_incertae_sedis	Metabolite	Bacteria	IsopropanolSaccharibacteria_genera_incertae_sedis	76	56
Isopropanol	Unclassified Spirochaetia	Metabolite	Bacteria	IsopropanolUnclassified Spirochaetia	76	56
Valine	Unclassified Mollicutes	Metabolite	Bacteria	ValineUnclassified Mollicutes	76	56
Valine	Saccharibacteria_genera_incertae_sedis	Metabolite	Bacteria	ValineSaccharibacteria_genera_incertae_sedis	76	56
Valine	Unclassified Spirochaetia	Metabolite	Bacteria	ValineUnclassified Spirochaetia	76	56
Fumarate	Eisenbergiella	Metabolite	Bacteria	FumarateEisenbergiella	76	56
Fumarate	Unclassified Mollicutes	Metabolite	Bacteria	FumarateUnclassified Mollicutes	76	56
Isopropanol	Eisenbergiella	Metabolite	Bacteria	IsopropanolEisenbergiella	76	56
Isopropanol	Unclassified Mollicutes	Metabolite	Bacteria	IsopropanolUnclassified Mollicutes	76	56
Serine	Unclassified Mollicutes	Metabolite	Bacteria	SerineUnclassified Mollicutes	76	56
Serine	Eisenbergiella	Metabolite	Bacteria	SerineEisenbergiella	76	56
Isopropanol	Olsenella	Metabolite	Bacteria	IsopropanolOlsenella	76	56
Serine	Olsenella	Metabolite	Bacteria	SerineOlsenella	76	56
Fumarate	Olsenella	Metabolite	Bacteria	FumarateOlsenella	76	56
Valine	Eisenbergiella	Metabolite	Bacteria	ValineEisenbergiella	76	56
Valine	Olsenella	Metabolite	Bacteria	ValineOlsenella	76	56
Serine	Unclassified Bifidobacteriaceae	Metabolite	Bacteria	SerineUnclassified Bifidobacteriaceae	76	55
Isopropanol	Unclassified Bifidobacteriaceae	Metabolite	Bacteria	IsopropanolUnclassified Bifidobacteriaceae	76	55
Valine	Unclassified Bifidobacteriaceae	Metabolite	Bacteria	ValineUnclassified Bifidobacteriaceae	76	55
Fumarate	Unclassified Bifidobacteriaceae	Metabolite	Bacteria	FumarateUnclassified Bifidobacteriaceae	76	55
Fumarate	Dialister	Metabolite	Bacteria	FumarateDialister	76	54
Isopropanol	Dialister	Metabolite	Bacteria	IsopropanolDialister	76	54
Serine	Streptococcus	Metabolite	Bacteria	SerineStreptococcus	76	54
Serine	Dialister	Metabolite	Bacteria	SerineDialister	76	54
Fumarate	Unclassified Alphaproteobacteria	Metabolite	Bacteria	FumarateUnclassified Alphaproteobacteria	76	54
Serine	Unclassified Lachnospiraceae	Metabolite	Bacteria	SerineUnclassified Lachnospiraceae	76	54
Fumarate	Unclassified Clostridiaceae 1	Metabolite	Bacteria	FumarateUnclassified Clostridiaceae 1	76	54
Serine	Unclassified Clostridiaceae 1	Metabolite	Bacteria	SerineUnclassified Clostridiaceae 1	76	54
Serine	Unclassified Alphaproteobacteria	Metabolite	Bacteria	SerineUnclassified Alphaproteobacteria	76	54
Fumarate	Streptococcus	Metabolite	Bacteria	FumarateStreptococcus	76	54
Valine	Streptococcus	Metabolite	Bacteria	ValineStreptococcus	76	54
Isopropanol	Streptococcus	Metabolite	Bacteria	IsopropanolStreptococcus	76	54
Valine	Dialister	Metabolite	Bacteria	ValineDialister	76	54
Isopropanol	Unclassified Lachnospiraceae	Metabolite	Bacteria	IsopropanolUnclassified Lachnospiraceae	76	54
Isopropanol	Unclassified Alphaproteobacteria	Metabolite	Bacteria	IsopropanolUnclassified Alphaproteobacteria	76	54
Valine	Unclassified Clostridiaceae 1	Metabolite	Bacteria	ValineUnclassified Clostridiaceae 1	76	54
Isopropanol	Unclassified Clostridiaceae 1	Metabolite	Bacteria	IsopropanolUnclassified Clostridiaceae 1	76	54
Valine	Unclassified Lachnospiraceae	Metabolite	Bacteria	ValineUnclassified Lachnospiraceae	76	54
Valine	Unclassified Alphaproteobacteria	Metabolite	Bacteria	ValineUnclassified Alphaproteobacteria	76	54
Serine	Unclassified Burkholderiales	Metabolite	Bacteria	SerineUnclassified Burkholderiales	76	53
Fumarate	Roseburia	Metabolite	Bacteria	FumarateRoseburia	76	53
Serine	Roseburia	Metabolite	Bacteria	SerineRoseburia	76	53
Fumarate	Unclassified Burkholderiales	Metabolite	Bacteria	FumarateUnclassified Burkholderiales	76	53
Valine	Roseburia	Metabolite	Bacteria	ValineRoseburia	76	53
Isopropanol	Roseburia	Metabolite	Bacteria	IsopropanolRoseburia	76	53
Isopropanol	Unclassified Burkholderiales	Metabolite	Bacteria	IsopropanolUnclassified Burkholderiales	76	53
Valine	Unclassified Burkholderiales	Metabolite	Bacteria	ValineUnclassified Burkholderiales	76	53
Fumarate	Anaerovibrio	Metabolite	Bacteria	FumarateAnaerovibrio	76	51
Isopropanol	Anaerovibrio	Metabolite	Bacteria	IsopropanolAnaerovibrio	76	51
Serine	Anaerovibrio	Metabolite	Bacteria	SerineAnaerovibrio	76	51
Serine	Succiniclasticum	Metabolite	Bacteria	SerineSucciniclasticum	76	51
Fumarate	Succiniclasticum	Metabolite	Bacteria	FumarateSucciniclasticum	76	51
Valine	Anaerovibrio	Metabolite	Bacteria	ValineAnaerovibrio	76	51
Isopropanol	Succiniclasticum	Metabolite	Bacteria	IsopropanolSucciniclasticum	76	51
Valine	Succiniclasticum	Metabolite	Bacteria	ValineSucciniclasticum	76	51
Fumarate	Unclassified Acidaminococcaceae	Metabolite	Bacteria	FumarateUnclassified Acidaminococcaceae	76	50
Isopropanol	Unclassified Acidaminococcaceae	Metabolite	Bacteria	IsopropanolUnclassified Acidaminococcaceae	76	50
Fumarate	Catenisphaera	Metabolite	Bacteria	FumarateCatenisphaera	76	50
Serine	Unclassified Acidaminococcaceae	Metabolite	Bacteria	SerineUnclassified Acidaminococcaceae	76	50
Serine	Fibrobacter	Metabolite	Bacteria	SerineFibrobacter	76	50
Serine	Unclassified Desulfobulbaceae	Metabolite	Bacteria	SerineUnclassified Desulfobulbaceae	76	50
Valine	Unclassified Acidaminococcaceae	Metabolite	Bacteria	ValineUnclassified Acidaminococcaceae	76	50
Isopropanol	Sharpea	Metabolite	Bacteria	IsopropanolSharpea	76	50
Fumarate	Sharpea	Metabolite	Bacteria	FumarateSharpea	76	50
Isopropanol	Fibrobacter	Metabolite	Bacteria	IsopropanolFibrobacter	76	50
Valine	Catenisphaera	Metabolite	Bacteria	ValineCatenisphaera	76	50
Fumarate	Unclassified Desulfobulbaceae	Metabolite	Bacteria	FumarateUnclassified Desulfobulbaceae	76	50
Valine	Fibrobacter	Metabolite	Bacteria	ValineFibrobacter	76	50
Serine	Sharpea	Metabolite	Bacteria	SerineSharpea	76	50
Valine	Unclassified Desulfobulbaceae	Metabolite	Bacteria	ValineUnclassified Desulfobulbaceae	76	50
Valine	Sharpea	Metabolite	Bacteria	ValineSharpea	76	50
Fumarate	Fibrobacter	Metabolite	Bacteria	FumarateFibrobacter	76	50
Serine	Catenisphaera	Metabolite	Bacteria	SerineCatenisphaera	76	50
Serine	Unclassified Spirochaetaceae	Metabolite	Bacteria	SerineUnclassified Spirochaetaceae	76	49
Valine	Acidaminococcus	Metabolite	Bacteria	ValineAcidaminococcus	76	49
Isopropanol	Acidaminococcus	Metabolite	Bacteria	IsopropanolAcidaminococcus	76	49
Valine	Unclassified Spirochaetaceae	Metabolite	Bacteria	ValineUnclassified Spirochaetaceae	76	49
Isopropanol	Unclassified Spirochaetaceae	Metabolite	Bacteria	IsopropanolUnclassified Spirochaetaceae	76	49
Fumarate	Unclassified Spirochaetaceae	Metabolite	Bacteria	FumarateUnclassified Spirochaetaceae	76	49
Fumarate	Acidaminococcus	Metabolite	Bacteria	FumarateAcidaminococcus	76	49
Fumarate	Denitrobacterium	Metabolite	Bacteria	FumarateDenitrobacterium	76	48
Serine	Unclassified Coriobacteriaceae	Metabolite	Bacteria	SerineUnclassified Coriobacteriaceae	76	48
Valine	Lactobacillus	Metabolite	Bacteria	ValineLactobacillus	76	48
Fumarate	Lactobacillus	Metabolite	Bacteria	FumarateLactobacillus	76	48
Isopropanol	Lactobacillus	Metabolite	Bacteria	IsopropanolLactobacillus	76	48
Serine	Pseudoscardovia	Metabolite	Bacteria	SerinePseudoscardovia	76	48
Fumarate	Unclassified Coriobacteriaceae	Metabolite	Bacteria	FumarateUnclassified Coriobacteriaceae	76	48
Isopropanol	Denitrobacterium	Metabolite	Bacteria	IsopropanolDenitrobacterium	76	48
Valine	Pseudoscardovia	Metabolite	Bacteria	ValinePseudoscardovia	76	48
Serine	Denitrobacterium	Metabolite	Bacteria	SerineDenitrobacterium	76	48
Isopropanol	Pseudoscardovia	Metabolite	Bacteria	IsopropanolPseudoscardovia	76	48
Isopropanol	Unclassified Coriobacteriaceae	Metabolite	Bacteria	IsopropanolUnclassified Coriobacteriaceae	76	48
Serine	Corynebacterium	Metabolite	Bacteria	SerineCorynebacterium	76	47
Serine	Unclassified Betaproteobacteria	Metabolite	Bacteria	SerineUnclassified Betaproteobacteria	76	47
Fumarate	Corynebacterium	Metabolite	Bacteria	FumarateCorynebacterium	76	47
Isopropanol	Unclassified Bacteroidia	Metabolite	Bacteria	IsopropanolUnclassified Bacteroidia	76	47
Serine	Unclassified Gammaproteobacteria	Metabolite	Bacteria	SerineUnclassified Gammaproteobacteria	76	47
Valine	Corynebacterium	Metabolite	Bacteria	ValineCorynebacterium	76	47
Valine	Unclassified Gammaproteobacteria	Metabolite	Bacteria	ValineUnclassified Gammaproteobacteria	76	47
Valine	Unclassified Betaproteobacteria	Metabolite	Bacteria	ValineUnclassified Betaproteobacteria	76	47
Isopropanol	Unclassified Gammaproteobacteria	Metabolite	Bacteria	IsopropanolUnclassified Gammaproteobacteria	76	47
Serine	Unclassified Bacteroidia	Metabolite	Bacteria	SerineUnclassified Bacteroidia	76	47
Fumarate	Unclassified Gammaproteobacteria	Metabolite	Bacteria	FumarateUnclassified Gammaproteobacteria	76	47
Valine	Unclassified Bacteroidia	Metabolite	Bacteria	ValineUnclassified Bacteroidia	76	47
Fumarate	Unclassified SR1_genera_incertae_sedis	Metabolite	Bacteria	FumarateUnclassified SR1_genera_incertae_sedis	76	46
Serine	Schwartzia	Metabolite	Bacteria	SerineSchwartzia	76	46
Valine	Schwartzia	Metabolite	Bacteria	ValineSchwartzia	76	46
Isopropanol	Schwartzia	Metabolite	Bacteria	IsopropanolSchwartzia	76	46
Serine	Unclassified SR1_genera_incertae_sedis	Metabolite	Bacteria	SerineUnclassified SR1_genera_incertae_sedis	76	46
Valine	Bifidobacterium	Metabolite	Bacteria	ValineBifidobacterium	76	46
Fumarate	Schwartzia	Metabolite	Bacteria	FumarateSchwartzia	76	46
Valine	Unclassified Prevotellaceae	Metabolite	Bacteria	ValineUnclassified Prevotellaceae	76	46
Valine	Unclassified SR1_genera_incertae_sedis	Metabolite	Bacteria	ValineUnclassified SR1_genera_incertae_sedis	76	46
Isopropanol	Unclassified SR1_genera_incertae_sedis	Metabolite	Bacteria	IsopropanolUnclassified SR1_genera_incertae_sedis	76	46
Fumarate	Bifidobacterium	Metabolite	Bacteria	FumarateBifidobacterium	76	46
Valine	Unclassified Ruminococcaceae	Metabolite	Bacteria	ValineUnclassified Ruminococcaceae	76	46
Serine	Unclassified Prevotellaceae	Metabolite	Bacteria	SerineUnclassified Prevotellaceae	76	46
Fumarate	Unclassified Prevotellaceae	Metabolite	Bacteria	FumarateUnclassified Prevotellaceae	76	46
Serine	Bifidobacterium	Metabolite	Bacteria	SerineBifidobacterium	76	46
Fumarate	Unclassified Ruminococcaceae	Metabolite	Bacteria	FumarateUnclassified Ruminococcaceae	76	46
Isopropanol	Unclassified Ruminococcaceae	Metabolite	Bacteria	IsopropanolUnclassified Ruminococcaceae	76	46
Fumarate	Unclassified Streptococcaceae	Metabolite	Bacteria	FumarateUnclassified Streptococcaceae	76	45
Serine	Unclassified Streptococcaceae	Metabolite	Bacteria	SerineUnclassified Streptococcaceae	76	45
Valine	Unclassified Streptococcaceae	Metabolite	Bacteria	ValineUnclassified Streptococcaceae	76	45
Serine	Unclassified Clostridiales_Incertae Sedis XIII	Metabolite	Bacteria	SerineUnclassified Clostridiales_Incertae Sedis XIII	76	45
Fumarate	Unclassified Clostridiales_Incertae Sedis XIII	Metabolite	Bacteria	FumarateUnclassified Clostridiales_Incertae Sedis XIII	76	45
Isopropanol	Unclassified Clostridiales_Incertae Sedis XIII	Metabolite	Bacteria	IsopropanolUnclassified Clostridiales_Incertae Sedis XIII	76	45
Isopropanol	Unclassified Streptococcaceae	Metabolite	Bacteria	IsopropanolUnclassified Streptococcaceae	76	45
Fumarate	Butyrivibrio	Metabolite	Bacteria	FumarateButyrivibrio	76	44
Serine	Unclassified Selenomonadales	Metabolite	Bacteria	SerineUnclassified Selenomonadales	76	44
Isopropanol	Anaeroplasma	Metabolite	Bacteria	IsopropanolAnaeroplasma	76	44
Serine	Anaeroplasma	Metabolite	Bacteria	SerineAnaeroplasma	76	44
Valine	Syntrophococcus	Metabolite	Bacteria	ValineSyntrophococcus	76	44
Isopropanol	Unclassified Selenomonadales	Metabolite	Bacteria	IsopropanolUnclassified Selenomonadales	76	44
Isopropanol	Butyrivibrio	Metabolite	Bacteria	IsopropanolButyrivibrio	76	44
Valine	Butyrivibrio	Metabolite	Bacteria	ValineButyrivibrio	76	44
Fumarate	Unclassified Selenomonadales	Metabolite	Bacteria	FumarateUnclassified Selenomonadales	76	44
Isopropanol	Syntrophococcus	Metabolite	Bacteria	IsopropanolSyntrophococcus	76	44
Serine	Butyrivibrio	Metabolite	Bacteria	SerineButyrivibrio	76	44
Valine	Unclassified Selenomonadales	Metabolite	Bacteria	ValineUnclassified Selenomonadales	76	44
Serine	Syntrophococcus	Metabolite	Bacteria	SerineSyntrophococcus	76	44
Fumarate	Prevotella	Metabolite	Bacteria	FumaratePrevotella	76	41
Serine	Unclassified Bacteroidales	Metabolite	Bacteria	SerineUnclassified Bacteroidales	76	41
Isopropanol	Unclassified Bacteroidales	Metabolite	Bacteria	IsopropanolUnclassified Bacteroidales	76	41
Fumarate	Allisonella	Metabolite	Bacteria	FumarateAllisonella	76	40
Serine	Selenomonas	Metabolite	Bacteria	SerineSelenomonas	76	40
Valine	Selenomonas	Metabolite	Bacteria	ValineSelenomonas	76	40
Isopropanol	Selenomonas	Metabolite	Bacteria	IsopropanolSelenomonas	76	40
Isopropanol	Allisonella	Metabolite	Bacteria	IsopropanolAllisonella	76	40
Fumarate	Selenomonas	Metabolite	Bacteria	FumarateSelenomonas	76	40
Valine	Allisonella	Metabolite	Bacteria	ValineAllisonella	76	40
Serine	Unclassified Bacteroidetes	Metabolite	Bacteria	SerineUnclassified Bacteroidetes	76	39
Fumarate	Clostridium sensu stricto	Metabolite	Bacteria	FumarateClostridium sensu stricto	76	38
Fumarate	Unclassified Actinobacteria	Metabolite	Bacteria	FumarateUnclassified Actinobacteria	76	38
Fumarate	Succinivibrio	Metabolite	Bacteria	FumarateSuccinivibrio	76	38
Isopropanol	Unclassified Firmicutes	Metabolite	Bacteria	IsopropanolUnclassified Firmicutes	76	38
Isopropanol	Succinivibrio	Metabolite	Bacteria	IsopropanolSuccinivibrio	76	38
Fumarate	Unclassified Clostridia	Metabolite	Bacteria	FumarateUnclassified Clostridia	76	38
Isopropanol	Clostridium sensu stricto	Metabolite	Bacteria	IsopropanolClostridium sensu stricto	76	38
Isopropanol	Unclassified Actinobacteria	Metabolite	Bacteria	IsopropanolUnclassified Actinobacteria	76	38
Valine	Unclassified Firmicutes	Metabolite	Bacteria	ValineUnclassified Firmicutes	76	38
Serine	Succinivibrio	Metabolite	Bacteria	SerineSuccinivibrio	76	38
Valine	Unclassified Actinobacteria	Metabolite	Bacteria	ValineUnclassified Actinobacteria	76	38
Valine	Clostridium sensu stricto	Metabolite	Bacteria	ValineClostridium sensu stricto	76	38
Serine	Clostridium sensu stricto	Metabolite	Bacteria	SerineClostridium sensu stricto	76	38
Valine	Succinivibrio	Metabolite	Bacteria	ValineSuccinivibrio	76	38
Serine	Unclassified Actinobacteria	Metabolite	Bacteria	SerineUnclassified Actinobacteria	76	38
Valine	Unclassified Clostridia	Metabolite	Bacteria	ValineUnclassified Clostridia	76	38
Fumarate	Unclassified Clostridiales	Metabolite	Bacteria	FumarateUnclassified Clostridiales	76	36
Serine	Unclassified Clostridiales	Metabolite	Bacteria	SerineUnclassified Clostridiales	76	36
Isopropanol	Unclassified Clostridiales	Metabolite	Bacteria	IsopropanolUnclassified Clostridiales	76	36
Serine	Unclassified Porphyromonadaceae	Metabolite	Bacteria	SerineUnclassified Porphyromonadaceae	76	35
Fumarate	Unclassified Saccharibacteria_genera_incertae_sedis	Metabolite	Bacteria	FumarateUnclassified Saccharibacteria_genera_incertae_sedis	76	35
Valine	Unclassified Deltaproteobacteria	Metabolite	Bacteria	ValineUnclassified Deltaproteobacteria	76	35
Isopropanol	Unclassified Porphyromonadaceae	Metabolite	Bacteria	IsopropanolUnclassified Porphyromonadaceae	76	35
Isopropanol	Unclassified Deltaproteobacteria	Metabolite	Bacteria	IsopropanolUnclassified Deltaproteobacteria	76	35
Valine	Unclassified Saccharibacteria_genera_incertae_sedis	Metabolite	Bacteria	ValineUnclassified Saccharibacteria_genera_incertae_sedis	76	35
Fumarate	Unclassified Porphyromonadaceae	Metabolite	Bacteria	FumarateUnclassified Porphyromonadaceae	76	35
Isopropanol	Unclassified Veillonellaceae	Metabolite	Bacteria	IsopropanolUnclassified Veillonellaceae	76	35
Valine	Unclassified Veillonellaceae	Metabolite	Bacteria	ValineUnclassified Veillonellaceae	76	35
Fumarate	Unclassified Marinilabiliaceae	Metabolite	Bacteria	FumarateUnclassified Marinilabiliaceae	76	33
Serine	Unclassified Anaeroplasmatales	Metabolite	Bacteria	SerineUnclassified Anaeroplasmatales	76	33
Valine	Unclassified Anaeroplasmatales	Metabolite	Bacteria	ValineUnclassified Anaeroplasmatales	76	33
Fumarate	Unclassified Erysipelotrichales	Metabolite	Bacteria	FumarateUnclassified Erysipelotrichales	76	33
Serine	Unclassified Erysipelotrichales	Metabolite	Bacteria	SerineUnclassified Erysipelotrichales	76	33
Isopropanol	Unclassified Anaeroplasmatales	Metabolite	Bacteria	IsopropanolUnclassified Anaeroplasmatales	76	33
Serine	Unclassified Marinilabiliaceae	Metabolite	Bacteria	SerineUnclassified Marinilabiliaceae	76	33
Valine	Unclassified Marinilabiliaceae	Metabolite	Bacteria	ValineUnclassified Marinilabiliaceae	76	33
Fumarate	Unclassified Lentisphaerae	Metabolite	Bacteria	FumarateUnclassified Lentisphaerae	76	31
Serine	Unclassified Proteobacteria	Metabolite	Bacteria	SerineUnclassified Proteobacteria	76	31
Fumarate	Unclassified Proteobacteria	Metabolite	Bacteria	FumarateUnclassified Proteobacteria	76	31
Isopropanol	Unclassified Peptostreptococcaceae	Metabolite	Bacteria	IsopropanolUnclassified Peptostreptococcaceae	76	30
Fumarate	Anaerovorax	Metabolite	Bacteria	FumarateAnaerovorax	76	30
Valine	Unclassified Peptostreptococcaceae	Metabolite	Bacteria	ValineUnclassified Peptostreptococcaceae	76	30
Valine	Anaerovorax	Metabolite	Bacteria	ValineAnaerovorax	76	30
Serine	Anaerovorax	Metabolite	Bacteria	SerineAnaerovorax	76	30
Serine	Unclassified Elusimicrobia	Metabolite	Bacteria	SerineUnclassified Elusimicrobia	76	30
Serine	Unclassified Coriobacteriales	Metabolite	Bacteria	SerineUnclassified Coriobacteriales	76	28
Isopropanol	Ruminococcus	Metabolite	Bacteria	IsopropanolRuminococcus	76	28
Serine	Succinimonas	Metabolite	Bacteria	SerineSuccinimonas	76	26
Fumarate	Succinimonas	Metabolite	Bacteria	FumarateSuccinimonas	76	26
Isopropanol	Succinimonas	Metabolite	Bacteria	IsopropanolSuccinimonas	76	26
Valine	Unclassified Acetobacteraceae	Metabolite	Bacteria	ValineUnclassified Acetobacteraceae	76	25
Isopropanol	Unclassified Acetobacteraceae	Metabolite	Bacteria	IsopropanolUnclassified Acetobacteraceae	76	25
Serine	Unclassified Acetobacteraceae	Metabolite	Bacteria	SerineUnclassified Acetobacteraceae	76	25
Fumarate	Unclassified Synergistaceae	Metabolite	Bacteria	FumarateUnclassified Synergistaceae	76	23
Fumarate	Peptostreptococcus	Metabolite	Bacteria	FumaratePeptostreptococcus	76	22
Isopropanol	Peptostreptococcus	Metabolite	Bacteria	IsopropanolPeptostreptococcus	76	22
Valine	Peptostreptococcus	Metabolite	Bacteria	ValinePeptostreptococcus	76	22
Isopropanol	Unclassified Enterobacteriaceae	Metabolite	Bacteria	IsopropanolUnclassified Enterobacteriaceae	76	19
Valine	Unclassified Enterobacteriaceae	Metabolite	Bacteria	ValineUnclassified Enterobacteriaceae	76	19
Serine	Lampropedia	Metabolite	Bacteria	SerineLampropedia	76	18
Isopropanol	Lampropedia	Metabolite	Bacteria	IsopropanolLampropedia	76	18
Isopropanol	Unclassified Clostridiales_Incertae Sedis XI	Metabolite	Bacteria	IsopropanolUnclassified Clostridiales_Incertae Sedis XI	76	17
Valine	Unclassified Clostridiales_Incertae Sedis XI	Metabolite	Bacteria	ValineUnclassified Clostridiales_Incertae Sedis XI	76	17
Fumarate	Unclassified Eubacteriaceae	Metabolite	Bacteria	FumarateUnclassified Eubacteriaceae	76	17
Isopropanol	Enterococcus	Metabolite	Bacteria	IsopropanolEnterococcus	76	15
Isopropanol	Romboutsia	Metabolite	Bacteria	IsopropanolRomboutsia	76	15
Valine	Enterococcus	Metabolite	Bacteria	ValineEnterococcus	76	15
Valine	Romboutsia	Metabolite	Bacteria	ValineRomboutsia	76	15
Serine	Bavariicoccus	Metabolite	Bacteria	SerineBavariicoccus	76	13
Fumarate	Unclassified Anaerolineaceae	Metabolite	Bacteria	FumarateUnclassified Anaerolineaceae	76	13
Fumarate	Bavariicoccus	Metabolite	Bacteria	FumarateBavariicoccus	76	13
Fumarate	Weissella	Metabolite	Bacteria	FumarateWeissella	76	11
2-Phenylpropionate	Bacteroides	Metabolite	Bacteria	2-PhenylpropionateBacteroides	75	60
Dimethylamine	Bacteroides	Metabolite	Bacteria	DimethylamineBacteroides	75	60
2-Phenylpropionate	Unclassified Anaeroplasmataceae	Metabolite	Bacteria	2-PhenylpropionateUnclassified Anaeroplasmataceae	75	59
2-Phenylpropionate	Unclassified Actinomycetaceae	Metabolite	Bacteria	2-PhenylpropionateUnclassified Actinomycetaceae	75	59
2-Phenylpropionate	Fusobacterium	Metabolite	Bacteria	2-PhenylpropionateFusobacterium	75	59
2-Phenylpropionate	SR1_genera_incertae_sedis	Metabolite	Bacteria	2-PhenylpropionateSR1_genera_incertae_sedis	75	59
2-Phenylpropionate	Unclassified Succinivibrionaceae	Metabolite	Bacteria	2-PhenylpropionateUnclassified Succinivibrionaceae	75	59
2-Phenylpropionate	Megasphaera	Metabolite	Bacteria	2-PhenylpropionateMegasphaera	75	59
2-Phenylpropionate	Pseudobutyrivibrio	Metabolite	Bacteria	2-PhenylpropionatePseudobutyrivibrio	75	59
2-Phenylpropionate	Unclassified Erysipelotrichaceae	Metabolite	Bacteria	2-PhenylpropionateUnclassified Erysipelotrichaceae	75	59
Dimethylamine	Unclassified Actinomycetaceae	Metabolite	Bacteria	DimethylamineUnclassified Actinomycetaceae	75	59
2-Phenylpropionate	Unclassified Bacteria	Metabolite	Bacteria	2-PhenylpropionateUnclassified Bacteria	75	59
2-Phenylpropionate	Treponema	Metabolite	Bacteria	2-PhenylpropionateTreponema	75	59
Dimethylamine	Pseudobutyrivibrio	Metabolite	Bacteria	DimethylaminePseudobutyrivibrio	75	59
Dimethylamine	Unclassified Erysipelotrichaceae	Metabolite	Bacteria	DimethylamineUnclassified Erysipelotrichaceae	75	59
Dimethylamine	Treponema	Metabolite	Bacteria	DimethylamineTreponema	75	59
Dimethylamine	Unclassified Anaeroplasmataceae	Metabolite	Bacteria	DimethylamineUnclassified Anaeroplasmataceae	75	59
Dimethylamine	SR1_genera_incertae_sedis	Metabolite	Bacteria	DimethylamineSR1_genera_incertae_sedis	75	59
Dimethylamine	Unclassified Succinivibrionaceae	Metabolite	Bacteria	DimethylamineUnclassified Succinivibrionaceae	75	59
Dimethylamine	Fusobacterium	Metabolite	Bacteria	DimethylamineFusobacterium	75	59
Dimethylamine	Megasphaera	Metabolite	Bacteria	DimethylamineMegasphaera	75	59
2-Phenylpropionate	Porphyromonas	Metabolite	Bacteria	2-PhenylpropionatePorphyromonas	75	58
2-Phenylpropionate	Unclassified Neisseriaceae	Metabolite	Bacteria	2-PhenylpropionateUnclassified Neisseriaceae	75	58
Dimethylamine	Unclassified Neisseriaceae	Metabolite	Bacteria	DimethylamineUnclassified Neisseriaceae	75	58
2-Phenylpropionate	Unclassified Spirochaetales	Metabolite	Bacteria	2-PhenylpropionateUnclassified Spirochaetales	75	58
Dimethylamine	Unclassified Spirochaetales	Metabolite	Bacteria	DimethylamineUnclassified Spirochaetales	75	58
Dimethylamine	Porphyromonas	Metabolite	Bacteria	DimethylaminePorphyromonas	75	58
2-Phenylpropionate	Unclassified Subdivision5_genera_incertae_sedis	Metabolite	Bacteria	2-PhenylpropionateUnclassified Subdivision5_genera_incertae_sedis	75	57
2-Phenylpropionate	Ruminobacter	Metabolite	Bacteria	2-PhenylpropionateRuminobacter	75	57
2-Phenylpropionate	Asteroleplasma	Metabolite	Bacteria	2-PhenylpropionateAsteroleplasma	75	57
Dimethylamine	Lachnospiracea_incertae_sedis	Metabolite	Bacteria	DimethylamineLachnospiracea_incertae_sedis	75	57
2-Phenylpropionate	Lachnospiracea_incertae_sedis	Metabolite	Bacteria	2-PhenylpropionateLachnospiracea_incertae_sedis	75	57
Dimethylamine	Asteroleplasma	Metabolite	Bacteria	DimethylamineAsteroleplasma	75	57
2-Phenylpropionate	Campylobacter	Metabolite	Bacteria	2-PhenylpropionateCampylobacter	75	56
2-Phenylpropionate	Saccharibacteria_genera_incertae_sedis	Metabolite	Bacteria	2-PhenylpropionateSaccharibacteria_genera_incertae_sedis	75	56
2-Phenylpropionate	Unclassified Spirochaetia	Metabolite	Bacteria	2-PhenylpropionateUnclassified Spirochaetia	75	56
2-Phenylpropionate	Unclassified Mollicutes	Metabolite	Bacteria	2-PhenylpropionateUnclassified Mollicutes	75	56
2-Phenylpropionate	Eisenbergiella	Metabolite	Bacteria	2-PhenylpropionateEisenbergiella	75	56
Dimethylamine	Eisenbergiella	Metabolite	Bacteria	DimethylamineEisenbergiella	75	56
Dimethylamine	Olsenella	Metabolite	Bacteria	DimethylamineOlsenella	75	56
2-Phenylpropionate	Unclassified Bifidobacteriaceae	Metabolite	Bacteria	2-PhenylpropionateUnclassified Bifidobacteriaceae	75	55
Dimethylamine	Unclassified Lachnospiraceae	Metabolite	Bacteria	DimethylamineUnclassified Lachnospiraceae	75	54
Dimethylamine	Unclassified Clostridiaceae 1	Metabolite	Bacteria	DimethylamineUnclassified Clostridiaceae 1	75	54
2-Phenylpropionate	Dialister	Metabolite	Bacteria	2-PhenylpropionateDialister	75	54
Dimethylamine	Unclassified Alphaproteobacteria	Metabolite	Bacteria	DimethylamineUnclassified Alphaproteobacteria	75	54
2-Phenylpropionate	Streptococcus	Metabolite	Bacteria	2-PhenylpropionateStreptococcus	75	54
2-Phenylpropionate	Unclassified Alphaproteobacteria	Metabolite	Bacteria	2-PhenylpropionateUnclassified Alphaproteobacteria	75	54
Dimethylamine	Dialister	Metabolite	Bacteria	DimethylamineDialister	75	54
2-Phenylpropionate	Unclassified Clostridiaceae 1	Metabolite	Bacteria	2-PhenylpropionateUnclassified Clostridiaceae 1	75	54
2-Phenylpropionate	Unclassified Lachnospiraceae	Metabolite	Bacteria	2-PhenylpropionateUnclassified Lachnospiraceae	75	54
Dimethylamine	Unclassified Burkholderiales	Metabolite	Bacteria	DimethylamineUnclassified Burkholderiales	75	53
2-Phenylpropionate	Unclassified Burkholderiales	Metabolite	Bacteria	2-PhenylpropionateUnclassified Burkholderiales	75	53
2-Phenylpropionate	Roseburia	Metabolite	Bacteria	2-PhenylpropionateRoseburia	75	53
Dimethylamine	Roseburia	Metabolite	Bacteria	DimethylamineRoseburia	75	53
2-Phenylpropionate	Anaerovibrio	Metabolite	Bacteria	2-PhenylpropionateAnaerovibrio	75	51
Dimethylamine	Succiniclasticum	Metabolite	Bacteria	DimethylamineSucciniclasticum	75	51
2-Phenylpropionate	Succiniclasticum	Metabolite	Bacteria	2-PhenylpropionateSucciniclasticum	75	51
2-Phenylpropionate	Unclassified Acidaminococcaceae	Metabolite	Bacteria	2-PhenylpropionateUnclassified Acidaminococcaceae	75	50
2-Phenylpropionate	Fibrobacter	Metabolite	Bacteria	2-PhenylpropionateFibrobacter	75	50
Dimethylamine	Catenisphaera	Metabolite	Bacteria	DimethylamineCatenisphaera	75	50
2-Phenylpropionate	Sharpea	Metabolite	Bacteria	2-PhenylpropionateSharpea	75	50
Dimethylamine	Fibrobacter	Metabolite	Bacteria	DimethylamineFibrobacter	75	50
2-Phenylpropionate	Unclassified Desulfobulbaceae	Metabolite	Bacteria	2-PhenylpropionateUnclassified Desulfobulbaceae	75	50
Dimethylamine	Sharpea	Metabolite	Bacteria	DimethylamineSharpea	75	50
Dimethylamine	Acidaminococcus	Metabolite	Bacteria	DimethylamineAcidaminococcus	75	49
Dimethylamine	Unclassified Spirochaetaceae	Metabolite	Bacteria	DimethylamineUnclassified Spirochaetaceae	75	49
2-Phenylpropionate	Acidaminococcus	Metabolite	Bacteria	2-PhenylpropionateAcidaminococcus	75	49
2-Phenylpropionate	Unclassified Spirochaetaceae	Metabolite	Bacteria	2-PhenylpropionateUnclassified Spirochaetaceae	75	49
Dimethylamine	Unclassified Coriobacteriaceae	Metabolite	Bacteria	DimethylamineUnclassified Coriobacteriaceae	75	48
2-Phenylpropionate	Pseudoscardovia	Metabolite	Bacteria	2-PhenylpropionatePseudoscardovia	75	48
Dimethylamine	Pseudoscardovia	Metabolite	Bacteria	DimethylaminePseudoscardovia	75	48
2-Phenylpropionate	Denitrobacterium	Metabolite	Bacteria	2-PhenylpropionateDenitrobacterium	75	48
Dimethylamine	Lactobacillus	Metabolite	Bacteria	DimethylamineLactobacillus	75	48
2-Phenylpropionate	Unclassified Coriobacteriaceae	Metabolite	Bacteria	2-PhenylpropionateUnclassified Coriobacteriaceae	75	48
Dimethylamine	Denitrobacterium	Metabolite	Bacteria	DimethylamineDenitrobacterium	75	48
2-Phenylpropionate	Lactobacillus	Metabolite	Bacteria	2-PhenylpropionateLactobacillus	75	48
Dimethylamine	Unclassified Betaproteobacteria	Metabolite	Bacteria	DimethylamineUnclassified Betaproteobacteria	75	47
Dimethylamine	Unclassified Gammaproteobacteria	Metabolite	Bacteria	DimethylamineUnclassified Gammaproteobacteria	75	47
Dimethylamine	Unclassified Bacteroidia	Metabolite	Bacteria	DimethylamineUnclassified Bacteroidia	75	47
2-Phenylpropionate	Unclassified Gammaproteobacteria	Metabolite	Bacteria	2-PhenylpropionateUnclassified Gammaproteobacteria	75	47
2-Phenylpropionate	Corynebacterium	Metabolite	Bacteria	2-PhenylpropionateCorynebacterium	75	47
2-Phenylpropionate	Unclassified Betaproteobacteria	Metabolite	Bacteria	2-PhenylpropionateUnclassified Betaproteobacteria	75	47
2-Phenylpropionate	Unclassified Bacteroidia	Metabolite	Bacteria	2-PhenylpropionateUnclassified Bacteroidia	75	47
Dimethylamine	Unclassified Ruminococcaceae	Metabolite	Bacteria	DimethylamineUnclassified Ruminococcaceae	75	46
2-Phenylpropionate	Schwartzia	Metabolite	Bacteria	2-PhenylpropionateSchwartzia	75	46
Dimethylamine	Unclassified Prevotellaceae	Metabolite	Bacteria	DimethylamineUnclassified Prevotellaceae	75	46
2-Phenylpropionate	Unclassified SR1_genera_incertae_sedis	Metabolite	Bacteria	2-PhenylpropionateUnclassified SR1_genera_incertae_sedis	75	46
2-Phenylpropionate	Unclassified Prevotellaceae	Metabolite	Bacteria	2-PhenylpropionateUnclassified Prevotellaceae	75	46
2-Phenylpropionate	Unclassified Ruminococcaceae	Metabolite	Bacteria	2-PhenylpropionateUnclassified Ruminococcaceae	75	46
2-Phenylpropionate	Bifidobacterium	Metabolite	Bacteria	2-PhenylpropionateBifidobacterium	75	46
Dimethylamine	Schwartzia	Metabolite	Bacteria	DimethylamineSchwartzia	75	46
Dimethylamine	Unclassified Clostridiales_Incertae Sedis XIII	Metabolite	Bacteria	DimethylamineUnclassified Clostridiales_Incertae Sedis XIII	75	45
2-Phenylpropionate	Unclassified Clostridiales_Incertae Sedis XIII	Metabolite	Bacteria	2-PhenylpropionateUnclassified Clostridiales_Incertae Sedis XIII	75	45
2-Phenylpropionate	Unclassified Streptococcaceae	Metabolite	Bacteria	2-PhenylpropionateUnclassified Streptococcaceae	75	45
Dimethylamine	Unclassified Streptococcaceae	Metabolite	Bacteria	DimethylamineUnclassified Streptococcaceae	75	45
Dimethylamine	Butyrivibrio	Metabolite	Bacteria	DimethylamineButyrivibrio	75	44
Dimethylamine	Anaeroplasma	Metabolite	Bacteria	DimethylamineAnaeroplasma	75	44
2-Phenylpropionate	Syntrophococcus	Metabolite	Bacteria	2-PhenylpropionateSyntrophococcus	75	44
Dimethylamine	Syntrophococcus	Metabolite	Bacteria	DimethylamineSyntrophococcus	75	44
Dimethylamine	Unclassified Selenomonadales	Metabolite	Bacteria	DimethylamineUnclassified Selenomonadales	75	44
2-Phenylpropionate	Anaeroplasma	Metabolite	Bacteria	2-PhenylpropionateAnaeroplasma	75	44
2-Phenylpropionate	Unclassified Selenomonadales	Metabolite	Bacteria	2-PhenylpropionateUnclassified Selenomonadales	75	44
2-Phenylpropionate	Butyrivibrio	Metabolite	Bacteria	2-PhenylpropionateButyrivibrio	75	44
Dimethylamine	Unclassified Bacteroidales	Metabolite	Bacteria	DimethylamineUnclassified Bacteroidales	75	41
2-Phenylpropionate	Prevotella	Metabolite	Bacteria	2-PhenylpropionatePrevotella	75	41
2-Phenylpropionate	Allisonella	Metabolite	Bacteria	2-PhenylpropionateAllisonella	75	40
2-Phenylpropionate	Selenomonas	Metabolite	Bacteria	2-PhenylpropionateSelenomonas	75	40
Dimethylamine	Selenomonas	Metabolite	Bacteria	DimethylamineSelenomonas	75	40
Dimethylamine	Allisonella	Metabolite	Bacteria	DimethylamineAllisonella	75	40
Dimethylamine	Unclassified Bacteroidetes	Metabolite	Bacteria	DimethylamineUnclassified Bacteroidetes	75	39
2-Phenylpropionate	Unclassified Bacteroidetes	Metabolite	Bacteria	2-PhenylpropionateUnclassified Bacteroidetes	75	39
2-Phenylpropionate	Unclassified Firmicutes	Metabolite	Bacteria	2-PhenylpropionateUnclassified Firmicutes	75	38
Dimethylamine	Unclassified Clostridia	Metabolite	Bacteria	DimethylamineUnclassified Clostridia	75	38
2-Phenylpropionate	Clostridium sensu stricto	Metabolite	Bacteria	2-PhenylpropionateClostridium sensu stricto	75	38
2-Phenylpropionate	Unclassified Actinobacteria	Metabolite	Bacteria	2-PhenylpropionateUnclassified Actinobacteria	75	38
Dimethylamine	Unclassified Firmicutes	Metabolite	Bacteria	DimethylamineUnclassified Firmicutes	75	38
Dimethylamine	Succinivibrio	Metabolite	Bacteria	DimethylamineSuccinivibrio	75	38
Dimethylamine	Unclassified Actinobacteria	Metabolite	Bacteria	DimethylamineUnclassified Actinobacteria	75	38
Dimethylamine	Clostridium sensu stricto	Metabolite	Bacteria	DimethylamineClostridium sensu stricto	75	38
Dimethylamine	Unclassified Clostridiales	Metabolite	Bacteria	DimethylamineUnclassified Clostridiales	75	36
2-Phenylpropionate	Unclassified Clostridiales	Metabolite	Bacteria	2-PhenylpropionateUnclassified Clostridiales	75	36
Dimethylamine	Unclassified Porphyromonadaceae	Metabolite	Bacteria	DimethylamineUnclassified Porphyromonadaceae	75	35
Dimethylamine	Unclassified Deltaproteobacteria	Metabolite	Bacteria	DimethylamineUnclassified Deltaproteobacteria	75	35
Dimethylamine	Unclassified Veillonellaceae	Metabolite	Bacteria	DimethylamineUnclassified Veillonellaceae	75	35
2-Phenylpropionate	Unclassified Porphyromonadaceae	Metabolite	Bacteria	2-PhenylpropionateUnclassified Porphyromonadaceae	75	35
Dimethylamine	Unclassified Saccharibacteria_genera_incertae_sedis	Metabolite	Bacteria	DimethylamineUnclassified Saccharibacteria_genera_incertae_sedis	75	35
2-Phenylpropionate	Unclassified Saccharibacteria_genera_incertae_sedis	Metabolite	Bacteria	2-PhenylpropionateUnclassified Saccharibacteria_genera_incertae_sedis	75	35
Dimethylamine	Unclassified Erysipelotrichales	Metabolite	Bacteria	DimethylamineUnclassified Erysipelotrichales	75	33
Dimethylamine	Unclassified Anaeroplasmatales	Metabolite	Bacteria	DimethylamineUnclassified Anaeroplasmatales	75	33
Dimethylamine	Unclassified Marinilabiliaceae	Metabolite	Bacteria	DimethylamineUnclassified Marinilabiliaceae	75	33
2-Phenylpropionate	Unclassified Anaeroplasmatales	Metabolite	Bacteria	2-PhenylpropionateUnclassified Anaeroplasmatales	75	33
Dimethylamine	Unclassified Proteobacteria	Metabolite	Bacteria	DimethylamineUnclassified Proteobacteria	75	31
2-Phenylpropionate	Unclassified Lentisphaerae	Metabolite	Bacteria	2-PhenylpropionateUnclassified Lentisphaerae	75	31
Dimethylamine	Unclassified Lentisphaerae	Metabolite	Bacteria	DimethylamineUnclassified Lentisphaerae	75	31
2-Phenylpropionate	Anaerovorax	Metabolite	Bacteria	2-PhenylpropionateAnaerovorax	75	30
Dimethylamine	Unclassified Peptostreptococcaceae	Metabolite	Bacteria	DimethylamineUnclassified Peptostreptococcaceae	75	30
Dimethylamine	Unclassified Coriobacteriales	Metabolite	Bacteria	DimethylamineUnclassified Coriobacteriales	75	28
2-Phenylpropionate	Unclassified Acetobacteraceae	Metabolite	Bacteria	2-PhenylpropionateUnclassified Acetobacteraceae	75	25
Dimethylamine	Unclassified Acetobacteraceae	Metabolite	Bacteria	DimethylamineUnclassified Acetobacteraceae	75	25
2-Phenylpropionate	Unclassified Synergistaceae	Metabolite	Bacteria	2-PhenylpropionateUnclassified Synergistaceae	75	23
Dimethylamine	Unclassified Synergistaceae	Metabolite	Bacteria	DimethylamineUnclassified Synergistaceae	75	23
Dimethylamine	Peptostreptococcus	Metabolite	Bacteria	DimethylaminePeptostreptococcus	75	22
Dimethylamine	Anaerofustis	Metabolite	Bacteria	DimethylamineAnaerofustis	75	20
Dimethylamine	Unclassified Enterobacteriaceae	Metabolite	Bacteria	DimethylamineUnclassified Enterobacteriaceae	75	19
Dimethylamine	Unclassified Clostridiales_Incertae Sedis XI	Metabolite	Bacteria	DimethylamineUnclassified Clostridiales_Incertae Sedis XI	75	17
Dimethylamine	Enterococcus	Metabolite	Bacteria	DimethylamineEnterococcus	75	15
Dimethylamine	Romboutsia	Metabolite	Bacteria	DimethylamineRomboutsia	75	15
2-Phenylpropionate	Unclassified Anaerolineaceae	Metabolite	Bacteria	2-PhenylpropionateUnclassified Anaerolineaceae	75	13
Dimethylamine	Unclassified Anaerolineaceae	Metabolite	Bacteria	DimethylamineUnclassified Anaerolineaceae	75	13
2-Phenylpropionate	Unclassified Actinomycetales	Metabolite	Bacteria	2-PhenylpropionateUnclassified Actinomycetales	75	4
3-Phenylpropionate	Bacteroides	Metabolite	Bacteria	3-PhenylpropionateBacteroides	74	60
Acetone	Bacteroides	Metabolite	Bacteria	AcetoneBacteroides	74	60
Benzoate	Bacteroides	Metabolite	Bacteria	BenzoateBacteroides	74	60
Carnitine	Bacteroides	Metabolite	Bacteria	CarnitineBacteroides	74	60
Ethanol	Bacteroides	Metabolite	Bacteria	EthanolBacteroides	74	60
Imidazole	Bacteroides	Metabolite	Bacteria	ImidazoleBacteroides	74	60
Nicotinate	Bacteroides	Metabolite	Bacteria	NicotinateBacteroides	74	60
Allantoin	Bacteroides	Metabolite	Bacteria	AllantoinBacteroides	74	60
3-Phenylpropionate	Unclassified Anaeroplasmataceae	Metabolite	Bacteria	3-PhenylpropionateUnclassified Anaeroplasmataceae	74	59
3-Phenylpropionate	Unclassified Actinomycetaceae	Metabolite	Bacteria	3-PhenylpropionateUnclassified Actinomycetaceae	74	59
3-Phenylpropionate	Fusobacterium	Metabolite	Bacteria	3-PhenylpropionateFusobacterium	74	59
3-Phenylpropionate	SR1_genera_incertae_sedis	Metabolite	Bacteria	3-PhenylpropionateSR1_genera_incertae_sedis	74	59
3-Phenylpropionate	Unclassified Succinivibrionaceae	Metabolite	Bacteria	3-PhenylpropionateUnclassified Succinivibrionaceae	74	59
Acetone	Unclassified Anaeroplasmataceae	Metabolite	Bacteria	AcetoneUnclassified Anaeroplasmataceae	74	59
Acetone	Unclassified Actinomycetaceae	Metabolite	Bacteria	AcetoneUnclassified Actinomycetaceae	74	59
Acetone	Fusobacterium	Metabolite	Bacteria	AcetoneFusobacterium	74	59
Acetone	SR1_genera_incertae_sedis	Metabolite	Bacteria	AcetoneSR1_genera_incertae_sedis	74	59
Acetone	Unclassified Succinivibrionaceae	Metabolite	Bacteria	AcetoneUnclassified Succinivibrionaceae	74	59
Benzoate	Unclassified Anaeroplasmataceae	Metabolite	Bacteria	BenzoateUnclassified Anaeroplasmataceae	74	59
Benzoate	Unclassified Actinomycetaceae	Metabolite	Bacteria	BenzoateUnclassified Actinomycetaceae	74	59
Benzoate	Fusobacterium	Metabolite	Bacteria	BenzoateFusobacterium	74	59
Benzoate	SR1_genera_incertae_sedis	Metabolite	Bacteria	BenzoateSR1_genera_incertae_sedis	74	59
Benzoate	Unclassified Succinivibrionaceae	Metabolite	Bacteria	BenzoateUnclassified Succinivibrionaceae	74	59
Carnitine	Unclassified Anaeroplasmataceae	Metabolite	Bacteria	CarnitineUnclassified Anaeroplasmataceae	74	59
Carnitine	Unclassified Actinomycetaceae	Metabolite	Bacteria	CarnitineUnclassified Actinomycetaceae	74	59
Carnitine	Fusobacterium	Metabolite	Bacteria	CarnitineFusobacterium	74	59
Carnitine	SR1_genera_incertae_sedis	Metabolite	Bacteria	CarnitineSR1_genera_incertae_sedis	74	59
Carnitine	Unclassified Succinivibrionaceae	Metabolite	Bacteria	CarnitineUnclassified Succinivibrionaceae	74	59
Ethanol	Unclassified Anaeroplasmataceae	Metabolite	Bacteria	EthanolUnclassified Anaeroplasmataceae	74	59
Ethanol	Unclassified Actinomycetaceae	Metabolite	Bacteria	EthanolUnclassified Actinomycetaceae	74	59
Ethanol	Fusobacterium	Metabolite	Bacteria	EthanolFusobacterium	74	59
Ethanol	SR1_genera_incertae_sedis	Metabolite	Bacteria	EthanolSR1_genera_incertae_sedis	74	59
Ethanol	Unclassified Succinivibrionaceae	Metabolite	Bacteria	EthanolUnclassified Succinivibrionaceae	74	59
Imidazole	Unclassified Anaeroplasmataceae	Metabolite	Bacteria	ImidazoleUnclassified Anaeroplasmataceae	74	59
Imidazole	Unclassified Actinomycetaceae	Metabolite	Bacteria	ImidazoleUnclassified Actinomycetaceae	74	59
Imidazole	Fusobacterium	Metabolite	Bacteria	ImidazoleFusobacterium	74	59
Imidazole	SR1_genera_incertae_sedis	Metabolite	Bacteria	ImidazoleSR1_genera_incertae_sedis	74	59
Imidazole	Unclassified Succinivibrionaceae	Metabolite	Bacteria	ImidazoleUnclassified Succinivibrionaceae	74	59
Nicotinate	Unclassified Anaeroplasmataceae	Metabolite	Bacteria	NicotinateUnclassified Anaeroplasmataceae	74	59
Nicotinate	Unclassified Actinomycetaceae	Metabolite	Bacteria	NicotinateUnclassified Actinomycetaceae	74	59
Nicotinate	Fusobacterium	Metabolite	Bacteria	NicotinateFusobacterium	74	59
Nicotinate	SR1_genera_incertae_sedis	Metabolite	Bacteria	NicotinateSR1_genera_incertae_sedis	74	59
Nicotinate	Unclassified Succinivibrionaceae	Metabolite	Bacteria	NicotinateUnclassified Succinivibrionaceae	74	59
Carnitine	Megasphaera	Metabolite	Bacteria	CarnitineMegasphaera	74	59
3-Phenylpropionate	Megasphaera	Metabolite	Bacteria	3-PhenylpropionateMegasphaera	74	59
3-Phenylpropionate	Pseudobutyrivibrio	Metabolite	Bacteria	3-PhenylpropionatePseudobutyrivibrio	74	59
3-Phenylpropionate	Unclassified Erysipelotrichaceae	Metabolite	Bacteria	3-PhenylpropionateUnclassified Erysipelotrichaceae	74	59
Acetone	Megasphaera	Metabolite	Bacteria	AcetoneMegasphaera	74	59
Acetone	Unclassified Erysipelotrichaceae	Metabolite	Bacteria	AcetoneUnclassified Erysipelotrichaceae	74	59
Benzoate	Megasphaera	Metabolite	Bacteria	BenzoateMegasphaera	74	59
Benzoate	Unclassified Erysipelotrichaceae	Metabolite	Bacteria	BenzoateUnclassified Erysipelotrichaceae	74	59
Ethanol	Megasphaera	Metabolite	Bacteria	EthanolMegasphaera	74	59
Ethanol	Pseudobutyrivibrio	Metabolite	Bacteria	EthanolPseudobutyrivibrio	74	59
Ethanol	Unclassified Erysipelotrichaceae	Metabolite	Bacteria	EthanolUnclassified Erysipelotrichaceae	74	59
Imidazole	Megasphaera	Metabolite	Bacteria	ImidazoleMegasphaera	74	59
Imidazole	Unclassified Erysipelotrichaceae	Metabolite	Bacteria	ImidazoleUnclassified Erysipelotrichaceae	74	59
Nicotinate	Megasphaera	Metabolite	Bacteria	NicotinateMegasphaera	74	59
Nicotinate	Pseudobutyrivibrio	Metabolite	Bacteria	NicotinatePseudobutyrivibrio	74	59
Nicotinate	Unclassified Erysipelotrichaceae	Metabolite	Bacteria	NicotinateUnclassified Erysipelotrichaceae	74	59
Benzoate	Pseudobutyrivibrio	Metabolite	Bacteria	BenzoatePseudobutyrivibrio	74	59
Imidazole	Pseudobutyrivibrio	Metabolite	Bacteria	ImidazolePseudobutyrivibrio	74	59
Carnitine	Unclassified Erysipelotrichaceae	Metabolite	Bacteria	CarnitineUnclassified Erysipelotrichaceae	74	59
Acetone	Pseudobutyrivibrio	Metabolite	Bacteria	AcetonePseudobutyrivibrio	74	59
Carnitine	Pseudobutyrivibrio	Metabolite	Bacteria	CarnitinePseudobutyrivibrio	74	59
Imidazole	Treponema	Metabolite	Bacteria	ImidazoleTreponema	74	59
Ethanol	Unclassified Bacteria	Metabolite	Bacteria	EthanolUnclassified Bacteria	74	59
3-Phenylpropionate	Unclassified Bacteria	Metabolite	Bacteria	3-PhenylpropionateUnclassified Bacteria	74	59
Carnitine	Unclassified Bacteria	Metabolite	Bacteria	CarnitineUnclassified Bacteria	74	59
Imidazole	Unclassified Bacteria	Metabolite	Bacteria	ImidazoleUnclassified Bacteria	74	59
Nicotinate	Unclassified Bacteria	Metabolite	Bacteria	NicotinateUnclassified Bacteria	74	59
Benzoate	Unclassified Bacteria	Metabolite	Bacteria	BenzoateUnclassified Bacteria	74	59
Acetone	Unclassified Bacteria	Metabolite	Bacteria	AcetoneUnclassified Bacteria	74	59
Ethanol	Treponema	Metabolite	Bacteria	EthanolTreponema	74	59
3-Phenylpropionate	Treponema	Metabolite	Bacteria	3-PhenylpropionateTreponema	74	59
Carnitine	Treponema	Metabolite	Bacteria	CarnitineTreponema	74	59
Nicotinate	Treponema	Metabolite	Bacteria	NicotinateTreponema	74	59
Benzoate	Treponema	Metabolite	Bacteria	BenzoateTreponema	74	59
Allantoin	Unclassified Anaeroplasmataceae	Metabolite	Bacteria	AllantoinUnclassified Anaeroplasmataceae	74	59
Acetone	Treponema	Metabolite	Bacteria	AcetoneTreponema	74	59
Allantoin	Megasphaera	Metabolite	Bacteria	AllantoinMegasphaera	74	59
Allantoin	Unclassified Actinomycetaceae	Metabolite	Bacteria	AllantoinUnclassified Actinomycetaceae	74	59
Allantoin	SR1_genera_incertae_sedis	Metabolite	Bacteria	AllantoinSR1_genera_incertae_sedis	74	59
Allantoin	Unclassified Erysipelotrichaceae	Metabolite	Bacteria	AllantoinUnclassified Erysipelotrichaceae	74	59
Allantoin	Unclassified Succinivibrionaceae	Metabolite	Bacteria	AllantoinUnclassified Succinivibrionaceae	74	59
Allantoin	Pseudobutyrivibrio	Metabolite	Bacteria	AllantoinPseudobutyrivibrio	74	59
Allantoin	Unclassified Bacteria	Metabolite	Bacteria	AllantoinUnclassified Bacteria	74	59
Allantoin	Fusobacterium	Metabolite	Bacteria	AllantoinFusobacterium	74	59
Allantoin	Treponema	Metabolite	Bacteria	AllantoinTreponema	74	59
3-Phenylpropionate	Porphyromonas	Metabolite	Bacteria	3-PhenylpropionatePorphyromonas	74	58
Acetone	Porphyromonas	Metabolite	Bacteria	AcetonePorphyromonas	74	58
Benzoate	Porphyromonas	Metabolite	Bacteria	BenzoatePorphyromonas	74	58
Carnitine	Porphyromonas	Metabolite	Bacteria	CarnitinePorphyromonas	74	58
Ethanol	Porphyromonas	Metabolite	Bacteria	EthanolPorphyromonas	74	58
Imidazole	Porphyromonas	Metabolite	Bacteria	ImidazolePorphyromonas	74	58
Nicotinate	Porphyromonas	Metabolite	Bacteria	NicotinatePorphyromonas	74	58
3-Phenylpropionate	Unclassified Neisseriaceae	Metabolite	Bacteria	3-PhenylpropionateUnclassified Neisseriaceae	74	58
Imidazole	Unclassified Neisseriaceae	Metabolite	Bacteria	ImidazoleUnclassified Neisseriaceae	74	58
Imidazole	Unclassified Spirochaetales	Metabolite	Bacteria	ImidazoleUnclassified Spirochaetales	74	58
Allantoin	Porphyromonas	Metabolite	Bacteria	AllantoinPorphyromonas	74	58
Nicotinate	Unclassified Neisseriaceae	Metabolite	Bacteria	NicotinateUnclassified Neisseriaceae	74	58
Nicotinate	Unclassified Spirochaetales	Metabolite	Bacteria	NicotinateUnclassified Spirochaetales	74	58
Benzoate	Unclassified Spirochaetales	Metabolite	Bacteria	BenzoateUnclassified Spirochaetales	74	58
Ethanol	Unclassified Neisseriaceae	Metabolite	Bacteria	EthanolUnclassified Neisseriaceae	74	58
3-Phenylpropionate	Unclassified Spirochaetales	Metabolite	Bacteria	3-PhenylpropionateUnclassified Spirochaetales	74	58
Carnitine	Unclassified Spirochaetales	Metabolite	Bacteria	CarnitineUnclassified Spirochaetales	74	58
Acetone	Unclassified Spirochaetales	Metabolite	Bacteria	AcetoneUnclassified Spirochaetales	74	58
Allantoin	Unclassified Neisseriaceae	Metabolite	Bacteria	AllantoinUnclassified Neisseriaceae	74	58
Ethanol	Unclassified Spirochaetales	Metabolite	Bacteria	EthanolUnclassified Spirochaetales	74	58
Allantoin	Unclassified Spirochaetales	Metabolite	Bacteria	AllantoinUnclassified Spirochaetales	74	58
Acetone	Unclassified Neisseriaceae	Metabolite	Bacteria	AcetoneUnclassified Neisseriaceae	74	58
Benzoate	Unclassified Neisseriaceae	Metabolite	Bacteria	BenzoateUnclassified Neisseriaceae	74	58
Carnitine	Unclassified Neisseriaceae	Metabolite	Bacteria	CarnitineUnclassified Neisseriaceae	74	58
3-Phenylpropionate	Unclassified Subdivision5_genera_incertae_sedis	Metabolite	Bacteria	3-PhenylpropionateUnclassified Subdivision5_genera_incertae_sedis	74	57
Acetone	Unclassified Subdivision5_genera_incertae_sedis	Metabolite	Bacteria	AcetoneUnclassified Subdivision5_genera_incertae_sedis	74	57
Benzoate	Unclassified Subdivision5_genera_incertae_sedis	Metabolite	Bacteria	BenzoateUnclassified Subdivision5_genera_incertae_sedis	74	57
Carnitine	Unclassified Subdivision5_genera_incertae_sedis	Metabolite	Bacteria	CarnitineUnclassified Subdivision5_genera_incertae_sedis	74	57
Ethanol	Unclassified Subdivision5_genera_incertae_sedis	Metabolite	Bacteria	EthanolUnclassified Subdivision5_genera_incertae_sedis	74	57
Imidazole	Unclassified Subdivision5_genera_incertae_sedis	Metabolite	Bacteria	ImidazoleUnclassified Subdivision5_genera_incertae_sedis	74	57
Nicotinate	Unclassified Subdivision5_genera_incertae_sedis	Metabolite	Bacteria	NicotinateUnclassified Subdivision5_genera_incertae_sedis	74	57
Benzoate	Lachnospiracea_incertae_sedis	Metabolite	Bacteria	BenzoateLachnospiracea_incertae_sedis	74	57
3-Phenylpropionate	Ruminobacter	Metabolite	Bacteria	3-PhenylpropionateRuminobacter	74	57
Benzoate	Ruminobacter	Metabolite	Bacteria	BenzoateRuminobacter	74	57
Imidazole	Ruminobacter	Metabolite	Bacteria	ImidazoleRuminobacter	74	57
Nicotinate	Ruminobacter	Metabolite	Bacteria	NicotinateRuminobacter	74	57
Ethanol	Lachnospiracea_incertae_sedis	Metabolite	Bacteria	EthanolLachnospiracea_incertae_sedis	74	57
Imidazole	Lachnospiracea_incertae_sedis	Metabolite	Bacteria	ImidazoleLachnospiracea_incertae_sedis	74	57
Ethanol	Ruminobacter	Metabolite	Bacteria	EthanolRuminobacter	74	57
Acetone	Lachnospiracea_incertae_sedis	Metabolite	Bacteria	AcetoneLachnospiracea_incertae_sedis	74	57
Allantoin	Asteroleplasma	Metabolite	Bacteria	AllantoinAsteroleplasma	74	57
Acetone	Ruminobacter	Metabolite	Bacteria	AcetoneRuminobacter	74	57
Allantoin	Ruminobacter	Metabolite	Bacteria	AllantoinRuminobacter	74	57
Nicotinate	Lachnospiracea_incertae_sedis	Metabolite	Bacteria	NicotinateLachnospiracea_incertae_sedis	74	57
Carnitine	Ruminobacter	Metabolite	Bacteria	CarnitineRuminobacter	74	57
Carnitine	Lachnospiracea_incertae_sedis	Metabolite	Bacteria	CarnitineLachnospiracea_incertae_sedis	74	57
Nicotinate	Asteroleplasma	Metabolite	Bacteria	NicotinateAsteroleplasma	74	57
Benzoate	Asteroleplasma	Metabolite	Bacteria	BenzoateAsteroleplasma	74	57
3-Phenylpropionate	Asteroleplasma	Metabolite	Bacteria	3-PhenylpropionateAsteroleplasma	74	57
Imidazole	Asteroleplasma	Metabolite	Bacteria	ImidazoleAsteroleplasma	74	57
Ethanol	Asteroleplasma	Metabolite	Bacteria	EthanolAsteroleplasma	74	57
Acetone	Asteroleplasma	Metabolite	Bacteria	AcetoneAsteroleplasma	74	57
Allantoin	Lachnospiracea_incertae_sedis	Metabolite	Bacteria	AllantoinLachnospiracea_incertae_sedis	74	57
Carnitine	Asteroleplasma	Metabolite	Bacteria	CarnitineAsteroleplasma	74	57
3-Phenylpropionate	Lachnospiracea_incertae_sedis	Metabolite	Bacteria	3-PhenylpropionateLachnospiracea_incertae_sedis	74	57
Allantoin	Unclassified Subdivision5_genera_incertae_sedis	Metabolite	Bacteria	AllantoinUnclassified Subdivision5_genera_incertae_sedis	74	57
3-Phenylpropionate	Campylobacter	Metabolite	Bacteria	3-PhenylpropionateCampylobacter	74	56
Acetone	Campylobacter	Metabolite	Bacteria	AcetoneCampylobacter	74	56
Benzoate	Campylobacter	Metabolite	Bacteria	BenzoateCampylobacter	74	56
Carnitine	Campylobacter	Metabolite	Bacteria	CarnitineCampylobacter	74	56
Ethanol	Campylobacter	Metabolite	Bacteria	EthanolCampylobacter	74	56
Imidazole	Campylobacter	Metabolite	Bacteria	ImidazoleCampylobacter	74	56
Nicotinate	Campylobacter	Metabolite	Bacteria	NicotinateCampylobacter	74	56
3-Phenylpropionate	Saccharibacteria_genera_incertae_sedis	Metabolite	Bacteria	3-PhenylpropionateSaccharibacteria_genera_incertae_sedis	74	56
3-Phenylpropionate	Unclassified Spirochaetia	Metabolite	Bacteria	3-PhenylpropionateUnclassified Spirochaetia	74	56
Acetone	Saccharibacteria_genera_incertae_sedis	Metabolite	Bacteria	AcetoneSaccharibacteria_genera_incertae_sedis	74	56
Acetone	Unclassified Spirochaetia	Metabolite	Bacteria	AcetoneUnclassified Spirochaetia	74	56
Benzoate	Saccharibacteria_genera_incertae_sedis	Metabolite	Bacteria	BenzoateSaccharibacteria_genera_incertae_sedis	74	56
Benzoate	Unclassified Spirochaetia	Metabolite	Bacteria	BenzoateUnclassified Spirochaetia	74	56
Carnitine	Saccharibacteria_genera_incertae_sedis	Metabolite	Bacteria	CarnitineSaccharibacteria_genera_incertae_sedis	74	56
Carnitine	Unclassified Spirochaetia	Metabolite	Bacteria	CarnitineUnclassified Spirochaetia	74	56
Ethanol	Saccharibacteria_genera_incertae_sedis	Metabolite	Bacteria	EthanolSaccharibacteria_genera_incertae_sedis	74	56
Ethanol	Unclassified Spirochaetia	Metabolite	Bacteria	EthanolUnclassified Spirochaetia	74	56
Imidazole	Saccharibacteria_genera_incertae_sedis	Metabolite	Bacteria	ImidazoleSaccharibacteria_genera_incertae_sedis	74	56
Imidazole	Unclassified Spirochaetia	Metabolite	Bacteria	ImidazoleUnclassified Spirochaetia	74	56
Nicotinate	Saccharibacteria_genera_incertae_sedis	Metabolite	Bacteria	NicotinateSaccharibacteria_genera_incertae_sedis	74	56
Nicotinate	Unclassified Spirochaetia	Metabolite	Bacteria	NicotinateUnclassified Spirochaetia	74	56
3-Phenylpropionate	Eisenbergiella	Metabolite	Bacteria	3-PhenylpropionateEisenbergiella	74	56
3-Phenylpropionate	Unclassified Mollicutes	Metabolite	Bacteria	3-PhenylpropionateUnclassified Mollicutes	74	56
Benzoate	Eisenbergiella	Metabolite	Bacteria	BenzoateEisenbergiella	74	56
Benzoate	Unclassified Mollicutes	Metabolite	Bacteria	BenzoateUnclassified Mollicutes	74	56
Imidazole	Eisenbergiella	Metabolite	Bacteria	ImidazoleEisenbergiella	74	56
Imidazole	Unclassified Mollicutes	Metabolite	Bacteria	ImidazoleUnclassified Mollicutes	74	56
Nicotinate	Eisenbergiella	Metabolite	Bacteria	NicotinateEisenbergiella	74	56
Nicotinate	Unclassified Mollicutes	Metabolite	Bacteria	NicotinateUnclassified Mollicutes	74	56
Ethanol	Unclassified Mollicutes	Metabolite	Bacteria	EthanolUnclassified Mollicutes	74	56
Acetone	Olsenella	Metabolite	Bacteria	AcetoneOlsenella	74	56
Acetone	Unclassified Mollicutes	Metabolite	Bacteria	AcetoneUnclassified Mollicutes	74	56
Carnitine	Unclassified Mollicutes	Metabolite	Bacteria	CarnitineUnclassified Mollicutes	74	56
Benzoate	Olsenella	Metabolite	Bacteria	BenzoateOlsenella	74	56
Ethanol	Eisenbergiella	Metabolite	Bacteria	EthanolEisenbergiella	74	56
Allantoin	Olsenella	Metabolite	Bacteria	AllantoinOlsenella	74	56
Acetone	Eisenbergiella	Metabolite	Bacteria	AcetoneEisenbergiella	74	56
Carnitine	Olsenella	Metabolite	Bacteria	CarnitineOlsenella	74	56
Imidazole	Olsenella	Metabolite	Bacteria	ImidazoleOlsenella	74	56
Allantoin	Campylobacter	Metabolite	Bacteria	AllantoinCampylobacter	74	56
Allantoin	Saccharibacteria_genera_incertae_sedis	Metabolite	Bacteria	AllantoinSaccharibacteria_genera_incertae_sedis	74	56
Allantoin	Unclassified Spirochaetia	Metabolite	Bacteria	AllantoinUnclassified Spirochaetia	74	56
Ethanol	Olsenella	Metabolite	Bacteria	EthanolOlsenella	74	56
Carnitine	Eisenbergiella	Metabolite	Bacteria	CarnitineEisenbergiella	74	56
Allantoin	Unclassified Mollicutes	Metabolite	Bacteria	AllantoinUnclassified Mollicutes	74	56
Nicotinate	Olsenella	Metabolite	Bacteria	NicotinateOlsenella	74	56
Allantoin	Eisenbergiella	Metabolite	Bacteria	AllantoinEisenbergiella	74	56
3-Phenylpropionate	Unclassified Bifidobacteriaceae	Metabolite	Bacteria	3-PhenylpropionateUnclassified Bifidobacteriaceae	74	55
Benzoate	Unclassified Bifidobacteriaceae	Metabolite	Bacteria	BenzoateUnclassified Bifidobacteriaceae	74	55
Carnitine	Unclassified Bifidobacteriaceae	Metabolite	Bacteria	CarnitineUnclassified Bifidobacteriaceae	74	55
Ethanol	Unclassified Bifidobacteriaceae	Metabolite	Bacteria	EthanolUnclassified Bifidobacteriaceae	74	55
Imidazole	Unclassified Bifidobacteriaceae	Metabolite	Bacteria	ImidazoleUnclassified Bifidobacteriaceae	74	55
Nicotinate	Unclassified Bifidobacteriaceae	Metabolite	Bacteria	NicotinateUnclassified Bifidobacteriaceae	74	55
Acetone	Unclassified Bifidobacteriaceae	Metabolite	Bacteria	AcetoneUnclassified Bifidobacteriaceae	74	55
Carnitine	Dialister	Metabolite	Bacteria	CarnitineDialister	74	54
3-Phenylpropionate	Dialister	Metabolite	Bacteria	3-PhenylpropionateDialister	74	54
Benzoate	Dialister	Metabolite	Bacteria	BenzoateDialister	74	54
Imidazole	Dialister	Metabolite	Bacteria	ImidazoleDialister	74	54
Nicotinate	Dialister	Metabolite	Bacteria	NicotinateDialister	74	54
Nicotinate	Unclassified Alphaproteobacteria	Metabolite	Bacteria	NicotinateUnclassified Alphaproteobacteria	74	54
Carnitine	Unclassified Clostridiaceae 1	Metabolite	Bacteria	CarnitineUnclassified Clostridiaceae 1	74	54
Ethanol	Dialister	Metabolite	Bacteria	EthanolDialister	74	54
Ethanol	Unclassified Lachnospiraceae	Metabolite	Bacteria	EthanolUnclassified Lachnospiraceae	74	54
3-Phenylpropionate	Unclassified Clostridiaceae 1	Metabolite	Bacteria	3-PhenylpropionateUnclassified Clostridiaceae 1	74	54
Acetone	Unclassified Lachnospiraceae	Metabolite	Bacteria	AcetoneUnclassified Lachnospiraceae	74	54
Allantoin	Unclassified Clostridiaceae 1	Metabolite	Bacteria	AllantoinUnclassified Clostridiaceae 1	74	54
Allantoin	Unclassified Alphaproteobacteria	Metabolite	Bacteria	AllantoinUnclassified Alphaproteobacteria	74	54
Imidazole	Unclassified Alphaproteobacteria	Metabolite	Bacteria	ImidazoleUnclassified Alphaproteobacteria	74	54
Acetone	Dialister	Metabolite	Bacteria	AcetoneDialister	74	54
Carnitine	Streptococcus	Metabolite	Bacteria	CarnitineStreptococcus	74	54
Nicotinate	Unclassified Clostridiaceae 1	Metabolite	Bacteria	NicotinateUnclassified Clostridiaceae 1	74	54
Nicotinate	Unclassified Lachnospiraceae	Metabolite	Bacteria	NicotinateUnclassified Lachnospiraceae	74	54
Nicotinate	Streptococcus	Metabolite	Bacteria	NicotinateStreptococcus	74	54
Benzoate	Streptococcus	Metabolite	Bacteria	BenzoateStreptococcus	74	54
Imidazole	Streptococcus	Metabolite	Bacteria	ImidazoleStreptococcus	74	54
Carnitine	Unclassified Alphaproteobacteria	Metabolite	Bacteria	CarnitineUnclassified Alphaproteobacteria	74	54
Carnitine	Unclassified Lachnospiraceae	Metabolite	Bacteria	CarnitineUnclassified Lachnospiraceae	74	54
3-Phenylpropionate	Streptococcus	Metabolite	Bacteria	3-PhenylpropionateStreptococcus	74	54
Ethanol	Streptococcus	Metabolite	Bacteria	EthanolStreptococcus	74	54
Acetone	Streptococcus	Metabolite	Bacteria	AcetoneStreptococcus	74	54
Allantoin	Unclassified Lachnospiraceae	Metabolite	Bacteria	AllantoinUnclassified Lachnospiraceae	74	54
Acetone	Unclassified Clostridiaceae 1	Metabolite	Bacteria	AcetoneUnclassified Clostridiaceae 1	74	54
Benzoate	Unclassified Clostridiaceae 1	Metabolite	Bacteria	BenzoateUnclassified Clostridiaceae 1	74	54
3-Phenylpropionate	Unclassified Lachnospiraceae	Metabolite	Bacteria	3-PhenylpropionateUnclassified Lachnospiraceae	74	54
Benzoate	Unclassified Lachnospiraceae	Metabolite	Bacteria	BenzoateUnclassified Lachnospiraceae	74	54
Acetone	Unclassified Alphaproteobacteria	Metabolite	Bacteria	AcetoneUnclassified Alphaproteobacteria	74	54
Ethanol	Unclassified Clostridiaceae 1	Metabolite	Bacteria	EthanolUnclassified Clostridiaceae 1	74	54
3-Phenylpropionate	Unclassified Alphaproteobacteria	Metabolite	Bacteria	3-PhenylpropionateUnclassified Alphaproteobacteria	74	54
Benzoate	Unclassified Alphaproteobacteria	Metabolite	Bacteria	BenzoateUnclassified Alphaproteobacteria	74	54
Allantoin	Streptococcus	Metabolite	Bacteria	AllantoinStreptococcus	74	54
Imidazole	Unclassified Clostridiaceae 1	Metabolite	Bacteria	ImidazoleUnclassified Clostridiaceae 1	74	54
Imidazole	Unclassified Lachnospiraceae	Metabolite	Bacteria	ImidazoleUnclassified Lachnospiraceae	74	54
Acetone	Roseburia	Metabolite	Bacteria	AcetoneRoseburia	74	53
3-Phenylpropionate	Unclassified Burkholderiales	Metabolite	Bacteria	3-PhenylpropionateUnclassified Burkholderiales	74	53
Carnitine	Unclassified Burkholderiales	Metabolite	Bacteria	CarnitineUnclassified Burkholderiales	74	53
Ethanol	Roseburia	Metabolite	Bacteria	EthanolRoseburia	74	53
Imidazole	Unclassified Burkholderiales	Metabolite	Bacteria	ImidazoleUnclassified Burkholderiales	74	53
Benzoate	Roseburia	Metabolite	Bacteria	BenzoateRoseburia	74	53
Nicotinate	Unclassified Burkholderiales	Metabolite	Bacteria	NicotinateUnclassified Burkholderiales	74	53
Benzoate	Unclassified Burkholderiales	Metabolite	Bacteria	BenzoateUnclassified Burkholderiales	74	53
Ethanol	Unclassified Burkholderiales	Metabolite	Bacteria	EthanolUnclassified Burkholderiales	74	53
Allantoin	Roseburia	Metabolite	Bacteria	AllantoinRoseburia	74	53
Imidazole	Roseburia	Metabolite	Bacteria	ImidazoleRoseburia	74	53
Carnitine	Roseburia	Metabolite	Bacteria	CarnitineRoseburia	74	53
Allantoin	Unclassified Burkholderiales	Metabolite	Bacteria	AllantoinUnclassified Burkholderiales	74	53
Nicotinate	Roseburia	Metabolite	Bacteria	NicotinateRoseburia	74	53
3-Phenylpropionate	Roseburia	Metabolite	Bacteria	3-PhenylpropionateRoseburia	74	53
3-Phenylpropionate	Anaerovibrio	Metabolite	Bacteria	3-PhenylpropionateAnaerovibrio	74	51
Benzoate	Anaerovibrio	Metabolite	Bacteria	BenzoateAnaerovibrio	74	51
Imidazole	Anaerovibrio	Metabolite	Bacteria	ImidazoleAnaerovibrio	74	51
Nicotinate	Anaerovibrio	Metabolite	Bacteria	NicotinateAnaerovibrio	74	51
Ethanol	Anaerovibrio	Metabolite	Bacteria	EthanolAnaerovibrio	74	51
Acetone	Anaerovibrio	Metabolite	Bacteria	AcetoneAnaerovibrio	74	51
Acetone	Succiniclasticum	Metabolite	Bacteria	AcetoneSucciniclasticum	74	51
Imidazole	Succiniclasticum	Metabolite	Bacteria	ImidazoleSucciniclasticum	74	51
Benzoate	Succiniclasticum	Metabolite	Bacteria	BenzoateSucciniclasticum	74	51
Allantoin	Anaerovibrio	Metabolite	Bacteria	AllantoinAnaerovibrio	74	51
Allantoin	Succiniclasticum	Metabolite	Bacteria	AllantoinSucciniclasticum	74	51
Ethanol	Succiniclasticum	Metabolite	Bacteria	EthanolSucciniclasticum	74	51
Nicotinate	Succiniclasticum	Metabolite	Bacteria	NicotinateSucciniclasticum	74	51
3-Phenylpropionate	Succiniclasticum	Metabolite	Bacteria	3-PhenylpropionateSucciniclasticum	74	51
Carnitine	Sharpea	Metabolite	Bacteria	CarnitineSharpea	74	50
3-Phenylpropionate	Unclassified Acidaminococcaceae	Metabolite	Bacteria	3-PhenylpropionateUnclassified Acidaminococcaceae	74	50
Benzoate	Unclassified Acidaminococcaceae	Metabolite	Bacteria	BenzoateUnclassified Acidaminococcaceae	74	50
Imidazole	Unclassified Acidaminococcaceae	Metabolite	Bacteria	ImidazoleUnclassified Acidaminococcaceae	74	50
Nicotinate	Unclassified Acidaminococcaceae	Metabolite	Bacteria	NicotinateUnclassified Acidaminococcaceae	74	50
Carnitine	Catenisphaera	Metabolite	Bacteria	CarnitineCatenisphaera	74	50
Allantoin	Catenisphaera	Metabolite	Bacteria	AllantoinCatenisphaera	74	50
Ethanol	Unclassified Acidaminococcaceae	Metabolite	Bacteria	EthanolUnclassified Acidaminococcaceae	74	50
3-Phenylpropionate	Fibrobacter	Metabolite	Bacteria	3-PhenylpropionateFibrobacter	74	50
Acetone	Unclassified Desulfobulbaceae	Metabolite	Bacteria	AcetoneUnclassified Desulfobulbaceae	74	50
Imidazole	Fibrobacter	Metabolite	Bacteria	ImidazoleFibrobacter	74	50
Acetone	Unclassified Acidaminococcaceae	Metabolite	Bacteria	AcetoneUnclassified Acidaminococcaceae	74	50
3-Phenylpropionate	Sharpea	Metabolite	Bacteria	3-PhenylpropionateSharpea	74	50
Acetone	Sharpea	Metabolite	Bacteria	AcetoneSharpea	74	50
Nicotinate	Fibrobacter	Metabolite	Bacteria	NicotinateFibrobacter	74	50
3-Phenylpropionate	Catenisphaera	Metabolite	Bacteria	3-PhenylpropionateCatenisphaera	74	50
Benzoate	Catenisphaera	Metabolite	Bacteria	BenzoateCatenisphaera	74	50
Ethanol	Fibrobacter	Metabolite	Bacteria	EthanolFibrobacter	74	50
Nicotinate	Sharpea	Metabolite	Bacteria	NicotinateSharpea	74	50
Imidazole	Sharpea	Metabolite	Bacteria	ImidazoleSharpea	74	50
Benzoate	Fibrobacter	Metabolite	Bacteria	BenzoateFibrobacter	74	50
Ethanol	Sharpea	Metabolite	Bacteria	EthanolSharpea	74	50
3-Phenylpropionate	Unclassified Desulfobulbaceae	Metabolite	Bacteria	3-PhenylpropionateUnclassified Desulfobulbaceae	74	50
Benzoate	Sharpea	Metabolite	Bacteria	BenzoateSharpea	74	50
Ethanol	Catenisphaera	Metabolite	Bacteria	EthanolCatenisphaera	74	50
Benzoate	Unclassified Desulfobulbaceae	Metabolite	Bacteria	BenzoateUnclassified Desulfobulbaceae	74	50
Ethanol	Unclassified Desulfobulbaceae	Metabolite	Bacteria	EthanolUnclassified Desulfobulbaceae	74	50
Nicotinate	Catenisphaera	Metabolite	Bacteria	NicotinateCatenisphaera	74	50
Allantoin	Unclassified Desulfobulbaceae	Metabolite	Bacteria	AllantoinUnclassified Desulfobulbaceae	74	50
Nicotinate	Unclassified Desulfobulbaceae	Metabolite	Bacteria	NicotinateUnclassified Desulfobulbaceae	74	50
Allantoin	Sharpea	Metabolite	Bacteria	AllantoinSharpea	74	50
Allantoin	Fibrobacter	Metabolite	Bacteria	AllantoinFibrobacter	74	50
Imidazole	Unclassified Desulfobulbaceae	Metabolite	Bacteria	ImidazoleUnclassified Desulfobulbaceae	74	50
Carnitine	Unclassified Desulfobulbaceae	Metabolite	Bacteria	CarnitineUnclassified Desulfobulbaceae	74	50
Imidazole	Catenisphaera	Metabolite	Bacteria	ImidazoleCatenisphaera	74	50
Acetone	Catenisphaera	Metabolite	Bacteria	AcetoneCatenisphaera	74	50
Carnitine	Acidaminococcus	Metabolite	Bacteria	CarnitineAcidaminococcus	74	49
Imidazole	Acidaminococcus	Metabolite	Bacteria	ImidazoleAcidaminococcus	74	49
Imidazole	Unclassified Spirochaetaceae	Metabolite	Bacteria	ImidazoleUnclassified Spirochaetaceae	74	49
Nicotinate	Acidaminococcus	Metabolite	Bacteria	NicotinateAcidaminococcus	74	49
Nicotinate	Unclassified Spirochaetaceae	Metabolite	Bacteria	NicotinateUnclassified Spirochaetaceae	74	49
Acetone	Acidaminococcus	Metabolite	Bacteria	AcetoneAcidaminococcus	74	49
Allantoin	Unclassified Spirochaetaceae	Metabolite	Bacteria	AllantoinUnclassified Spirochaetaceae	74	49
Ethanol	Acidaminococcus	Metabolite	Bacteria	EthanolAcidaminococcus	74	49
3-Phenylpropionate	Unclassified Spirochaetaceae	Metabolite	Bacteria	3-PhenylpropionateUnclassified Spirochaetaceae	74	49
Allantoin	Acidaminococcus	Metabolite	Bacteria	AllantoinAcidaminococcus	74	49
3-Phenylpropionate	Acidaminococcus	Metabolite	Bacteria	3-PhenylpropionateAcidaminococcus	74	49
Acetone	Unclassified Spirochaetaceae	Metabolite	Bacteria	AcetoneUnclassified Spirochaetaceae	74	49
Ethanol	Unclassified Spirochaetaceae	Metabolite	Bacteria	EthanolUnclassified Spirochaetaceae	74	49
Benzoate	Lactobacillus	Metabolite	Bacteria	BenzoateLactobacillus	74	48
Imidazole	Lactobacillus	Metabolite	Bacteria	ImidazoleLactobacillus	74	48
Carnitine	Pseudoscardovia	Metabolite	Bacteria	CarnitinePseudoscardovia	74	48
Imidazole	Denitrobacterium	Metabolite	Bacteria	ImidazoleDenitrobacterium	74	48
Nicotinate	Pseudoscardovia	Metabolite	Bacteria	NicotinatePseudoscardovia	74	48
Imidazole	Pseudoscardovia	Metabolite	Bacteria	ImidazolePseudoscardovia	74	48
Acetone	Lactobacillus	Metabolite	Bacteria	AcetoneLactobacillus	74	48
Allantoin	Unclassified Coriobacteriaceae	Metabolite	Bacteria	AllantoinUnclassified Coriobacteriaceae	74	48
Allantoin	Lactobacillus	Metabolite	Bacteria	AllantoinLactobacillus	74	48
Benzoate	Denitrobacterium	Metabolite	Bacteria	BenzoateDenitrobacterium	74	48
Ethanol	Pseudoscardovia	Metabolite	Bacteria	EthanolPseudoscardovia	74	48
Ethanol	Lactobacillus	Metabolite	Bacteria	EthanolLactobacillus	74	48
Carnitine	Lactobacillus	Metabolite	Bacteria	CarnitineLactobacillus	74	48
Acetone	Unclassified Coriobacteriaceae	Metabolite	Bacteria	AcetoneUnclassified Coriobacteriaceae	74	48
Allantoin	Denitrobacterium	Metabolite	Bacteria	AllantoinDenitrobacterium	74	48
3-Phenylpropionate	Unclassified Coriobacteriaceae	Metabolite	Bacteria	3-PhenylpropionateUnclassified Coriobacteriaceae	74	48
Acetone	Pseudoscardovia	Metabolite	Bacteria	AcetonePseudoscardovia	74	48
3-Phenylpropionate	Pseudoscardovia	Metabolite	Bacteria	3-PhenylpropionatePseudoscardovia	74	48
Nicotinate	Denitrobacterium	Metabolite	Bacteria	NicotinateDenitrobacterium	74	48
Ethanol	Unclassified Coriobacteriaceae	Metabolite	Bacteria	EthanolUnclassified Coriobacteriaceae	74	48
3-Phenylpropionate	Lactobacillus	Metabolite	Bacteria	3-PhenylpropionateLactobacillus	74	48
Benzoate	Pseudoscardovia	Metabolite	Bacteria	BenzoatePseudoscardovia	74	48
3-Phenylpropionate	Denitrobacterium	Metabolite	Bacteria	3-PhenylpropionateDenitrobacterium	74	48
Carnitine	Unclassified Coriobacteriaceae	Metabolite	Bacteria	CarnitineUnclassified Coriobacteriaceae	74	48
Acetone	Corynebacterium	Metabolite	Bacteria	AcetoneCorynebacterium	74	47
Carnitine	Unclassified Betaproteobacteria	Metabolite	Bacteria	CarnitineUnclassified Betaproteobacteria	74	47
Nicotinate	Unclassified Betaproteobacteria	Metabolite	Bacteria	NicotinateUnclassified Betaproteobacteria	74	47
Imidazole	Unclassified Betaproteobacteria	Metabolite	Bacteria	ImidazoleUnclassified Betaproteobacteria	74	47
Imidazole	Unclassified Gammaproteobacteria	Metabolite	Bacteria	ImidazoleUnclassified Gammaproteobacteria	74	47
Ethanol	Corynebacterium	Metabolite	Bacteria	EthanolCorynebacterium	74	47
Imidazole	Unclassified Bacteroidia	Metabolite	Bacteria	ImidazoleUnclassified Bacteroidia	74	47
Benzoate	Corynebacterium	Metabolite	Bacteria	BenzoateCorynebacterium	74	47
Ethanol	Unclassified Bacteroidia	Metabolite	Bacteria	EthanolUnclassified Bacteroidia	74	47
Nicotinate	Unclassified Gammaproteobacteria	Metabolite	Bacteria	NicotinateUnclassified Gammaproteobacteria	74	47
3-Phenylpropionate	Unclassified Betaproteobacteria	Metabolite	Bacteria	3-PhenylpropionateUnclassified Betaproteobacteria	74	47
Carnitine	Corynebacterium	Metabolite	Bacteria	CarnitineCorynebacterium	74	47
3-Phenylpropionate	Unclassified Bacteroidia	Metabolite	Bacteria	3-PhenylpropionateUnclassified Bacteroidia	74	47
Benzoate	Unclassified Bacteroidia	Metabolite	Bacteria	BenzoateUnclassified Bacteroidia	74	47
Benzoate	Unclassified Betaproteobacteria	Metabolite	Bacteria	BenzoateUnclassified Betaproteobacteria	74	47
Nicotinate	Unclassified Bacteroidia	Metabolite	Bacteria	NicotinateUnclassified Bacteroidia	74	47
Ethanol	Unclassified Gammaproteobacteria	Metabolite	Bacteria	EthanolUnclassified Gammaproteobacteria	74	47
Allantoin	Unclassified Gammaproteobacteria	Metabolite	Bacteria	AllantoinUnclassified Gammaproteobacteria	74	47
Ethanol	Unclassified Betaproteobacteria	Metabolite	Bacteria	EthanolUnclassified Betaproteobacteria	74	47
3-Phenylpropionate	Unclassified Gammaproteobacteria	Metabolite	Bacteria	3-PhenylpropionateUnclassified Gammaproteobacteria	74	47
Carnitine	Unclassified Bacteroidia	Metabolite	Bacteria	CarnitineUnclassified Bacteroidia	74	47
Allantoin	Corynebacterium	Metabolite	Bacteria	AllantoinCorynebacterium	74	47
Nicotinate	Corynebacterium	Metabolite	Bacteria	NicotinateCorynebacterium	74	47
Allantoin	Unclassified Bacteroidia	Metabolite	Bacteria	AllantoinUnclassified Bacteroidia	74	47
Imidazole	Corynebacterium	Metabolite	Bacteria	ImidazoleCorynebacterium	74	47
Acetone	Unclassified Betaproteobacteria	Metabolite	Bacteria	AcetoneUnclassified Betaproteobacteria	74	47
Acetone	Unclassified Bacteroidia	Metabolite	Bacteria	AcetoneUnclassified Bacteroidia	74	47
Nicotinate	Unclassified Ruminococcaceae	Metabolite	Bacteria	NicotinateUnclassified Ruminococcaceae	74	46
Benzoate	Schwartzia	Metabolite	Bacteria	BenzoateSchwartzia	74	46
Imidazole	Schwartzia	Metabolite	Bacteria	ImidazoleSchwartzia	74	46
Benzoate	Unclassified Ruminococcaceae	Metabolite	Bacteria	BenzoateUnclassified Ruminococcaceae	74	46
Ethanol	Bifidobacterium	Metabolite	Bacteria	EthanolBifidobacterium	74	46
3-Phenylpropionate	Schwartzia	Metabolite	Bacteria	3-PhenylpropionateSchwartzia	74	46
Benzoate	Bifidobacterium	Metabolite	Bacteria	BenzoateBifidobacterium	74	46
Carnitine	Bifidobacterium	Metabolite	Bacteria	CarnitineBifidobacterium	74	46
Allantoin	Unclassified SR1_genera_incertae_sedis	Metabolite	Bacteria	AllantoinUnclassified SR1_genera_incertae_sedis	74	46
Ethanol	Unclassified Prevotellaceae	Metabolite	Bacteria	EthanolUnclassified Prevotellaceae	74	46
Carnitine	Unclassified Ruminococcaceae	Metabolite	Bacteria	CarnitineUnclassified Ruminococcaceae	74	46
3-Phenylpropionate	Unclassified SR1_genera_incertae_sedis	Metabolite	Bacteria	3-PhenylpropionateUnclassified SR1_genera_incertae_sedis	74	46
Imidazole	Unclassified Ruminococcaceae	Metabolite	Bacteria	ImidazoleUnclassified Ruminococcaceae	74	46
Nicotinate	Bifidobacterium	Metabolite	Bacteria	NicotinateBifidobacterium	74	46
Ethanol	Unclassified SR1_genera_incertae_sedis	Metabolite	Bacteria	EthanolUnclassified SR1_genera_incertae_sedis	74	46
Allantoin	Unclassified Ruminococcaceae	Metabolite	Bacteria	AllantoinUnclassified Ruminococcaceae	74	46
Acetone	Bifidobacterium	Metabolite	Bacteria	AcetoneBifidobacterium	74	46
Ethanol	Unclassified Ruminococcaceae	Metabolite	Bacteria	EthanolUnclassified Ruminococcaceae	74	46
Nicotinate	Unclassified SR1_genera_incertae_sedis	Metabolite	Bacteria	NicotinateUnclassified SR1_genera_incertae_sedis	74	46
Carnitine	Schwartzia	Metabolite	Bacteria	CarnitineSchwartzia	74	46
Acetone	Unclassified SR1_genera_incertae_sedis	Metabolite	Bacteria	AcetoneUnclassified SR1_genera_incertae_sedis	74	46
Allantoin	Schwartzia	Metabolite	Bacteria	AllantoinSchwartzia	74	46
Imidazole	Unclassified SR1_genera_incertae_sedis	Metabolite	Bacteria	ImidazoleUnclassified SR1_genera_incertae_sedis	74	46
Allantoin	Bifidobacterium	Metabolite	Bacteria	AllantoinBifidobacterium	74	46
Benzoate	Unclassified SR1_genera_incertae_sedis	Metabolite	Bacteria	BenzoateUnclassified SR1_genera_incertae_sedis	74	46
Acetone	Unclassified Prevotellaceae	Metabolite	Bacteria	AcetoneUnclassified Prevotellaceae	74	46
Acetone	Schwartzia	Metabolite	Bacteria	AcetoneSchwartzia	74	46
Benzoate	Unclassified Streptococcaceae	Metabolite	Bacteria	BenzoateUnclassified Streptococcaceae	74	45
Allantoin	Unclassified Streptococcaceae	Metabolite	Bacteria	AllantoinUnclassified Streptococcaceae	74	45
Acetone	Unclassified Clostridiales_Incertae Sedis XIII	Metabolite	Bacteria	AcetoneUnclassified Clostridiales_Incertae Sedis XIII	74	45
Ethanol	Unclassified Clostridiales_Incertae Sedis XIII	Metabolite	Bacteria	EthanolUnclassified Clostridiales_Incertae Sedis XIII	74	45
3-Phenylpropionate	Unclassified Clostridiales_Incertae Sedis XIII	Metabolite	Bacteria	3-PhenylpropionateUnclassified Clostridiales_Incertae Sedis XIII	74	45
Imidazole	Unclassified Clostridiales_Incertae Sedis XIII	Metabolite	Bacteria	ImidazoleUnclassified Clostridiales_Incertae Sedis XIII	74	45
Nicotinate	Unclassified Streptococcaceae	Metabolite	Bacteria	NicotinateUnclassified Streptococcaceae	74	45
Allantoin	Unclassified Clostridiales_Incertae Sedis XIII	Metabolite	Bacteria	AllantoinUnclassified Clostridiales_Incertae Sedis XIII	74	45
Carnitine	Unclassified Clostridiales_Incertae Sedis XIII	Metabolite	Bacteria	CarnitineUnclassified Clostridiales_Incertae Sedis XIII	74	45
Benzoate	Unclassified Clostridiales_Incertae Sedis XIII	Metabolite	Bacteria	BenzoateUnclassified Clostridiales_Incertae Sedis XIII	74	45
Imidazole	Unclassified Streptococcaceae	Metabolite	Bacteria	ImidazoleUnclassified Streptococcaceae	74	45
Nicotinate	Unclassified Clostridiales_Incertae Sedis XIII	Metabolite	Bacteria	NicotinateUnclassified Clostridiales_Incertae Sedis XIII	74	45
Ethanol	Unclassified Streptococcaceae	Metabolite	Bacteria	EthanolUnclassified Streptococcaceae	74	45
Benzoate	Syntrophococcus	Metabolite	Bacteria	BenzoateSyntrophococcus	74	44
Benzoate	Unclassified Selenomonadales	Metabolite	Bacteria	BenzoateUnclassified Selenomonadales	74	44
Acetone	Syntrophococcus	Metabolite	Bacteria	AcetoneSyntrophococcus	74	44
Acetone	Unclassified Selenomonadales	Metabolite	Bacteria	AcetoneUnclassified Selenomonadales	74	44
Imidazole	Anaeroplasma	Metabolite	Bacteria	ImidazoleAnaeroplasma	74	44
Carnitine	Syntrophococcus	Metabolite	Bacteria	CarnitineSyntrophococcus	74	44
Allantoin	Syntrophococcus	Metabolite	Bacteria	AllantoinSyntrophococcus	74	44
Carnitine	Unclassified Selenomonadales	Metabolite	Bacteria	CarnitineUnclassified Selenomonadales	74	44
Benzoate	Butyrivibrio	Metabolite	Bacteria	BenzoateButyrivibrio	74	44
Ethanol	Syntrophococcus	Metabolite	Bacteria	EthanolSyntrophococcus	74	44
Acetone	Anaeroplasma	Metabolite	Bacteria	AcetoneAnaeroplasma	74	44
Allantoin	Butyrivibrio	Metabolite	Bacteria	AllantoinButyrivibrio	74	44
Nicotinate	Butyrivibrio	Metabolite	Bacteria	NicotinateButyrivibrio	74	44
Nicotinate	Anaeroplasma	Metabolite	Bacteria	NicotinateAnaeroplasma	74	44
Allantoin	Anaeroplasma	Metabolite	Bacteria	AllantoinAnaeroplasma	74	44
3-Phenylpropionate	Butyrivibrio	Metabolite	Bacteria	3-PhenylpropionateButyrivibrio	74	44
3-Phenylpropionate	Syntrophococcus	Metabolite	Bacteria	3-PhenylpropionateSyntrophococcus	74	44
Ethanol	Unclassified Selenomonadales	Metabolite	Bacteria	EthanolUnclassified Selenomonadales	74	44
Ethanol	Butyrivibrio	Metabolite	Bacteria	EthanolButyrivibrio	74	44
Imidazole	Unclassified Selenomonadales	Metabolite	Bacteria	ImidazoleUnclassified Selenomonadales	74	44
Acetone	Butyrivibrio	Metabolite	Bacteria	AcetoneButyrivibrio	74	44
Carnitine	Butyrivibrio	Metabolite	Bacteria	CarnitineButyrivibrio	74	44
Imidazole	Butyrivibrio	Metabolite	Bacteria	ImidazoleButyrivibrio	74	44
Carnitine	Anaeroplasma	Metabolite	Bacteria	CarnitineAnaeroplasma	74	44
Allantoin	Prevotella	Metabolite	Bacteria	AllantoinPrevotella	74	41
Nicotinate	Unclassified Bacteroidales	Metabolite	Bacteria	NicotinateUnclassified Bacteroidales	74	41
Imidazole	Prevotella	Metabolite	Bacteria	ImidazolePrevotella	74	41
Benzoate	Prevotella	Metabolite	Bacteria	BenzoatePrevotella	74	41
Carnitine	Unclassified Bacteroidales	Metabolite	Bacteria	CarnitineUnclassified Bacteroidales	74	41
3-Phenylpropionate	Unclassified Bacteroidales	Metabolite	Bacteria	3-PhenylpropionateUnclassified Bacteroidales	74	41
Imidazole	Unclassified Bacteroidales	Metabolite	Bacteria	ImidazoleUnclassified Bacteroidales	74	41
3-Phenylpropionate	Prevotella	Metabolite	Bacteria	3-PhenylpropionatePrevotella	74	41
Nicotinate	Prevotella	Metabolite	Bacteria	NicotinatePrevotella	74	41
Benzoate	Unclassified Bacteroidales	Metabolite	Bacteria	BenzoateUnclassified Bacteroidales	74	41
Imidazole	Selenomonas	Metabolite	Bacteria	ImidazoleSelenomonas	74	40
Nicotinate	Selenomonas	Metabolite	Bacteria	NicotinateSelenomonas	74	40
Allantoin	Allisonella	Metabolite	Bacteria	AllantoinAllisonella	74	40
Carnitine	Allisonella	Metabolite	Bacteria	CarnitineAllisonella	74	40
Benzoate	Allisonella	Metabolite	Bacteria	BenzoateAllisonella	74	40
Imidazole	Allisonella	Metabolite	Bacteria	ImidazoleAllisonella	74	40
Ethanol	Allisonella	Metabolite	Bacteria	EthanolAllisonella	74	40
3-Phenylpropionate	Allisonella	Metabolite	Bacteria	3-PhenylpropionateAllisonella	74	40
Nicotinate	Unclassified Bacteroidetes	Metabolite	Bacteria	NicotinateUnclassified Bacteroidetes	74	39
Benzoate	Unclassified Bacteroidetes	Metabolite	Bacteria	BenzoateUnclassified Bacteroidetes	74	39
Carnitine	Unclassified Bacteroidetes	Metabolite	Bacteria	CarnitineUnclassified Bacteroidetes	74	39
Acetone	Unclassified Bacteroidetes	Metabolite	Bacteria	AcetoneUnclassified Bacteroidetes	74	39
3-Phenylpropionate	Unclassified Bacteroidetes	Metabolite	Bacteria	3-PhenylpropionateUnclassified Bacteroidetes	74	39
Imidazole	Unclassified Bacteroidetes	Metabolite	Bacteria	ImidazoleUnclassified Bacteroidetes	74	39
Ethanol	Unclassified Bacteroidetes	Metabolite	Bacteria	EthanolUnclassified Bacteroidetes	74	39
Carnitine	Clostridium sensu stricto	Metabolite	Bacteria	CarnitineClostridium sensu stricto	74	38
3-Phenylpropionate	Succinivibrio	Metabolite	Bacteria	3-PhenylpropionateSuccinivibrio	74	38
Allantoin	Clostridium sensu stricto	Metabolite	Bacteria	AllantoinClostridium sensu stricto	74	38
Allantoin	Succinivibrio	Metabolite	Bacteria	AllantoinSuccinivibrio	74	38
Benzoate	Unclassified Firmicutes	Metabolite	Bacteria	BenzoateUnclassified Firmicutes	74	38
Benzoate	Clostridium sensu stricto	Metabolite	Bacteria	BenzoateClostridium sensu stricto	74	38
Acetone	Clostridium sensu stricto	Metabolite	Bacteria	AcetoneClostridium sensu stricto	74	38
Nicotinate	Unclassified Clostridia	Metabolite	Bacteria	NicotinateUnclassified Clostridia	74	38
Carnitine	Unclassified Firmicutes	Metabolite	Bacteria	CarnitineUnclassified Firmicutes	74	38
Ethanol	Clostridium sensu stricto	Metabolite	Bacteria	EthanolClostridium sensu stricto	74	38
Allantoin	Unclassified Actinobacteria	Metabolite	Bacteria	AllantoinUnclassified Actinobacteria	74	38
Imidazole	Clostridium sensu stricto	Metabolite	Bacteria	ImidazoleClostridium sensu stricto	74	38
Benzoate	Succinivibrio	Metabolite	Bacteria	BenzoateSuccinivibrio	74	38
Imidazole	Unclassified Firmicutes	Metabolite	Bacteria	ImidazoleUnclassified Firmicutes	74	38
Nicotinate	Clostridium sensu stricto	Metabolite	Bacteria	NicotinateClostridium sensu stricto	74	38
Carnitine	Unclassified Clostridia	Metabolite	Bacteria	CarnitineUnclassified Clostridia	74	38
3-Phenylpropionate	Unclassified Actinobacteria	Metabolite	Bacteria	3-PhenylpropionateUnclassified Actinobacteria	74	38
Acetone	Unclassified Actinobacteria	Metabolite	Bacteria	AcetoneUnclassified Actinobacteria	74	38
Benzoate	Unclassified Actinobacteria	Metabolite	Bacteria	BenzoateUnclassified Actinobacteria	74	38
Imidazole	Unclassified Actinobacteria	Metabolite	Bacteria	ImidazoleUnclassified Actinobacteria	74	38
[truncated: 2,795 more rows]

## Sheet: Summary Table
Supplementary Data 6
Summary Table
[truncated: 18 more rows]
